# Supplementary material for: Transcription factor network analysis identifies REST/NRSF as an intrinsic regulator of CNS regeneration
Source: Research Square preprint supplement (doi:10.21203/rs.3.rs-102518/v1), 2020-11-16
Supplement: Supplementary file 3 [file 47c39d33f49981a84e54836d.xlsx]

## Sheet: REST_geneInfo
Supplemental Table S1. Differentially expressed genes (DEGs) comparing wild-type and REST knockout cortical motor neurons at 0, 1, 3, 7 days after SCI. Day 0 indicates sham conditions. Related to Figure 3.
mgi_symbol	ensembl_gene_id	day1_SCIvsSham.logFC	day3_SCIvsSham.logFC	day7_SCIvsSham.logFC	day1_SCIvsSham.P.Value	day1_SCIvsSham.adj.P.Val	day3_SCIvsSham.P.Value	day3_SCIvsSham.adj.P.Val	day7_SCIvsSham.P.Value	day7_SCIvsSham.adj.P.Val	day0_RESTvsWT.logFC	day3_RESTvsWT.logFC	day7_RESTvsWT.logFC	day0_RESTvsWT.adj.P.Val	day3_RESTvsWT.adj.P.Val	day7_RESTvsWT.adj.P.Val	sample3.normCount	sample10.normCount	sample14.normCount	sample17.normCount	sample1.normCount	sample8.normCount	sample11.normCount	sample5.normCount	sample16.normCount	sample22.normCount	sample4.normCount	sample7.normCount	sample12.normCount	sample6.normCount	sample18.normCount	sample23.normCount	sample19.normCount	sample25.normCount	sample9.normCount	sample15.normCount	sample20.normCount	sample27.normCount	sample2.normCount	sample13.normCount	sample26.normCount
Gnai3	ENSMUSG00000000001	-0.714215	-0.798196	0.677558	0.357944	0.805578	0.494031	0.892478	0.301202	0.988096	-0.824826	-0.0391094	0.229793	0.907915	0.999931	0.924576	0.569165	1.80175	0.642961	1.76693	1.95405	0.385655	0.620803	1.31704	0.767666	1.40398	1.33884	2.14789	-1.15123	-0.480598	-0.743617	1.08201	1.4688	2.23865	-0.228159	0.795746	0.674904	-0.296878	-3.17906	1.70842	1.70643
Narf	ENSMUSG00000000056	-0.290044	-0.274625	-0.232788	0.490903	0.867602	0.605607	0.916973	0.492903	0.999571	0.898963	1.15635	0.624837	0.834588	0.917063	0.638737	-0.905053	-0.515934	-3.1929	-2.23149	-2.35979	-1.27015	-0.742388	-2.25507	-2.98177	-1.52565	-3.77193	-3.28782	-2.03985	0.126621	-1.45709	-1.18721	-0.417426	-0.792222	-0.997346	0.37699	-0.870408	-1.24944	-0.442796	0.27953	0.312256
Klf6	ENSMUSG00000000078	-0.138065	0.0965057	0.166878	0.664364	0.930194	0.822353	0.963719	0.585272	0.999571	-0.159646	0.146794	0.365856	0.962881	0.999931	0.590633	1.92553	1.48079	2.08334	1.79044	1.2668	1.91049	2.03136	1.70455	2.05713	1.87816	2.18838	2.28359	2.21283	1.73914	1.13829	3.12462	2.40412	2.07941	1.81199	2.07358	2.2229	2.56613	2.6556	2.55377	2.16482
Scmh1	ENSMUSG00000000085	0.0431996	1.64958	1.77243	0.940054	0.988759	0.0526918	0.450066	3.92576e-05	0.00565849	1.11959	-1.06565	-2.25502	0.724986	0.957617	0.0101635	-3.506	-2.91983	0.648079	1.72803	1.49678	0.384724	-2.66786	-2.24987	1.64011	0.691977	1.51834	0.91537	2.48069	1.24311	-0.389929	-1.77282	-1.49187	0.850316	1.4112	-1.64316	-1.427	1.1317	-1.73	-1.01849	-0.586794
Cox5a	ENSMUSG00000000088	0.550177	0.988961	0.256398	0.247899	0.732205	0.100496	0.62713	0.661214	0.999571	0.19595	-0.466356	1.00445	0.968152	0.879655	0.333383	2.06314	1.63226	1.80019	1.69245	2.72329	2.46507	1.78306	2.41697	2.64289	1.56364	1.67626	1.8581	1.81286	2.04258	2.22968	2.03693	2.4845	2.22239	2.43526	2.90829	2.22619	2.08508	2.7009	2.87097	2.74671
Xpo6	ENSMUSG00000000131	-0.264902	-0.800367	-0.995896	0.536952	0.885519	0.408184	0.873079	0.0935166	0.703568	0.245626	-0.260069	-0.00724468	0.956152	0.999931	0.997071	3.25161	2.34115	0.776077	1.35565	-0.980828	1.89228	2.70108	0.764089	1.07047	0.88042	0.525557	0.672014	1.55593	1.17323	1.12957	1.85554	0.491885	2.38773	0.481732	0.877418	0.408853	0.176481	2.40547	1.05888	1.64125
Tfe3	ENSMUSG00000000134	-0.509571	-0.624729	0.0786554	0.464407	0.852805	0.607017	0.917729	0.906712	0.999571	0.299328	0.799707	0.0166026	0.957281	0.999931	0.994523	0.412206	2.67407	-0.296458	1.28329	-0.272001	0.315237	0.694106	-1.94022	0.415529	-0.845264	1.25217	0.132192	2.80007	0.713357	-0.654099	2.07933	0.405871	3.02875	0.594417	1.29682	1.2633	0.85889	1.64476	1.41665	1.64207
Axin2	ENSMUSG00000000142	1.228	1.30032	-0.475116	0.018608	0.231217	0.0657691	0.50224	0.281329	0.976678	0.604484	-1.29814	1.73246	0.939796	0.712728	0.0742767	-0.589967	-2.95106	2.24004	-0.536856	1.80748	1.89685	-0.643089	2.42029	2.44828	0.854222	-0.574219	-3.05439	-2.85144	1.33265	1.70944	-2.14103	1.15504	0.886185	2.07495	0.014539	0.317728	0.327255	1.70267	1.0063	2.12201
Gna12	ENSMUSG00000000149	0.251425	-2.0943	0.051481	0.616033	0.914101	0.000415027	0.0141171	0.938391	0.999571	0.0032742	1.60843	-0.0498823	0.999631	0.479557	0.982824	2.27323	1.54164	0.887639	0.904833	-2.01961	1.71232	1.78568	3.23998	-1.87689	1.12797	1.28005	-0.246124	2.65019	0.92255	-1.09849	0.561239	1.60195	1.63	1.79111	1.05212	1.57368	3.3891	0.30909	2.05972	2.41033
Dlat	ENSMUSG00000000168	-0.51488	-1.40997	0.315105	0.506655	0.87501	0.140663	0.711708	0.643666	0.999571	0.415536	0.0496032	0.99946	0.949635	0.999931	0.390794	2.82491	1.46551	0.0495045	1.11061	-1.19362	0.409373	1.97031	2.63082	0.364178	0.478219	1.70548	-0.293638	1.27286	1.17389	-2.45585	1.98197	1.30155	1.2981	1.27038	0.317515	-2.58756	2.16286	-2.29382	3.33988	0.178747
Sdhd	ENSMUSG00000000171	0.524579	-0.640974	-0.0111421	0.328	0.789474	0.59095	0.914643	0.989262	0.999589	-0.642466	0.153026	-0.747041	0.942554	0.999931	0.49125	-0.507161	-0.147969	1.1655	-0.956388	0.349531	0.888602	-0.204373	-1.96569	-0.304577	0.526386	-0.472858	1.38985	-1.17546	-0.575756	-0.402037	1.39258	1.65793	1.56167	-0.0666232	0.357749	-0.0179265	1.03106	-3.09375	-1.55469	0.0672392
Ccnd2	ENSMUSG00000000184	-0.132179	0.242763	0.259061	0.582908	0.903186	0.473658	0.888755	0.16881	0.845224	-0.0403656	-0.0289215	-0.924114	0.988281	0.999931	0.0221499	2.09141	1.78992	2.75226	2.25227	3.44188	2.51319	1.8772	2.52006	2.78235	2.44828	3.10934	2.52234	3.88957	2.62754	1.95087	2.10356	2.11444	2.5667	1.29132	3.34844	3.27487	3.14445	2.49906	1.73176	1.52272
Gpr107	ENSMUSG00000000194	-0.598521	-0.555074	-0.220817	0.100325	0.539251	0.422188	0.878209	0.542766	0.999571	-1.76667	0.030118	0.0210274	0.224354	0.999931	0.987312	2.42988	1.87774	1.94138	2.70213	0.858345	1.58564	1.43428	2.4306	1.36904	1.92655	2.28874	1.06953	2.43679	-0.973732	-0.579049	1.96639	1.41998	2.56233	0.69197	1.32236	1.49634	0.479183	2.46354	1.62445	2.01752
Btbd17	ENSMUSG00000000202	0.100152	-0.111153	1.67631	0.755162	0.951095	0.808253	0.961306	4.78348e-06	0.00104072	1.69501	0.486111	-0.770033	0.124549	0.999931	0.295244	-1.07441	-2.99714	-1.19578	0.248809	0.362357	-1.11507	0.632779	-2.13562	-0.965305	-1.18559	1.59718	1.30021	-0.112036	1.1612	0.390212	1.80758	-1.02483	2.07215	-0.0799039	1.67766	-0.964397	-2.36042	0.53176	-0.405309	0.884135
Drp2	ENSMUSG00000000223	0.214112	1.78578	0.656868	0.778009	0.954467	0.017206	0.228957	0.292102	0.978766	0.877399	-0.894478	-1.61904	0.901184	0.901843	0.339937	0.603587	-0.420161	-2.21032	-0.336073	-0.297747	0.576543	-0.491587	-2.68266	1.0133	1.03607	-0.388638	-0.454251	1.41683	0.170217	1.71659	-1.66853	0.84549	1.41409	1.23391	1.0137	0.213233	0.711529	1.92394	-1.87346	-0.0349229
Tspan32	ENSMUSG00000000244	-0.779938	0.91943	-0.0876015	0.291678	0.76812	0.155131	0.732963	0.897204	0.999571	-1.08173	-0.842126	-0.117256	0.818771	0.536587	0.940937	1.14455	1.54874	0.444193	0.495958	1.25898	-0.0314973	0.923985	1.01613	1.41336	0.747602	1.47012	0.474612	0.7618	-0.201168	0.387566	1.15414	0.844748	0.946746	1.03102	2.11935	0.519933	1.06132	0.439674	0.766094	0.583068
Mid2	ENSMUSG00000000266	0.950219	1.49179	0.762066	0.0688439	0.454662	0.110238	0.648932	0.274376	0.971181	1.11582	-0.480385	0.158114	0.811262	0.999931	0.943768	0.62248	-3.2155	-4.41236	-1.04869	-1.79233	1.10661	-0.0969522	-3.2793	-0.783496	0.336239	0.236383	-2.85706	-0.360515	-0.186346	0.0642822	-2.56979	-0.446269	0.850774	-0.459161	-1.34087	-1.23773	-1.0021	-0.188986	-0.663805	-1.75847
Trim25	ENSMUSG00000000275	-0.502231	0.348077	0.540557	0.520445	0.879434	0.591636	0.914866	0.229624	0.934428	-0.721148	-0.0933178	0.257114	0.912858	0.999931	0.317029	0.496674	2.12824	1.80613	1.70751	2.13078	0.646429	1.45672	2.83679	2.35047	1.1296	2.27426	2.3458	2.33965	1.03695	-0.263383	1.70169	2.1158	2.06615	2.10448	1.45058	2.10778	1.17347	2.27254	2.89967	2.69076
Dgke	ENSMUSG00000000276	1.28802	1.14975	-0.260314	0.0094225	0.157237	0.118998	0.672797	0.687592	0.999571	0.555817	-0.788912	1.11323	0.940715	0.847691	0.485507	-0.105244	0.495603	1.14451	0.342185	2.0424	2.21464	1.901	1.13655	2.28173	1.27349	-0.346186	-0.0998657	-1.14263	1.77782	1.61661	1.75344	1.29671	1.60355	1.93856	1.59549	1.60411	0.017883	2.09624	1.07342	1.57298
Scpep1	ENSMUSG00000000278	0.17161	-0.936108	-0.697797	0.763783	0.952025	0.42864	0.87885	0.350621	0.999571	-1.51124	-0.419229	-0.580799	0.435572	0.999931	0.78441	1.63101	2.13736	0.73385	0.0773843	0.058112	1.68737	0.129571	-2.21165	1.28914	0.66696	-0.0952578	0.760925	2.36324	-0.627656	-0.701199	0.956135	-1.9398	1.47728	0.593263	0.864881	0.963827	1.87883	-0.483393	1.77664	0.142365
Mnt	ENSMUSG00000000282	0.221678	-0.697178	-0.585073	0.702228	0.941719	0.518377	0.897778	0.273966	0.970835	-0.770933	-0.761398	-0.550041	0.919668	0.999931	0.643525	-0.027229	-0.051728	1.90289	-0.852287	-1.95369	0.375365	0.967747	-2.00741	0.0448312	0.929291	0.818646	-0.236096	-1.61211	-0.303592	-0.808522	1.51053	0.00446863	2.36528	-3.78629	-0.95532	-0.339962	-1.57725	1.57721	-1.98612	0.700379
Itgb2	ENSMUSG00000000290	-0.341224	-0.493472	0.0445598	0.294935	0.768891	0.244759	0.825928	0.787289	0.999571	-0.33912	-0.248881	-0.333231	0.859497	0.999931	0.551704	3.00713	3.08173	3.39586	2.27092	3.05573	1.98177	2.63949	2.13727	2.98333	2.54765	3.12588	2.87389	2.93824	2.59794	2.83033	2.68017	2.59349	2.93327	2.72879	3.07313	2.07866	2.67485	2.29439	2.73284	3.03678
Tpd52l1	ENSMUSG00000000296	0.155006	1.19658	0.121937	0.740699	0.950167	0.248773	0.828883	0.765522	0.999571	0.150976	1.67826	0.0989002	0.972444	0.661665	0.963778	-2.95564	-2.9232	-1.29568	-1.35565	-0.614393	-0.0359058	-1.92596	2.90769	-0.507038	-2.65542	-2.80149	-2.97554	0.0870584	-0.190522	-4.14697	-2.72766	-0.199427	0.280173	-0.510157	-0.476083	2.24203	-0.174576	0.501037	-0.505832	-0.263623
Arvcf	ENSMUSG00000000325	-0.79993	-1.49718	-1.17958	0.181606	0.671829	0.198824	0.791422	0.0184558	0.335066	-1.809	-1.2181	1.05849	0.302101	0.862074	0.446597	-0.810562	1.60311	2.29372	0.872276	2.25095	-0.132775	-2.48401	-2.54117	1.06575	-1.53412	-0.709689	-0.657064	-1.33119	-0.76782	-1.09615	1.83221	-1.77234	1.54693	-3.02752	0.582701	-1.73288	-2.42904	2.05472	1.56459	-0.31259
Comt	ENSMUSG00000000326	-0.183089	0.223825	0.144665	0.320361	0.782203	0.265024	0.838973	0.459894	0.999571	-0.279333	0.0660883	-0.181865	0.8799	0.999931	0.135629	3.03439	2.35715	2.8616	2.8174	3.03417	3.08226	2.58434	2.47403	2.93453	2.87613	2.1749	3.11949	2.79946	2.49538	2.97197	2.95229	3.05608	2.92636	2.69625	3.19182	3.19891	2.65419	3.38887	2.78738	2.73225
Rtca	ENSMUSG00000000339	0.361918	0.111878	1.74989	0.527963	0.88295	0.927423	0.981946	0.00469311	0.159165	1.07521	-0.0549517	-0.68319	0.825494	0.999931	0.675937	-3.31571	1.94328	-1.74888	-0.07605	0.551781	-0.13228	1.30122	-2.54232	1.45709	0.610065	2.40975	1.87307	2.41465	2.0277	-1.09542	0.773522	1.4541	0.794369	1.91029	-1.64766	1.12248	1.2567	-0.238199	2.19111	0.399111
Dbt	ENSMUSG00000000340	-0.46907	-1.38638	-0.212765	0.451633	0.847582	0.103917	0.636695	0.778729	0.999571	-0.914019	1.44699	0.00602891	0.833827	0.72409	0.998855	1.74349	0.707411	0.0185919	1.56901	-0.570951	1.49579	-1.09156	-2.52998	-3.06725	1.2439	1.6851	-0.656697	1.51837	-3.17953	2.0669	1.22907	0.672681	-1.63291	1.65069	0.490115	0.283976	2.20878	1.3163	0.979018	-0.558762
Dazap2	ENSMUSG00000000346	0.0343299	0.0932203	0.345342	0.918935	0.985605	0.858365	0.969328	0.245674	0.949034	0.148033	-0.310748	-0.269649	0.957281	0.999931	0.723733	1.85944	2.41276	2.41849	2.45556	2.89184	2.22287	2.8869	3.53178	2.93595	2.21916	2.68891	2.61626	2.51276	2.763	2.42372	2.30726	2.48441	2.77897	2.81485	3.51315	2.03424	2.33892	2.36451	2.4951	3.00048
Mcts1	ENSMUSG00000000355	0.286745	0.274973	-0.0384205	0.605453	0.910231	0.54467	0.904088	0.926717	0.999571	-0.122581	-0.140617	-0.756846	0.97274	0.999931	0.544636	1.14772	1.45296	1.8732	-0.284231	2.64716	1.41224	0.272483	-2.24235	2.29623	1.16062	1.81821	1.06746	2.02657	1.78199	2.50432	1.78127	2.6872	2.13464	1.54671	0.617846	2.79054	2.06311	0.331594	-1.53654	2.15195
Trappc10	ENSMUSG00000000374	0.652618	-0.0860596	0.0343509	0.147461	0.62495	0.871638	0.972789	0.945553	0.999571	-1.51096	-0.51894	-0.826436	0.553596	0.935312	0.530447	-0.115198	1.76263	2.13829	0.0381931	1.43752	1.95219	1.81311	0.937248	2.11066	1.30121	2.20255	2.18224	1.56848	-0.0296699	1.46824	1.56769	1.29941	1.71386	1.69216	3.14174	1.01412	2.63193	2.24602	1.00664	0.644856
Ccm2	ENSMUSG00000000378	-1.49436	-1.0978	-1.23435	0.00286109	0.0796888	0.321819	0.849251	0.043533	0.524649	-0.431335	0.350718	0.264105	0.950205	0.999931	0.901454	1.44421	1.90372	0.540693	0.924362	-0.738131	-0.436674	-0.00735683	1.55228	0.942683	-0.591853	-3.03182	-0.459276	2.15164	1.25423	-1.47128	-0.492565	1.57231	1.63291	2.14017	0.688005	0.587699	0.972959	1.72731	1.84934	1.73972
Mx1	ENSMUSG00000000386	-1.55442	-0.14622	-0.0669877	0.00186141	0.0606327	0.902983	0.977859	0.919758	0.999571	0.110501	-0.0275717	-0.197511	0.986046	0.999931	0.939586	1.96221	-0.145952	0.755387	1.18921	0.433876	-0.852592	0.560908	1.21835	0.198191	1.48729	1.76279	-0.107057	1.17504	0.844215	-0.796218	1.00007	0.939087	1.66771	0.469258	1.73387	0.376293	1.37881	0.356758	0.839414	-0.031186
Ndufa9	ENSMUSG00000000399	-1.10533	-0.768497	0.799485	0.0216959	0.254502	0.533177	0.900665	0.233992	0.938928	0.630311	0.372505	-0.621679	0.92636	0.999931	0.679993	-0.535509	2.19999	-0.167604	1.93821	2.6737	-0.952643	-0.691666	-2.71124	-0.0382014	0.663145	0.737274	2.21085	1.54123	1.73154	1.56949	1.35733	0.559118	1.75261	1.79896	2.18752	0.32769	0.120778	0.334914	1.33685	1.59761
Lck	ENSMUSG00000000409	0.0384303	-1.58458	0.328633	0.96104	0.992717	0.0490865	0.43307	0.678942	0.999571	-1.36521	0.560118	0.537725	0.634367	0.999931	0.796293	1.96472	-0.0329031	0.808301	-2.44285	-2.95695	0.941626	0.501439	-2.99293	-2.45864	-1.67089	1.51977	1.77599	-2.44256	-3.02286	1.74138	-1.66258	1.11339	1.91512	-3.01788	-2.47851	0.555235	-1.62373	1.78539	0.570753	-0.0702398
Galnt1	ENSMUSG00000000420	0.733439	0.0450571	-0.395032	0.139395	0.617207	0.946627	0.985336	0.612342	0.999571	-0.258298	-0.453278	0.46788	0.957281	0.999931	0.770514	0.30325	2.00027	1.51883	0.551155	2.23454	2.19901	1.50146	1.97658	2.1601	1.98992	0.840154	0.852882	1.77699	1.69702	1.27002	1.01073	2.98773	0.711278	1.80023	1.78619	1.0399	1.836	2.50336	1.94373	2.08777
Myf5	ENSMUSG00000000435	-0.218677	0.504853	0.0625684	0.748593	0.951009	0.413262	0.87514	0.927725	0.999571	-0.34721	-0.0760765	-0.0927109	0.956375	0.999931	0.915653	1.11269	0.998437	1.15152	1.21986	1.00335	1.18026	1.2183	1.24802	1.19925	1.12683	0.955019	1.11141	1.05617	0.765454	1.07521	1.07737	1.22182	1.1363	0.969578	1.26242	1.26961	1.05912	1.22957	1.08751	1.01743
Raf1	ENSMUSG00000000441	0.605173	-1.2743	-1.50072	0.226634	0.716067	0.257778	0.833395	0.00115742	0.0615034	-0.405918	0.0326913	1.66764	0.933983	0.999931	0.0542836	-0.599882	1.44895	3.1895	0.402162	2.29182	1.62696	1.21239	3.08507	1.72643	-1.28988	-3.00384	-0.996781	-1.27595	2.35188	-1.06363	3.25396	1.10664	1.25292	2.11919	1.5432	0.627754	0.000640904	0.312911	2.31376	1.87514
Pdgfb	ENSMUSG00000000489	-1.13484	-0.584716	0.249528	0.0829247	0.497024	0.543675	0.903893	0.614992	0.999571	-0.430137	0.182727	-0.832554	0.929075	0.999931	0.444956	0.849304	1.44211	3.00785	1.87464	1.62226	0.0669485	0.461587	1.0831	1.31662	1.66724	1.4457	2.52586	2.06492	2.01802	1.88552	0.0985215	1.58499	1.93604	2.28971	1.06906	1.13144	1.70135	2.02244	1.41391	1.88523
Acvrl1	ENSMUSG00000000530	-1.17475	-0.927288	-0.121165	0.0215099	0.253289	0.430441	0.879726	0.866092	0.999571	-0.455409	-0.0830515	1.969	0.950205	0.999931	0.0193199	-0.440904	1.22454	1.71274	0.707508	1.294	-0.882947	-1.01424	-2.43097	1.87132	-0.723277	1.31709	0.875737	-1.11567	1.02933	2.34417	-0.640532	-1.62832	2.08926	1.67372	0.39829	0.541529	0.799424	0.881678	2.64809	0.731588
Acvr1b	ENSMUSG00000000532	0.0608235	-1.88982	1.09533	0.929094	0.987426	0.0161456	0.221373	0.122476	0.770892	0.0401768	1.60969	-0.399513	0.994211	0.595504	0.789812	-0.919839	1.70594	1.12763	0.770141	3.02481	0.749912	-1.33986	-2.34659	-1.4167	2.01832	1.16327	2.36727	2.72867	1.26218	-0.175581	-0.928472	1.62527	2.62531	1.67597	1.07607	1.44355	1.15016	-0.044287	2.93563	2.32564
Tom1l2	ENSMUSG00000000538	0.402683	-1.77793	0.402312	0.471474	0.857773	0.0490065	0.433022	0.442708	0.999571	0.380594	-0.335314	-0.498878	0.942554	0.999931	0.682505	2.34294	2.15197	1.73375	1.68674	1.93472	2.09599	1.88851	2.72032	1.565	1.5802	2.00933	2.09298	1.9031	1.80601	1.73739	2.35324	2.63761	1.87144	1.43832	2.74845	1.7408	2.44426	2.21484	1.88627	1.46665
Gabra2	ENSMUSG00000000560	0.571452	-0.50024	-0.366106	0.385222	0.8156	0.642662	0.923455	0.524971	0.999571	0.147163	0.32566	1.7258	0.978926	0.999931	0.071593	0.122013	1.38559	0.862358	-0.749847	1.71472	1.02584	0.746852	-2.52817	0.6738	1.24348	-0.722065	-1.09746	-1.13611	1.75882	2.05196	1.52958	0.925232	1.65639	0.484549	1.51641	1.61076	-0.0673897	2.33578	1.8583	0.838361
Wdr77	ENSMUSG00000000561	-0.488821	-2.20916	-0.481137	0.483	0.863501	0.0194128	0.247895	0.505698	0.999571	-1.56805	-0.318992	-0.869277	0.558502	0.999931	0.533652	0.678799	1.90363	2.68372	-0.393167	0.477855	-0.143341	0.0445296	-2.5095	0.841205	-0.884179	-0.000242133	1.97265	-1.08957	0.268783	2.43961	-0.728776	-1.64897	2.59915	1.19489	0.889942	-1.62173	1.16161	-3.17032	-1.26094	-1.41371
Adora3	ENSMUSG00000000562	-1.32228	-0.552624	-0.0693855	0.0105702	0.16651	0.438381	0.880593	0.854968	0.999571	-2.22694	-0.98077	-0.411503	0.00838445	0.681688	0.81467	1.29399	2.17963	2.0366	1.25108	1.76432	-0.404231	1.63495	2.44301	1.85708	0.959295	2.15623	1.69745	1.56314	-0.595415	-0.714778	1.24025	1.56087	1.9767	1.44241	1.88305	-0.94965	0.0609642	-0.434787	1.54178	1.88078
Atp5f1	ENSMUSG00000000563	0.250801	-0.827757	0.693054	0.61825	0.914917	0.323072	0.849251	0.0714301	0.647493	0.623417	0.485677	-0.468328	0.825494	0.999931	0.558551	2.52649	1.51899	1.89762	1.68053	3.57049	1.69978	3.45821	3.54747	1.90737	2.08514	3.06392	3.01008	2.29639	2.75359	2.2081	3.69347	2.23879	1.9416	2.69387	3.97983	2.85966	1.68989	1.6395	2.38415	2.63867
Sox9	ENSMUSG00000000567	0.064504	0.686654	0.960095	0.937457	0.988263	0.435706	0.880593	0.199727	0.902324	0.493177	-0.194473	-0.657495	0.949436	0.999931	0.599557	0.416931	0.36165	0.92514	0.433315	2.14081	0.752943	0.348943	1.08469	1.42515	1.2602	0.68114	2.46497	1.26721	1.61747	1.66507	0.563049	1.89249	1.23299	0.362813	2.38277	1.45979	0.528389	2.76759	0.830639	2.38159
Hnrnpd	ENSMUSG00000000568	-0.223399	-0.631721	-1.22563	0.586937	0.905178	0.450778	0.884654	0.0086057	0.220516	-0.268401	1.04807	0.523274	0.93977	0.96341	0.802132	1.9127	2.08995	2.62934	1.9017	2.45917	2.04309	2.18456	2.29751	1.31476	1.52274	1.06705	1.47604	-1.71949	2.25378	3.47697	3.24132	0.824772	-0.565187	2.01286	0.95376	1.23705	2.08165	-2.95732	1.68862	1.12368
Dynlt1c	ENSMUSG00000000579	0.498222	-0.0932877	-0.235669	0.299513	0.771921	0.942168	0.984712	0.759432	0.999571	-0.728061	1.20161	-0.335936	0.883427	0.879312	0.820771	-0.999442	-2.97469	0.154515	0.47946	-0.593369	1.7738	-1.2559	0.385361	-3.59949	1.57406	-0.634576	-0.631646	0.0141974	-2.99077	-3.47142	-2.54853	-0.9494	-0.246608	-2.98267	-1.0889	-0.811527	-0.777605	-3.095	0.0958359	-2.75952
C1d	ENSMUSG00000000581	1.37661	0.837136	1.79138	0.0124982	0.183638	0.462023	0.888376	0.000477904	0.0339703	0.509046	0.159992	-0.782793	0.942554	0.999931	0.643525	-0.785321	0.430956	-0.321707	0.604917	3.1732	1.89347	-0.44411	0.43268	0.971143	0.514558	1.6452	1.13172	1.7414	0.0309117	2.59891	0.420318	1.26529	-1.97056	0.462856	0.855729	0.908811	0.463826	0.0742434	0.111374	2.02717
Krit1	ENSMUSG00000000600	0.232982	-0.159871	-0.142174	0.757385	0.951095	0.846065	0.967184	0.81436	0.999571	-0.704223	0.521714	-0.749938	0.932632	0.999931	0.34653	0.787401	0.741005	0.907245	-0.532866	2.3042	0.531484	1.43216	-1.95388	0.949734	3.10739	1.05283	0.805171	-0.290661	-0.23342	0.458659	2.60911	0.527151	0.500198	0.0595036	0.873681	2.16601	-0.500564	-0.196059	-0.668814	0.333974
Clcn4	ENSMUSG00000000605	-0.207296	-0.737946	0.231902	0.480679	0.863144	0.285538	0.84198	0.344786	0.999571	0.207579	0.218608	-0.618505	0.942554	0.999931	0.443897	2.71082	2.28645	3.07897	3.12658	2.91675	2.48576	2.66911	3.34988	2.38083	2.38299	2.85016	2.86145	2.74118	2.6564	2.03635	3.37833	2.52481	2.19321	1.86036	2.47246	2.07931	2.27093	2.29034	2.62144	1.70413
Hk2	ENSMUSG00000000628	-0.446167	-0.641398	-0.172888	0.142792	0.622516	0.350114	0.856465	0.504415	0.999571	-0.57044	0.826389	-0.174197	0.818771	0.985741	0.860196	2.74419	2.39663	2.90733	2.73719	0.689426	1.55612	2.9096	2.56312	1.60561	2.35423	1.97993	1.6894	2.23333	1.96367	2.32315	2.26743	1.89711	2.13391	2.97628	0.933114	2.54663	1.55688	3.10235	1.52408	2.75743
Myo18a	ENSMUSG00000000631	-1.2869	-0.123209	-0.448449	0.0402134	0.34553	0.907565	0.978479	0.56477	0.999571	-0.360524	1.38888	1.47567	0.957281	0.810988	0.220657	1.19344	1.51497	0.560512	0.827811	-0.105449	-0.608007	1.19901	0.724426	0.595521	1.85412	1.57585	0.566091	-0.60255	-0.260563	-0.306723	2.04451	0.7328	-0.0674176	0.395481	0.00506452	1.56701	1.02827	0.129783	1.4098	0.307795
Sez6	ENSMUSG00000000632	0.693496	0.480217	-0.0702408	0.273561	0.75159	0.685912	0.933575	0.902174	0.999571	1.01487	0.172175	1.09982	0.880482	0.999931	0.276507	-0.473697	0.21621	-0.290602	-0.268239	-0.0892559	1.48086	-0.609097	1.06912	0.435468	-2.52574	-2.5928	0.196305	-0.174476	0.829844	-0.64043	0.967895	0.284661	-0.0333485	0.32566	0.305884	0.568538	0.306565	2.03941	2.04107	0.224974
Cd52	ENSMUSG00000000682	-0.273343	-0.702971	0.0797986	0.140411	0.619344	0.15675	0.732963	0.551329	0.999571	-0.277827	0.851973	-0.347057	0.901136	0.678125	0.385215	3.03398	3.23208	3.10735	2.9711	3.08941	2.80416	2.82664	2.80033	2.51369	2.65249	3.37167	3.04554	2.99949	2.40818	2.78842	3.24535	3.47566	3.34316	2.93439	3.19461	3.36038	3.17523	2.68691	2.78014	2.82304
Hoxb6	ENSMUSG00000000690	-0.54153	0.358287	0.113569	0.375715	0.813702	0.4292	0.879019	0.771967	0.999571	-0.412173	-0.393992	-0.0154696	0.93977	0.999931	0.970077	2.9188	1.50294	1.54028	1.65745	1.8404	1.42635	1.43596	1.80564	1.88489	1.90294	1.91389	1.98659	1.70979	1.58003	1.83876	1.30182	2.311	1.78455	0.8806	1.80042	1.64385	1.71778	1.76035	1.96234	1.44894
Loxl3	ENSMUSG00000000693	-1.31554	-0.0581851	0.590426	0.0284354	0.293281	0.963085	0.989052	0.342091	0.999571	-1.08248	0.660922	-1.89997	0.795845	0.999931	0.0410034	0.5483	1.10495	-1.4268	0.621122	-1.13775	-1.17806	-1.57897	-2.64977	-0.0406696	-1.61576	0.842714	1.10521	0.928255	-0.804534	1.14807	-1.24147	-0.676941	2.41687	0.983437	-0.885209	1.42537	0.394771	-2.469	-3.0504	1.95194
Kat2b	ENSMUSG00000000708	0.522585	-1.03369	-0.906879	0.373553	0.812877	0.37889	0.865903	0.112517	0.744339	-1.34651	-0.0939921	0.555549	0.621966	0.999931	0.701898	1.39383	1.56481	1.31608	-0.571084	3.18264	1.83525	-0.953704	-2.41395	0.253427	1.40907	-0.12318	0.024726	-1.20593	-1.88549	-0.658382	2.69554	-2.10935	-0.40452	-0.694826	0.519135	1.30285	-0.301542	-2.78667	1.68725	0.124672
Rab5b	ENSMUSG00000000711	0.392328	-0.414574	0.345187	0.393504	0.81944	0.67419	0.931175	0.498504	0.999571	0.32061	0.223868	-0.442063	0.950205	0.999931	0.683418	0.176654	1.10868	2.56486	2.00897	2.7932	2.06734	2.01608	2.2128	1.7301	1.50346	2.10408	1.52947	2.44939	2.23711	0.0881437	3.49289	2.03144	1.90492	2.08902	1.83386	1.64945	1.46384	2.29536	2.14957	1.13446
Icosl	ENSMUSG00000000732	0.049643	-2.09794	-0.913627	0.942663	0.989299	0.00462416	0.0957293	0.063364	0.61471	-1.60278	1.09256	-0.307568	0.474462	0.950191	0.820384	-1.19876	0.732791	2.18047	0.5712	-0.301444	0.718968	0.0999433	1.01469	-1.50572	-1.02091	0.455943	-3.24937	-0.837304	-3.38496	-0.434973	2.0426	-1.54767	-0.677499	0.288027	1.2819	-1.51592	-1.44762	1.96589	-1.05249	0.879117
Spg7	ENSMUSG00000000738	-0.553688	0.543435	-0.239591	0.377103	0.814428	0.659388	0.928006	0.750524	0.999571	0.605265	0.237162	0.254283	0.943372	0.999931	0.904842	-0.533881	0.570659	-0.00746366	0.765621	-0.62164	0.199473	1.86973	1.62694	0.131772	0.196262	-0.0122444	-0.259774	0.316878	0.973078	0.394023	0.388062	0.94672	0.356481	1.08163	0.710699	0.340397	0.257075	2.06905	0.348104	-0.508499
Rpl13	ENSMUSG00000000740	-0.224849	0.0288362	-0.162349	0.341277	0.79848	0.921085	0.979902	0.508639	0.999571	-0.697465	-0.294607	0.321573	0.52259	0.999931	0.662671	2.65947	2.60993	2.65241	2.6069	2.28611	2.55366	2.63389	2.97759	2.67753	2.65317	2.52544	2.57124	2.63193	2.4681	2.086	2.33149	2.57142	2.9284	3.01444	2.40142	2.66798	2.8076	2.74653	2.85233	2.37269
Chmp1a	ENSMUSG00000000743	0.0196562	-0.943439	0.583331	0.976402	0.99501	0.201952	0.795365	0.243214	0.946828	0.247119	0.928885	-0.189553	0.972444	0.999931	0.91712	1.38855	0.97517	-0.691731	1.07171	0.22408	1.09106	0.970506	-2.13112	-0.464373	-0.107172	0.974171	1.44655	2.80612	1.30246	0.774998	0.0646447	-0.524383	2.87295	0.958413	1.8057	-0.451519	0.209478	0.965493	2.74383	0.964694
Rpa1	ENSMUSG00000000751	-0.822797	-0.472358	-1.05213	0.242865	0.729689	0.69987	0.93611	0.150331	0.813107	0.181464	-0.213823	1.34325	0.982164	0.999931	0.321874	0.250087	1.2682	-0.310607	1.5301	-1.20674	0.0978087	-1.41111	-2.3038	-0.594109	0.38828	-0.758936	-3.24007	-2.14048	-0.266272	-1.4284	0.969637	-0.367365	1.9984	-0.757461	-1.37676	-0.748413	-0.902552	0.0392678	0.726889	1.15708
Tubgcp3	ENSMUSG00000000759	-0.770933	1.36156	-0.382654	0.160609	0.643362	0.110903	0.651133	0.650604	0.999571	-0.509039	-0.201514	-0.226773	0.949635	0.999931	0.923858	-0.0198595	1.84695	0.305852	2.27143	2.31425	0.136279	1.11966	2.55046	2.42777	0.919233	0.80547	-0.112784	0.577009	0.399656	0.267989	0.73702	0.867846	0.50077	2.7091	0.214406	1.53754	0.221674	-0.610174	0.288466	0.174872
Tcf7	ENSMUSG00000000782	-0.139133	1.12112	0.0597209	0.750958	0.951095	0.279951	0.84107	0.875614	0.999571	1.50447	0.413285	-0.273235	0.121614	0.999931	0.817993	-1.59682	-2.96575	-0.968908	-2.05523	-1.12158	-3.5115	0.301468	-1.80474	-0.307947	0.519706	-0.738016	-3.50692	-1.81662	1.44213	-1.14282	-2.0129	-0.118545	0.911362	1.03581	-0.672235	0.00274198	-1.376	-0.983285	-2.21875	0.336266
Ddx3x	ENSMUSG00000000787	-0.126575	0.407758	0.183427	0.679061	0.932914	0.290117	0.842733	0.599597	0.999571	0.0650314	-0.377748	-0.71164	0.983283	0.96001	0.449673	2.47453	1.98976	2.33992	2.39828	2.31697	2.28001	2.43448	2.58192	2.98727	2.722	1.59883	2.89151	2.09399	2.74129	2.45171	1.78633	2.04694	2.92505	2.37027	2.93483	1.92536	2.31225	1.85157	1.96266	2.34684
Il12rb1	ENSMUSG00000000791	-0.0740802	0.491949	1.15559	0.888037	0.977293	0.673145	0.931035	0.0435425	0.524649	1.22706	0.263927	-0.789744	0.796453	0.999931	0.326726	0.58677	-0.266297	-1.49232	-0.771586	1.22622	-0.912591	0.662016	-1.82427	1.00985	1.5227	1.05177	1.09629	-0.0113982	0.453862	0.676416	2.60266	1.86464	-0.604929	0.716809	1.37342	1.10345	0.846643	-0.635535	-0.411074	0.501804
Usp32	ENSMUSG00000000804	-0.128862	0.0819329	-0.356051	0.836636	0.96928	0.944783	0.984712	0.661046	0.999571	0.548144	-0.0298123	-0.113771	0.942554	0.999931	0.9532	0.441923	1.14718	0.159681	2.64879	0.146558	0.823637	0.837192	1.34408	0.688951	0.914943	0.64753	0.4437	1.18891	0.858042	-0.18928	0.240973	0.727125	1.71628	1.29017	-0.0518477	-0.629947	0.328191	-0.939676	0.688217	0.865928
Car4	ENSMUSG00000000805	0.0337164	-0.739819	0.276238	0.954322	0.991499	0.522353	0.898027	0.53013	0.999571	0.79368	0.560532	-0.96341	0.880966	0.999931	0.233007	1.05939	1.76218	1.17864	2.41756	2.09693	2.02566	1.5842	1.01128	1.12693	1.83051	2.33456	1.65053	2.9661	2.23384	1.74312	1.64677	1.57568	2.51555	2.11968	2.23148	1.70688	1.67146	3.03427	1.75606	1.22896
Dnajc5	ENSMUSG00000000826	0.0443123	0.733708	0.0267824	0.913234	0.984529	0.178482	0.763766	0.956095	0.999571	-0.400653	-1.13056	0.0854576	0.943372	0.479884	0.943436	2.14125	1.93236	1.69353	1.78576	0.739802	1.75089	2.35884	3.09563	2.67269	1.83476	1.35342	1.87222	2.23014	1.45934	0.641356	1.54803	2.14991	2.38262	2.3411	1.6379	1.7215	1.81137	2.65206	2.43405	2.67022
Tpd52l2	ENSMUSG00000000827	0.739039	-0.88741	0.258589	0.169701	0.654892	0.457159	0.88729	0.707398	0.999571	0.489667	2.34385	-0.784776	0.937067	0.300765	0.35507	0.0404107	2.02785	0.534648	0.485828	0.548641	1.66738	3.02357	0.67234	0.6003	1.4331	1.84347	0.2989	2.44523	2.38135	1.10358	1.07032	0.92157	1.59616	2.34551	0.553955	2.73428	1.0833	2.02732	1.17064	2.06828
Fmr1	ENSMUSG00000000838	-0.18549	0.100932	-0.0202233	0.779381	0.954886	0.935806	0.983483	0.977479	0.999589	0.136488	-0.0353771	-0.663214	0.986046	0.999931	0.541688	1.102	0.211126	-0.228195	0.85682	1.71825	0.372841	0.667494	1.3879	0.148884	1.86423	1.81603	-1.04151	2.08817	0.686644	-2.31562	0.769868	2.07266	0.418483	-3.01101	0.118489	0.25162	-1.19023	-0.411145	0.983815	1.5815
Bcl11a	ENSMUSG00000000861	-0.281111	-0.386459	1.01003	0.733004	0.948841	0.727101	0.944462	0.0998845	0.718441	0.151072	0.559876	-1.87633	0.984923	0.999931	0.0324145	-0.504611	1.14279	-0.480661	1.18345	1.53531	0.0914717	-0.0938878	-2.33301	0.299895	-0.449935	1.26871	1.64026	1.85456	0.314995	2.04826	-0.221743	0.524065	2.49174	0.459345	1.28789	0.343219	-0.856695	-0.651663	-2.02526	1.77501
Pxmp4	ENSMUSG00000000876	-0.267327	0.0937068	-0.460363	0.677118	0.93269	0.942567	0.984712	0.487133	0.999571	0.2671	0.228493	-1.69669	0.974377	0.999931	0.258825	-0.342327	-0.368779	-0.388257	-0.810156	0.0961708	-0.696204	-0.265197	1.21386	-0.367499	0.352049	-3.27936	-0.375801	0.285534	-0.277767	-1.98044	0.993886	2.24886	-2.15947	1.07179	-0.2207	-0.444039	0.447807	-3.03125	-2.32008	-0.0755918
Dlg3	ENSMUSG00000000881	-0.892604	-0.51741	-0.595611	0.226745	0.716067	0.637792	0.922883	0.353061	0.999571	0.168128	0.163791	-0.993454	0.972444	0.999931	0.579326	1.77072	1.06051	1.23359	1.36474	0.906364	0.61493	-0.649908	-2.64295	0.354361	1.4878	-3.3004	2.4558	1.40204	1.92318	1.64275	-1.08929	0.158297	2.30581	1.39075	-0.32622	0.486087	-1.28651	1.15491	0.80091	2.16753
Smarcb1	ENSMUSG00000000902	-0.0306756	-1.42109	0.301331	0.956834	0.991499	0.22201	0.808768	0.586354	0.999571	-0.216876	0.0311997	-2.7195	0.969437	0.999931	1.2386e-06	-0.650811	2.2144	1.19498	1.00787	0.546947	1.5203	-1.44606	-2.73464	-0.269125	0.844088	1.71991	1.60287	2.73989	1.26257	2.24925	2.28595	1.13702	-1.22552	-0.806674	-0.204659	0.227963	3.45377	-0.114237	-2.08422	0.191651
Vpreb3	ENSMUSG00000000903	1.0133	-1.10493	0.706237	0.0536761	0.403481	0.337435	0.852804	0.285913	0.976917	0.248204	0.210957	-0.873478	0.969165	0.999931	0.601713	1.89332	1.58155	1.31134	0.903784	2.32893	2.3316	1.66665	2.65853	1.80546	2.042	2.05559	1.36845	2.77944	1.85996	-0.0934273	0.181594	1.81189	2.31303	-0.373464	1.65398	1.85332	1.32345	1.46369	2.10567	1.13542
Nsun5	ENSMUSG00000000916	0.221399	-0.064755	0.344471	0.715807	0.944271	0.94965	0.986435	0.648545	0.999571	-0.667054	-0.0508917	-0.874816	0.941671	0.999931	0.65933	1.68368	1.76625	-1.60103	1.29586	-1.92826	1.30688	1.94487	2.55788	1.15907	3.10872	1.69826	-0.225433	2.61239	0.0285701	-0.421053	-1.07901	1.646	1.9798	1.57755	1.07931	1.03437	2.64164	0.774941	-1.00008	1.42334
Mmp14	ENSMUSG00000000957	-0.210115	-0.641236	0.210461	0.616005	0.914101	0.514786	0.89666	0.410483	0.999571	-0.039926	0.10681	-0.655367	0.992725	0.999931	0.433143	2.50245	1.90578	1.4555	2.27864	2.06225	1.6832	2.36643	1.84219	1.59715	2.23323	2.4314	2.42139	2.3259	1.69133	2.11848	1.83442	2.4018	2.32424	2.035	2.33895	1.63121	1.50992	1.43486	1.96148	2.18388
Slc7a7	ENSMUSG00000000958	-0.803849	-1.84139	-1.2616	0.147064	0.624464	0.0467557	0.42452	0.0757289	0.663419	-1.46182	0.814181	0.552481	0.498793	0.999931	0.808912	1.21902	1.66301	2.9109	0.869371	0.118082	0.810865	-0.252367	-2.34873	0.591125	-1.0837	-0.33837	1.88137	-1.64848	-0.210816	2.51219	2.40722	0.737784	2.43369	1.59633	0.630579	0.498817	0.910099	2.05785	1.55521	0.42087
Oxa1l	ENSMUSG00000000959	-0.551984	-0.58995	-0.770027	0.487005	0.865938	0.586403	0.913383	0.2802	0.976678	-0.027651	2.36916	-0.84967	0.994901	0.258912	0.659145	2.21432	0.827055	1.41911	0.197951	1.3601	0.153188	0.52499	1.37245	0.837024	1.32426	-3.13175	2.02337	1.39315	1.83958	-1.67233	0.934775	0.99364	2.07206	1.75709	0.950518	3.52905	0.378445	0.740797	1.46879	1.21916
Heatr6	ENSMUSG00000000976	-0.368178	0.992004	0.796635	0.556006	0.893428	0.363878	0.862993	0.321299	0.993814	0.653004	0.838559	-0.272252	0.93977	0.999931	0.901074	-3.12797	-0.58086	-0.409209	1.35264	2.03919	-0.140252	-1.12154	1.2501	-0.519967	1.28038	2.37561	-0.659106	0.718096	0.42977	0.448622	-1.38364	0.840259	-1.43553	-0.281983	0.280012	1.18789	1.07175	-0.609978	-0.28427	0.142017
Ccl3	ENSMUSG00000000982	-1.33125	-1.1326	0.39108	0.00235262	0.071578	0.308248	0.846056	0.379196	0.999571	0.125485	0.410267	-0.7709	0.981501	0.999931	0.608799	2.2841	1.91974	0.987622	1.89163	0.941356	-0.217682	2.00773	2.12122	0.998408	0.847212	1.34632	2.62961	1.72542	2.11627	1.67996	1.31862	3.0013	1.34355	2.36812	1.01681	0.921446	1.36749	-0.260869	1.62752	2.22341
Ilf2	ENSMUSG00000001016	0.662964	0.106429	-0.811199	0.289189	0.765703	0.927038	0.981946	0.248148	0.950228	0.598017	-0.0354575	0.0114811	0.935107	0.999931	0.9965	1.16283	-0.276472	1.38622	-0.0552047	2.22929	2.02731	-0.354845	0.895826	0.627111	1.07601	-3.1527	-0.711467	1.36538	1.91344	-2.20538	0.88311	1.51778	1.83581	-0.213769	1.50181	0.971874	0.188745	1.19873	0.923546	-0.229914
Chtop	ENSMUSG00000001017	0.056421	-0.229268	-0.237858	0.890971	0.977711	0.624488	0.921059	0.568345	0.999571	0.128085	-0.137199	0.970357	0.972444	0.999931	0.321057	0.416137	2.05009	1.61379	1.71563	1.68641	1.81282	2.75433	1.05693	1.4175	2.45758	2.23838	0.341544	1.11399	1.81887	0.95021	2.73988	1.02214	1.7774	2.28769	2.30181	0.604866	1.34583	2.04137	3.01805	1.56018
Snapin	ENSMUSG00000001018	0.0914178	-1.15641	-0.345583	0.86851	0.973822	0.26685	0.839291	0.417917	0.999571	-0.0770097	2.58362	1.21067	0.988647	0.16353	0.365637	1.91566	1.64058	1.30239	0.853618	0.744433	1.407	1.89236	0.935372	0.864713	1.0581	1.76662	0.0496013	-0.589928	0.597483	1.51787	2.62336	1.01018	1.34695	1.85244	0.76161	2.39677	1.36163	1.11602	1.23952	0.91286
S100a4	ENSMUSG00000001020	-0.167154	-1.99586	0.599732	0.793851	0.957791	0.00654147	0.121263	0.329917	0.997295	-0.455966	1.8182	-0.950834	0.951016	0.437893	0.179479	0.308183	1.34693	1.32348	1.20895	-2.7863	0.686589	2.08188	1.03638	-1.35726	1.71562	2.06606	2.07885	-0.60348	0.874135	3.03454	-0.704609	1.44404	2.0803	1.45279	0.735405	1.31965	3.08343	0.884946	-0.837072	0.513993
S100a6	ENSMUSG00000001025	0.340756	0.0886685	1.36052	0.622407	0.916743	0.942418	0.984712	0.00356853	0.134035	0.676154	0.0860099	-0.680391	0.923641	0.999931	0.65933	1.65748	-0.303882	1.47251	1.34288	2.3584	1.20763	1.09177	3.48928	1.61256	2.4541	2.60856	2.17163	2.60078	1.54906	-0.33838	0.0211632	2.4131	2.31067	1.35461	2.29771	1.54553	2.29791	0.72181	2.37228	1.23528
Epn2	ENSMUSG00000001036	0.118983	0.200465	1.53395	0.865539	0.97317	0.860317	0.969757	0.0208952	0.358855	0.0349048	-0.387724	-1.72686	0.995548	0.999931	0.0425246	-0.0310908	1.12451	-2.21612	-0.245496	-0.435257	-0.0232595	0.244	-2.49253	1.47989	-0.968604	2.18878	2.03272	1.55055	0.543913	2.23363	-0.797052	0.815995	1.97094	-0.193919	-0.20345	1.89802	0.497994	-0.045976	-1.69738	-0.9238
B9d1	ENSMUSG00000001039	-0.338485	2.2428	-0.258051	0.35176	0.802879	3.44864e-06	0.000290265	0.63472	0.999571	-0.349261	-1.83509	0.0962194	0.949635	0.353589	0.960269	-0.283913	-0.538191	-0.80659	-1.06031	0.842643	-0.717284	-2.50158	-3.08688	1.31182	-2.50617	-0.498437	-2.96109	-0.223378	-3.00644	-2.809	0.410659	-0.549267	0.0577596	-0.389401	-2.69963	-0.639857	-2.2725	-0.580987	-0.432057	-0.858097
Sec24b	ENSMUSG00000001052	-0.490024	0.252489	0.269303	0.41756	0.831116	0.769135	0.954252	0.478204	0.999571	-1.74742	-1.38059	-0.820638	0.140619	0.606519	0.623341	1.19818	2.06081	-0.354174	1.09043	-1.13616	1.14792	0.833621	-1.88577	0.703965	2.1494	0.325178	2.72328	2.34999	-3.57643	-1.5557	2.5823	0.635378	-1.0614	-0.349798	-0.227338	-0.93175	0.663722	-0.476624	1.59368	0.0447089
N4bp3	ENSMUSG00000001053	-0.634538	-0.780023	-0.647782	0.0733905	0.470409	0.440138	0.880775	0.151944	0.816593	0.398728	-0.294939	-0.183888	0.953849	0.999931	0.860196	-0.587127	1.91753	1.10834	0.264073	1.18654	-0.382223	-2.66675	-2.90129	1.51434	-1.48653	-2.63772	-3.06349	-1.58099	2.14804	2.27746	-1.58605	1.81547	1.27286	1.76016	-1.22715	-1.4742	0.941323	1.26089	-1.59365	-2.06592
Rmnd5b	ENSMUSG00000001054	-0.237831	-0.113717	-0.47562	0.764766	0.952354	0.929194	0.982418	0.498139	0.999571	1.22113	0.083522	0.208424	0.807136	0.999931	0.886896	-3.13613	0.900136	-2.26867	-0.452555	-2.23421	0.0295562	1.64963	-2.764	-1.33014	-1.1342	-1.19723	-3.07756	-0.190349	0.847946	-4.09189	1.11966	-0.861435	1.91281	0.101759	-1.58676	-1.64845	-1.1232	-2.80924	-0.492686	-1.71001
Nhp2	ENSMUSG00000001056	1.07593	0.050258	0.173948	0.0345084	0.3209	0.962511	0.988946	0.830291	0.999571	1.21869	0.213468	0.354839	0.741139	0.999931	0.844932	0.676296	-0.439596	-0.282102	-2.65726	-0.298673	2.02322	0.114911	0.347811	-0.0123023	-2.41311	1.72081	-2.83299	0.435976	2.17674	0.780663	-2.55447	-2.95021	0.16467	-2.81585	0.558685	0.175113	2.29784	-2.88431	0.657387	-0.349276
Vps9d1	ENSMUSG00000001062	-0.89151	-0.501545	-0.916295	0.204158	0.695248	0.604849	0.916973	0.182352	0.871405	-0.0101214	-0.290596	1.48617	0.998131	0.999931	0.218801	-0.0724405	1.75868	1.25042	0.792073	-0.146724	-0.352703	1.48704	1.20522	0.81032	0.859133	-0.134165	0.2675	-1.18038	0.272634	1.26387	2.31123	2.13424	-0.58607	2.00808	0.635367	0.360693	0.636786	2.06227	1.01948	1.39037
Mfsd10	ENSMUSG00000001082	-0.522661	1.76855	-0.081231	0.516242	0.877603	0.0309492	0.334465	0.910503	0.999571	0.118629	-2.54037	0.304656	0.986046	0.0110424	0.810193	-0.675685	1.91144	-0.618093	0.578295	0.715818	0.364273	-1.36286	-2.31756	2.43415	-1.13824	-3.12942	1.18442	1.35433	1.25442	-2.08124	-1.00774	0.142304	3.05976	-0.718249	0.0447562	-0.412827	-0.272509	-0.253194	1.78121	-0.254481
Luzp1	ENSMUSG00000001089	-0.512685	-1.92354	-0.410564	0.49359	0.867602	0.0334989	0.350523	0.605924	0.999571	-1.04933	1.6706	-0.636583	0.82354	0.609737	0.739092	-0.102925	1.91484	1.49747	0.31621	0.405704	0.0986599	0.586842	2.83685	0.337569	-1.28044	0.0350454	2.13494	1.07523	0.75755	-1.44999	1.60898	2.74549	1.32172	-0.455997	0.836108	1.68026	1.22212	0.602373	0.857097	0.987245
Slc13a2	ENSMUSG00000001095	-0.365715	2.37532	0.0913677	0.347525	0.80193	6.61132e-06	0.000498269	0.880938	0.999571	-0.263681	-2.9068	-0.289628	0.957281	4.94035e-05	0.873933	-0.863284	-0.464713	-0.0909471	-0.298187	0.571681	-0.674709	-1.13416	0.491524	0.702642	-0.879715	-0.58563	-0.49972	0.274278	-0.344085	-0.759969	-0.880686	-0.847513	-0.934905	-0.319234	0.084336	-0.835727	-0.247232	-0.265396	0.0868941	-0.298344
Poldip2	ENSMUSG00000001100	0.556528	0.465738	0.230238	0.429309	0.836827	0.708772	0.939079	0.729079	0.999571	0.442789	-0.53966	-1.87733	0.94736	0.999931	0.133789	0.142442	-0.446132	-0.158742	0.238541	-2.08021	0.986653	1.4147	-0.431589	-0.36376	-0.566746	-0.483494	0.928933	-0.481788	-0.370607	1.08499	0.394908	-0.0231246	-0.267162	0.28972	-2.36299	-2.43019	-1.61437	-2.51458	-2.67989	1.00914
Ift20	ENSMUSG00000001105	-0.560816	-0.189957	-0.0323329	0.323642	0.784827	0.78265	0.957974	0.936157	0.999571	-0.0328055	-0.19802	0.0853101	0.992194	0.999931	0.959821	2.2969	2.0165	2.04181	2.07904	2.10189	0.968978	2.0849	2.20929	1.72645	1.75676	2.35352	0.895278	1.86368	2.35243	2.06116	1.77776	2.57741	1.24201	1.07633	1.35919	1.49655	1.27058	1.44607	1.74248	2.11285
Lgals9	ENSMUSG00000001123	0.295555	1.08382	0.129927	0.692765	0.938956	0.193097	0.783188	0.863742	0.999571	0.392163	-1.70876	0.00848156	0.953638	0.326522	0.997071	1.46804	1.62021	0.463698	0.845631	1.78064	1.10924	2.00715	0.758522	2.67043	1.81628	1.80711	-0.365984	1.67411	1.72889	1.34928	1.05888	1.14766	1.19077	2.33513	0.553225	0.612654	0.261913	1.92758	1.23655	1.84389
Araf	ENSMUSG00000001127	-0.351828	0.703994	0.454174	0.513406	0.877094	0.257852	0.833395	0.335191	0.999571	0.736945	-0.950295	-0.42334	0.736023	0.795958	0.703666	1.18118	1.64713	1.3234	2.28127	1.29351	1.83469	1.04671	0.430432	2.29399	1.23059	1.41181	3.01718	1.2647	2.19356	2.97406	2.90545	1.60936	1.06241	1.48053	1.27197	1.28092	1.79164	2.55625	1.58708	2.15005
Cnnm3	ENSMUSG00000001138	0.293905	-0.592306	-0.652796	0.651826	0.928728	0.626859	0.921059	0.377263	0.999571	-0.987995	0.10622	1.20533	0.889274	0.999931	0.413275	0.400487	0.492749	1.5061	0.5512	1.85036	1.20312	0.597254	0.529669	0.977551	0.263096	0.850438	-0.0728013	0.280155	0.899434	0.461504	0.324789	-0.0644074	1.24574	0.571457	-0.119879	0.904813	-0.530735	0.502149	1.44384	0.934125
Lman2l	ENSMUSG00000001143	-1.25047	0.243617	-0.479747	0.0519142	0.395391	0.823003	0.963813	0.538017	0.999571	0.446437	-0.169163	0.118999	0.950205	0.999931	0.960269	1.842	0.370873	0.0212484	1.84667	0.355682	0.322171	-0.00697299	1.03293	-0.32499	1.97227	0.195914	-3.13788	1.08661	1.41592	1.01538	-0.94794	0.116942	-0.801881	0.448019	-0.102046	-0.110692	0.575891	-0.701502	0.211678	1.52112
Pcnt	ENSMUSG00000001151	-0.873647	-0.106953	0.256936	0.164484	0.647274	0.896795	0.976773	0.543212	0.999571	-0.756765	-0.0442627	-1.27214	0.92231	0.999931	0.404618	1.73065	0.632194	2.41213	1.70401	2.51178	0.545739	1.2876	1.55944	1.23517	2.0558	1.48093	2.10692	1.91693	0.377579	-0.57763	1.54103	1.23219	2.07047	1.5599	1.35848	1.01184	0.61126	-0.524492	1.32484	0.202668
Ftcd	ENSMUSG00000001155	-2.09753	-1.9918	-1.64439	2.89157e-08	3.70474e-05	0.00394944	0.0852828	0.00586437	0.178894	-1.97931	1.11482	-0.282392	0.0584848	0.773161	0.775201	1.19333	1.52713	1.90962	1.04408	-0.736878	-3.14959	-0.608071	0.63852	-2.11797	-1.26971	0.976776	-3.16352	-1.75547	-3.11639	-1.54431	-1.18286	-2.14442	2.00007	-0.864841	-0.0728004	0.331745	-1.89126	-1.00541	-1.88367	-1.80899
Mxd1	ENSMUSG00000001156	0.634759	-0.181454	-0.36757	0.3394	0.796584	0.888435	0.975764	0.585669	0.999571	0.297785	-0.592144	2.53135	0.957281	0.999931	5.52588e-08	0.441187	0.37674	1.43999	-0.421901	0.502885	0.933103	0.65942	1.07527	0.671355	1.40762	1.26616	-3.31085	-0.672002	1.61789	-0.197574	-0.427969	0.639801	-0.306284	0.563619	0.254189	-1.47388	2.19396	-1.00443	3.16051	0.585847
Snrnp27	ENSMUSG00000001158	-0.0198137	0.204068	-1.07546	0.977135	0.99501	0.499423	0.893033	0.0140451	0.285357	-1.07783	-1.72543	-0.853188	0.564651	0.536587	0.346102	0.107917	1.81485	1.89987	-0.236633	2.0578	0.377568	0.415312	-2.39875	2.50193	1.79217	0.865881	1.80126	-1.07679	1.10326	2.31955	-0.448441	0.586167	2.79449	-0.554433	-0.166613	1.72644	-0.527858	0.054022	-1.30001	0.962002
Oas1c	ENSMUSG00000001166	-1.18446	-0.912076	-0.113104	0.0127198	0.185896	0.238536	0.823218	0.856879	0.999571	-0.506726	0.328095	-0.332404	0.943372	0.999931	0.889606	-1.00777	1.61004	-2.52278	0.705665	-2.89407	-3.272	-2.42895	-2.67805	-2.43353	-2.93846	-3.25789	2.25131	-2.05941	-0.933602	-1.83148	0.45184	0.84979	0.832252	-0.532578	-0.0429989	-2.44261	-0.480544	-0.699267	1.10553	-1.13788
Ocrl	ENSMUSG00000001173	0.773683	-2.94316	-0.779079	0.0582732	0.421495	1.89439e-09	6.38268e-07	0.0692562	0.640412	-0.767253	1.66271	-0.329624	0.806512	0.537941	0.741972	-0.874374	1.81737	2.61253	-0.506231	-0.370843	1.77526	1.4508	0.965889	-1.25091	-0.720404	-3.00659	-0.362328	-0.842312	1.76674	2.40433	1.97948	1.84093	-0.777867	1.85746	1.20776	0.892062	1.4627	2.11294	-1.00158	0.428432
Calm1	ENSMUSG00000001175	-0.00379178	0.443843	0.219588	0.975541	0.99501	0.0916059	0.599154	0.0503793	0.556844	0.0324756	-0.0817126	-0.0375367	0.982164	0.999931	0.867871	3.61173	3.46873	3.39672	3.72781	3.83919	3.85334	3.6787	3.59094	3.70743	3.46202	3.83426	3.45786	3.5081	4.10648	3.84411	3.87379	4.11404	3.82021	3.51883	3.542	3.85112	3.61335	3.97792	3.72058	3.55309
Agpat3	ENSMUSG00000001211	0.651948	-0.510235	-1.07932	0.106871	0.551873	0.530463	0.899319	0.0434347	0.524445	-0.649312	0.699377	2.2177	0.874469	0.999931	0.00544709	1.27991	1.3599	2.04352	1.28153	2.43776	2.31017	1.65963	1.58277	1.61537	1.71709	1.04874	1.9581	0.896352	1.82324	0.95787	2.92183	1.72709	1.88179	1.86332	1.93241	2.12512	1.60143	1.50249	2.21069	1.36146
Slc26a3	ENSMUSG00000001225	-0.525967	-0.44302	0.31277	0.255813	0.73746	0.456556	0.886877	0.603384	0.999571	-0.428828	1.59997	-0.0526251	0.929134	0.47609	0.979122	-0.482476	0.341522	-2.53824	-0.352468	-0.703754	-0.267067	-2.69389	-2.88016	-2.5069	-1.99419	-0.947286	-3.05174	0.706294	-3.02501	-2.33653	-1.97073	-0.428383	1.30461	-0.264095	0.0412075	0.430401	-0.213097	0.38115	-0.179577	-2.176
Dpp9	ENSMUSG00000001229	-1.82438	-1.73791	-0.198116	8.6851e-05	0.00827668	0.0300092	0.326449	0.797268	0.999571	0.269256	1.79799	-1.57761	0.966898	0.390775	0.37361	-0.398033	0.941409	1.17499	2.76819	-1.72954	-3.43304	-0.79607	1.96975	-2.32529	-0.0412099	1.10355	-2.92261	1.59978	1.26193	-2.10361	0.218987	-2.31683	0.935683	1.23834	-0.0302853	0.482191	0.841406	0.305309	-2.19466	-0.268162
Ramp2	ENSMUSG00000001240	0.304622	2.17519	0.849703	0.645627	0.926383	0.00429675	0.0905774	0.14635	0.807075	0.85731	-0.934811	-0.259269	0.909596	0.726367	0.844031	-0.129342	0.688359	0.856374	2.073	1.43374	1.75814	0.622203	2.81972	3.40753	1.00443	2.60455	1.36421	1.51296	1.41638	1.36823	1.02021	1.30294	1.03911	1.97652	0.965604	1.80304	2.78401	1.34456	1.25235	1.84516
Lsr	ENSMUSG00000001247	-0.472856	1.10516	0.662225	0.514225	0.877246	0.143299	0.716249	0.303535	0.988677	0.433326	-1.44639	-0.88189	0.942554	0.461626	0.349904	0.703567	1.92743	1.5295	1.0112	1.77811	0.16122	1.00721	1.45459	2.58789	1.2318	1.86524	1.95465	2.15356	2.11754	0.850375	2.0341	2.8297	1.79924	1.8978	1.63476	1.76741	2.18976	2.44399	0.578468	1.68572
Gramd1a	ENSMUSG00000001248	-0.139481	-0.648761	-0.197153	0.831674	0.968011	0.505794	0.894019	0.633738	0.999571	-0.300848	0.0918996	-0.262145	0.942554	0.999931	0.885684	2.14874	0.596364	2.4127	-0.709793	1.17147	0.575583	1.01205	-2.70746	-0.147525	0.885834	2.37567	1.23606	0.862326	1.46875	1.78231	1.53107	2.69706	1.90183	1.66758	-0.49071	-0.141079	1.28661	-0.528151	1.43447	1.1666
Ckb	ENSMUSG00000001270	0.113888	0.362776	-0.0783579	0.789382	0.957791	0.45502	0.885847	0.870122	0.999571	0.0615227	-0.295268	-0.449942	0.984764	0.999931	0.605812	1.32203	2.44666	1.85074	1.78457	2.63106	2.15411	2.16118	2.28409	2.58803	1.52555	1.45579	2.09309	1.94157	2.44155	1.4448	2.29843	2.99553	2.40266	1.77766	1.81833	2.36481	1.54252	1.95932	1.69859	2.05829
Sp1	ENSMUSG00000001280	0.439327	-0.726634	0.74391	0.351591	0.802801	0.463957	0.888383	0.123167	0.773129	0.391113	0.102536	-0.752905	0.953849	0.999931	0.527837	1.12016	1.26899	1.42666	1.70101	1.30076	2.33381	1.80695	2.04235	1.5131	1.91677	1.77037	2.18381	2.04986	1.35686	1.18867	1.84202	1.72518	2.03679	2.09764	1.61911	1.82014	1.52465	1.66186	1.88758	1.85676
Rarg	ENSMUSG00000001288	-0.166228	-0.0876213	0.236349	0.787797	0.957791	0.898779	0.977442	0.609788	0.999571	0.120775	2.99422	1.01409	0.972444	0.00327474	0.416786	0.522554	-2.95604	-2.33897	-0.69426	-0.712075	-0.197698	-0.385372	1.1082	1.23595	1.56172	-0.383353	-3.17158	-1.88573	-3.06802	-1.6851	-1.49685	0.137844	-1.55015	0.652588	0.0548066	0.294975	0.0186223	0.379049	0.566977	-2.18655
Pfdn5	ENSMUSG00000001289	-0.17317	0.327831	0.155626	0.69552	0.939826	0.626998	0.921059	0.755699	0.999571	-0.0226231	-0.16975	0.722092	0.995607	0.999931	0.707857	1.86097	1.16844	1.7878	2.45138	2.44357	2.20868	1.20491	3.11791	2.34033	1.67848	2.10907	2.34154	-0.261904	1.49931	2.70639	1.58409	2.75055	2.02301	2.80149	2.01114	1.84445	2.789	-0.362393	2.26865	2.18289
Efnb2	ENSMUSG00000001300	1.08904	1.44002	-0.0187183	0.0607572	0.430075	0.0725301	0.53135	0.955091	0.999571	-0.152431	-0.581494	0.799933	0.956375	0.999931	0.565666	-3.7304	-2.93064	-1.57043	-0.932329	-0.632672	1.4151	-2.21341	-1.90951	-0.047283	-1.18518	-3.29325	-0.92538	-2.92218	-3.29523	-2.33349	-0.949786	-0.653211	-1.01104	-3.13946	-1.40824	-0.692974	-3.05366	0.703387	0.32773	-0.473592
Rrp15	ENSMUSG00000001305	-0.593803	-0.438696	0.43486	0.115267	0.573117	0.707495	0.938621	0.590719	0.999571	-0.728898	0.4384	0.0662247	0.909596	0.999931	0.980076	-0.575559	-0.0617302	-0.4996	-1.40954	-0.0426079	-3.20196	-1.13548	-2.83959	-0.516433	-0.993756	1.04696	-0.493417	0.868169	-0.8522	0.988544	-0.909994	0.678227	-0.798176	1.87851	-0.173479	-0.646114	-0.839159	2.74715	0.347453	1.41162
Fndc5	ENSMUSG00000001334	0.463722	-1.184	-0.0247346	0.52956	0.883954	0.129711	0.693737	0.964451	0.999571	0.37543	1.48248	0.522772	0.954602	0.561878	0.769482	-0.715344	0.0497493	0.619476	-0.0271497	1.07933	0.636321	-0.181366	1.81385	-2.19518	-1.2631	-3.24543	0.185244	-1.81865	1.1901	-1.59026	-1.14297	1.23176	1.89666	0.0212614	0.305776	0.577146	-1.40683	-3.07776	1.41174	1.34373
Acp5	ENSMUSG00000001348	-0.30599	-1.28438	-1.14875	0.559864	0.894279	0.229619	0.8167	0.0243169	0.387979	0.16535	0.761832	-0.159252	0.974377	0.999931	0.928736	1.32994	2.34544	0.470697	2.19825	0.149849	1.17655	2.4222	3.00588	0.571645	1.71046	-1.00415	-0.26257	1.84071	1.65473	-1.44134	-0.439641	0.800932	2.35195	1.25075	0.343477	0.772267	-0.259065	-0.575308	1.43835	1.28129
Fbxo9	ENSMUSG00000001366	0.997013	-0.0587501	1.04768	0.0632571	0.436134	0.931586	0.982807	0.109263	0.736773	0.197786	-0.0223408	-0.503395	0.95739	0.999931	0.69477	0.317884	-3.04281	-1.6682	-0.792739	-0.656273	1.16663	-0.020099	-1.83523	-1.35496	2.41816	1.28709	-1.17107	-0.161217	-1.2514	0.547469	-0.196056	2.58877	-0.0682441	-0.458358	1.46872	-1.36109	0.976752	2.41062	-0.561644	-1.92457
Vps50	ENSMUSG00000001376	0.867706	-0.340943	0.0348639	0.0993333	0.537207	0.746793	0.948916	0.959004	0.999571	-0.96963	-0.118236	0.059254	0.89466	0.999931	0.978147	-0.182091	1.9429	1.34078	0.419286	2.78371	1.99748	1.80771	0.923623	1.67484	1.56061	1.88085	-0.0402773	2.327	-0.129873	-0.75549	2.08604	1.90571	1.69953	1.87517	2.12639	1.51676	0.993835	1.96601	1.76286	0.613633
Hars	ENSMUSG00000001380	-0.0386655	0.0190827	1.46261	0.959991	0.992631	0.982917	0.994673	0.00102915	0.0578883	1.47807	0.590542	1.07653	0.275081	0.999931	0.111632	-2.97777	-0.0465281	-2.03419	1.63396	0.439631	0.611178	0.617117	0.394201	0.0139978	-1.43079	1.38701	1.62227	0.768444	1.34591	-1.80279	1.3403	0.223616	1.70574	0.173201	0.154367	0.22467	-0.552518	-0.0887312	2.57689	0.512268
Zmat2	ENSMUSG00000001383	0.753639	0.497189	0.49889	0.102918	0.541894	0.483136	0.889313	0.43499	0.999571	0.505848	0.310965	-0.527193	0.913699	0.999931	0.649794	0.925371	1.679	1.76405	1.01698	2.37513	2.55128	2.64186	2.00363	2.68519	1.35254	1.45973	2.646	1.92668	2.67758	1.84038	2.54641	1.97531	1.84497	2.09136	1.97509	3.03696	1.97895	2.24539	1.92893	1.61519
Smg5	ENSMUSG00000001415	-0.462166	0.337631	-1.27026	0.523528	0.881542	0.631914	0.921059	0.0554909	0.582755	-0.054549	-1.1692	1.22552	0.993073	0.821917	0.394069	1.20561	0.104972	1.07873	0.912643	0.384652	0.529407	0.733041	1.35179	1.24005	0.350313	-0.215658	-0.656199	-0.38278	1.01568	-0.291745	1.92258	-0.538591	0.909454	1.04244	0.497836	0.451704	0.124636	0.291883	0.739633	1.08034
Cct3	ENSMUSG00000001416	-0.0204582	-1.59679	-0.361028	0.964142	0.993304	0.0649764	0.497364	0.412076	0.999571	-0.288052	0.881949	0.550316	0.93977	0.999931	0.763502	1.9908	1.51392	2.11427	0.90353	-2.10046	1.21663	1.85035	3.63788	0.95975	2.14319	1.15162	1.64892	-0.387732	1.50952	0.192431	-0.492093	1.89871	3.24454	1.26452	0.906733	1.81295	3.24102	1.98764	2.84591	2.59104
Glmp	ENSMUSG00000001418	-1.08359	-0.864094	-0.487212	0.119782	0.581762	0.410747	0.874012	0.442571	0.999571	-0.0499856	0.668209	0.553086	0.99147	0.999931	0.751806	2.38157	2.57	0.752443	2.67508	0.607586	0.541731	0.963329	1.17778	0.566681	1.61107	1.46574	0.339102	1.62142	1.80331	1.76267	1.54296	1.31779	1.41837	1.22926	0.990587	2.15855	1.0371	2.66814	1.78504	2.82934
Mef2d	ENSMUSG00000001419	-0.730457	-2.11861	-0.46207	0.317113	0.780359	0.000327201	0.0116091	0.475814	0.999571	-2.28163	2.42151	-0.538344	0.00616938	0.0243423	0.59221	1.44234	0.524274	1.58717	-0.107518	0.406875	-0.787009	0.375761	3.2758	-1.51492	-0.270172	-0.373662	0.0845523	-0.932982	-3.29313	-0.5859	-0.103983	0.766959	-0.0216497	0.675356	1.14716	2.11128	-0.819147	-1.08132	-1.12556	1.22414
Snd1	ENSMUSG00000001424	0.463389	-0.743274	0.0314872	0.432521	0.83832	0.421658	0.878209	0.96766	0.999571	1.39011	1.46054	-1.33209	0.663468	0.706746	0.433092	-0.040978	0.0906611	0.384708	0.914765	1.61552	1.63107	0.197768	-2.42864	-1.88069	0.652901	-0.283596	-0.47484	2.07895	1.58168	2.0127	1.17729	0.70721	1.27614	0.761899	1.75266	1.01115	-0.21465	1.1856	-1.56809	0.855324
Slc19a1	ENSMUSG00000001436	1.42365	0.318136	1.29949	0.00447674	0.100626	0.794446	0.958728	0.0707027	0.647411	-0.245879	1.34735	-0.123157	0.957281	0.747215	0.958645	-0.701368	0.324418	0.199489	-0.0961675	0.214624	2.14889	0.48501	0.243801	0.505433	1.13772	1.76422	0.941743	1.07144	-2.68019	1.13465	0.487333	1.20082	-2.30994	2.11879	-1.97023	2.27912	0.901498	1.40484	0.808819	1.37038
Kpnb1	ENSMUSG00000001440	-0.535413	-0.932376	-0.224931	0.0754676	0.477153	0.263265	0.8379	0.52864	0.999571	-0.490576	0.285283	-0.608415	0.884374	0.999931	0.698764	1.02723	2.21405	2.01952	2.14086	-1.98223	1.65515	1.7892	2.21664	0.0231163	0.739443	1.59983	1.13571	1.46066	1.91123	1.47154	0.829007	0.304737	2.31193	1.38433	1.49706	0.588201	3.81039	-0.115944	0.523559	1.788
Npepps	ENSMUSG00000001441	0.358687	0.714893	0.854405	0.578388	0.901831	0.416168	0.876323	0.248848	0.950228	-0.350528	-0.207182	-0.973584	0.957281	0.999931	0.48014	0.163698	1.07549	0.681139	1.1427	0.455724	1.47992	1.40853	1.70294	1.84357	2.20989	1.42582	2.62306	1.20243	0.867019	1.99053	0.423875	0.408717	0.795693	1.55415	2.07367	0.208343	1.88136	1.43814	0.191294	1.39091
Mrpl10	ENSMUSG00000001445	-0.840071	0.58407	-0.06323	0.248561	0.732628	0.372277	0.863727	0.938798	0.999571	-1.12818	0.0444656	-0.301214	0.807136	0.999931	0.871774	1.77765	0.0754585	1.22035	-0.381717	0.0586652	-0.222203	-0.0280712	1.02568	1.5961	0.143971	0.29922	0.523673	1.27709	-3.1114	-2.24805	2.28316	0.15486	0.360779	0.754311	0.321771	2.27999	-0.252244	2.46496	0.483257	1.48736
Cyp51	ENSMUSG00000001467	0.413069	1.87237	1.62025	0.578509	0.901831	0.00229732	0.0560051	0.00905496	0.22594	0.277036	-2.53205	-1.5969	0.969437	0.00662875	0.0451728	-0.699865	0.0373063	-0.0240775	-0.847416	0.396939	-0.14714	-0.511263	-2.24792	2.97231	1.67824	1.60863	0.780681	2.88234	0.637177	-0.747761	-1.60635	-1.91605	1.27623	-3.10726	0.0901109	0.753509	-0.0344678	1.58473	-1.40908	0.448298
Tcf25	ENSMUSG00000001472	-0.323649	0.256422	-0.227621	0.315421	0.779042	0.436214	0.880593	0.513101	0.999571	0.0250343	-0.760144	-0.0200903	0.991836	0.605408	0.986311	2.25082	2.00368	2.67047	2.48155	2.76185	2.18341	2.03179	2.90279	2.75868	1.86433	2.06762	1.26336	2.2725	2.42316	1.53694	2.67652	3.21052	2.65281	1.7311	2.37872	1.3899	1.56876	3.13882	2.10326	2.26785
Tubb6	ENSMUSG00000001473	0.0696253	0.138578	0.0852416	0.86565	0.97317	0.883801	0.975183	0.780778	0.999571	1.39815	-0.7396	-0.330862	0.52506	0.999931	0.695292	-3.16701	-0.413743	-0.168491	-1.08519	-3.55454	-0.346439	-1.06947	-2.76238	0.232816	-2.41748	-2.90973	-0.56856	-2.26431	1.67367	1.26584	-2.4141	-2.43482	-0.0590801	-0.568565	-2.37725	-2.40453	0.390842	-0.899557	-2.33533	-1.36168
Def8	ENSMUSG00000001482	-0.316034	0.270508	-0.448662	0.681399	0.933578	0.830573	0.965989	0.521454	0.999571	-0.858901	-0.906651	0.0419335	0.901229	0.997175	0.98441	0.235243	1.71661	-2.2056	0.403968	0.914811	0.655917	-2.16515	-2.73279	1.64843	0.960874	-3.2	0.722945	-1.8275	-0.269851	-1.64276	-2.21355	-2.1502	0.827302	-3.13388	-2.32656	0.472393	-2.42084	-3.06095	1.48779	0.193576
Col1a1	ENSMUSG00000001506	-0.33757	0.495872	1.12368	0.201324	0.69292	0.586621	0.913383	0.025931	0.404931	1.2918	0.257323	2.07453	0.686214	0.999931	0.000176986	-0.824759	-3.21136	-1.55331	-1.63296	-2.00904	-3.45201	-2.88826	-2.92881	-1.15108	-2.4526	1.07604	-0.162993	-3.75198	0.596674	0.17012	-2.29211	-0.862211	1.23688	-3.37247	-1.06867	-0.591171	-1.30621	1.51524	1.23967	0.225828
Itfg2	ENSMUSG00000001518	-0.85295	-0.169062	-1.08438	0.13319	0.608926	0.808695	0.961306	0.0507425	0.558312	-0.583827	1.37826	-1.4101	0.912858	0.72409	0.400009	1.49461	1.23491	1.65131	1.04734	0.806737	1.73097	0.843008	0.543938	0.751846	1.69183	-0.438054	0.318036	1.00279	0.503907	1.04034	0.893518	0.745239	1.11939	0.512204	0.63731	1.53942	0.457325	0.731862	-0.712701	1.35868
Tulp3	ENSMUSG00000001521	0.424308	0.0878967	-0.573149	0.507145	0.87501	0.913077	0.978526	0.412623	0.999571	-0.427202	-0.992254	-0.549938	0.951767	0.986251	0.756621	0.0311338	0.623686	0.279264	-1.58983	0.300436	1.18943	-0.474495	-2.86248	0.644017	0.700335	0.540682	-3.04707	1.32371	0.937938	0.530239	-2.39618	0.139743	0.884576	-0.452874	-1.16517	-0.575861	0.56845	-0.162685	-0.573344	0.662654
Tubb5	ENSMUSG00000001525	0.374818	-0.967736	0.455818	0.296495	0.769919	0.21694	0.802382	0.105054	0.727989	0.142102	0.0937261	-0.194744	0.968385	0.999931	0.0118185	2.50652	2.58592	2.35928	2.43939	2.94149	2.85511	2.47507	3.30877	2.53723	2.0159	3.07327	2.67449	3.24589	2.62436	2.32784	2.30531	3.13143	2.41987	2.14213	2.64144	2.41518	2.5057	2.9372	3.1964	2.94274
Ell2	ENSMUSG00000001542	0.829245	-0.630615	0.342617	0.154154	0.635748	0.620123	0.921059	0.643501	0.999571	0.26351	0.0679849	0.285627	0.971793	0.999931	0.892198	2.18344	1.37557	0.801288	0.300727	2.00475	2.15212	2.28088	0.896017	1.66712	1.6934	2.46688	-0.554316	2.21307	1.63966	2.22424	1.86317	1.79788	-0.352052	1.56479	1.22725	1.43279	1.7416	2.0197	2.07797	1.26833
Jup	ENSMUSG00000001552	0.197037	-1.05261	-0.363939	0.795196	0.95794	0.377772	0.865254	0.547356	0.999571	0.0692982	-0.228274	0.457783	0.989993	0.999931	0.814269	0.0118244	1.6613	1.99272	0.0697805	2.18139	0.510168	1.34753	1.69421	0.736905	-0.388785	1.72509	-0.571292	0.764289	1.80961	2.06277	2.0265	2.85865	-0.591203	0.769134	1.33706	0.122078	0.597027	2.31699	0.969563	1.81389
Nom1	ENSMUSG00000001569	0.288389	0.218651	-0.0924168	0.710537	0.9437	0.81688	0.961539	0.907276	0.999571	-0.144182	0.847038	2.01162	0.982164	0.999931	0.0170188	0.877392	0.870319	1.15874	0.706095	1.62783	0.575392	1.34326	2.33641	1.48457	1.19904	0.772295	1.02522	-0.0810232	1.46674	1.40011	0.498059	1.13191	0.569173	1.68359	1.05659	1.71243	0.732708	1.2472	1.79442	1.41307
Ergic1	ENSMUSG00000001576	0.464993	-1.22369	0.28818	0.396388	0.821708	0.26012	0.833842	0.675202	0.999571	0.274534	0.461021	0.503424	0.95659	0.999931	0.782747	1.90854	1.64204	1.50906	1.46686	1.13121	1.77992	2.21937	2.33221	1.49718	1.73763	1.73359	1.85021	0.663273	1.7295	1.9742	1.77248	1.58243	1.71246	1.65928	1.40647	1.58049	1.16512	2.105	1.6151	1.92646
Ifrd1	ENSMUSG00000001627	-0.624227	-0.738658	0.155942	0.251015	0.735153	0.428511	0.878843	0.673011	0.999571	-0.206239	0.955743	-0.846152	0.962639	0.902146	0.505258	1.6387	1.87902	2.0295	2.0143	1.43834	1.68577	1.2247	1.99181	1.10377	1.21915	1.93058	2.41677	1.53608	1.3235	1.47505	2.08071	1.97911	2.12437	1.19127	1.87836	1.92637	2.13825	1.52787	1.31612	1.44657
Stk38l	ENSMUSG00000001630	0.463251	-0.864603	-0.192225	0.443753	0.844514	0.266821	0.839291	0.76931	0.999571	-0.0408795	1.25893	0.01318	0.995319	0.695051	0.996364	1.44778	-0.551988	0.17991	-0.389322	-2.30568	1.31697	-1.80464	-2.33427	-2.37029	-1.20628	-3.74404	0.70007	-1.50492	-0.25971	-0.966998	-0.886986	1.01294	3.06316	0.673668	-0.357819	0.626986	1.4288	0.886399	1.92051	-1.53322
Brpf1	ENSMUSG00000001632	0.0775852	0.121459	-0.483213	0.874993	0.974489	0.843728	0.967109	0.464524	0.999571	-0.519763	-0.237494	-0.155067	0.934516	0.999931	0.888464	1.38722	1.97552	0.98807	0.707914	2.13345	1.89812	1.59242	0.274272	1.48596	1.5034	0.671691	1.14537	1.29823	1.12696	1.69691	1.22355	1.36144	1.41644	1.44576	1.72293	1.36114	0.935792	0.83355	1.02113	0.948794
Akr1b3	ENSMUSG00000001642	-0.933602	-1.9008	0.0205698	0.0296127	0.300306	0.000235783	0.0090326	0.948189	0.999571	-0.241044	0.478797	-0.527928	0.951016	0.999931	0.756222	2.5325	1.8755	2.58371	3.7065	-1.78306	1.49703	2.83432	3.05705	-1.67232	1.6991	2.23762	2.34716	1.82086	1.72513	1.222	1.42053	1.22428	2.69626	1.32134	1.12592	-1.70977	1.48522	0.688749	1.99552	1.68711
Gstt3	ENSMUSG00000001665	0.507492	-0.644958	-0.869498	0.422567	0.834046	0.37453	0.865254	0.122402	0.770846	-0.000893316	1.5208	1.56778	0.999667	0.520449	0.169289	1.5348	0.119272	-2.76757	-0.736112	-3.05291	1.41088	0.772438	-2.43923	-2.61488	-1.15072	-3.3439	-3.22961	-2.00909	-0.320146	2.6308	-0.969661	-2.65337	-0.853589	0.922362	-0.0883713	0.963989	-1.58706	1.49702	1.0659	2.07738
Ddt	ENSMUSG00000001666	-0.783057	-0.868826	-0.819193	0.125922	0.594597	0.476249	0.889188	0.154381	0.819732	0.879818	-0.1142	0.684515	0.847382	0.999931	0.650703	0.719721	1.93073	0.319777	-0.793613	1.67185	-0.765967	1.06609	-2.22218	1.04941	-1.365	-3.01851	-0.0627781	-1.59006	2.18917	-1.23041	3.90406	1.40164	1.61446	0.634158	0.797987	0.824795	-1.14972	0.0899758	2.17401	-0.690302
Ddx18	ENSMUSG00000001674	1.00472	0.912735	0.652353	0.0520737	0.395912	0.385506	0.865974	0.37774	0.999571	-0.706789	-0.647923	0.440163	0.884374	0.999931	0.844932	1.95389	-2.83592	1.47775	0.316067	-1.63636	2.36834	1.97163	2.72398	2.1326	1.67925	0.417282	1.96546	-0.774138	-2.86064	-0.594819	-1.88482	-1.14922	1.56373	1.72342	-1.05856	-1.08832	-0.551213	-1.12907	2.07428	0.951723
Ubl3	ENSMUSG00000001687	0.122781	-0.0792417	0.175239	0.693461	0.939194	0.884122	0.975183	0.606358	0.999571	-0.113942	0.420868	-0.331829	0.974377	0.994951	0.687637	2.91045	2.29281	2.1815	2.24994	2.59965	2.61007	2.71156	3.01425	2.35208	2.94389	2.16022	2.60905	2.44476	2.34484	2.57199	2.23988	2.43232	2.28797	2.4885	3.07637	2.92479	2.47244	2.30745	2.40768	2.78757
Gramd3	ENSMUSG00000001700	0.129162	-0.577399	0.836994	0.838898	0.969372	0.602879	0.916973	0.202058	0.906653	-0.912224	0.148876	0.240087	0.875027	0.999931	0.91876	-0.320064	0.724694	0.135337	-1.05599	1.97061	-0.0443015	-0.761318	-2.17124	0.757757	-1.67382	1.77847	1.86076	-1.63524	-3.16778	-1.20648	1.73908	1.69241	2.06332	-0.71824	0.372132	1.25021	-0.721614	-1.17941	1.81259	-0.02581
Akt1	ENSMUSG00000001729	-0.255458	-0.536997	0.430046	0.667307	0.930545	0.62431	0.921059	0.335199	0.999571	-0.0445017	1.00158	-0.266612	0.992792	0.938245	0.81265	1.48374	1.73541	1.61002	1.69827	1.6551	1.28702	1.81482	2.21293	1.71868	1.28026	2.1064	2.02246	1.89322	1.22138	0.966102	2.09832	1.90942	1.96176	1.43898	1.8023	1.95033	1.25698	2.19204	1.68423	1.86867
Il16	ENSMUSG00000001741	0.81222	0.0022712	1.14438	0.15557	0.638046	0.998595	0.999852	0.129214	0.783783	0.593623	-0.279171	-0.547412	0.942554	0.999931	0.784918	-3.14211	2.24125	-2.35654	1.01248	1.87475	1.84114	0.913282	0.658734	1.95987	-1.83272	1.84333	1.17185	2.00272	1.26738	-1.80011	1.47626	1.34609	2.38041	2.10027	0.968476	0.943072	1.87247	-2.97644	1.63417	0.604356
Tcirg1	ENSMUSG00000001750	-1.59002	0.500865	0.464842	0.00656979	0.125424	0.466414	0.888383	0.250827	0.952284	-0.126494	0.171149	-0.868972	0.983046	0.999931	0.602878	2.03557	2.10752	0.78986	2.39641	0.917813	-0.154814	0.921762	3.42451	2.45805	2.82323	1.93557	2.03328	0.920209	1.27526	0.870014	0.366872	1.51423	1.14156	1.64124	0.885938	2.75928	2.52388	0.497692	1.15159	1.59713
Naglu	ENSMUSG00000001751	-0.552165	-1.47676	0.369317	0.451763	0.847582	0.0503004	0.439731	0.627931	0.999571	-0.903686	1.76621	0.564625	0.847382	0.433343	0.782186	1.1699	1.49873	0.155632	1.95599	-2.73226	0.870012	1.20631	0.817915	-2.33827	0.540659	1.16981	1.54586	-2.16163	-3.18691	1.73045	1.2212	1.12178	0.871047	1.88	0.52808	0.88725	1.10682	1.68609	1.23417	-0.0241734
Coasy	ENSMUSG00000001755	1.43924	-0.88889	0.0832119	0.00257635	0.0746429	0.163717	0.743633	0.880846	0.999571	0.0884612	2.74424	1.36996	0.989993	0.0134885	0.301656	-0.758861	-0.128985	0.272661	0.0431277	0.90257	1.54573	0.961074	2.38906	-0.998304	-0.15558	-0.0661156	-0.616898	-0.497104	0.295989	-0.188345	0.0200964	1.02075	0.21366	1.28773	0.29862	1.74549	-0.0825378	-0.363399	1.38585	1.68487
Smo	ENSMUSG00000001761	-0.536703	-1.10003	-0.302677	0.174349	0.663075	0.290624	0.842733	0.45554	0.999571	-1.1196	0.972557	-0.350279	0.799	0.999931	0.769796	-0.643786	1.22414	0.23178	-2.26332	1.09984	-0.935816	-1.78425	-2.58707	0.171836	-0.862227	0.503554	-3.15736	-1.61239	-0.595658	1.89976	-0.662199	0.836294	-0.412695	1.41863	0.713937	0.778194	1.9906	0.574644	-1.7682	-1.05786
Tspan33	ENSMUSG00000001763	-1.17564	-1.16313	-1.01893	0.0133319	0.191445	0.323291	0.849251	0.0452122	0.535258	-1.48679	-0.649427	-0.365833	0.349349	0.999931	0.686065	1.10512	1.43626	0.82694	-1.03849	0.194588	-2.91902	-1.74953	-2.37836	0.858408	-1.58741	-0.436766	-0.418531	-1.82403	-2.84874	2.37698	1.11935	0.843737	-1.84608	1.40071	1.16023	-2.22661	0.621977	-0.545407	-2.01347	-0.43345
Crnkl1	ENSMUSG00000001767	0.0284133	0.774047	1.26433	0.964228	0.993304	0.497715	0.892718	0.0621768	0.61088	-0.120707	1.48529	-2.89935	0.983308	0.792811	3.91106e-10	-0.26431	0.210246	-0.088732	-0.0319513	0.217854	0.106911	0.632699	0.913301	0.373517	-0.464977	0.343841	2.14707	0.992685	-1.013	-0.10336	0.964821	2.09217	0.33314	1.02796	0.392849	0.918654	0.63399	-0.964445	-1.83744	0.0777347
Rin2	ENSMUSG00000001768	-0.25779	-0.93977	-0.495276	0.550492	0.891909	0.219246	0.805633	0.177218	0.857926	-0.434685	2.21655	0.441682	0.875027	0.293107	0.762657	1.96779	2.38795	2.55539	1.96273	1.98129	2.0127	1.91362	2.71995	1.66106	1.5838	2.00089	1.2624	1.73278	2.05012	2.03593	2.12641	3.00054	2.1407	2.30597	1.57644	2.71912	1.88587	2.96167	2.0189	2.95741
Chordc1	ENSMUSG00000001774	-0.696341	-1.2427	-1.03294	0.270038	0.747866	0.268379	0.839783	0.0955959	0.711203	-0.890673	0.0709258	-0.141759	0.884374	0.999931	0.949515	0.708013	1.74823	1.87618	2.07064	0.514402	1.26132	0.256862	0.404597	0.552054	-0.387972	-0.294298	0.325961	1.24935	0.478944	1.05313	1.1087	0.441998	1.51799	1.49524	0.3197	0.0956025	-0.000599343	2.23905	0.93876	1.20791
Rtcb	ENSMUSG00000001783	0.342371	0.123259	0.141852	0.394817	0.820339	0.849462	0.968569	0.773065	0.999571	0.0849172	-0.851616	-0.365461	0.982451	0.819505	0.798283	2.29031	2.34095	1.98072	1.78582	2.2926	2.48132	2.14158	2.07249	2.60237	1.90568	1.78201	2.22228	2.00373	2.25313	2.0909	1.91014	2.68402	2.52612	2.54149	1.95683	1.84949	2.32324	1.6125	2.10439	2.016
Pwp1	ENSMUSG00000001785	-0.608941	-0.413102	-0.0683697	0.15589	0.638632	0.745184	0.948916	0.925246	0.999571	-1.06501	-0.823895	-0.515092	0.823758	0.999931	0.643525	0.551036	0.66947	0.467392	-2.32772	0.383183	-2.70203	-0.801275	-2.8072	0.828868	1.19608	-0.303333	0.885722	-1.63096	-2.66636	2.96277	-1.87694	-1.64904	-2.19501	0.856153	1.23746	-1.604	-0.570343	0.438654	-1.67423	-0.571154
Fbxo7	ENSMUSG00000001786	0.227408	-1.93815	0.15163	0.649895	0.928241	0.0108282	0.170342	0.848357	0.999571	-1.19849	0.514312	0.532883	0.811299	0.999931	0.810193	-3.19425	1.22812	1.16214	0.58358	-1.54255	1.02172	-0.708245	0.995097	-2.28423	0.847687	0.0697121	2.05788	-1.61897	-0.874066	-1.18346	-2.36691	0.526163	1.96181	0.677951	0.46451	-2.33743	1.76999	-2.60703	1.97306	1.45201
Capns1	ENSMUSG00000001794	0.200748	-1.29782	0.127041	0.662789	0.929947	0.203731	0.796656	0.785814	0.999571	-0.100691	1.89766	-1.06618	0.984764	0.402474	0.376997	2.66703	2.63472	1.6127	1.84239	2.59657	2.33285	2.29814	3.21578	1.96888	1.65572	1.47954	1.84759	2.67975	1.49642	-0.0269729	2.87132	1.88065	1.89576	2.1774	2.0419	3.17481	2.42665	0.337745	2.21855	0.779925
Folr1	ENSMUSG00000001827	-0.964437	-0.800953	-0.362832	0.0287273	0.295063	0.2781	0.84107	0.593212	0.999571	-0.478081	1.37535	-0.269972	0.943372	0.718119	0.858119	1.4788	-0.477029	-1.05468	-3.58528	-3.21962	-3.01962	-1.30746	0.551396	-3.35231	-2.3436	-3.00255	-0.530222	0.279303	-0.390819	-3.1569	-2.32262	-0.47262	-2.36059	-2.98957	-0.0692408	-0.531054	1.28568	-3.12079	0.154591	-1.05783
Clpb	ENSMUSG00000001829	-0.427615	1.48797	-0.715161	0.576876	0.901525	0.0988792	0.621902	0.317414	0.993702	0.012434	-1.62744	-1.69918	0.998131	0.389977	0.185905	0.562727	1.60321	-0.950866	1.14168	0.54742	0.527813	0.0864704	0.512168	1.63178	0.954748	-1.34951	-3.04903	1.40459	0.373571	-2.13989	-1.29245	-0.566791	1.99041	0.185197	0.00948567	-0.676405	-0.188507	-2.64263	-2.53362	-1.11383
2019-09-07	ENSMUSG00000001833	-0.0502454	0.216941	0.0201578	0.88841	0.977293	0.786473	0.958728	0.965905	0.999571	0.421443	-0.0585372	0.831521	0.903618	0.999931	0.451834	1.85193	2.60485	1.41003	2.79534	2.54251	2.63794	2.29918	1.11865	2.12865	1.66195	2.66006	0.97782	1.54247	2.72373	2.76473	2.86187	1.90417	2.38854	2.23006	1.8652	1.98605	1.65947	2.85623	3.00719	1.54634
Zdhhc4	ENSMUSG00000001844	0.558427	-0.890254	-1.2289	0.313095	0.778032	0.450985	0.884654	0.0159571	0.311071	-0.592722	0.00630079	-1.5467	0.942554	0.999931	0.326726	2.14549	1.59082	-0.299266	-0.742731	1.02958	1.53354	2.40462	-2.65437	-0.0843796	2.84551	-0.720412	-3.13264	1.6032	0.254705	1.57773	1.29196	0.499091	-1.1257	1.16752	-0.387767	-0.199426	-1.31068	-0.647784	-2.87551	0.192765
Rac1	ENSMUSG00000001847	0.081423	-0.285868	0.419599	0.772015	0.952909	0.625291	0.921059	0.0912423	0.699774	0.26944	0.682391	-0.313041	0.93977	0.832766	0.637265	2.82922	2.93094	2.36378	2.8012	3.36005	2.76961	3.26106	3.30141	3.12732	2.66968	3.01139	3.5517	2.79327	2.7074	2.69313	3.26803	2.79732	2.88365	3.05596	2.96464	3.48589	2.32576	2.47442	2.78999	2.97269
Nup214	ENSMUSG00000001855	-0.860423	-1.32607	-1.82804	0.265517	0.745297	0.129424	0.693167	2.98227e-07	9.90449e-05	-2.74621	-0.00725337	1.15264	2.08136e-07	0.999931	0.421439	1.47618	1.95204	2.3356	-0.943947	-0.271566	0.0327677	0.402911	1.03746	0.369677	0.205411	-2.97423	-0.027721	-2.04495	-2.98122	-1.83924	0.599625	0.361666	0.763761	-0.436308	0.588895	0.533687	-1.2909	0.483129	1.0447	0.653893
Ltbp1	ENSMUSG00000001870	-0.239514	0.60074	0.891587	0.716921	0.944454	0.623829	0.921059	0.22038	0.929778	-0.228479	0.244322	-2.1521	0.972444	0.999931	0.0176225	-0.315116	-2.90332	0.960057	1.19049	1.21653	-0.0323647	-0.196872	0.129453	0.141605	1.31971	0.150337	2.63664	0.684352	-0.322954	1.4648	-1.70671	-2.12897	0.922778	0.0545127	0.59382	0.432019	-2.04641	0.118393	-2.28247	-0.044946
Ugp2	ENSMUSG00000001891	0.675324	-0.430445	-0.940069	0.251175	0.735153	0.721789	0.943436	0.105364	0.728984	-0.767014	-0.384507	0.891403	0.91179	0.999931	0.476026	0.867074	-0.0148425	-0.501277	-1.63302	-3.4557	1.02012	1.00935	-2.2864	-0.356321	-1.68351	-0.183245	-3.30158	-2.3618	-0.948073	1.5633	-1.50663	0.265388	1.10003	1.13143	-0.538739	-3.05553	1.3587	-1.01092	0.599788	-0.791587
Trmt1	ENSMUSG00000001909	-1.42822	0.74779	-0.482356	0.00787958	0.140579	0.340117	0.852824	0.509834	0.999571	-0.758277	-1.6973	-0.435305	0.926038	0.375469	0.706335	1.61624	2.22931	-1.1856	0.0672569	-2.29094	-1.31731	2.61056	-1.6532	0.967125	3.37366	1.42624	-3.53121	-1.62666	-0.894956	-0.635896	1.52336	-0.494792	-0.727597	-0.541585	-1.34798	-0.838619	0.233825	-3.16187	-2.11779	-0.795994
Nacc1	ENSMUSG00000001910	0.54943	-0.0608694	1.22472	0.41874	0.831352	0.956875	0.988257	0.0901207	0.696134	-0.296608	-0.805756	-0.358177	0.953923	0.999931	0.832339	-0.284575	0.443185	-1.60317	0.370293	-3.02437	0.922382	0.67711	0.531142	1.28429	-2.29127	2.01816	0.442068	1.81804	-3.07167	-1.35143	0.634358	1.52992	1.25586	0.196828	-1.64351	-1.56995	-0.32219	0.856669	-1.47721	1.54016
Nfix	ENSMUSG00000001911	-0.386311	-0.595492	-0.499671	0.341651	0.798873	0.443423	0.881571	0.334794	0.999571	-0.189869	1.18878	0.143261	0.953849	0.731809	0.939586	2.17865	2.06451	2.23901	2.37225	2.22535	2.11772	1.92733	1.90706	1.86131	2.51445	1.99826	1.71775	1.80462	2.24486	2.57641	1.80046	2.04337	2.29272	2.13697	2.06915	2.26246	1.7699	2.72141	1.84119	2.22983
Slc1a5	ENSMUSG00000001918	0.468009	-0.637941	-0.228145	0.359044	0.805578	0.478505	0.889313	0.760261	0.999571	-0.835433	0.0348976	-0.584694	0.883427	0.999931	0.744849	0.871331	1.07203	2.90876	0.110102	2.14012	1.78132	1.82696	0.537533	1.53955	1.23339	0.302674	2.44294	1.25829	0.962999	1.28569	1.34108	1.5532	1.81584	1.61206	1.62682	0.881749	0.581325	1.32557	1.27625	1.01823
Uba1	ENSMUSG00000001924	-0.257795	-0.185609	-0.0607962	0.592555	0.906627	0.859679	0.969757	0.902605	0.999571	0.386019	1.41424	-0.472213	0.948492	0.816749	0.770086	1.14186	2.37508	0.77124	1.66802	2.16079	1.5632	0.657096	-1.99992	1.49641	1.6621	1.43767	0.846161	2.97756	1.36055	-0.380807	3.19123	1.35075	2.12647	2.03109	0.536363	3.08213	2.23798	0.563371	2.16077	0.480821
Vwf	ENSMUSG00000001930	0.228637	0.207021	0.672964	0.746603	0.950981	0.844959	0.967109	0.350729	0.999571	-1.1809	1.78602	-1.17823	0.749821	0.40533	0.281175	0.0121187	1.95892	0.802326	1.56182	0.42818	1.60565	0.975586	3.54488	1.43356	2.46327	1.56395	1.57035	1.45162	-0.327762	1.7224	-1.0555	1.22041	0.972205	1.2899	1.56719	3.32979	2.30543	2.19532	-1.40701	1.44409
Siae	ENSMUSG00000001942	1.06262	-0.958493	0.121254	0.0274225	0.289749	0.179823	0.76486	0.799521	0.999571	-0.248318	1.63842	1.4313	0.971265	0.561811	0.285337	-3.3461	0.556613	-0.198223	-0.182341	-2.34913	1.1937	0.687256	1.65704	-2.4345	0.660178	-0.978455	-0.368203	-1.69918	-1.01501	-1.24065	1.02671	0.961945	-1.42129	0.220033	0.101896	0.601255	0.545777	2.09449	1.60526	2.13104
Esam	ENSMUSG00000001946	0.700689	-0.619686	0.999594	0.190305	0.68511	0.547844	0.905921	0.0789668	0.673598	0.666046	1.4782	-0.194154	0.884189	0.449734	0.828827	0.107971	1.82877	1.51238	1.48999	2.1632	2.09961	2.52597	2.93175	1.48693	2.39577	2.65439	2.39468	2.10605	2.81702	2.07281	1.86468	2.54254	1.54082	2.35873	2.38383	3.68209	2.71997	2.67382	1.78363	2.46193
Fam50a	ENSMUSG00000001962	-0.314428	-1.55586	-1.07441	0.593408	0.906716	0.157922	0.736651	0.102843	0.727533	-0.58053	-0.0668589	-2.03912	0.883008	0.999931	0.00761619	0.217801	1.96805	2.18231	0.584785	0.0508318	1.04356	-0.175713	-2.26086	0.183013	1.60874	-3.52416	1.62709	1.87437	1.41589	-1.25681	-1.17965	-2.63864	2.19038	-0.585388	-0.463679	0.338086	0.62135	-3.19099	-2.0213	-2.14249
Emd	ENSMUSG00000001964	0.0146667	-1.0425	0.679288	0.985302	0.996013	0.373641	0.865152	0.321127	0.993814	-1.00241	2.31216	-0.861774	0.820356	0.265295	0.594572	1.36866	1.54996	-0.55167	-0.358836	2.00885	0.602017	1.08124	-3.05857	-0.445897	0.794437	1.49791	1.85383	0.839539	-0.495366	2.09409	1.02174	1.48658	2.45829	1.87473	1.32683	2.41866	-0.83346	0.999042	0.197898	1.44845
Grik3	ENSMUSG00000001985	0.791128	1.61993	0.169015	0.210318	0.70153	0.0227475	0.275527	0.836164	0.999571	1.51206	-1.17006	0.339909	0.54694	0.683767	0.840618	0.0531226	-0.638229	-0.175558	0.0237535	0.894909	1.30033	0.128975	-2.82946	1.0488	1.66465	-0.393706	-0.0375524	0.69429	1.90843	1.36068	-1.30465	-3.04395	1.29623	-0.233265	0.538886	-0.0280977	-0.858677	0.784351	1.03034	0.723859
Gria3	ENSMUSG00000001986	1.12936	1.83156	0.17026	0.0138934	0.195387	0.018053	0.236037	0.721974	0.999571	1.93586	-1.16318	-0.318387	0.0393522	0.743009	0.874431	-0.443864	-3.12139	-0.854339	-1.38667	-2.69644	1.30711	-0.638135	1.14163	0.847822	-2.76347	-3.4718	0.88123	-2.94543	1.28895	-2.56224	2.28562	-0.057802	0.442966	-3.32524	0.507388	-0.714061	1.13986	-0.702778	0.661069	-1.16999
Sipa1l2	ENSMUSG00000001995	-0.237849	0.326683	-0.626425	0.669817	0.930613	0.670527	0.930886	0.250838	0.952284	0.132123	-0.717207	-1.09345	0.980259	0.961829	0.105133	1.54973	2.63329	1.15653	2.43266	2.62365	2.12942	1.5932	2.12008	2.36947	1.36153	1.00955	0.561069	3.28748	2.41255	1.36087	1.06146	1.62569	1.81827	1.27357	1.69516	1.30478	0.873067	2.48866	1.02992	1.05977
Ap4e1	ENSMUSG00000001998	-0.0852247	-1.0234	-0.86262	0.888441	0.977293	0.362655	0.862671	0.288075	0.976917	-0.102741	0.107644	0.52656	0.984764	0.999931	0.801543	1.71649	1.04158	0.971692	0.489461	-2.30763	0.966644	1.87166	1.95238	0.645087	0.848066	-1.13418	1.68708	-2.36579	1.25025	1.38436	-2.01919	-2.67222	1.92439	1.12083	0.619012	-0.0646502	1.59589	-2.808	2.36129	1.07901
Blvra	ENSMUSG00000001999	0.856444	-0.604295	0.376645	0.0815583	0.493463	0.615314	0.91927	0.652086	0.999571	0.872842	0.725384	-0.79666	0.875124	0.999931	0.392066	-0.809423	1.80649	0.894099	0.637344	0.295774	2.06998	0.552732	1.40741	1.28796	0.21096	0.611714	2.07168	-0.713688	2.16849	1.75339	0.592031	1.56634	1.1202	-0.62257	-0.733912	2.51106	1.65757	-0.262334	-0.726036	1.66809
Pdzd4	ENSMUSG00000002006	1.34697	-0.0776408	0.309197	0.0124914	0.183638	0.866539	0.970999	0.345858	0.999571	1.57186	1.0813	1.32698	0.112462	0.952603	0.288299	-3.4375	-3.09019	-2.92631	-0.988563	-2.93857	0.858862	0.654079	1.37926	-2.74103	-1.89739	-0.79573	-3.27339	-1.98759	1.28813	-1.53216	-1.66218	0.381704	1.76096	-0.49274	1.98264	-0.295724	0.496976	1.69884	0.782754	-0.246321
Idh3g	ENSMUSG00000002010	0.808798	-1.74608	0.323685	0.0918768	0.517354	0.0765168	0.547682	0.601173	0.999571	0.0650654	0.819049	0.207676	0.990192	0.999931	0.905312	0.203814	2.0918	1.84501	1.38734	2.25926	2.41843	1.51979	3.46442	1.54177	1.10422	2.15109	0.362969	2.54303	1.70137	-0.352181	1.63155	2.25234	1.97384	2.12573	1.81445	1.86447	2.20755	1.40561	2.49325	2.76969
Ssr4	ENSMUSG00000002014	-0.045844	-1.0113	0.182003	0.873604	0.97431	0.263356	0.837959	0.46254	0.999571	0.178979	-0.0862782	-0.723382	0.957688	0.999931	0.425659	3.076	2.25219	1.48274	2.70336	1.53234	2.33664	2.85649	3.42674	1.94299	1.97309	2.21717	2.73943	2.3562	2.37477	2.53101	1.82636	2.08274	2.87067	2.33052	3.57015	1.82782	2.93886	0.960213	2.01913	2.12835
Bcap31	ENSMUSG00000002015	0.0855456	-0.94496	-0.126654	0.823816	0.96608	0.302437	0.846056	0.80972	0.999571	-0.215389	0.81785	-0.40675	0.95659	0.957065	0.801751	1.68255	2.31259	1.63336	1.43125	2.46434	1.86587	2.17464	1.35832	1.51424	1.50058	0.964793	2.20316	1.9195	1.49363	0.325593	3.06233	1.5237	2.12271	1.53275	2.07213	2.13275	0.911012	0.152948	1.9599	2.10199
Fam98a	ENSMUSG00000002017	-0.347938	0.698167	-0.45868	0.354272	0.804843	0.466759	0.888383	0.358439	0.999571	0.651997	-1.6188	-1.3416	0.936638	0.56365	0.398967	-0.735579	-2.88442	1.29145	-1.87934	1.51123	-3.03196	-1.52238	-2.46284	0.110678	0.694768	-0.160079	-3.23964	0.865347	0.472857	-2.16198	0.858878	-2.85665	-2.85531	-2.93166	0.0193539	-2.8009	-1.96656	-0.660837	-2.56579	-1.99981
Kmt2a	ENSMUSG00000002028	-0.254939	-0.47367	0.0812038	0.415086	0.831116	0.443822	0.881676	0.801415	0.999571	-0.0825689	0.371287	0.0689836	0.981639	0.999931	0.963156	1.56018	1.76062	2.13016	1.81311	1.83246	1.9578	0.561027	-2.32505	1.1556	3.51487	1.92708	1.96252	1.41116	2.24041	2.15774	1.56374	1.00721	1.93356	0.618003	0.154971	2.78335	2.18719	1.76849	2.50758	0.845197
Ift46	ENSMUSG00000002031	-0.593284	-0.366032	-0.348774	0.180969	0.670983	0.773086	0.954574	0.472327	0.999571	0.41546	0.491055	-0.305255	0.956152	0.999931	0.767882	-2.87526	0.393782	2.12201	0.0898063	1.8908	-2.42908	-1.69444	2.47545	0.043191	-3.18224	-2.40302	-0.581631	-3.22436	0.888487	1.37252	0.939246	1.18226	-0.93426	1.84338	1.36008	-0.0143824	-0.0843732	-1.56008	-3.12108	0.759806
Cd3g	ENSMUSG00000002033	0.293755	0.578931	0.438949	0.708905	0.94294	0.628664	0.921059	0.612461	0.999571	-0.392017	0.467482	-1.60907	0.942554	0.999931	0.332496	2.19173	-0.34219	-1.48761	0.0407969	2.38321	1.48595	-1.41483	-2.7819	1.08832	1.45475	1.16485	-0.631934	2.72913	-3.17374	-1.01661	-1.47243	1.36483	2.171	1.23928	-1.59785	1.74969	-1.60574	-0.177561	-1.25083	0.404748
Trappc6a	ENSMUSG00000002043	-1.17046	-1.03171	-0.336731	0.0150662	0.203686	0.204214	0.797336	0.630224	0.999571	1.50476	1.33217	-0.108498	0.574715	0.646439	0.961149	1.36159	-0.302752	-0.298634	-0.596561	-2.33248	-3.57297	-2.2173	-2.57473	-2.84076	-2.84615	-3.57463	0.387777	-2.24472	1.11187	-1.8697	2.60367	0.737017	0.55658	1.23813	-0.461092	0.0693718	0.834681	-0.455885	1.44289	-0.781031
Supt6	ENSMUSG00000002052	0.979757	1.33252	-0.0245901	0.0610378	0.430948	0.011714	0.178907	0.977151	0.999589	-1.41366	-2.54691	-0.934385	0.609758	0.0018593	0.611145	0.398653	0.475575	0.49675	-1.49019	0.927456	1.92705	0.300638	-2.64641	2.90845	1.39089	-0.600688	1.29812	1.12793	-0.655575	0.940971	-1.64982	0.148637	1.28643	0.681104	-0.0346291	-0.662896	0.357241	-0.427817	-0.00464705	0.370138
Rab34	ENSMUSG00000002059	-0.662297	0.134639	0.155398	0.073602	0.471034	0.910113	0.978526	0.849111	0.999571	0.357321	-1.15992	-0.599823	0.95659	0.901476	0.551704	-0.867257	2.13367	1.45265	0.672298	1.91605	-0.307626	0.065136	1.56523	2.59598	-0.502755	0.574932	0.785001	-0.58097	1.55178	-0.50877	2.63395	1.77927	1.35911	-0.908761	1.04532	1.3091	0.830919	1.75802	-0.643168	-0.940392
Sdf2	ENSMUSG00000002064	-0.239792	-0.273416	-0.164291	0.752129	0.951095	0.780734	0.956914	0.807503	0.999571	0.067533	0.410119	0.205043	0.990148	0.999931	0.927135	-0.285736	1.63832	0.528061	0.907838	0.697749	0.478171	0.507292	0.842494	0.387439	0.680156	1.36636	-0.0574937	0.90437	1.40719	0.876	0.692047	0.218517	1.16657	1.53803	2.26759	1.21689	2.61116	-0.357439	0.732787	1.46828
Bbc3	ENSMUSG00000002083	0.169773	-0.311444	0.799999	0.74374	0.950167	0.802015	0.960436	0.0948558	0.708408	-0.913881	0.470956	-0.904435	0.875027	0.999931	0.558658	1.32557	1.03566	0.987183	1.40183	1.59386	1.61468	1.67724	1.52078	1.1683	1.32859	1.10956	2.45053	1.94365	-0.72613	-0.402114	1.76156	1.51862	1.84512	1.62125	1.34977	1.35428	0.0511161	0.229721	1.75299	1.97856
Psmc3	ENSMUSG00000002102	0.850734	0.101164	0.826352	0.111897	0.566095	0.919094	0.97934	0.228295	0.93344	0.906089	0.466438	-0.0833564	0.823758	0.999931	0.962807	0.371675	1.782	1.08276	0.820806	2.21438	2.00503	1.90052	1.55388	2.13989	0.876784	2.44312	1.9432	1.50503	1.67659	1.42898	2.44041	2.26721	1.78873	1.48265	1.84861	2.59222	1.7824	2.17232	1.48901	1.61058
Acp2	ENSMUSG00000002103	-0.904793	-0.659035	-0.92348	0.1776	0.667373	0.461198	0.887875	0.100974	0.721397	-0.880592	0.0361636	0.26342	0.875124	0.999931	0.802972	1.90903	2.22997	0.617279	1.42481	0.102832	0.509316	1.76074	1.42541	-0.204916	2.32082	-0.348614	1.25718	0.835147	0.770547	0.466585	0.733423	2.42466	0.882668	0.992913	1.53833	0.0986532	1.20334	0.0820044	1.2517	0.539181
Slc39a13	ENSMUSG00000002105	0.730703	-1.1664	0.402773	0.18045	0.670983	0.120051	0.676263	0.481308	0.999571	0.663452	0.458319	0.97106	0.918254	0.999931	0.494946	-3.33243	0.871046	0.478835	0.173177	1.24586	0.735203	-0.850749	-2.45044	-1.93434	1.85913	1.10393	-0.100375	-1.11824	1.20473	-0.600343	-0.914248	1.57801	-0.410084	-0.418154	-2.68333	-1.97952	-0.290449	-2.78912	2.18564	0.767552
Celf2	ENSMUSG00000002107	-0.0917074	0.0268903	-0.12069	0.634337	0.921423	0.90384	0.977859	0.54168	0.999571	-0.10999	-0.514055	0.463584	0.956152	0.763598	0.372689	2.7487	2.89319	3.01024	2.79678	2.79808	3.02107	2.73308	2.44017	3.04173	3.13887	2.87556	2.33552	2.47695	2.57397	2.54585	3.01807	2.68236	2.97116	2.90583	2.72815	2.40453	2.79442	3.19852	3.32186	2.74054
Spi1	ENSMUSG00000002111	-0.990768	-1.05194	-0.725064	0.167486	0.6519	0.300591	0.846056	0.136445	0.79711	-0.725859	1.3052	-0.747951	0.837989	0.880887	0.304058	0.487054	1.34467	2.15004	0.0573901	0.552771	-0.863519	0.887574	-1.70646	1.08297	2.17945	1.06254	0.998429	0.00597668	0.483775	0.858906	3.18814	1.28217	0.138713	0.598024	0.208354	1.74112	0.755187	1.93795	-0.449533	1.01907
Sf3a1	ENSMUSG00000002129	-0.40173	-1.54032	-1.66765	0.553798	0.892637	0.161164	0.740344	3.48102e-05	0.00514611	-0.407393	0.362233	0.00262788	0.94643	0.999931	0.999081	1.6965	1.80369	0.796567	0.279556	-0.413819	0.324568	1.60779	1.03055	0.491883	-0.983238	-3.26048	-0.899827	1.9252	0.721285	-2.06657	3.03255	0.253321	-0.773423	2.5591	-0.415851	0.398949	0.0975915	-1.08968	1.39301	1.23758
Stat6	ENSMUSG00000002147	-0.174465	1.00828	-1.28545	0.758275	0.951095	0.140061	0.710846	0.0252836	0.397201	-1.80787	-2.1389	-1.27641	0.138733	0.195795	0.431678	0.143137	1.70287	1.10673	0.534042	0.869146	1.20614	-0.3919	0.965268	2.94271	-0.80302	-3.19242	-0.247273	1.83228	-3.19201	-1.44977	2.17128	0.800858	-0.671289	1.11924	0.181806	-0.190402	-1.69921	1.69065	-1.96959	2.03594
Clgn	ENSMUSG00000002190	0.889372	0.201379	0.363586	0.17505	0.663998	0.852045	0.968931	0.561106	0.999571	-0.391421	-0.0648948	-0.155207	0.942554	0.999931	0.952165	-0.315248	-0.725902	-1.69901	-2.30151	-2.58693	0.319773	0.26002	-2.56662	-1.0002	-2.91213	-1.18461	1.45257	-3.64202	-3.45376	0.488056	0.607446	-0.275854	0.655439	0.0130813	0.815937	-1.58022	-0.0467304	-2.98893	-0.344774	-0.742631
Napsa	ENSMUSG00000002204	1.4654	0.470801	0.730344	0.00148703	0.0537596	0.680266	0.931978	0.255354	0.952284	-0.778758	-0.334012	1.26356	0.85745	0.999931	0.325235	-0.872929	-0.291648	0.422993	-0.700222	-0.105164	2.10229	-0.134665	1.46719	1.00618	-0.802538	1.98172	-0.476979	-1.43113	-3.12253	-1.05939	-0.668601	0.673346	1.56802	-0.86497	0.961042	1.09136	1.48564	0.324206	1.74651	-0.344793
Vrk3	ENSMUSG00000002205	0.136955	-0.712907	-0.822656	0.804742	0.962102	0.45257	0.884759	0.0269681	0.412973	-1.37008	1.14692	1.39195	0.605905	0.963011	0.203021	1.54109	1.03847	1.81047	-0.285085	1.23842	0.811457	-1.07333	-2.09352	0.542511	2.02006	0.970128	-0.718204	-0.684515	-0.0337885	0.0507028	-0.814022	0.874762	2.83232	1.4743	-0.42905	1.81689	1.7318	-0.49536	2.00266	1.18643
Smg9	ENSMUSG00000002210	0.647116	-1.7237	-0.0245144	0.227211	0.716067	0.0935987	0.60566	0.974796	0.999589	-1.82547	0.489027	0.598522	0.0663375	0.999931	0.776662	0.320048	1.98396	1.55465	-0.696447	0.781954	1.46919	-0.578247	-2.46203	0.673457	-1.66989	-0.11576	1.23415	-2.1554	-2.92957	3.04085	1.69625	0.970935	1.13215	2.63443	1.98348	0.39548	1.39648	1.56179	1.31923	0.412886
Paxip1	ENSMUSG00000002221	0.271102	-1.17769	0.173966	0.621516	0.916453	0.257637	0.833395	0.765037	0.999571	-2.25253	-0.167328	-0.542132	0.0111064	0.999931	0.609871	-0.663342	1.56573	1.40937	-0.248058	-2.05328	0.755012	1.12928	0.822446	0.0931873	0.599511	-0.930878	1.04222	-2.03533	-0.858038	1.14248	-1.30974	0.338606	1.44586	-0.637434	-0.55894	0.0650659	-0.548718	-0.11184	-2.14482	1.77422
Rmnd5a	ENSMUSG00000002222	-0.74798	-0.603788	-0.571048	0.227917	0.716524	0.434399	0.880593	0.354076	0.999571	-0.146063	-0.446112	0.884095	0.972444	0.999931	0.464861	2.52356	2.59062	1.34649	2.30743	1.13471	1.59258	1.6136	2.80997	0.745854	2.7338	1.48305	0.530772	1.24555	2.09971	2.54401	0.792514	1.62704	1.06587	2.54891	2.63334	1.19816	2.81209	2.53672	2.78665	1.77674
Rhoc	ENSMUSG00000002233	-0.433666	-0.12702	0.81637	0.360699	0.806519	0.896144	0.976773	0.167362	0.841993	0.29942	0.399144	0.863498	0.970882	0.999931	0.650021	0.329464	0.0915431	-2.46277	-0.584878	-2.69754	-0.689514	0.125097	-2.79734	0.25428	-1.57768	1.56831	1.07775	-2.12282	0.315131	3.36659	-1.46793	0.646423	2.08878	1.61202	0.175579	0.0646811	1.6492	1.5144	1.0776	0.126419
Ppard	ENSMUSG00000002250	-0.898326	-2.33803	-0.073851	0.0115103	0.175562	0.000240032	0.00904548	0.911873	0.999571	-1.33389	1.08772	-0.795416	0.749637	0.787433	0.360326	-0.0319765	0.724489	1.66217	-2.41826	0.924965	-3.64088	-1.95152	-2.19778	-1.85638	-1.54725	1.32936	1.16219	-0.941755	-0.102145	-0.386559	-1.25397	1.28122	1.94832	-0.472787	0.350439	0.884145	0.708015	-3.18162	-1.22856	0.828541
Def6	ENSMUSG00000002257	-0.272865	-0.267133	0.536371	0.471706	0.857802	0.769655	0.954252	0.44089	0.999571	0.423061	0.492464	0.238664	0.951756	0.999931	0.919946	-0.993215	1.50909	-1.57061	-0.00231748	2.24288	-0.984589	-0.185324	1.44029	1.36979	-0.228596	1.48604	1.46429	-0.682646	1.63622	-0.278857	-0.0633985	2.00051	-0.0892531	0.133307	0.971185	1.69059	2.08768	-3.42418	2.32688	0.567293
Peg3	ENSMUSG00000002265	0.87008	1.43078	0.00556492	0.120134	0.582071	0.0481104	0.42905	0.994498	0.999862	0.921116	-0.123728	2.68844	0.874469	0.999931	2.20307e-06	0.379159	-0.273525	1.57434	0.78587	1.04423	1.97778	1.23797	3.1233	2.248	0.453215	0.747604	0.452634	-1.51758	1.96415	1.07469	1.44649	1.10772	1.70578	0.545669	1.05559	2.44808	0.676334	3.02244	2.67428	2.46699
Lmf1	ENSMUSG00000002279	-0.215129	-0.636787	-1.09513	0.776468	0.953386	0.606176	0.917178	0.045413	0.53629	-0.502431	-0.150467	1.21317	0.950856	0.999931	0.368615	2.09407	1.90414	-1.36977	0.0292885	0.0236386	0.528602	-1.21116	1.18906	1.51359	2.18713	-3.38447	-0.330031	-0.689841	0.331744	-0.354654	-0.711212	1.69088	-0.540334	0.196543	1.22007	1.38897	1.49408	2.6042	2.32065	1.13407
Narfl	ENSMUSG00000002280	0.617819	0.482621	-0.668311	0.268706	0.747114	0.66855	0.929712	0.248089	0.950228	0.203779	-1.87455	1.1789	0.973406	0.402474	0.333345	1.13394	1.43353	0.694638	-2.14075	0.458702	1.11608	0.923827	-2.4575	2.31709	-1.14958	0.453177	-3.20329	-1.32922	1.21742	-0.868261	-0.867159	1.25101	2.98947	0.615777	-2.67781	-2.09855	-0.63418	-2.9144	1.64408	0.838409
Angptl4	ENSMUSG00000002289	0.41097	0.35868	-0.177231	0.305258	0.773612	0.717147	0.941955	0.561657	0.999571	1.34329	-0.420427	-0.216207	0.241663	0.999931	0.799727	-3.24457	-0.511317	0.476966	-0.198735	1.03966	-0.456863	1.56539	2.36522	1.12421	-1.35321	-2.72649	-3.16438	-1.57165	2.44848	-1.50458	-1.39357	-1.75069	1.76486	0.392263	1.16689	-1.69694	-2.92077	-1.0875	-1.66497	-0.211817
Dbf4	ENSMUSG00000002297	-0.904755	1.1477	-0.16619	0.0372435	0.332162	0.235831	0.822915	0.804458	0.999571	-0.681684	-1.02644	-2.68153	0.918254	0.957065	0.00104846	-0.30392	0.440649	-0.761964	-0.217297	0.438801	-2.53677	-2.62623	-0.0305134	0.116751	-0.443325	-2.57429	-2.73222	1.05933	-2.58313	-1.28828	-3.23319	-2.83727	-3.38659	0.142679	-2.45645	-0.710654	-2.56456	-2.79924	-3.37066	0.602961
Daxx	ENSMUSG00000002307	-0.196585	-0.582682	-0.429865	0.651537	0.928728	0.529538	0.899147	0.288079	0.976917	-0.417996	0.0642917	1.02599	0.926038	0.999931	0.514748	1.39933	1.91615	1.81219	1.63319	1.55014	1.72321	1.62862	1.42509	1.21261	3.10136	1.89113	-0.28693	0.492776	1.55696	0.850401	1.34169	1.31023	2.26524	1.17691	1.60407	1.39078	1.25939	2.07931	1.85606	1.70599
Cd320	ENSMUSG00000002308	1.15744	2.27281	0.216604	0.104588	0.545948	0.000224987	0.00873511	0.683026	0.999571	1.00953	-0.488549	-0.538029	0.781557	0.999931	0.656328	-1.30025	-2.84361	0.248661	-1.24014	0.640181	0.336365	-0.0164662	1.65012	1.91272	-1.12017	-2.96777	1.0145	-1.33009	1.35427	-0.997795	-1.03059	0.426998	1.74785	-0.554905	0.483372	2.51727	-0.716524	-0.299941	-1.56828	-0.0271241
Ipo4	ENSMUSG00000002319	-0.0715462	-2.27912	-0.950781	0.909582	0.983836	0.00267127	0.0629907	0.172894	0.850622	-1.96227	1.26307	-1.42571	0.112756	0.796779	0.417008	-1.09091	1.89088	0.565062	0.861041	0.97299	0.540565	-1.99461	-2.36563	-2.75792	1.10161	0.237836	-3.23765	1.50317	-1.34883	-1.35686	-1.92126	1.03784	1.53149	0.752417	-0.88304	-0.254323	0.609546	-2.89887	-2.13959	-0.238127
Tm9sf1	ENSMUSG00000002320	-0.0354431	-0.00225323	-0.00057106	0.954908	0.991499	0.998195	0.999852	0.999352	0.999862	-1.39389	-0.0812308	-2.52	0.634367	0.999931	7.43561e-06	1.36758	-0.0858746	2.6084	0.714487	1.44827	1.32934	0.0317856	1.69305	1.58207	1.63112	-0.340816	1.25985	3.58435	-2.93804	-0.920668	2.20903	1.02784	-1.32254	1.48256	0.695547	0.979813	0.275434	2.46307	-1.26121	0.713578
Irf9	ENSMUSG00000002325	-0.542824	-0.831686	0.476386	0.457782	0.849346	0.471711	0.888583	0.356842	0.999571	-0.70276	2.29682	-0.550127	0.926038	0.241854	0.748965	1.44557	1.97145	1.11214	2.54579	1.91684	1.4177	1.19114	2.22802	1.32629	1.6057	2.41036	2.07844	1.47727	0.27986	1.52772	1.23323	1.67509	2.44378	2.35717	1.67109	3.26738	1.3683	2.66457	1.49218	1.27917
Mdp1	ENSMUSG00000002329	-0.368735	0.491964	0.504092	0.543369	0.889233	0.598726	0.916188	0.19314	0.892984	0.474131	-0.489715	-1.02526	0.942554	0.999931	0.495724	1.67223	2.03967	0.634341	2.48327	2.08679	1.95405	0.676718	2.98214	2.24628	1.04762	1.51803	2.57126	1.65679	1.69982	1.43453	1.69443	1.5176	1.7112	0.17819	3.34503	1.39283	2.88364	0.211293	1.37466	1.01995
Dhrs1	ENSMUSG00000002332	0.0460045	-0.423853	-0.0967387	0.910792	0.984287	0.711734	0.939936	0.879775	0.999571	0.319028	0.347392	0.226377	0.953638	0.999931	0.912493	1.796	0.665805	1.76981	1.46039	2.05228	1.67011	1.73855	1.19542	1.02211	1.28791	1.95103	-0.617015	2.12497	1.88523	-0.25654	2.40087	1.49721	2.27786	0.691756	1.35472	1.21804	0.567715	1.26545	1.85442	1.39818
Ncan	ENSMUSG00000002341	-0.263874	0.760923	0.925861	0.748905	0.951009	0.351286	0.856563	0.160994	0.82936	0.376065	-0.30493	-0.754893	0.956375	0.999931	0.656768	1.24922	0.0221041	0.908098	0.471498	1.08337	0.396819	0.808197	0.826629	1.37313	0.824197	1.15261	2.30057	0.797721	1.21134	1.42022	0.723984	2.3322	1.4106	1.63649	0.702522	0.977556	0.92815	0.517052	0.740435	2.066
Tmem161a	ENSMUSG00000002342	-0.366004	-0.185663	-0.332333	0.359789	0.805578	0.874233	0.972966	0.475488	0.999571	-1.58138	0.0194362	1.12908	0.359232	0.999931	0.366773	-1.03428	2.08139	0.908434	-0.10296	2.05447	-0.278923	-0.399068	0.747578	1.09353	2.82795	-0.450295	-0.611084	-1.47284	-2.84135	-1.37272	-1.24082	1.35213	-1.45901	1.69333	-1.5825	1.02928	-0.706708	-0.649874	1.96229	0.51934
Slc25a42	ENSMUSG00000002346	-0.694033	0.470534	0.243112	0.337739	0.795169	0.591963	0.915004	0.665365	0.999571	0.0424535	-0.220326	-0.0260795	0.994211	0.999931	0.980701	1.76708	0.78221	1.18656	1.40372	0.103296	1.03297	0.946688	1.50183	1.33761	-0.352084	1.48532	1.65796	1.04246	0.898629	1.22615	1.33506	1.60585	0.971137	0.544271	-0.300691	1.19385	1.25193	0.974011	1.22291	0.907618
Snx9	ENSMUSG00000002365	-0.194888	-0.584825	1.10742	0.607914	0.910541	0.369538	0.863388	0.133588	0.792564	-0.0647418	0.72294	0.149511	0.989993	0.983942	0.956646	-3.24432	-0.667401	-1.17772	-1.45069	-2.40637	-1.22441	-0.981014	-2.60357	-3.61413	-2.42301	0.821994	-3.14705	0.397118	-1.18894	-2.71846	0.119084	-3.64105	-1.91212	-3.37468	-1.55666	-1.073	-1.97135	-0.555035	-0.0753737	0.90355
Ranbp3	ENSMUSG00000002372	-0.548815	-1.28178	0.82738	0.492215	0.867602	0.0987934	0.621828	0.14881	0.810826	-0.085799	1.0801	-1.16876	0.990192	0.892217	0.479172	1.09637	1.97725	0.0863175	1.29845	1.76532	0.811998	0.384053	0.717377	0.165438	0.246551	1.01379	2.20733	2.19755	1.27983	0.525609	0.272303	1.68033	1.59899	1.17591	1.39169	0.178607	1.18306	-0.454929	1.82668	0.66936
Ndufa11	ENSMUSG00000002379	-0.168873	-0.465285	-0.324636	0.749757	0.951009	0.552964	0.907132	0.412561	0.999571	-0.414514	0.273753	-0.921369	0.884374	0.999931	0.487132	2.30091	1.84898	2.43743	1.42564	1.90325	1.6565	1.51761	1.27142	1.65511	1.84901	1.49582	2.33263	2.02304	2.09682	2.02119	2.0172	2.88677	1.8039	1.86212	1.73352	1.69014	2.40641	2.23803	1.76946	1.23885
Nr2f6	ENSMUSG00000002393	-0.790987	0.947541	0.357581	0.260515	0.740384	0.379663	0.865966	0.636724	0.999571	0.542382	-1.47922	-1.32686	0.942554	0.725395	0.492561	0.472278	-0.574232	-3.26147	0.428824	-1.62096	-0.684105	-1.7093	-2.20209	-0.445083	1.09253	0.799815	-0.749901	1.20303	-0.606585	-1.16309	-1.31602	1.31702	-0.657966	-3.81771	-1.43819	-3.08578	-0.643087	-2.76836	-2.19748	1.18838
Use1	ENSMUSG00000002395	0.503436	0.795484	0.588251	0.261179	0.740513	0.159287	0.737648	0.233399	0.937742	0.333232	-1.14153	-0.376774	0.943372	0.389748	0.756222	2.48283	2.19661	2.02436	1.92789	2.10122	2.32283	2.25075	1.86341	2.44266	2.6273	2.26539	2.33556	2.26449	2.09978	1.7732	2.12266	2.12308	2.7346	2.15656	2.05522	2.10621	1.99446	2.56018	2.22036	2.13478
Braf	ENSMUSG00000002413	-0.777679	0.741721	0.280048	0.170706	0.65663	0.547263	0.905898	0.747604	0.999571	1.1951	0.808449	-1.23418	0.818771	0.999931	0.53504	-0.144057	-0.326967	0.0385883	1.41248	0.959646	-0.257665	0.308231	2.62604	-0.0703607	-1.44055	1.3461	-3.00527	0.510429	0.876106	0.982591	2.25832	-0.29189	-1.44542	-0.532312	1.251	1.32863	0.19527	-0.18698	-2.96706	0.455954
Ndufb2	ENSMUSG00000002416	-0.169822	-0.0236661	-0.0088966	0.41114	0.829221	0.962521	0.988946	0.968478	0.999571	0.0131459	0.401885	-0.428239	0.995319	0.999931	0.606521	2.41725	2.47987	2.72706	2.8719	1.43525	2.61817	3.18667	3.09785	1.61898	3.19731	2.81931	2.3665	2.4386	2.40868	2.10943	2.957	1.77344	2.30243	2.15671	2.6022	2.90286	3.0536	2.30837	2.0866	1.9432
Hltf	ENSMUSG00000002428	0.472166	-0.0957732	-0.239033	0.499865	0.870949	0.92093	0.979902	0.731459	0.999571	-0.626458	-0.763655	0.30181	0.93977	0.999931	0.891545	1.14945	0.813018	1.36297	-0.884873	2.03674	0.706349	0.615506	-2.02973	1.7426	-0.330603	0.863661	1.16038	-0.730196	0.369505	-0.15769	2.41306	1.22156	2.67988	0.301874	1.42652	1.13	1.24508	-0.497374	1.77743	-1.55901
Prpf6	ENSMUSG00000002455	-0.958824	0.77939	0.164137	0.132373	0.607467	0.101483	0.630838	0.680462	0.999571	-0.160021	-0.798849	-0.69399	0.972444	0.832766	0.549435	1.70828	2.17088	1.18008	1.8156	1.05897	0.955453	0.587647	0.681397	2.60474	1.63228	1.35966	2.26252	1.87546	1.65798	1.69714	0.195894	0.964854	2.35804	1.68843	1.10043	1.82509	2.2213	1.0008	1.48239	2.10716
Rgs19	ENSMUSG00000002458	0.349323	1.2955	-0.855444	0.569684	0.897246	0.059659	0.481068	0.228316	0.93344	-0.839813	-2.15886	0.662811	0.916104	0.0290775	0.750091	1.93223	2.06338	0.699464	0.488883	1.17945	1.79436	0.714612	1.62346	2.63028	1.80203	-0.826753	0.974481	-0.509096	0.238018	-0.312345	1.10156	0.977028	1.26258	-0.477221	0.884175	1.00677	0.396875	0.236877	1.35285	1.5213
Rgs20	ENSMUSG00000002459	1.02456	0.393557	0.985326	0.0473051	0.37723	0.704578	0.937898	0.0914315	0.699774	1.44189	-0.289134	1.77875	0.537482	0.999931	0.00202922	-0.726232	-3.12325	-0.103967	-1.01121	-2.74708	1.01376	-0.682131	-2.37886	-0.125483	-1.57214	-1.34711	-0.707734	-2.31082	1.06016	1.93247	-1.32866	0.13025	-1.09451	1.21695	-3.53774	-3.06106	2.38741	0.0999634	2.38118	0.0527935
Snrpd1	ENSMUSG00000002477	-0.330631	-1.51584	0.0274422	0.576245	0.901248	0.144308	0.717929	0.959881	0.999571	0.275968	1.61931	-0.401683	0.951756	0.479281	0.708613	2.34562	2.2493	1.67034	1.68748	1.61443	1.61444	1.58045	2.34705	1.74077	1.7206	2.00732	0.621595	1.31238	2.19426	1.50786	2.296	1.87474	2.16786	1.57563	1.95274	2.32151	2.12761	2.11013	1.20699	2.15885
Tchp	ENSMUSG00000002486	0.696571	-0.575221	0.762446	0.281523	0.759964	0.626026	0.921059	0.232874	0.936854	0.180526	2.23907	0.846025	0.982164	0.148727	0.506673	-0.68722	-3.32038	0.704693	-1.70804	-1.57092	0.483193	-0.271816	-2.76174	-3.83794	0.920456	-0.736552	0.484562	-3.30028	-0.763628	0.354375	0.599894	-0.757162	-1.76874	1.12926	-1.48775	-0.26546	1.13713	-2.58336	1.23918	-2.11583
Tiam1	ENSMUSG00000002489	0.255699	-1.9409	0.371969	0.681421	0.933578	0.018801	0.243316	0.614046	0.999571	0.48175	0.220549	0.391902	0.942554	0.999931	0.852341	0.556114	1.05797	1.4047	0.857452	-1.9242	0.634444	2.18413	-2.30171	-1.41713	2.48736	0.74386	1.88218	-0.442351	1.1357	0.17058	3.33192	-1.46452	1.72645	0.926528	1.47831	-1.46414	0.907488	2.11622	2.59402	-0.309853
Tsc2	ENSMUSG00000002496	0.468844	-0.431888	-0.820948	0.44137	0.842902	0.688213	0.93387	0.177104	0.857926	-0.510007	0.542388	1.08582	0.912489	0.999931	0.492561	0.567016	0.531264	2.9481	-0.00564603	1.25567	1.26335	0.961993	2.49551	1.07289	1.03203	0.760019	-0.0113666	-0.922836	1.95865	-0.602561	1.27711	1.55463	1.70795	-3.08306	0.753027	1.68593	-0.176906	1.99805	1.64561	2.04606
Slc9a3r2	ENSMUSG00000002504	-0.441671	0.926132	-0.773268	0.477027	0.861893	0.079077	0.555995	0.148063	0.809921	-0.991723	-2.958	-0.012257	0.880482	0.000104919	0.996485	-0.517734	1.40901	1.05914	-1.0277	0.870806	-0.0395842	-1.15558	-2.71221	2.5555	-1.50002	1.29129	-3.1226	1.13043	0.30604	1.03026	1.28496	0.0420082	-1.44142	0.498172	-0.199598	-2.90113	1.47002	1.32022	0.462431	0.0358742
Puf60	ENSMUSG00000002524	0.949238	-2.30153	-0.0240462	0.0315356	0.307386	0.000336964	0.0118824	0.975167	0.999589	-0.910939	2.56208	0.634975	0.875027	0.0390462	0.747754	-1.58386	1.74686	1.7411	-0.189978	1.28465	1.6118	0.918728	-1.8195	-1.16785	0.00575637	0.471703	1.78105	-0.00385629	0.629635	0.681108	0.307478	1.29661	3.24668	1.73613	0.718455	3.0143	0.47302	1.0535	2.54664	1.62635
Golga2	ENSMUSG00000002546	-0.438842	-0.666674	0.304354	0.583743	0.903527	0.586913	0.913383	0.655301	0.999571	0.675438	-0.132273	-0.126404	0.907915	0.999931	0.95581	1.20636	1.43879	-0.179417	-0.103254	0.662228	0.373747	0.556737	-2.61267	0.587682	-1.32558	1.42488	0.787656	2.14896	2.04829	1.52545	2.70423	2.12569	1.91694	0.797819	1.59506	0.133177	1.42	1.65821	0.700853	1.1222
Uck1	ENSMUSG00000002550	0.331529	-1.82639	-0.277111	0.644263	0.925112	0.0115099	0.176553	0.479013	0.999571	0.383435	1.48979	1.49166	0.951756	0.559398	0.0759603	-0.911702	0.89148	0.55831	-2.28523	-2.16208	-0.69956	2.12127	0.735596	-2.65476	-2.77674	-0.176008	-3.0044	-2.4264	0.936595	-2.26886	2.08414	0.0389079	0.30892	1.15907	-0.667304	-0.0421993	0.873487	-2.73198	1.08877	-0.555205
Mien1	ENSMUSG00000002580	-0.369361	-1.2199	-1.01152	0.629717	0.919583	0.164431	0.743664	0.00738077	0.205796	-1.08604	0.463806	-0.774733	0.711003	0.999931	0.229588	1.27334	1.99288	1.94125	1.16916	1.50737	0.495729	1.51872	1.76372	1.26056	1.44646	1.67137	2.08778	0.592738	1.38014	2.05343	0.734453	1.52786	1.6126	0.863445	1.36966	1.30522	0.645427	1.49677	0.564016	1.66129
Axl	ENSMUSG00000002602	-0.272826	-1.44027	0.126619	0.519733	0.87939	0.110453	0.649811	0.735926	0.999571	-0.332236	0.217508	-0.342693	0.943372	0.999931	0.777856	2.53202	2.53504	1.91147	2.20599	0.36744	1.92451	2.03913	2.4361	1.35938	1.71285	2.09741	2.11857	2.26216	1.6948	2.31807	1.52874	1.59132	1.89801	2.43513	2.17182	1.34583	3.14795	1.71082	2.12856	2.37079
Tgfb1	ENSMUSG00000002603	-0.716505	-0.0709299	-0.362544	0.223763	0.715507	0.905196	0.977859	0.621757	0.999571	-0.85797	-0.309736	-1.55011	0.89041	0.999931	0.26438	0.548407	1.18342	1.28096	0.180218	0.731706	-0.875322	0.882197	0.507602	1.21146	1.03533	0.582603	0.816632	0.97297	0.668615	1.07351	1.02457	0.535156	-0.428748	1.33677	0.463521	1.17333	0.649885	0.928694	-0.709175	0.851965
Ccdc97	ENSMUSG00000002608	-0.44512	-0.0268419	-1.58229	0.455062	0.848557	0.973251	0.992027	0.00362831	0.135838	-0.590278	0.682253	0.681298	0.91481	0.999931	0.643525	1.62144	1.52176	1.11176	0.885029	0.386371	0.712711	1.35157	0.781981	1.03975	1.42358	-0.860187	-0.38341	-0.27811	1.37453	0.0709847	-0.135166	-0.870342	1.94472	0.779492	0.224528	1.51285	-0.115255	0.0949521	1.20471	0.578323
Akap8l	ENSMUSG00000002625	-0.527604	0.207772	-1.36364	0.509186	0.875766	0.521736	0.898027	0.00382836	0.142402	-0.514472	-1.9417	0.213019	0.900795	0.0533252	0.926793	0.135965	1.64121	1.47858	0.597867	1.31661	0.510294	0.444443	0.0521357	1.64638	0.86644	-0.328038	-0.302791	-4.63488e-05	1.85515	1.55693	0.561995	0.326817	0.235883	0.801332	0.196846	-0.0583636	0.263184	0.120866	0.0626023	1.61801
Pdcd2l	ENSMUSG00000002635	0.707127	-0.541343	0.109646	0.21047	0.70153	0.46776	0.888383	0.821879	0.999571	1.42168	0.907183	-0.661138	0.293613	0.92491	0.629076	-1.05647	-0.899402	0.58438	0.519263	-1.54656	0.459241	-0.658254	-2.64989	-2.22929	0.164913	-3.87393	1.53531	-1.56407	1.05592	-1.12867	0.729985	1.56696	1.44117	1.13897	-2.973	-2.28238	-1.50224	-2.6086	-1.72093	-0.164118
Gtf2f1	ENSMUSG00000002658	-1.29895	-0.604961	0.192369	0.0087343	0.149976	0.63748	0.922883	0.807755	0.999571	0.381208	-0.000985608	0.976797	0.953849	0.999931	0.579467	1.55717	0.906304	-0.25381	-0.139592	-1.46454	-1.88294	-0.713415	-2.21419	0.537837	0.791934	0.374745	0.672585	-1.0592	0.573353	-0.323931	1.09494	-2.27206	1.81542	0.318497	1.29911	0.395099	1.1219	0.493317	1.85333	1.84641
Clpp	ENSMUSG00000002660	-0.421505	1.67333	-0.357219	0.532982	0.885157	0.0464297	0.423226	0.651182	0.999571	-0.826541	-2.33329	0.648861	0.918254	0.148727	0.767882	0.584604	2.32579	0.00961531	-0.929396	0.540753	-0.0043106	-0.51895	1.34396	3.28882	1.24086	-0.960599	1.41726	-1.31483	0.348609	2.71423	-0.0501935	0.721036	0.0335801	1.96631	1.04077	0.657602	1.60952	0.952208	1.88876	1.12759
Alkbh7	ENSMUSG00000002661	-0.893332	1.5598	-0.745488	0.0359626	0.326781	0.0600693	0.48146	0.150338	0.813107	-1.16374	-2.00919	1.5223	0.799	0.299624	0.178948	0.010074	1.20277	-0.649423	-1.74763	0.0729396	-3.37714	-1.39018	-2.25559	2.53729	-1.3439	-3.3206	-0.63815	-2.12597	-0.866891	-1.68606	1.60661	-0.167146	-1.09558	-0.414471	-0.584003	0.0175388	-2.29234	1.71406	0.877126	1.21704
Dennd1c	ENSMUSG00000002668	-0.84879	-2.07844	-0.559692	0.155597	0.638046	0.00255916	0.0615886	0.423426	0.999571	-1.39319	1.478	0.779726	0.686081	0.678006	0.378101	2.05107	1.56779	-0.181803	1.64164	-1.58914	0.714464	0.66384	-2.59736	-2.90675	1.88837	-0.102608	0.641083	1.24157	-0.588372	-1.72784	-1.15913	-2.93371	2.59189	0.260349	-0.779114	-0.0287602	-0.056843	-2.6389	2.78563	-1.19286
Prkd1	ENSMUSG00000002688	-0.0297999	1.38375	0.508504	0.963537	0.993166	0.172976	0.75811	0.443181	0.999571	1.81782	-0.179149	-0.14371	0.136089	0.999931	0.957706	0.104329	-3.00189	-0.393478	-0.161848	-0.166043	-0.010813	0.288218	0.509349	0.218074	0.0179186	-0.0753539	0.32177	0.391247	1.6505	0.266194	0.984756	3.51253	0.395123	1.85229	0.0492692	-0.428195	0.562536	2.59646	0.09662	-0.00110535
Lcp2	ENSMUSG00000002699	-1.20465	-0.0640252	0.380131	0.0991341	0.536674	0.938407	0.984423	0.42419	0.999571	-0.0908168	-0.0503142	-0.233687	0.986046	0.999931	0.865218	3.09555	1.03446	1.32256	1.41874	0.531862	0.220241	0.60931	0.697256	0.976879	1.90011	1.89689	2.31956	1.04563	1.32369	1.91653	0.827053	1.84197	0.962572	1.47449	0.372629	0.862578	2.39449	0.288143	1.46825	0.681609
Cse1l	ENSMUSG00000002718	-0.220118	-0.970566	-0.167278	0.601216	0.908723	0.262826	0.837829	0.609817	0.999571	-1.08637	0.179312	-1.62871	0.702407	0.999931	0.037497	1.59063	1.99586	2.1749	1.26871	0.658378	1.64871	2.24245	0.82333	1.43667	2.13405	1.80822	2.54203	2.1974	1.10139	0.952224	2.34856	2.44405	2.85174	1.85496	1.63336	1.51287	1.96954	2.49984	0.435114	0.945096
Naa20	ENSMUSG00000002728	-0.134232	1.62749	0.0165644	0.8186	0.96526	0.0404656	0.38949	0.980223	0.999589	1.47336	-0.518742	-0.602167	0.615867	0.999931	0.748358	1.50592	0.12254	0.805237	2.15154	1.44748	1.71624	1.06678	2.45384	2.07147	1.45565	0.776527	0.971	1.29019	1.53132	0.80057	2.13466	2.72792	1.13413	1.60897	1.16808	1.05374	1.52788	1.5541	0.720654	0.823079
Fkbp7	ENSMUSG00000002732	-0.620484	-1.49557	-0.785185	0.0858715	0.502659	0.0513714	0.443609	0.0714119	0.647493	-1.37438	1.97134	0.250621	0.55061	0.282183	0.867871	-0.987325	1.35308	-1.32082	-2.02	-0.117329	-3.14822	-1.71851	-2.71449	-3.64808	0.610854	-0.750995	-3.11953	-0.100843	-3.12537	-3.19068	-2.21973	-0.916045	-2.19748	-3.07549	-1.40633	1.15916	-2.65006	-0.468547	-0.29444	-0.746024
Plekha3	ENSMUSG00000002733	0.174808	-0.783836	-1.17703	0.818916	0.965464	0.528212	0.898464	0.0325279	0.457414	-0.0335947	-0.101325	-1.42612	0.995335	0.999931	0.41002	1.69734	1.86318	0.910483	-0.0918228	1.42905	1.23944	1.48332	-2.39889	1.97856	-0.24134	-0.921946	-0.796319	2.72745	0.739314	-0.0982237	3.7105	-1.06157	-0.0907395	1.68771	-1.26841	1.78864	-1.13331	1.06292	-0.641293	0.337781
Ykt6	ENSMUSG00000002741	-0.865219	-1.18355	-0.0948508	0.240551	0.727837	0.309463	0.846056	0.883557	0.999571	0.200891	0.488232	1.07912	0.971751	0.999931	0.489628	1.92989	1.7222	1.46845	1.54103	2.18445	0.662451	1.03204	1.34078	1.67312	0.312421	1.88291	-0.17786	0.572137	1.88308	0.829251	2.25723	3.00316	2.9691	1.95027	1.42978	1.63375	1.07162	2.31	2.01185	1.34311
Baz1b	ENSMUSG00000002748	-0.200961	-1.05559	-0.158126	0.666992	0.930545	0.274272	0.840621	0.635464	0.999571	-0.514566	0.17566	-0.376571	0.878394	0.999931	0.767529	1.98213	1.92506	2.6699	1.63473	2.31897	1.59231	1.75901	2.08085	1.51667	1.03934	2.16855	1.49969	2.07996	1.88611	1.78272	1.88236	1.56241	2.0286	1.9781	2.29669	1.50469	2.04618	0.919761	1.87596	1.80852
Pex6	ENSMUSG00000002763	1.19909	0.877992	0.242226	0.00371975	0.0914286	0.432083	0.879973	0.655273	0.999571	0.770347	-0.11795	0.0694746	0.918254	0.999931	0.972495	-0.857053	-0.803166	-1.19332	-0.815579	-1.85117	1.18725	0.499204	0.990506	-0.521882	0.464542	-1.22045	0.107401	-2.10873	-0.595265	-1.55904	1.5382	1.88512	-1.39783	-0.404818	-0.298005	-0.846818	1.81359	-2.7838	0.321338	-0.280292
Mrpl2	ENSMUSG00000002767	-1.0642	-1.7048	0.0861747	0.000356586	0.0218712	0.0800448	0.558827	0.884692	0.999571	-0.216976	-0.0301074	0.477403	0.95659	0.999931	0.813293	-1.34684	1.91185	2.65299	1.02072	2.43042	-2.93707	-2.02369	0.382974	2.24373	-1.13764	1.93714	0.689034	-0.881674	2.83134	-0.774271	-1.12992	-1.10928	2.19982	-0.878197	-1.04246	1.28576	0.721947	-1.30074	1.97002	0.0761905
Mea1	ENSMUSG00000002768	0.06051	-0.685246	0.433875	0.937943	0.988263	0.583599	0.913383	0.563978	0.999571	0.896261	2.35421	0.939087	0.880466	0.160687	0.593951	0.0743998	0.711605	0.678557	1.28153	0.684115	0.678714	1.72288	1.80233	0.438842	0.849681	1.75517	0.788525	-1.19643	1.62944	1.06175	1.57034	0.776067	1.45394	0.92596	0.250632	2.23572	0.306901	0.726054	0.984067	1.06652
Kdelr1	ENSMUSG00000002778	-0.4545	-0.434979	0.0490734	0.36845	0.810166	0.521536	0.898027	0.881614	0.999571	0.0658418	0.0200174	-0.231033	0.982164	0.999931	0.821602	2.16896	2.42103	2.56228	2.53988	1.7758	1.85776	2.03336	2.68078	1.77387	2.42141	2.35867	2.44516	1.93018	2.28854	2.16693	2.45048	1.91327	1.50091	2.1615	1.70489	1.67171	2.41965	2.02851	2.19942	2.03045
Tmem143	ENSMUSG00000002781	0.420315	2.52351	0.159697	0.530483	0.884557	1.80339e-08	3.35401e-06	0.812768	0.999571	0.661683	-2.3362	-1.38261	0.926038	0.0120474	0.396037	0.169218	-0.649046	-1.03096	0.467373	1.20305	1.20947	-2.58925	-2.27144	1.36524	0.623066	-1.26674	-3.28122	0.851737	0.303274	-1.56986	-1.97701	0.0902115	2.03752	-1.12476	-0.756036	-0.731511	0.304174	-3.00096	-2.41287	-0.607551
Pdxk-ps	ENSMUSG00000002791	-0.212252	0.721183	0.230903	0.493783	0.867602	0.506421	0.894136	0.624171	0.999571	-0.150436	-0.0652074	-1.57058	0.972444	0.999931	0.272024	-3.02998	-0.409273	-1.74909	-2.13594	-0.643346	-2.87108	-2.08685	-2.96696	-1.51402	-1.01831	-0.46361	-3.02256	-0.96565	-2.86101	-3.37273	-0.6488	0.517113	-3.28434	-2.88428	-3.19381	-1.39436	-1.42551	-3.13846	-3.34485	-3.34481
Ggct	ENSMUSG00000002797	0.793872	-0.144543	-0.747256	0.209677	0.701184	0.907375	0.978479	0.254615	0.952284	-0.822538	-0.988109	-0.280908	0.902307	0.999382	0.776586	0.893162	0.0446931	0.203161	-1.11966	0.804965	1.02457	-0.583463	-1.7676	0.989711	-0.458174	-0.395187	-3.49435	-1.07588	-1.33079	-0.217097	-0.0018527	0.0754689	0.396887	-1.01962	-0.0603604	-2.52065	-0.90656	-3.26468	-1.51744	0.89193
Epdr1	ENSMUSG00000002808	1.36574	-0.59044	1.43606	0.00303779	0.0824207	0.506567	0.894248	0.000246736	0.0233206	1.45636	1.21758	0.645797	0.416352	0.879312	0.767882	-0.824327	-0.591162	0.0814468	-0.546112	-0.0756873	1.45299	1.09506	-2.04419	-2.33482	0.16571	1.2888	2.35875	-1.30258	1.25248	-0.682826	0.746153	0.919858	3.45868	-0.735881	0.810875	0.856196	1.02555	-3.31811	2.25292	0.0725778
Flii	ENSMUSG00000002812	-0.0841622	0.586307	0.232237	0.918445	0.985381	0.588648	0.913845	0.787349	0.999571	0.750101	1.05951	0.0858167	0.923641	0.680708	0.9619	1.41485	0.0910987	0.437259	0.462562	0.850479	0.532145	1.04435	1.12535	0.800014	1.14003	0.9203	0.183459	1.03009	1.69064	1.10619	0.490071	0.870617	1.29488	1.16106	1.66071	2.12698	1.11149	1.3936	1.04111	2.06061
Atg4d	ENSMUSG00000002820	1.0104	-0.705881	1.32845	0.0707512	0.461966	0.406032	0.871872	0.0465446	0.543225	0.815183	0.360814	-2.1767	0.920074	0.999931	0.0154212	1.9972	-3.02359	0.94532	-1.04116	0.199207	1.72187	1.82915	0.595774	-0.88914	1.25996	1.24269	2.08642	1.15408	0.0926999	-0.547807	2.24325	1.68623	1.06948	0.686366	2.15154	-0.892755	0.0669586	-0.691317	-0.744296	-0.498239
Qtrt1	ENSMUSG00000002825	-0.129246	0.465147	-1.09333	0.864026	0.97317	0.596076	0.915831	0.0366396	0.488429	-0.257059	-1.32484	-0.230217	0.974377	0.777572	0.782186	1.67199	-0.396949	0.0357923	-2.48623	0.750323	0.461122	-1.84915	-3.13053	0.260223	0.292401	-3.37342	-2.92181	-3.05212	-0.262341	0.94088	0.332325	-3.0991	-2.66117	-3.30119	-1.05645	-0.54386	-1.74621	-2.60738	-3.0299	-0.654334
Plin4	ENSMUSG00000002831	1.55147	0.621788	0.182489	0.000164135	0.0132352	0.481355	0.889313	0.530413	0.999571	0.443974	-0.950652	-0.237866	0.89041	0.977539	0.784918	-1.00655	-2.8147	-2.20172	-0.965479	-1.345	2.24752	-0.982528	-2.72047	0.591238	-2.35706	-0.339152	-3.13948	-2.03538	-0.409942	1.78793	-2.40933	-2.15737	-0.00674913	-0.41192	-1.9449	-2.10836	-0.0854287	-3.44609	-2.10954	-1.58732
Hdgfl2	ENSMUSG00000002833	-0.258443	0.408651	0.208846	0.749087	0.951009	0.693072	0.934457	0.783835	0.999571	-0.62364	-0.400209	0.0433576	0.943372	0.999931	0.982876	1.79667	0.323804	0.620359	0.354332	0.662961	0.491127	0.716859	1.33584	1.0115	-0.448723	1.32566	0.296478	1.07904	-0.0367537	-0.237258	1.18973	0.860101	1.5251	0.47606	1.61488	0.740492	1.07386	0.219581	1.09874	0.684964
Adprh	ENSMUSG00000002844	0.198207	-0.112808	0.240053	0.54314	0.889233	0.887794	0.975432	0.544382	0.999571	0.260388	-0.0519381	0.45428	0.953849	0.999931	0.623754	1.9783	1.89275	1.97516	2.44646	2.08894	2.71037	2.51082	3.16666	2.35418	1.75598	2.69142	1.77105	2.09074	2.33295	2.05038	1.79022	2.19168	2.47928	2.39468	2.1671	1.95707	2.30987	2.08446	3.06781	2.33008
Tmem39a	ENSMUSG00000002845	-1.12045	-0.823634	-0.164534	0.0175022	0.223003	0.26505	0.838973	0.834331	0.999571	0.276716	0.881712	1.06325	0.972214	0.892245	0.520809	2.27674	-0.755016	-0.398313	-0.201694	-2.39187	-3.05902	-1.81097	0.324037	-2.62023	-2.33853	-0.0505411	-0.139558	-2.79193	-0.0991739	0.610173	0.208198	0.376506	-2.1999	-3.09711	-2.66349	0.201718	-1.4311	-0.455292	0.479359	1.85589
Mcm2	ENSMUSG00000002870	0.522569	1.02761	0.0112821	0.462151	0.851217	0.308286	0.846056	0.976115	0.999589	1.68409	-0.379102	0.927668	0.0586001	0.999931	0.441714	-0.375856	-0.386821	-2.51432	-0.309159	0.512763	-0.560851	0.439885	0.700738	0.358198	0.0877542	-0.587222	-3.03665	-2.3028	1.18204	-2.18803	0.231157	0.24762	0.428632	-0.291774	0.0684414	-0.0317169	-0.358501	-2.92745	0.626197	-1.1406
Tpra1	ENSMUSG00000002871	0.150388	-1.23406	-1.37513	0.832543	0.96816	0.246221	0.825928	0.00265502	0.10818	-1.32011	-0.0906363	-0.325757	0.657935	0.999931	0.742309	0.899654	1.49892	2.57348	0.881495	2.19949	1.03876	-0.69891	0.740285	1.71915	1.68649	-0.598903	-0.608736	0.341818	0.950803	0.486422	-0.72727	0.0563878	1.51307	1.99401	0.0573874	0.0918747	0.638497	0.429495	0.23594	0.619328
Nab1	ENSMUSG00000002881	0.959857	0.78697	-0.188439	0.0549897	0.408758	0.298021	0.846056	0.819722	0.999571	-0.294717	-0.420241	1.13034	0.972075	0.999931	0.0203047	1.32211	-0.548348	0.106517	-1.31636	0.446293	2.11566	0.774122	-2.81122	0.539454	0.603221	-0.507273	0.311901	0.551485	-0.25767	0.226151	0.63435	-0.0414957	1.57171	2.2148	1.32395	-0.333547	1.17753	0.689303	3.07022	-0.532199
Adgre5	ENSMUSG00000002885	-0.571225	-1.77638	-1.04895	0.384577	0.8156	0.0118726	0.180372	0.129675	0.784255	0.449932	1.19711	-0.33945	0.943372	0.884732	0.796595	0.69996	0.97271	1.61996	2.08913	-2.71404	1.04173	0.644501	1.78093	-1.58145	-1.89617	0.660077	-3.08956	-1.26595	2.34922	2.79801	1.30988	1.19474	1.52563	1.02589	0.947264	-1.59485	2.64518	1.68436	-1.35606	0.0653289
Il17ra	ENSMUSG00000002897	-0.841788	0.299182	-0.0524634	0.0704408	0.460865	0.249161	0.828883	0.848945	0.999571	-0.488193	-1.52063	-1.01022	0.884374	0.123294	0.342561	2.46999	2.19081	1.98988	2.68842	1.13592	1.49747	1.2116	1.47981	2.32649	2.69496	2.00563	1.69203	2.59218	1.70946	1.36551	1.27933	1.26276	1.92998	0.49211	1.17666	1.00344	1.85776	2.30834	1.27187	1.21008
Arrdc2	ENSMUSG00000002910	0.108671	1.18507	-0.32388	0.871117	0.974051	0.21534	0.802073	0.417882	0.999571	-0.464573	-2.29395	-0.185403	0.948492	0.130131	0.865658	-2.91543	0.94361	0.938886	0.480982	0.738845	0.619067	-1.39928	0.556202	3.30586	-2.20704	-2.89682	-2.94742	-1.55474	-0.014473	-1.64712	0.757016	-1.39394	0.722554	0.507018	-1.30336	-1.39938	-2.16612	2.04566	-1.50752	0.181052
Cd36	ENSMUSG00000002944	-0.676231	-0.757745	-0.186057	0.0480357	0.380361	0.531194	0.899559	0.750318	0.999571	-1.75163	0.335063	-1.35133	0.193828	0.999931	0.482383	-0.707125	0.809709	1.42628	-2.27606	-0.316398	-2.8652	-2.37462	-3.16821	0.179921	0.659008	1.18524	-0.405635	0.773607	-2.87624	0.64615	-2.09229	0.453929	-2.14513	1.68791	-2.27014	0.339913	1.49479	1.62266	-2.52517	-1.87923
Map2k7	ENSMUSG00000002948	0.150222	0.385991	0.397161	0.84327	0.96966	0.733946	0.946267	0.631812	0.999571	-0.335204	-0.162595	1.02245	0.953632	0.999931	0.531758	0.706351	-1.25685	-1.07647	-0.700557	0.341591	0.64539	-0.980922	-1.58451	-0.0200248	-1.17525	1.45036	-0.471394	-1.58088	-3.38692	-0.815528	3.00695	-0.0884125	-0.945059	-3.18402	1.41131	0.700585	0.013714	-0.94416	0.976001	-0.100683
Timm44	ENSMUSG00000002949	0.175153	1.84292	0.442012	0.820813	0.965638	0.0116021	0.177667	0.278583	0.975458	1.96198	-1.22997	-0.693762	0.0483838	0.841296	0.61525	1.48716	-2.95925	-2.25903	-0.360535	1.72513	0.27638	-0.817723	-2.31126	2.65114	-1.32647	-3.19183	1.12623	-1.43392	1.89539	-1.06002	1.88617	-2.1251	2.25758	-3.09323	1.10122	1.39605	-2.48859	-1.17276	-1.66328	-2.31394
Ap2a2	ENSMUSG00000002957	0.104259	1.72492	0.282208	0.897879	0.980161	0.0271498	0.304242	0.74319	0.999571	1.42347	-2.23203	0.157404	0.642125	0.0382262	0.941338	-0.717124	1.57377	-0.692854	0.103841	1.13255	0.0899555	0.115606	1.47202	2.06838	0.590999	0.691126	-0.349144	1.33511	1.93347	-1.63703	2.9028	2.35678	1.24335	0.032075	0.293985	0.0266135	0.304734	1.02052	0.707851	0.505475
Pnkp	ENSMUSG00000002963	-0.491925	-0.428355	-0.27678	0.501009	0.87139	0.696	0.934913	0.708271	0.999571	-0.98498	-0.181524	-0.313839	0.833305	0.999931	0.823614	-3.79242	1.08175	-0.848671	-0.286172	-0.762134	-0.175513	-4.00775	-1.80133	0.188594	-1.42325	0.741333	-3.50213	-1.67801	-3.52116	-0.966181	-1.10083	0.410192	-1.01157	-3.31273	-0.528539	0.0927912	1.0531	1.34323	-2.08722	-0.245986
Med25	ENSMUSG00000002968	-0.587638	1.04232	-0.570317	0.300273	0.77285	0.279289	0.84107	0.397503	0.999571	0.167485	-0.957854	1.3193	0.982164	0.884976	0.333383	-1.33875	1.38276	0.2839	1.2807	2.39693	-0.733386	-0.735651	1.47472	1.82899	1.32352	0.664779	-3.11759	-2.41397	1.39635	2.27796	-0.999419	1.04959	-0.870881	2.22748	0.27088	0.434286	0.683128	-0.526305	0.401457	2.03267
Clptm1	ENSMUSG00000002981	0.436754	-2.19667	-0.217239	0.442393	0.843597	0.000836339	0.0246016	0.789198	0.999571	-0.746378	1.00556	-1.35171	0.925943	0.99144	0.19002	1.34124	1.86815	1.16152	0.793124	-0.0132586	1.69008	1.57262	0.752052	0.0657547	0.970623	0.801745	1.34956	1.75494	0.39284	2.00801	1.09192	1.57447	1.29084	1.80994	1.63298	0.0719895	0.925976	2.46322	0.1522	2.13201
Relb	ENSMUSG00000002983	-1.30111	-1.04583	-0.769386	0.0727425	0.468292	0.337674	0.852804	0.0806205	0.678057	-0.331106	0.363691	1.27678	0.942554	0.999931	0.354446	0.628117	1.25566	1.99642	0.662504	0.4362	-0.640051	-0.138428	-1.89012	0.446973	0.958775	1.32344	-3.44618	-1.34299	1.20092	-0.57528	1.92448	0.434839	1.84555	1.041	-0.217491	0.0731625	1.52053	0.0138586	1.45774	-0.41949
Tomm40	ENSMUSG00000002984	-0.215316	0.395782	-0.071148	0.769257	0.95288	0.74932	0.949163	0.92193	0.999571	0.465083	0.823278	1.11744	0.951756	0.999931	0.426549	2.33745	-3.03495	-0.167162	0.0158584	0.314529	0.295891	0.164531	1.65373	0.411263	0.752725	0.0963051	-0.351053	-2.69879	0.297904	1.07785	-1.47445	0.724103	2.33738	0.130033	0.903356	1.21338	-1.01069	1.74811	0.871122	0.305069
Apoe	ENSMUSG00000002985	-0.248093	-0.0444884	-0.0255882	0.000749357	0.0354133	0.733032	0.946267	0.691286	0.999571	-0.278385	-0.0362022	-0.58764	0.561037	0.999931	3.75083e-05	4.14849	4.10332	3.81252	3.90938	3.99153	3.76658	3.77827	4.1219	3.98757	4.17987	3.62189	3.42019	4.48029	3.55457	3.37191	3.26156	4.04574	4.00239	3.91917	3.95721	3.74505	3.99206	3.10392	3.23183	3.70686
Hbp1	ENSMUSG00000002996	0.0119704	-0.706461	0.390536	0.974604	0.99501	0.401025	0.868759	0.157843	0.824945	-0.342431	0.183793	-1.10422	0.93977	0.999931	0.0580291	1.38483	2.11226	2.2753	1.78575	2.32035	2.25702	1.91828	0.352614	1.16762	1.69848	2.73259	2.50095	3.20972	2.19509	3.3791	0.836194	1.61231	1.36851	2.67847	1.12025	1.10172	2.13799	-0.212076	1.59358	2.57039
Prkar2b	ENSMUSG00000002997	-0.494077	0.829433	0.579873	0.238093	0.72554	0.419987	0.878126	0.407342	0.999571	-0.0688543	-0.780947	2.67759	0.986046	0.999931	4.011e-09	-0.565085	-2.99614	-0.302186	0.733155	-0.0932586	-0.806045	-2.19888	0.210203	-0.404454	-1.98514	-0.872832	-2.89176	-2.70161	-0.504896	0.881054	-2.05455	0.00147003	0.789379	-0.525869	-0.081712	-2.44166	-1.66169	2.25701	1.6483	0.51553
Cdkn1b	ENSMUSG00000003031	0.0948242	-0.709881	0.496255	0.900613	0.980732	0.55235	0.90672	0.473155	0.999571	-0.617041	0.462682	0.338069	0.93977	0.999931	0.749015	1.39842	1.62282	1.27363	1.12101	1.48455	1.06249	1.45118	1.52527	1.42574	1.58333	1.39601	1.87179	1.7801	0.9975	0.907778	0.939205	1.46365	1.73474	1.99303	1.67793	1.61787	1.35243	1.85317	1.98819	1.53668
Klf4	ENSMUSG00000003032	0.277132	1.84552	-0.066889	0.732883	0.94879	0.0165507	0.224298	0.9295	0.999571	0.169131	-0.0653762	1.11239	0.983283	0.999931	0.479706	0.138289	0.404246	0.644989	0.436083	0.715307	0.480294	0.834743	2.40848	2.15799	1.06557	0.818853	-0.179813	-1.08535	0.981715	1.28288	0.836852	0.990225	1.05734	2.38933	1.62438	2.08351	1.77113	0.409286	0.813847	1.26221
Ap1m1	ENSMUSG00000003033	0.267784	0.0943983	1.11307	0.721023	0.945469	0.933928	0.983197	0.0428459	0.524445	0.495697	-0.0960852	-0.577932	0.949635	0.999931	0.529313	1.1597	0.656331	1.24431	1.362	2.17192	1.4281	1.28802	2.83867	1.58251	1.64875	2.37307	2.64707	2.13337	1.52162	1.69621	1.2896	1.98227	1.52407	2.06494	3.68581	1.33995	2.87183	2.11557	1.85392	1.14033
Rab8a	ENSMUSG00000003037	-0.0975582	-0.385878	-0.687984	0.864634	0.97317	0.512968	0.896527	0.175044	0.855758	-0.73752	-0.608176	0.0692296	0.738007	0.999931	0.975303	1.9992	1.90493	2.99222	1.47712	2.2041	1.80645	1.31399	2.56412	2.18224	2.03654	1.3195	0.933945	1.8786	2.08809	1.85981	0.670844	1.70304	1.85049	1.93984	1.69449	1.2979	1.6965	2.67275	1.67331	2.13269
Hmgn2	ENSMUSG00000003038	-1.16031	-0.554285	0.416944	0.0156511	0.209161	0.660665	0.928018	0.581704	0.999571	0.194549	1.23355	-0.633133	0.97839	0.872877	0.519086	-0.302512	-3.20812	0.784404	-0.772188	-2.57497	-3.92115	-0.436482	-1.94741	-3.31379	1.1721	0.772059	0.0759794	-2.07547	0.408831	-1.31923	-1.73353	0.293597	2.48318	-3.59759	-0.566412	-0.308847	-2.33306	0.635384	-2.45633	-0.130487
Fam32a	ENSMUSG00000003039	-0.37468	-0.00907063	-0.0410124	0.407041	0.826672	0.986296	0.995795	0.915683	0.999571	-1.83683	0.559324	-0.19216	0.180557	0.97048	0.874849	1.56153	1.61191	2.02156	1.26815	0.575603	1.63151	1.22105	2.71112	1.96644	1.34195	1.85	1.62648	1.96297	-0.65619	-0.138089	1.42839	1.32839	2.2237	2.13418	2.01263	2.50693	2.68308	2.02688	1.79735	1.82162
Stard3nl	ENSMUSG00000003062	-0.770202	-1.4588	1.09357	0.265201	0.74477	0.0752267	0.543187	0.103551	0.727533	0.44858	1.79688	0.077573	0.953685	0.405179	0.975303	-0.976362	1.85657	-0.426112	0.952872	-2.69524	-0.877653	2.04821	-2.2523	-2.75366	1.53473	1.39436	2.61713	-1.87347	1.08818	2.45266	-1.344	1.16138	2.89145	1.38682	0.0472085	0.73583	0.785936	0.284647	1.30674	0.503813
Stk11	ENSMUSG00000003068	0.166117	-1.71832	0.478385	0.803038	0.960824	0.022326	0.271849	0.551016	0.999571	0.0771742	0.959958	0.166751	0.990192	0.978012	0.949398	1.29436	0.555784	0.539137	-1.07787	-1.14534	0.187189	0.26498	1.36203	-1.82166	1.52123	0.0946849	2.44494	-1.21545	0.93896	-0.806058	-1.82441	1.21196	2.5355	0.234431	1.06695	0.886646	2.52115	-2.43428	1.92773	1.11702
Atp5d	ENSMUSG00000003072	0.0314632	-1.12463	-0.381694	0.9438	0.989299	0.125857	0.686463	0.138171	0.801367	-0.254767	0.450082	-0.816861	0.906866	0.999931	0.532397	2.29518	2.64409	2.64451	1.95702	2.82122	2.13098	2.23752	1.98382	1.83493	1.94365	2.45715	2.49303	1.86905	2.4726	2.70836	2.33444	2.12223	2.10153	1.8635	1.92233	1.86699	1.59762	1.58163	1.79746	2.2153
Ppp5c	ENSMUSG00000003099	0.00696264	-0.112479	-1.45179	0.985182	0.996013	0.854337	0.968931	0.0463951	0.543128	0.192362	-0.189575	1.15552	0.953849	0.999931	0.494293	2.63576	1.81005	1.66439	1.37788	1.06657	2.17704	1.94216	1.41882	1.50201	2.35255	-0.150584	1.50947	-0.567554	2.06796	1.49803	2.4413	2.80305	2.52746	0.578279	1.75591	1.1538	0.994646	1.8911	1.53333	1.58783
Cdk12	ENSMUSG00000003119	0.445989	0.528562	-1.28476	0.398648	0.822251	0.441955	0.881131	0.0198407	0.346954	-0.227904	-1.01704	1.59973	0.972444	0.884732	0.0371091	1.48236	-3.32928	-0.19856	-2.34919	-2.05151	0.227583	0.349872	-1.82698	0.0862458	1.93822	-1.97375	-3.45466	-2.94496	0.0956288	-2.03566	-0.965632	-0.819095	-0.363867	0.678034	-1.63214	-1.12578	1.33151	1.02795	1.75396	1.20336
Lipe	ENSMUSG00000003123	-0.721702	-0.661273	-1.05665	0.240801	0.727876	0.421986	0.878209	0.0787879	0.673598	-0.746797	0.466601	0.129969	0.884374	0.999931	0.92939	2.73996	2.24123	0.742848	0.631455	-1.55166	0.647082	1.14589	0.213868	0.228254	0.925158	-0.800568	0.962283	1.19672	1.43557	0.882917	1.45858	0.319992	1.56093	0.648309	1.25107	1.34656	1.47245	3.59431	0.92872	1.0311
Pafah1b2	ENSMUSG00000003131	0.355353	0.111734	0.69789	0.573219	0.899291	0.894489	0.976511	0.205901	0.911462	0.659382	-0.378294	0.0937524	0.883427	0.999931	0.941955	2.88544	1.33338	1.80754	1.6485	2.86043	2.02459	1.73451	2.62188	2.72514	1.72965	1.81532	2.81876	1.95285	2.27104	1.7399	2.60779	2.18372	1.53502	2.19773	2.12967	1.90657	2.12559	1.87752	2.74127	1.3804
Slc2a3	ENSMUSG00000003153	0.862632	1.78088	0.706774	0.167669	0.65207	0.0156108	0.216617	0.315084	0.993702	1.0154	-1.08881	-0.60455	0.858539	0.789931	0.527791	-0.318895	-0.585682	0.322969	0.0687324	0.94573	1.16233	0.433313	1.12598	1.04473	0.976232	1.0084	0.121296	-0.142032	0.753305	0.165627	1.52438	1.46601	-0.305313	-0.014094	0.301163	0.636763	1.03269	-0.127207	-0.287632	0.652582
Foxj2	ENSMUSG00000003154	0.103612	-0.452882	-0.716408	0.828687	0.96736	0.702329	0.937442	0.318492	0.993702	0.452176	0.147915	0.149812	0.942554	0.999931	0.943955	0.852257	2.02164	-0.364783	0.854708	0.304615	1.48435	1.4153	-2.10494	0.176539	2.59165	0.632712	-3.3809	2.19408	1.89485	2.11877	-0.390005	0.228655	-0.406731	1.73909	0.4317	0.209204	1.53445	1.56756	1.36481	0.611077
Sri	ENSMUSG00000003161	-0.0693091	0.271156	-0.144543	0.821783	0.965638	0.637244	0.922883	0.718073	0.999571	0.0692628	0.020955	0.574823	0.984764	0.999931	0.342729	2.66873	2.15851	1.38253	2.77365	1.02633	2.24182	2.70946	3.01661	1.65933	3.08868	2.77179	1.01304	1.69198	1.89585	1.7836	2.05475	3.7722	2.04334	2.43226	1.89639	1.55758	2.86177	3.05262	3.15836	1.52959
Dgcr2	ENSMUSG00000003166	-0.424827	-0.723565	-0.833261	0.426153	0.835247	0.444723	0.881792	0.292218	0.978766	-0.337448	0.126914	0.575922	0.941671	0.999931	0.789555	0.184105	1.51681	2.60825	2.17184	0.703654	1.60526	0.689477	1.08003	1.1985	1.52898	-0.573277	1.66118	-0.685319	2.06984	1.86983	1.45486	1.04806	2.04823	1.77696	0.961629	1.05943	1.26206	2.72531	1.40904	1.04411
Irf3	ENSMUSG00000003184	-0.302635	-0.304794	0.326708	0.591904	0.906627	0.80658	0.961137	0.63266	0.999571	0.468616	0.225212	0.858541	0.948707	0.999931	0.621973	0.826312	1.42144	-0.0216547	1.90212	0.740753	1.24652	0.748493	-2.20753	0.406841	1.76454	1.02365	0.868872	-1.41478	0.647244	2.22111	2.04313	1.00039	3.12871	0.710429	1.67358	0.7008	-0.439756	2.13414	1.41948	2.04366
Sh3gl1	ENSMUSG00000003200	-0.54609	-0.848408	-0.808286	0.362349	0.80739	0.370619	0.863388	0.1841	0.875896	-1.58061	0.0544077	-0.732818	0.359453	0.999931	0.678128	0.198091	1.86994	2.28428	2.54949	0.58414	1.5722	-0.324977	2.25124	0.0780903	0.784277	-2.96717	1.81698	1.03185	-0.347615	0.0497227	1.16389	0.333255	1.0881	1.40734	2.48297	0.117297	0.716779	2.41635	0.161264	0.280066
Ebi3	ENSMUSG00000003206	0.410763	-2.02911	0.442425	0.454334	0.848557	0.00733836	0.131977	0.562849	0.999571	-0.472768	1.33942	0.447024	0.951679	0.64585	0.821395	0.287181	2.31887	0.971191	0.370279	-0.431593	1.51474	0.527908	-2.5063	-1.19264	-1.34619	1.43792	1.7196	-0.678717	0.580424	3.06132	1.74517	-1.22658	1.60769	1.36949	1.05182	1.35878	1.77254	0.483198	2.2781	1.2745
Ranbp2	ENSMUSG00000003226	0.0678776	-0.0347905	0.109765	0.920437	0.986135	0.976848	0.993301	0.901512	0.999571	0.85186	0.142099	-1.34547	0.918254	0.999931	0.465057	-0.895587	1.61758	-2.91798	1.55246	-2.67045	1.09186	0.344967	-2.38192	0.0618685	1.06118	0.59164	-0.702078	1.66291	1.22481	2.10627	-1.65775	0.716238	1.80525	1.44425	0.229551	-0.0478393	2.65022	0.628883	-2.22805	-0.123509
Abcf3	ENSMUSG00000003234	0.741316	-0.534827	-0.672073	0.177929	0.667727	0.585514	0.913383	0.337686	0.999571	-1.38088	1.45615	0.0128068	0.739713	0.81218	0.996364	0.911905	0.194661	2.42619	-0.332192	2.40887	2.22154	-0.403636	0.0177913	0.501435	0.940447	0.4766	-0.306016	0.939861	0.414372	1.17119	-1.02484	0.376451	1.09122	0.817142	0.471181	2.26201	1.64472	-0.415903	0.594275	0.265203
Eif2b5	ENSMUSG00000003235	0.568557	-0.700628	-0.443645	0.350136	0.802304	0.527501	0.898464	0.295045	0.980458	0.0405465	-0.0105297	-0.239314	0.994901	0.999931	0.842043	-1.10838	0.746209	-0.19242	-0.480928	-1.86263	0.065525	0.857203	2.16161	0.353379	1.82918	-1.46698	-3.23154	-1.56911	0.647649	-0.988612	-0.847727	1.74885	-0.310215	-0.766617	-0.594805	-0.35971	-0.270894	1.54624	-1.81958	1.73737
Cyth2	ENSMUSG00000003269	-0.269386	-0.404042	1.39065	0.490337	0.867602	0.487856	0.890264	0.000540305	0.0364342	1.58745	0.879107	-0.639586	0.1539	0.896127	0.427851	-1.3509	-3.09095	-0.291242	-1.7483	-3.30965	-3.83074	0.519388	-1.65631	-2.60204	-1.45581	0.895367	0.378486	-1.18579	0.976667	-0.339836	2.03501	0.683629	-0.831022	-0.795991	-0.445283	0.356356	-0.316304	1.3526	-1.65239	0.750257
Car11	ENSMUSG00000003273	0.610911	-0.953314	-0.181644	0.311298	0.776061	0.218117	0.804836	0.737229	0.999571	0.326966	1.05396	0.884504	0.969437	0.794891	0.576524	-2.94652	1.16832	-0.423559	0.532998	-3.24436	1.7782	-0.928972	-3.09075	-2.71145	-2.41759	-2.83218	-0.464409	-2.85832	0.118094	2.71306	-2.48174	-0.267532	1.12373	1.48735	-2.56557	-0.178589	-0.27153	2.03455	0.90371	0.0955365
Dlgap1	ENSMUSG00000003279	0.763068	0.420738	0.488531	0.0761139	0.477687	0.50782	0.895325	0.373479	0.999571	0.951283	0.327102	-0.26845	0.571299	0.999931	0.773824	1.07247	1.89175	1.54348	1.72383	3.0033	2.78827	1.97728	1.64911	2.17177	2.29095	1.70846	2.26425	1.75544	2.58627	2.03271	2.82155	2.73876	2.46661	2.19426	2.90351	2.97486	2.27789	2.62347	1.80715	1.9037
Plag1	ENSMUSG00000003282	-0.982205	0.501151	-0.955133	0.0841061	0.498847	0.669471	0.93034	0.146652	0.807567	-1.25361	-0.708581	-1.32161	0.72164	0.999931	0.390794	1.47967	0.377461	-1.38266	-1.5767	-2.74221	-0.785861	-1.34967	-2.62941	-0.397975	1.7156	-3.3571	-3.14465	0.335996	-3.3474	-3.00213	-2.30121	-0.653599	-2.12528	-3.24772	-4.07403	-0.608432	-2.39692	-0.716667	-3.42011	-1.16176
Hck	ENSMUSG00000003283	-1.37141	-0.520631	0.0458265	0.0494194	0.385804	0.542417	0.903642	0.896419	0.999571	-1.09838	0.0342541	-0.420934	0.817472	0.999931	0.775201	2.5876	1.99988	1.64837	2.30286	1.90755	0.620714	0.868195	2.16569	1.13806	2.33553	2.18696	1.68484	1.96885	0.613521	1.92543	0.905487	2.7295	1.03567	2.24905	1.85612	1.14179	2.10937	1.25969	1.74335	1.81429
Mrpl4	ENSMUSG00000003299	0.12386	-0.508428	-0.499297	0.801857	0.960824	0.678246	0.931978	0.509635	0.999571	-0.95146	2.10634	-0.120139	0.883427	0.412767	0.960171	1.56408	1.5465	0.188908	1.1158	0.125199	1.63418	1.42071	1.08334	0.637097	1.56901	0.116604	-0.0090117	1.40604	-0.0703805	-0.352213	-0.356364	0.853115	1.90635	1.57278	0.278189	2.0357	1.0034	0.186078	1.22603	0.521877
Keap1	ENSMUSG00000003308	0.940579	0.0179228	0.0461083	0.0939552	0.522623	0.988683	0.996828	0.953199	0.999571	0.571679	-0.217301	-0.561067	0.933396	0.999931	0.569632	-3.81728	1.47526	-0.0867971	-0.46138	0.850933	1.71914	1.60339	-1.75546	0.812952	2.68615	-0.104179	-0.536709	-0.640397	1.37759	0.132498	-0.798896	1.59226	2.58343	0.737876	1.40543	0.253952	0.795578	0.379216	-1.07082	-0.537125
Glg1	ENSMUSG00000003316	0.290483	-0.746509	-0.393142	0.6298	0.919583	0.476007	0.889188	0.534012	0.999571	-0.468585	-0.774348	0.804142	0.950205	0.999931	0.659145	-0.868177	1.01267	1.97901	0.922982	1.29841	0.91738	1.27039	-2.17397	0.977271	1.52143	1.1712	0.209195	-0.220339	0.48841	0.267191	3.14484	-1.10303	0.921531	0.774701	0.599436	-1.04705	-0.67487	0.846207	1.68627	0.64829
Csnk1g2	ENSMUSG00000003345	0.28244	-0.426959	0.325533	0.693989	0.939248	0.743511	0.948283	0.691996	0.999571	0.523608	0.101482	-0.334154	0.943372	0.999931	0.867871	-0.595365	1.39466	0.970811	1.02923	2.75702	1.14716	0.683767	0.821533	1.20428	1.91453	1.3059	-0.150113	2.30409	1.56088	0.265965	1.96676	1.19139	-0.0914188	1.63291	2.36183	-0.51263	1.1652	1.78354	1.67841	1.36763
Abhd17a	ENSMUSG00000003346	1.23668	-0.877221	-0.128443	0.0253699	0.278875	0.419444	0.877469	0.809674	0.999571	-0.918051	0.686684	0.631717	0.862735	0.999931	0.681082	-1.04985	1.73779	0.2016	-1.03207	0.865021	1.77252	1.03709	-2.47476	0.105506	-1.34653	0.124959	-0.28068	-2.0362	-0.419938	1.80527	1.40174	0.676161	0.95933	1.27564	0.761529	0.773712	0.905356	-0.763783	1.1397	-1.05581
Cacnb3	ENSMUSG00000003352	1.22593	0.828632	0.367142	0.0209447	0.248886	0.409923	0.874012	0.503456	0.999571	0.897314	0.505328	-0.44635	0.875027	0.999931	0.648635	-3.14754	-0.674495	-2.05091	0.0513456	0.72553	1.23781	0.414308	0.654825	0.318147	0.685456	-0.153175	-0.24326	-1.56049	0.131438	-1.29455	0.954581	0.322385	-1.43533	-0.710696	-2.38962	2.10643	-1.23078	-2.83317	-1.6655	0.589432
Ddx23	ENSMUSG00000003360	-0.841541	-0.856019	-1.51042	0.274811	0.752337	0.370633	0.863388	0.00114649	0.0614891	-2.57444	0.17889	1.25944	8.29657e-05	0.999931	0.323796	0.623715	2.13231	2.0009	-0.0231739	0.034448	-0.459724	0.513376	1.53577	0.273249	1.16555	0.0176689	-3.18081	-1.56205	-0.246502	-1.25056	-1.47246	0.253233	1.79537	0.132124	0.0549468	0.314181	0.261421	-0.359738	0.853	0.322497
Pld3	ENSMUSG00000003363	-0.688121	0.386176	-0.125099	0.16185	0.644439	0.445613	0.882009	0.76022	0.999571	-0.108459	-0.740206	-0.458292	0.978629	0.86101	0.725244	2.32067	2.57681	1.54477	3.15942	1.01791	1.78017	1.61015	2.65219	2.36203	1.76371	1.44602	1.82124	1.81851	2.45956	2.56852	1.85821	1.58825	1.31657	1.31042	1.41963	1.3728	2.14817	1.95324	1.31893	1.98066
Grik5	ENSMUSG00000003378	1.18343	2.30045	1.21648	0.0436688	0.362785	6.53982e-07	7.03499e-05	0.10452	0.727699	1.48989	-2.6584	0.360572	0.352023	0.00327474	0.854732	-1.02021	-0.794346	-0.860359	-0.60765	2.93533	1.05641	-2.17813	1.65098	1.26762	0.95819	1.17725	-3.11429	0.865914	0.968172	-2.3963	2.09314	0.182631	-1.2337	-3.54612	-1.10648	-0.730493	-0.829733	0.88394	1.10486	0.160427
Cd79a	ENSMUSG00000003379	0.577093	-0.698978	-0.512193	0.308388	0.775145	0.579373	0.913383	0.464365	0.999571	-1.11085	-0.683453	-0.63916	0.838419	0.999931	0.724069	0.460825	2.13136	0.182203	-0.266146	1.28721	1.94175	0.898305	-2.08222	0.826155	2.05338	-2.88353	1.2674	2.78911	0.319399	-1.57491	-1.08888	1.25942	2.1902	-0.49283	0.822144	0.469	-0.874597	1.29977	1.82609	-0.115502
Rabac1	ENSMUSG00000003380	-0.0497198	-0.709471	-0.177343	0.858384	0.971956	0.270656	0.839783	0.469925	0.999571	-0.256013	-0.0631035	-0.0157259	0.912858	0.999931	0.987062	2.07244	2.61474	2.84596	2.34845	2.45093	2.34099	2.69293	3.05399	2.32066	2.27818	2.71744	2.33743	2.49686	2.75801	2.57861	2.45155	2.48576	2.49486	2.41118	3.12104	2.33389	2.7713	2.82354	2.5283	2.62159
Etv3	ENSMUSG00000003382	-0.480087	-0.983673	-0.288534	0.537255	0.885519	0.270321	0.839783	0.452973	0.999571	-1.3631	1.33085	-0.424885	0.675886	0.87831	0.827203	1.95221	2.05231	2.76972	0.203249	1.68529	0.122311	0.490085	-2.35102	1.3255	2.11735	1.94753	1.04671	2.28816	0.143078	-0.342813	1.94393	-1.45582	2.0357	1.4445	0.827206	2.68968	1.65358	1.89611	2.17778	-0.436622
Prkcsh	ENSMUSG00000003402	-0.21642	0.827599	0.216284	0.782128	0.955964	0.295294	0.844476	0.72296	0.999571	0.202275	-1.93614	-0.714648	0.971793	0.183639	0.404618	1.02415	1.8919	0.578204	-0.383635	-0.630137	0.261875	1.37843	-2.1788	2.258	0.944494	1.71092	0.476675	-0.922767	1.51527	2.64093	1.28222	1.2882	1.79526	-0.113848	0.509322	0.522251	2.15626	0.53909	-1.20433	-0.304046
Elavl3	ENSMUSG00000003410	0.686568	1.50308	-0.0268376	0.169043	0.653885	0.0368979	0.367981	0.973533	0.999589	1.15472	-0.330379	-0.143007	0.756806	0.999931	0.906606	0.784273	0.995274	0.501147	1.14972	2.35631	2.31494	1.85401	1.27977	2.30818	1.49906	0.517822	0.70727	1.33239	1.73725	1.22307	2.41262	1.01344	1.31921	1.74563	2.31437	2.14846	0.879189	1.86039	1.14264	1.49013
Rab3b	ENSMUSG00000003411	-0.223252	-0.644969	0.0460502	0.598935	0.90823	0.375259	0.865254	0.925775	0.999571	1.12849	0.894809	1.30888	0.820814	0.886403	0.220657	-3.1732	-0.57731	0.0680612	-0.58419	-0.484855	-0.610077	-2.52007	-2.73801	-2.27416	-1.81661	0.950122	-3.10975	-2.01091	0.967454	1.34897	-1.74614	-2.29219	-1.72662	-0.799528	-2.40046	0.581863	0.456662	-0.233539	0.832543	0.0980248
St8sia6	ENSMUSG00000003418	1.13814	1.69717	-0.0344061	0.0817831	0.493653	0.0136045	0.19632	0.963069	0.999571	-0.875596	-2.21986	-1.10435	0.875124	0.119915	0.607403	-1.02549	0.582526	-0.536846	-1.63593	-0.149159	0.612606	0.780844	-2.20975	2.00697	1.10888	0.70432	-3.33304	1.23821	-0.690501	-1.29687	-1.62911	-0.061057	1.82733	-0.835831	-0.364886	0.321591	-0.551952	1.34678	-2.02248	-0.457711
Fcgrt	ENSMUSG00000003420	0.0363417	-1.06656	0.0159146	0.959125	0.992172	0.27837	0.84107	0.979988	0.999589	-0.371005	0.480438	-0.604768	0.931793	0.999931	0.643525	0.27171	1.52045	2.98609	0.699668	1.89225	0.894481	0.39414	2.21641	1.17547	1.25787	-2.78117	1.70384	-1.51644	2.42501	1.13888	0.585749	2.80682	0.492903	0.641101	-1.0235	1.20209	-0.176699	-0.643382	-1.42987	0.713071
Nosip	ENSMUSG00000003421	-0.301863	-1.47391	-1.29822	0.697935	0.940291	0.145909	0.719727	0.0072151	0.205796	0.062843	0.0400599	0.50074	0.991305	0.999931	0.789812	1.96751	1.67778	0.135442	-0.236909	0.175595	-0.00698436	0.690446	0.819266	0.286599	0.626534	-0.283751	-2.99266	1.2757	0.992733	0.829015	0.830551	0.5609	-1.57125	1.53122	1.87396	-2.76646	1.18739	0.00641871	0.886932	1.94965
Pih1d1	ENSMUSG00000003423	0.685146	-0.838885	-0.167432	0.243944	0.730318	0.44289	0.881131	0.740715	0.999571	0.47702	0.363613	1.25208	0.948492	0.999931	0.392066	-0.843952	1.89168	0.549867	0.392276	0.0953289	1.50968	1.25669	2.86927	0.659667	-0.670092	0.81255	-0.478465	-1.32676	1.60314	1.59434	1.98925	3.27919	-0.441116	0.297518	0.764826	0.776743	1.74367	2.04489	1.19053	1.72787
Rps11	ENSMUSG00000003429	-0.129513	-0.253933	0.146303	0.203809	0.694686	0.319878	0.849251	0.054168	0.578343	-0.185329	0.410238	-0.398802	0.874469	0.815418	0.00327031	3.61392	3.70268	3.65425	3.79813	3.71767	3.58692	3.80195	4.19619	3.67892	3.18964	3.92158	3.75297	3.80336	3.56192	3.99613	3.69073	3.4502	3.70997	3.78684	4.19161	4.06396	3.81404	3.7088	3.37022	3.7464
Supt5	ENSMUSG00000003435	-1.08792	-0.452673	0.0775295	0.0457082	0.371071	0.720416	0.943436	0.911145	0.999571	-0.321005	0.0196457	1.00046	0.969165	0.999931	0.559888	-0.808902	0.265094	0.853384	-0.00516028	-0.250311	-3.06356	-0.3342	1.0454	-0.0362396	-2.04824	2.13449	-0.0423497	-2.56234	-0.0743694	0.699386	0.687568	2.22171	0.509563	0.128676	0.00775332	-0.2303	0.0640576	-0.318482	-0.0638827	1.31278
Paf1	ENSMUSG00000003437	-0.666518	2.23797	-0.345522	0.296607	0.769919	0.00144208	0.0383211	0.67895	0.999571	0.71776	-1.35151	1.22499	0.926038	0.126438	0.36205	0.341889	0.540627	0.439341	0.882181	2.3904	0.0463665	0.0168271	1.0161	1.95104	0.187476	0.450566	-0.32882	-1.36437	0.0918928	0.428515	2.22281	0.949952	0.538792	0.324666	2.02892	0.540147	0.0505894	0.596282	0.7615	0.121573
Timm50	ENSMUSG00000003438	0.628934	-0.221976	0.196566	0.342589	0.799799	0.713268	0.940333	0.684623	0.999571	1.7887	0.925673	1.31671	0.11238	0.97214	0.173007	-3.20119	-0.68462	-2.81611	-0.595965	0.552313	0.417483	-0.0210889	-2.6622	-2.71424	0.020714	-0.558872	-3.11781	-2.18576	0.942387	-1.84793	2.34369	0.431254	-1.26423	-0.586875	-0.541161	-0.0732349	-1.08945	-0.440264	1.18595	-1.78232
Bicd1	ENSMUSG00000003452	0.258425	-0.505666	0.137087	0.654118	0.928733	0.597335	0.916183	0.844519	0.999571	0.244259	1.03642	1.10461	0.956152	0.87801	0.143658	1.54571	1.37386	1.71398	1.15202	3.37796	1.83298	1.28339	2.04987	1.52352	1.29444	0.86648	2.69284	1.04897	1.96556	1.12822	1.7729	3.08565	1.75494	1.9368	1.68589	2.02667	0.974827	0.481412	3.27293	2.6251
Ncstn	ENSMUSG00000003458	0.0855532	-1.6011	-0.757785	0.852963	0.97146	0.136767	0.704507	0.0910607	0.699774	-0.757045	1.42697	1.38034	0.890705	0.787335	0.282536	-0.283308	1.63215	2.16562	1.23027	0.707651	1.72137	-0.221162	2.72807	0.865485	-1.40362	0.573806	-0.328701	-1.47434	0.9889	1.81211	1.36282	0.91044	1.32561	1.21447	1.21983	1.59429	1.93092	2.73319	1.07157	0.961914
Cyp4f18	ENSMUSG00000003484	-0.248798	0.686307	-0.238929	0.623244	0.916743	0.318359	0.848825	0.571406	0.999571	-0.862003	-1.05227	-0.890264	0.883427	0.80337	0.613876	2.24508	0.251766	0.0948282	1.65851	0.187557	1.27911	-0.785578	-2.5692	0.750398	2.67873	2.1899	0.984934	1.64628	-0.347664	2.00144	-1.37733	0.187398	1.37139	-0.0197885	-0.434075	0.274313	1.7965	-0.453116	0.443894	0.00937958
Impdh1	ENSMUSG00000003500	1.06398	0.535171	0.577721	0.0488886	0.3841	0.643863	0.92412	0.456424	0.999571	1.42003	1.14633	2.15429	0.62118	0.900759	0.0518866	0.0827179	-0.108248	0.742938	0.83841	0.879451	1.97653	1.38602	1.32758	0.793196	0.822435	0.404191	0.775545	0.697887	1.92018	0.919349	1.92663	2.27279	1.28157	0.983804	0.767004	1.35893	1.20623	1.09502	2.12694	0.779506
Dusp3	ENSMUSG00000003518	-0.415755	-0.410581	-1.19328	0.572807	0.899133	0.631841	0.921059	0.00914957	0.226403	-0.321706	0.157652	-0.413211	0.934298	0.999931	0.68333	0.818001	1.57688	1.66519	0.623476	0.600194	0.456244	1.10072	1.89381	0.801979	2.0333	-0.796901	-0.15559	-0.299149	1.70493	-0.00455356	2.10708	0.927072	-0.0337648	0.979502	0.588379	0.978024	1.03324	-0.15614	-0.432823	1.47027
Slc25a1	ENSMUSG00000003528	0.369512	0.98956	-0.185084	0.633603	0.921423	0.364807	0.863157	0.770275	0.999571	-0.23606	-1.59176	1.22127	0.962639	0.620927	0.375584	-0.308995	-0.41535	-0.235481	-0.546371	-1.02492	0.354683	-0.186195	-2.38281	0.106266	-0.613868	-0.602573	-0.339621	-1.72948	-2.90984	-1.481	1.86456	-2.22987	-0.697995	-2.87035	-0.098409	-2.16097	-2.12242	-0.51258	0.751576	-0.514419
Ddr1	ENSMUSG00000003534	2.08951	1.68383	0.903228	4.87852e-11	2.81271e-07	0.0326809	0.346046	0.118413	0.76138	1.7542	0.703013	-0.44641	0.165346	0.999931	0.816606	-0.274053	-2.87629	-0.226616	-0.803225	1.1704	3.15061	2.11499	0.299943	1.11189	0.377345	-0.319556	2.2167	0.736346	1.96562	0.903607	0.387932	0.56524	1.70032	2.14626	0.617642	2.05352	0.439319	-0.0996992	0.87528	0.196976
Ier3	ENSMUSG00000003541	-0.247823	0.187324	-0.396179	0.745488	0.950981	0.837873	0.966303	0.547423	0.999571	-0.229155	-0.942059	-0.348943	0.970091	0.801296	0.867871	1.09583	1.81439	1.31776	0.651275	1.62055	0.611471	1.01552	0.869701	1.93332	-0.0103912	1.46755	-0.658497	1.92115	1.22098	0.430121	2.04124	1.18622	1.76367	1.61149	1.71498	1.04569	1.30753	1.1795	0.0255118	1.38627
Fosb	ENSMUSG00000003545	0.137818	-0.15404	0.275178	0.832215	0.968011	0.901475	0.977456	0.663092	0.999571	0.463989	0.034295	1.20055	0.942554	0.999931	0.387661	-1.04033	-3.00341	2.5579	-0.861881	2.26726	-0.50227	-0.417318	3.07753	0.661458	-1.07981	1.34793	-0.499596	-1.6034	1.73445	-1.12516	-0.866525	1.04474	2.36096	1.72579	1.96463	0.313591	2.10187	-3.39532	1.71731	0.674169
Klc4	ENSMUSG00000003546	0.27185	-0.381829	0.102816	0.689897	0.93734	0.488335	0.890264	0.821339	0.999571	0.515305	0.959262	-0.306893	0.943372	0.872877	0.875113	0.699229	-0.00520264	-0.866943	2.33006	-3.10289	1.65534	-0.990567	2.56984	-0.862498	-1.75305	-2.9679	0.94448	-0.859673	0.85164	-0.86042	-1.7603	-0.863964	1.48382	0.40811	-0.839566	-0.859538	1.29453	-0.6802	2.753	0.186001
As3mt	ENSMUSG00000003559	0.0707778	-0.942717	-0.247092	0.914184	0.984543	0.251895	0.830739	0.706583	0.999571	0.46592	0.847201	-0.751943	0.950205	0.999931	0.596431	-0.945284	0.835988	-0.344455	1.4409	-2.59588	0.936719	-0.199426	-2.03273	-2.54914	1.26982	-3.81288	1.28016	-1.40857	0.71942	-0.711727	-1.42336	-2.6153	2.13153	-1.21197	-0.0927526	0.17279	0.513307	-3.15217	-1.75887	-2.58023
Rnf215	ENSMUSG00000003581	-0.799732	-0.815756	-1.10357	0.23706	0.725092	0.305614	0.846056	0.00207897	0.0904625	-0.853913	-0.0128876	0.747151	0.464942	0.999931	0.698531	2.07269	2.19211	1.97152	1.4566	2.10652	0.73448	1.27534	1.73408	1.35302	1.93048	1.39996	1.0766	0.477108	1.70012	0.683469	1.76637	1.43583	1.93271	0.873557	1.87072	1.14953	1.51401	0.267716	1.61123	0.633903
Sec14l2	ENSMUSG00000003585	1.14746	-0.151	-0.0880587	0.0400813	0.344688	0.894548	0.976511	0.812151	0.999571	0.693161	0.315126	1.28238	0.926038	0.999931	0.32598	-3.34727	-3.212	1.56843	-0.986655	2.01124	0.768837	-2.12931	-2.44079	0.00957925	-1.2119	-0.0437121	-3.21025	-2.01174	0.0983189	-1.54064	2.31522	-2.80317	-0.546938	0.0953538	-0.420367	0.299948	-0.71552	1.5788	1.073	-1.41811
Cp	ENSMUSG00000003617	-0.341861	1.43271	0.934948	0.630007	0.919583	0.0931288	0.604573	0.118581	0.76138	0.100328	-0.024947	0.151531	0.983912	0.999931	0.957276	-0.0259125	-0.729096	-0.220472	1.85948	0.307872	0.256935	0.547227	1.46145	0.419522	2.05256	0.23993	2.23532	-2.44368	-0.0240963	1.13056	-1.67145	0.289107	1.08717	1.62377	0.0998565	0.39028	0.743486	-3.14987	1.42682	-0.328181
Crot	ENSMUSG00000003623	-1.04706	-1.09497	-0.342738	0.143942	0.622653	0.209094	0.797336	0.44512	0.999571	-0.829656	-0.391031	-1.52963	0.597249	0.999931	0.261694	2.08028	1.89515	2.53114	-0.110591	0.393984	-0.131703	1.83956	0.430663	0.523758	1.46828	0.799408	2.19158	2.31266	1.47952	-1.90615	1.47816	0.503005	1.52207	-3.0802	0.127225	0.428051	-0.314493	0.192955	1.07765	0.0890426
Rps6ka1	ENSMUSG00000003644	-0.49093	-1.01064	-0.563379	0.432911	0.83832	0.240041	0.823218	0.108339	0.736257	-1.04162	1.80907	-0.311012	0.476804	0.598213	0.868952	1.09723	1.48347	2.48381	0.193009	1.41803	0.235385	1.41998	-2.43886	-0.45787	2.4113	0.856061	0.608845	0.939505	0.561743	-1.06572	2.08119	1.16489	2.61988	0.61534	-0.0667054	1.25178	-0.675604	1.45368	1.82209	0.0826133
Snrnp200	ENSMUSG00000003660	-0.346655	-0.903375	-0.0776577	0.624507	0.916882	0.42375	0.878209	0.917569	0.999571	0.816724	0.0387546	1.78565	0.880482	0.999931	0.0468932	-0.166355	2.28025	0.834193	0.42805	0.126907	0.182691	0.48052	-2.53689	1.47322	-1.18275	0.222844	0.335258	-0.607967	1.96937	-0.340257	3.21108	-1.09512	1.58695	0.431335	-1.26799	1.53575	0.0709402	1.96884	3.07131	0.0576953
Ciao1	ENSMUSG00000003662	-0.504444	-1.10486	-1.45502	0.393157	0.81944	0.269233	0.839783	0.00339694	0.128849	0.1731	-0.0699001	0.189676	0.976558	0.999931	0.888057	1.76374	1.84017	0.236872	-1.129	1.74266	0.145763	-0.709385	-2.64641	0.446015	-1.35108	-2.76585	-3.16938	1.65481	2.1906	-2.70229	-1.37707	0.763109	1.78717	-2.78902	-2.83401	0.368585	-2.8512	-1.03044	1.15156	-0.035507
Taf6l	ENSMUSG00000003680	0.17604	-0.765215	0.211756	0.659233	0.929264	0.503846	0.893341	0.636664	0.999571	0.456378	1.88489	-0.103954	0.939404	0.49177	0.952165	1.79388	1.58345	1.18622	1.83017	0.899243	1.98829	2.31717	1.17468	0.938403	1.29204	2.61005	1.265	1.70444	2.03	1.96207	1.61444	1.60752	2.66885	1.8493	1.3945	2.41036	2.06803	0.899847	1.5166	1.75362
Insig2	ENSMUSG00000003721	-0.33788	-0.727083	0.757516	0.678305	0.93269	0.543228	0.903676	0.247803	0.950228	0.990571	0.091419	-0.0446894	0.755848	0.999931	0.975957	0.125642	1.7705	0.680833	0.938707	1.11495	0.282785	1.75195	0.619413	1.01113	0.688391	2.74521	2.78019	1.38484	1.71903	1.4992	3.28966	1.54633	1.95822	1.87309	3.31063	1.04815	1.73513	2.97508	1.81974	2.26436
Kpna6	ENSMUSG00000003731	0.903079	0.288436	0.182308	0.0598233	0.426871	0.783126	0.958013	0.757509	0.999571	1.26522	-0.281335	1.59254	0.569428	0.999931	0.0863273	-0.553776	0.144711	-2.67696	-0.609729	-1.98427	1.02058	-1.50698	1.60663	0.65681	-2.79118	0.473051	-3.10298	-2.03919	1.20666	-1.68949	0.333776	1.03782	0.762847	-3.48473	0.202571	0.138512	1.95904	-0.0822675	1.32374	1.54393
Man1a	ENSMUSG00000003746	0.454122	-0.441909	0.807917	0.460884	0.851217	0.717287	0.941995	0.185557	0.878507	0.123356	0.348447	-1.22436	0.983394	0.999931	0.413275	1.58298	0.97492	1.43417	0.057595	1.47596	1.0731	2.24977	-2.11694	1.20226	2.19181	0.710356	2.21816	2.90504	1.59367	-0.517795	2.51357	1.69258	2.5002	1.72078	0.739939	1.63685	0.738157	1.79497	2.00695	-0.303307
Itpkc	ENSMUSG00000003752	-0.491899	-0.31148	-0.829761	0.463708	0.852795	0.723713	0.943888	0.0845594	0.686817	-1.69474	-1.80471	-0.282147	0.206288	0.479884	0.856276	-0.0791796	1.1436	1.27243	0.171996	-2.9736	0.626922	-0.339345	-2.32783	0.85728	-1.78404	1.63863	-3.27304	-2.34592	-3.44234	1.63642	1.45456	-0.103846	-1.38507	-3.29706	-3.5383	-3.10205	-2.19887	1.49066	-2.5835	1.38491
Brd8	ENSMUSG00000003778	-0.649118	-0.135846	-0.0307711	0.155768	0.63852	0.761014	0.952206	0.912358	0.999571	-0.529648	0.327503	-0.338172	0.907082	0.999931	0.65704	2.3623	2.18383	2.59346	2.80048	2.69914	1.84151	1.65797	2.43608	2.20909	2.03701	2.20269	3.19463	2.17739	2.0125	2.25168	2.15778	3.05048	2.62454	1.8792	1.92281	2.54523	1.73915	2.0663	2.02474	2.65327
Kif20a	ENSMUSG00000003779	-0.493222	-0.393293	0.0602087	0.271812	0.749823	0.476448	0.889188	0.90699	0.999571	1.55327	1.32096	-0.483258	0.399551	0.646112	0.649794	1.76176	-0.205818	-0.757687	1.40528	0.150803	-2.49003	1.43768	2.83825	-0.735129	-2.03752	-2.4233	0.221965	-0.866332	2.20395	-0.981517	1.21646	2.86632	1.0167	2.44111	-0.293858	-0.688694	-1.30613	-3.56275	-0.88338	-0.776902
Farsa	ENSMUSG00000003808	-0.665712	-0.942898	-0.167319	0.38564	0.8156	0.404032	0.87017	0.767801	0.999571	-0.124541	0.853699	1.02904	0.982164	0.999931	0.527236	0.863691	1.88842	1.35489	1.05019	0.321187	0.58572	0.733034	0.536986	1.12323	1.3074	1.77082	0.591578	-0.77304	1.33051	1.94518	1.23756	1.93959	1.30099	0.0994688	0.838689	1.75617	1.97599	2.61419	1.37478	0.652036
Mast2	ENSMUSG00000003810	0.954354	2.61995	1.45743	0.142191	0.622486	2.68028e-09	8.17454e-07	0.00105557	0.0590865	0.752848	-2.04967	0.938878	0.903618	0.338609	0.57257	-1.2182	-3.21359	-0.521336	-1.11116	1.10271	-0.0394086	-0.890921	-2.13326	2.11344	-0.85283	0.674986	0.555582	-1.69918	-0.529625	-1.04761	-0.485104	0.794736	3.12039	1.8994	-0.580376	0.471419	-0.759137	-0.31504	1.61629	0.68736
Dnase2a	ENSMUSG00000003812	-1.86131	-0.507993	-0.601935	4.65865e-05	0.00516528	0.579813	0.913383	0.294546	0.980206	-0.116546	-0.6652	-0.632221	0.978968	0.999931	0.52711	1.18166	1.78285	1.77064	1.13574	-0.166929	-0.644509	0.487114	-1.93558	1.42099	2.03671	0.71641	0.164055	-0.301238	1.22717	0.423335	2.47234	1.04708	2.56374	0.70648	0.637593	0.729797	1.50995	1.99159	-0.679796	-0.741316
Rad23a	ENSMUSG00000003813	-1.65289	-0.878104	-2.06652	0.000970572	0.0409951	0.388198	0.865974	3.00314e-09	2.66379e-06	-0.978825	-0.676474	-0.229044	0.795085	0.999931	0.844932	1.58222	1.11509	1.78643	-1.46825	-3.62864	-3.54146	0.258502	-1.88128	-0.259567	0.173484	-0.820805	-3.47072	-1.88351	0.386868	-1.23116	0.394789	0.015159	0.762885	-3.26231	0.285548	-2.99041	0.40462	1.20534	-2.26346	-2.09743
Calr	ENSMUSG00000003814	0.10916	-1.15529	0.285699	0.71946	0.944993	0.135602	0.702058	0.320287	0.993814	-0.00534027	1.05559	-0.305412	0.997967	0.540451	0.693849	2.81608	2.42438	2.53001	2.13722	2.26236	2.40331	2.66606	3.02733	2.18859	2.4101	2.53405	3.11705	2.47521	2.53763	2.6708	2.37342	2.52978	2.53174	2.21383	3.12847	3.07675	2.90071	2.59308	2.59069	2.73758
Nfat5	ENSMUSG00000003847	-0.153336	-0.171368	0.00875452	0.680922	0.933505	0.673079	0.931035	0.983875	0.999589	-0.130214	0.228275	-0.438559	0.957281	0.999931	0.638466	2.17865	2.05057	2.22473	1.61446	2.57883	1.62474	2.18479	1.2509	1.62823	1.88246	0.757476	2.80479	1.59226	2.0055	2.14394	2.4299	2.88649	2.42865	2.25503	2.39239	2.21774	1.27884	1.03234	1.27928	2.17717
Nob1	ENSMUSG00000003848	1.16459	2.31992	1.63715	0.0483512	0.381092	3.47136e-05	0.00192443	0.00565434	0.17646	0.261644	-1.5188	-0.260148	0.964985	0.412767	0.892954	-0.678952	-0.177444	-0.261673	-0.18641	0.291883	1.58479	0.379518	0.204093	2.39118	1.45912	2.0054	1.41423	0.327344	-0.07682	0.646953	0.163045	0.398159	0.3338	-0.57181	0.258057	2.08046	1.83327	2.0347	0.460772	-0.299702
Ppfia3	ENSMUSG00000003863	0.843332	1.60537	0.851267	0.217937	0.709665	0.0216449	0.267224	0.232193	0.936854	2.10256	-1.90497	0.108243	0.00909398	0.394423	0.962602	-2.83561	-3.01553	-1.55487	-1.21044	-2.78666	0.972219	-1.18044	-3.24545	0.113918	-4.0718	0.838971	-2.8949	-0.863647	2.02549	-1.00923	0.497864	-0.64811	-0.897936	-2.96847	-4.23201	-4.31955	0.225502	-2.85349	-1.15142	-1.8228
Bax	ENSMUSG00000003873	-0.296359	-1.88864	0.142447	0.655847	0.928733	0.0117812	0.179221	0.835958	0.999571	-0.375287	1.25415	0.551274	0.949635	0.806003	0.554476	0.919603	0.825051	1.12	1.14725	-1.94413	0.765907	1.75281	0.915847	-1.63406	1.04386	0.865135	1.0374	1.55512	1.42413	-1.16793	-1.01137	-1.63802	2.79891	-0.303127	-0.167699	0.243794	0.0500359	0.516476	2.28078	1.04858
Il7r	ENSMUSG00000003882	1.64671	0.342083	1.89222	2.58023e-06	0.000595984	0.765267	0.953246	0.00057442	0.037669	1.59778	0.440798	-1.82707	0.179036	0.999931	0.083452	-3.41794	-3.19967	0.107374	-1.51416	-2.39822	1.23978	2.75654	3.32691	-0.263553	-1.81049	1.29848	1.13593	1.55085	1.41722	-2.06319	2.04486	0.0149504	-1.14203	-0.850127	-0.380971	-0.102448	1.29417	-2.9936	-2.83472	-1.02291
Tfam	ENSMUSG00000003923	0.714435	1.31551	-0.179508	0.218378	0.70994	0.080061	0.558827	0.813889	0.999571	1.05689	-1.99887	-0.599301	0.741264	0.0707613	0.740761	2.01045	1.86682	0.806556	0.824261	2.78247	2.47214	0.654549	0.472857	3.72141	0.976469	-0.100652	2.51473	1.68545	2.19236	1.23652	2.97376	1.41181	0.859804	-0.0256274	1.79026	1.18002	1.53864	1.74454	1.58284	0.508127
Efnb3	ENSMUSG00000003934	1.61412	-0.0236562	-0.00371532	7.2155e-05	0.00729842	0.977803	0.993659	0.992003	0.999862	1.55001	1.22578	-0.235938	0.179888	0.8691	0.800805	-0.883805	-0.629121	-2.05599	-0.212262	0.00902895	1.54619	1.73546	-2.40129	-1.88889	2.33555	-0.848625	-3.23667	-1.17453	1.22857	-0.737131	0.639336	-1.92982	1.0856	-1.01592	0.298322	0.976587	-2.13417	-0.418139	-1.39236	-0.970403
Mmd	ENSMUSG00000003948	0.373016	-1.46776	0.0863214	0.461043	0.851217	0.0426293	0.4016	0.89757	0.999571	0.49514	1.28957	-0.890361	0.947565	0.836636	0.643053	1.41268	1.14937	1.03918	1.62367	0.674525	1.93777	1.93663	3.11711	-0.77517	1.07888	-0.581714	2.08085	1.91878	1.67383	-0.53304	1.45641	1.7082	1.37262	-0.606411	1.60335	1.11573	-0.210149	0.709318	1.61726	2.22672
Hlf	ENSMUSG00000003949	0.873761	-1.00252	-0.241518	0.037203	0.332162	0.356361	0.85877	0.739603	0.999571	0.164208	0.555983	-0.782259	0.981639	0.999931	0.703666	-1.03472	1.52322	0.660724	0.13488	-2.01685	1.66043	1.05812	-2.67533	0.235584	-1.20188	0.321313	-0.611953	1.72365	0.957784	2.37963	-0.957332	-2.82254	3.129	1.18141	0.0985524	0.384885	-0.233313	2.40605	-2.39134	1.93819
Fam162a	ENSMUSG00000003955	2.1251	-0.116498	1.33255	2.9627e-10	1.13876e-06	0.79542	0.958728	0.0039659	0.146105	2.00855	0.879107	-0.965961	0.0284977	0.896127	0.596273	-0.839744	-2.79329	-2.37217	-0.897601	1.62278	2.74131	0.418252	-2.97569	-2.37746	-2.32463	-0.189106	1.81961	1.74469	2.10995	1.44571	0.788394	1.31094	0.968751	-0.0158913	0.787429	0.518978	-1.04444	-0.695081	0.971966	0.353647
Rpl8	ENSMUSG00000003970	0.145785	0.401098	0.414414	0.574571	0.900123	0.407956	0.872777	0.0871934	0.690505	0.0502932	-0.267913	-0.502447	0.989462	0.999931	0.397961	2.43891	2.77153	1.77347	2.68416	2.52615	2.76802	3.2061	2.68383	2.92642	3.12743	2.96391	2.83454	2.56866	1.94319	2.1655	2.73416	2.23721	2.55915	2.5117	2.50903	2.43041	2.02779	1.84986	2.30699	2.61939
Ssbp2	ENSMUSG00000003992	0.374214	0.247158	0.565068	0.449408	0.846317	0.776565	0.955562	0.260765	0.955477	-0.540617	-2.12923	-1.12547	0.926038	0.153259	0.3438	1.1509	1.33559	0.994732	-0.579493	-0.389549	1.64394	0.843973	-2.0371	1.93245	-0.516229	1.69322	1.5147	3.44508	0.987739	-0.358911	-0.22201	1.27264	2.9216	-0.110755	0.160095	-1.99347	1.88922	-0.999476	1.81717	1.39138
Fancl	ENSMUSG00000004018	0.133619	-0.335082	0.715424	0.839726	0.969372	0.587492	0.913383	0.20192	0.906653	0.289401	0.403331	1.45263	0.943372	0.999931	0.158572	-0.90921	-0.441619	-2.27942	0.421822	0.505147	0.317975	-1.291	-2.88933	-2.23929	-0.31102	1.55931	-3.0246	-1.95449	-3.4308	-1.76277	2.0693	0.678134	0.208176	0.266332	-0.0402568	-2.26853	-1.83331	0.0367679	1.38437	-0.689242
Brinp2	ENSMUSG00000004031	1.14875	1.61248	0.568662	0.00680591	0.127401	0.0256572	0.296446	0.358929	0.999571	1.11175	-0.496743	-0.424686	0.809369	0.999931	0.671322	-3.3492	-3.28132	-0.735354	-0.00228495	-1.94945	1.31895	1.89055	0.909774	0.0957972	1.87849	-0.758487	-0.35906	-2.32995	-0.236696	-1.80306	0.68024	-0.0148019	0.967002	-0.259446	-0.867769	-0.25971	-1.73459	0.0307943	-2.55635	0.0683687
Gstm5	ENSMUSG00000004032	0.987087	0.0130063	0.0838461	0.139049	0.616445	0.987432	0.996133	0.758972	0.999571	1.65917	-0.178965	-0.299246	0.211872	0.999931	0.777856	-3.11973	-0.517838	-1.79899	-0.0539377	1.19484	1.00208	-1.72296	-2.81306	0.751387	-1.65931	-3.15783	-0.512446	-1.52621	1.72878	2.62698	-1.58554	-1.75974	1.57887	1.29387	1.9871	-1.75282	-1.68747	0.894705	-1.59395	1.47569
Stat3	ENSMUSG00000004040	-0.304246	0.284381	0.176143	0.331068	0.790642	0.457109	0.88729	0.470375	0.999571	0.122499	-0.903599	-0.441546	0.961144	0.661665	0.562551	2.68935	2.34926	2.44101	2.91276	2.79187	2.26817	2.70722	3.32772	3.35267	2.33378	2.76423	3.11821	2.39504	2.50287	2.05315	3.18884	3.50707	2.92501	3.21076	3.42229	3.25225	3.01358	3.00258	3.30501	3.23559
Stat5a	ENSMUSG00000004043	-0.170213	-2.21664	-0.28239	0.784874	0.956988	0.0013228	0.0363172	0.604621	0.999571	-1.61642	1.12221	-0.574883	0.474544	0.924714	0.615914	-1.21184	1.46849	0.601172	0.344326	-2.47153	0.627362	-0.483525	-1.90256	-2.72632	-1.97559	1.35871	-0.88113	-1.41875	-1.59952	-0.618328	1.77803	0.415917	2.23042	-3.6525	0.544921	-0.297759	0.542032	0.125168	-1.81781	-0.692699
Cavin1	ENSMUSG00000004044	0.300919	0.167503	0.953578	0.682051	0.933578	0.882986	0.975183	0.195848	0.897384	0.318759	-0.564234	-1.44582	0.956375	0.999931	0.128918	-0.244105	1.21531	1.36054	0.502005	1.17264	0.255435	1.573	2.42438	2.24687	0.13647	1.77244	2.00482	1.83839	2.06179	1.85454	0.140597	1.57889	1.81113	2.08764	1.85551	1.43571	1.67623	1.89884	-0.642575	1.51974
Akt2	ENSMUSG00000004056	0.21413	-2.27509	-0.0722628	0.76128	0.95147	0.00133328	0.0365181	0.933457	0.999571	0.172577	1.37581	-1.74897	0.977221	0.770822	0.075533	0.0801926	1.85431	0.867403	-1.3481	1.37468	0.521813	0.718009	-2.52498	-0.986979	1.63778	0.167024	1.51442	2.25558	1.25944	-0.135605	1.58406	2.77749	1.42197	0.768274	0.859243	1.53686	0.546649	0.777835	-0.6249	0.695107
Dnaja3	ENSMUSG00000004069	0.549586	1.35677	0.0522116	0.349529	0.802053	0.089243	0.589045	0.95185	0.999571	0.28986	-1.89627	0.728119	0.964985	0.2865	0.731398	1.47843	1.1384	0.3464	-0.462517	-0.0735083	1.51927	1.04035	-2.24616	2.92937	1.7304	0.199944	1.74811	-1.2921	1.41226	2.70955	-0.655724	1.2739	2.67922	1.52851	0.375455	0.811088	2.00724	1.15631	2.06939	0.361838
Hmox2	ENSMUSG00000004070	0.780565	-1.72515	-0.417431	0.058412	0.421495	0.0234819	0.281675	0.328879	0.997295	0.598785	0.238943	2.31898	0.926038	0.999931	1.23082e-06	-0.845095	1.63153	0.788053	-0.288589	0.113437	1.86703	-1.85446	-2.38664	-1.67771	-2.47859	-0.102076	-3.24869	-0.995577	1.71853	-0.583545	1.21654	-1.71977	1.58502	-3.27771	1.47606	-1.68989	0.461108	1.22396	3.51845	1.32186
Cdip1	ENSMUSG00000004071	0.108254	0.0315246	1.17421	0.882173	0.975646	0.969225	0.991242	0.038784	0.499925	0.202035	-0.702959	0.570092	0.974377	0.946208	0.0410034	-0.475538	0.405711	1.79613	1.10595	1.11135	0.566972	2.10351	1.60825	1.02354	0.264661	2.0425	2.33458	1.41573	1.21607	-1.85913	2.58663	0.777665	1.7835	2.00419	0.832021	-2.21544	0.788981	-2.69534	2.85012	0.986315
Map3k20	ENSMUSG00000004085	-0.0464442	-0.386814	-0.455211	0.953114	0.991283	0.745479	0.948916	0.56558	0.999571	0.199767	0.399807	-0.448695	0.972444	0.999931	0.811784	1.11738	1.6447	0.601667	0.0746029	2.42053	1.08786	0.192777	1.92339	1.75972	-0.297068	-0.0412485	1.17892	1.35407	2.07211	1.02231	-0.342031	1.76513	1.74818	-0.580673	2.20034	2.85301	1.15257	1.68039	1.01922	1.16339
Cwc15	ENSMUSG00000004096	-0.905372	-1.0411	0.24264	0.231729	0.72001	0.31885	0.848918	0.581667	0.999571	0.0645368	0.915349	-0.555979	0.986046	0.999931	0.695609	1.00516	1.49212	2.86204	2.05245	0.323937	0.543737	1.1648	1.41305	0.69343	0.836677	2.23537	2.36455	1.57243	2.30398	1.98179	1.83296	1.25981	1.67771	2.41876	0.955666	1.21942	2.86005	1.94264	1.65488	1.14605
Dnmt1	ENSMUSG00000004099	-0.205462	-0.461293	0.369874	0.771006	0.952909	0.691183	0.933889	0.639954	0.999571	-0.38467	-1.1157	-1.41755	0.957281	0.916149	0.433507	1.39316	1.7694	-0.493728	0.834549	2.33285	0.511044	0.492971	2.7951	1.95823	-0.417111	2.45911	-0.583107	2.37412	1.05028	-0.169422	-0.415396	2.88798	1.95924	-0.551771	1.97567	-0.411907	0.989945	-0.93832	-0.336889	0.904119
Ppan	ENSMUSG00000004100	0.529646	1.72534	0.158708	0.4046	0.825012	0.00493651	0.0987862	0.633665	0.999571	1.10863	0.0252371	-0.332072	0.756735	0.999931	0.735804	-3.35024	-0.764729	-2.24169	-0.544992	0.68518	0.119162	-1.15139	-2.42757	0.924763	0.620341	-1.43138	-0.667996	-1.25784	0.189295	-0.743089	1.02813	-2.11268	-1.04316	0.403527	-0.644018	1.46445	-1.04679	-0.479389	-1.48196	0.8609
Angptl2	ENSMUSG00000004105	0.232247	0.138578	-0.133129	0.415228	0.831116	0.883801	0.975183	0.654201	0.999571	0.244945	0.470931	-0.187834	0.969546	0.999931	0.851147	-3.50624	-0.221086	-0.274765	-2.09674	0.810615	-2.7964	-0.779861	-2.28257	0.264563	-1.62637	-2.68804	-3.33478	-2.10101	0.647774	-1.87325	-1.62841	-2.59872	1.13692	-0.357019	0.547698	1.51611	-1.75019	0.297675	-2.31339	-3.22991
Cacna1e	ENSMUSG00000004110	-0.122044	0.358843	-0.320334	0.862869	0.97317	0.691987	0.933889	0.678919	0.999571	0.34237	0.135064	0.767	0.956152	0.999931	0.152542	1.9709	0.901453	-0.240261	0.316202	-2.04564	0.846706	2.06902	2.1926	0.246071	0.696934	0.227868	0.962176	0.0245887	1.22495	0.139072	0.413709	2.45316	0.804462	0.316178	-0.358435	0.575354	1.62328	1.29798	1.49177	0.0355259
Cacna1b	ENSMUSG00000004113	1.02527	1.68976	0.858647	0.106307	0.5497	0.0152708	0.212924	0.0908256	0.699139	1.02563	-0.846427	-0.515677	0.818771	0.999931	0.665145	-0.830677	-0.629593	-0.864977	0.338586	1.53933	1.07243	-0.169195	0.469736	1.19164	0.65446	1.48305	-0.471093	-0.652072	0.564462	-0.524787	0.678616	0.672622	1.99932	-0.591634	0.746726	0.927083	-0.483413	0.957286	-0.689185	0.386008
Trmt10a	ENSMUSG00000004127	0.491853	1.33161	-0.143697	0.496209	0.868895	0.0962173	0.615239	0.863273	0.999571	-0.794682	-1.84453	0.12478	0.892667	0.351549	0.956768	-1.12463	1.21478	0.132817	0.572354	2.37189	1.42935	-2.75473	-2.75469	1.19187	0.436358	-0.0978562	-3.09361	0.812112	-1.09463	-2.44888	-2.532	-2.98378	2.32919	-0.997672	-0.747874	-0.445098	-0.39763	-2.98507	0.367901	-0.861165
Etv1	ENSMUSG00000004151	0.828499	1.14244	0.822103	0.0470845	0.37723	0.280357	0.84107	0.234703	0.939341	1.43779	-0.740059	0.946478	0.605268	0.999931	0.315979	-0.86455	0.230394	0.321849	1.02942	0.126886	1.61477	1.01291	1.11165	0.509798	0.836166	1.71826	0.569133	0.495622	1.18502	1.15531	-1.04106	0.677861	0.518674	0.464415	0.743467	-1.44262	1.75182	-0.948243	1.99663	0.427294
Kifc2	ENSMUSG00000004187	-0.16059	1.73764	0.516124	0.829252	0.967717	0.0244877	0.287543	0.502606	0.999571	0.348406	-2.46749	-0.738048	0.957281	0.0131935	0.663159	-0.0163117	1.40941	-0.439749	-0.273696	1.15377	0.291261	0.0357695	0.276367	3.04198	0.944201	2.14452	-0.401053	1.65463	1.43399	0.398287	1.02971	0.230746	-1.8869	-3.02673	0.140554	-0.0222997	0.98361	1.48189	0.140779	0.569719
Psap	ENSMUSG00000004207	-0.212475	0.0382505	0.0853045	0.00817565	0.144149	0.758661	0.952028	0.123969	0.775833	-0.126759	-0.0543329	-0.480376	0.907915	0.999931	3.7542e-08	4.00303	3.90922	3.91356	3.92171	3.97601	3.69165	3.89647	4.07226	4.06483	3.83425	3.93365	3.77624	4.10641	3.50812	3.46766	4.03025	3.54896	3.90583	3.83228	4.16112	3.90847	3.8806	3.60272	3.66976	3.6222
Ikbkg	ENSMUSG00000004221	0.132447	-1.52023	-0.790609	0.840073	0.969372	0.0639916	0.492299	0.188573	0.883198	-0.771149	0.636332	-0.104671	0.909596	0.999931	0.963156	1.11383	1.58182	-1.9778	-1.64761	-2.45936	0.785615	-1.329	-3.10074	-1.99903	-2.52415	-3.17377	-0.536825	1.5892	-0.979754	-1.99621	1.67254	-1.99186	-2.32431	-0.755893	-2.12462	0.432542	0.197984	-0.556276	1.03692	0.1834
Phb2	ENSMUSG00000004264	0.952712	0.953855	0.635837	0.0839997	0.498847	0.356419	0.85877	0.404085	0.999571	1.0605	-0.369725	1.01604	0.853171	0.999931	0.530649	-0.61043	1.56121	0.622558	1.1362	0.200623	2.12129	2.2464	1.68706	1.60239	1.93196	1.95349	1.3472	-0.982401	1.5561	1.487	1.70679	1.18549	1.11074	0.48215	1.10217	1.36907	2.04352	1.15707	1.49736	0.611574
Ptpn6	ENSMUSG00000004266	-0.466264	-2.57159	-0.383244	0.479457	0.862726	9.95499e-06	0.000704239	0.344236	0.999571	-0.745027	0.53058	2.2699	0.873911	0.999931	0.0181108	1.2785	1.78864	1.31254	0.864091	2.28835	0.705844	0.351912	-1.79744	-1.38	2.20139	1.55198	1.09954	-0.0603867	0.733466	0.734538	2.46174	1.7092	-0.400626	1.68619	1.02638	-1.4009	1.5782	-3.36325	4.82893	2.12813
Eno2	ENSMUSG00000004267	0.501693	-0.385036	1.09739	0.368961	0.810196	0.767505	0.953563	0.113346	0.744339	1.23159	0.866566	0.630977	0.72729	0.975031	0.448929	0.933551	0.972608	-0.571697	1.00528	-0.854404	1.59238	1.76897	0.916777	0.192357	0.463283	1.16875	2.27067	0.692689	1.49161	0.988739	2.24051	0.0271284	1.67856	1.14416	1.66758	1.34527	0.90426	3.24937	2.69193	2.31339
Emg1	ENSMUSG00000004268	0.646384	-0.92997	0.126833	0.138522	0.615053	0.438691	0.880593	0.87982	0.999571	0.615496	-0.355688	1.05321	0.926038	0.999931	0.0452444	-2.67575	2.3341	0.940159	1.00234	-0.66841	2.36251	0.671077	1.64125	0.905809	-0.139579	-1.11402	2.53538	0.76192	2.24595	0.875758	-0.143758	1.3593	0.533955	2.29651	0.841232	-2.20862	2.08895	2.19172	3.81306	2.43403
Lpcat3	ENSMUSG00000004270	-0.685892	-1.86943	0.840903	0.194277	0.689084	0.0159188	0.219343	0.234699	0.939341	-1.20512	1.20161	-2.35972	0.713273	0.830541	0.00296549	1.09484	2.31413	-1.77314	-0.366583	1.20074	-0.738501	1.45798	-2.26923	-1.57991	1.81592	1.89473	1.86602	2.66674	-0.364709	-0.480175	-1.36269	1.76332	2.4868	-0.0448907	0.977128	1.30365	-0.2101	-3.41061	-1.13008	-0.131612
Atp6v1f	ENSMUSG00000004285	0.301759	-0.569873	0.686451	0.431429	0.837946	0.575879	0.913383	0.0792314	0.673598	0.883866	1.11943	0.550455	0.750242	0.747985	0.364575	1.20356	1.83729	1.65689	2.49658	2.16824	2.52227	2.37412	2.97418	1.74241	1.59273	2.63882	2.65842	1.99774	2.56433	1.83843	2.84217	2.07089	1.86441	2.05747	2.37438	2.70853	2.43387	2.19355	3.33611	2.35725
Clcn5	ENSMUSG00000004317	-0.392204	2.15638	0.868437	0.405042	0.825735	0.000202063	0.00800682	0.183531	0.875586	-0.533766	-2.2996	0.947464	0.941671	0.113243	0.584905	-0.643582	-0.133718	-0.0559788	-0.941693	0.724398	-1.02615	-1.11765	-2.49097	2.36045	-1.19637	1.70699	0.742842	-2.10527	-0.964582	1.53202	-1.06543	0.121715	1.78532	0.673474	-0.00567956	0.343788	0.484981	-0.244803	0.789645	0.118863
Clcn3	ENSMUSG00000004319	0.636678	0.0162606	-0.158339	0.141516	0.621161	0.978365	0.993751	0.753089	0.999571	-0.0205126	-0.300406	1.03681	0.995319	0.999931	0.304906	0.167143	2.17145	1.53921	0.993093	2.4099	2.28004	2.63776	2.44645	1.91836	1.36328	1.67721	0.0600185	1.47571	2.0008	-0.911436	2.9818	1.38081	1.67619	1.47668	1.52079	1.56022	1.08438	0.353183	2.93318	1.95693
Pde1c	ENSMUSG00000004347	0.54238	-0.244992	-0.531981	0.466996	0.853187	0.842246	0.967109	0.307682	0.98987	-0.509263	0.296116	-1.3126	0.943372	0.999931	0.442938	-0.668549	-0.123269	0.538078	-1.18483	-1.02648	0.246321	1.12498	3.10346	-0.315256	-2.58169	-0.49701	-3.0456	0.695652	-0.562989	-2.84494	0.435522	0.478693	0.247783	-2.81191	0.255835	-0.142586	-1.01921	-0.352347	-2.81621	-0.409153
Utp20	ENSMUSG00000004356	1.03299	-0.000563969	1.20194	0.0459308	0.37193	0.999616	0.999852	0.046684	0.543408	1.40973	0.487307	0.308121	0.6438	0.999931	0.889479	0.93312	-0.626115	-0.0319438	-0.193308	0.0882818	1.40633	2.56956	0.834401	0.189739	-1.40753	1.40116	1.47074	-1.93203	1.31205	1.87741	2.03591	0.432875	2.03864	1.44978	1.8634	0.331922	1.09921	-3.00203	1.06942	0.626777
Cul3	ENSMUSG00000004364	0.516198	-0.341612	-0.852105	0.306859	0.774943	0.731733	0.945713	0.23743	0.943093	0.116987	0.10277	1.42047	0.982164	0.999931	0.196372	1.91392	2.20131	0.875233	0.297983	2.57332	2.93306	-0.0729745	-2.97867	0.822729	2.48163	-0.086407	-0.057092	1.49219	2.13049	1.44907	1.06872	1.33639	1.31205	1.08107	1.37189	0.906414	2.04869	2.98061	4.73194	0.0602241
Il11	ENSMUSG00000004371	-0.487709	0.432472	0.521238	0.135224	0.609565	0.675583	0.931175	0.39786	0.999571	-0.61541	-0.0672629	-2.04857	0.883008	0.999931	0.0184633	-0.839444	-0.517263	-1.23635	-2.11514	-3.20411	-3.28251	-1.9876	-2.48682	-0.619277	-2.70705	-0.872011	1.28553	0.323029	-3.24226	-2.78037	-2.56282	-3.65105	0.41132	-3.14941	-0.827075	-0.363081	-0.664862	-3.22368	-3.26766	-1.48041
Large1	ENSMUSG00000004383	0.764328	-2.06053	-0.431742	0.0982704	0.535714	0.00257347	0.0616938	0.339743	0.999571	0.529652	2.50685	1.00087	0.939404	0.043353	0.425434	-2.81011	0.713022	1.22382	-0.0678381	-1.84349	1.4543	0.898071	0.147066	-3.31121	-2.35624	-3.34788	-0.308621	-3.36462	1.08476	0.328803	2.20112	-0.162433	0.746866	1.04444	-0.236007	1.35675	-0.795753	2.01887	0.327347	0.178711
Tmed4	ENSMUSG00000004394	0.954426	0.458502	0.306673	0.0988219	0.53599	0.716784	0.941631	0.723439	0.999571	0.932219	0.631471	0.157912	0.900795	0.999931	0.943657	1.91896	-2.9392	0.220862	-0.531985	2.1392	2.41316	-0.515283	-2.92843	-0.191927	0.128942	1.51564	-0.495677	1.02739	0.589492	1.73725	1.86599	0.781404	0.132389	2.07764	0.272051	0.419946	1.71039	-0.775314	1.11093	-0.990875
Bid	ENSMUSG00000004446	1.32731	-1.83471	-0.109297	0.00386886	0.0935257	0.0132066	0.192728	0.859669	0.999571	-1.37838	1.20355	1.30696	0.600495	0.880175	0.338856	-1.33395	1.94698	0.559519	-0.761391	0.670879	2.04532	1.01882	1.16396	-1.8803	1.21054	1.09966	-0.500122	-1.26101	-2.95102	-0.919108	1.19771	1.46447	-1.96479	-2.8875	0.855359	0.840775	-0.0854153	-0.62916	1.73033	0.760045
Ralb	ENSMUSG00000004451	-1.18278	-0.24757	0.390655	0.117916	0.577281	0.817152	0.961539	0.577786	0.999571	-0.711632	-0.563571	-0.980033	0.925943	0.999931	0.604563	1.51548	0.200933	1.15546	1.08703	0.710645	-0.266547	-0.960088	-2.46869	0.485019	2.45211	-0.489248	2.17144	1.83372	0.20755	-0.720172	-0.66742	0.962991	2.4516	1.48845	-0.0918423	-2.05451	-0.0615577	0.0558177	1.34118	0.547802
Ppp1cc	ENSMUSG00000004455	-0.239549	-0.603566	0.679644	0.726553	0.946867	0.581569	0.913383	0.215885	0.925006	0.367043	0.0771463	-0.556231	0.94815	0.999931	0.657673	1.99166	1.99223	0.823837	0.599686	0.479529	0.677169	1.37752	-2.21776	0.81669	3.88067	1.16635	2.08008	3.27162	1.21545	-0.703858	1.60661	1.69112	2.60124	1.32178	0.771044	1.20648	1.16342	2.54842	2.07191	1.62237
Dnajb11	ENSMUSG00000004460	-0.315648	0.373878	-0.150622	0.368667	0.810166	0.266012	0.839067	0.655723	0.999571	-0.29456	-1.3939	0.134906	0.93977	0.331435	0.934314	2.43904	2.00849	2.7995	2.03482	0.906802	2.26142	1.27823	1.94412	3.18712	1.69557	2.40895	0.38489	1.89373	2.04906	2.08291	1.74221	1.49532	2.0609	1.99208	0.97272	1.33243	3.1261	2.79362	1.77873	2.05162
Zfp324	ENSMUSG00000004500	0.845323	1.52744	0.565704	0.116691	0.574789	0.0524323	0.448372	0.288423	0.976917	-0.212946	-0.386447	-0.845224	0.95659	0.999931	0.568838	-0.260986	-3.31395	-1.53849	-1.50336	-1.44663	0.770084	-2.35527	-3.03943	-0.550183	-0.801694	-3.66306	2.4479	-3.93109	-3.63585	0.10488	-0.496404	-0.740945	0.515368	-1.17345	-1.14193	-0.0901469	-2.03877	-2.4576	-3.95292	-0.812574
Gab2	ENSMUSG00000004508	-0.428342	-1.05326	-0.676238	0.519726	0.87939	0.232001	0.81847	0.210196	0.917312	-1.13962	0.300669	-0.170651	0.758142	0.999931	0.940059	2.38661	2.15238	2.33379	1.26659	1.82428	1.43432	0.859064	1.38514	1.44614	1.38918	1.30463	0.864924	1.66611	0.489873	1.65484	1.66557	-0.125193	0.128559	1.70556	1.3647	1.40989	1.81779	1.07065	1.69193	1.06962
Coro1c	ENSMUSG00000004530	-0.383484	-0.108477	-0.368996	0.328266	0.789578	0.874898	0.972966	0.410446	0.999571	-0.3301	1.24468	-0.203251	0.937067	0.75381	0.875934	1.94177	2.32023	2.19666	2.14535	1.68084	1.8851	1.94129	1.82574	1.41565	2.34824	1.77643	0.982564	1.75722	2.00571	1.50617	1.71909	2.47793	2.36418	1.8985	1.45364	2.36345	2.02987	2.21249	1.7313	1.4667
Tax1bp1	ENSMUSG00000004535	-0.122996	-0.0661848	0.0665782	0.649971	0.928241	0.920308	0.979745	0.879349	0.999571	-0.0134666	0.584487	-0.615003	0.995607	0.946835	0.557894	2.53298	1.60792	1.86934	1.69888	0.763504	2.28032	2.36353	1.5973	0.752935	2.99988	1.70808	0.301664	2.58313	2.19742	1.96587	1.52927	1.25157	2.08703	1.99786	2.69621	2.60671	2.98784	2.73948	1.0445	1.28208
Ndrg2	ENSMUSG00000004558	0.769389	0.708378	0.196119	0.18971	0.684464	0.411197	0.874012	0.8028	0.999571	1.11063	0.215777	0.623883	0.741264	0.999931	0.710328	0.344108	1.14439	0.284389	0.745059	2.65395	1.89109	1.11086	0.133758	1.48798	2.39603	1.66651	-0.329404	0.966963	2.3227	1.69903	2.0055	0.915896	1.11709	1.81803	2.55277	2.04404	1.64789	2.83852	1.62806	1.24556
Mettl17	ENSMUSG00000004561	-0.769526	-0.0986992	-0.313895	0.170452	0.656472	0.925378	0.981379	0.709555	0.999571	0.0328558	-0.132433	-0.558236	0.995339	0.999931	0.643525	-0.520468	0.137911	2.31689	0.963286	1.97081	-0.787292	0.5815	0.903097	1.14243	1.48933	-3.04573	1.5287	-1.14455	0.937154	-0.908053	1.66615	1.13163	1.58337	0.355935	0.721996	1.03718	-2.52751	1.79728	-1.30243	-0.0858893
Arhgef40	ENSMUSG00000004562	0.0834203	0.202791	-0.862414	0.853605	0.97146	0.652541	0.926361	0.13008	0.784255	-0.572131	-0.440892	2.11174	0.883427	0.999931	0.00435698	-0.234605	1.84446	1.40366	1.175	1.05472	1.83509	1.46006	0.653942	1.8565	0.993163	1.00675	1.05834	0.260897	1.54687	0.640806	2.40693	1.96802	2.2226	1.55856	1.25501	1.8155	1.6279	2.27956	2.319	1.66987
Pnpla6	ENSMUSG00000004565	0.331702	0.405088	0.457577	0.657708	0.928733	0.721916	0.943436	0.55918	0.999571	0.976997	-0.188498	-0.435149	0.875124	0.999931	0.73967	-0.391489	-3.04128	1.46215	0.764146	0.33911	1.30277	0.417152	-2.15233	0.842215	-1.5999	1.25316	-3.35177	-0.886518	0.197917	-0.363846	2.01187	-1.82308	2.09225	0.944198	-2.22215	-1.77086	-2.49301	-1.22037	-1.17907	0.188079
Mcoln1	ENSMUSG00000004567	-0.250529	0.35702	-0.473733	0.728088	0.947276	0.644527	0.924424	0.554093	0.999571	0.586466	-0.52127	0.267405	0.941932	0.999931	0.86029	-0.290489	0.721907	1.45759	1.01289	1.73034	0.818227	0.530041	0.9882	0.364128	0.822905	-0.364393	-0.569492	0.539977	1.26535	-0.191176	0.729968	-0.428582	-0.0799542	-0.886001	0.883319	0.117591	-0.535661	-0.36188	1.12923	1.00011
Arhgef18	ENSMUSG00000004568	-0.486992	-0.281047	0.423844	0.524522	0.8818	0.815313	0.961539	0.571732	0.999571	0.0619542	-0.00768285	0.512049	0.991903	0.999931	0.81265	1.3323	-3.13855	1.58243	-2.63321	0.148331	-0.670075	-0.311248	-2.04363	0.371883	0.64681	0.461298	1.94209	-0.852628	0.49899	-0.200069	1.10873	1.17978	1.10135	0.465776	1.61664	-1.95148	1.2108	-0.409651	1.74952	0.918324
Pkn2	ENSMUSG00000004591	-0.00900694	1.23847	-0.45474	0.990549	0.997121	0.195701	0.786559	0.55849	0.999571	0.463447	-0.833937	-0.698188	0.951016	0.999931	0.61726	1.52037	0.24442	-0.303173	-0.675914	0.56883	0.0965103	-0.0758676	-2.19959	2.48383	-1.47936	-3.72048	0.981145	-1.3363	0.808935	-0.744562	1.98301	-2.35564	2.03604	0.159165	-0.232033	1.62611	-1.47849	-3.08908	-1.62866	0.309948
Cd33	ENSMUSG00000004609	-0.414358	0.0239067	-0.101241	0.106359	0.549721	0.913059	0.978526	0.564436	0.999571	-0.631827	-0.262765	-0.227027	0.829983	0.999931	0.724069	2.66411	2.66088	3.04653	2.89632	2.53566	2.08711	2.70534	3.66506	2.99916	3.30542	2.72162	2.93909	2.46855	2.32639	2.28324	2.38648	2.24422	2.50673	2.33246	3.13643	2.12024	2.53404	2.32527	2.48999	3.10258
Etfb	ENSMUSG00000004610	-0.121624	-0.651152	0.533909	0.872643	0.974288	0.606052	0.917111	0.488212	0.999571	1.16004	2.21931	0.29224	0.747896	0.353589	0.872942	-0.170302	1.74081	0.881875	0.830928	-0.0706019	-0.0210939	1.17925	1.229	1.14141	0.305293	1.62094	2.15896	-1.08829	1.63735	1.83315	2.46805	1.32173	1.31362	1.91826	1.18191	2.79775	2.22132	2.29034	1.17751	1.61228
Nkg7	ENSMUSG00000004612	1.0403	0.364468	1.11865	0.155341	0.637831	0.768561	0.954062	0.147602	0.809565	0.22102	-0.0733147	0.961576	0.976558	0.999931	0.278035	-0.551761	-0.193113	-0.629334	-1.45847	-0.102531	0.755438	0.974428	-2.83277	-0.669808	-0.0201041	1.96724	-0.166304	0.263249	0.243847	0.178213	0.0496223	0.272257	0.130603	-0.444046	-0.211357	-0.364135	0.985561	-0.828446	2.28837	-1.1378
Stxbp2	ENSMUSG00000004626	0.474164	-0.242081	0.89951	0.448777	0.846317	0.830398	0.965989	0.211443	0.920405	0.877627	-0.0503579	-0.569278	0.910834	0.999931	0.776805	1.30391	0.596708	-2.18069	0.775287	-1.69684	1.32689	2.67387	2.13348	0.879722	1.269	1.30124	1.37948	1.21578	-0.0180706	-1.48839	2.85445	1.16659	-1.29783	1.22501	0.205707	-2.177	1.85626	-2.59071	2.05347	0.488747
Sgce	ENSMUSG00000004631	-0.416585	0.118591	-0.336522	0.493894	0.867602	0.73456	0.946287	0.336011	0.999571	-0.74319	-1.63483	-0.567418	0.760809	0.306332	0.592614	2.03632	2.49935	2.4329	1.42395	2.47739	1.514	1.2989	0.983457	2.61669	1.53659	1.72101	2.70434	2.36952	1.46704	0.516836	3.24789	1.89884	2.0458	0.8132	1.54812	1.57823	1.19096	2.07337	2.05689	2.14288
Chn2	ENSMUSG00000004633	0.831144	-0.79582	0.134199	0.186761	0.679484	0.516278	0.896911	0.850618	0.999571	0.0667632	0.175695	0.0249478	0.991712	0.999931	0.991749	-1.04426	1.75812	-0.261172	-0.917904	0.846935	0.894357	1.90271	-2.56106	0.0673517	-1.39806	1.55754	-0.693425	1.07698	1.00033	1.34071	1.72797	0.616523	2.05143	1.94612	2.24056	-0.228078	0.523369	1.18123	0.945341	0.54887
Wwox	ENSMUSG00000004637	1.1852	-0.563586	-0.077092	0.0078699	0.140579	0.314347	0.848183	0.853317	0.999571	-0.0845452	1.78668	1.29309	0.984764	0.363587	0.321057	-3.51743	-0.952022	-0.992611	-0.22053	-2.57021	1.36527	-0.477447	0.942436	-3.01242	-1.75312	-1.31899	-3.31974	-2.03873	-1.11315	-1.44184	-1.42155	-3.06783	-1.08213	1.09257	-0.57182	0.240921	0.939994	-3.09647	1.13538	1.21709
Slbp	ENSMUSG00000004642	0.176295	0.0526085	0.300372	0.742543	0.950167	0.944667	0.984712	0.557232	0.999571	-0.549094	1.02699	0.581008	0.926038	0.736687	0.760766	1.60965	2.11215	1.73157	1.75535	2.13614	1.79308	1.76812	3.60949	1.96837	2.84999	2.38598	2.25358	0.721303	1.40408	0.891613	0.757673	2.16468	2.3698	0.945604	1.89111	2.58042	1.89922	1.1327	2.09579	1.88851
Arid3b	ENSMUSG00000004661	-0.672798	-0.920917	0.269392	0.350239	0.802304	0.322939	0.849251	0.646575	0.999571	-0.320054	-0.238115	1.68966	0.965861	0.999931	0.19147	0.991009	-0.969023	2.2159	1.8605	0.775124	0.397187	0.29048	2.86633	-1.26035	1.04085	1.03441	2.70873	-0.970123	1.1424	1.96431	-1.03313	1.14015	2.12278	1.73146	1.86152	0.873302	1.44347	-1.06989	1.8391	1.82748
Cnn2	ENSMUSG00000004665	-0.0996457	-1.25612	-0.0470625	0.874982	0.974489	0.121659	0.679698	0.953507	0.999571	-0.24444	2.13392	1.54227	0.975569	0.192945	0.0821203	0.884646	1.21152	-0.250559	0.96516	-2.3295	0.60452	1.61307	-2.24218	-2.15802	1.49613	1.24148	-3.29233	-1.1961	0.0679388	-0.600558	-1.1411	-2.20969	2.60661	0.353074	-2.89106	2.4014	-1.18391	0.10651	1.78006	0.414148
Polr2e	ENSMUSG00000004667	-0.900547	-1.023	0.231209	0.231537	0.72001	0.389049	0.865974	0.715438	0.999571	-0.364196	0.0235896	-0.521475	0.956375	0.999931	0.664359	1.25937	1.9076	0.420441	0.37176	0.406858	-0.0549354	0.288176	-2.1655	1.06696	-1.00186	1.734	-0.283059	-0.766549	0.634172	2.96864	1.8416	2.2612	3.03101	1.4042	1.98055	0.656084	1.63649	1.18794	-1.05112	0.79238
Myo9b	ENSMUSG00000004677	-1.17869	-0.256909	-1.72755	0.108066	0.554882	0.831222	0.965989	0.000769678	0.0477159	-0.848254	-0.830522	1.21864	0.91481	0.999931	0.217296	0.90221	-0.0258812	0.241933	0.433151	-2.2561	-0.509684	-0.438313	-2.35347	-0.959516	0.805501	-3.75346	-3.24524	-2.45281	-0.186771	-1.92065	-2.11885	-3.35066	1.50134	0.0628397	-1.56873	-3.34205	-1.97204	-2.93988	1.07198	-0.590306
Hdac9	ENSMUSG00000004698	0.021012	0.879466	0.337749	0.97905	0.99501	0.318612	0.848825	0.668518	0.999571	0.444042	-0.488876	-0.833284	0.953849	0.999931	0.131346	1.01615	0.131565	0.756775	0.774242	1.19731	0.542299	1.04991	0.740082	0.923381	0.977381	0.92722	0.709702	1.56738	1.12511	0.6626	0.821409	1.00151	0.666128	0.423249	1.11895	0.791215	0.47954	1.19397	0.775102	0.466948
Ly9	ENSMUSG00000004707	-0.305001	-1.09099	0.0953651	0.538757	0.88622	0.265859	0.839067	0.829505	0.999571	-0.642543	0.383109	-0.480623	0.906866	0.999931	0.720691	1.90621	1.8209	1.6234	1.50146	0.835026	1.52454	1.64906	1.37328	1.31156	2.16074	1.56937	1.97212	1.93252	1.14667	0.979774	1.38685	0.480179	1.75375	1.86535	1.43543	1.45029	1.75253	1.34584	1.819	1.77681
Cd244a	ENSMUSG00000004709	-1.24874	0.593862	-0.606365	0.0890139	0.510891	0.562107	0.910729	0.401016	0.999571	-0.0861632	-0.335355	1.30225	0.990148	0.999931	0.338856	1.11593	1.84797	0.770157	2.22714	0.180361	0.15055	0.661714	1.32996	1.17956	3.2348	1.09871	-3.16454	-0.895956	0.617347	-0.548492	0.792511	-1.48436	1.05627	0.512145	0.80146	0.680245	0.55036	1.6733	1.57933	0.737676
Adgre1	ENSMUSG00000004730	0.221154	-0.884129	0.0406325	0.524591	0.8818	0.259548	0.833395	0.908563	0.999571	-0.226967	0.163552	0.240003	0.951016	0.999931	0.773824	2.69838	2.17307	2.70884	1.86514	2.83815	2.50878	2.77254	3.06689	2.19468	2.10776	2.30803	2.22015	2.43492	2.2162	2.31177	2.13262	2.43728	2.37734	2.79808	2.80381	2.12702	1.83734	2.57274	3.13387	2.94771
Mtfp1	ENSMUSG00000004748	0.899085	0.381544	0.21843	0.161476	0.64384	0.644754	0.924479	0.387687	0.999571	0.656214	0.0302682	1.20405	0.760809	0.999931	0.366676	-2.74423	-2.84585	-2.35268	-2.39903	-0.805664	1.30506	-1.05435	-3.41153	-0.0891974	-3.32186	-2.49928	-0.303444	-3.02396	-0.196272	1.35892	-0.95857	-2.44329	0.81319	0.541404	0.253414	-0.139986	-1.67251	1.47498	-0.0430784	-0.416791
Rab23	ENSMUSG00000004768	-0.230769	-0.268581	-0.886749	0.718473	0.944732	0.819438	0.961919	0.214575	0.924614	-0.31427	-1.03592	1.55363	0.956375	0.984405	0.0749732	0.996948	0.548012	-0.122791	0.464307	-1.55904	1.44358	-0.295164	-2.72372	-0.279064	-2.29997	-0.506524	-0.424608	-2.36492	-0.577771	2.50072	0.76294	-0.0626974	1.05098	-2.74186	0.377364	-2.42738	-0.778697	1.4183	0.778378	-0.827247
Rab11a	ENSMUSG00000004771	-0.0819934	-0.704764	-0.311608	0.835236	0.969211	0.345057	0.855408	0.373542	0.999571	-0.171362	0.321778	1.06891	0.950205	0.999931	0.330336	2.64218	2.35784	2.63563	1.33127	1.8985	2.12115	2.36248	2.27637	1.50345	1.14694	2.65462	0.392603	1.71946	2.53494	1.64247	2.44986	1.73768	1.79649	1.90602	1.61759	1.68834	2.27807	1.65664	3.49639	2.31387
Eif2b2	ENSMUSG00000004788	0.241103	-0.00114099	-0.27695	0.712296	0.943877	0.999266	0.999852	0.715573	0.999571	0.952527	0.48596	-1.49835	0.858896	0.999931	0.375584	-0.580757	0.513358	-0.0387148	2.01351	1.16227	1.17806	0.563302	2.56413	0.234497	1.81705	-1.35462	-0.68601	1.83615	1.48737	-0.965534	-0.368266	0.451267	0.0314083	0.664372	0.0845546	0.353455	-0.20013	-2.93355	-1.71725	1.93451
Dlst	ENSMUSG00000004789	-0.529523	-1.15333	-0.412753	0.497109	0.86912	0.321787	0.849251	0.588935	0.999571	0.45954	1.61867	-0.211502	0.93977	0.689341	0.91827	1.07761	2.05893	1.01655	1.18457	2.36126	0.583975	1.08562	1.68852	1.03115	1.28963	0.874906	0.562664	1.41999	1.90552	1.46696	2.07141	3.20754	-0.0915489	1.84707	1.20347	1.99398	1.41662	1.85342	1.22151	1.42174
Ulk2	ENSMUSG00000004798	0.1141	-0.984811	-0.759324	0.792536	0.957791	0.249616	0.828883	0.168692	0.845001	-0.131335	-0.0284022	0.347404	0.971793	0.999931	0.86533	2.66575	2.07038	1.61767	0.359789	0.916864	1.85917	2.46037	0.815096	1.12619	1.81459	1.20185	-0.488488	1.43089	1.76121	2.29273	1.78027	0.990442	1.89467	2.12471	3.01771	0.692803	1.61856	2.72715	1.29162	2.22959
Grap	ENSMUSG00000004837	-0.518438	0.00765803	0.0530551	0.395704	0.821249	0.993278	0.997603	0.910026	0.999571	0.358605	-0.171182	-0.0986814	0.946947	0.999931	0.913954	1.80774	1.82006	0.361631	1.96011	0.962527	1.37911	1.23272	1.05069	0.798641	1.12989	1.76716	1.66274	1.17717	2.08215	1.49222	1.21399	2.49669	1.64158	-0.387606	0.593126	1.09214	1.15659	0.573611	1.40834	1.23057
Pou1f1	ENSMUSG00000004842	-1.03636	-1.45382	-1.3524	0.105179	0.547546	0.201792	0.795365	0.013293	0.277183	-1.0979	0.281133	-1.69647	0.749637	0.999931	0.210504	-0.632134	1.94104	2.05641	1.43714	1.15535	-0.106215	-0.494568	2.92843	0.347755	-0.888632	-2.93202	-0.00594883	1.12102	1.35027	-2.52949	-0.895666	0.957063	2.31277	-2.93843	0.408013	0.60465	-1.33365	-0.204581	-2.58688	-1.15109
Chmp2b	ENSMUSG00000004843	0.396142	0.580258	0.435427	0.498469	0.870387	0.590042	0.91407	0.476827	0.999571	1.57487	0.71154	0.2708	0.316463	0.999931	0.912335	0.466833	-3.08475	0.235816	0.750545	1.08996	1.25572	-0.557102	-1.96148	0.214009	-0.830334	-1.23183	1.70002	-1.47294	1.18704	-0.809232	2.49207	0.685746	3.16396	-1.04478	-0.278326	2.49024	-1.72372	1.29323	1.47832	-0.0626263
Plod3	ENSMUSG00000004846	0.0713065	-0.300999	-1.61276	0.911998	0.984529	0.670877	0.931023	9.13946e-05	0.0114551	-0.2786	-0.831783	0.690634	0.948492	0.999931	0.626901	1.71137	1.77693	2.50449	1.12772	2.89333	1.37809	1.71039	1.58203	1.87597	2.56188	-0.179346	-0.555722	-0.979885	2.20562	1.83052	1.72818	1.60039	-0.697487	2.19686	-0.57512	1.14549	0.706505	0.0262601	1.625	-0.578877
Ap1s1	ENSMUSG00000004849	-0.174827	0.0979856	0.73566	0.783702	0.956341	0.934514	0.983328	0.171848	0.850599	0.175894	-0.931998	-0.567316	0.982164	0.952116	0.7616	1.75158	1.25268	0.580773	2.34778	-2.19021	1.54115	1.58598	2.90302	1.74929	0.979306	1.42162	2.03459	1.50997	0.675213	1.81276	1.54804	-1.70087	-1.52254	1.27279	0.625763	-1.74151	2.96854	0.353744	1.65611	0.930854
Srpk1	ENSMUSG00000004865	-0.238563	0.472053	0.0983245	0.727003	0.947132	0.387747	0.865974	0.865246	0.999571	0.164777	-0.528092	0.0678624	0.972444	0.999931	0.961149	0.68012	1.15947	1.53068	0.594914	1.17499	1.29433	1.17323	0.796804	1.96034	1.05126	1.87044	0.654296	0.797029	1.59069	1.30456	1.2456	1.53553	1.31177	0.38766	0.705907	1.43229	1.38374	1.36319	1.14561	1.8499
Bcan	ENSMUSG00000004892	1.25055	0.919876	0.980863	0.0276542	0.289749	0.352833	0.857856	0.218864	0.929449	1.43756	0.96309	0.953384	0.446468	0.891674	0.440433	-0.225724	-0.704384	0.517245	0.128465	2.90131	1.68185	0.478029	2.53451	0.893206	1.98044	1.23766	0.163526	1.28113	1.92943	-1.30609	1.01623	2.65717	0.579325	-0.606409	1.58814	2.31224	1.15872	1.20473	2.35173	1.33237
Rrnad1	ENSMUSG00000004896	-0.794725	-1.69118	-0.721368	0.230307	0.718933	0.0222588	0.271317	0.360437	0.999571	-0.832531	1.17518	0.76436	0.892312	0.89995	0.734018	1.52256	1.07697	0.435184	0.150007	-0.385985	-0.215148	1.60005	2.25698	-1.76355	0.43973	-2.99266	1.45208	-1.72507	-0.254463	-1.70408	1.87301	1.76263	0.506913	-0.657462	0.692877	0.666869	-2.18052	-0.242124	1.18226	1.45239
Hdgf	ENSMUSG00000004897	-0.4005	0.0779857	-0.0214942	0.434612	0.838327	0.896447	0.976773	0.963132	0.999571	0.0481493	-0.989409	-0.41113	0.988647	0.828134	0.779057	1.98107	2.62595	2.2376	2.47516	2.0437	1.61548	1.9432	2.83269	2.77799	1.77571	1.37193	2.19219	1.84423	2.83706	1.85921	1.69148	2.52742	2.21116	2.0982	1.28247	1.37536	1.55773	1.68828	1.98429	2.68097
Apba3	ENSMUSG00000004931	0.516909	0.291075	-0.678565	0.319084	0.781466	0.680337	0.931978	0.088637	0.693655	-1.33978	-2.66356	1.24676	0.749821	0.00426359	0.322227	-3.30412	1.42033	1.0961	-1.42277	0.0432634	1.11337	-1.0563	0.86585	1.7208	-2.29768	-0.863418	-3.19196	-2.17157	-0.218107	-1.88622	0.546553	-2.68283	-2.10268	-3.14683	-0.32256	-2.65435	0.425834	-3.18962	0.592321	0.709739
Matk	ENSMUSG00000004933	1.1727	1.52167	-0.565429	0.0181001	0.22835	0.049087	0.43307	0.383545	0.999571	1.49587	-1.16961	-0.142684	0.486126	0.712639	0.938767	-0.718471	1.58077	-0.230281	-0.165482	1.01271	1.99219	2.28044	0.139453	2.54999	0.480959	-0.358771	-0.125259	0.635631	2.37376	0.12903	2.38209	0.103262	0.152864	1.41585	0.0368501	1.17739	0.991905	-0.527933	0.368297	0.0724987
Pias4	ENSMUSG00000004934	-0.183929	-0.0978155	0.335884	0.678287	0.93269	0.89498	0.976626	0.581514	0.999571	-0.00295353	0.916937	-1.20384	0.999631	0.997499	0.16914	1.40594	0.63755	1.80195	1.7024	0.906123	1.56982	1.37402	0.675688	0.651021	1.79525	0.83905	-0.301412	2.26689	0.819744	0.637256	1.41766	0.235613	0.998673	1.06078	0.632212	1.55171	0.485319	2.42278	0.439213	0.461847
Map2k1	ENSMUSG00000004936	0.275984	0.636749	0.698582	0.494179	0.867669	0.415529	0.876323	0.0658951	0.629391	0.721245	-0.0321668	-0.247765	0.85745	0.999931	0.734298	1.41272	1.2821	1.53427	2.30902	1.76227	2.20041	2.80035	2.94357	1.6686	3.15646	2.61654	2.58161	2.05664	2.40866	2.56474	2.15566	2.07423	1.87805	2.16597	3.38051	1.57832	2.10959	2.80572	1.70223	2.68145
Sgta	ENSMUSG00000004937	0.633639	-0.532531	-0.339788	0.32836	0.789618	0.656388	0.927209	0.624411	0.999571	0.201037	-0.344802	1.02863	0.975569	0.999931	0.5193	-1.08377	2.22048	0.74227	0.464279	2.68055	0.988939	1.9447	-2.11414	1.07949	2.41155	0.899804	-0.525801	-1.03005	1.04914	-0.484983	2.98408	1.14616	1.75451	1.00153	0.72449	0.605054	-0.611402	-0.307741	1.79445	-0.14546
Tmem242	ENSMUSG00000004945	-0.0658936	-0.0810723	0.242178	0.936364	0.988263	0.94615	0.985285	0.786354	0.999571	0.114723	0.906719	-1.48268	0.984923	0.999931	0.391827	-3.03034	1.0702	-0.185993	1.75852	0.780186	0.923257	-0.441444	1.11896	0.520208	-1.27126	1.06943	-0.506587	1.14806	-0.432295	1.16425	1.67804	0.452505	-1.25408	2.0698	0.476442	0.795199	1.69858	-0.0876983	-2.48559	0.0546199
Dtx2	ENSMUSG00000004947	-0.969747	-1.05504	-1.27229	0.0668741	0.448068	0.293409	0.843063	0.00571984	0.177062	-2.72377	-1.02451	1.37966	2.73922e-06	0.893309	0.209128	-0.163747	1.70956	1.62309	-0.890858	-0.246915	-0.829425	-0.452973	0.923787	-0.0595781	1.05804	-0.427711	-3.16424	-2.03223	-3.21954	-1.78041	-1.57939	-2.48088	-1.51283	-3.1415	0.324947	-2.45778	-2.06798	-0.365117	0.760191	0.613947
Hspb1	ENSMUSG00000004951	1.01436	-1.11084	0.857888	0.13188	0.606447	0.118683	0.67205	0.109042	0.736773	1.16628	1.76826	0.724297	0.766204	0.436144	0.701844	-0.851958	0.24453	1.41154	0.904095	1.71609	1.32649	0.961282	2.10699	-0.374151	1.4581	2.05818	1.83916	-0.368099	2.14335	2.32979	-0.50519	2.02196	1.59884	2.12588	1.7315	1.71203	1.98726	1.46209	2.0035	1.11751
Rasa4	ENSMUSG00000004952	-0.534962	-1.05357	-0.172968	0.417724	0.831116	0.283864	0.84198	0.638951	0.999571	-0.971145	0.283977	0.342127	0.741139	0.999931	0.689163	1.54336	1.84498	2.40173	0.90308	2.58751	0.671748	-0.137714	-2.08625	0.817083	1.69562	1.4914	1.07801	2.76143	0.647709	-0.480202	1.92821	1.26195	2.91589	1.43581	2.05593	0.937947	1.46078	1.8808	3.24511	1.13269
Hnrnpa2b1	ENSMUSG00000004980	-0.30494	0.0260408	0.0758297	0.159085	0.641005	0.916571	0.978791	0.649495	0.999571	-0.0290346	-0.279663	0.0209491	0.986046	0.999931	0.964365	3.4438	2.5896	3.14035	3.06276	3.08551	2.64941	2.74658	2.99851	3.04718	3.00096	2.92485	3.24422	2.66414	2.98497	3.32262	3.29969	3.41918	2.4426	3.03777	2.90225	2.61253	3.1007	2.72806	3.18022	2.9909
Prkacb	ENSMUSG00000005034	-0.375369	-0.101644	0.0388759	0.292346	0.76812	0.809092	0.961323	0.875665	0.999571	0.148683	0.135757	-0.270899	0.951756	0.999931	0.711451	2.78693	1.93602	2.87806	2.69734	3.32617	2.22092	2.16722	3.20258	2.49516	2.68288	2.43263	2.61073	2.40572	2.62786	2.19621	3.24326	3.42174	2.40184	2.44852	2.88629	2.54659	2.23304	2.73198	2.37539	2.83248
Sgsh	ENSMUSG00000005043	0.0159507	-0.697646	0.125644	0.981814	0.995123	0.581836	0.913383	0.886187	0.999571	-0.335369	-0.578133	0.0903985	0.957281	0.999931	0.969365	-0.782979	1.70139	-0.350939	-0.703817	-2.17347	-0.520188	0.298133	-2.07588	0.277685	1.96833	-0.997613	1.82853	-1.6399	0.33046	-0.912429	-0.730657	0.243236	-0.229701	1.00317	-0.406699	-2.85756	3.04337	-2.99494	3.14427	-1.67718
Chd5	ENSMUSG00000005045	-0.655252	-0.796499	0.22428	0.287705	0.764406	0.353246	0.857886	0.76173	0.999571	1.49757	0.614031	-2.03615	0.435173	0.999931	0.048269	-3.163	-0.352801	-1.6558	1.11018	-1.37517	-1.23911	-0.048518	-2.69281	-3.56634	0.647465	-1.3332	-0.804544	0.368607	0.760124	-2.48416	1.19619	-1.05359	0.476988	-0.214191	-0.187992	-1.47944	-0.947745	-2.53718	-3.06084	-2.20185
Cstb	ENSMUSG00000005054	-0.00546337	-1.1549	0.480062	0.987506	0.99614	0.253491	0.832289	0.0913558	0.699774	0.000700136	0.269482	-0.646166	0.999667	0.999931	0.420903	2.73215	2.23102	1.88275	2.40654	2.14833	2.2886	2.56439	1.9034	1.94002	2.22989	2.48212	2.83099	2.40564	2.18798	2.7245	2.08149	2.25739	2.50578	2.39205	2.11009	1.94142	1.72654	1.99408	2.25464	2.43512
Sh2b2	ENSMUSG00000005057	0.0503401	-0.105891	-0.236841	0.942698	0.989299	0.882512	0.975183	0.646131	0.999571	-1.31654	-0.902094	-0.433429	0.633078	0.999931	0.678861	0.25081	0.999198	1.27199	-2.42406	0.419515	-0.14407	-0.312467	-2.25143	1.4314	-0.799143	-3.59498	0.379101	-1.06912	0.426016	-0.540617	-0.515214	0.482804	2.77396	0.105645	0.320634	1.19223	-1.01246	0.860079	-1.33846	0.336421
Jkamp	ENSMUSG00000005078	-0.241615	0.362243	-0.0165619	0.588309	0.905504	0.240828	0.823257	0.95653	0.999571	0.0366799	-0.183803	-0.095529	0.989763	0.999931	0.859142	2.01928	2.45316	2.31404	1.87275	2.66319	1.6054	2.30474	2.45261	3.39846	1.90215	2.15146	2.71319	2.02824	2.30348	2.19798	2.91555	2.41683	1.67805	2.61313	2.1044	3.06515	2.41053	2.4503	2.36834	2.26581
Cd44	ENSMUSG00000005087	-0.0930773	-1.28309	0.309106	0.830879	0.967717	0.165228	0.745985	0.395112	0.999571	-0.187116	-0.114436	-0.517132	0.970882	0.999931	0.659556	2.61349	2.49576	1.88253	2.24444	2.81171	2.11423	2.45023	2.98852	2.02898	2.21907	2.12759	2.39043	2.27931	1.75544	1.99836	2.15383	2.63396	2.38309	2.34018	3.26966	1.91513	2.01868	2.11168	2.25195	1.59929
Slc1a2	ENSMUSG00000005089	0.542061	0.772909	0.505438	0.114686	0.571992	0.0791004	0.555995	0.147741	0.809565	0.571971	-0.186522	0.196318	0.790039	0.999931	0.735186	1.2937	2.34293	1.97106	2.58705	3.9634	2.89969	2.20198	2.58277	2.94327	3.0668	2.76164	2.21752	2.0763	2.96982	2.42015	2.8347	3.36926	3.0218	2.42383	3.5651	3.06181	2.38222	3.32756	2.51996	2.71588
Eif2ak4	ENSMUSG00000005102	-0.712206	0.845714	0.491117	0.207035	0.696575	0.350417	0.856465	0.546201	0.999571	-0.491308	-0.602265	-1.67817	0.949635	0.999931	0.317589	-1.11888	-0.286536	1.23101	1.15739	2.65369	-0.391459	-0.499629	0.544933	0.755008	0.832183	1.58184	-0.160049	1.22297	-0.836997	-1.4504	0.498481	0.756351	1.61762	0.379405	1.04113	0.218681	-0.430221	-0.966193	-1.66584	-0.574573
Wdr1	ENSMUSG00000005103	-0.2947	-1.25948	-0.148789	0.585171	0.904384	0.204969	0.797336	0.760871	0.999571	-0.479007	0.471838	0.741302	0.931877	0.999931	0.665566	1.70059	1.72356	1.68458	1.50115	0.998312	1.36633	1.70062	2.45323	1.50322	1.70672	1.88863	2.25694	0.80908	1.087	1.04124	1.6039	1.58498	2.24533	1.39956	1.78353	1.66331	1.54116	1.47642	1.86202	2.38176
Wisp1	ENSMUSG00000005124	1.16135	0.950472	0.672777	0.0687828	0.454648	0.37088	0.863388	0.232258	0.936854	1.05141	0.122051	-0.851941	0.833305	0.999931	0.562269	-3.21219	-3.06195	-0.444827	-3.37328	-2.88308	0.0747772	-0.233387	-2.66955	-0.248844	-0.790972	-3.26833	2.69632	-2.77908	-0.139604	-2.54398	-0.115577	0.422547	0.261018	-3.18191	-3.42216	0.577057	-1.56895	-0.558893	-2.89827	-2.00925
Ndrg1	ENSMUSG00000005125	0.598404	-1.55892	0.298743	0.166992	0.651509	0.100992	0.628804	0.591764	0.999571	0.267337	0.286713	-0.45981	0.948425	0.999931	0.703666	0.422831	2.39337	2.66852	1.61356	2.11623	2.46498	3.37782	2.74376	2.03219	1.60327	2.16661	2.44737	1.73039	2.79718	1.78066	2.14354	1.97138	2.57367	2.34412	1.70346	1.53436	1.19657	1.7632	1.87465	2.28537
Man2b1	ENSMUSG00000005142	-0.141754	-0.582775	-0.0531788	0.596906	0.90823	0.34316	0.854028	0.804661	0.999571	-0.353178	0.204741	-0.237071	0.880619	0.999931	0.734018	2.59933	2.39288	2.80169	2.29531	2.56249	2.22345	2.59529	2.37114	2.10496	2.26253	2.69132	2.90412	2.47638	2.36447	2.44051	2.60242	3.12582	2.57814	2.6558	2.18457	2.07578	2.19596	1.92507	2.49792	2.77918
Prdx2	ENSMUSG00000005161	1.23996	-0.687193	-0.349708	0.00240929	0.071925	0.578168	0.913383	0.391436	0.999571	0.521551	0.0228038	1.92116	0.937067	0.999931	0.000561409	-0.759281	2.33278	0.224473	-1.07397	2.64448	2.07199	1.50429	-2.58894	0.611138	0.571707	1.03562	-3.16412	-2.51717	1.64998	2.18531	2.23094	0.871423	1.60115	2.38503	2.40207	0.345523	1.4145	-0.140131	1.96561	-0.116863
Polr2a	ENSMUSG00000005198	-0.509389	1.66522	0.599392	0.38049	0.815438	0.0239864	0.2844	0.109144	0.736773	0.667895	-1.34729	-0.733384	0.92231	0.486257	0.569689	1.51461	1.39317	0.926831	2.1209	1.79104	1.40829	1.4963	0.953592	2.766	1.27142	1.48763	2.63925	1.65347	1.87654	1.85856	1.42523	2.26079	2.66426	2.39738	1.43098	1.41769	1.58522	1.24028	1.58491	1.35763
Senp3	ENSMUSG00000005204	-1.1608	-0.334386	-0.353309	0.0694076	0.457337	0.756101	0.950774	0.647969	0.999571	-0.617169	0.00532232	-0.522856	0.941932	0.999931	0.638737	0.645949	0.5139	0.119772	1.06821	-2.08972	-0.769665	-0.633029	1.54836	0.574989	-0.300292	-1.46773	0.881447	-0.540824	-0.721562	0.0289497	0.049569	0.736539	0.517734	0.420813	0.66232	-1.49165	0.352269	1.40424	-0.797309	1.40997
Ufd1	ENSMUSG00000005262	-0.145257	1.55246	0.314816	0.85836	0.971956	0.045462	0.417798	0.682767	0.999571	-0.280672	-0.555208	0.0345833	0.972444	0.79445	0.987563	0.266312	0.913676	0.554603	1.09464	2.87545	0.740989	0.0986861	3.26711	2.65531	1.53234	2.20075	0.00359678	1.20043	0.688799	1.13497	-0.884789	1.31815	1.43255	1.40329	3.545	1.39902	2.39894	1.08641	0.75833	1.12435
Prlr	ENSMUSG00000005268	0.722782	-0.171828	-0.736581	0.160403	0.642994	0.856077	0.969005	0.241013	0.945477	-1.17659	0.165108	-1.67258	0.836117	0.999931	0.273954	0.453563	1.63723	0.612784	-0.532894	0.409667	1.65816	0.71223	0.521108	0.544851	0.562836	-0.503828	-0.483495	0.813613	-0.246993	-1.68736	0.38762	0.47364	1.29017	-1.14567	-0.0883759	1.59243	1.03491	-2.9525	-2.08347	-0.667176
Letm1	ENSMUSG00000005299	0.486799	0.56853	0.518102	0.307902	0.775145	0.539904	0.903642	0.336464	0.999571	-0.238887	-1.3024	0.867654	0.972444	0.790386	0.137786	1.92214	1.55301	0.0164545	-0.265894	0.813157	1.85187	1.88775	-2.65241	1.7315	-1.07683	1.67285	1.69594	1.48532	0.916119	1.64239	1.97588	0.568757	2.00549	0.947435	0.390727	0.360437	0.101053	0.809975	3.91072	1.93014
Ubqln1	ENSMUSG00000005312	0.858871	0.145095	0.321193	0.129134	0.599456	0.898651	0.977442	0.67671	0.999571	0.0479604	-0.135154	0.122598	0.992187	0.999931	0.952165	0.612268	1.45104	1.09507	1.39442	2.52767	2.5837	1.25938	0.105831	1.4452	1.73246	2.20938	0.352023	1.42947	2.06692	3.13959	1.72026	1.14243	0.577999	2.17828	1.74618	1.0403	2.04376	2.01842	1.54584	0.83677
Cadm3	ENSMUSG00000005338	0.596132	0.869716	-0.442888	0.387471	0.815684	0.394145	0.866357	0.541978	0.999571	0.9821	-1.04402	1.73668	0.875124	0.892245	0.0148973	0.753959	-0.344499	0.379084	-0.972575	1.18203	0.903681	-0.524713	-2.07791	1.63209	-1.58168	0.555761	-3.37486	-1.39109	0.787615	-0.777411	3.24485	1.03161	2.05826	0.504817	0.915382	0.572209	0.755885	1.93836	2.21464	0.362595
Txn2	ENSMUSG00000005354	0.225177	-0.549622	0.779741	0.767396	0.952464	0.672465	0.931023	0.270501	0.967321	0.649953	-0.816526	-0.443605	0.925828	0.999931	0.78311	1.61412	1.95068	1.37816	1.2987	2.28675	1.76225	1.08127	1.79087	1.84437	0.298405	2.14518	1.74491	1.9353	2.30932	1.86993	1.53715	1.69681	1.6166	1.54457	1.78756	0.137578	1.88839	0.201081	1.72764	2.04865
Slc1a3	ENSMUSG00000005360	0.191015	0.935663	0.51759	0.577982	0.901831	0.0580259	0.473864	0.0723828	0.654112	0.520894	-0.0450397	-0.230943	0.858958	0.999931	0.692453	1.754	2.16473	2.05024	2.50914	3.43523	2.9468	2.56391	3.22225	3.30922	2.2844	2.93851	2.56535	2.54353	2.76057	2.26404	2.5543	3.51748	3.28629	2.48963	3.03815	3.02115	2.29882	2.82339	2.3732	3.07736
Crbn	ENSMUSG00000005362	0.825085	0.698505	0.096208	0.0986781	0.535714	0.51286	0.896527	0.913444	0.999571	0.397053	-0.0668835	0.65301	0.954602	0.999931	0.75956	-0.209752	1.24255	0.838861	1.26805	0.336294	2.42172	1.51757	2.66632	1.07845	2.83279	-0.198417	2.18497	-2.02171	1.40735	1.66272	0.473215	1.35617	0.863008	-0.32952	1.07701	1.21756	0.706091	1.53209	1.41192	1.84822
Fbxo11	ENSMUSG00000005371	1.12069	1.02163	-0.115241	0.0444929	0.366558	0.315477	0.848183	0.883531	0.999571	0.759318	0.822672	-0.00822405	0.906082	0.999931	0.996905	0.47559	0.790512	0.177191	0.322993	0.460506	1.58148	1.61294	1.70284	1.27793	-1.41012	0.0672246	-0.174583	0.536294	2.74368	2.04758	0.749893	0.575908	0.970018	1.49127	0.630568	2.25707	1.22359	0.860457	0.281941	1.12798
Mlxipl	ENSMUSG00000005373	-1.98691	0.46282	-1.34118	5.21193e-06	0.000998129	0.497968	0.892718	0.0428606	0.524445	-0.413931	-1.14041	1.41503	0.948492	0.623966	0.368915	1.75888	2.33523	0.890929	1.64925	1.01909	-0.666847	0.666803	1.00119	1.64943	1.24052	-1.06721	1.54145	-0.535545	0.858567	-0.258121	1.48269	0.892803	1.89664	1.18227	1.03341	0.631045	-0.475503	0.635075	1.94064	1.64637
Bud23	ENSMUSG00000005378	0.319445	-0.397958	0.732264	0.633968	0.921423	0.755213	0.950737	0.325742	0.996524	-0.0385193	0.642096	-0.969047	0.995335	0.999931	0.605812	-0.0828808	1.29089	0.444161	1.67733	1.1571	2.03844	0.29886	0.16075	0.465553	-1.02113	0.069063	2.62544	0.696647	1.08067	2.69196	0.941434	1.01489	1.23474	1.07164	1.11766	0.71433	0.762958	0.389963	0.513018	1.06146
Mcm5	ENSMUSG00000005410	0.162531	1.12463	0.0602301	0.790502	0.957791	0.200362	0.793746	0.896679	0.999571	0.247265	-0.175904	-1.78123	0.953849	0.999931	0.157095	-0.411978	-2.94362	-1.96715	-2.14757	-0.627298	-0.173485	-1.18941	-2.879	-1.0237	-2.42639	-2.92724	-3.05756	-0.141967	-0.613727	-0.121226	0.349799	-0.940726	-2.52026	-2.93354	-1.10573	-0.788511	-2.91972	-0.191607	-4.22607	-0.953843
Hmox1	ENSMUSG00000005413	-0.300743	0.222078	0.00613978	0.686111	0.935551	0.791681	0.958728	0.992485	0.999862	-0.565478	-0.385307	-0.193655	0.942554	0.999931	0.915653	1.57669	1.79275	1.06386	0.859053	2.15053	0.95137	1.0413	1.63606	1.85921	1.25388	1.60033	0.863904	1.55328	0.903174	1.40153	1.14614	1.40949	1.06626	1.31501	2.83532	1.08843	1.90597	0.840627	1.39302	1.57622
Mprip	ENSMUSG00000005417	-0.139847	0.49559	0.0182416	0.766893	0.952464	0.338628	0.852804	0.963905	0.999571	0.242294	-0.412286	-0.741242	0.949635	0.999931	0.0483254	2.30679	2.08494	1.84125	2.26178	2.16856	2.2557	2.12921	1.88199	2.42944	2.29932	2.29486	0.883897	3.07781	2.8688	2.51666	2.58241	1.86373	1.20079	2.68139	1.63978	2.08636	2.19721	3.2286	1.86974	2.45944
Cic	ENSMUSG00000005442	-0.301282	-0.214853	-0.205487	0.525583	0.8818	0.793071	0.958728	0.692149	0.999571	-0.0581944	-0.126885	-0.832002	0.990192	0.999931	0.308869	2.18545	1.58751	2.1215	2.06608	2.093	1.94405	1.63973	2.75872	2.03601	1.6375	0.843736	1.89655	0.353272	1.6902	1.73538	1.75234	1.84609	2.63764	1.52734	2.05011	1.73512	1.42855	0.919584	0.366978	0.630226
Pafah1b3	ENSMUSG00000005447	0.972308	-1.94734	0.556752	0.0481581	0.380611	0.0102982	0.165064	0.430371	0.999571	-1.65204	1.43397	-0.589505	0.272265	0.577087	0.782747	-3.33225	0.545489	1.72101	-0.756042	1.0838	1.28135	-0.271666	-2.48413	-2.60776	-0.376131	1.39065	0.467497	1.68414	-3.38978	-1.65351	-0.183783	-2.64309	-0.0135901	0.947591	-0.0132941	0.251675	-0.552153	-0.847809	1.15545	-0.828555
Prkaca	ENSMUSG00000005469	-0.133789	-0.332527	-0.877604	0.738696	0.950167	0.595515	0.915831	0.0648841	0.622445	-0.256222	-0.206788	0.950246	0.947516	0.999931	0.611055	1.46618	2.17799	2.14379	1.83443	1.47795	1.86364	2.00838	2.08252	1.75629	2.44432	1.3985	2.03622	0.673602	1.96314	1.76839	2.18532	1.75334	1.55838	1.11476	1.78154	1.5699	1.76854	2.27813	1.79749	1.22807
Asf1b	ENSMUSG00000005470	0.248637	0.805221	0.718957	0.424334	0.834695	0.389911	0.865974	0.0784286	0.673598	-0.043266	-1.61619	-0.595638	0.990148	0.627029	0.760766	-2.94677	-0.474121	-2.3987	-0.443074	2.09529	-0.13435	-2.81688	-3.09444	0.699917	0.562209	-2.77777	1.50212	0.969782	-0.526433	-2.71549	-2.76314	-2.42244	0.113562	-2.83476	0.355502	-2.41541	-3.0544	-0.792939	0.932992	-0.632829
Ddx39	ENSMUSG00000005481	1.57424	1.31327	0.452101	0.0129236	0.188397	0.175392	0.759233	0.421373	0.999571	0.97248	-0.739079	-0.416896	0.875027	0.999931	0.677294	-1.9718	-2.91436	0.167168	-1.42474	0.652111	0.19113	0.645407	-1.72287	0.421894	1.55068	-0.372433	-0.417582	-0.921803	0.237573	-0.235374	2.05803	0.878178	-1.28622	-0.402171	0.396709	0.310674	-0.443933	1.03739	-1.34599	-0.841097
Dnajb1	ENSMUSG00000005483	0.0751064	-0.135356	0.712059	0.876876	0.974886	0.905494	0.977859	0.093451	0.703568	0.720952	1.26686	-0.627794	0.906866	0.821365	0.651285	1.51864	-0.0685787	0.786031	0.506504	-0.0109146	0.991706	1.01335	-2.00205	0.322195	1.2428	1.66981	1.79493	2.33513	1.06338	-0.916471	4.04124	1.24537	2.25651	0.590305	1.26302	2.32404	2.27175	2.15747	1.63693	-0.084273
Usp40	ENSMUSG00000005501	0.493032	-1.12617	0.247115	0.412214	0.829535	0.350238	0.856465	0.765337	0.999571	-1.17092	0.123867	-0.655398	0.799969	0.999931	0.701898	0.428033	2.4706	0.560185	0.295098	-0.211373	1.59726	2.10817	1.62411	1.14645	1.83561	0.0341722	2.75233	1.92021	-0.145556	-0.728746	-0.470599	1.14542	2.5649	0.612805	1.86695	1.46597	0.927071	2.19214	1.93888	1.23841
Celf1	ENSMUSG00000005506	0.499769	-0.668585	-0.855137	0.33334	0.792177	0.465207	0.888383	0.0614259	0.608577	-0.215376	1.0289	2.61208	0.957281	0.935356	6.8071e-09	-0.268795	1.34019	2.75812	1.32653	2.29112	2.01886	1.34966	2.18217	1.42452	1.34137	1.9155	-0.623598	-1.04789	1.88396	1.92598	1.54243	2.24975	1.28564	2.50045	1.03979	1.62386	2.06268	1.75226	2.74571	1.26564
Ndufs3	ENSMUSG00000005510	-0.400601	-1.094	-0.149069	0.338218	0.795564	0.20985	0.797336	0.706103	0.999571	-0.0650015	2.24297	-1.03074	0.983283	0.305041	0.441976	2.25073	2.27666	2.24166	2.75111	2.7286	2.2915	1.46651	2.39253	1.47697	1.52362	1.44263	2.35249	1.80017	2.11523	2.0331	2.58355	1.81063	1.99649	2.08199	1.543	2.99671	1.61091	0.746861	1.62376	2.48474
Por	ENSMUSG00000005514	-1.25061	-2.03041	0.435486	0.0146792	0.201162	0.00500371	0.099479	0.560756	0.999571	0.119963	1.1103	-2.03634	0.983394	0.847319	0.0204906	1.38705	1.89439	0.66117	0.396045	0.179251	-1.31192	0.946419	-2.23556	-1.47634	2.07916	0.303888	2.03788	2.91694	1.20949	-0.0762882	-0.315384	1.83784	2.91181	0.186669	0.537393	1.11739	-0.906053	1.83203	-0.878364	1.0757
Igf1r	ENSMUSG00000005533	0.139175	-0.786907	-0.290734	0.734299	0.949344	0.367518	0.863388	0.500781	0.999571	-0.299473	1.68253	1.78671	0.947516	0.597106	0.0296219	1.32968	2.387	1.85978	1.52252	1.34822	2.38292	2.05098	1.53492	1.76901	1.67643	1.61918	1.80815	1.15402	1.65694	1.45974	2.61564	2.55203	2.26664	2.45775	1.32031	2.29274	2.00956	2.28922	2.46856	2.6396
Insr	ENSMUSG00000005534	0.224544	0.702495	0.782478	0.775056	0.952909	0.556458	0.908332	0.278453	0.975348	-0.00926403	0.908985	1.40637	0.999034	0.999931	0.168403	1.07634	-3.082	0.287035	-0.584843	0.00543031	-0.548382	1.37372	1.62617	0.435868	2.21489	1.4744	-0.450726	-1.18333	-0.239496	-0.675874	-0.16955	1.43239	0.00389992	-0.132558	-0.489661	1.38798	-0.979819	1.54798	1.50859	0.870735
Trim28	ENSMUSG00000005566	0.488794	0.184377	-0.496593	0.363886	0.807586	0.77642	0.955562	0.35384	0.999571	-1.04637	-1.87547	-1.1543	0.689116	0.402474	0.525645	-1.05465	1.77798	1.4778	-0.910748	0.407232	0.872107	1.08656	-1.88625	2.09034	-0.327151	1.16538	-0.435182	2.22138	1.04628	0.0728814	-0.0326103	0.909269	2.38303	1.04011	-0.169074	0.386484	1.34036	-0.260138	-0.962779	0.83034
Ube2m	ENSMUSG00000005575	-0.149248	-0.212088	0.557574	0.788671	0.957791	0.865522	0.970894	0.232757	0.936854	0.7599	1.87241	-0.888728	0.906866	0.572162	0.52711	0.911661	0.788495	0.521121	1.5175	0.287245	1.58753	1.019	1.1865	0.710522	1.1409	1.46302	1.99072	1.66974	1.54932	-0.171504	1.61427	1.98176	1.84316	0.170953	0.269127	2.04924	1.78433	0.567966	1.2735	1.16035
Adcy9	ENSMUSG00000005580	0.962617	-0.0803143	0.75779	0.133668	0.608926	0.855444	0.968931	0.16766	0.84239	1.44501	0.259746	1.15611	0.241687	0.999931	0.437935	-3.48299	-2.89282	-1.70836	-0.0731416	-0.90517	0.911397	-0.496073	-2.28908	-1.52478	-1.21465	0.67647	-0.770149	-0.921707	1.50972	-0.580273	-1.10284	-1.57398	1.96983	-0.644766	1.20891	-1.50752	0.338158	1.75193	2.42034	-2.39217
Mef2c	ENSMUSG00000005583	0.0324464	0.23003	-0.0883761	0.92388	0.986155	0.367459	0.863388	0.770561	0.999571	0.157483	-0.35155	0.458959	0.950205	0.999931	0.551704	1.31221	2.72131	2.11999	2.01989	2.57378	2.15978	2.06028	1.35473	2.27424	2.73042	2.32782	1.86091	1.73414	2.35028	2.17708	2.59688	3.0624	1.73879	1.85016	1.58736	2.68593	2.23573	2.55825	2.2593	2.05366
Ctr9	ENSMUSG00000005609	-0.192975	-1.32104	-0.651914	0.71136	0.94372	0.235934	0.822915	0.25476	0.952284	-0.186872	-0.240717	0.229402	0.97839	0.999931	0.767439	1.55445	0.821873	1.0325	0.782531	-0.6691	2.19255	0.23471	0.0707354	-0.130395	-1.91031	-2.81197	0.590147	1.42751	1.0488	1.29047	1.41289	-2.53474	-2.09303	0.871254	0.229226	-2.53576	1.16624	-3.02415	1.47462	0.551477
Eif4g2	ENSMUSG00000005610	-0.193361	-0.22045	0.156857	0.505376	0.873929	0.661117	0.928153	0.556153	0.999571	0.131525	-0.16054	0.115598	0.957688	0.999931	0.887623	2.05525	2.25346	2.90884	2.97967	1.99091	2.98061	2.58238	2.95083	2.5422	2.28201	2.50647	2.62504	2.35801	2.29266	1.7712	3.35822	2.28012	2.64083	2.94562	2.10885	1.99305	2.64372	2.96639	3.0841	2.22808
Mrvi1	ENSMUSG00000005611	-0.225259	-0.134638	0.112889	0.760584	0.951095	0.910544	0.978526	0.897893	0.999571	0.693828	2.07856	0.656078	0.91481	0.448025	0.773153	-0.523657	1.44351	0.935639	0.797266	1.00669	0.338859	0.718167	1.05429	1.20409	1.23829	-0.110127	2.28223	-1.12941	2.15258	1.49692	1.21873	1.35079	1.05736	1.53504	1.1107	2.87475	1.83748	2.08036	1.33627	0.145859
Pcyt1a	ENSMUSG00000005615	-1.01021	-0.767452	-0.15933	0.193105	0.687251	0.484476	0.889713	0.846097	0.999571	-0.70044	-0.200392	1.14393	0.923641	0.999931	0.446597	0.254516	2.28325	0.984887	2.20156	-0.319355	0.551114	0.237049	3.13355	1.10654	1.36394	1.50374	-0.261402	-0.799779	-0.0862674	1.93587	-0.424194	1.49368	-0.487431	0.34809	1.00483	-0.928014	1.82731	2.04916	1.56749	1.24332
Zfp592	ENSMUSG00000005621	-1.38757	-1.17423	0.0549182	0.0324996	0.310998	0.307248	0.846056	0.921657	0.999571	-0.376279	0.559779	0.0123282	0.942554	0.999931	0.995454	-1.06741	1.56984	1.92379	1.61015	0.128098	-0.898523	-0.0801662	-2.11473	0.106076	1.42208	1.39351	0.930278	2.01773	1.27406	-1.00856	1.72362	0.332706	2.08771	1.15272	-0.2324	0.506533	0.728531	1.95804	1.3578	1.30677
Psmd4	ENSMUSG00000005625	0.232112	-0.869983	-0.22709	0.663588	0.929947	0.448001	0.882453	0.694409	0.999571	-0.695396	0.342541	1.68269	0.900795	0.999931	0.0673255	0.24136	1.1512	1.72795	0.47643	1.14622	1.20209	0.971141	-1.86751	0.862364	2.56498	1.18846	0.801156	0.0524733	0.812537	0.774254	-0.277999	-1.23107	3.00694	1.82599	1.27843	1.1911	0.860524	0.581586	3.0747	1.46881
Cabp5	ENSMUSG00000005649	-0.138474	0.54025	-0.470491	0.864754	0.97317	0.529345	0.899147	0.53728	0.999571	-1.2303	-1.05776	0.691101	0.756735	0.949923	0.443242	0.799625	-0.0357871	-0.195803	-1.20689	-2.62807	0.658064	-0.881685	-0.157023	-0.231815	0.162664	0.0516281	-0.221278	-0.709517	-2.79898	-0.649644	-3.35819	-0.157977	-0.0477738	-2.88834	-1.67251	-0.787423	-0.110191	1.43255	0.643141	-0.603055
Snx6	ENSMUSG00000005656	-1.06794	-1.73623	-1.02837	0.0758695	0.477497	0.0856174	0.577341	0.0966563	0.712624	-0.514126	0.124318	-1.11875	0.906554	0.999931	0.390794	2.11942	2.67824	2.42028	-0.0580967	1.69069	-0.0371173	2.33076	0.7815	1.71752	0.278984	-0.0722274	2.24205	2.6088	1.92223	2.08844	2.39966	2.02299	-0.0430077	2.58618	1.71936	1.22199	1.07651	2.00695	1.51211	1.96381
Mthfd2	ENSMUSG00000005667	0.484004	0.527739	-0.677957	0.291799	0.76812	0.640165	0.922883	0.14996	0.813107	-0.892767	-0.0513383	1.07487	0.880466	0.999931	0.389566	-0.694152	1.20697	-0.731897	0.669141	-0.674918	1.14138	-0.608087	1.60996	-0.344614	1.64613	-1.60271	-2.89032	-3.07282	-1.61864	-2.83382	-0.28257	-0.0216397	0.483421	0.170731	-1.22508	-0.231645	-0.473424	-2.16648	0.520848	0.950971
Pan2	ENSMUSG00000005682	0.667752	-1.28206	0.252997	0.305949	0.774172	0.0812407	0.563311	0.736115	0.999571	0.645006	1.36843	-0.143159	0.920074	0.610609	0.958795	-2.99528	1.38547	1.48413	0.973465	0.0446969	1.02124	1.54084	2.51736	-0.927756	-0.880247	-0.634913	2.24084	-0.929124	2.10501	-0.929269	-0.878414	-0.927312	2.18594	0.73072	-0.933779	1.75296	-0.841649	-0.627214	2.35435	1.15405
Cs	ENSMUSG00000005683	0.021854	-1.29397	0.0875725	0.966319	0.994149	0.203554	0.796656	0.865231	0.999571	0.129727	0.63833	0.387197	0.973205	0.999931	0.680718	1.52699	1.8995	1.99193	1.97696	1.89783	1.85655	2.12771	2.40312	1.559	1.4548	1.57527	2.32385	1.62423	2.19158	1.41076	1.88437	1.77729	1.54497	1.76779	0.667642	1.44704	0.905048	1.25777	2.0889	1.75477
Ampd3	ENSMUSG00000005686	-0.286403	-1.24117	-0.077604	0.462524	0.851568	0.0902493	0.593648	0.888226	0.999571	-1.03433	1.25914	1.28644	0.818771	0.811726	0.319772	-0.557374	1.61844	-2.31333	-0.0337926	-2.07048	-1.1628	1.33629	2.17459	-2.27009	-1.70259	1.5911	-3.02574	-1.96048	-3.4716	-1.75181	1.70648	2.58497	-1.19135	1.42911	0.343988	-2.30219	-0.661612	-0.35706	1.23379	0.951243
Bcas2	ENSMUSG00000005687	-1.45895	0.518809	-0.333871	0.0274825	0.289749	0.43066	0.879861	0.589367	0.999571	0.141679	-0.762647	-0.277124	0.97839	0.884732	0.841355	2.11537	2.08585	1.67423	2.25141	2.35404	0.483068	0.870341	2.17953	2.46977	3.27987	1.93779	-0.137541	0.0575547	1.97034	2.3081	1.18032	2.0045	1.50428	0.549064	1.88141	1.83155	1.22974	2.30368	-0.0319625	1.7408
Sh2d1a	ENSMUSG00000005696	-0.238449	0.350885	0.322903	0.457998	0.849611	0.394327	0.866357	0.209835	0.91694	-0.475253	-0.822805	0.215268	0.93916	0.783028	0.443142	3.1925	0.925534	1.76147	1.57817	0.0437953	2.69321	1.12771	1.40084	1.61292	0.946304	2.73409	2.96499	0.801942	0.79663	2.03955	1.36911	0.643356	1.66123	-2.73452	0.70447	1.37518	1.43812	2.45364	2.3686	0.809869
Ctcf	ENSMUSG00000005698	-0.250234	-0.190629	-0.221265	0.702214	0.941719	0.841861	0.967109	0.793127	0.999571	0.365909	0.18957	0.914641	0.95659	0.999931	0.65933	0.47676	0.265221	2.4165	1.43181	1.89961	2.11971	0.762097	0.929145	1.24911	0.815722	0.0403645	1.6475	-0.782063	0.380374	1.59109	2.36812	0.840177	1.09482	1.96276	0.822515	0.999676	0.275548	0.512851	1.3692	1.69051
Ranbp1	ENSMUSG00000005732	0.503382	0.35458	-0.364801	0.406827	0.826672	0.579317	0.913383	0.633726	0.999571	-0.171817	-1.52108	-2.30558	0.974377	0.654645	0.00108012	1.75472	1.21438	1.73144	0.710522	3.49294	1.29153	-0.578443	-2.68483	2.41658	1.31094	1.44198	1.78762	1.40992	0.779058	-0.511408	3.20097	-1.32821	1.86888	0.291597	0.437777	1.24225	-0.833783	-0.473024	-0.948967	-0.58189
Psmb4	ENSMUSG00000005779	-0.394208	0.432579	0.0274041	0.398945	0.822251	0.533444	0.900739	0.941819	0.999571	0.173105	-1.08287	0.261149	0.969165	0.731886	0.851147	2.12219	2.1242	1.58011	2.01541	1.63097	2.10131	1.24646	0.999488	2.56551	1.74338	2.26549	1.70006	2.30935	1.70385	1.16445	1.74988	1.96881	3.10825	2.03467	1.57961	1.77215	2.3721	2.1984	2.51461	2.03197
Slc30a4	ENSMUSG00000005802	1.52934	2.15275	-0.0175729	2.07607e-06	0.000531981	4.2798e-05	0.0022432	0.958502	0.999571	1.32028	-1.0747	-0.233655	0.60133	0.74096	0.830992	-1.02821	-3.26914	-0.307701	-0.0736648	-1.89819	1.72286	0.72172	1.86474	1.80693	1.98825	-1.36912	-3.12651	-2.01072	0.260734	-1.60732	-0.0409836	-2.66199	0.706332	0.253241	-0.0768978	0.300678	-0.0096463	0.845563	-2.16869	-0.18657
Sqor	ENSMUSG00000005803	0.70047	-0.292498	-1.02239	0.259884	0.740217	0.823195	0.963813	0.0707629	0.647411	-0.130639	-0.802654	-1.43355	0.986046	0.999931	0.420922	0.653869	0.978438	0.862703	-0.214817	1.46533	1.82759	-2.78934	-2.88922	1.0021	0.263833	-2.77633	-3.06127	1.93092	1.07725	1.64456	-2.70187	1.57935	-0.0814727	1.66163	-1.80244	-1.94695	0.81106	-0.847315	-1.99755	1.04183
Metap1	ENSMUSG00000005813	0.151697	-1.57425	0.0303414	0.829546	0.967717	0.044145	0.408873	0.970255	0.999589	0.564814	1.74129	-1.38131	0.941932	0.37301	0.402399	0.898927	1.40146	0.921874	1.19606	0.207268	0.975751	1.76295	1.18908	0.0648492	-0.175663	1.2908	0.207158	1.3656	1.62269	1.42675	1.38738	0.0589852	1.43238	1.93047	0.994172	1.03226	0.939476	0.998062	0.138851	0.922224
Gpr108	ENSMUSG00000005823	0.561476	0.270852	0.473308	0.433134	0.83832	0.814519	0.961539	0.536698	0.999571	-0.81564	0.0403315	-0.771433	0.918254	0.999931	0.334731	0.148338	0.918934	0.687551	0.452364	-0.0821639	0.755748	2.09865	2.37559	0.814656	2.4045	1.46429	1.35463	-0.463555	-0.456946	-0.265412	0.732094	1.02569	1.09978	0.502673	0.885568	0.836475	0.664517	-0.646711	-0.558649	0.918152
Rsl1d1	ENSMUSG00000005846	0.407931	-0.368182	-0.0464678	0.549156	0.891248	0.771611	0.954252	0.955066	0.999571	1.85937	1.26931	2.10144	0.316463	0.79134	2.01773e-05	-0.21868	1.58625	0.770223	1.45901	1.52764	1.49017	1.31908	1.66996	1.09931	-0.0880243	1.48664	-0.238335	-0.574039	1.93275	1.56735	2.6081	1.39857	1.4989	1.90504	2.00924	2.15137	1.72806	1.95356	2.12535	1.32529
Apc	ENSMUSG00000005871	0.255188	-0.803102	-0.281977	0.636244	0.92179	0.410974	0.874012	0.615028	0.999571	-0.441787	2.19608	0.372125	0.941932	0.343528	0.847544	0.136291	2.57702	1.61002	0.317227	0.755283	1.11935	2.39447	0.73392	0.477007	0.959251	1.50227	-0.239074	0.778735	0.970985	1.48486	1.62043	2.20271	1.3506	2.08322	0.441376	2.80739	0.71611	2.76748	0.524371	1.89749
Reep5	ENSMUSG00000005873	0.0914613	0.566886	0.284204	0.806877	0.962548	0.303792	0.846056	0.492865	0.999571	0.626545	-1.42002	0.456867	0.818771	0.448942	0.706542	2.35144	1.38288	1.82563	1.63479	1.40594	2.20031	2.0277	0.548026	2.84043	1.30676	2.17867	2.09917	1.5988	2.73788	2.047	3.10588	1.73821	1.97871	1.26558	1.38621	0.968423	2.22734	2.46814	3.02772	1.12971
Ergic3	ENSMUSG00000005881	0.292385	-2.03072	0.309763	0.64687	0.927218	0.00482716	0.0978242	0.661716	0.999571	-0.0102304	1.02443	0.49915	0.998131	0.832766	0.810193	0.19043	2.08528	1.66669	1.60602	1.53242	1.85092	1.13303	1.37789	0.142976	-0.412296	2.04796	1.54789	0.14963	1.50996	1.89573	1.46227	1.74744	1.35668	1.39771	0.29594	0.162027	1.23401	-1.02179	1.72311	1.45586
Uqcc1	ENSMUSG00000005882	-0.362384	0.918141	0.10707	0.638417	0.922389	0.285981	0.84198	0.880259	0.999571	-0.0165353	-0.829655	1.67034	0.997598	0.946208	0.0197888	0.439414	-0.709459	-0.227416	-1.00263	-1.39116	-1.27474	1.80648	1.16546	0.652152	1.96734	0.82292	-0.846105	-2.05727	0.618666	-1.27251	-0.530748	-0.428375	0.216447	0.655502	-0.471563	-0.300566	0.340185	-2.704	1.59023	1.62052
Ncoa2	ENSMUSG00000005886	0.0906759	0.260591	1.08479	0.910735	0.984287	0.828217	0.965736	0.103165	0.727533	-0.339338	0.412434	0.714221	0.957688	0.999931	0.711906	1.19031	-0.451056	-0.262604	-1.12945	-2.19965	-0.637042	2.33807	-1.97634	-0.193634	0.487523	1.15227	1.7177	-1.76064	-1.65728	-0.970957	3.39354	0.197497	1.71429	1.10283	0.346521	0.683912	-0.299372	-0.152806	1.47787	1.26286
Nr2c2	ENSMUSG00000005893	0.64961	1.69419	0.254702	0.384212	0.8156	0.0282958	0.31373	0.750969	0.999571	-0.532107	-2.00962	0.667538	0.950205	0.305092	0.703666	0.135794	0.527694	-1.07515	-2.13749	0.836689	0.150288	-0.296293	-2.09783	2.39619	1.92698	1.38087	-3.37031	1.39047	0.754915	-1.98399	-1.00846	-0.328208	-0.834659	-3.34393	-0.975935	0.944242	0.475715	0.491972	1.27843	0.22225
Nr2c1	ENSMUSG00000005897	-0.524718	1.85277	-0.0469702	0.506507	0.87501	0.0148489	0.208299	0.951457	0.999571	1.07733	-2.69595	0.0151066	0.862735	0.0029373	0.99613	1.30187	0.657363	-0.282567	1.49034	1.97118	1.33529	-0.664914	0.621126	1.99162	-0.264889	0.289872	-0.571675	1.33909	1.65645	1.34044	-0.281491	1.23778	1.25667	0.666116	1.05453	-0.255423	0.760656	1.15383	1.17721	0.642248
Smpd4	ENSMUSG00000005899	0.0510583	0.478927	0.38296	0.945284	0.989728	0.694998	0.934913	0.642031	0.999571	0.0721819	1.93136	0.0639981	0.991281	0.561734	0.978884	0.702123	0.150895	0.180311	1.43933	0.81697	1.35013	-0.0972932	1.94499	0.54931	0.534027	1.38293	0.305302	0.116873	-0.0432934	1.51645	-0.182979	0.283299	0.0722791	-0.262354	0.508075	1.79997	0.65785	0.42561	0.470178	1.68673
Pex1	ENSMUSG00000005907	-1.04052	0.338225	-0.842552	0.171702	0.658154	0.556172	0.908332	0.229535	0.934428	-0.458901	-1.46218	0.0280531	0.93977	0.417891	0.986175	-1.25509	0.92289	0.746215	0.911088	0.344675	0.0940558	-0.0109098	0.518863	0.851186	0.998341	-0.944875	-0.156425	0.877241	1.19103	-1.08672	-0.988228	0.37921	1.04056	-0.0300713	0.174451	-0.0328597	0.506859	-0.0026631	0.428989	0.0207363
Otx1	ENSMUSG00000005917	-0.225887	0.539657	0.171847	0.529976	0.884264	0.520486	0.898027	0.585668	0.999571	0.766397	0.437479	-0.21766	0.873113	0.999931	0.850209	-0.779287	-3.09985	-3.09949	-1.02887	-2.93553	-1.2296	-0.499764	-2.24623	0.0583817	-2.55875	-1.11394	-3.30535	-2.05221	-0.682296	-1.54428	0.947013	0.305047	2.15443	0.75397	-0.167379	-0.0181623	-0.859922	2.18218	-2.31944	-1.36925
Kctd20	ENSMUSG00000005936	-0.155449	0.689009	0.557768	0.842693	0.969618	0.561967	0.91063	0.457382	0.999571	0.730271	-0.314559	-0.364208	0.906866	0.999931	0.795565	-1.43098	-0.252917	0.342539	1.28329	-0.160993	0.0539388	-0.598267	1.62362	0.689489	1.84892	1.4767	-3.38867	-0.896899	0.608807	-0.325753	-0.864168	-1.92244	-0.755417	-3.28368	0.0787427	0.60356	0.0554958	0.780915	-1.21858	0.544395
Ctns	ENSMUSG00000005949	-0.42179	-0.302684	-0.988884	0.502119	0.872635	0.814355	0.961539	0.0789252	0.673598	0.242807	-0.628992	-0.245457	0.975569	0.999931	0.801194	-0.593285	1.20767	-0.563426	-0.738204	1.0943	-0.350513	-1.92643	-2.21427	1.04565	-1.52563	0.209327	-3.34186	-1.66973	1.0082	1.8269	-1.38668	-2.41212	1.08506	-3.02371	2.18804	0.513778	0.654174	-0.712723	-1.92589	-0.42889
Rcn1	ENSMUSG00000005973	0.489218	-0.934004	-0.541334	0.396224	0.821708	0.447902	0.882453	0.515332	0.999571	-1.62897	-0.465616	0.0941436	0.307695	0.999931	0.972169	1.38531	1.98047	-0.452393	-1.35845	-3.61251	1.66502	1.1441	-2.44697	0.355054	0.63507	-0.716998	1.78037	-2.42802	-3.094	1.75221	-2.21368	-2.95549	1.00901	-0.683682	0.0705572	0.270933	1.29964	-0.713903	1.49518	-0.866034
Trap1	ENSMUSG00000005981	0.392743	1.57872	0.98893	0.533439	0.885176	0.10483	0.638237	0.140836	0.804347	-0.0662888	-1.20242	-0.0647574	0.982164	0.90474	0.977676	-1.33074	-3.23698	-1.76426	0.306892	-2.23191	1.36219	-2.84133	-2.30824	-1.23548	0.0568903	1.66182	-1.11882	0.691499	-3.77058	-2.00997	-2.49641	1.65363	1.20293	-0.689798	-1.11475	-3.52062	0.702285	0.246511	0.850764	0.12326
Naa60	ENSMUSG00000005982	-0.107328	0.189391	0.511877	0.888044	0.977293	0.840705	0.966747	0.516961	0.999571	0.768469	-1.02324	-1.04854	0.926038	0.942362	0.117083	0.473244	0.0432619	1.09755	0.23117	1.35461	0.180298	0.830109	0.697151	0.728361	-0.862598	1.34965	0.361852	1.86259	0.620723	0.223161	1.20934	0.575507	0.102608	0.858061	0.550814	0.00766577	0.403067	-0.598143	0.453898	0.457353
Tpr	ENSMUSG00000006005	-0.262435	0.120205	-0.0187515	0.396544	0.821708	0.646823	0.92505	0.935314	0.999571	-0.608027	-0.131628	-0.358522	0.883427	0.999931	0.669156	3.03399	2.80527	2.41436	1.23223	1.16823	1.72825	3.11744	1.5045	2.60142	3.61056	2.99868	2.54395	1.71517	0.0890367	2.05388	1.98614	3.62805	1.98752	2.43346	0.729779	2.74235	1.88953	2.69592	1.61266	2.219
Odr4	ENSMUSG00000006010	-0.115535	0.0847598	0.256843	0.765495	0.95242	0.921267	0.979993	0.55192	0.999571	0.0981708	-0.605916	0.982224	0.983394	0.999931	0.108866	1.63508	2.03354	1.1586	1.32092	2.35342	1.72743	1.20004	-2.06235	1.56289	1.89155	1.10112	2.01333	2.40037	1.62793	-0.418779	2.23433	2.47113	3.20431	0.913974	0.834158	1.17242	0.492943	1.7121	4.69047	1.61794
Napa	ENSMUSG00000006024	-0.380887	-0.354342	-0.16966	0.585598	0.904622	0.762836	0.952409	0.77818	0.999571	0.369285	-0.251907	-0.514871	0.951016	0.999931	0.635753	1.7968	1.55141	0.795294	1.55023	1.43523	1.45905	0.660649	0.463419	1.37495	1.08399	1.47893	0.624498	2.74735	2.66783	1.95998	1.37693	2.44485	1.15507	1.57435	1.28923	0.930881	2.28847	2.10833	1.60109	1.92706
Sra1	ENSMUSG00000006050	0.592691	1.36264	0.561401	0.39768	0.821947	0.108957	0.646955	0.474587	0.999571	0.176054	-1.82769	-0.775446	0.978968	0.16353	0.217275	-0.413903	2.11346	0.862969	1.0222	0.774845	0.916298	1.82676	1.08301	2.21461	1.152	1.26992	2.27852	-0.0706542	1.79567	2.60035	1.48584	1.87941	1.50984	2.05219	1.09932	0.996847	0.945806	1.74953	-0.09799	2.52265
Atp5g1	ENSMUSG00000006057	-0.182898	-0.619121	-0.185461	0.694789	0.939668	0.48674	0.890264	0.731018	0.999571	0.205067	0.226749	1.2021	0.956375	0.999931	0.425894	1.10483	1.84802	1.74523	1.91124	0.257917	1.89027	1.93018	2.07925	1.58014	1.99411	1.68832	2.20693	0.623103	1.93976	0.734412	2.60935	0.43497	2.24106	1.43252	1.59396	1.7583	2.40301	2.38498	2.04719	0.766414
Snf8	ENSMUSG00000006058	-0.117987	-0.608415	0.281117	0.828	0.967293	0.55015	0.906478	0.588631	0.999571	-0.795025	1.81746	-0.401827	0.879349	0.531207	0.78351	1.86427	2.03478	1.50746	1.80137	1.94052	1.67173	1.75822	1.14602	1.53433	1.79083	1.5213	2.30652	1.465	1.32339	2.27555	1.67605	2.38412	1.94377	1.90515	1.5648	2.1972	1.17472	1.89877	1.53275	1.98319
Tbcb	ENSMUSG00000006095	0.31625	-0.227449	-0.027319	0.650352	0.928241	0.837561	0.966303	0.973304	0.999589	0.916218	-0.821124	-0.604331	0.878489	0.999931	0.776217	-0.834538	-0.142124	2.64574	-0.319776	-0.793291	1.33354	-0.53098	-2.59183	0.549562	-2.04963	-2.93104	1.59706	0.765693	2.12798	1.48418	1.32621	0.943499	0.946651	1.35804	0.126097	-3.01386	1.15411	1.58697	0.27045	-0.0677756
Inpp5k	ENSMUSG00000006127	-0.240912	0.271391	-1.57705	0.750318	0.951095	0.797877	0.959378	0.000608124	0.0391748	-0.466523	-1.04351	-0.215705	0.950205	0.943997	0.851147	1.79011	2.21977	0.46798	0.108097	1.47282	0.692306	-1.7005	0.715596	2.31246	-1.64948	-3.27379	-3.05045	-1.87378	0.11736	2.42376	2.01111	0.733611	-1.37425	2.45424	0.854705	0.761349	1.03894	-0.382563	-1.935	2.32492
Clint1	ENSMUSG00000006169	-0.311949	0.308598	-0.315477	0.50771	0.87501	0.348089	0.856373	0.542641	0.999571	-0.697692	-1.06922	-0.26979	0.907915	0.600632	0.868646	2.31921	1.74937	2.47567	1.47822	1.66505	1.41307	1.37836	1.38477	2.35888	1.23646	1.82981	0.312447	1.44821	0.451013	1.54551	1.43697	1.02781	1.22641	1.35705	0.979875	1.37051	1.62846	0.157612	0.956377	1.38208
Cdkal1	ENSMUSG00000006191	-0.602331	-1.98438	0.572063	0.337237	0.795096	0.00853122	0.145738	0.240997	0.945477	-1.13264	0.918746	-1.08914	0.838455	0.999931	0.513803	2.06917	1.57724	1.62485	1.34576	0.85513	0.666542	-1.19531	-2.65046	-1.9937	1.06672	0.987048	2.69817	1.92633	-0.665476	-1.11414	1.78392	0.854176	2.24756	-0.758811	0.184974	0.375742	0.977391	-0.638361	1.66344	-0.580841
Htra1	ENSMUSG00000006205	1.07006	1.77073	1.40425	0.126712	0.595573	0.0128364	0.188797	0.00181651	0.0834416	1.45513	0.606511	0.429219	0.400567	0.999931	0.802586	-0.946331	-0.522781	1.21669	0.454186	1.74276	0.59434	1.34574	1.56148	2.38702	1.79506	2.08241	1.74822	-0.0773077	2.02243	0.258314	1.46426	1.64438	2.06359	1.68076	1.06593	3.08265	1.19323	2.66868	1.93991	1.66347
Fblim1	ENSMUSG00000006219	-1.16921	0.0555997	-0.439859	0.0316774	0.308247	0.953788	0.98777	0.608	0.999571	0.579408	-0.814854	-0.708781	0.920074	0.990216	0.374269	1.68068	1.60489	1.31885	0.640967	0.182861	-0.759148	1.01366	1.20404	2.33331	0.551757	0.111344	1.90757	-0.467759	1.53688	1.84337	2.69249	1.30002	0.830056	1.64282	1.52459	1.24377	1.49036	2.07081	-0.51594	1.15109
Mob1b	ENSMUSG00000006262	0.462899	2.48284	1.53765	0.41359	0.830782	3.28995e-07	3.79364e-05	0.000467629	0.0337015	-0.355543	-0.868141	-0.902709	0.932713	0.783028	0.639149	-1.13824	-2.94493	-1.45126	0.529419	-0.706547	1.3196	-0.533747	1.23782	1.26245	0.224509	1.43058	1.52676	-0.354769	-2.96034	0.936026	0.696387	0.450203	-2.26056	0.655284	0.814419	-0.503542	1.7735	-0.227819	-0.672288	-0.428041
Atp6v1b2	ENSMUSG00000006273	0.170443	-0.0999664	-0.0373843	0.595939	0.90823	0.817584	0.961539	0.891024	0.999571	0.0680147	0.079974	0.393079	0.974377	0.999931	0.438321	2.63682	2.03291	2.9011	2.12406	3.25067	2.61345	2.67323	2.4857	2.22192	2.85638	2.50542	3.41121	1.92024	2.94312	2.7674	2.6172	2.55037	2.47151	2.20055	2.67496	2.30661	2.0531	2.03397	2.97365	2.44441
Eps15l1	ENSMUSG00000006276	0.773355	0.628507	0.241137	0.243504	0.730318	0.566151	0.91108	0.778103	0.999571	0.798371	1.51713	-0.621371	0.918254	0.745529	0.535754	1.9064	-0.339454	1.01565	0.53571	1.10255	1.42211	1.28824	1.15822	1.25509	1.63008	-0.12864	1.27088	-0.270488	1.31903	1.59812	1.389	1.25801	1.1958	0.55651	1.21167	2.29646	0.663243	1.69214	-0.319183	-0.0195889
Tep1	ENSMUSG00000006281	0.397435	-1.52831	0.275157	0.416318	0.831116	0.0521237	0.447534	0.702589	0.999571	-0.906929	1.47271	1.8843	0.862735	0.697186	0.0750589	1.68424	1.22204	-0.213627	0.640001	1.07691	1.84551	1.34053	-2.51758	-2.20683	1.62383	1.72955	0.965897	-1.76891	-0.488594	2.82895	-1.58087	0.891355	2.2821	1.63814	0.487813	0.382059	0.460111	-3.30753	3.53136	0.0944193
Osgep	ENSMUSG00000006289	0.603169	-2.25213	-0.660263	0.274103	0.75159	7.74143e-05	0.00376652	0.367139	0.999571	0.0503033	1.66869	-0.625958	0.991903	0.579342	0.757706	2.36545	1.77064	1.56944	1.57579	1.79699	2.33431	1.47758	2.39105	-0.342621	2.08733	-0.415438	2.59423	2.00243	1.7979	-0.421172	1.97539	2.2456	2.17401	0.00826855	2.26083	2.08235	0.91751	2.45039	2.38133	0.333258
Aamp	ENSMUSG00000006299	-0.239178	-0.588075	0.93618	0.743114	0.950167	0.629072	0.921059	0.134389	0.792564	0.88395	0.388491	-0.835378	0.85329	0.999931	0.147165	0.892652	2.11192	1.59203	1.89203	1.64801	1.19468	1.6463	2.03651	1.94501	1.52304	2.29511	2.40491	0.945991	2.16207	2.25228	2.41044	2.00886	1.75168	2.29699	1.89702	1.84177	2.34437	1.89815	0.926425	1.48429
Tmbim1	ENSMUSG00000006301	-0.162951	-0.328662	-0.0505144	0.670014	0.930613	0.598974	0.916188	0.929446	0.999571	-0.226633	-0.0207309	-0.25405	0.953685	0.999931	0.803179	0.886	2.14246	2.014	1.57159	1.10912	2.32416	1.57237	1.25204	0.589958	1.70071	0.220177	2.77279	1.19995	1.48111	1.734	1.3523	1.17148	2.06853	0.57376	2.6648	0.657525	1.43909	0.74065	1.18848	2.08554
Arpc2	ENSMUSG00000006304	-0.305352	-0.0760599	0.0825673	0.146579	0.624464	0.818171	0.961645	0.612889	0.999571	-0.035787	0.078854	-0.468185	0.986046	0.999931	0.239952	2.79611	2.53262	2.83749	2.84059	2.40851	2.55437	2.79224	2.78172	2.5573	3.07201	2.82569	2.80242	2.84046	2.47485	2.53402	2.96323	2.47602	2.63344	2.48385	3.01393	2.60816	2.76513	2.91092	2.50957	2.72391
Kmt2b	ENSMUSG00000006307	-0.968553	-0.797374	0.0395418	0.0852452	0.501113	0.333454	0.851538	0.957926	0.999571	0.55094	0.9993	-1.71273	0.950205	0.987753	0.300542	0.762657	0.521624	-0.0664662	1.23598	1.93939	-0.15623	-0.453828	-2.671	-1.84786	1.37097	1.95679	-0.344777	1.46949	0.784999	2.97295	-1.45749	0.702369	1.51748	0.79408	1.29879	0.237546	0.199635	-0.890378	-1.6561	-0.12799
Tmem147	ENSMUSG00000006315	0.235828	-1.62532	0.161303	0.643678	0.925098	0.0233451	0.280409	0.831666	0.999571	0.0792631	1.66111	0.849521	0.991259	0.507934	0.637524	1.559	1.66886	0.848556	1.91818	-0.00374409	1.60605	2.57565	2.10276	-0.321375	1.31744	1.67897	0.780575	-0.198933	0.884608	1.69131	1.46156	1.33525	1.94597	1.47161	0.982585	1.13773	0.183464	1.72928	1.42701	1.56853
Rps9	ENSMUSG00000006333	-0.153281	0.121541	0.151931	0.297457	0.770552	0.583727	0.913383	0.253838	0.952284	0.00304316	-0.129663	0.216439	0.997967	0.999931	0.513394	3.28933	3.2933	3.26641	3.35825	3.51143	3.11461	3.33649	3.56981	3.45073	3.72161	3.21552	3.54802	2.95924	3.09378	2.98496	3.36893	2.99876	3.19622	3.19262	3.64696	3.17502	3.14049	3.17512	3.74803	3.21205
Ggt5	ENSMUSG00000006344	-1.18939	0.0178906	0.0654392	0.0254991	0.280029	0.988702	0.996828	0.930729	0.999571	0.487367	0.277268	-0.355392	0.949635	0.999931	0.835023	-0.646203	-0.0247873	0.145497	1.0798	-0.186377	-0.214558	-0.120228	1.62366	0.133126	0.583212	-0.133894	-0.646057	0.816613	0.85524	-1.12337	-1.3316	-1.15556	0.488269	-0.466731	0.261576	0.209149	0.134271	-0.0218575	0.511387	0.330394
Crip2	ENSMUSG00000006356	0.834062	0.153575	0.870838	0.143026	0.622653	0.872603	0.972966	0.239693	0.945276	0.841457	0.272663	-0.544273	0.85745	0.999931	0.703666	-0.45217	1.57429	0.78277	0.597365	0.283303	1.17099	2.53356	2.76519	1.61473	2.07592	1.31167	1.96487	1.66657	2.37111	-0.580226	1.93785	2.13583	1.72017	1.45476	1.9401	1.95125	2.45327	1.87611	1.35069	1.6171
Crip1	ENSMUSG00000006360	0.546877	0.424218	0.909091	0.299899	0.772146	0.634217	0.921269	0.0742813	0.661735	1.07476	0.542402	0.57217	0.663015	0.986164	0.349052	0.31599	2.13128	0.992862	1.5551	2.06257	1.98448	2.31834	1.43063	1.98484	1.55525	2.7519	2.16021	1.96877	2.86487	1.6773	3.00762	1.74176	1.94262	2.22449	2.95685	2.88927	3.01248	2.71847	3.39778	1.87815
Cbfa2t3	ENSMUSG00000006362	0.200746	-1.3492	-0.283218	0.714584	0.944261	0.205696	0.797336	0.631631	0.999571	-1.44154	-0.0117844	-0.95139	0.574191	0.999931	0.532009	-0.272763	2.03696	2.47858	0.139635	0.022504	1.73387	0.489739	0.295437	0.983036	-1.12139	1.21623	2.94773	0.951404	0.0366014	2.41044	0.594434	1.30265	0.932882	1.7949	0.0257857	0.506072	2.13442	0.49795	0.720129	2.08775
Fbln1	ENSMUSG00000006369	-0.647663	-0.494361	0.917434	0.0761031	0.477687	0.33671	0.852804	0.0827273	0.682501	0.372334	1.52171	-0.813648	0.947565	0.564487	0.558368	-1.32491	-3.04714	-0.145926	0.266703	-3.11548	-3.39166	-0.158124	2.55119	-2.4623	-2.07727	-1.09994	2.10548	-1.80777	-0.482109	-1.41615	-1.88624	-2.50462	1.51621	0.796229	1.0543	0.305657	-0.235955	-3.2243	-2.02233	0.0712437
Pgrmc1	ENSMUSG00000006373	0.26473	-1.00111	-1.00015	0.517157	0.87773	0.310141	0.846446	0.0830504	0.682576	0.44096	0.264444	1.06164	0.916767	0.999931	0.0273014	2.43687	2.44817	1.66916	2.30332	2.87371	3.08374	0.956245	0.617758	1.57259	1.43407	0.0832124	1.40731	1.9077	2.24674	1.60486	3.20364	1.90717	1.55438	2.5867	1.96371	1.59923	1.95929	2.90872	4.0986	0.956511
Tek	ENSMUSG00000006386	0.728922	1.21527	0.952068	0.205879	0.695574	0.216013	0.802382	0.034531	0.472333	1.82963	1.31931	-2.08129	0.0241444	0.865723	0.0130054	-0.51467	-2.99221	-1.32833	-1.38174	2.70377	0.260607	0.526589	2.04363	1.46108	1.2993	-0.611507	0.799048	2.13877	1.88014	-1.26526	1.43952	1.57612	-1.75817	1.85953	1.01471	2.27829	0.630091	-0.357253	-1.29726	0.20133
Elovl1	ENSMUSG00000006390	-0.496069	-1.10596	-1.17946	0.299016	0.771355	0.287194	0.842036	0.0408335	0.516283	-0.408486	0.652128	-0.54189	0.950205	0.999931	0.798283	1.75655	1.29809	1.02629	1.45335	-2.26889	1.20302	0.664725	2.46403	-0.00330594	1.2603	-3.658	0.726073	1.70495	0.405578	-2.15221	2.18708	0.298671	-1.44063	1.31323	-0.700016	0.16395	1.78671	-0.546769	1.11196	1.4262
Med8	ENSMUSG00000006392	-0.375215	-0.335713	-0.647123	0.601495	0.908723	0.735927	0.946444	0.341376	0.999571	-0.920505	1.40649	-0.505557	0.889274	0.719106	0.747754	2.41014	1.92572	0.54319	0.394926	0.0895209	0.786809	1.224	0.674311	0.677659	2.52347	0.378392	-0.0365224	1.82396	0.295227	-0.827098	0.54914	0.841459	1.24836	1.19626	0.539577	2.15547	1.65195	0.341527	1.14406	1.0795
Hyi	ENSMUSG00000006395	0.520382	-1.17312	-0.08531	0.390251	0.817057	0.332499	0.851538	0.897329	0.999571	-1.74934	-0.397509	0.715381	0.274239	0.999931	0.69477	-0.910909	1.78332	1.13329	0.563482	1.98917	1.24298	0.484985	-2.09391	0.762883	2.28131	1.28782	-0.107891	-0.636425	-0.69496	-0.0869938	-0.263126	0.946861	2.50869	0.793383	1.37464	-1.56682	0.506627	-0.141001	2.05112	-1.61254
Nectin4	ENSMUSG00000006411	-1.12849	-0.705786	-0.63777	0.0885715	0.50964	0.51698	0.897258	0.348359	0.999571	0.170963	0.128671	0.26711	0.972444	0.999931	0.898833	2.06984	1.99469	0.39851	1.9722	-0.326655	0.16227	1.62462	0.750486	0.439013	1.12304	1.47475	-0.612335	1.1867	1.92989	1.60025	0.710192	0.911189	1.00727	1.17633	0.685468	0.46948	1.67046	-0.143643	1.15096	1.24885
Pfdn2	ENSMUSG00000006412	-0.111207	-1.15943	-0.700498	0.8356	0.969211	0.268608	0.839783	0.31526	0.993702	-0.40349	1.666	-1.68522	0.938893	0.666333	0.149308	0.594092	1.94759	1.92874	1.84272	2.83222	2.01236	1.35279	1.18295	1.21718	1.88854	0.108605	0.523507	1.91968	1.81789	0.125392	1.74068	-0.290945	2.0145	-0.361214	1.23266	2.51958	-1.03273	1.84197	-0.1104	1.26752
Rnf114	ENSMUSG00000006418	-0.564447	-0.447796	-0.321277	0.316955	0.780359	0.622068	0.921059	0.450753	0.999571	-0.38352	-0.0401564	-0.349124	0.939404	0.999931	0.875934	2.29924	1.09429	2.24061	1.29277	1.00158	1.31594	0.848386	2.09731	0.90885	1.10693	2.01786	0.37874	1.29515	1.57449	1.60924	1.28249	1.05884	1.47752	0.983671	2.40874	0.824037	3.09871	0.730605	0.995373	0.753131
Neurl1a	ENSMUSG00000006435	0.784011	-0.384607	0.0565607	0.168839	0.653537	0.757058	0.951459	0.94253	0.999571	-0.224077	0.167762	-0.571174	0.978315	0.999931	0.774844	-2.57447	1.77782	0.165967	0.193112	0.178581	1.92233	0.531692	0.70842	0.527396	0.588099	-0.273302	1.42131	0.584234	0.964044	2.92316	-2.45888	0.713543	0.397391	2.01051	0.869513	0.283597	1.02464	2.56894	0.186642	1.74149
Zdhhc24	ENSMUSG00000006463	0.961066	-0.22958	1.47645	0.13382	0.608926	0.691545	0.933889	0.0401086	0.509353	-0.0178856	1.4729	-1.00775	0.995319	0.559398	0.658997	-0.885253	-3.06788	-0.814234	-0.0392754	-0.0311266	1.13211	-0.503719	-2.86138	-3.42691	-2.83432	1.90424	-3.05031	0.753953	-3.19674	0.868276	0.176083	-3.4363	0.304754	1.66289	-0.701771	-0.0408349	-2.62122	-2.95504	-3.28041	1.23747
Bbs1	ENSMUSG00000006464	0.256471	2.13341	0.0405897	0.73428	0.949344	0.00202978	0.0506609	0.958046	0.999571	-0.0786937	-2.28222	-0.414637	0.991259	0.0650564	0.841355	0.128871	-0.473111	0.502779	-0.0717707	0.770915	0.414704	0.0123868	1.87902	1.95997	0.838046	-0.279498	0.127426	0.939644	0.615757	-1.28613	-1.16133	0.463958	0.857205	-0.619431	0.4093	0.489937	0.252155	1.04048	0.594805	0.0504311
Nsmf	ENSMUSG00000006476	1.47332	0.410703	0.808758	0.00109717	0.0437896	0.733178	0.946267	0.231219	0.936092	1.93411	0.307022	0.770219	0.0957673	0.999931	0.678275	-0.185697	-0.496722	0.349395	0.322381	0.313467	2.21981	1.90151	2.69136	0.494235	-1.37744	1.18809	0.45307	-1.72012	1.93228	1.05606	2.1775	2.96859	1.26895	-0.646897	0.75085	0.616309	0.930943	-0.332923	0.663175	0.590587
Pdk1	ENSMUSG00000006494	-0.150805	-1.14443	0.377885	0.831158	0.967717	0.323501	0.849251	0.46542	0.999571	-0.91775	0.136657	-0.29094	0.883353	0.999931	0.779057	1.57331	1.9777	0.595978	-0.371842	0.32706	0.602822	2.26405	-2.12636	1.2674	-0.656305	1.67278	1.45298	3.06944	-0.287299	-0.778798	3.96015	1.56489	2.1808	1.93211	0.740603	1.34284	0.226582	2.15414	2.20571	1.76776
Ptbp1	ENSMUSG00000006498	-1.03456	2.33546	0.137442	0.00669403	0.126539	7.00641e-06	0.000524616	0.787428	0.999571	1.91994	-1.10854	-0.142454	0.0474125	0.845289	0.952165	0.0840903	-3.05556	-0.602655	2.01903	-0.696885	-0.292955	0.0680951	0.375887	0.0988444	0.369624	-1.29297	0.0438534	0.267691	0.989965	-0.140242	0.0785207	-2.99446	0.418095	1.21879	-0.0535137	-0.391877	-1.79494	0.96018	-0.122615	0.0522856
Cyba	ENSMUSG00000006519	-0.139313	-0.705081	-0.196517	0.691491	0.937597	0.311816	0.848183	0.502772	0.999571	-0.404934	0.232828	-0.511062	0.883427	0.999931	0.595682	2.50472	2.38385	2.72691	2.20592	2.18135	2.11001	2.45223	2.78729	2.08922	2.03012	2.19528	2.71451	2.17467	2.20338	2.80637	2.09697	2.25714	1.9697	2.50894	2.30321	2.06333	2.19146	2.06525	2.15717	2.63047
Atp7b	ENSMUSG00000006567	0.0510956	-0.720912	-0.191454	0.94373	0.989299	0.340364	0.852824	0.668813	0.999571	-0.378653	1.29537	0.338832	0.943372	0.726296	0.812803	-0.897734	-3.14949	-0.685233	-0.577237	-2.36675	-0.0406486	-2.65068	0.57424	-3.32832	-2.50841	-3.39287	-0.512697	-3.01819	-3.3792	-2.81626	0.894397	-0.706958	-2.10821	-3.29179	-0.818433	-0.81815	-1.85924	-0.173788	-0.261353	-0.692964
Rundc3a	ENSMUSG00000006575	1.69394	-0.136127	0.419247	0.00148389	0.0537596	0.7701	0.954252	0.370823	0.999571	2.40464	1.63032	-0.317185	0.000166334	0.461576	0.799758	-2.81578	-2.94639	-1.82127	-0.0693508	1.56024	2.01179	0.359658	0.595035	-1.90087	-2.48259	0.713381	-2.88564	-2.23542	1.91556	0.722298	1.67526	2.28996	0.175692	-0.489125	-1.67762	2.35175	-2.41326	-0.290407	-2.13198	0.958272
Slc4a3	ENSMUSG00000006576	-0.327735	-0.806382	-0.673651	0.6062	0.91029	0.504933	0.893545	0.14519	0.806331	0.590426	2.07507	1.45816	0.935107	0.494598	0.272646	-3.06624	1.71779	-0.0171351	-0.0181939	0.688963	-0.218004	0.440323	3.23746	0.375816	0.125529	-0.52087	-3.03599	-2.47603	1.57336	-2.31952	0.36067	0.700432	0.756692	-0.346876	0.214809	2.86923	-0.0575381	0.501912	0.720098	1.77887
Cdt1	ENSMUSG00000006585	-0.305172	-0.218308	0.908474	0.697858	0.940291	0.868456	0.971508	0.201967	0.906653	-1.32725	-1.30658	0.571492	0.674716	0.820942	0.771954	1.43336	0.580393	0.601986	-0.378006	-3.26981	0.301164	-0.0192612	0.936457	1.31319	0.714865	1.87088	1.92398	-1.45765	-3.2005	-1.17004	-2.18643	1.30992	1.06384	-3.11751	-2.17161	-1.94557	0.163152	0.238771	2.19648	1.25247
Runx1t1	ENSMUSG00000006586	0.635901	0.977095	0.178913	0.280397	0.758335	0.216286	0.802382	0.82343	0.999571	0.396499	-0.835443	0.12675	0.953849	0.891674	0.951871	-0.24363	0.844321	0.397385	-0.0737065	0.384009	1.78993	0.307597	0.233839	1.87875	0.540422	1.57708	-0.11113	0.928999	1.4364	0.948165	0.63126	0.599049	0.947601	0.196736	1.10407	1.36414	2.71975	2.4035	0.887466	0.113886
Aprt	ENSMUSG00000006589	0.783572	-1.82185	-0.719567	0.0837631	0.498847	0.0563115	0.467142	0.102667	0.727533	-1.91366	0.0544613	1.4753	0.0989231	0.999931	0.171623	0.527888	1.65066	1.24514	-1.90054	-2.65803	1.90666	1.8127	0.596103	0.531639	-2.4512	0.697851	-3.06798	-1.64823	-0.949405	-1.47635	0.808322	-1.93268	0.973364	-0.858095	-2.16358	0.671577	0.289591	-0.579957	1.41034	0.684353
Gtf2h1	ENSMUSG00000006599	0.303906	0.180156	0.530828	0.635391	0.921488	0.886657	0.975322	0.357683	0.999571	1.95594	-0.499286	-0.689297	0.335346	0.999931	0.700247	-0.0500625	1.53448	-3.51408	1.74391	-2.1433	1.56319	2.20935	0.271248	0.866505	-2.03806	-3.10638	2.08499	0.626687	1.56167	-0.00083475	2.41415	0.430234	0.864048	1.82792	-0.0959648	-0.615822	-0.728628	-0.236242	0.376665	0.409838
Hfe	ENSMUSG00000006611	-1.72935	-0.271489	-1.23397	2.36561e-05	0.00303087	0.739111	0.946667	0.0198586	0.346954	-0.149525	-0.900142	-1.69901	0.972444	0.960895	0.287913	1.61753	1.98282	0.8038	-0.528948	0.432721	-3.65774	0.567057	-1.83077	1.37834	1.82494	-0.691327	-0.3394	2.3714	1.41284	-0.781951	1.98968	0.904162	-1.07367	1.25733	0.0288265	0.204305	0.431956	-0.960859	-1.89785	1.10863
Abhd1	ENSMUSG00000006638	0.172726	0.159008	0.0790972	0.747176	0.951009	0.874156	0.972966	0.831607	0.999571	-0.499971	-0.915187	-0.378494	0.900041	0.999931	0.683392	-1.01215	-0.4254	-0.833236	-1.66365	-3.47819	-0.72903	0.521005	0.748969	-0.471345	-2.0367	-3.00475	-0.113677	-2.35172	-3.00875	-2.19967	-1.99144	0.182705	0.731796	-2.97677	-0.618312	-2.61334	-2.83265	-0.492629	-2.45741	-0.830925
Slc5a6	ENSMUSG00000006641	-0.067614	0.603582	0.17045	0.88942	0.977495	0.586064	0.913383	0.724245	0.999571	1.99677	1.97291	0.986733	0.0309091	0.507934	0.500072	-0.190163	-0.112222	-1.04464	0.126874	-0.092943	-0.514033	0.550313	0.673468	0.3099	0.389841	-0.124345	0.0204798	-1.17068	2.34887	0.531751	0.413579	0.651236	0.276594	-0.203502	0.736956	1.85007	1.11148	0.747032	0.596907	-0.556375
Nphs1	ENSMUSG00000006649	1.14467	0.83704	0.787584	0.0148244	0.202297	0.382983	0.865974	0.2667	0.960735	-0.60515	-0.249214	-0.690911	0.93977	0.999931	0.720691	2.0771	-3.04258	-0.0463781	-1.41223	-0.211956	1.65796	1.40458	-2.18899	0.632998	1.24344	-0.729128	2.16509	1.52019	-1.07824	-2.14147	1.12768	1.14448	1.95074	1.1573	-0.749499	0.47722	-0.495203	-0.947694	1.15022	-0.534135
Aplp1	ENSMUSG00000006651	0.662909	0.600142	0.352014	0.180006	0.670214	0.608394	0.917975	0.651059	0.999571	1.86689	0.157839	0.571576	0.284184	0.999931	0.755316	0.00615937	0.546922	0.846332	3.29907	2.3449	2.75837	0.864995	0.73229	1.03197	0.842457	1.97053	-0.0583444	1.39057	2.37234	1.70985	2.97367	1.56326	1.89274	1.48299	1.24909	1.01064	0.541024	2.50535	1.87549	1.89514
Qrich1	ENSMUSG00000006673	0.691769	-0.0708273	0.00755089	0.24933	0.733238	0.956822	0.988257	0.992828	0.999862	1.09653	0.323464	1.24704	0.833009	0.999931	0.376501	-0.878402	1.22	-0.166409	0.167236	0.46742	1.05852	1.7667	-2.03431	0.310669	0.800659	0.457219	-0.299911	-1.62555	1.01388	-0.957676	3.3341	0.679973	1.21837	1.46768	-0.409413	0.42018	0.863034	-3.21973	1.69749	-0.204811
P4htm	ENSMUSG00000006675	-0.763461	-0.798972	-0.202738	0.0761417	0.477687	0.491804	0.891497	0.657519	0.999571	0.422265	0.924826	0.839769	0.956152	0.957065	0.533091	-0.605216	-3.04468	0.89824	-1.15689	-0.160523	-3.15932	-2.77004	-2.85336	-2.8745	-0.914273	-3.15626	-0.526561	-2.68721	0.402178	-2.57114	0.651662	-2.8845	-0.678632	-3.10966	-0.860054	-0.707453	-3.19691	-0.648221	-0.121933	-0.96502
Usp19	ENSMUSG00000006676	0.289359	-0.818241	0.484446	0.569436	0.897246	0.43523	0.880593	0.312981	0.992298	0.0355042	0.0658857	-0.99764	0.994211	0.999931	0.228707	2.00909	2.43255	1.61701	1.65171	1.65896	1.8693	1.82239	1.56466	1.76797	2.54024	1.42384	2.08305	2.24946	1.74708	1.30783	1.61051	1.0636	1.68023	1.31004	1.91228	1.70274	1.64372	1.8563	1.93521	1.94444
Pola1	ENSMUSG00000006678	-1.28515	-1.46512	-1.453	0.0138772	0.195387	0.126628	0.687629	0.00132152	0.0674265	-1.01387	-0.0197675	-0.338898	0.527758	0.999931	0.759839	0.393233	1.70631	1.68142	0.210828	1.00759	-1.23123	0.56352	1.39007	0.940307	0.835121	-0.752386	-0.820678	-0.537466	1.13519	-0.349098	1.35355	1.06362	1.49793	1.28017	2.16896	0.406209	0.421241	1.93817	-0.6263	0.150211
Cdc42	ENSMUSG00000006699	-0.243938	-0.289614	0.0211567	0.267646	0.746821	0.58503	0.913383	0.921099	0.999571	-0.0688757	0.108339	-0.263944	0.979383	0.999931	0.446949	3.0148	2.7508	2.98585	2.78476	2.29146	2.67204	2.62129	2.02872	2.04587	3.03124	2.1957	2.9407	2.8821	2.31628	2.5212	3.16297	2.61707	2.19897	2.80277	2.31963	2.10572	2.51068	2.68731	2.86241	2.6072
Pknox1	ENSMUSG00000006705	-0.786142	1.17356	0.271559	0.160904	0.643362	0.189813	0.778524	0.760759	0.999571	1.39822	0.139979	-1.33847	0.581359	0.999931	0.453717	-0.643599	-3.29009	-0.0839323	1.08402	-1.43502	-0.897633	0.384598	0.0830242	-0.651033	0.381636	0.664079	-2.85312	-0.496	1.09331	-0.0129666	0.0990806	-0.314052	0.963957	1.12447	-1.31439	-0.69077	-0.730026	0.22371	-4.44899	-1.7428
Acot13	ENSMUSG00000006717	0.12915	0.817909	-0.26778	0.765016	0.952354	0.126893	0.687629	0.664684	0.999571	0.10809	-0.584238	-0.295965	0.982164	0.660964	0.860626	2.06827	1.90636	0.339568	0.877002	1.19491	1.56935	2.34437	1.00016	2.24531	2.58463	1.31328	0.130682	1.4977	1.72377	1.40407	-0.0344925	0.885665	2.22484	1.45562	2.37187	0.419318	1.68094	-0.0877948	1.09641	1.20741
Zfp184	ENSMUSG00000006720	-0.0590215	0.981636	0.0218175	0.897103	0.979883	0.292756	0.843063	0.960497	0.999571	-0.222682	-0.214617	0.888462	0.956375	0.999931	0.485507	-0.915209	-3.1815	-2.186	-2.41979	-2.22839	-0.8587	-1.91797	-2.7973	-1.66622	-2.91152	-0.403831	-3.06386	-4.51144	-3.45841	-0.733417	-0.112135	-1.65237	-2.42715	-3.35311	-2.30263	-1.63373	-2.11674	-2.79726	-1.3804	-1.06649
B4galnt1	ENSMUSG00000006731	0.344078	-1.37789	-0.00884901	0.497083	0.86912	0.231995	0.81847	0.988479	0.999589	-2.04942	0.0837122	0.923579	0.0387987	0.999931	0.609746	-0.0942468	1.58977	0.646413	-0.636968	0.593361	0.980854	-1.71735	-2.26175	0.514806	1.56682	0.749471	-0.0470402	-1.19669	-3.71917	-0.627169	-0.85177	1.11809	2.72082	1.53538	2.07994	0.400427	2.39656	2.04589	1.65211	-1.63785
Mettl1	ENSMUSG00000006732	-0.577588	0.757805	-0.201414	0.441102	0.842902	0.380867	0.865966	0.788363	0.999571	-0.843458	-0.140556	0.315373	0.900795	0.999931	0.388601	0.745243	-0.156693	0.150123	0.0902792	0.124132	0.177169	0.00879731	0.47482	0.300445	0.369193	-0.46224	-0.0212414	0.807411	-0.520093	0.101166	-1.2137	0.290799	0.168969	0.532486	0.380793	0.442783	0.0664891	0.794346	0.896681	0.42144
Tspan31	ENSMUSG00000006736	-1.07063	-0.395586	-0.210085	0.0105141	0.166308	0.734449	0.946287	0.7795	0.999571	-0.813649	-0.155244	1.40152	0.909976	0.999931	0.258405	1.97558	1.2477	0.112354	-2.01195	1.74915	-3.36887	-1.51673	-2.84391	0.573628	0.257069	0.694884	0.606247	-1.90936	-0.151789	1.20294	0.514557	1.04511	1.15719	0.433651	2.32207	0.425452	-0.0527939	1.14265	1.16006	1.73495
Kif5b	ENSMUSG00000006740	-0.227662	-0.376675	-0.175277	0.528342	0.883308	0.618517	0.919992	0.636965	0.999571	-0.0555999	2.01857	0.135228	0.984764	0.353525	0.895116	2.02826	1.45941	2.53965	1.88978	1.30255	1.50533	2.13348	2.39534	1.58324	1.31022	1.58486	1.65159	1.81447	2.15522	1.49867	1.98488	1.59548	1.98333	2.13597	1.60024	2.44132	2.22893	1.64675	2.01595	1.46097
Cnp	ENSMUSG00000006782	1.07895	-0.500059	1.16969	0.0295183	0.299629	0.696298	0.934913	0.0690189	0.640402	-1.02341	0.378834	-0.490123	0.820356	0.999931	0.665494	0.76497	1.0452	-0.57365	-1.02653	-2.36828	2.57547	3.01672	-2.87815	-0.252512	0.871485	1.71599	2.35361	1.48128	-1.02905	1.29258	0.900273	0.461034	1.76457	1.68353	-0.187028	0.0603823	0.967034	1.44157	1.37696	0.572513
Sulf2	ENSMUSG00000006800	0.879981	-0.753321	0.393386	0.0262989	0.284112	0.509327	0.895692	0.476615	0.999571	0.0509664	-0.505098	0.955987	0.991712	0.999931	0.59416	-3.16512	0.751187	1.71574	0.678656	-1.56974	1.64046	1.89167	0.800277	0.677539	0.685921	-0.54855	0.149486	-1.80435	0.906812	-1.40292	2.78053	1.08797	1.54267	0.812089	-0.410325	-2.46561	-0.811467	2.62372	1.40487	1.91377
Sod2	ENSMUSG00000006818	-0.0307294	0.156736	0.160066	0.920424	0.986135	0.791994	0.958728	0.612657	0.999571	-0.000427353	-0.624392	-1.00094	0.999708	0.991406	0.196372	2.60732	1.65137	2.02082	2.09957	1.02775	2.26262	2.17224	2.35589	2.25916	1.70409	2.36376	2.08952	2.26919	1.79696	2.32122	2.14576	1.97159	2.31289	2.19256	1.8487	1.82191	2.58264	1.80015	0.838627	2.1242
Tmco6	ENSMUSG00000006850	0.111899	2.36104	0.0845485	0.86364	0.97317	3.66196e-05	0.00200123	0.891542	0.999571	-0.0299547	-0.853106	0.139503	0.994901	0.999931	0.940289	-0.296669	-3.00214	-0.776897	-0.757167	0.19933	0.140472	-1.01265	0.094977	1.33183	-2.34083	-0.505662	0.147839	-0.459159	-0.562307	-0.187248	0.446349	0.230624	0.125822	1.50909	-0.0899945	0.248155	0.0687163	0.359676	0.0192623	-0.121576
Stambp	ENSMUSG00000006906	1.27948	0.723936	1.53355	0.0403657	0.345806	0.526234	0.898428	0.0229482	0.376661	1.10858	0.657152	0.0766832	0.633654	0.999931	0.970077	-0.673701	-1.36759	0.660124	0.548208	2.87604	0.708616	1.22916	3.26468	1.44343	1.83784	1.87445	0.503339	2.39864	1.72064	-1.40685	-0.0975357	0.549588	0.104965	1.82005	0.738274	1.06724	0.138858	-0.292074	2.52366	2.05869
Ezh1	ENSMUSG00000006920	0.411884	-0.358213	0.405966	0.465427	0.852828	0.659878	0.928018	0.417622	0.999571	-0.6359	-0.586087	-0.674004	0.883427	0.999931	0.446097	0.189037	2.04221	1.98144	1.56714	2.53858	1.88311	1.4457	2.77386	2.13649	1.71889	1.90645	2.06406	2.80061	1.60325	0.231727	0.490393	1.74236	2.15548	1.55308	1.62952	1.56618	1.37938	1.72109	2.12146	2.04585
Ctnnb1	ENSMUSG00000006932	-0.179413	-0.12448	0.132542	0.485478	0.864697	0.814988	0.961539	0.615771	0.999571	0.129488	-0.0165504	0.424519	0.960993	0.999931	0.360681	2.92297	1.87723	2.67495	2.81273	2.79449	2.66427	2.54383	3.30175	2.45961	2.19845	2.42451	2.65199	2.31596	2.81562	2.58232	2.27979	2.48219	3.21178	3.04025	3.44206	2.17539	2.70011	2.49652	3.49061	2.51279
Eif1b	ENSMUSG00000006941	0.310603	-1.32091	0.18688	0.540722	0.88844	0.258594	0.833395	0.767629	0.999571	0.888955	-0.0908564	1.96267	0.739713	0.999931	0.0650317	1.13868	2.60673	0.834839	0.825598	2.08849	1.88822	2.01243	-2.57463	0.967283	1.14922	1.68783	1.8799	-1.61973	1.88417	2.55133	4.11694	1.61444	1.31196	-0.101261	0.704137	1.21897	0.362423	0.963777	3.52728	0.117585
Chrd	ENSMUSG00000006958	1.33055	2.623	-0.17681	0.00915145	0.154766	3.1349e-08	4.88494e-06	0.662295	0.999571	0.0424821	-1.23646	1.58192	0.992158	0.276064	0.0706278	-0.514548	-3.17867	-0.874109	-0.863588	1.06093	1.39042	-0.247261	1.02811	1.63947	2.28274	-1.11855	-3.14806	-2.35188	-1.29257	-1.99524	0.763249	-0.367022	-1.20157	-0.695489	0.388198	0.403661	-1.22958	1.21622	0.59011	0.0139298
Psmd2	ENSMUSG00000006998	0.403964	-0.743732	0.334438	0.395186	0.820766	0.460713	0.887781	0.434981	0.999571	0.118207	0.674997	0.357523	0.974377	0.999931	0.649794	2.01487	1.7887	2.08323	1.96132	2.21226	2.24972	2.0627	2.59445	2.11735	1.69743	2.20024	2.03066	2.18014	2.26105	1.66427	2.25937	2.39763	2.19217	1.98022	2.06091	2.15323	2.11844	2.33028	2.3946	2.03881
Syngr3	ENSMUSG00000007021	0.807287	-1.92886	-0.757175	0.0396595	0.343071	0.00784074	0.137404	0.09384	0.704118	-0.247963	1.88876	1.5838	0.974377	0.266724	0.049496	-0.69933	1.6759	0.890992	0.65265	-2.24112	2.02935	0.9885	3.06564	-2.3318	-2.91071	-3.25152	-2.92878	-2.32786	0.155496	-2.30743	2.3479	-2.32254	0.727806	1.75166	0.652159	1.02317	0.887262	-0.340711	2.47827	0.0499056
Vars	ENSMUSG00000007029	0.471854	-0.0473268	0.274969	0.308902	0.775179	0.968869	0.991242	0.71674	0.999571	0.103682	-0.302447	-1.52004	0.989993	0.999931	0.338856	-0.568311	1.49233	0.286217	1.70001	0.211998	1.89775	2.34166	1.78277	0.574323	1.4801	1.70162	0.16225	1.4358	-0.237149	-1.48426	1.60657	0.830333	1.5913	-3.26912	0.299077	0.21774	-1.58416	0.00268173	-1.89805	0.50478
Abhd16a	ENSMUSG00000007036	-0.709677	0.34727	0.428378	0.376197	0.813702	0.733105	0.946267	0.573735	0.999571	0.0626146	-1.08668	-1.94696	0.992158	0.81429	0.0364498	0.622475	1.96028	0.833337	1.63304	-0.205416	0.680088	0.720987	2.70028	2.10344	0.725661	0.679257	2.03309	1.47717	1.22733	1.43154	0.448361	1.09462	0.684959	1.04409	0.817228	0.826592	2.21284	0.0835442	-1.26921	1.83461
Neu1	ENSMUSG00000007038	-0.625457	1.10065	-0.134459	0.399645	0.822251	0.0441376	0.408873	0.866076	0.999571	0.157614	-1.06464	0.59412	0.980458	0.572363	0.789555	0.873045	1.72008	1.46288	1.84753	2.56567	1.06412	0.791522	2.03628	2.68371	2.70886	0.548104	2.0694	-0.505651	1.35737	1.60745	1.51434	1.63925	0.70149	1.92709	1.1984	2.02264	1.52373	0.0573988	1.42185	1.61885
Ddah2	ENSMUSG00000007039	-0.687982	-0.825089	-0.264902	0.3822	0.815438	0.459302	0.887334	0.708687	0.999571	-0.556894	0.227332	-0.971554	0.918254	0.999931	0.520744	-0.37479	0.791895	1.51404	1.04606	1.06525	0.12062	0.821756	1.46969	0.498745	1.05745	0.313845	-0.0011052	1.36666	1.33884	-0.363719	0.879939	0.597125	0.00483113	0.443281	0.429836	0.21002	0.126643	0.899051	0.604887	0.80292
Clic1	ENSMUSG00000007041	-0.312287	-0.294283	-0.292154	0.507342	0.87501	0.640397	0.923052	0.449945	0.999571	-0.350738	-0.0704824	1.58284	0.93901	0.999931	0.125958	2.1076	2.137	1.88261	1.7384	1.36519	1.58372	1.84323	2.25719	1.94841	2.14697	2.07317	2.18047	1.43767	1.84969	1.58922	1.84011	1.99417	1.98429	1.88829	1.90502	1.89499	2.59185	1.49787	2.18929	1.93794
Lsm2	ENSMUSG00000007050	-0.936953	1.09327	-0.935848	0.0370588	0.332162	0.230763	0.818245	0.125113	0.777614	-0.653717	-2.55782	-1.56463	0.942554	0.0135445	0.321145	1.89838	0.68404	-0.529022	-2.48375	1.71622	-3.43276	-1.8885	0.836097	0.162909	0.413435	-1.23831	-3.04785	0.934582	0.356141	-2.19253	-2.3372	1.24508	0.991686	-0.672061	-0.513429	-2.76923	-1.6685	-2.78257	-2.48613	0.0819793
Pole	ENSMUSG00000007080	1.21316	1.25206	0.558293	0.0122976	0.183346	0.155229	0.732963	0.391942	0.999571	-0.236309	-0.516837	0.275747	0.964251	0.999931	0.860276	-0.665331	-3.08997	-1.14076	-1.85754	0.0105354	1.60083	-1.31999	-2.70421	-0.654385	0.708578	-0.221635	0.147812	-3.99825	-1.3086	0.479117	-2.42005	-0.939826	0.734188	-3.22093	0.131938	-0.876614	-0.0122117	-2.9955	0.0534439	-2.71997
Atp1a2	ENSMUSG00000007097	0.105849	-0.330763	0.130584	0.614706	0.913431	0.434787	0.880593	0.496582	0.999571	0.136521	0.748956	-0.0328867	0.946418	0.678286	0.95184	2.25527	2.66448	3.04305	2.57215	3.34982	2.96027	2.91369	3.28954	2.79484	2.45702	3.06471	2.84842	2.84148	3.26059	2.60889	3.61788	3.77015	2.97654	2.76123	3.26545	3.76241	3.09118	3.62641	3.00507	3.11307
Dennd2c	ENSMUSG00000007379	-0.478435	1.58052	-0.296593	0.54688	0.890198	0.0346795	0.35609	0.705627	0.999571	1.24686	-2.11008	-0.321692	0.755848	0.00821556	0.854467	2.59131	-0.823204	0.441483	1.478	1.31767	0.442274	-0.145493	1.41865	1.94437	1.36221	-0.235112	-0.192201	0.134611	2.22668	0.0452191	-0.133697	-2.09207	0.625729	-0.174589	0.297867	-2.18455	-0.107936	-2.2427	0.131543	-0.811716
Mark3	ENSMUSG00000007411	-0.320966	-0.370017	0.89522	0.628049	0.918832	0.763518	0.952582	0.187866	0.882412	0.502829	2.57723	-0.530543	0.942554	0.0874698	0.752763	0.275841	-0.124306	3.15444	0.795096	2.40137	-0.156773	2.08268	2.88164	0.41422	1.33283	1.88261	2.23751	1.04921	2.5249	0.869071	1.35118	1.42721	1.69418	1.8613	1.3532	3.37243	0.456914	2.25117	1.20112	1.13866
Gatad1	ENSMUSG00000007415	-0.423635	0.349265	-0.0387699	0.381521	0.815438	0.498616	0.892718	0.928068	0.999571	-0.127926	0.0751312	-0.277911	0.978395	0.999931	0.701011	2.66617	1.63285	1.6593	2.40784	2.73455	1.78406	1.3147	2.34764	2.13556	1.65012	1.96194	1.06577	1.87872	1.66576	2.22133	1.86815	2.15796	1.88529	1.93368	2.0814	2.29784	1.3937	2.24931	1.60202	2.1408
M6pr	ENSMUSG00000007458	-0.10853	-0.108348	-0.0973443	0.61436	0.913211	0.835635	0.966239	0.68352	0.999571	-0.29819	1.24601	0.0716608	0.923448	0.5478	0.949711	2.79335	2.35605	2.96313	2.59506	2.79187	2.8597	2.40987	3.12202	2.02392	3.273	2.89496	1.5292	2.48493	2.24699	2.44868	2.23925	3.3002	2.24957	2.95737	2.02987	3.30575	2.97662	2.26576	2.32722	2.73276
Lrrc8a	ENSMUSG00000007476	-0.536239	-1.18699	-0.837678	0.467047	0.853187	0.276486	0.84107	0.0988352	0.716322	-1.63694	0.597067	1.35656	0.0957673	0.999931	0.266383	1.83657	1.77114	1.51624	-0.370431	1.8513	0.0792338	1.43136	-2.41771	0.675793	1.39278	1.5264	-0.712535	-2.05378	-0.746244	2.35082	1.61348	0.937636	1.51957	1.41682	0.958625	1.3	-0.600734	1.39668	1.5351	0.241818
Ppp2r1a	ENSMUSG00000007564	0.722744	1.20301	0.643288	0.147919	0.62547	0.0643065	0.494345	0.298279	0.984259	0.194055	-0.596119	-0.151458	0.972444	0.951242	0.920868	0.0740661	2.18319	1.32134	1.17614	1.47299	2.28595	2.42102	2.64719	3.45701	1.63798	2.48333	1.64602	1.69396	2.1181	1.63764	1.396	1.79466	1.78512	2.30189	1.55442	2.73285	2.91932	2.43984	1.65186	1.53105
Fance	ENSMUSG00000007570	0.279057	-0.557537	0.355002	0.656073	0.928733	0.633556	0.921253	0.650731	0.999571	0.0492438	-0.19684	-0.776848	0.992725	0.999931	0.325652	-3.3631	1.5621	0.941586	1.74723	-2.07755	0.606837	3.13733	2.63921	0.696093	2.95568	0.621499	1.51641	-0.938514	1.1761	-0.418371	-0.796957	1.72054	2.53373	0.593781	-0.00218696	-1.80552	-0.40368	1.04851	-1.16793	1.27196
Tinf2	ENSMUSG00000007589	1.25162	-0.313639	0.823419	0.00557995	0.113279	0.630366	0.921059	0.129498	0.784255	1.18335	2.56955	-0.841655	0.741201	0.041687	0.364794	-3.34075	-0.405697	-2.55935	-0.434209	-2.30308	1.10348	0.805791	-2.45165	-2.40131	1.0677	0.118562	2.00421	-1.66439	0.676189	2.2753	-2.14184	0.753701	1.82886	1.00436	-0.458384	2.4424	0.540788	0.0353115	-1.87374	1.07922
Tgfbr1	ENSMUSG00000007613	-0.319375	0.142626	-0.131415	0.0746163	0.475573	0.363566	0.862993	0.420624	0.999571	-0.356069	-0.202184	0.225563	0.818771	0.999931	0.562551	3.01948	2.99123	3.22914	3.05228	3.36538	2.90456	2.89011	3.48329	3.35677	3.52633	2.73911	3.08322	2.76147	2.66916	2.76134	2.7608	3.545	2.80975	2.77391	3.26189	3.06622	3.08287	2.94743	3.30418	2.95612
Homer1	ENSMUSG00000007617	-0.362043	0.058909	-0.343098	0.621243	0.916407	0.950775	0.986803	0.634578	0.999571	0.0405891	1.70029	0.749903	0.993724	0.437377	0.42297	2.50042	0.964311	0.635805	0.711344	0.908863	0.904902	1.21459	0.654631	0.463349	2.29788	0.752862	0.134464	0.774188	1.45074	0.946493	0.64469	0.610051	1.17276	1.95007	0.938414	2.32443	1.50899	1.09583	2.01431	0.97204
Rad51c	ENSMUSG00000007646	-0.434835	2.4416	-0.532178	0.408261	0.826772	8.72785e-05	0.0041416	0.317329	0.993702	1.67265	-1.99703	1.10654	0.376767	0.257579	0.331209	0.460924	-0.794246	-0.798264	-0.653444	0.436356	-0.784875	-0.17687	1.41108	2.08814	1.44822	-0.744719	-3.04413	-2.65919	2.50344	0.901004	-1.4745	0.0731769	-1.35971	-0.322968	-0.212662	0.453298	0.862118	-0.0754468	0.752569	0.028886
Cav1	ENSMUSG00000007655	-0.456301	-1.05052	1.20334	0.266881	0.745745	0.167663	0.749933	0.106317	0.731909	0.908002	1.17904	-1.5581	0.875027	0.787433	0.209128	-0.69648	0.392764	0.28382	-0.0428412	0.395251	-1.19448	0.245426	-2.41926	-1.83456	-1.01587	1.08615	0.86721	2.50107	1.46417	-0.745231	2.0517	1.25176	2.26801	-0.974221	0.88663	0.893211	-1.15953	2.69655	-1.36715	0.302879
Arpp19	ENSMUSG00000007656	-0.379906	-0.227355	0.169686	0.307726	0.775145	0.667301	0.929461	0.458328	0.999571	0.249459	0.709772	-0.222502	0.918254	0.806992	0.760766	2.68779	2.68748	2.44537	2.79043	3.06024	2.28703	2.52821	3.23027	2.38979	2.77244	2.89315	2.73639	2.52115	2.84319	2.52194	3.29519	3.19368	2.40964	2.56525	3.15662	3.07184	2.83806	2.72397	2.49607	2.74218
Bcl2l1	ENSMUSG00000007659	0.792783	-0.303377	-0.385085	0.162245	0.645343	0.7977	0.959378	0.637122	0.999571	-0.476236	0.504915	-0.228851	0.952924	0.999931	0.9253	0.54861	-0.20764	1.44558	0.139668	2.0898	1.95708	-0.0167467	1.68606	0.522007	0.787357	0.151927	0.154237	0.809609	0.62037	0.605301	-1.06892	0.999135	0.907441	-0.221958	0.630083	0.850233	-0.170373	0.845399	0.584452	1.1757
Khsrp	ENSMUSG00000007670	0.262805	0.167023	-0.161276	0.606275	0.91029	0.783761	0.958586	0.781357	0.999571	-0.762194	-0.855131	0.446973	0.901136	0.824023	0.840618	1.73807	2.07897	1.47942	1.31879	0.958745	1.90943	1.75538	1.84505	1.98	2.56189	1.18758	2.48272	0.361726	0.719654	0.546127	1.57427	1.58633	2.23333	1.28057	1.18981	1.42523	1.58919	1.34153	1.74057	0.885216
Dio2	ENSMUSG00000007682	0.696337	0.696189	0.0280318	0.308877	0.775179	0.480366	0.889313	0.935627	0.999571	1.81636	-0.0529674	1.06254	0.0868055	0.999931	0.426192	-1.03344	-2.87987	-0.220244	-1.54094	1.65504	0.486978	-1.86684	-2.66905	0.0921169	-2.4638	-2.87469	-0.61181	-3.03247	2.07344	1.05819	1.07389	3.05319	1.05292	0.242802	0.0062803	0.0151068	-0.805351	1.43104	0.493213	-0.440131
Cct4	ENSMUSG00000007739	0.000815334	0.601273	-0.138006	0.998801	0.999732	0.276807	0.84107	0.818532	0.999571	-0.102925	-0.259927	0.342084	0.983308	0.999931	0.829965	2.1355	1.86826	1.15707	1.08797	1.16822	1.45187	2.05715	2.97453	3.05928	2.7089	1.56256	0.556358	1.39863	1.55192	1.73822	1.21332	1.61674	1.08743	1.42635	3.00989	1.04687	2.21468	2.94222	1.57876	2.44509
Cpt1c	ENSMUSG00000007783	0.884999	0.175257	-0.206824	0.209729	0.701184	0.865559	0.970894	0.523538	0.999571	0.271511	-0.215886	-0.193546	0.966227	0.999931	0.842043	-1.32625	-0.489185	-0.159896	-2.97127	-0.631939	0.0972206	-0.114122	-2.33641	0.321371	-1.79526	-3.27475	-3.27892	-1.59559	-0.56466	-1.20693	1.89368	-2.30059	-1.58577	0.0967117	-0.0944622	0.0310672	-0.832648	-0.0464279	-1.82125	-0.854304
Rhoa	ENSMUSG00000007815	-0.155973	0.92444	0.105262	0.76012	0.951095	0.107222	0.643278	0.842687	0.999571	0.106562	-0.599458	-0.314755	0.984764	0.819268	0.859406	1.87476	1.88895	1.54334	1.86965	1.8214	1.87501	1.77866	2.06177	2.26008	2.02455	1.85793	1.43008	1.84646	1.69218	1.69181	1.44286	1.71134	1.9007	2.02683	1.76476	1.94289	1.97987	1.65478	1.6607	1.7989
Zmiz1	ENSMUSG00000007817	-0.548965	0.658738	0.0697392	0.251094	0.735153	0.0624689	0.488359	0.832965	0.999571	-0.132516	-0.624369	-0.287698	0.974377	0.479281	0.776943	2.65629	1.2601	2.29603	2.21955	2.29873	1.89959	1.61703	2.35161	2.8603	2.82807	2.0783	1.93814	1.98775	1.72088	2.39343	1.66819	1.89196	1.87387	2.40117	2.34004	1.67406	2.16977	2.25909	1.73925	2.35559
Hnrnpa0	ENSMUSG00000007836	-0.290666	-0.0891713	0.0911852	0.416367	0.831116	0.839891	0.9666	0.704813	0.999571	-0.267743	-0.340066	-0.0178697	0.938893	0.999931	0.982876	2.57803	2.55405	2.62801	2.38613	2.56153	2.13278	2.25255	2.77758	2.77198	2.05543	2.79472	2.56503	2.27683	2.33293	2.5211	2.29848	2.76255	2.29705	2.26602	2.20426	2.28628	2.4998	2.37534	2.69199	2.48587
Hnrnph1	ENSMUSG00000007850	-0.589137	-0.214638	0.201252	0.302284	0.772925	0.612992	0.918684	0.33398	0.999571	0.0158367	-0.533497	-0.749512	0.994901	0.999931	0.00313892	2.9574	2.16277	2.42108	2.32215	0.813264	0.516775	2.64348	0.966225	1.72406	1.83792	2.23352	3.55354	4.09593	2.12436	1.70196	3.5254	1.54616	1.31685	2.34271	1.20246	1.46095	1.42306	2.8387	1.79764	2.50904
Id3	ENSMUSG00000007872	0.607633	-0.840575	0.65048	0.294753	0.768891	0.391958	0.866252	0.256986	0.952284	0.323296	1.41835	0.61745	0.943372	0.31481	0.115714	0.538249	1.72448	1.8637	1.39547	3.37212	1.84329	2.36774	2.4968	1.48638	1.71743	1.95887	2.78392	1.8637	2.86598	1.5956	1.53235	1.89078	3.14636	2.93961	3.39528	3.37364	1.46237	2.90904	3.50174	2.57618
Arid1a	ENSMUSG00000007880	0.32835	-0.460844	-0.366448	0.45442	0.848557	0.471334	0.888583	0.39274	0.999571	-0.439449	0.124511	-0.387563	0.900795	0.999931	0.702482	0.54116	2.23014	3.05229	1.24351	2.12355	2.15186	1.95045	2.64256	1.50097	2.56107	1.77908	2.21309	2.27789	1.9545	1.14891	1.96454	2.11949	0.96823	2.1949	1.91478	1.8436	2.69401	2.28473	2.28877	1.8296
Ctsd	ENSMUSG00000007891	-0.259262	0.0603659	-0.0214613	0.127528	0.59697	0.763734	0.952582	0.874959	0.999571	-0.408431	-0.154457	-0.430088	0.77863	0.999931	0.13268	3.29261	3.3221	3.2147	2.99086	3.31136	2.74727	3.02745	3.4496	3.4674	3.33233	2.9161	3.10254	3.22502	2.44871	2.80586	2.94284	3.7037	2.96888	3.14798	3.48855	3.10988	3.28351	2.89438	2.86239	3.01736
Rplp1	ENSMUSG00000007892	-0.279417	0.161822	0.119944	0.0358645	0.326403	0.296674	0.845931	0.187299	0.880808	-0.112439	-0.336633	-0.00690529	0.942554	0.940161	0.983012	3.62156	3.68105	3.5693	3.66081	3.52487	3.24347	3.5455	3.78381	3.88659	3.86499	3.79634	3.6891	3.28873	3.26073	3.16303	3.56274	3.87221	3.64942	3.54016	3.25835	3.54527	3.52605	3.47553	3.69063	3.44758
Abhd8	ENSMUSG00000007950	0.326969	-1.58083	-0.567813	0.652237	0.928728	0.0332414	0.349095	0.204449	0.910235	-0.0287592	0.848249	-0.228298	0.995607	0.999931	0.798283	-0.550932	1.60104	1.34323	0.9057	1.17199	0.912658	1.22648	1.35461	-0.956869	0.712527	-0.560517	-3.01102	-0.956839	0.334507	-0.959557	2.18496	-0.958311	0.45211	0.779385	1.48343	-0.953511	-0.621436	-0.65611	-0.961329	-0.957961
Ift22	ENSMUSG00000007987	0.635671	0.734336	0.580522	0.364763	0.80814	0.535773	0.90232	0.217694	0.927995	0.0648095	-0.17263	-0.175548	0.990148	0.999931	0.93411	1.01848	-0.11095	-2.47779	-0.388808	0.444114	0.972909	-0.361655	1.30739	0.624925	0.195746	-3.02309	0.754173	0.480911	-0.321129	-2.3354	-0.447589	-0.0975347	0.339866	0.0153129	2.19749	0.193148	1.03412	-3.0479	0.770408	-0.683686
Mid1ip1	ENSMUSG00000008035	0.236475	-1.44807	0.0739327	0.697131	0.940291	0.125162	0.684977	0.912757	0.999571	0.13659	-0.309447	-1.28396	0.981427	0.999931	0.390436	1.51128	1.96935	1.08609	-1.12988	-2.0434	0.81185	1.83933	2.50164	1.39784	-0.860331	0.898646	0.536061	2.5718	1.03661	-0.193496	1.76934	1.91476	-0.159124	0.868476	0.666516	-1.30141	3.08922	-0.44008	-0.782189	2.51312
Fgfrl1	ENSMUSG00000008090	0.94891	0.846116	0.0209791	0.0541986	0.405294	0.38222	0.865966	0.945557	0.999571	0.98444	-0.984408	0.830461	0.842639	0.999931	0.549487	-0.770661	-0.811879	-2.38493	0.236529	-1.73644	0.909782	-0.936171	-2.54162	1.05387	0.977377	-3.86066	-0.614456	-1.49736	-0.100847	-1.0169	1.40535	-2.27571	-1.15096	0.976994	-0.247802	-2.29372	-0.799349	1.7932	1.72433	0.112522
Fhl2	ENSMUSG00000008136	1.44689	1.92298	0.982496	0.00226759	0.0699132	0.00499925	0.099479	0.212707	0.920784	1.61232	-1.73026	0.282257	0.518976	0.25515	0.886901	-0.450733	0.0708351	0.61136	0.0878562	2.72122	2.5353	0.153869	0.307328	3.26585	0.124779	2.35246	-0.390176	1.38393	1.53559	0.902607	2.33699	1.16476	0.487318	0.308148	1.14595	0.973493	1.64224	1.9131	1.16748	1.32146
Emc10	ENSMUSG00000008140	0.407725	-0.0939132	0.715724	0.445345	0.845169	0.921983	0.980303	0.223976	0.92981	0.520698	-0.566165	0.784651	0.921804	0.999931	0.395548	1.55368	2.14721	1.31476	1.34582	0.508377	1.92632	1.90284	1.85997	2.12977	1.55579	1.55894	2.54966	2.08288	2.02248	0.520108	1.55976	1.70211	2.64877	1.98848	1.23535	1.58917	1.98189	2.53085	3.31657	2.99846
Clstn3	ENSMUSG00000008153	0.6891	-0.038911	-0.591218	0.254042	0.73746	0.97306	0.992027	0.344678	0.999571	1.50414	-1.05271	2.04914	0.581871	0.950924	0.000531352	-1.14279	1.29026	-2.59321	0.36723	0.0849346	1.5203	0.0238375	-2.46121	1.09367	-1.95715	-0.299621	-3.21043	-1.77842	1.59913	-1.37005	2.87108	0.32227	1.55472	-0.173038	-0.50224	-0.00181611	0.218925	-0.198459	2.51526	-0.615351
Fbxw9	ENSMUSG00000008167	0.277294	-1.02181	-0.911463	0.6376	0.922025	0.367648	0.863388	0.0327989	0.45872	-2.18716	-0.859057	-0.222281	0.0354073	0.999931	0.7929	-0.3986	0.984757	1.95127	-0.33525	-2.30688	0.510827	-1.42491	1.09834	0.168546	0.26506	-3.3796	-3.02811	-1.94023	-1.0647	-1.77013	-2.29628	-2.20238	0.758373	-0.961529	-0.0410439	-2.21947	1.05023	-0.152122	-1.99503	-2.19493
Fnbp4	ENSMUSG00000008200	-0.920476	-0.603711	-0.449406	0.202353	0.693306	0.465567	0.888383	0.381613	0.999571	-0.552293	0.278557	-0.424515	0.918254	0.999931	0.827477	0.875564	1.70208	3.12955	2.72055	2.00674	1.49233	1.06541	2.83432	1.41076	1.34881	1.6886	0.187838	1.64231	1.64743	1.33038	1.56321	1.11097	1.69284	2.26993	1.3543	1.06799	1.48068	1.99465	0.982899	1.44758
Cers4	ENSMUSG00000008206	0.450088	0.252878	0.00672327	0.374716	0.81334	0.816125	0.961539	0.993584	0.999862	0.692108	2.14363	0.090252	0.923641	0.389977	0.960721	0.141596	0.84755	0.697138	1.13445	0.0256731	1.73626	2.16491	0.892116	0.305565	1.2904	0.44164	0.0998197	1.1103	1.95574	1.22139	0.7657	0.906294	1.5898	1.54714	0.443605	2.76897	0.487827	2.51557	1.15979	2.13388
Scrn3	ENSMUSG00000008226	-0.0738036	1.93604	1.05439	0.926735	0.986788	0.0048981	0.0985533	0.0913477	0.699774	0.768954	-1.25877	-0.30194	0.926038	0.244454	0.851147	0.275516	0.347135	0.602318	1.19123	0.582675	1.14331	0.849721	1.71835	1.73042	2.19428	0.107384	1.91763	0.997008	0.679494	-0.473451	0.749309	1.10709	1.10944	0.718292	0.875294	0.937648	0.76784	1.22299	1.21166	1.52416
Phax	ENSMUSG00000008301	1.01892	-0.741546	-0.2466	0.011043	0.170693	0.458212	0.887334	0.528623	0.999571	-1.01415	-0.541931	2.50448	0.783299	0.999931	1.30424e-08	-2.83519	1.808	0.132938	-0.505168	-2.92198	2.21364	-0.255267	-3.2508	0.172288	-3.26415	1.37077	-2.896	-2.95795	-2.87235	0.622264	0.38891	-2.68027	0.0953212	0.02295	-2.56113	-2.69562	-0.313318	2.32506	2.81874	-0.77966
Tle1	ENSMUSG00000008305	0.356412	1.43271	0.770117	0.593108	0.906627	0.106683	0.642825	0.106135	0.731528	1.70843	0.356459	-2.28784	0.171695	0.999931	0.00186614	-0.647257	-2.81637	0.854539	1.88982	1.6223	1.74769	0.809316	1.40981	1.03888	1.3277	-0.303271	2.73033	1.54247	1.98014	2.00454	0.979216	1.08979	0.59416	2.50962	1.2272	1.22042	1.30377	-0.741819	-2.51668	-0.492021
Relt	ENSMUSG00000008318	0.924173	-1.21889	-0.0554277	0.131582	0.606182	0.109618	0.648215	0.892876	0.999571	0.72649	0.628891	0.0683947	0.909489	0.999931	0.966303	-0.50081	0.684132	0.290301	-0.0342963	1.88227	1.85487	-1.71229	-3.45429	-2.12481	-2.066	-2.79489	-0.268375	-2.58357	0.217866	1.84031	1.88902	-2.09355	-2.22771	-0.5355	-1.90159	0.183759	-1.51291	-2.79247	0.395716	-1.50295
Snrpb2	ENSMUSG00000008333	-0.17575	-0.339657	-0.0921078	0.699514	0.941422	0.69769	0.935473	0.860397	0.999571	-0.0771512	0.712662	-0.405021	0.983308	0.999931	0.788266	2.28906	1.78129	2.31054	1.65376	2.42875	1.90383	1.22203	1.0807	1.77846	2.97028	0.941582	2.03093	2.70828	2.27863	0.615589	2.72376	2.00963	1.50283	1.53596	1.64521	2.34632	2.05907	2.283	2.35694	1.79383
Ubc	ENSMUSG00000008348	-0.0647197	-0.505076	-0.131126	0.791004	0.957791	0.304554	0.846056	0.621182	0.999571	-0.14601	-0.0296637	-0.296769	0.950205	0.999931	0.679181	2.00956	3.1968	3.05439	2.60261	2.05946	2.71064	3.31241	3.07499	2.13796	2.85641	2.34679	2.11167	2.39247	3.35202	3.02183	2.44094	2.85698	2.15921	2.55448	2.38068	1.85242	2.63256	2.97226	2.20618	2.38849
Prpf31	ENSMUSG00000008373	0.545749	0.0658005	1.44778	0.362848	0.807586	0.96006	0.988597	0.0188395	0.339699	1.19065	2.16234	-1.0546	0.794454	0.353658	0.550122	1.20951	-0.660424	0.118053	0.0608925	-1.86191	1.68236	1.10748	0.825971	0.370149	0.758813	1.24878	2.62943	0.832323	1.96284	1.19129	0.383972	0.576523	1.30139	1.14767	-0.312411	2.92118	3.71773	0.301563	0.41941	0.102096
Sertad1	ENSMUSG00000008384	0.172077	-0.460889	0.34732	0.628293	0.918876	0.377527	0.865254	0.435711	0.999571	0.589569	1.59852	-1.24485	0.933983	0.47609	0.502107	-0.461578	-0.12836	-1.02861	0.991221	2.00036	-0.00706029	-1.04228	2.19734	-1.17244	-1.19314	-0.258931	-2.78806	1.23381	0.629593	2.0007	-1.37661	-1.13653	-1.52034	1.98456	1.37405	1.05796	-0.911061	0.72825	-1.57246	2.13645
Carhsp1	ENSMUSG00000008393	1.24734	-0.81873	0.490591	0.00599315	0.119142	0.394749	0.866357	0.530561	0.999571	0.0995446	0.0108261	0.191211	0.988647	0.999931	0.94222	-1.08681	1.98496	0.282473	-0.362098	1.30463	1.76986	1.44404	-2.54934	0.790371	-1.01299	0.8417	1.80373	-1.60126	0.775245	-1.25938	2.11504	1.33211	2.56843	-0.958581	-2.5613	0.951147	-0.937603	-3.02892	1.99736	-1.31344
Elk3	ENSMUSG00000008398	-1.5975	-0.0138263	-0.331814	0.00781401	0.140186	0.983995	0.995151	0.557608	0.999571	-0.802226	1.09407	-0.342721	0.884374	0.824023	0.799727	1.47922	2.14207	0.834778	1.34929	0.890753	0.330838	0.570317	0.941582	1.85668	1.29912	0.50521	1.89	1.28762	0.571003	1.60907	0.601655	1.21124	1.27035	2.50246	0.978664	3.16013	1.68734	1.92008	1.19912	2.21321
Herpud2	ENSMUSG00000008429	0.965432	0.570207	0.497454	0.114302	0.571558	0.599204	0.916188	0.48185	0.999571	-0.0414016	1.47227	-0.414079	0.991281	0.697186	0.73738	-0.983895	-0.381702	0.219597	0.323821	-0.529328	1.64615	0.0938054	0.659702	0.581837	-1.6657	0.986186	-0.580276	-1.81277	-2.85746	1.27962	2.02677	1.01531	0.458856	1.32408	0.347339	2.42161	0.911518	1.92632	-1.8866	-0.528999
Rdh13	ENSMUSG00000008435	0.791425	0.0902923	-0.134	0.182013	0.671829	0.942551	0.984712	0.82847	0.999571	-0.51363	0.0146128	1.03132	0.943372	0.999931	0.475598	-0.378517	0.33057	0.133339	0.0466801	0.201767	1.44549	0.134444	0.667365	0.509255	-0.564389	-0.433844	0.0122659	-0.939239	-0.6572	0.964116	-0.483462	0.524796	1.32404	0.892009	1.61789	0.244345	0.585589	1.1076	0.754951	0.439292
Fut1	ENSMUSG00000008461	-0.314042	-0.628753	0.0735094	0.486238	0.865383	0.566221	0.91108	0.920869	0.999571	-1.01011	-0.420993	0.233055	0.823758	0.999931	0.931219	-0.271232	1.42705	-2.94551	-3.13854	-3.11283	-3.13446	0.665097	-2.74683	-0.0368742	-1.77717	-0.742158	2.18966	-2.62129	-0.796379	1.47253	-1.70769	-2.89503	-1.68543	-3.06952	-0.283812	-0.358959	-2.08131	-0.753352	0.375613	1.86638
Arpc5	ENSMUSG00000008475	-0.690107	0.202857	0.159731	0.257239	0.738381	0.609594	0.917975	0.66514	0.999571	-0.0970824	-0.343828	-0.646642	0.978395	0.999931	0.669745	1.75919	1.82618	2.14118	2.38304	2.46606	0.878511	1.85983	2.30037	2.38677	3.00467	1.51659	2.75432	1.36346	2.13688	1.4484	1.53728	1.12809	2.18721	2.21286	2.66409	0.606015	1.74608	-0.0918119	1.42057	1.33755
Elavl2	ENSMUSG00000008489	0.90379	0.334895	0.101565	0.0619035	0.433576	0.779394	0.956251	0.807283	0.999571	1.49098	0.196931	0.808665	0.474462	0.999931	0.549032	-3.10523	-3.28558	1.60336	0.150942	1.64378	0.521693	-1.2112	0.182677	0.0643851	-0.0414835	-0.376877	0.139213	-2.15626	1.06271	-1.84076	1.75255	0.608337	0.834958	0.00990632	-0.560985	-0.836034	-1.03141	-0.420557	0.296353	0.285984
Pou2f2	ENSMUSG00000008496	-0.530925	-0.311956	-0.145055	0.237137	0.72512	0.579955	0.913383	0.67146	0.999571	-0.456688	0.887432	-0.467271	0.926038	0.790847	0.604563	2.21903	2.59581	2.4475	2.29215	2.02211	1.32137	2.16809	1.58505	1.35886	1.94244	1.46422	2.05094	1.75598	1.52664	2.32164	1.91646	1.57451	2.12138	2.15398	2.17137	2.32476	1.33029	1.48166	1.52668	2.02629
Mgst1	ENSMUSG00000008540	-0.134307	0.100416	0.392885	0.792694	0.957791	0.930911	0.982807	0.323535	0.993814	0.740557	-0.0439291	-1.199	0.903457	0.999931	0.455544	2.67524	0.306159	-0.0863193	2.35076	-0.453025	1.79915	0.621112	1.26406	0.268221	0.964991	-0.184159	2.46151	1.51357	2.22627	1.12034	0.808503	0.64102	0.733668	-2.80628	0.758725	0.713433	1.32158	-0.216409	0.366755	-0.436021
Nfib	ENSMUSG00000008575	0.528463	0.202806	-0.198607	0.360933	0.806729	0.829059	0.965989	0.810323	0.999571	1.22162	0.534398	0.635089	0.611496	0.999931	0.663159	0.498226	1.32281	0.703902	0.868617	2.19709	1.57262	2.02728	0.682674	1.00649	2.20466	0.467343	0.842351	0.77568	2.07774	0.964499	2.23333	1.27662	1.30762	1.61698	2.39294	1.92816	0.91966	1.16414	1.62137	1.29466
Ubqln4	ENSMUSG00000008604	0.518671	-1.2399	-0.346984	0.244566	0.730318	0.25717	0.833395	0.52531	0.999571	-2.29157	0.660416	-0.455811	0.0207933	0.999931	0.830992	-1.00099	1.09903	2.07667	0.611948	0.2575	1.11491	0.971642	0.371878	0.445404	1.30751	1.14289	0.367711	1.82677	-0.889038	-0.975482	-0.692535	-1.40888	1.96047	2.15294	0.0391905	0.642522	-0.0737282	2.2623	1.53885	0.771992
Rbfox1	ENSMUSG00000008658	0.969591	0.56998	0.570483	0.0457495	0.371071	0.631416	0.921059	0.494318	0.999571	1.52624	0.148445	1.07509	0.530397	0.999931	0.355071	-0.1116	-0.0433422	-0.444741	0.168383	0.13833	2.25997	1.36534	-3.05316	-0.320218	0.168151	2.45634	-2.96684	1.05092	2.36744	0.824207	1.70664	0.176726	1.26026	1.63841	-0.493588	-0.310331	1.00135	2.70198	3.60094	-0.203038
Rps18	ENSMUSG00000008668	0.0363594	-1.34535	0.212541	0.851819	0.97146	0.0571438	0.469615	0.320531	0.993814	0.0698098	1.45598	0.152273	0.977221	0.45098	0.789756	2.8223	3.2457	2.66244	2.83751	2.52809	3.01439	2.91631	2.952	2.56789	2.65168	2.92691	2.71802	2.797	2.95766	2.86738	2.83242	2.81006	2.76919	2.71308	2.68975	3.13608	3.10995	2.8784	3.12874	2.92757
Rpl10	ENSMUSG00000008682	-0.329154	0.807094	-0.476901	0.309917	0.775701	0.0368654	0.367981	0.187265	0.880808	0.154182	-0.969309	-0.335777	0.957281	0.332843	0.78602	2.8616	1.8854	-0.229192	1.90687	1.65344	1.54726	1.61161	-2.27447	2.45622	2.72322	1.65939	0.620533	2.41764	2.20411	2.24231	2.75873	1.82681	2.61715	1.15595	2.37008	0.299716	1.33848	1.30056	0.522662	1.55129
Rps15a	ENSMUSG00000008683	0.0533063	-0.362499	0.309036	0.809837	0.963749	0.54341	0.903676	0.204845	0.910292	-0.359223	0.669999	0.151121	0.926822	0.999931	0.856276	1.99948	1.35854	2.0845	2.51279	1.17791	2.97137	2.07617	1.75601	1.88199	1.81846	3.29725	2.04705	2.05387	1.94411	2.39591	2.01983	1.77505	2.61254	2.79226	1.38351	3.25024	3.32955	2.75415	3.67226	2.07453
Ncaph2	ENSMUSG00000008690	-0.895772	0.142739	0.345313	0.0755795	0.477153	0.904152	0.977859	0.601654	0.999571	0.458077	0.512931	-0.160236	0.953338	0.999931	0.953086	0.655839	0.760746	-1.57281	0.236134	-0.924524	-2.54688	-0.0958694	-3.08573	1.00423	-0.218991	0.186781	2.39496	-1.88866	0.764936	1.68997	-0.298994	-1.60213	0.733152	2.3088	-1.20861	1.43266	0.721182	-0.890265	1.25591	-1.71426
Hipk1	ENSMUSG00000008730	0.0194404	-0.319762	-0.877755	0.954001	0.991499	0.528526	0.898464	0.000326486	0.0272246	-0.642304	-0.0581885	2.26758	0.756555	0.999931	0.0184508	1.86827	2.23335	2.6638	1.76049	2.31833	2.16884	2.33551	3.01387	1.92454	2.87061	2.44306	2.02521	0.481438	1.8033	2.14508	1.65658	2.38961	1.7291	2.14552	1.98702	1.55947	2.27265	0.517994	2.86487	2.67363
Gprc5b	ENSMUSG00000008734	0.72238	-0.595162	0.276405	0.26176	0.740701	0.325785	0.849251	0.607128	0.999571	0.986175	2.18445	-1.21271	0.749821	0.151085	0.527791	-3.48818	0.23271	-0.160814	-0.688305	1.74208	-0.53973	-0.327504	-2.27451	-2.25866	-0.959415	-1.35472	-0.80364	2.1651	1.86469	-1.22531	-0.816567	1.35023	2.24909	-0.0965693	0.357292	2.27316	-2.32271	1.8551	-1.84191	1.13231
Man1a2	ENSMUSG00000008763	0.607831	-1.14812	-0.517896	0.27578	0.753756	0.318668	0.848825	0.54903	0.999571	-0.175772	0.750204	1.18713	0.982164	0.999931	0.513694	2.0287	2.25622	1.7586	1.29204	0.834352	2.32349	1.38298	2.46169	1.26026	1.12431	-0.582446	1.39017	-0.963494	1.91264	2.25385	0.945037	2.32935	2.44072	2.54489	1.81545	1.44151	2.11142	2.33798	2.25281	1.065
Acyp1	ENSMUSG00000008822	-0.290869	-0.749449	-0.397067	0.555451	0.893417	0.533059	0.900665	0.621989	0.999571	0.0024941	0.152738	-0.0368593	0.999667	0.999931	0.988053	1.97221	-2.88552	2.54598	1.23635	1.53626	1.88345	-1.19835	1.62061	0.232338	-1.57114	0.602511	-0.359565	1.82611	0.694939	-1.75601	1.76011	0.770525	1.75629	-2.98993	0.214555	0.422737	-0.602624	0.178393	1.20813	1.58471
Hdac5	ENSMUSG00000008855	-1.35581	-0.692259	0.373818	0.00968852	0.159598	0.565368	0.91108	0.608064	0.999571	0.712773	0.589163	-0.784684	0.923641	0.999931	0.677648	-0.2147	1.77327	-0.373307	1.36624	0.490029	-1.01152	0.486811	1.1808	-0.206926	0.640309	-0.637815	2.36461	1.13418	1.11156	-2.10776	1.00139	2.7667	1.00229	0.57635	-0.187287	0.150293	0.276095	-2.93018	0.738482	1.36579
Rala	ENSMUSG00000008859	-0.0811955	-0.778683	-0.477994	0.788045	0.957791	0.243483	0.825556	0.14594	0.806841	-0.483624	-0.0560558	-0.195194	0.810449	0.999931	0.899403	2.1422	2.55872	2.69462	1.7964	2.80069	2.18052	2.41679	2.35006	1.56283	1.9838	1.8704	1.96757	1.74437	2.15857	2.13496	2.09437	1.86283	2.39436	1.67123	3.02959	1.44657	1.55889	0.676657	2.00351	2.72311
Vdac3	ENSMUSG00000008892	-0.145226	0.452234	-0.671876	0.854387	0.971571	0.650974	0.925913	0.372235	0.999571	0.433663	-1.66485	-1.19076	0.949587	0.514689	0.560687	0.507039	0.833036	0.991894	-0.560266	-2.27863	0.441623	0.57829	-2.55347	0.887631	-1.4225	0.569333	-3.16435	1.48823	1.60363	1.87203	-1.1731	1.48953	2.92468	1.87142	-0.6052	-3.13806	1.2374	1.73336	-2.65114	0.360492
Vps72	ENSMUSG00000008958	-0.559153	0.068739	-0.108109	0.458376	0.849946	0.9552	0.988016	0.902733	0.999571	-0.107742	-0.239057	0.870491	0.989993	0.999931	0.649984	2.04626	0.827708	0.566949	1.35428	1.6302	0.229266	0.892713	3.14628	1.22294	1.17146	0.404122	0.871845	-0.998552	0.257048	-1.01017	1.06572	2.17648	2.38822	-0.108689	1.28744	0.966483	-0.652194	0.141761	1.30602	0.976617
Bmp7	ENSMUSG00000008999	0.835784	-0.430097	-0.375625	0.135846	0.610072	0.727064	0.944462	0.428511	0.999571	-0.678041	-0.119405	0.64599	0.93977	0.999931	0.65489	-0.571496	0.524931	-0.247715	-1.45083	-1.02449	1.48794	-1.38928	-2.30676	0.11242	-1.64921	-3.12597	-0.758561	-1.86136	0.0895664	-1.50622	-1.51835	0.307105	1.57703	-3.04161	-2.67127	2.25515	-0.712209	-0.0221497	0.725283	-0.622879
Dynll1	ENSMUSG00000009013	-0.106022	0.306645	0.160756	0.733945	0.949344	0.581106	0.913383	0.615395	0.999571	0.535003	-0.44881	0.75157	0.788678	0.999931	0.321057	2.70532	2.48506	1.89389	2.47491	2.64741	2.33131	2.72942	1.23193	2.53246	1.98234	2.43208	2.33453	1.87635	3.30678	2.74074	2.89849	2.23892	3.12762	2.47241	2.54815	1.98631	2.05396	2.07092	3.4319	2.13635
Pdcl	ENSMUSG00000009030	-0.601407	-1.31679	-1.25216	0.28201	0.760109	0.160921	0.739862	0.00875338	0.223308	-1.48626	-0.911386	-1.07403	0.435572	0.999931	0.616761	1.89808	1.821	1.37266	-0.507139	1.29705	-0.0417813	0.108345	0.999838	1.36497	-1.15867	-0.050244	-3.2793	2.8428	-0.424705	-0.882084	1.61655	-1.47295	-1.53254	-2.7367	1.63442	-1.39324	-1.20012	0.575184	-1.24201	1.65837
Tmem184b	ENSMUSG00000009035	0.395078	-1.23656	0.717641	0.558361	0.893867	0.170023	0.752593	0.296658	0.982756	0.910951	0.669946	-0.610366	0.870486	0.999931	0.448041	1.72615	-0.0488803	1.16221	0.977058	-0.135375	0.554603	1.80069	1.3676	0.131045	1.41415	1.73251	1.21908	0.63717	2.08146	0.938515	1.25864	1.54815	2.43257	0.961556	1.15251	0.127373	0.655773	1.31966	0.468831	1.77136
Nf2	ENSMUSG00000009073	0.368142	0.21472	0.127586	0.579459	0.901842	0.814038	0.961539	0.861164	0.999571	0.680484	-0.364985	0.0325523	0.918254	0.999931	0.979814	1.42152	1.06847	1.0387	0.676698	2.31406	1.80449	0.861217	0.742201	1.29834	0.852956	1.85874	0.800582	1.11329	0.638345	1.26781	1.97904	1.88984	0.760379	0.506303	1.36831	1.08227	0.949858	1.4891	1.4168	0.817981
Ewsr1	ENSMUSG00000009079	-0.405734	-0.418384	-0.293741	0.195707	0.68972	0.32612	0.849444	0.168372	0.844284	-0.162589	0.452925	0.133709	0.93977	0.999931	0.885479	3.1061	2.80358	3.87439	2.91446	3.0319	2.44931	1.77091	3.05444	2.65791	1.96833	2.8852	0.97914	2.58233	2.77393	2.53281	3.30341	2.33693	2.34417	2.77775	2.16865	2.94124	3.00165	2.80487	2.42125	3.00905
Ap1b1	ENSMUSG00000009090	0.176234	-0.734493	0.0742361	0.780787	0.955151	0.521542	0.898027	0.916062	0.999571	-0.468991	-0.0744559	1.10115	0.950205	0.999931	0.521782	2.06585	1.3732	0.985415	0.728977	0.82418	1.32625	1.04323	1.38927	1.20217	1.61181	0.930809	1.94093	0.327417	0.410785	0.613644	1.6879	1.25221	1.45406	1.41575	1.57588	1.19568	1.68372	0.403127	1.86918	1.74796
Derl3	ENSMUSG00000009092	-0.15032	-1.10813	0.0580404	0.822013	0.965638	0.305097	0.846056	0.904498	0.999571	-1.55717	-0.445932	-1.09639	0.556466	0.999931	0.541688	0.986805	1.36665	2.20648	0.572174	2.3342	0.555798	1.38298	-2.21496	0.517918	2.32175	1.23024	1.86161	2.30012	-0.0095956	-0.932542	-0.49559	0.75974	3.19862	1.59116	0.0716308	-2.39474	-1.08697	-3.17343	1.67091	0.765288
Ccl8	ENSMUSG00000009185	-1.47303	-1.25538	-0.150901	0.0394964	0.342529	0.249841	0.828883	0.763902	0.999571	0.168477	-0.0497086	-0.33845	0.972444	0.999931	0.856592	2.07648	1.79664	0.537118	1.78102	0.128023	-0.115301	0.762081	1.07036	0.595449	1.92205	1.64001	0.600987	2.34388	1.64945	-0.444601	1.79674	1.00682	-0.0610081	-0.242893	0.246662	0.496501	1.67818	-0.398024	1.81605	2.00153
Lnpk	ENSMUSG00000009207	-0.0904041	-0.590993	-0.259696	0.896453	0.979864	0.612342	0.918566	0.665815	0.999571	0.864821	1.11108	2.44427	0.898601	0.892245	1.14933e-07	-0.783374	-3.09824	1.67835	-0.648129	0.381001	0.042436	-0.536756	-2.78146	-3.21557	1.17264	0.905052	-3.08035	-2.90664	1.00322	0.809811	-1.58506	-0.392264	1.4859	-0.669675	-0.513479	-0.502594	-1.42321	2.56781	1.93576	-1.75081
Fam163b	ENSMUSG00000009216	0.376159	-0.493179	0.363325	0.587531	0.905296	0.68642	0.93387	0.589163	0.999571	0.70797	-1.28063	1.37104	0.926038	0.830626	0.218801	-0.635997	0.636327	0.51869	-0.726798	-0.35054	0.780446	-0.845036	-2.54136	0.860463	-1.91261	1.9841	-0.357856	-1.96154	1.52452	2.1049	1.10223	1.13016	1.03762	-3.00923	0.886772	-2.35113	1.48496	1.99297	1.81626	-0.419073
Pttg1ip	ENSMUSG00000009291	-0.107031	-0.632734	0.0774011	0.779149	0.954869	0.523592	0.898356	0.867696	0.999571	-0.0215203	0.960005	-0.109106	0.995339	0.999931	0.945704	2.00395	1.73267	0.0163102	0.894669	-2.61318	1.80365	2.4949	-2.63481	-0.114367	0.693893	1.60273	1.32258	1.06736	1.74209	2.37383	0.658943	0.138939	2.98653	1.85308	-0.929348	1.28787	2.00187	0.313325	1.33686	1.09172
Trpm2	ENSMUSG00000009292	0.139757	0.348327	-0.0297197	0.810449	0.963767	0.517482	0.897438	0.949389	0.999571	-0.565528	-0.632674	-0.328432	0.926038	0.731809	0.795973	0.909176	1.89614	1.84967	1.07682	2.80606	1.55131	1.32128	2.5649	2.61023	1.29069	2.1548	0.0645412	2.11376	1.24496	1.42299	1.19338	1.04867	1.34688	1.68168	3.16769	0.952357	1.6565	1.67851	1.38379	2.67341
Ube2g2	ENSMUSG00000009293	0.371485	-1.17896	0.538782	0.339629	0.79685	0.311593	0.848183	0.33434	0.999571	0.29409	-0.0108022	0.555389	0.953849	0.999931	0.732582	1.76419	2.49993	1.25718	1.58381	0.519685	2.24906	2.19391	0.93031	1.68976	1.73343	2.0123	2.29784	0.412798	2.0151	3.0312	1.75534	1.96183	2.43537	1.66854	2.04027	1.40533	2.48756	1.86447	2.34405	2.39162
Met	ENSMUSG00000009376	-0.874185	2.43854	-0.699696	0.0753375	0.477153	3.22345e-05	0.00182204	0.266259	0.960449	-0.637731	-2.44037	-0.228298	0.906866	0.025942	0.798283	1.46834	-3.0459	-1.23615	-2.02095	0.476615	-3.55262	-1.91079	2.04665	1.85304	1.41603	-0.944432	-3.39568	-2.35487	-3.47927	-1.76739	-1.45322	-0.452498	-1.33065	-0.790693	-1.04924	-0.735423	-0.738155	-1.15726	-2.68383	-0.741446
Syn2	ENSMUSG00000009394	0.957626	0.546966	0.511972	0.0668607	0.448068	0.607213	0.917784	0.502907	0.999571	0.635424	-0.542927	0.638194	0.921109	0.999931	0.72657	-0.255807	1.57282	0.18722	0.362182	0.182098	1.55463	1.90122	1.79588	1.73805	2.50621	1.94962	-0.49621	1.91832	2.12821	-0.996925	-0.631582	1.33776	2.2012	-0.00641627	1.00324	1.12449	1.73358	2.49826	2.26159	1.24227
Nav1	ENSMUSG00000009418	0.497798	0.743794	-0.700571	0.395594	0.821249	0.293655	0.843063	0.328489	0.997295	0.771641	-1.168	1.61777	0.909976	0.743009	0.0664176	0.0134365	-0.357589	2.33521	1.05925	1.43337	1.81041	0.740812	2.82011	2.21516	-0.886091	0.616224	-0.588224	-1.46644	1.2192	1.53466	2.246	0.832746	1.08528	2.08199	1.0951	0.744209	0.881771	1.36165	1.24183	2.01243
Tnpo1	ENSMUSG00000009470	-0.240518	1.22115	-0.623689	0.709598	0.943125	0.0761056	0.546434	0.436878	0.999571	-0.578856	-1.45509	1.94487	0.926038	0.35956	0.0192235	0.940055	2.24446	0.868285	1.792	2.41462	1.16869	1.90289	2.31547	2.58211	1.02661	0.861606	0.458315	-1.48749	-0.0642997	1.19856	2.37882	1.16561	0.747821	2.13336	1.09873	0.965758	-0.271305	-0.710962	1.9896	1.86287
Otog	ENSMUSG00000009487	-0.73685	-1.00497	0.347429	0.123224	0.588841	0.306572	0.846056	0.668585	0.999571	-0.727485	1.17139	-0.577855	0.909596	0.895558	0.579338	1.12445	-3.19784	0.390717	-2.27721	0.947208	-1.49027	-1.6035	0.645884	-2.2891	1.33611	-0.108843	0.77359	-1.675	-1.45502	-1.28778	-1.43505	0.604648	-1.08687	-3.43448	0.616883	0.148917	-1.09619	-2.88274	-1.84392	0.0143102
Rnmt	ENSMUSG00000009535	-0.0740796	-0.162647	0.31822	0.853617	0.97146	0.872745	0.972966	0.49018	0.999571	0.487975	0.54731	-0.376819	0.93901	0.999931	0.748358	1.23369	0.828547	1.83501	2.81906	0.167813	2.211	2.14575	3.2334	1.24589	1.73262	1.76525	2.00476	2.28037	1.85692	1.48868	1.67151	1.0511	1.38827	1.61425	1.54434	1.5422	2.17484	2.46799	1.80108	1.73037
Srp14	ENSMUSG00000009549	-0.199328	0.413146	0.154746	0.46509	0.852828	0.371915	0.863446	0.562921	0.999571	0.463152	-0.770639	0.384664	0.833305	0.718119	0.515342	2.62845	2.75281	2.51609	2.89943	2.96088	2.70804	2.65028	2.98758	3.06867	2.37638	2.66208	2.59503	2.48221	2.87209	2.32283	2.95577	2.61672	2.90885	2.66119	2.67818	2.45437	2.44633	2.53715	3.08899	2.65346
Cdk9	ENSMUSG00000009555	-0.00314641	1.1092	0.259393	0.993689	0.998327	0.0586215	0.477039	0.624998	0.999571	0.0807603	-0.521435	1.92152	0.987025	0.922762	0.0155179	2.06416	1.20319	1.68343	2.0994	2.282	2.10397	2.21933	3.38441	2.4922	2.90274	2.35302	1.74906	0.992212	1.42848	1.09032	1.71173	1.81408	2.15758	1.73721	2.02046	2.20647	1.47767	1.77736	2.43243	1.88369
Tor2a	ENSMUSG00000009563	-0.134208	-2.10863	-1.22707	0.845211	0.970505	0.00275473	0.0643012	0.0102072	0.238817	-0.318842	1.72594	1.07395	0.957281	0.486257	0.45719	0.471977	1.68942	0.310464	-1.31957	-2.38811	0.0555022	0.476442	-1.816	-2.57959	-1.01109	-1.95163	-0.133162	-1.16082	0.208886	-0.291421	-0.529079	0.961898	2.40645	1.04473	0.114758	0.862526	0.739098	-1.06331	1.34614	2.29851
Fpgs	ENSMUSG00000009566	0.155936	0.330309	0.207207	0.789495	0.957791	0.743159	0.948239	0.719777	0.999571	1.04691	0.589494	-0.383715	0.848135	0.999931	0.735186	-1.11331	-0.514015	-0.446663	-0.0673474	0.576085	-0.412494	0.156746	0.770967	-0.0682097	-1.25455	-0.078509	-0.672548	-1.76069	0.741288	1.16364	0.83974	0.504317	-1.18912	-0.0528704	-0.11398	0.369441	-0.127635	-3.24321	-1.89621	0.940321
Mkl2	ENSMUSG00000009569	0.837183	1.26213	0.167107	0.13995	0.618707	0.106092	0.641479	0.846802	0.999571	0.91829	-0.43335	1.15083	0.875124	0.999931	0.520183	0.136355	0.0654304	1.0092	0.845523	0.902917	2.19474	1.22146	0.852958	1.99872	1.50427	-0.183801	1.41855	-1.32403	1.82599	1.92024	1.32129	1.19879	1.87597	1.99943	1.17186	1.57943	1.25006	2.48207	1.44964	0.65255
Cbx5	ENSMUSG00000009575	-0.0468916	0.213661	-0.889928	0.876635	0.974886	0.551614	0.906658	0.131756	0.788574	-0.0138473	0.0330902	0.0508568	0.995319	0.999931	0.975307	1.66557	2.07711	2.32953	2.2186	2.38488	2.30885	2.32686	2.93385	2.17061	1.66858	0.119366	0.965867	1.49292	2.44854	1.13902	2.92806	0.922435	1.87633	2.04505	2.19179	3.3424	1.56231	1.41657	0.895583	1.20226
Apobec3	ENSMUSG00000009585	-0.625902	-0.316759	0.188744	0.189021	0.683905	0.647823	0.92505	0.436759	0.999571	-0.166121	0.029646	-0.915315	0.971265	0.999931	0.049496	2.03644	2.23464	2.50865	2.64235	2.8577	1.79293	1.83595	1.66193	1.78166	2.59802	2.16263	2.69978	3.26037	1.38558	1.8942	2.59644	1.70713	1.85348	2.55844	2.82713	1.62228	1.7519	2.4078	1.80414	1.79784
St6galnac1	ENSMUSG00000009588	-0.408495	1.22994	-0.18247	0.408331	0.826772	0.194519	0.785637	0.730409	0.999571	-0.29206	-0.667124	0.819933	0.956375	0.999931	0.532799	0.0374818	-3.06201	-0.669127	-1.04645	-0.0838006	-0.612379	-2.66672	-2.81851	-0.40682	0.066116	-0.834242	-0.527429	-2.59618	-0.883845	0.523431	-2.37971	-0.125357	0.542687	-0.805146	-0.825631	-0.53866	-0.461085	-0.624756	-0.00214254	-0.713823
Vav2	ENSMUSG00000009621	-0.314173	-0.533304	-1.65815	0.558546	0.893867	0.5349	0.901815	3.88859e-05	0.00565849	-2.42173	0.14419	1.09122	9.14225e-05	0.999931	0.439972	1.31704	1.91065	1.82594	0.634581	0.29673	1.09815	1.31401	1.43168	0.668709	2.73353	-0.641701	-0.679782	-0.615832	-1.1606	-0.209401	0.270881	0.830019	0.499291	1.2622	0.294633	0.873104	0.0187729	1.88809	1.49172	0.577332
Mcu	ENSMUSG00000009647	0.218176	0.433005	-0.409616	0.771509	0.952909	0.68508	0.933121	0.623467	0.999571	0.639937	-0.295945	1.02984	0.93977	0.999931	0.533091	0.173036	0.681871	0.656302	0.530489	0.609169	1.02582	0.50285	0.367389	0.852922	0.576694	0.775805	-0.0166487	-0.775368	1.19205	1.13299	1.14101	0.829218	0.747116	-0.318007	0.93586	1.03527	1.21521	0.994353	0.803647	0.240513
Fxyd5	ENSMUSG00000009687	-0.128632	0.909836	0.292359	0.866605	0.973769	0.174398	0.759186	0.608174	0.999571	0.320552	-1.47077	0.125138	0.950205	0.362671	0.949128	2.4108	2.00834	1.05038	0.313566	2.04209	1.1013	1.57814	0.799315	2.8097	1.44513	2.57308	0.241132	2.42907	2.74106	2.23176	1.1159	2.01372	1.13671	0.899301	1.7403	1.3804	2.20416	2.30904	1.70918	1.84381
Kcnd1	ENSMUSG00000009731	-0.485201	-0.29573	-0.356478	0.141117	0.620841	0.749748	0.949203	0.376187	0.999571	-0.245197	0.448065	-0.187657	0.974276	0.999931	0.852341	-3.57133	1.26292	-2.77375	-1.40106	0.0930067	-1.39044	-2.88866	-2.12205	-0.113302	-1.37757	-3.56413	-3.35807	-1.5744	-0.134656	-0.996795	-1.08611	0.0795299	-0.884727	0.176943	1.10563	0.887656	0.53097	0.656592	-1.88335	-0.234077
Tfcp2	ENSMUSG00000009733	-1.16505	1.21624	-0.370909	0.00504806	0.107795	0.251265	0.830619	0.534147	0.999571	0.697066	-0.239292	-0.244049	0.92636	0.999931	0.827014	-0.512131	-0.382673	-0.750226	-0.064457	-0.590123	-3.05682	-1.98366	-2.40388	-0.427552	-0.0541857	-0.614599	-3.26467	-2.41072	0.361192	0.792038	-2.59522	-2.93174	-0.0477378	-2.94236	-0.272119	-0.150396	-1.71755	-1.12752	-2.60002	-0.183358
Pou6f1	ENSMUSG00000009739	0.491571	-0.114879	-0.940243	0.417071	0.831116	0.929318	0.982418	0.0745635	0.661735	1.13232	0.379488	1.50529	0.846435	0.999931	0.139054	1.36693	-0.339299	0.778578	-0.339028	-2.21183	1.42814	0.892539	1.51476	0.347179	-0.628078	-0.780551	-2.85037	-3.3846	0.702827	1.37355	1.97843	0.573607	0.0929125	1.8398	0.301199	0.225291	2.2384	2.50085	0.844316	-0.545936
Ubp1	ENSMUSG00000009741	-0.29218	0.217596	0.0444907	0.572896	0.899133	0.465978	0.888383	0.879192	0.999571	0.0036533	-0.599026	-0.294172	0.998724	0.790847	0.69477	2.63223	1.96971	2.1572	1.67016	1.72594	1.15313	2.72074	1.34311	2.6171	2.86418	2.4224	2.40987	1.75553	2.43689	2.32142	2.11349	1.95709	2.0593	1.62488	1.84863	1.48069	1.69864	2.12511	1.7372	1.56803
Nuak2	ENSMUSG00000009772	-0.586461	2.20824	0.130547	0.256547	0.73746	0.000401486	0.0137375	0.842328	0.999571	0.936403	-1.4614	-0.304817	0.89041	0.531702	0.888464	-0.00553292	-0.232	-0.313949	0.408045	0.552765	-0.713715	-0.0684634	0.796165	1.28043	0.359052	-0.644835	0.147359	0.369713	0.678217	0.543374	0.652369	1.93951	-1.17381	1.63765	-0.0168762	0.125051	0.488393	0.462713	0.0226952	1.13899
Ick	ENSMUSG00000009828	0.411727	-0.655929	0.288146	0.371578	0.810889	0.427646	0.878762	0.6279	0.999571	-0.406669	-0.163116	-0.806637	0.949901	0.999931	0.666407	-0.412159	0.98838	1.55735	0.496719	0.0870151	1.1156	2.31946	-2.12487	0.155423	3.51649	1.39452	1.54501	1.48318	0.655779	-1.23012	1.91565	0.147786	1.83664	0.60269	-0.54678	0.550092	0.21003	-0.505519	0.829486	0.429659
Sdhb	ENSMUSG00000009863	-0.455978	-0.27948	0.177185	0.318729	0.781305	0.727835	0.944588	0.647601	0.999571	0.242532	0.562983	-1.01903	0.953849	0.999931	0.241132	2.48624	2.08475	0.706336	2.42752	-2.16921	1.22495	2.69685	2.93848	2.07476	1.11133	1.38883	2.16233	1.79456	1.81256	2.50994	2.22287	1.29651	2.18639	1.70648	1.33079	2.61356	2.7675	1.99952	-1.93795	2.75412
Snap47	ENSMUSG00000009894	0.498403	-0.713927	0.607614	0.270009	0.747866	0.495653	0.892718	0.389843	0.999571	1.79621	1.51806	-0.0551985	0.242761	0.616236	0.980641	0.79	-0.834542	0.616597	2.0613	-1.56742	1.60932	1.98739	1.97553	-2.35817	1.2655	1.39458	0.612373	1.32916	1.4246	-1.88065	2.5513	1.08012	2.23603	0.869123	0.101272	0.680759	0.916289	0.410293	1.36375	0.769213
Kdsr	ENSMUSG00000009905	-0.706962	-0.593352	-0.63842	0.330249	0.790514	0.391222	0.865974	0.247576	0.950228	0.0118604	0.0435636	0.0689928	0.995607	0.999931	0.975303	1.93249	2.03515	2.37587	0.843134	0.79248	0.867555	0.817688	0.759105	1.38093	0.834314	1.32097	0.373539	1.22522	1.9604	1.79492	2.29819	1.21848	0.955762	1.18642	1.16195	1.5119	2.29326	2.33469	0.928342	1.69942
Vps4b	ENSMUSG00000009907	0.0111852	0.715984	0.147975	0.981032	0.995123	0.370744	0.863388	0.77507	0.999571	0.677342	0.525392	0.400631	0.907915	0.999931	0.618472	0.976988	1.31211	0.946453	1.6821	1.09573	1.44679	2.00239	1.13917	1.26972	2.47474	1.66994	1.13441	1.5922	1.63598	0.394266	1.5972	1.95908	1.77238	1.91508	0.933107	1.56302	1.56101	1.11755	2.13508	1.35225
Rps25	ENSMUSG00000009927	-0.0749364	-0.393136	-0.000593684	0.700201	0.941554	0.350001	0.856465	0.997868	0.999862	-0.224927	0.183202	-0.525295	0.937554	0.999931	0.525645	3.08517	2.81315	3.00237	2.59585	1.87035	2.88204	3.14048	3.2397	2.61428	2.73745	2.66035	3.04805	2.08897	2.42777	2.39859	2.68554	3.10116	3.39958	2.48063	2.56536	2.71123	3.11243	2.20274	2.29897	2.22163
Taz	ENSMUSG00000009995	-0.694709	-0.923248	-1.84803	0.315664	0.779042	0.399708	0.868751	0.000277866	0.0246616	-0.801353	0.177005	1.58134	0.836626	0.999931	0.121522	1.3176	0.654507	2.28992	1.61064	1.53819	1.07623	0.567981	1.4643	0.990046	-0.0516652	-0.482809	-3.30664	-0.458647	0.975927	0.0468293	0.207455	-1.34784	3.11827	2.43329	1.53056	0.752379	-0.506507	1.21064	1.8442	1.51134
Aldh3a2	ENSMUSG00000010025	-0.474258	-1.01763	-0.572734	0.427745	0.835889	0.213463	0.800182	0.110938	0.739013	-0.477804	0.165471	0.546995	0.810449	0.999931	0.767882	2.17958	2.29381	3.00663	0.471779	0.813549	1.10512	1.63074	0.539322	0.603199	1.12105	2.18687	0.0913207	1.41155	2.21704	1.50906	1.12717	1.32719	3.28287	0.408564	2.24558	0.995093	1.75685	2.65728	1.54903	1.98244
Hyal1	ENSMUSG00000010051	-0.147085	1.00402	0.411066	0.833725	0.968828	0.111047	0.651313	0.614935	0.999571	-0.0694932	-0.70258	0.534103	0.992158	0.847597	0.801751	-0.620653	-0.527788	1.90697	0.343001	0.898724	-0.170858	0.659585	2.28558	1.86238	2.0534	0.00303068	1.71375	-2.06629	-0.0768641	0.487312	0.477923	2.13222	0.784962	2.01556	0.652434	1.11409	0.732936	1.90132	0.288052	0.0354158
Tusc2	ENSMUSG00000010054	0.0308627	-1.6345	-0.666545	0.96406	0.993304	0.0389896	0.380041	0.40027	0.999571	0.63547	0.727078	-0.584784	0.926038	0.999931	0.551111	2.30207	0.759497	0.619803	0.612797	0.217678	0.719563	-1.44345	-2.12674	-1.83019	1.64105	-3.84136	1.4406	-0.753683	1.26603	-0.0906128	1.41365	1.5501	1.83875	-3.58363	0.641237	1.14531	-1.94525	1.71792	-1.07552	1.84035
Nprl2	ENSMUSG00000010057	-0.6596	-2.15513	-0.673891	0.176929	0.666723	0.00470367	0.096509	0.103306	0.727533	-1.60473	0.616295	-0.352255	0.458606	0.999931	0.767555	-1.45013	0.583098	1.83582	-0.795632	-0.861994	-1.16458	-0.922071	-2.02225	-1.59896	-0.87155	0.566371	-3.41206	-0.636292	-0.76419	-0.0699955	-0.622657	0.735698	-0.584532	0.675865	-2.03404	-1.59751	0.0660828	-0.177283	-0.96773	-0.0577629
Slc38a3	ENSMUSG00000010064	0.175203	-0.389149	-0.565996	0.809933	0.963749	0.683699	0.932683	0.302731	0.988646	0.4765	0.634598	0.264087	0.942554	0.999931	0.885305	-0.562057	1.74849	-2.62376	-0.195957	1.04984	1.1355	-0.847425	-3.36673	0.0809498	-2.64604	-0.207904	-2.85991	0.719355	2.31134	2.57792	0.992589	0.392207	-0.220773	1.78998	0.583205	0.399932	1.40533	0.916281	0.520154	-0.130301
Rassf1	ENSMUSG00000010067	-0.542679	0.302794	-0.427288	0.432445	0.83832	0.660733	0.928018	0.579614	0.999571	-0.310283	0.0098046	-0.491982	0.968615	0.999931	0.806605	1.02868	0.45405	1.53884	1.30925	0.591994	0.73193	0.732128	2.11439	0.717736	0.654723	-0.124315	0.487895	0.410985	0.234795	0.483368	0.793728	0.303366	1.19361	1.26204	1.8341	0.780058	1.06075	0.454669	0.0889191	0.442865
Rnf112	ENSMUSG00000010086	0.913945	1.27169	-0.138809	0.119008	0.579512	0.189276	0.778097	0.831261	0.999571	1.13209	-0.103055	1.46064	0.823758	0.999931	0.111938	-0.343603	-0.310328	0.204354	1.39606	2.05436	2.02721	0.711408	2.08211	0.877193	0.993099	-0.58387	-0.164115	-1.74901	1.02231	1.06885	-0.642278	1.06344	2.54575	1.93621	2.10802	0.551451	-0.139972	-0.00124412	1.48216	1.07387
Slc3a2	ENSMUSG00000010095	-0.103948	-0.464502	0.09681	0.586941	0.905178	0.289924	0.842733	0.578876	0.999571	-0.166131	0.873172	-0.635888	0.948492	0.678286	0.121699	3.31331	2.98096	2.76893	3.05586	3.023	2.85294	3.27627	3.67793	2.5735	3.33258	3.30898	2.81785	3.37106	2.81307	2.59195	2.5109	3.13229	2.77053	3.01907	2.72447	3.65143	3.23662	1.97126	2.69292	2.53073
Nxf1	ENSMUSG00000010097	-0.0587112	0.531249	-0.670174	0.877357	0.974886	0.233157	0.819923	0.285365	0.976917	0.178757	-0.949579	-0.461451	0.957688	0.670372	0.786484	1.74249	2.19617	0.97894	2.43966	2.12211	2.0948	2.37014	1.02641	2.08042	2.68444	-0.16055	0.515258	1.96243	2.50857	1.11021	1.47278	1.85735	3.14437	1.96251	2.05954	1.64906	0.00542644	2.56338	1.47529	1.96361
Stx5a	ENSMUSG00000010110	-1.10413	-2.36126	-0.472622	0.0710639	0.462448	0.00105178	0.03002	0.446326	0.999571	-0.588993	2.26755	0.478239	0.901229	0.0937503	0.723522	-0.127152	1.46636	1.86767	1.3755	2.00868	-0.153685	0.593005	0.31626	-0.478074	0.78367	1.40802	0.310948	1.36891	1.49234	-0.293059	1.81753	2.07474	1.60587	1.57497	0.939748	1.33388	0.617358	2.00612	2.13522	0.511989
Tnfrsf13b	ENSMUSG00000010142	-0.296534	0.11953	-0.530366	0.623418	0.916743	0.861329	0.970003	0.274643	0.971181	-2.21343	-1.67009	0.54614	0.00601334	0.549828	0.798283	1.01645	1.48017	2.54488	0.814862	1.0234	1.20275	0.149829	2.62599	2.71021	-0.23435	1.69244	2.42138	-0.879983	-0.773571	-0.522145	-0.119306	1.31969	2.90991	-2.97783	1.00194	1.28955	0.968044	0.290371	1.96586	0.173983
Prox1	ENSMUSG00000010175	0.889712	-0.163611	-0.860229	0.0602753	0.428504	0.890431	0.976511	0.0900359	0.696134	-0.919077	0.483104	0.571954	0.843671	0.999931	0.663004	1.36939	-0.606279	-0.488661	-3.39483	-2.60045	1.8817	0.711807	0.614062	-0.310259	-2.17929	-3.31531	-3.07618	-3.11527	-3.30528	-2.91973	-2.05341	-0.00638988	1.78809	1.36211	-0.734839	-0.424709	0.614741	-2.92678	0.779216	-2.19333
Tmem86a	ENSMUSG00000010307	-0.353398	-1.441	0.0243847	0.469512	0.855419	0.0834037	0.568733	0.945318	0.999571	-0.457301	0.470727	-0.123464	0.918254	0.999931	0.929695	2.46821	2.65437	2.77523	2.38687	1.99823	1.87832	2.24173	3.15821	1.88955	2.00418	2.42426	2.26716	2.10437	1.99709	2.40775	1.71689	2.30796	2.03885	2.48648	2.11537	1.96174	2.33848	2.2452	2.54118	2.42232
Tex14	ENSMUSG00000010342	-0.984876	0.861783	0.745067	0.00967389	0.159598	0.360131	0.860822	0.0493702	0.553125	0.28789	-1.28761	-1.69726	0.93977	0.865035	0.21037	-0.678745	-0.82901	-3.31391	0.186506	-2.45403	-1.13229	-1.11183	-2.68476	-1.20616	-0.116306	-1.05994	-0.258032	-0.140993	-3.43456	-2.48448	0.14374	-1.02257	-2.05031	-3.32346	-1.69922	-3.24452	-2.04361	-2.90809	-2.89334	-2.53842
Ifi35	ENSMUSG00000010358	-0.854938	-1.99476	0.0698352	0.189615	0.684334	0.00418242	0.089145	0.913402	0.999571	-0.092468	1.25791	-0.641247	0.98638	0.777765	0.744849	0.549445	1.82942	1.27539	1.49152	0.743014	-0.049236	1.48357	0.713079	-0.0900155	1.38968	0.986347	1.45294	1.60484	1.41284	0.296111	1.28177	1.21883	1.90918	2.08532	1.55276	1.19537	1.17318	1.53247	1.38377	0.497134
Nedd8	ENSMUSG00000010376	0.5782	-1.0228	0.340117	0.285849	0.763189	0.371855	0.863446	0.514112	0.999571	0.301014	1.92527	-0.397603	0.950205	0.513659	0.762657	1.63767	1.22156	2.40991	1.43974	2.40429	2.23176	1.42521	2.64683	1.72702	0.8281	2.1759	1.76976	2.14643	2.02247	1.85299	2.19999	1.86242	1.75143	2.41801	1.92076	2.82581	2.35371	2.54038	1.89408	1.92299
Mrpl52	ENSMUSG00000010406	-0.062966	-0.526414	0.261012	0.919491	0.985904	0.647389	0.92505	0.640354	0.999571	0.625921	1.90717	-0.165139	0.901136	0.563936	0.934362	0.795853	2.20911	0.608658	1.63088	0.920327	0.854735	2.57872	0.533895	0.812545	1.15444	2.3231	0.557917	1.54593	2.0284	1.48645	2.35582	1.18197	1.52872	1.76933	0.737117	2.5636	0.934534	1.4599	1.08596	1.48711
Kansl3	ENSMUSG00000010453	-0.373107	1.0324	-0.0637677	0.560348	0.894411	0.141046	0.712399	0.919647	0.999571	-1.54491	-1.03486	1.80942	0.357233	0.332947	0.00116668	1.33933	1.77557	1.04539	1.53432	1.29326	1.42165	0.632775	3.06784	2.51141	2.16487	1.84871	-0.669659	-0.14231	-0.696971	0.146851	-0.343874	1.36169	2.12787	0.713153	2.14297	1.0788	1.44149	2.40491	2.39044	1.40595
Faf1	ENSMUSG00000010517	-0.417544	-0.235111	0.575221	0.136491	0.611214	0.792197	0.958728	0.303901	0.988677	0.835614	-0.304672	-0.510934	0.818771	0.999931	0.683664	-0.929135	-0.265724	-1.93857	-0.635362	0.206338	-3.85091	-1.54505	-2.03881	0.754385	-0.3062	0.943839	-1.01098	-0.535529	0.946565	0.158415	0.0734476	1.46786	0.442835	-0.181633	1.66615	-1.70118	-0.448359	2.17939	-0.883879	1.00341
Mettl16	ENSMUSG00000010554	1.41223	-0.862923	0.0741144	0.00910653	0.154647	0.458144	0.887334	0.927804	0.999571	0.245829	0.572147	-0.910659	0.969165	0.999931	0.632593	-3.28159	2.11591	0.37537	-0.944014	1.26044	0.769143	2.35454	1.20146	0.599122	1.3992	-3.07301	1.8238	1.90518	1.07531	-2.22902	1.5875	1.16414	-1.48831	2.41644	0.789824	0.791814	0.199411	-0.538681	0.626925	0.335911
Rbm25	ENSMUSG00000010608	-0.243838	0.191634	-0.17779	0.266547	0.745686	0.290185	0.842733	0.476026	0.999571	-0.29794	-0.205804	0.55354	0.901184	0.999931	0.0576578	2.33014	2.59053	2.5361	2.43487	2.68974	2.008	2.39599	1.77341	2.75037	3.54027	2.502	3.0089	2.09579	2.25159	2.12352	2.43029	2.77133	2.56243	1.68976	2.84927	2.78623	2.55899	2.96359	3.37021	2.03595
Psen2	ENSMUSG00000010609	0.404377	-1.52055	0.643704	0.413626	0.830782	0.17123	0.755165	0.161039	0.82936	0.402556	0.71837	-0.988055	0.934516	0.999931	0.44843	1.91073	2.41325	1.16792	-0.176064	1.84679	1.65416	1.9316	-1.94721	1.60559	-0.262829	2.01593	2.09845	3.71748	1.98397	-0.150879	3.02927	1.80163	3.1216	1.82328	1.27981	2.02552	2.33174	-0.137017	2.86791	0.953247
Fads1	ENSMUSG00000010663	-0.888166	-1.38732	-0.689177	0.044313	0.365953	0.0874136	0.583651	0.185147	0.878507	0.270334	1.01624	2.15279	0.972444	0.878229	0.00453444	0.826027	1.26673	-2.55015	-0.678268	-2.3755	-3.26145	0.202313	-2.98803	-2.53958	-0.313679	-3.2848	-0.448152	-2.40586	0.827769	-2.31042	0.260074	-2.54011	0.484776	-0.578737	-0.581902	-0.127194	-2.5537	-0.129059	2.7854	-0.558556
Lmbr1	ENSMUSG00000010721	-0.0829012	-0.318354	-0.127392	0.881115	0.975342	0.761256	0.952206	0.745312	0.999571	-0.81799	0.318363	1.61463	0.852774	0.999931	0.0677144	-1.33186	0.132624	-0.94915	-1.64603	-3.38155	-1.0841	-0.311082	-2.77905	-0.633756	-2.46272	-2.97554	-0.938426	-2.81095	-2.97932	-2.71817	-2.4411	-2.99533	0.783114	1.7275	-2.98935	-0.971605	-0.674057	-3.19661	1.77077	-2.87613
Tnfrsf22	ENSMUSG00000010751	0.440667	0.276537	-0.757608	0.427762	0.835889	0.516786	0.897185	0.165635	0.839182	-0.662246	-1.24789	1.05246	0.93977	0.819268	0.375071	0.955201	-0.115676	1.36787	-0.857982	0.958269	1.63432	-0.651513	-2.64831	1.29414	0.782834	-0.985311	-0.105858	-2.09012	-0.100049	0.905332	0.769487	-0.0666398	0.973251	-0.305633	-0.694699	1.39074	0.388894	0.152059	0.892427	-0.502233
Cars	ENSMUSG00000010755	-0.336305	-0.27356	-0.442238	0.543226	0.889233	0.815345	0.961539	0.44534	0.999571	0.240948	0.0520202	-0.57055	0.969165	0.999931	0.762657	2.43553	1.24332	-0.109563	1.55752	2.76622	1.65881	0.385133	0.359001	0.32792	2.04241	-3.68403	1.37087	1.13492	1.34758	-2.20568	1.68108	0.378841	2.33968	-0.507726	2.32576	0.490069	-1.20106	-2.86107	0.885359	0.559152
Gabra1	ENSMUSG00000010803	1.19022	1.03448	0.409335	0.0303899	0.303901	0.251405	0.830619	0.614052	0.999571	0.938514	-0.494482	1.22803	0.874677	0.999931	0.0321357	-0.123685	0.537415	0.335175	0.146247	2.76873	2.04598	1.2277	0.986043	1.40303	0.56993	0.584804	1.53198	0.523276	2.33357	0.446505	0.648918	2.2804	2.48623	1.39216	2.76743	0.381034	0.718395	1.10165	2.87144	1.35963
Apip	ENSMUSG00000010911	-1.26842	0.265874	-0.0752229	0.00318185	0.0837669	0.807575	0.961306	0.882601	0.999571	-0.294479	-1.27191	-0.322581	0.947889	0.868526	0.734018	-1.13653	0.984873	-2.76591	0.375447	-3.50786	-3.27602	-3.43213	-2.32304	-0.266686	-0.190682	-1.0281	-0.930129	-1.94119	-3.21802	-1.5643	-2.63554	0.539231	0.0570305	-3.11474	-0.417807	-2.58227	0.229836	0.95934	-2.16818	-2.07033
Pdhx	ENSMUSG00000010914	0.527977	-0.395823	-0.420164	0.336192	0.794299	0.490027	0.890264	0.590205	0.999571	-0.636596	-0.256424	-0.225812	0.890705	0.999931	0.912493	0.842367	0.699916	2.02726	0.659791	2.46723	1.75741	0.902261	0.594393	1.37894	2.74881	0.100872	0.834951	1.50558	1.36422	-0.434758	1.15687	1.11706	1.46434	1.77022	0.99399	1.12898	1.1565	0.229417	1.44733	0.514256
Vac14	ENSMUSG00000010936	0.252104	-1.84134	-1.28092	0.667949	0.930545	0.0188314	0.243437	0.0118189	0.259971	-1.3177	1.48298	0.324139	0.652717	0.55076	0.872667	0.477172	1.63413	-0.490064	-0.798311	-2.30992	0.93294	-2.49008	-2.34674	-3.0554	-1.28621	-3.73399	-3.24929	1.91429	-0.901277	-1.67547	-0.971694	0.379264	-0.58171	1.09249	-0.681706	0.259576	1.82502	1.87459	1.28997	0.611825
Akt1s1	ENSMUSG00000011096	0.633225	-1.55901	0.143197	0.171633	0.658154	0.043395	0.4055	0.824054	0.999571	-0.576335	0.10232	-0.00578655	0.947565	0.999931	0.998371	-0.559821	1.70419	-1.81381	0.153628	-2.07993	1.03921	-0.797784	-2.26703	-1.60268	2.09419	-1.21444	0.343472	-0.619875	-0.0985803	-0.00581518	-1.09163	-1.65253	-0.604655	-0.513142	0.835888	-1.64527	1.96337	-0.5445	2.395	-0.034088
Tbrg1	ENSMUSG00000011114	0.910348	-0.761301	0.234315	0.0346992	0.321896	0.397777	0.867114	0.64173	0.999571	-0.833889	0.743385	1.49515	0.906082	0.999931	0.0959873	-3.29644	2.05561	-0.0608297	-0.276506	-1.72131	1.04727	1.13737	0.903641	0.498408	-0.883458	1.10633	-0.631198	-1.85617	-0.594826	-1.34577	-0.539153	0.78665	3.13722	0.759804	0.0312617	0.809232	0.324328	2.66081	2.25409	1.7114
Adssl1	ENSMUSG00000011148	-0.45242	-1.64722	-0.803316	0.300973	0.77285	0.109428	0.648215	0.0171902	0.322036	-2.16146	-0.326894	1.11284	0.0586001	0.999931	0.465484	0.149412	1.89219	2.30095	0.776614	0.0174844	1.25643	-0.275707	-1.67747	0.681904	-0.156129	1.78745	-1.00412	-0.637778	-0.802303	0.195596	0.246803	1.07405	3.43368	-0.645558	0.109794	0.361313	0.911125	1.74724	1.84955	0.469889
Cfap161	ENSMUSG00000011154	-0.480699	2.01657	0.508996	0.122391	0.586572	0.0103674	0.165807	0.182008	0.870122	-0.153419	-1.01755	-1.66007	0.957688	0.892245	0.220657	-0.40137	-0.566743	-2.87177	-0.498519	-2.6305	-3.04016	-0.56869	0.717801	0.21498	1.37313	-3.06307	-0.0949521	0.06953	-3.05858	-3.05726	-2.28915	-2.89879	-2.20069	-0.728266	-0.350575	-0.638218	-1.74106	-0.47502	-2.96145	-1.9488
Brf1	ENSMUSG00000011158	-0.198674	-0.48312	-0.761047	0.797206	0.959141	0.613705	0.918804	0.125334	0.777614	-0.0422068	-0.219725	1.29737	0.991903	0.999931	0.322013	1.36099	1.39009	1.21017	-0.476628	2.16314	-0.0798504	1.72968	-1.97242	1.05891	3.29892	1.25536	-3.42437	-1.31986	1.37686	-0.674357	1.71239	1.01777	1.60744	1.16102	0.424738	0.687881	0.388253	-0.555657	1.78705	-0.893748
Odc1	ENSMUSG00000011179	-0.0664234	-0.882435	-0.534032	0.868456	0.973822	0.279048	0.84107	0.0392967	0.504038	-0.447783	0.348035	0.687934	0.871974	0.999931	0.659145	2.12351	2.20669	2.42525	2.10893	2.38915	2.14207	2.15643	2.65148	2.12712	2.26463	2.67758	2.48505	1.66215	2.47219	2.38092	1.81615	2.21598	2.44001	1.93016	2.11524	2.12389	2.17885	1.9224	2.30233	2.29921
Adam19	ENSMUSG00000011256	0.447085	-0.122218	0.0927294	0.571033	0.898505	0.925951	0.981533	0.914046	0.999571	-0.669889	-0.152764	-1.47748	0.941671	0.999931	0.395129	1.40098	-0.669584	1.09887	0.0153705	1.75132	0.655041	1.44627	1.18142	0.735091	1.87756	1.47807	-0.256401	1.70896	-0.0762253	-0.0831768	-0.0668035	-0.857748	-0.0755333	-0.329613	0.468499	0.686483	-0.955104	-0.627154	-0.520757	0.407408
Pabpc4	ENSMUSG00000011257	-0.574312	-1.76652	0.344819	0.462757	0.851724	0.0401051	0.388289	0.636589	0.999571	-0.496653	0.822539	-1.67987	0.952038	0.999931	0.137097	0.57191	0.205221	1.2706	0.286117	-0.657971	0.110502	0.159879	-2.41915	-1.48178	-0.816141	0.82627	1.13804	1.46682	0.245818	2.29482	-0.672253	0.48445	2.11425	0.496184	0.942081	-1.47999	0.089513	0.518605	-1.11169	0.697993
Sugp1	ENSMUSG00000011306	0.242771	-0.111932	0.441348	0.631452	0.920252	0.92971	0.982418	0.483721	0.999571	0.853142	1.64556	-0.958374	0.892055	0.63593	0.519086	0.845329	0.830794	0.981731	1.64078	-0.11848	1.90072	1.37516	1.89841	1.3631	-0.219323	-0.520287	2.05735	2.14093	1.68987	0.137962	1.74679	-0.47957	1.93507	1.54363	1.00514	2.40708	0.840852	2.33172	1.65742	2.14615
Dhdh	ENSMUSG00000011382	0.23443	-1.09373	-1.17227	0.626047	0.917513	0.251815	0.830739	0.0370953	0.49059	-1.01121	0.0157184	0.371056	0.825494	0.999931	0.839137	0.977542	1.80366	1.05398	-0.431052	0.0789311	1.28795	2.18486	-2.27265	0.43287	2.66853	-0.435419	0.495567	1.65397	0.303683	-1.2238	1.66918	0.759947	1.8462	0.873395	0.482914	0.584153	0.126272	2.01672	1.85794	-0.2789
Fuz	ENSMUSG00000011658	-0.955742	-1.85423	0.181775	0.0685893	0.454281	0.0233382	0.280409	0.833943	0.999571	-0.873964	1.17893	-0.726365	0.903836	0.899153	0.713055	0.392421	-0.281353	1.56352	-0.506676	-2.56763	-3.21253	0.396196	1.3139	-2.27516	-1.48801	0.238096	0.989758	0.921687	0.525133	-2.03853	-1.41076	0.800919	1.73081	0.978798	0.484435	-2.29005	1.14699	-0.380369	0.612381	-1.32574
Pgam1	ENSMUSG00000011752	0.20288	0.421887	0.0306787	0.597153	0.90823	0.156527	0.732963	0.912666	0.999571	0.14495	-0.852263	0.62685	0.951756	0.507934	0.338856	2.22	1.9675	2.53496	1.90239	2.71968	2.24087	2.45761	2.22987	2.8647	2.15399	2.70434	2.65994	2.13684	2.69615	2.08122	2.99473	2.42568	2.35616	1.85888	2.44808	2.29135	2.18542	2.83072	2.95341	2.26468
Evi5	ENSMUSG00000011831	0.376475	-0.784291	-0.255082	0.545772	0.890198	0.534785	0.901815	0.718789	0.999571	0.141573	1.79436	-0.0741436	0.982164	0.60345	0.976568	0.289355	1.00136	-0.199901	-0.444023	0.32315	0.198347	0.263368	-2.30261	0.784007	0.876294	0.425955	-3.2663	2.41281	0.941286	-1.86146	1.33592	0.663064	2.06658	1.87191	-0.0800101	2.15406	0.560735	3.36714	0.697651	0.91254
Git1	ENSMUSG00000011877	1.4329	0.27862	0.128065	0.00120386	0.0470565	0.826999	0.965194	0.842669	0.999571	0.10649	-0.258809	2.02044	0.988379	0.999931	2.2476e-05	-1.02496	1.18999	-3.14781	-0.722678	-2.00713	1.48422	2.9747	-2.16736	0.0812044	2.84813	1.43537	-3.31499	-1.80223	0.379709	-1.112	-1.19812	0.638545	2.77471	-0.326734	-0.48645	-0.0516597	-0.971876	1.5475	2.42247	0.581983
Gltp	ENSMUSG00000011884	0.358628	-1.00925	0.465228	0.520245	0.879434	0.385446	0.865974	0.477927	0.999571	-1.56755	0.32791	-1.93454	0.329744	0.999931	0.0125837	1.60663	1.63674	1.36272	0.568147	-0.273982	1.45986	2.1315	1.60899	1.64237	1.96292	0.989321	2.26618	2.60011	-0.535904	0.328561	-0.0439058	1.62642	2.69328	2.14357	1.22008	1.57446	1.21308	2.41378	-0.187399	1.41244
Bnip2	ENSMUSG00000011958	0.245162	0.830691	0.0891475	0.680231	0.93329	0.213514	0.800182	0.891659	0.999571	-0.526289	-0.871142	-0.635072	0.943372	0.683505	0.646505	1.7566	1.9539	0.486395	-0.210892	0.95467	1.35625	1.49286	-2.3865	2.41885	2.02963	1.38982	0.702251	2.39213	0.716265	2.58083	0.717472	1.65994	2.41539	1.8057	1.73908	0.983707	1.55802	1.5258	-1.6764	1.36614
Ccnt1	ENSMUSG00000011960	0.258517	0.827436	0.362913	0.562884	0.895417	0.455819	0.886325	0.638177	0.999571	1.59997	0.43976	0.286623	0.478083	0.999931	0.874691	0.0651968	0.353669	-0.403515	2.03225	-1.62372	0.553534	2.18231	0.200799	0.132539	1.3732	1.59026	0.173691	1.83584	1.64463	-1.94824	2.78404	0.677062	2.01115	1.80031	-0.430382	0.0502119	1.30175	0.0819438	1.19601	0.269982
Brms1l	ENSMUSG00000012076	-0.459173	0.386733	0.465915	0.432877	0.83832	0.663461	0.928153	0.341568	0.999571	1.33899	1.0559	-0.4921	0.696121	0.929062	0.625291	-0.480824	-0.571313	-2.54407	-0.122667	-2.97808	-0.523242	-0.301978	-2.41975	-0.0103164	-1.96356	-0.540291	0.207881	-1.74355	0.296221	1.47399	0.655511	-0.0281803	0.809595	0.981395	-0.699194	1.3652	1.61778	-0.50537	-1.94862	-0.813145
Med15	ENSMUSG00000012114	-1.07267	-0.453685	-0.435728	0.124312	0.59152	0.724484	0.943984	0.596501	0.999571	0.35895	0.150326	-0.160909	0.956152	0.999931	0.946245	-0.931785	1.03153	0.196987	1.66494	0.337129	-0.206817	-1.38821	-2.78746	-0.939971	0.613551	0.634335	-3.07877	0.934501	1.61348	1.3426	-2.26806	-0.597334	1.38475	1.53426	-0.845574	-1.06388	0.516614	-0.292893	-0.0787691	0.4261
Dhdds	ENSMUSG00000012117	0.084721	-0.550024	0.788918	0.904925	0.981904	0.627428	0.921059	0.264761	0.959698	1.71146	1.06806	0.230083	0.278258	0.894787	0.923761	-0.481115	-2.91611	1.08072	1.04991	0.139702	0.195274	0.954649	0.464979	-1.68293	0.238828	0.123795	1.9943	-1.56364	1.98683	1.43614	1.3064	-1.69691	0.629691	2.02005	1.77604	0.735887	1.20002	-1.01487	1.57147	-1.31398
Tjap1	ENSMUSG00000012296	1.2053	-0.938792	0.332337	0.0215261	0.253289	0.375909	0.865254	0.590929	0.999571	0.518719	0.0377486	0.977538	0.93977	0.999931	0.57669	-0.956008	2.0061	1.20906	0.449109	1.62798	1.59609	1.72356	2.85905	1.39125	-0.646503	0.840473	0.217024	-0.279984	2.06608	-0.19549	2.01041	3.31986	2.05503	0.178224	1.48103	1.19499	0.863002	1.99888	1.63737	0.872409
Rpl15	ENSMUSG00000012405	-0.188725	-0.673261	-0.303856	0.484575	0.863761	0.256686	0.833395	0.281463	0.976678	-0.689998	1.29726	0.488989	0.711614	0.718119	0.513694	1.92701	2.353	2.5008	2.10739	1.71137	2.09418	2.2343	2.24863	2.06721	1.74966	2.02303	2.0743	2.12869	1.40904	1.01799	3.00756	1.98324	2.32499	1.86487	1.86967	2.40836	1.76183	2.9811	2.45872	2.00445
Tmem167	ENSMUSG00000012422	-0.281617	-0.234137	0.174501	0.514151	0.877246	0.738559	0.946667	0.595802	0.999571	-0.0852968	-0.0988894	-0.433758	0.98234	0.999931	0.720691	2.06078	2.73096	1.77372	1.85679	2.10368	1.87722	2.52518	0.330918	1.65111	3.28113	3.01246	1.61605	2.38606	1.84586	2.67755	1.90799	1.98904	1.13968	1.369	1.62835	1.13876	1.89269	1.02758	1.80476	1.81628
Mplkip	ENSMUSG00000012429	-1.11519	-1.15809	-0.0882555	0.108242	0.555223	0.329899	0.851382	0.907012	0.999571	-0.359191	0.231081	-0.500314	0.956375	0.999931	0.664494	-0.358182	1.70006	1.2129	1.80537	1.0674	-0.112803	0.741351	0.46564	0.465772	1.07516	0.0198929	1.34957	1.95356	0.797897	-0.997069	1.68598	0.945735	1.34761	1.28136	0.688229	0.400175	-0.402836	2.52916	1.37931	0.546814
Tnpo3	ENSMUSG00000012535	-0.34006	-0.424273	0.731603	0.669368	0.930613	0.60319	0.916973	0.135423	0.794498	0.0702569	0.189828	-1.00496	0.989993	0.999931	0.171154	0.288664	0.832545	1.80388	0.209825	1.71656	0.14007	0.580402	-2.97756	-0.0903386	0.243542	2.10954	2.35314	2.73143	1.03869	1.09503	2.01049	1.28523	2.74952	1.60161	1.23967	0.367891	0.251578	1.3946	0.0667641	1.27798
Ttll5	ENSMUSG00000012609	0.572102	-1.78428	0.305792	0.366495	0.809619	0.0207077	0.260394	0.698116	0.999571	-0.461845	0.70131	0.610184	0.953369	0.999931	0.71316	-0.291506	1.92066	-0.274585	-0.374127	1.76324	1.12223	1.03119	-2.73235	-2.10041	0.48562	0.760472	-0.18207	1.45338	-0.44399	-1.31435	2.55543	-0.054102	1.63243	0.919394	1.84207	0.297973	-0.873079	-0.334521	1.8435	0.992591
Zfp715	ENSMUSG00000012640	0.26363	-1.83945	-0.194059	0.655091	0.928733	0.0177761	0.234259	0.81152	0.999571	-1.3721	0.64612	-0.644596	0.614206	0.999931	0.547406	-3.38251	1.52545	2.5205	1.20327	-0.269421	1.2741	0.121841	1.48655	-0.955134	1.93791	-3.1327	1.74037	-0.434163	-0.262677	-0.133169	-1.66033	-0.994456	1.68895	1.12595	2.22083	-0.947636	-0.454395	1.96576	-0.622487	1.20772
Rps5	ENSMUSG00000012848	0.0566988	-0.247865	0.400714	0.821758	0.965638	0.665073	0.928153	0.0379208	0.496891	0.10721	-0.0251019	-0.569361	0.972444	0.999931	0.172305	2.74732	2.77141	2.56145	2.81139	2.76653	2.63486	2.92694	3.04786	2.7353	2.86434	3.08405	3.16076	2.82361	2.72148	2.63742	2.46797	3.36259	3.1328	2.92709	2.76366	2.60411	2.82652	2.39767	2.6629	2.67892
Adgrl1	ENSMUSG00000013033	0.885282	1.26276	-0.38452	0.113695	0.569799	0.0968038	0.61705	0.60512	0.999571	1.31538	-1.05814	1.70578	0.60426	0.564487	0.0214175	0.838457	0.977664	0.864161	0.793765	0.839738	2.08633	1.21156	1.04186	2.01551	2.20839	0.857074	-0.505015	-0.973385	2.1966	2.14426	1.86952	1.51696	0.463304	1.34034	0.91769	1.00958	1.96303	2.05916	1.34531	1.55356
Amotl1	ENSMUSG00000013076	0.316917	-0.244794	0.762726	0.601074	0.908723	0.831513	0.965989	0.258517	0.952284	-0.0472013	0.191603	-0.261205	0.992404	0.999931	0.810193	-0.562916	0.860819	1.71467	1.53328	0.54359	1.41012	1.43298	2.2778	1.36068	1.71949	1.07648	1.77142	2.39762	1.78553	-0.349868	-0.029855	1.29664	2.21695	1.63783	0.846157	1.15327	1.2607	2.67236	2.20835	1.92474
Etv5	ENSMUSG00000013089	-0.405142	-2.30006	0.0406251	0.594813	0.907604	2.54519e-05	0.00152065	0.946616	0.999571	0.222444	0.950489	1.53071	0.957937	0.933213	0.218548	2.13568	2.09811	1.59598	1.58339	2.42397	1.13679	1.13509	2.30036	1.02044	1.88602	1.6878	1.39593	1.1894	1.91384	1.29451	1.92551	1.70115	0.987944	1.61574	1.71955	1.62945	1.7031	0.985212	2.02219	1.50075
Gfod2	ENSMUSG00000013150	1.14051	-0.337339	-0.0470354	0.0299342	0.30191	0.706176	0.938621	0.868317	0.999571	0.358257	0.911711	0.616705	0.953638	0.999931	0.643525	-2.93223	-3.13099	-0.0978925	-2.32165	0.399508	1.20651	-1.89801	0.32275	-2.7283	0.652308	-3.25063	-2.95068	-2.68464	0.0308452	-2.64205	-3.44072	-2.72246	-0.275195	-0.162324	0.375722	-0.116644	-0.107711	-2.74222	0.549712	-0.987747
Enkd1	ENSMUSG00000013155	0.0550026	-1.24226	-0.297737	0.924514	0.986155	0.103972	0.636695	0.554037	0.999571	-0.684008	1.41208	-0.396591	0.920074	0.743009	0.804993	-0.866724	0.91671	-0.94252	-1.17177	-2.08479	-0.212857	-2.05005	-2.9038	-3.08539	-2.54582	-3.4689	-0.499495	0.159746	-1.15729	-2.61108	0.244631	-0.383317	0.586547	-0.563496	0.114125	-0.713295	0.746394	-0.379164	-0.169902	-2.18709
Atp6v0d1	ENSMUSG00000013160	-0.175354	1.02285	0.127995	0.795842	0.958318	0.273236	0.840621	0.880056	0.999571	0.622426	-0.251982	-0.626956	0.93901	0.999931	0.558368	-0.431187	1.60245	0.536698	1.05611	0.904808	0.790585	-0.0522709	2.76417	1.6905	2.28208	-0.111486	1.34727	-0.870594	1.81854	1.32623	-0.429344	1.06337	-0.207603	-0.868573	0.61308	2.33882	1.84676	1.31781	-0.857747	-0.060804
Ptprs	ENSMUSG00000013236	0.646571	-2.24405	-0.514256	0.245018	0.730318	0.000223957	0.0087245	0.479291	0.999571	0.474786	-0.262225	-0.0472197	0.933031	0.999931	0.978884	1.54749	1.92232	1.31387	1.34617	2.4675	2.01121	1.77025	2.99255	-0.362282	1.35849	0.850167	-0.118944	1.94965	2.05413	-0.315327	2.15343	1.78884	1.6793	1.83686	2.77615	1.29593	1.61055	0.326004	1.879	0.942147
Slc41a1	ENSMUSG00000013275	0.623227	-1.1626	0.88122	0.212119	0.701734	0.298678	0.846056	0.208089	0.915229	0.602932	0.133277	0.363222	0.925943	0.999931	0.860196	0.443866	1.29049	0.327513	0.612363	-1.29961	1.27098	2.39305	1.55769	0.606859	1.324	1.53245	2.36	-1.36604	1.19874	-0.762055	1.83478	1.71608	2.84476	-1.18159	0.0433184	0.71864	0.0606245	0.0762485	2.1154	2.93291
Igf2bp1	ENSMUSG00000013415	0.103507	0.92924	0.284525	0.857787	0.971935	0.32033	0.849251	0.478667	0.999571	0.539427	-0.254349	0.748619	0.923641	0.999931	0.669661	-0.9435	-0.632651	-1.96436	0.110149	0.101763	-0.314845	-0.888771	-2.50451	0.679903	0.27647	-0.979652	0.259248	-1.32473	0.00736887	-1.02423	0.533327	0.0589317	1.0505	-0.442952	-0.0978188	0.279086	-0.690949	0.532734	0.84289	-0.963527
Zfp651	ENSMUSG00000013419	-0.170007	-1.91179	-0.433703	0.825072	0.966869	0.0263696	0.299029	0.599717	0.999571	-0.0419171	1.05151	0.604199	0.994901	0.811726	0.789555	0.516175	1.28989	0.592466	0.236393	0.580439	0.469323	0.5688	-2.67459	-2.13029	1.69314	-1.08979	1.55507	-1.66387	0.298427	-1.36941	2.16458	0.914824	0.510832	-0.692247	-2.54296	0.810899	-1.8056	-2.90488	1.70662	0.411249
Nelfb	ENSMUSG00000013465	0.482987	-0.857523	0.214966	0.359149	0.805578	0.460491	0.887781	0.804864	0.999571	0.737532	0.927521	0.53394	0.926038	0.999931	0.804563	-0.433239	1.78306	1.32032	2.26759	0.0150177	1.90363	2.6992	2.9371	1.32667	1.32384	0.239406	1.86039	-0.147421	1.11072	-0.0724591	3.16734	-0.282114	1.71144	1.68121	1.60681	1.65941	0.603355	2.76348	1.7098	0.537512
Tmem175	ENSMUSG00000013495	-0.631459	-0.265155	1.90941	0.146086	0.624464	0.645701	0.924679	7.13612e-09	5.87762e-06	0.574383	1.46284	-1.21685	0.854478	0.674639	0.409582	1.795	-2.97304	-1.73825	1.95428	1.00994	0.0736901	0.797928	2.11798	-1.83936	1.22938	2.57568	2.73782	1.37892	-0.429288	1.39084	-1.54668	1.33716	1.59811	1.77682	1.62786	0.938525	-1.09051	0.389771	1.16896	1.37001
Bcas1	ENSMUSG00000013523	0.609873	1.22031	0.0274852	0.2833	0.761257	0.158492	0.737072	0.937751	0.999571	0.121649	-1.19253	-0.313006	0.972444	0.886935	0.708613	-1.27569	-3.09666	-1.11985	0.536394	-2.92516	1.38499	-3.17856	-2.29252	-0.394	-2.98849	-3.49667	-0.761275	-2.21218	-3.48561	-1.73343	0.464408	-0.197137	0.987758	-1.00365	-1.21622	-3.01865	-0.824064	-0.542112	-2.46332	-1.55241
Tango2	ENSMUSG00000013539	0.522558	1.42803	0.117823	0.451568	0.847582	0.0545844	0.459687	0.884508	0.999571	-0.528451	-1.7452	-0.358428	0.950205	0.348235	0.860286	0.280564	0.240414	-0.359889	-1.4503	0.205284	1.28647	0.808899	-2.57075	2.07606	-1.00123	1.95249	-0.882239	0.981087	0.448837	1.59513	-0.887247	0.85332	1.93416	1.67152	-0.0729554	-0.312422	1.65655	-0.486182	0.385424	-0.0225138
Ndufs2	ENSMUSG00000013593	0.136034	1.10297	0.588517	0.8238	0.96608	0.206464	0.797336	0.32197	0.993814	0.484776	-1.43732	-0.00160854	0.942554	0.606519	0.999081	1.09459	1.31953	1.48192	1.89932	1.07859	1.54127	1.55223	3.05666	3.25562	0.237848	2.13544	1.75629	1.65352	2.10055	1.92678	1.59842	1.63775	1.64769	1.66844	1.36223	1.30875	1.97429	2.49239	1.39262	2.16268
Atraid	ENSMUSG00000013622	0.0773657	-1.18472	0.168608	0.820134	0.965638	0.234578	0.821415	0.64124	0.999571	-0.321825	-0.136492	-0.246665	0.953849	0.999931	0.818389	2.26551	2.59684	1.41365	2.44547	1.43172	2.43658	2.61783	2.98823	1.6533	2.01416	2.26714	2.13616	2.09824	1.44476	2.17958	1.91123	2.09035	2.34226	2.30285	3.21109	1.85146	2.72221	2.10759	2.11935	1.51808
Sh3bp5l	ENSMUSG00000013646	1.55267	2.39435	1.11716	0.000131951	0.0112706	3.16903e-07	3.69112e-05	0.0319831	0.45444	0.168847	-2.06304	0.95219	0.971265	0.103709	0.525645	-3.50562	-3.10943	-1.14622	-1.7495	-0.317931	1.30839	-1.06269	-2.21893	1.70993	-2.68481	0.895581	-0.0950658	-2.23299	-1.02167	-1.70259	0.59367	-3.16304	1.09286	-0.65822	-0.075418	-0.450686	0.717408	-3.20158	0.733455	-0.903687
Atad1	ENSMUSG00000013662	-0.446701	-0.659217	0.375649	0.467584	0.853523	0.571008	0.912205	0.545816	0.999571	0.347929	0.217669	0.524855	0.953638	0.999931	0.767882	0.926293	0.940815	1.51129	2.17798	0.322649	1.26901	1.62727	1.99536	0.966011	1.33699	1.86815	1.84882	-0.429652	1.60212	2.81537	1.28015	1.12142	2.06956	2.22709	1.47318	1.03879	1.22343	2.1299	1.36171	2.39881
Pten	ENSMUSG00000013663	0.16014	-0.564323	-0.266299	0.699009	0.940961	0.350034	0.856465	0.443654	0.999571	-0.259778	0.230403	-0.661945	0.941671	0.999931	0.659145	0.652678	1.90718	3.5641	2.52266	3.17605	2.47439	1.21067	2.88786	1.64157	2.21496	2.58484	0.989983	1.96039	2.55847	1.86949	1.80361	1.66831	1.79222	2.14525	2.08567	1.71724	3.09577	0.809715	1.10885	0.991901
Pea15a	ENSMUSG00000013698	-0.00535451	0.097027	0.25745	0.9936	0.998327	0.904627	0.977859	0.666596	0.999571	-0.0142258	-0.922378	-1.34894	0.99716	0.921216	0.139586	1.51929	1.7026	1.78039	1.65452	2.52372	1.53817	1.48692	1.64631	2.05325	1.77984	1.45658	1.94832	1.89784	1.71521	1.78977	1.70071	1.799	1.86744	1.47038	1.69357	1.57853	0.576375	2.3102	0.498118	1.78925
Timm23	ENSMUSG00000013701	-0.173248	-0.669223	0.220147	0.744314	0.950167	0.578708	0.913383	0.377352	0.999571	0.258217	-0.120883	-1.71945	0.970497	0.999931	0.098094	2.17049	1.41951	-0.0789794	2.15943	0.432812	1.93955	0.745535	0.842701	0.569183	1.65147	2.37253	2.42945	3.22333	1.61687	2.06706	0.13843	1.67138	0.272837	-0.513672	0.869368	0.470701	2.92509	0.0600286	1.2293	0.0689745
Tnfaip8l2	ENSMUSG00000013707	0.33114	-1.32875	-0.356575	0.53894	0.886395	0.241622	0.823974	0.585948	0.999571	-0.154133	0.255832	1.27681	0.978968	0.999931	0.355071	1.88675	1.61478	0.242789	-0.331651	-1.93465	0.789006	3.55792	1.18783	0.561806	1.85364	0.329853	-0.150951	-1.06671	0.701661	-0.398109	-0.305595	1.1718	2.90704	1.33248	-0.0833575	0.436016	0.0460137	-0.510368	1.91919	2.10375
Trnt1	ENSMUSG00000013736	0.298743	-0.886425	-0.171173	0.512462	0.877013	0.461548	0.887875	0.813849	0.999571	-0.0790142	0.427747	-0.791396	0.990045	0.999931	0.725755	1.62002	1.8579	0.950109	1.47118	-0.236811	1.68721	2.35788	1.36864	1.44892	2.06958	1.58968	-3.29501	2.69816	1.24475	0.0821954	-0.586495	-1.15243	3.03579	1.42175	1.23363	1.58675	0.969849	2.20281	-0.606975	0.793958
Ehmt2	ENSMUSG00000013787	0.808851	0.744655	0.861923	0.261179	0.740513	0.503211	0.893341	0.293576	0.979498	1.68034	-0.063354	1.31297	0.237051	0.999931	0.360681	-0.658437	-0.184006	-0.945741	-0.779817	-0.162292	0.851322	-0.0134433	-2.7695	-0.18693	-0.134293	1.12805	-0.559976	0.698292	2.02506	1.09746	0.0221516	-0.171038	0.631146	0.518206	0.767538	0.0537199	1.57463	1.66772	3.02475	0.927029
Elof1	ENSMUSG00000013822	0.0860153	0.434106	0.0216181	0.915349	0.98469	0.683369	0.932683	0.980237	0.999589	-0.222251	1.77604	1.14492	0.980458	0.491285	0.476283	1.05569	0.227938	0.928537	0.623764	1.84837	0.638235	0.7829	1.48086	1.01886	1.66686	0.642289	0.846599	0.0405867	0.107308	0.0920113	1.28815	1.95293	0.905959	1.41092	1.0613	1.78269	0.45303	0.663266	1.13628	1.12748
Med16	ENSMUSG00000013833	-0.119335	-0.192955	-0.275198	0.821644	0.965638	0.709261	0.939192	0.663452	0.999571	-0.675853	-0.261082	-0.289728	0.918254	0.999931	0.799727	0.917437	1.83286	1.9716	0.663881	0.718505	1.50402	0.751744	0.806903	1.08785	0.918852	0.927714	0.484215	1.10852	0.788337	1.3561	0.477131	1.0239	1.0644	1.28153	0.839289	1.17613	2.14307	0.569021	0.883191	1.31445
St3gal1	ENSMUSG00000013846	0.185325	0.990394	0.608416	0.754293	0.951095	0.332613	0.851538	0.346953	0.999571	1.41222	-0.0152303	-0.11822	0.652697	0.999931	0.958645	0.0320174	0.443512	1.10072	3.17517	2.49276	1.95985	1.55117	2.99761	1.59502	1.58298	2.02119	1.11616	1.16491	2.13251	1.42134	1.81273	3.25436	1.87703	2.10052	1.31247	0.979566	0.807028	2.2116	1.31559	1.0307
Tmem259	ENSMUSG00000013858	0.946998	-0.465039	-0.197731	0.0660691	0.44631	0.710761	0.939883	0.801492	0.999571	-0.953204	0.5045	1.24311	0.883427	0.999931	0.356446	0.449465	0.969776	1.25013	0.639152	2.21722	2.21097	1.62931	1.41985	1.30347	1.2438	1.27896	0.0187885	-0.13663	-0.414862	0.0642291	1.79349	1.70521	1.85229	1.25181	1.43627	1.47905	-0.127525	1.15347	1.82037	1.53648
Rnf170	ENSMUSG00000013878	-0.231256	0.517149	-0.348644	0.731528	0.94829	0.659434	0.928006	0.656962	0.999571	0.2872	-1.29499	-0.00284392	0.96831	0.755272	0.999081	-0.290102	1.79207	-2.44706	0.199247	0.783472	0.469484	-1.27663	-2.78814	1.10241	2.31211	-0.141871	-0.670072	1.42059	1.32862	-1.66863	-2.10095	-2.39143	0.955858	-1.24617	-0.399282	0.0986172	0.83929	-2.71935	1.08671	-0.322964
Clip3	ENSMUSG00000013921	1.07879	-0.945437	0.452913	0.0156312	0.209161	0.430893	0.879973	0.546758	0.999571	0.790522	0.126242	0.622018	0.875124	0.999931	0.749015	-0.780622	1.75263	1.41759	1.25309	1.96674	2.21913	1.92054	1.92757	1.4957	1.31103	1.6418	1.52952	-0.791422	2.35254	2.01916	1.73704	1.51871	2.35216	1.48378	2.32976	1.41823	1.33954	2.18386	1.73691	1.24368
Dedd	ENSMUSG00000013973	1.22319	1.30794	0.979519	0.0112507	0.172975	0.230718	0.818245	0.119682	0.764389	0.0399387	0.054707	1.30019	0.991884	0.999931	0.364489	-1.18882	-3.11684	-0.599708	0.171497	0.602799	1.71542	0.487492	0.707469	-0.517915	1.99511	1.16222	-3.14016	-3.13378	-1.23048	1.54441	-1.29578	-0.211176	-1.08472	1.21674	-0.341291	-0.638115	-1.2727	-0.48308	0.740317	1.40424
Nit1	ENSMUSG00000013997	0.614731	1.65015	0.214596	0.223758	0.715507	0.015865	0.219089	0.800238	0.999571	1.46625	-1.21213	-0.139602	0.515934	0.806076	0.957684	-1.08203	-0.0695149	-0.724892	1.07629	0.433124	1.62626	0.0371918	-2.34283	1.33029	0.366342	-0.611189	-0.386534	1.54825	0.571107	-1.80805	2.74243	0.133977	1.1396	1.49452	-0.919756	-0.0605497	-0.184859	-0.425054	0.731086	1.22174
Prdm15	ENSMUSG00000014039	0.259698	0.420609	-0.342129	0.724686	0.946038	0.722143	0.943436	0.461944	0.999571	0.27424	-0.379004	1.07972	0.957281	0.999931	0.356054	-0.272219	0.602311	-3.43694	-1.46003	-2.25804	-0.0709414	-0.110313	-2.61141	-0.947524	-0.0046692	-3.58361	-1.19049	-2.75192	-0.562658	-2.39076	2.0276	-1.08166	-1.77322	-3.42251	-0.58209	-0.381491	-1.71476	-0.144323	1.05883	-0.56117
Rnf168	ENSMUSG00000014074	0.542974	0.244517	-0.768333	0.43415	0.838327	0.848681	0.968368	0.232696	0.936854	-0.196822	0.182566	2.93938	0.981427	0.999931	2.49894e-09	-0.220764	0.159183	0.516779	0.103938	-0.121481	1.20113	0.296734	0.760718	0.439955	0.0977556	-0.0511038	-3.15671	-1.44258	-0.174837	-1.27378	0.877235	0.803328	1.07687	1.49341	0.651205	0.386386	1.39829	1.97347	3.1714	-0.444175
Tctex1d2	ENSMUSG00000014075	0.00217822	0.539036	0.642988	0.996168	0.998786	0.638508	0.922883	0.134074	0.792564	0.401199	0.944256	-0.702627	0.956152	0.899153	0.682342	1.3003	1.18639	0.222777	1.6801	1.97466	2.06323	1.47916	0.981346	0.843808	2.25569	1.35304	2.40401	1.29858	1.2747	1.83115	0.947921	1.31578	1.32559	0.712035	2.15876	2.64841	1.87158	-0.330126	1.28821	0.697337
Chp1	ENSMUSG00000014077	-0.00293581	-1.72367	0.393877	0.994289	0.99852	0.0827609	0.568008	0.215663	0.925006	0.21024	0.456139	-0.333221	0.956152	0.999931	0.669156	2.37399	2.44796	1.69051	2.19814	2.9261	2.32768	1.53798	1.01449	1.30297	2.02231	2.3216	2.46693	2.89732	2.3354	2.51571	2.43664	2.17036	2.71606	1.56521	3.47204	2.40619	2.01569	2.78457	2.45051	2.76981
Tvp23b	ENSMUSG00000014177	0.498946	-1.33258	-0.389208	0.282527	0.760109	0.201609	0.795365	0.617551	0.999571	-1.36065	0.580314	-0.488468	0.711614	0.999931	0.79461	-0.0912715	1.92998	3.04642	0.263316	0.247481	2.28016	1.48834	0.678671	0.67581	0.916185	0.24074	2.75273	1.31464	0.549302	1.26059	0.982587	1.18789	1.54619	2.06717	1.20127	1.05625	2.40462	2.40211	1.53629	0.225435
Dnajc7	ENSMUSG00000014195	-0.15318	-0.559304	-0.149982	0.61949	0.915271	0.4552	0.885847	0.69694	0.999571	-0.0514147	0.303725	0.224176	0.988091	0.999931	0.838731	2.05074	2.22449	1.92744	1.96579	1.70464	2.08383	2.40254	0.563446	0.835386	2.60516	1.66162	1.99896	1.40425	1.61975	2.07658	2.70052	1.85896	2.22932	1.73583	2.48085	1.58779	1.51766	2.22924	2.21591	1.38395
Cacybp	ENSMUSG00000014226	-0.434148	-0.492248	0.0349503	0.342038	0.798873	0.569147	0.911568	0.927735	0.999571	-0.269022	1.22374	-0.194923	0.950205	0.892245	0.874431	1.99273	1.26301	2.84124	1.74701	0.768866	1.38991	1.79705	0.622225	0.924154	1.48312	1.62422	2.49248	1.45774	1.54738	2.02145	1.92004	1.10854	2.29033	1.96282	0.701593	2.01959	1.01861	2.40434	2.00858	2.37586
Cluap1	ENSMUSG00000014232	0.284804	-0.402193	-0.0465969	0.652179	0.928728	0.683456	0.932683	0.952995	0.999571	-0.0457319	0.234243	0.230608	0.994211	0.999931	0.910075	0.242958	-0.112314	2.68813	0.538304	2.39612	1.28688	-0.128194	-2.7675	-0.624144	1.43591	1.54525	-0.0855307	1.11239	-1.06789	0.82228	3.05074	0.113143	0.746567	1.63623	1.68035	-0.330993	0.255593	1.9947	0.621144	-0.429682
Zswim7	ENSMUSG00000014243	-0.171717	0.81052	1.78734	0.744557	0.9502	0.468546	0.888383	0.00033929	0.0277472	1.14531	-0.246281	-2.14955	0.575742	0.999931	0.0220418	-3.59392	-0.661976	-0.450196	-0.513851	-0.0125198	-1.1689	-0.0204667	-2.07699	-0.105002	1.93941	0.992895	1.24668	1.69706	1.03303	-0.794963	-0.5739	0.0775813	-0.261158	-0.847363	1.47829	-2.53542	1.09475	-0.347018	-1.77565	-1.71878
Ndufa2	ENSMUSG00000014294	0.287166	0.801383	0.429795	0.382491	0.815438	0.109551	0.648215	0.214247	0.923891	0.416439	-0.455131	-0.422483	0.918254	0.899153	0.593645	2.64569	2.06177	1.80085	2.00455	1.73856	2.42047	2.78481	2.48033	2.80505	1.99162	2.29481	2.5481	2.22518	2.01866	2.21071	2.98931	2.06631	2.32087	2.21503	2.6523	2.40455	2.31046	2.54057	2.05134	2.4273
Pam16	ENSMUSG00000014301	0.722716	-1.62155	0.455317	0.306536	0.774807	0.0363751	0.365914	0.542836	0.999571	-0.648422	1.77337	-0.709323	0.941623	0.362873	0.388601	-1.38275	1.58904	0.841351	-0.701146	2.26499	0.154752	0.981293	-1.7779	-1.00526	0.650762	1.26264	0.498944	0.225463	0.0515523	0.953227	0.981469	1.64146	1.07735	0.585355	0.860506	2.38852	-0.858445	0.722897	-0.192078	1.32956
Cox6c	ENSMUSG00000014313	-0.159856	-0.180188	-0.0275649	0.361747	0.807117	0.63175	0.921059	0.849882	0.999571	-0.220774	0.47914	-0.296971	0.884164	0.897258	0.501805	2.7363	3.15884	3.42961	3.13664	3.33734	2.93352	3.13048	3.54127	2.79232	3.56765	3.17688	3.221	3.0335	3.21367	3.06991	2.95679	2.97493	2.94217	3.09702	3.41678	3.48725	3.24389	3.18543	3.0248	3.09056
Bicc1	ENSMUSG00000014329	-0.0456712	1.00588	-0.623659	0.954388	0.991499	0.0914797	0.598881	0.303182	0.988646	-0.142532	-1.94096	0.972105	0.986046	0.340846	0.443242	-0.469342	-0.0930058	1.37624	-0.714684	2.14917	0.0517397	-1.25404	-2.5462	1.61751	-1.84013	-0.10948	-0.768431	-2.54105	0.42446	1.19276	1.17617	0.403954	1.23638	-0.762664	0.00291685	0.195328	-0.525634	-0.50324	0.323082	-0.318355
Ube2z	ENSMUSG00000014349	0.37485	-1.31991	-0.856558	0.437589	0.841278	0.134445	0.701522	0.00566215	0.17646	-0.214117	1.18401	0.903928	0.942554	0.901476	0.598986	1.22173	2.24213	2.42468	1.2087	2.96306	1.99157	1.29333	0.550096	1.55112	1.44025	1.79979	1.30085	0.105467	2.06914	2.28141	3.03939	1.78956	1.84211	1.99556	1.45309	2.07654	1.30861	1.25787	1.84368	2.30276
Tmem87b	ENSMUSG00000014353	-0.045747	-0.13499	-0.127244	0.924582	0.986155	0.901225	0.977456	0.81586	0.999571	-0.0984421	0.448979	-0.734102	0.987357	0.999931	0.680521	3.08051	1.86992	0.312233	1.79676	2.4566	1.86659	1.23398	-2.63659	1.97719	2.66956	0.115389	2.09541	2.21262	1.19058	2.26988	-0.500377	-2.4196	2.82484	1.73916	0.571203	2.22636	-0.911116	-0.507432	1.71882	1.38085
Anapc1	ENSMUSG00000014355	0.824761	-0.670963	-0.351588	0.130812	0.604446	0.598353	0.916188	0.658931	0.999571	1.18019	1.52736	0.436854	0.758142	0.763953	0.815157	1.59059	1.40388	0.884286	1.04674	2.58047	2.2415	2.5853	2.39421	1.62501	-0.0242506	1.23425	-0.444469	1.17457	1.50414	1.44875	2.42461	1.17305	1.22897	2.52174	1.42841	2.59621	0.113398	1.79443	1.67093	1.34461
Mertk	ENSMUSG00000014361	-0.1757	-0.169921	-0.148545	0.446355	0.84556	0.730659	0.945713	0.516632	0.999571	-0.0226892	0.454992	-0.153709	0.991437	0.997499	0.862085	2.56648	2.45336	2.75079	2.61346	2.534	2.49307	2.69761	2.8455	2.32632	2.74914	2.68221	2.32819	2.38088	2.41009	2.49431	2.87382	2.40972	2.45333	2.74048	2.81156	2.72774	2.658	2.39238	2.42056	2.70341
Tsg101	ENSMUSG00000014402	-1.16559	0.663962	0.705295	0.106042	0.549068	0.540983	0.903642	0.217231	0.927049	-0.988592	-1.19064	0.00868045	0.83871	0.72409	0.996364	-0.438872	1.84259	0.579292	2.26376	-0.3636	0.11327	-0.073391	1.11187	1.6306	0.868633	2.14086	1.47675	1.98562	-3.19554	-1.22532	0.909307	0.874215	0.877673	1.70759	0.753763	-1.82135	0.516223	1.57981	1.54682	1.85348
Hps5	ENSMUSG00000014418	-0.551281	-1.74705	-0.176212	0.274042	0.75159	0.0269373	0.302833	0.742236	0.999571	-0.0859116	1.79514	1.24152	0.989957	0.373402	0.371206	-0.39862	0.872093	-0.0797473	-0.660858	-0.765235	-0.307831	-0.168648	-2.29434	-1.93912	1.58454	1.46742	-3.28928	-1.17963	0.727484	-0.723952	-1.66897	1.09895	1.27645	-0.755323	-2.37184	2.60906	0.427632	1.32537	1.58518	-0.326369
Map3k4	ENSMUSG00000014426	-1.6015	-0.635345	-0.775653	0.0174187	0.222664	0.598729	0.916188	0.305827	0.989753	0.0479859	-0.153617	1.32378	0.994025	0.999931	0.351885	1.56482	1.75358	0.169224	2.1365	0.818603	-0.0201849	-0.538017	0.379968	0.44631	0.721851	0.767101	-2.96384	-1.6501	0.693838	1.21103	0.831224	-1.83542	1.00788	-0.12749	0.949217	0.152799	-0.714468	0.64633	0.811797	2.04876
Piezo1	ENSMUSG00000014444	0.915543	-0.207832	1.02943	0.138921	0.616113	0.842179	0.967109	0.121894	0.770147	-0.63491	0.14762	-0.503607	0.926038	0.999931	0.809148	-1.97656	1.79303	0.233746	1.26155	2.33517	1.45418	0.726246	1.4036	-0.051153	-1.89388	1.93518	0.14286	1.93352	-2.97759	-1.83813	1.0163	0.669865	1.88022	1.87079	2.95177	-2.43411	-0.286876	-3.42643	1.44969	1.40905
Rnf166	ENSMUSG00000014470	-0.133227	0.245542	0.717311	0.83527	0.969211	0.835387	0.966239	0.14906	0.811416	-1.0455	-0.0650016	-2.21361	0.812699	0.999931	0.00146972	0.443406	1.26479	-0.365332	1.26715	0.660433	0.97344	0.228011	-2.23094	0.419366	2.86142	1.26531	1.77685	2.33483	-3.76748	-1.55736	0.924451	0.683086	1.50077	1.31442	-0.456077	0.287793	-0.217748	-3.01066	-2.44262	0.18402
Srp19	ENSMUSG00000014504	-0.0741074	-0.914797	0.550907	0.902354	0.981227	0.331334	0.851382	0.222456	0.92981	0.138221	-0.0247053	-0.433282	0.976558	0.999931	0.73715	1.65283	2.3709	2.05206	2.06578	3.31564	1.83512	1.99763	2.97548	2.20827	2.2552	2.40833	2.63112	2.0812	2.3152	2.38861	1.78099	2.23366	2.43444	2.4398	3.62671	1.89833	1.93717	2.62019	2.22928	2.36827
Mrps25	ENSMUSG00000014551	0.283564	0.743949	-0.119908	0.66775	0.930545	0.0421575	0.398729	0.849622	0.999571	-0.0302166	-1.35184	-0.810624	0.992194	0.414327	0.57554	0.210031	2.56749	2.56625	-0.309737	2.79825	0.933413	2.26711	-0.105016	3.15187	0.31021	0.748286	2.98868	0.901971	2.84975	2.09491	3.00335	1.33729	1.08939	1.51883	1.38231	1.54853	1.42543	-0.170348	0.571136	0.860005
Dguok	ENSMUSG00000014554	0.301558	0.009697	1.57076	0.662066	0.929763	0.991794	0.997497	0.000101584	0.0122017	1.80525	1.28402	-0.814646	0.0279462	0.794891	0.385817	-1.1667	-3.31837	-0.273397	0.768364	-2.03823	-0.151389	2.06664	-1.94564	-2.57497	1.57893	0.543782	1.57398	-1.23105	0.94787	-0.398427	1.8994	0.693752	2.48817	0.828225	-0.571131	-0.162749	-1.55156	-0.168913	-1.62489	-0.25456
Camta1	ENSMUSG00000014592	0.171181	-0.479328	-0.0626919	0.664973	0.930445	0.67696	0.931285	0.908883	0.999571	0.317084	-0.00380079	0.882079	0.953685	0.999931	0.0934029	1.7481	1.34706	-0.0888725	1.3821	0.883046	1.92766	1.01289	-2.13683	0.815303	2.02224	-0.352243	2.95527	2.44198	1.51147	-0.631464	2.08284	1.234	3.58916	1.30926	2.21693	0.949802	1.24091	2.00113	3.94568	0.747886
Csf1	ENSMUSG00000014599	-1.24858	-0.597117	-0.220454	0.0215266	0.253289	0.564837	0.91108	0.748095	0.999571	0.339683	1.81029	0.811183	0.949587	0.582673	0.66558	1.60256	1.77594	0.981485	1.26467	0.393	-0.750969	2.19696	3.14632	1.57233	1.15537	1.22859	0.595308	-0.356012	2.04208	-0.0854478	1.41579	1.44511	2.00612	1.52986	0.722054	2.4032	0.787126	0.0931323	1.48503	2.31357
Strip1	ENSMUSG00000014601	-0.0131005	0.0812748	-0.963745	0.982086	0.995123	0.934927	0.983419	0.207154	0.912269	0.432191	-0.357403	-0.41275	0.950205	0.999931	0.693849	1.33113	0.312853	1.30314	1.42228	0.989541	1.65235	0.21503	-2.57506	1.01533	3.1617	-0.51553	-0.150352	-1.26107	1.25018	3.57179	0.862268	0.879996	1.624	1.76341	0.200791	0.571071	0.189228	2.12983	-1.41538	0.238451
Kif1a	ENSMUSG00000014602	0.485374	-1.56723	-1.71284	0.289024	0.765703	0.127121	0.687629	3.87364e-07	0.000114531	-0.6292	0.119558	1.25276	0.838738	0.999931	0.262878	0.00975276	2.09274	2.52498	-1.33443	0.710333	1.92813	-0.197589	-3.03947	-0.0716595	-2.58303	-2.94669	-2.98543	0.360417	1.74086	0.0707912	1.62137	-0.327485	1.58387	1.95214	-0.152879	-0.282201	0.221612	2.237	1.9967	0.0943648
Slc25a11	ENSMUSG00000014606	-0.868047	-0.446611	0.924882	0.212722	0.702217	0.715154	0.940979	0.0711361	0.647411	0.796938	0.38521	1.86582	0.880482	0.999931	0.0990525	1.64704	1.53891	1.41531	2.188	1.78848	1.07608	1.34475	2.8966	1.77604	0.400781	1.93749	2.77545	0.262612	2.10157	1.87828	1.89728	1.96586	1.92482	1.76328	1.83189	1.77108	1.98089	0.678416	2.96823	1.80545
Cmc2	ENSMUSG00000014633	0.554048	0.832568	0.686476	0.386352	0.8156	0.394428	0.866357	0.386209	0.999571	1.42256	0.0430883	-2.06759	0.653405	0.999931	0.081833	0.223247	-0.332853	0.261401	0.773806	0.54901	1.40893	1.65938	0.113975	0.511776	1.63863	1.76723	0.136697	1.1753	1.32354	1.16416	1.68397	2.01179	0.83213	1.84787	0.247704	0.618315	1.56645	0.06144	-1.7182	-0.651767
Chfr	ENSMUSG00000014668	-1.19088	-2.87207	-1.85604	0.0423711	0.355331	4.93909e-09	1.18111e-06	5.93016e-06	0.00126631	-2.33873	1.03818	1.01825	0.0103198	0.914272	0.405619	-0.404534	2.26988	1.40871	-1.18553	0.146723	-1.35785	-1.0222	-2.20547	-2.86297	-1.33887	-1.52172	-3.33221	-2.05967	-0.24836	-1.58424	-1.12162	0.420878	1.60572	-3.21617	-0.323641	-0.219242	-2.30034	0.0177566	0.853548	0.203965
Tex261	ENSMUSG00000014748	0.721226	-0.551925	0.701974	0.126458	0.595252	0.579648	0.913383	0.154343	0.819732	0.102805	0.321697	0.157605	0.982164	0.999931	0.839137	1.29975	2.52332	1.63222	1.44487	2.63951	2.49453	1.49116	1.36179	2.01701	1.76008	2.16072	2.78695	2.165	2.27535	2.36291	1.73355	3.31072	1.96555	2.0437	2.08416	2.19338	2.71807	2.4428	2.84521	2.06743
Fam120b	ENSMUSG00000014763	0.983635	0.296029	0.183491	0.0930425	0.519803	0.810763	0.961539	0.835578	0.999571	0.568383	0.587184	-1.38514	0.93977	0.999931	0.458204	1.16784	-2.97052	2.21281	0.498422	2.34742	2.019	0.574569	0.918155	1.83405	2.19707	0.782624	-0.378111	2.87967	1.6882	-0.282701	-0.35304	-1.08059	2.72766	1.94977	1.52749	2.07709	1.02972	1.9777	-0.734506	-1.20228
Tbp	ENSMUSG00000014767	-0.63809	-1.43707	-0.336827	0.277107	0.753791	0.169243	0.752593	0.662827	0.999571	-1.25009	0.163103	-0.797072	0.7837	0.999931	0.587484	0.343094	2.03596	0.233939	-2.36251	-1.88921	-0.570927	2.19009	1.57527	0.354175	-1.14343	-3.86467	1.68845	-1.62005	-0.494255	-1.08851	-0.799591	1.57205	2.65568	2.55115	1.1574	-0.0491893	-0.182749	-2.79098	-1.84582	1.77196
Psmb1	ENSMUSG00000014769	-0.0707382	-0.154069	0.0958027	0.817868	0.964947	0.712599	0.94013	0.758101	0.999571	-0.80784	-0.935918	-0.803782	0.812088	0.76784	0.394021	0.728766	2.45666	2.72406	2.08528	1.10886	2.47982	1.63269	0.867158	2.28021	1.69799	2.39194	2.73233	1.76271	1.46115	2.7622	1.27454	1.38512	1.82119	1.45293	1.05488	1.01593	2.73755	1.23645	1.39133	1.33617
Pdcd2	ENSMUSG00000014771	0.49876	0.124528	0.505736	0.143863	0.622653	0.899437	0.977456	0.347858	0.999571	-0.377224	0.572276	1.36824	0.925828	0.999931	0.157011	-1.26427	-0.213356	-2.65682	-0.837139	1.92381	-0.902828	1.12396	0.90454	0.576314	-1.345	2.20055	-3.17892	-2.24636	-2.97021	-2.07612	-1.30343	0.844037	1.67982	1.97628	0.0618803	0.687798	-2.41989	-3.34937	1.22489	0.341032
Fhod1	ENSMUSG00000014778	-0.808227	0.70504	0.185069	0.148737	0.626885	0.0895017	0.590077	0.564544	0.999571	0.00517097	-1.55106	0.18655	0.999379	0.364376	0.846092	1.59343	1.68942	0.939211	2.06202	1.0322	0.900115	1.46195	-2.26305	2.21417	2.41636	1.65169	1.73275	2.12914	0.727528	-1.03766	3.50597	0.663124	2.97655	0.988388	-0.120954	0.68144	-0.467574	2.11063	2.76807	1.46705
Tmem208	ENSMUSG00000014856	-0.446066	-1.33524	-1.32476	0.522243	0.880793	0.0701912	0.519163	0.0486411	0.550422	-0.38352	0.972989	-0.290738	0.95659	0.987753	0.779223	1.06395	2.07699	-2.12299	0.456315	-1.3163	0.146339	0.897793	-1.8173	-1.81458	1.90691	-3.20856	-1.02637	-0.761907	0.0453007	-0.158038	2.0832	1.45045	-1.56388	-3.06605	0.643241	0.777803	-1.05064	1.34888	-1.1495	-1.17138
E2f4	ENSMUSG00000014859	-0.240392	-2.24539	-0.136538	0.698989	0.940961	0.000524501	0.0168	0.735417	0.999571	-0.926695	0.564984	2.46634	0.875027	0.999931	5.15633e-07	-0.48897	1.4959	1.61067	0.584745	-0.527259	0.413857	-0.534633	2.1082	-0.260652	-0.805989	-0.30354	-0.453169	-0.337464	1.09949	-0.389522	-0.8486	-0.258897	0.991636	-0.56269	-0.156853	-0.252334	1.47711	1.58555	2.51385	0.453502
Surf4	ENSMUSG00000014867	0.146835	1.31337	0.193887	0.812699	0.964204	0.0252188	0.293456	0.727786	0.999571	0.309492	-0.71148	0.00611295	0.948752	0.999931	0.998382	1.31256	2.1692	0.542285	0.0504	1.41471	1.08585	0.657929	-2.28252	3.00138	1.43074	1.42936	0.165653	2.10231	1.55908	-0.709122	1.87308	1.17847	3.30789	1.89958	0.282013	2.71492	2.20029	1.70589	1.90198	0.433159
Surf2	ENSMUSG00000014873	-1.01475	-0.443888	-1.28874	0.0865337	0.504204	0.706901	0.938621	0.0111693	0.25106	-1.43877	-1.37722	0.821564	0.509454	0.718354	0.506837	-2.92494	2.31929	-0.322921	-0.270681	-0.651808	0.0592633	-1.69587	-3.1409	-0.958561	0.684391	-2.58291	-2.96035	-3.6955	-0.215753	0.764398	-3.83841	-3.39001	-1.03761	-2.68691	-0.958063	-3.3732	-0.895726	-3.20787	-0.343865	-1.92455
Dnajb9	ENSMUSG00000014905	-0.868739	-1.76447	-0.898147	0.202266	0.693306	0.062548	0.488612	0.152175	0.816914	-0.626056	0.773598	0.926357	0.833305	0.999931	0.131508	2.2222	2.53768	2.98519	0.496432	2.18012	0.354101	1.13652	0.822257	1.27761	0.360718	0.295215	2.31812	1.95578	2.40624	1.89595	0.276622	1.67138	1.94736	2.68518	1.943	1.53704	1.96293	2.29173	4.01456	1.22221
Naf1	ENSMUSG00000014907	0.93863	1.43186	0.484127	0.151278	0.630198	0.101874	0.6321	0.573543	0.999571	0.0789035	-0.280959	0.233562	0.991259	0.999931	0.922039	0.667587	-0.573691	-0.202382	-1.26209	1.53243	0.951769	0.455927	-2.1517	1.8375	-0.250563	1.03223	-0.806614	2.18283	-0.0322205	-1.0093	0.0182694	0.632433	2.80148	1.04617	0.169106	1.67047	-0.95486	2.04578	1.54192	1.78765
Yes1	ENSMUSG00000014932	-0.506474	1.28003	-0.413414	0.371504	0.810889	0.168412	0.751243	0.570068	0.999571	0.942856	-1.15352	-1.45603	0.883427	0.890122	0.397565	0.840732	-3.00432	0.00408455	-1.88119	0.010624	-1.16356	-0.318111	-2.12314	0.943818	-1.11302	-3.36578	-0.656538	1.80114	0.784126	-1.79591	2.53108	-0.0247754	-0.833264	-0.899693	-0.0482225	-0.0868075	-2.2624	2.096	-2.60866	-0.0710758
Ppp1cb	ENSMUSG00000014956	-0.166671	0.520864	-1.16212	0.749837	0.951009	0.314519	0.848183	0.0876081	0.690505	-0.146813	-1.30925	0.271335	0.972444	0.354685	0.891545	-0.0977519	2.26908	1.77116	2.23824	1.19555	1.77764	1.02042	1.88064	2.07657	1.22425	-0.250571	0.0996261	1.68025	1.72733	-0.617289	1.85661	1.17613	2.05036	2.4178	0.69789	0.742119	1.08178	1.09815	1.60758	2.51007
Gorasp2	ENSMUSG00000014959	0.59014	0.948617	0.713766	0.205273	0.695477	0.113859	0.661561	0.167965	0.843557	0.116197	0.0236972	-0.805763	0.982164	0.999931	0.478308	1.50648	1.7841	1.66049	1.58739	2.18252	2.33486	2.29153	1.78592	2.48338	2.03306	2.04834	2.68504	1.90451	1.85282	1.84435	1.86187	1.91415	2.24796	1.68067	1.71765	2.71809	1.61856	2.32947	1.79493	1.52213
Efr3a	ENSMUSG00000015002	-0.242735	-0.72416	0.0960497	0.586906	0.905178	0.45315	0.884759	0.803069	0.999571	0.142403	1.45174	-0.144302	0.972444	0.695051	0.867338	2.24155	2.44283	1.64024	2.63896	3.20639	2.82423	1.10425	0.812854	2.01266	1.58437	1.75779	2.23701	2.35079	2.50671	3.01675	1.66349	2.13254	3.11223	2.17797	2.06917	3.13066	1.6097	2.76417	2.34418	2.5207
Trappc2l	ENSMUSG00000015013	-1.47306	-1.80256	-1.22873	0.00541099	0.11122	0.0609471	0.482679	0.00617948	0.186506	-2.256	0.0330558	-1.63617	0.00390503	0.999931	0.282785	2.03681	1.22266	1.36283	-1.61554	-0.573379	-1.45905	-0.606514	-2.08234	-0.161914	-0.420754	-1.01927	-0.225824	2.12622	-1.06853	-0.849535	-0.160011	0.016624	-0.0574719	-0.480034	0.36039	-0.24122	1.21763	-0.800829	-1.72423	-1.51985
Acsf3	ENSMUSG00000015016	0.216272	2.56381	0.466173	0.670188	0.930613	7.8385e-10	3.01286e-07	0.172687	0.850599	0.432429	-2.15273	0.123663	0.920074	0.111949	0.923303	-0.793827	-3.07499	-3.11963	-1.39467	0.374208	0.000208769	-2.64121	-3.06068	0.333213	0.0815453	-3.13754	-2.96562	-0.404166	-0.768924	-3.10517	-0.350594	-3.1272	-2.57955	-3.11196	-1.20798	-1.06091	-2.21337	-0.525638	-0.300852	-2.47475
Galns	ENSMUSG00000015027	1.51243	1.04174	0.225473	0.00623079	0.121775	0.340312	0.852824	0.61716	0.999571	-0.38334	-0.0954611	-0.281863	0.926038	0.999931	0.858769	-3.15002	-0.419349	0.0950947	-0.38332	2.06609	1.83511	-0.581159	-2.77839	0.550211	2.01467	-0.693277	0.104307	-2.38088	-3.03007	-2.2711	-2.00773	-2.58881	0.829345	0.142518	-2.62516	0.458208	-2.51028	-3.15642	1.15516	-2.40102
Gata2	ENSMUSG00000015053	-0.775626	-1.58433	0.223475	0.0391527	0.340989	0.0411753	0.393819	0.795012	0.999571	0.626549	2.97593	-0.354346	0.927885	0.00428182	0.862645	-0.393618	1.10504	0.844048	0.735324	0.730592	-0.720104	-0.640702	1.90298	-1.06788	-0.52092	-0.189519	1.31009	1.23089	2.09059	1.43469	-0.528973	1.31364	-0.458514	2.09295	0.677762	2.34122	1.82912	1.84634	1.22574	1.51559
Rabl6	ENSMUSG00000015087	0.160787	0.101153	0.264167	0.792047	0.957791	0.931704	0.982807	0.736791	0.999571	0.292193	1.89292	0.0135594	0.966227	0.595035	0.996392	2.617	-0.271147	0.170702	0.507301	-1.56084	1.31765	1.73512	0.93924	0.483931	1.38848	0.577611	-0.412444	1.5728	1.59405	-1.41568	0.986247	0.394258	2.91145	1.25875	-0.680237	3.06515	1.22471	0.81899	1.01845	2.02394
Ptgds	ENSMUSG00000015090	1.63486	0.455705	0.238295	0.000248876	0.0166349	0.696058	0.934913	0.784952	0.999571	0.94124	0.31329	0.109971	0.889274	0.999931	0.934362	0.359461	0.118211	0.288471	0.0494748	0.168729	3.77743	2.74568	1.82335	0.434367	0.592873	0.595146	0.283286	0.885806	1.54098	0.613818	0.581768	1.257	1.62359	0.464863	1.15501	0.876517	1.41969	0.134112	1.16728	0.119751
Edf1	ENSMUSG00000015092	-0.268887	-0.474092	0.139179	0.290221	0.767026	0.526381	0.898428	0.591522	0.999571	-0.546382	0.152383	-1.31808	0.730224	0.999931	0.0712416	2.06526	2.50331	2.52875	1.94778	1.24908	1.91868	2.57993	0.629611	1.05156	3.2093	1.24482	2.93153	3.25537	1.89864	0.167461	2.09762	1.52291	2.79082	1.91983	1.3158	1.23087	1.69801	0.947454	1.93084	1.06923
Npdc1	ENSMUSG00000015094	0.556065	0.147592	0.116784	0.296853	0.770082	0.909983	0.978526	0.895503	0.999571	1.14083	0.19126	0.0182994	0.813886	0.999931	0.994171	-0.66568	0.665091	-0.587606	1.76567	-1.53687	1.96958	0.365297	0.250163	-0.352676	0.993917	0.45936	-0.358425	0.813447	1.69973	0.584194	0.58114	2.47246	1.51891	0.911431	0.0491791	-0.319903	2.05598	2.92818	0.419652	0.241307
Fbxw5	ENSMUSG00000015095	-0.14334	-2.2667	-0.136029	0.813066	0.964204	0.000559565	0.0178242	0.765674	0.999571	-2.13891	0.837287	-0.0998728	0.00126001	0.999931	0.96942	1.98517	1.48252	1.7576	-0.128379	-0.0528737	1.40572	-0.048334	-2.91397	-2.59989	1.42379	2.13805	-0.487815	1.37717	-3.15376	1.72485	-2.16746	1.0627	1.44406	1.94408	0.0637815	-2.60888	0.521488	-0.585554	0.987711	0.263574
Ube2i	ENSMUSG00000015120	0.233362	-1.14063	-1.28614	0.699423	0.941409	0.269024	0.839783	0.0342238	0.468688	0.00562088	0.880659	-0.330044	0.999631	0.999931	0.752459	1.19166	2.04846	0.944073	1.48939	0.48544	1.75692	1.41369	3.00094	1.51185	1.80231	-3.14637	-0.28187	-0.591324	1.03645	-0.311974	1.69093	1.97068	1.54595	0.839051	1.58056	1.93167	0.210126	2.15566	-0.762172	0.586587
Lrrk1	ENSMUSG00000015133	-0.236061	-0.193928	-0.0088489	0.572028	0.898735	0.794106	0.958728	0.986029	0.999589	-0.857878	-0.139656	-0.311678	0.896785	0.999931	0.840284	0.349776	1.41644	2.24382	2.47607	0.948552	2.23578	0.778015	1.24823	0.908889	2.55763	1.60311	1.45476	1.31124	0.494393	1.05026	0.989562	0.763385	1.50946	0.657588	0.887184	0.831685	1.33983	2.38443	1.27958	0.866678
Actn1	ENSMUSG00000015143	-0.732351	0.779632	0.96115	0.23199	0.72001	0.368115	0.863388	0.0409898	0.517009	1.30509	1.05075	-0.25235	0.636683	0.808861	0.845902	2.24247	0.00472571	1.11312	1.19186	1.3087	-0.0222422	1.35505	2.35635	2.04645	1.07906	2.57302	2.21273	1.34307	2.35796	1.28343	2.74159	1.3608	0.96811	1.60591	1.48165	3.60857	2.43496	1.86977	1.55503	1.52527
Sirt2	ENSMUSG00000015149	0.14254	-0.833385	-0.559839	0.619689	0.915285	0.33349	0.851538	0.229982	0.934428	-0.198294	1.53116	0.309372	0.953849	0.689341	0.865475	1.31989	2.41024	2.56205	1.58936	1.49852	2.62933	2.39539	1.61183	0.958792	1.07813	1.87624	0.188803	0.98105	1.81699	1.54182	2.15424	1.24513	2.3595	1.43236	1.05883	2.57871	1.70002	1.00077	1.32555	1.15012
Hnrnpl	ENSMUSG00000015165	-0.463846	-0.00088616	-0.0219652	0.493371	0.867602	0.999306	0.999852	0.971922	0.999589	0.0104927	0.0585483	-0.58707	0.998131	0.999931	0.57669	1.80971	1.40364	0.845907	1.27265	0.595926	1.08488	1.22681	0.935363	1.08548	1.68313	1.59789	0.208337	2.04871	1.20867	-0.00083946	1.14908	1.52771	2.49764	1.20305	1.76904	0.941401	1.76278	1.8746	1.42679	1.08187
Nolc1	ENSMUSG00000015176	0.895099	0.567992	-0.265023	0.219278	0.710643	0.609044	0.917975	0.639425	0.999571	0.403987	-0.530555	-0.398594	0.951756	0.999931	0.735186	-1.06709	0.54616	-0.218861	-1.17234	0.331931	0.19297	1.36507	-2.13516	0.75058	1.18712	0.867915	-3.35603	-1.77813	1.32111	-1.22829	-1.5521	0.184711	1.71809	-3.31492	-3.20559	0.123327	-2.58901	-3.31446	-2.07932	-0.236755
Casd1	ENSMUSG00000015189	0.103011	-0.738042	1.02573	0.888331	0.977293	0.561642	0.91063	0.134443	0.792564	0.450311	1.7803	-0.997317	0.947565	0.637244	0.424077	-0.187299	1.81571	0.323726	0.255514	1.61929	0.491656	0.731273	-2.38632	0.846664	2.16114	1.05127	2.24622	2.4373	1.43129	-0.840227	1.72486	1.53116	2.63078	1.3908	0.30043	3.36675	0.776102	2.36801	1.63578	0.967395
Mtmr1	ENSMUSG00000015214	-0.0962291	-1.66913	-0.16192	0.876023	0.974886	0.140373	0.711012	0.760704	0.999571	-1.70092	0.140159	0.291394	0.306954	0.999931	0.861978	0.660461	1.71912	1.8066	0.658018	0.483958	1.09734	0.0958653	0.792611	0.364502	-0.391515	1.53178	0.0508033	1.22522	-1.26629	-1.08362	2.58483	0.656516	-0.0738177	-1.00182	0.0645242	1.02168	0.829742	1.38665	1.5633	0.592397
Hmgb3	ENSMUSG00000015217	1.41316	0.299643	-0.514921	0.00459356	0.102652	0.815445	0.961539	0.417111	0.999571	0.92824	-0.153099	-0.364883	0.890053	0.999931	0.740761	1.48625	-0.0865647	0.839154	-2.33671	1.44275	2.28965	1.55389	-2.38091	1.31843	0.853471	-0.633094	-0.431818	-0.880876	1.52689	2.62763	1.0599	1.30052	1.38796	-0.0124431	0.888376	1.48691	-0.290114	1.09425	-1.07845	1.11373
Map2	ENSMUSG00000015222	0.333187	0.419013	0.266194	0.531138	0.884881	0.416286	0.876323	0.655834	0.999571	0.164338	-1.24187	-1.43105	0.972444	0.379295	0.13937	-0.044112	1.6002	1.73476	1.39386	0.907241	1.88403	1.78501	0.721717	2.11984	1.8334	1.79288	1.53059	1.57256	2.02359	1.52249	1.60698	1.36925	2.19358	1.15249	1.27915	1.06896	1.9746	1.82153	-0.389602	0.60437
Abca1	ENSMUSG00000015243	-0.212002	-0.582065	0.114262	0.569585	0.897246	0.338237	0.852804	0.666152	0.999571	-0.375036	-0.135758	-1.29206	0.903618	0.999931	0.0976449	2.2406	2.50468	3.0371	2.22936	2.65795	2.06138	2.31399	2.57793	2.2505	1.72438	2.91215	2.59135	3.6976	2.44497	2.16255	1.53509	1.88644	2.15636	2.66526	1.85108	1.60943	2.62243	0.135013	1.75524	2.4461
Nipsnap3b	ENSMUSG00000015247	0.347296	-1.37038	-0.867662	0.659783	0.929264	0.0983788	0.62077	0.16413	0.835529	-0.368257	1.43244	-0.0352123	0.957688	0.588797	0.982876	-0.999898	1.11423	-0.877214	-0.644959	-0.13968	0.148289	1.24399	-2.30217	-3.33402	-0.501196	-1.21902	-3.27943	1.07938	0.254629	-2.04085	-0.240035	-0.341972	-0.0074298	1.65185	-0.82734	-0.686317	-0.730832	-3.143	1.12867	-1.10969
Lage3	ENSMUSG00000015289	0.470472	0.83186	-0.000496377	0.427226	0.835682	0.433415	0.880593	0.999554	0.999862	0.254441	-1.71473	-0.011204	0.972442	0.511173	0.996882	1.96165	1.42243	0.565534	0.383665	0.772161	1.34554	1.06866	0.735335	2.10408	-0.100407	-0.437339	2.31434	-0.998461	1.01424	1.98631	0.0346136	1.32753	2.2352	1.32891	0.664142	0.470215	0.497683	-0.317432	1.48692	1.16491
Ubl4a	ENSMUSG00000015290	0.345861	-0.294385	0.344361	0.597954	0.90823	0.637622	0.922883	0.4781	0.999571	1.54569	0.885302	0.210469	0.435173	0.975031	0.937527	1.23491	-0.888601	-1.92968	0.896867	-1.97393	0.643838	-0.766117	-2.49547	-1.77977	-1.59484	-3.78556	1.73337	-1.02743	0.841579	-0.549715	1.8334	1.47471	2.56528	1.61645	0.640392	-1.82177	-0.694099	1.56166	2.31673	0.347723
Gdi1	ENSMUSG00000015291	0.0429643	-0.840155	0.563743	0.900789	0.980738	0.436858	0.880593	0.0986572	0.715961	0.531445	0.272445	-0.606507	0.898861	0.999931	0.562551	1.92406	1.96522	0.358221	2.88338	2.36407	2.23859	1.70046	-2.62787	1.25332	1.91222	1.53672	2.75413	1.63014	1.66923	2.9964	3.51532	1.60333	2.20612	1.84328	0.928917	0.800898	-0.17596	0.934041	1.84852	1.69412
Sash1	ENSMUSG00000015305	0.336843	-0.998102	-0.749154	0.566681	0.897021	0.349509	0.856465	0.293857	0.97977	-1.52278	0.347058	-2.1553	0.574191	0.999931	0.015075	1.77042	2.16052	2.43306	0.0933831	2.11921	0.963161	1.49615	-1.9271	1.45354	3.75721	-1.18939	1.7259	3.3511	-0.0939681	0.619655	0.722051	-1.2008	0.83397	1.63973	1.26325	1.60737	-0.805923	1.86558	-0.399178	1.17063
Gadd45b	ENSMUSG00000015312	1.11517	0.497228	1.47987	0.0343307	0.320875	0.691902	0.933889	0.00792685	0.212075	1.33262	-1.14309	-0.881753	0.613021	0.930741	0.202314	1.36088	-3.10098	0.932493	-0.0890617	1.17678	1.15802	2.00673	-1.7305	1.12597	2.1485	1.13012	1.74975	-0.277909	1.35082	0.53162	2.15864	1.72276	2.78296	-1.12635	0.752487	-1.64537	-2.4362	-0.0962846	-0.720432	1.54838
Slamf6	ENSMUSG00000015314	-0.62679	1.23117	-0.347047	0.41922	0.83179	0.0427627	0.401872	0.644656	0.999571	-0.49614	-2.09925	-1.41051	0.950205	0.0507627	0.439815	1.04989	1.27824	0.745233	1.18608	1.24533	0.643336	0.127619	0.235784	1.54602	1.28416	0.918398	-0.600434	0.851781	0.261302	-0.464186	0.553383	-0.683924	2.04806	1.10536	0.253125	0.427273	0.11367	-0.561533	-0.571234	0.746962
Slamf1	ENSMUSG00000015316	-1.68776	-1.33377	-0.0938602	0.00047602	0.026138	0.0698277	0.51847	0.901574	0.999571	-0.466624	1.74907	-1.51955	0.950205	0.427853	0.358858	1.6334	1.02483	0.38199	2.50619	-1.3786	-0.732833	0.2633	1.6109	-1.63881	0.82461	0.917983	0.196687	1.51045	-0.850741	-1.12079	1.49455	0.759149	1.69258	1.25134	0.185178	0.732918	0.070498	1.46885	-1.37247	0.687722
Cybb	ENSMUSG00000015340	-0.687168	-0.51825	0.153012	0.130927	0.604613	0.399929	0.868751	0.427913	0.999571	-0.106169	0.113828	-0.572931	0.971793	0.999931	0.321057	2.3392	2.60631	2.07334	3.15448	1.32853	1.30236	2.28182	2.24906	1.59139	1.7383	3.25807	2.5202	2.78098	2.22329	2.42754	2.35192	2.18187	2.23856	2.83714	2.15253	1.36242	2.95742	0.739771	2.25726	2.65423
Golga7	ENSMUSG00000015341	-0.913119	-1.28474	0.573776	0.141599	0.621161	0.26496	0.838973	0.291867	0.978766	0.196445	0.37161	-0.167609	0.972444	0.999931	0.910919	1.68794	2.1801	0.900978	1.32614	1.08176	0.165818	2.42109	2.6206	1.3807	0.806845	2.76069	1.60817	1.91124	2.09535	1.91806	1.17953	1.8078	1.122	2.17461	1.72969	1.29661	1.76423	0.79509	1.87301	2.42509
Pcolce2	ENSMUSG00000015354	0.420629	1.20396	0.0469797	0.455539	0.848734	0.232831	0.819027	0.9185	0.999571	-0.245711	-0.201047	-1.17219	0.95369	0.999931	0.549487	-3.16347	-2.95058	-1.52221	-2.82147	-0.659216	-0.0225646	-2.65704	-2.76157	-1.24164	-0.29342	-0.616356	-3.10615	-0.43008	-2.99343	-0.0690362	-2.86252	-0.606389	-2.93254	-2.97283	-1.04628	-0.840742	-1.41076	0.59116	-4.30572	-0.264571
Cd48	ENSMUSG00000015355	-0.478059	-1.11873	0.909347	0.465209	0.852828	0.323402	0.849251	0.194033	0.894242	1.07895	0.268765	0.284734	0.76524	0.999931	0.831764	0.179672	1.68208	0.740685	0.676046	0.000454901	-0.124182	1.09062	0.743598	0.480909	0.108132	2.54515	1.48953	1.70941	2.0928	1.86765	2.00056	1.58848	0.385688	1.70842	1.46007	0.510476	2.42705	2.2334	1.08727	2.03508
Clpx	ENSMUSG00000015357	0.356251	-0.573914	0.531378	0.611149	0.911556	0.631602	0.921059	0.471083	0.999571	-0.602016	0.864419	-0.665923	0.93751	0.999931	0.590632	-1.11079	1.07222	-0.712929	-2.73785	-2.74762	-0.673913	1.31322	-2.51451	-0.503891	0.955381	-0.756209	1.4526	-1.88955	-0.403527	2.37446	-1.55604	-0.336028	-1.35449	-0.653175	-0.715337	0.632048	0.627298	-0.398226	-2.06651	0.167427
Trabd	ENSMUSG00000015363	-0.562516	-1.61705	-0.536942	0.413481	0.83078	0.0281786	0.312731	0.486904	0.999571	-0.557841	1.11249	-1.57942	0.947889	0.800025	0.351885	1.38757	1.77612	0.035169	0.361367	-0.17022	-0.160721	0.835638	-1.92646	-1.71202	-0.638596	0.202248	-0.764083	1.88066	-0.214959	-0.033535	2.52021	0.85964	-0.323839	-0.511746	0.196077	0.331568	0.0245708	-1.33067	-1.01909	0.0614544
Dennd6b	ENSMUSG00000015377	-0.0571083	-1.88128	-1.61757	0.936341	0.988263	0.0697508	0.51847	0.000108836	0.0124256	-1.01017	-0.495901	1.46664	0.708104	0.999931	0.218922	-0.353509	2.01728	2.50323	-1.46231	1.61042	0.287693	-1.14898	-2.51128	0.036464	-2.26536	-0.734896	-3.21054	-3.02898	1.20986	1.21445	1.52438	0.150706	1.49029	-3.0447	1.54507	-0.500074	-0.609013	1.85921	0.440781	0.00922158
Cd83	ENSMUSG00000015396	-0.670985	-0.290543	-0.103871	0.178541	0.668435	0.708754	0.939079	0.811338	0.999571	-0.0752718	-0.0456029	-0.226832	0.983308	0.999931	0.899403	2.24991	1.33652	2.88815	2.45378	2.38989	1.58538	0.538803	0.977981	1.09618	1.53842	2.71371	-0.579809	2.27605	2.26532	2.24636	0.917464	1.50207	1.61496	1.83551	0.683296	0.773118	2.08932	-0.0846165	1.45895	2.20668
Ace2	ENSMUSG00000015405	0.112786	0.483825	0.127987	0.755938	0.951095	0.625499	0.921059	0.753033	0.999571	1.61276	0.259278	-0.321732	0.326428	0.999931	0.766194	-1.37751	-2.78705	0.560005	-1.25199	1.15898	-0.68564	-1.4445	-2.16536	0.718982	-1.1704	-0.504995	-0.834685	-1.7682	1.77397	2.62512	-1.09769	1.26585	1.50697	1.09333	1.13492	0.655143	0.683111	1.4045	-2.0278	-0.631764
C4a	ENSMUSG00000015451	-1.70365	-2.3879	-1.55136	6.80036e-06	0.00118811	2.17447e-08	3.72836e-06	0.000281923	0.0246616	-2.42142	1.54873	-0.942132	0.00010365	0.546842	0.664359	1.92189	1.79951	2.49859	0.46742	0.747723	-1.6945	-0.353117	4.03302	-1.84179	-0.342793	-1.11653	-3.38574	2.23708	-0.834583	-0.792356	-0.247409	2.29837	-0.519691	0.307124	2.93224	1.42782	0.71982	1.82414	-1.43789	1.88624
Atf6b	ENSMUSG00000015461	0.216735	-0.368402	-1.37747	0.661339	0.92953	0.593789	0.915282	0.0187832	0.339591	-1.08535	-1.42915	-2.12634	0.78246	0.610028	0.0132043	1.66514	2.46765	2.47001	1.10927	2.55984	1.83059	1.94442	2.48473	2.73123	1.83555	-3.02107	2.02331	2.13748	0.932077	-1.10344	1.96844	1.42894	1.94092	0.395772	1.35428	1.10798	-1.56304	0.902401	-1.27012	1.09965
Notch4	ENSMUSG00000015468	-0.339397	-0.111536	0.788699	0.570356	0.897976	0.926375	0.981533	0.295047	0.980458	-0.664426	-0.129761	-1.25424	0.933983	0.999931	0.037903	0.516132	-0.650576	1.77138	-0.0703282	2.46926	-0.504129	0.467711	0.438886	-0.471443	-1.66329	2.07321	0.552461	2.441	-0.509912	-0.517224	0.225028	-0.0139811	0.93709	0.213999	0.428633	-0.0579619	-1.77234	-0.593326	-0.386325	-0.183307
Ppt2	ENSMUSG00000015474	0.318825	-1.68452	0.410712	0.634378	0.921423	0.027864	0.310154	0.611944	0.999571	0.789059	1.74294	0.100008	0.906866	0.437377	0.963156	-0.111136	1.34436	0.812808	1.64985	0.317481	1.51722	1.76125	2.2143	-1.12937	0.68503	1.57662	0.597322	0.914805	1.81649	0.939814	1.59736	2.93932	1.20069	1.88864	0.920036	0.870786	1.66482	1.41023	1.17898	0.930426
Prrt1	ENSMUSG00000015476	0.721845	-1.78396	-0.855266	0.252693	0.737213	0.0170182	0.227653	0.174996	0.855758	0.201761	0.761254	0.00256442	0.974377	0.999931	0.999081	1.83612	0.468727	1.52544	0.305792	1.5661	1.90491	0.396102	0.465947	-0.487492	-0.302695	-0.365234	-0.532576	1.56835	2.15328	2.70441	-0.379355	-0.493629	-0.617316	0.323563	1.16316	-0.46438	0.602649	0.228571	1.37357	0.930362
Cacfd1	ENSMUSG00000015488	-0.836468	-1.03994	0.169228	0.16009	0.642758	0.238096	0.823218	0.847138	0.999571	0.443532	0.657002	-0.63997	0.956152	0.999931	0.71316	-0.387567	0.724463	0.0725111	1.14385	0.45749	-0.117554	-0.819977	-2.9608	-1.3165	1.49723	0.772702	-0.27535	1.52953	1.02612	1.53326	-1.06614	-1.31898	-0.908767	0.723039	-1.49679	-1.33129	-0.639486	0.588767	0.921316	0.539681
Hivep2	ENSMUSG00000015501	0.312666	-1.48547	0.312816	0.568453	0.897246	0.140162	0.711012	0.511692	0.999571	0.320098	1.3629	0.427202	0.942554	0.549688	0.776586	2.47461	2.47659	1.92838	1.64884	2.34477	2.0172	1.6237	2.39142	1.67038	1.55808	2.75523	1.1674	1.87516	2.22921	2.12549	2.32555	1.96999	2.07223	1.74386	2.71725	2.93383	2.8636	2.3174	2.30668	2.22852
Arnt	ENSMUSG00000015522	-0.300265	1.11162	-0.620831	0.705875	0.941915	0.248154	0.82869	0.391994	0.999571	-0.745548	-0.863509	0.941123	0.926038	0.999931	0.611844	-1.36451	2.55295	-0.264578	0.288376	-0.663829	0.199289	-0.76143	-2.0088	1.72025	-1.17516	-3.54358	0.166039	-1.29922	-0.2285	-0.676593	2.2196	-2.4101	-0.71907	0.648815	-0.509212	1.31786	-0.0318751	-0.0355368	1.43716	1.26991
Mocs2	ENSMUSG00000015536	0.234725	-0.59358	-0.149401	0.65728	0.928733	0.639986	0.922883	0.840426	0.999571	-1.04895	0.198232	-0.84419	0.820604	0.999931	0.667532	-0.167702	2.33281	0.0354232	2.35744	-0.638016	1.658	-0.199767	0.478348	0.337238	0.499427	-3.12267	2.53366	0.925608	-0.378736	0.928471	0.653807	0.706228	2.0177	2.07505	2.55228	0.368843	1.01795	2.8827	-0.396293	0.488626
Nat9	ENSMUSG00000015542	0.164754	0.642569	-0.0991893	0.800876	0.960271	0.574421	0.91319	0.805424	0.999571	-0.439175	1.31467	1.14217	0.918254	0.673322	0.353192	-0.930486	-0.541292	-0.181841	-0.353096	-0.290104	0.296302	-1.82995	0.856347	0.111314	0.885711	0.014216	-3.06932	-1.59156	-3.11532	-1.47651	-1.8284	-1.79372	-1.78305	0.38947	-1.89852	2.19168	0.284297	0.407688	0.594269	-0.168554
Lpl	ENSMUSG00000015568	-0.213424	-0.251394	0.00139993	0.58942	0.906329	0.650926	0.925913	0.997439	0.999862	-0.429966	-0.612182	-0.825462	0.93977	0.999931	0.252299	0.605968	1.73006	1.8993	1.86109	1.20003	1.96254	1.50855	0.85891	1.31882	1.15304	1.89491	0.096479	2.32369	1.18142	0.819028	1.71126	0.205429	1.6279	0.685683	1.16574	0.492633	0.746677	1.41244	0.920554	1.88043
Atp6v0e	ENSMUSG00000015575	0.198353	0.288525	-0.489441	0.659805	0.929264	0.363628	0.862993	0.180901	0.867707	-0.54503	-1.58965	0.279291	0.796136	0.132772	0.81224	1.88445	1.78607	2.96875	1.59631	2.94558	2.49135	1.86211	3.03243	3.04804	1.85116	2.19442	0.976937	1.88925	2.39597	1.28964	1.51894	1.80362	2.36127	1.71008	1.76265	1.50177	1.75618	2.2115	2.48064	1.85817
Zfp318	ENSMUSG00000015597	0.48819	0.569297	0.120273	0.513888	0.877094	0.512237	0.896314	0.734563	0.999571	1.63188	0.215619	2.19334	0.121313	0.999931	1.85185e-05	-0.892885	-0.730519	-1.79859	1.06095	1.72084	1.63623	0.0592902	2.84406	1.00028	-1.35724	-0.918886	-3.09529	-1.54515	1.35313	-1.43264	1.2524	1.0038	1.4502	-0.624676	1.88806	0.662873	-1.78787	2.49572	2.71436	2.05636
Srf	ENSMUSG00000015605	-0.22146	0.23451	0.625316	0.744396	0.950167	0.857476	0.969144	0.309535	0.990028	1.5233	0.273495	-0.310666	0.59366	0.999931	0.858769	0.0473509	0.661702	-0.826137	0.123185	0.80255	0.70618	0.792691	0.665093	-0.578389	2.29635	1.55637	0.938164	1.53844	1.05533	1.56038	2.73916	0.140182	-1.1571	1.31466	-1.04818	-0.3916	1.45763	2.28687	1.1392	0.531056
Gata3	ENSMUSG00000015619	0.494501	1.11699	0.404139	0.444073	0.844644	0.288179	0.84205	0.620893	0.999571	-0.121213	-0.568343	-0.477691	0.984764	0.999931	0.669155	0.466769	-3.12171	-0.324301	0.174592	-1.06419	0.304495	0.0873892	-2.02821	0.818515	1.4929	-0.268428	-1.67908	-1.17598	-0.256291	-0.52594	-1.04916	-2.31957	2.16866	-0.622958	-1.24124	0.596655	-1.96916	0.502188	-1.51972	-0.344904
Lama5	ENSMUSG00000015647	1.18639	1.3389	0.873403	0.0757117	0.477327	0.138604	0.707863	0.0387589	0.499925	2.19378	0.651435	-1.64675	0.000309445	0.999931	0.290639	-3.48781	-2.9902	-2.78075	-1.35227	2.18577	0.741386	-0.989709	-2.26562	0.111753	1.49617	-0.803379	0.1092	1.34313	0.448687	-1.44569	1.66119	2.71124	-2.09441	-0.713924	0.12972	1.4526	-0.436157	0.785943	-2.1157	-0.469652
Steap2	ENSMUSG00000015653	-0.543916	1.26116	-0.275877	0.255825	0.73746	0.174613	0.759186	0.68001	0.999571	1.33746	-0.641994	-0.201595	0.680118	0.999931	0.898146	1.00958	-3.01377	-0.808357	-1.02831	0.706764	-0.344906	-1.30503	-0.150178	-0.319515	-0.467072	-2.69069	0.174517	-0.462729	1.8932	-0.629286	-0.812664	0.289721	-0.34862	-2.82719	-0.512681	-0.433257	-2.39622	0.471434	-0.846439	-0.123442
Hspa8	ENSMUSG00000015656	0.00469827	-0.678499	0.365153	0.986288	0.996117	0.284439	0.84198	0.149427	0.812232	0.276234	0.109919	-0.424549	0.923586	0.999931	0.505258	2.45415	2.5665	2.26021	2.42327	1.93319	2.55457	2.74783	2.43565	2.35603	2.37179	2.4339	2.94111	2.3032	2.63012	2.44166	3.12082	3.08399	2.54633	2.29997	2.62573	2.25909	2.87359	2.49041	2.36152	2.34281
Pdzd11	ENSMUSG00000015668	0.15038	-0.667876	0.320627	0.800336	0.96022	0.412687	0.87514	0.596075	0.999571	-0.206612	0.394309	1.21353	0.9585	0.999931	0.317526	-0.158832	-0.643675	-1.36805	-1.41188	1.05935	-0.308928	-0.218692	-3.01208	-3.56908	-0.237448	1.33562	-2.97475	-3.42018	-3.34975	0.210552	-0.117158	-0.180976	0.650917	-0.218102	1.2026	-1.1426	-2.26096	-2.70948	-0.437221	-0.905889
Psma2	ENSMUSG00000015671	-0.103006	-0.765632	-0.232282	0.69794	0.940291	0.261983	0.837285	0.418313	0.999571	-0.376903	-0.0655733	-0.294497	0.875027	0.999931	0.753912	2.16898	2.45938	2.70994	1.91771	1.14415	2.32494	2.93664	2.5861	1.60694	2.0746	1.97927	2.16217	2.28726	2.28052	2.14349	2.16315	1.85854	2.71264	2.08157	2.91187	1.50685	2.24866	2.80986	2.07883	2.56648
Mrpl32	ENSMUSG00000015672	0.485432	-0.994138	-0.648506	0.377348	0.814678	0.370762	0.863388	0.336769	0.999571	-0.679337	0.553084	-0.399027	0.93977	0.999931	0.735186	1.99357	1.55718	-2.65769	-0.354707	-1.73417	1.15353	1.19424	-2.15803	0.685754	1.11892	0.292303	-3.31219	-1.24342	-0.808412	-0.508757	1.52401	1.516	2.34199	0.792791	-0.172352	1.10341	0.889091	-0.159021	-1.56937	-0.372303
Setdb1	ENSMUSG00000015697	0.458786	-0.415325	-0.244441	0.438996	0.842687	0.750576	0.949522	0.774163	0.999571	0.340953	0.0699835	-1.22906	0.957281	0.999931	0.535518	-0.610271	1.95386	0.452774	1.27481	-0.232157	1.49183	1.82671	0.822595	0.989043	1.81833	0.79718	-0.63912	1.83557	1.63885	2.11731	-0.104986	0.859686	0.0176686	1.37815	0.248011	0.784663	1.36951	1.87393	-1.29436	0.868638
Anxa9	ENSMUSG00000015702	-0.887818	-0.370662	-0.255703	0.0873914	0.506555	0.736213	0.946444	0.658528	0.999571	-1.3364	-0.0987511	-0.574046	0.741128	0.999931	0.580971	-0.52608	-0.707373	1.42875	-0.992026	-2.22402	-3.70601	-0.26438	0.968897	-0.515435	0.468371	1.24542	-0.648631	-2.29232	-1.05025	-1.81922	-2.28085	-0.479981	1.26612	-0.914655	-0.916533	-0.448237	0.445521	-2.90012	-2.50425	-0.744419
Arnt2	ENSMUSG00000015709	1.48256	-0.58892	0.078245	6.21115e-06	0.00111759	0.300009	0.846056	0.821645	0.999571	0.408753	1.75674	0.546773	0.950205	0.376127	0.703535	-3.11924	-0.753525	0.765757	-0.321902	-2.61067	1.91737	0.0685235	0.448726	-2.40169	-1.72555	-3.30168	-0.380001	-2.11018	0.127791	-1.92528	-1.60574	-2.41502	2.86542	1.03654	0.491196	0.593394	0.486489	1.2419	1.54176	-1.73063
Cers2	ENSMUSG00000015714	0.127461	-1.23902	0.245601	0.678196	0.93269	0.208121	0.797336	0.529175	0.999571	0.00549531	0.0584361	-0.545724	0.998131	0.999931	0.65489	1.41416	2.15647	2.01996	2.05387	0.942184	2.68315	2.445	1.37733	1.152	1.52929	1.85927	2.56136	1.81598	2.65681	2.24797	2.49566	3.39933	2.46905	1.60153	1.35603	0.888876	2.08851	2.15587	1.8829	2.01336
Capza2	ENSMUSG00000015733	-0.861129	-0.277416	-0.190088	0.08341	0.498084	0.67307	0.931035	0.486914	0.999571	-0.448515	-0.287872	-0.294283	0.879092	0.999931	0.797945	2.59149	3.03124	2.90677	3.09045	1.18348	1.32985	2.35028	2.77864	0.863697	3.14335	2.44662	2.97436	1.75631	1.86229	3.02902	1.59251	1.72343	2.00384	2.19372	2.45787	1.49073	2.27361	2.54124	1.83775	2.0448
Plekho1	ENSMUSG00000015745	-0.756876	-0.522265	-0.356595	0.248496	0.732628	0.44536	0.882009	0.431397	0.999571	-0.650703	0.378729	0.6263	0.746667	0.999931	0.437057	2.1595	1.89632	2.01524	1.5571	1.25034	1.04497	1.49666	2.26721	1.6526	1.17625	1.0489	2.0288	1.75572	1.82252	0.796773	1.95709	1.81366	2.03786	1.39004	1.90257	1.81318	1.69207	1.93791	2.25983	2.2784
Vps45	ENSMUSG00000015747	0.436255	-0.0908919	0.566501	0.559373	0.893989	0.934506	0.983328	0.386217	0.999571	-0.575568	1.16075	-0.502961	0.923641	0.810773	0.674797	-0.675698	0.297925	0.271842	-1.40177	-3.29039	-1.10589	0.822926	-1.86842	-0.0284019	-0.957538	0.158896	-0.0574761	-0.851513	-0.416233	-0.143248	-0.61749	-2.11624	2.38429	-0.985827	0.131139	2.25652	0.308812	2.59515	-1.24378	-0.333279
Anp32e	ENSMUSG00000015749	0.177736	-0.832252	0.481107	0.66308	0.929947	0.352789	0.857856	0.165511	0.839182	0.284455	0.0454032	-0.436784	0.948752	0.999931	0.676431	2.71326	2.85928	1.30552	1.54063	3.92846	2.56578	2.76346	1.09824	2.10973	2.50914	3.24482	1.77937	2.36243	1.38362	2.18527	3.0953	4.21173	2.16566	2.70051	2.04787	1.67963	1.17454	0.759887	2.14953	2.66026
Aph1a	ENSMUSG00000015750	-0.0269012	-0.156933	-0.0316183	0.932947	0.987589	0.674753	0.931175	0.923657	0.999571	-0.817676	-0.270313	-0.772586	0.802362	0.999931	0.425374	1.92439	2.73131	2.36081	0.194983	1.36495	1.7977	1.57184	-2.3308	1.77715	2.75266	1.84755	1.07161	3.30353	1.21002	2.13019	-0.592248	-0.0368483	2.8304	1.56751	0.900166	2.31006	1.85971	1.61811	0.960409	1.32504
Tab2	ENSMUSG00000015755	-0.0523162	-1.70716	-0.847264	0.912691	0.984529	0.00342928	0.0776876	0.19174	0.89116	-0.284377	2.76544	-0.308619	0.949081	0.00247294	0.87403	2.00096	2.05642	1.7196	1.54297	1.62727	1.72593	1.94747	1.93643	0.257701	2.43998	0.318293	0.550931	1.85619	1.83173	0.466853	1.66229	1.664	1.69522	1.71334	1.29252	2.22189	0.546283	2.14195	1.55201	1.96603
Ppil4	ENSMUSG00000015757	-0.139477	2.86422	0.356543	0.821436	0.965638	7.44018e-08	1.04625e-05	0.640652	0.999571	1.95092	-1.1447	0.892644	0.0247457	0.145422	0.288359	0.0467961	-2.97536	-0.301419	0.323479	1.20702	-0.184967	0.995434	0.918418	2.1238	2.49223	0.0716954	0.234426	0.631279	1.96955	-1.96898	0.369993	0.494996	1.14264	-0.271583	1.22163	0.099737	-0.277993	0.911615	1.75362	-0.385322
Cnih1	ENSMUSG00000015759	0.113633	-0.922284	-0.571527	0.792489	0.957791	0.333181	0.851538	0.0775961	0.670233	-0.362941	0.0555537	0.833029	0.920074	0.999931	0.642147	1.1113	1.61309	2.64998	1.1123	0.608448	2.27737	1.43195	0.709176	1.43377	1.48841	2.33503	1.53006	-0.341625	1.94155	2.36385	2.00684	1.50431	2.34563	0.807224	1.25519	1.35951	2.67586	2.53758	1.96049	0.849188
Eps8	ENSMUSG00000015766	0.0177233	0.334953	0.768583	0.977001	0.99501	0.776296	0.955537	0.291534	0.978766	0.704713	0.572522	-1.56753	0.896785	0.999931	0.367449	0.0278502	-3.26624	-0.0170986	-1.10154	1.40596	-0.874541	-1.56146	1.1505	-0.24345	-0.894539	0.83792	-0.813352	0.796849	0.710884	-1.43121	-0.594525	1.73783	-0.131506	-1.11344	-0.471411	0.522807	0.0425852	-2.78652	-2.07506	1.10614
Med22	ENSMUSG00000015776	0.654138	-0.277816	0.306783	0.150914	0.629654	0.710491	0.939883	0.563025	0.999571	-0.168333	-1.0689	0.080506	0.974377	0.946208	0.969882	-0.9697	0.263552	1.75997	-0.678203	-0.0195448	1.32249	-0.341985	-2.27016	1.09361	-1.67942	-1.22197	0.203988	-1.17836	1.48399	-0.658169	1.69794	-2.08118	1.97162	-0.762189	-0.410152	0.364612	0.389591	-0.767323	1.04401	-0.107293
Surf1	ENSMUSG00000015790	0.0557363	-0.718033	0.236512	0.925228	0.98625	0.550758	0.906478	0.769219	0.999571	0.212004	2.50547	0.504277	0.978571	0.18625	0.747069	-0.526085	1.7746	-0.52211	0.0559689	0.749739	1.05612	-1.73434	-2.82655	-0.123746	1.06873	1.23944	-0.763268	1.05685	0.964941	1.29618	-1.7224	0.516533	1.72979	1.81533	0.0641603	2.71045	3.04216	1.36689	1.57143	0.731604
Med28	ENSMUSG00000015804	-0.46009	-0.611305	-0.831275	0.527296	0.882219	0.401761	0.869013	0.0119312	0.26106	-1.15932	0.205122	0.652235	0.653405	0.999931	0.698764	2.16419	2.5523	2.19284	1.27286	1.99053	0.908886	1.23243	1.10015	1.79886	2.85104	2.01221	1.60089	0.41822	1.48003	2.20894	0.871895	1.40836	2.24216	0.991848	2.14835	1.84564	1.51002	2.35812	1.81425	1.95748
Qdpr	ENSMUSG00000015806	0.612176	-1.72763	-0.386525	0.203733	0.694633	0.0106225	0.168253	0.658938	0.999571	0.361078	1.61649	0.466393	0.950484	0.531675	0.846312	2.08615	0.735219	1.4118	0.90469	-2.22694	2.14904	3.3243	2.85833	-1.30487	1.83637	-0.847498	2.43888	-0.762561	1.40208	-0.417411	1.89352	2.0146	2.85342	1.41048	1.26981	1.59798	1.69358	1.83622	2.47575	0.207975
Sqstm1	ENSMUSG00000015837	0.531059	-0.467382	0.756617	0.291186	0.768049	0.630563	0.921059	0.11868	0.761546	0.528457	1.50628	-0.0376511	0.911417	0.421785	0.95581	1.52089	1.65342	1.79378	1.74909	2.16589	2.22062	2.26896	2.28134	1.73326	2.09777	2.48429	2.39805	2.15455	2.34592	1.74384	2.07019	1.98083	2.40643	2.41733	2.30916	2.74293	2.27659	2.2501	2.38448	2.16803
Nfe2l2	ENSMUSG00000015839	-0.51839	-0.0870417	-0.234883	0.294686	0.768891	0.791068	0.958728	0.466464	0.999571	-0.581265	-0.0255285	-0.475375	0.875027	0.999931	0.586278	2.46699	2.54774	2.83307	2.06754	2.63622	0.95151	1.85742	2.12568	2.39026	1.81539	1.80535	2.16802	1.94907	1.45727	1.87799	1.90873	3.1644	3.38591	2.76581	3.00897	2.35281	2.00003	2.11656	1.3868	2.07416
Rxrg	ENSMUSG00000015843	0.159816	0.26396	0.1908	0.828916	0.96753	0.827411	0.965194	0.810951	0.999571	-0.83235	-0.641719	-0.277776	0.880482	0.999931	0.807134	1.14079	0.968478	-1.7272	-0.123321	2.36315	1.61375	-1.17389	-3.4326	-0.914501	1.07947	1.66614	0.0291663	0.253295	-3.01774	0.679098	0.75487	0.541993	-2.32202	-3.05402	-0.959651	-0.955786	-1.28108	-2.63332	-0.20808	-1.62122
Rxra	ENSMUSG00000015846	0.722024	-0.690876	0.155077	0.204399	0.695248	0.5657	0.91108	0.847336	0.999571	0.117524	0.19843	0.392004	0.982451	0.999931	0.852893	-1.05053	1.78381	1.40004	-0.514542	1.71231	1.19397	0.165765	-2.1738	1.41678	2.02657	0.501563	1.84699	-1.33109	1.74668	3.45888	-0.0521814	1.22414	-0.037824	1.54894	0.470973	1.53265	2.3597	0.697758	2.06353	0.908478
Adamtsl4	ENSMUSG00000015850	0.986948	-0.611476	0.284138	0.135579	0.609892	0.3165	0.848183	0.603292	0.999571	1.61718	1.24424	-0.466498	0.212629	0.784141	0.81638	-0.643397	-2.99503	-0.291543	-0.490693	-0.137242	0.964176	-0.298727	0.768428	-2.02294	-2.0841	-0.725406	0.127183	0.500182	1.37193	-1.83598	1.08379	2.09782	0.456082	-0.738304	-0.0514701	-0.246956	0.223753	-0.767474	0.950421	-0.281812
Fcrls	ENSMUSG00000015852	-1.78621	-2.37272	-0.372962	0.00224278	0.06952	7.8157e-06	0.000574031	0.44414	0.999571	-0.966598	2.96983	0.0672662	0.834588	0.00247294	0.960269	2.09388	2.4134	1.37391	1.77773	0.627776	-0.185938	1.32415	1.13811	-0.304901	1.76132	1.20688	1.44081	1.57552	0.719377	0.000442281	1.47101	1.18622	1.58627	0.925124	0.858927	1.99634	0.570251	1.44168	1.72389	1.29122
Prpsap1	ENSMUSG00000015869	-1.12362	1.86244	0.856118	0.0041861	0.0975393	0.00268905	0.0632804	0.225429	0.929961	-0.0346381	-1.47711	-0.369009	0.993765	0.678286	0.803005	-1.24186	-0.83922	-0.830459	0.621552	-0.740494	-3.62534	-1.49618	-2.0126	0.609336	1.15697	1.68386	-3.40665	-2.17567	-0.924384	-1.54888	-1.65014	-0.105304	1.74201	-3.35714	-1.3988	-0.16307	-2.84143	1.78542	-2.51939	-0.412265
Fam184b	ENSMUSG00000015879	0.488944	-0.256127	-0.322248	0.440753	0.842774	0.83228	0.965989	0.428309	0.999571	0.496826	-0.0174728	-0.246203	0.949635	0.999931	0.782747	-1.0253	0.596702	-0.519293	-1.14809	-2.43643	0.041108	-0.347582	-2.67809	0.158279	-1.86798	-0.815072	-3.11743	-2.47377	1.14148	1.46422	-1.68219	-2.95802	1.53896	-0.7185	-0.859416	0.405542	0.909286	-0.570894	-2.60023	-1.91256
Lcorl	ENSMUSG00000015882	0.325616	0.4932	-0.524342	0.601558	0.908723	0.695974	0.934913	0.474028	0.999571	-0.348465	-0.0847893	0.621109	0.956152	0.999931	0.671322	1.02049	-0.361088	0.176998	0.739322	0.559705	1.43285	0.485555	1.2949	0.205164	1.59138	-0.964873	-0.180119	-1.01665	-1.01225	-0.847499	0.59212	1.10234	1.45339	1.14173	1.47884	0.0724818	0.283319	-0.18567	0.728406	-0.304995
Lta4h	ENSMUSG00000015889	0.188735	-0.943634	-0.427043	0.793476	0.957791	0.206348	0.797336	0.618554	0.999571	0.721324	1.58441	-0.361985	0.925943	0.491285	0.788078	1.38093	0.727564	-1.34563	0.763417	-0.102572	0.476601	2.19843	1.23344	-1.11654	-0.314592	0.586135	-3.33363	-0.16943	1.16988	0.405555	2.34437	1.43454	0.249376	1.44389	0.357972	1.17914	-0.647093	-0.525712	-0.466307	1.9261
Dstn	ENSMUSG00000015932	-0.116351	-0.980097	0.715602	0.864918	0.97317	0.419071	0.877245	0.251104	0.952284	0.509483	0.165032	1.38463	0.933983	0.999931	0.256701	0.472572	2.1864	1.52326	1.96518	1.00908	1.40723	1.59817	2.91481	1.693	0.362568	2.41085	2.30994	0.211226	2.11254	2.02499	2.03329	3.06555	2.01406	1.81755	1.63408	1.48445	2.62432	1.99998	2.26962	1.76035
H2afy	ENSMUSG00000015937	-0.517154	-0.568061	-0.0404517	0.362598	0.807586	0.40349	0.869886	0.86703	0.999571	-0.426279	1.255	-0.363471	0.875027	0.725395	0.684006	2.56369	2.46944	3.41551	2.14938	1.45541	0.885535	2.7297	3.00054	1.48544	2.40894	2.76681	2.66216	2.0239	2.24957	2.66811	1.51702	1.79513	2.14391	2.10409	1.82468	2.39279	1.74377	2.37624	1.7278	2.97506
Gtf2ird2	ENSMUSG00000015942	-0.328458	-0.302703	0.916464	0.657354	0.928733	0.799074	0.959462	0.192273	0.892194	1.16266	-0.184786	-0.855275	0.810212	0.999931	0.41469	1.2577	-0.499568	0.36069	-0.420998	1.76136	-0.418478	-1.53514	-2.25886	0.689339	-1.58727	0.555706	1.77216	-1.37654	0.762248	-0.75258	2.99398	0.953858	2.16756	-3.64606	-0.00577987	0.535409	-0.93284	-2.89715	-1.65972	0.173374
Bola1	ENSMUSG00000015943	0.903736	-0.205366	1.38702	0.126117	0.59491	0.72646	0.944462	0.0397732	0.507328	0.725999	1.17769	-1.65562	0.775399	0.886072	0.32312	0.869276	-3.10665	-1.85767	0.987544	0.576015	1.62323	1.72401	0.522594	-2.02239	0.219632	2.08454	0.1054	0.913098	-0.632698	0.988083	0.834286	1.19544	0.590574	2.14524	0.620342	-2.03953	-0.993669	-2.50772	-2.35037	-1.39296
Castor2	ENSMUSG00000015944	0.279636	-1.51238	-0.83255	0.586879	0.905178	0.154983	0.732963	0.0833028	0.683464	-0.512082	-0.761217	2.31059	0.948707	0.999931	5.06281e-07	0.219181	1.94273	0.943711	-0.340909	-2.34875	1.63046	-1.85092	-2.66626	0.42275	-1.96113	-1.2156	-3.12013	-1.99693	0.712579	1.98381	0.78308	-2.51187	-1.45881	0.100581	-0.649164	-2.51618	3.11541	0.667975	2.64939	0.128866
Fcgr1	ENSMUSG00000015947	-1.62851	-0.773953	-0.123187	0.0130248	0.18868	0.298882	0.846056	0.632532	0.999571	-1.36275	0.151545	-0.870928	0.575742	0.999931	0.382841	1.88269	2.55417	3.13088	2.64051	0.64855	0.0353086	0.931557	2.4611	0.817599	1.70922	2.68503	2.65276	1.69148	0.0589131	1.50722	1.41683	1.52561	1.81324	1.57377	2.0076	0.915086	2.38538	1.57353	1.03866	1.57448
Ncf1	ENSMUSG00000015950	-0.366056	-0.896803	-0.424523	0.472255	0.857802	0.258548	0.833395	0.122261	0.770375	-0.703059	0.792303	-0.683978	0.788678	0.999931	0.428777	2.19514	2.26632	3.13011	0.967481	1.09215	1.57308	1.65716	0.861241	1.38492	1.40628	2.02951	2.51498	2.13511	1.52405	2.37862	1.7276	1.78254	1.97261	2.18157	1.46536	1.87449	2.65752	1.89422	1.50927	2.10042
Adss	ENSMUSG00000015961	-0.0915872	1.04078	-0.0619403	0.880128	0.975137	0.153405	0.732101	0.936149	0.999571	1.02143	-1.77689	-0.0829393	0.79597	0.251676	0.975307	2.07298	0.844105	-1.28569	-0.466908	-2.17279	1.05066	0.562713	-2.759	1.55227	0.734299	1.0914	-0.237292	0.306297	1.52654	0.565175	1.79366	-0.182417	-0.176305	-3.38871	-1.37455	-0.746377	1.23544	-0.429812	-0.267438	0.340916
Chdh	ENSMUSG00000015970	-0.491009	0.374876	0.543948	0.310961	0.776061	0.564601	0.91108	0.0603769	0.604979	0.280948	0.963059	-0.337805	0.926038	0.999931	0.692537	-1.10696	-2.80543	-1.94474	0.43733	-1.17378	-0.225899	-0.769975	0.830934	-1.84151	0.475816	-0.380342	-0.662325	-1.60049	-2.76864	-1.48358	-2.46778	-1.87146	0.035001	-2.77316	0.442597	0.0140867	-1.98938	-1.17429	-1.72418	-1.48152
Actr8	ENSMUSG00000015971	-1.65458	0.48808	-0.942978	0.000685622	0.0334372	0.481524	0.889313	0.108159	0.736257	-0.384999	-0.708586	-0.0913433	0.951016	0.75292	0.964365	2.40179	1.7219	0.118515	1.03619	0.543253	-0.592428	0.862314	0.771966	1.47817	0.713598	-0.225823	0.220474	0.784155	1.08674	0.867466	0.618387	0.354114	1.61269	1.23498	2.4753	-0.227228	0.694262	0.15821	0.583297	1.37751
Stk32c	ENSMUSG00000015981	0.617884	1.22161	-0.309112	0.32796	0.789474	0.185687	0.772922	0.675385	0.999571	0.816369	-0.97171	-0.427519	0.907978	0.600632	0.734018	0.954019	0.549264	0.980019	0.800115	0.545672	1.56125	1.13962	2.2177	1.90673	0.95778	0.925213	-0.510895	0.111925	1.51805	0.238325	2.28148	-0.0984958	1.2557	0.99925	1.55855	1.01853	1.63093	1.71476	0.0564091	0.473546
Fnta	ENSMUSG00000015994	0.105684	-0.847277	0.64105	0.882583	0.975674	0.494846	0.892478	0.278205	0.974992	0.126786	-0.0158678	-0.704208	0.983308	0.999931	0.601453	1.09168	1.82894	0.962335	0.984068	1.58328	1.83575	0.304692	-2.91332	1.20255	0.0804804	2.32447	2.11413	2.3662	1.56408	2.22063	1.01285	-1.89638	2.78014	0.778605	1.3438	1.53786	1.48154	0.761315	1.86065	0.755828
Skiv2l2	ENSMUSG00000016018	-0.000823057	-0.758787	1.29828	0.999026	0.999732	0.519497	0.898027	0.0134678	0.278811	0.938412	1.17944	-0.629521	0.873021	0.902902	0.685395	-0.515407	-0.415869	2.11951	1.40605	-0.434079	0.8406	0.351291	1.00981	-1.87917	1.10745	2.24752	2.12463	1.88833	1.66645	-1.0616	1.04773	1.41072	1.37983	-3.00069	0.891695	0.771135	1.78538	1.9941	1.75544	-0.601806
Lbp	ENSMUSG00000016024	-1.53575	1.22333	-0.986563	0.00227854	0.0700385	0.159222	0.737648	0.140601	0.804183	-1.18592	-1.79675	0.12349	0.767574	0.288136	0.950517	-0.169071	1.87611	-0.0592163	1.72401	1.23362	-2.82267	-2.80999	2.43794	1.72903	-0.152111	-0.277617	-2.80805	-0.258009	-2.86158	-4.06581	-0.390134	0.158416	-0.281699	-0.46154	-0.387085	-0.517572	-0.611064	-0.472431	-0.442514	-0.937855
Fli1	ENSMUSG00000016087	0.167308	-0.625252	0.771583	0.78089	0.955175	0.551785	0.906658	0.0563961	0.585911	0.134048	0.205839	-0.896084	0.980672	0.999931	0.0313265	2.00036	1.89515	1.42617	1.34889	1.77074	1.44908	2.35414	1.0132	1.52682	1.87966	2.21179	2.7791	2.90925	1.8791	1.61128	1.58541	2.13	2.04188	1.52215	1.54821	1.58808	1.00367	1.87222	1.93635	2.28032
Stard13	ENSMUSG00000016128	1.1216	-0.270483	0.274775	0.0119664	0.179668	0.722941	0.943633	0.559157	0.999571	0.93515	2.1103	-0.355524	0.827779	0.183639	0.704941	-0.835847	-3.36429	-0.702642	0.195201	-1.63521	0.595525	-1.37834	-2.26499	-2.70291	1.04762	-1.0923	-0.947214	-1.63199	-0.306534	-0.954262	-1.15474	0.0254734	2.22395	-0.438744	-1.02623	0.983653	-0.434087	0.527829	-1.92251	-1.65263
Tenm1	ENSMUSG00000016150	1.11033	1.77818	0.785268	0.031161	0.306308	0.00763123	0.136006	0.323623	0.993814	0.608301	-1.74243	-1.99935	0.942554	0.373402	0.154117	-1.66538	-3.1575	-0.507937	-1.80067	0.595708	0.492396	-1.20673	-2.38973	0.34242	-2.18433	-0.217341	-3.23817	0.706451	-0.893831	-2.35239	1.61277	-3.61032	-1.63039	-3.40847	-0.485132	-1.73999	-2.07656	-3.03755	-3.04097	-0.42936
Diexf	ENSMUSG00000016181	0.907261	1.03267	-0.60829	0.0911234	0.515552	0.234077	0.82129	0.393103	0.999571	0.500444	-1.35436	-0.373667	0.950205	0.598082	0.751109	0.203655	0.0700108	-0.444988	-0.643785	-0.907432	1.14434	1.77237	-1.96625	1.05904	2.20414	0.228451	-0.967827	-1.05544	0.453924	-0.447966	1.5529	1.02053	1.34081	-3.25388	-0.133979	0.173805	-1.15546	1.46961	-1.40729	-0.206419
Hsd11b1	ENSMUSG00000016194	-0.432302	2.06462	-0.163001	0.174021	0.663062	0.000150002	0.00617739	0.65408	0.999571	-0.0446178	-1.40448	-0.230904	0.992158	0.66252	0.848356	-1.08805	-2.94646	0.0658038	-1.11142	-0.463812	-3.18792	-3.47342	-2.39388	1.6178	0.0984763	-0.63626	-3.26133	-1.99565	-0.919672	-1.67869	0.324491	-2.5873	-2.90557	-3.05228	-2.72898	0.327233	-1.64462	2.07143	-2.19551	-1.02558
H2-M3	ENSMUSG00000016206	-0.837998	-1.09529	-0.452098	0.203074	0.694233	0.201912	0.795365	0.218625	0.929417	-1.11535	2.29584	0.457057	0.706708	0.305092	0.792206	1.4845	2.19225	2.9383	0.359444	1.71032	0.0168866	2.13588	3.01371	1.42743	1.59417	2.41247	0.699602	1.55097	1.62117	1.8319	-0.184396	1.80279	1.50673	2.52387	1.44455	3.378	1.91081	2.40105	1.49077	2.1787
Atp5e	ENSMUSG00000016252	-0.14557	-0.349483	0.0630397	0.497721	0.869829	0.48052	0.889313	0.727693	0.999571	-0.355045	0.528199	-0.276233	0.855379	0.947069	0.639149	2.53895	2.75713	2.81987	2.58478	2.9035	2.51248	2.58774	2.80119	2.63666	3.176	3.01401	2.72698	2.89946	2.74806	2.22979	2.61239	2.68393	2.70137	2.1695	2.91044	2.91914	2.87365	2.74	2.7902	2.62757
Nelfcd	ENSMUSG00000016253	0.421262	-1.1231	-0.344389	0.569558	0.897246	0.301902	0.846056	0.628805	0.999571	-0.239784	0.693792	0.622599	0.978629	0.999931	0.685266	1.76827	-3.01543	0.424792	-2.70505	-3.1603	0.295303	1.06131	-2.57978	-2.28543	0.82149	-0.151488	-0.23259	-1.85477	0.0641826	2.12882	-1.88419	-2.31433	-1.8381	-0.94652	-2.50346	0.0578671	-0.228266	-0.983407	0.440128	-0.0105141
Ctsz	ENSMUSG00000016256	-0.259568	-0.174662	0.0115184	0.328149	0.789474	0.6141	0.918996	0.954342	0.999571	-0.360399	-0.0839955	-0.376512	0.861612	0.999931	0.606521	2.99689	3.17793	2.93025	2.73165	2.92884	2.55607	2.75777	3.43612	3.2137	2.53147	2.97972	2.8821	2.31715	2.78166	3.68487	2.14942	2.40573	2.46716	2.98563	3.07063	2.84945	3.30832	1.82	2.44215	2.83968
Prelid3b	ENSMUSG00000016257	-0.0519444	0.350028	0.182769	0.936351	0.988263	0.780315	0.956914	0.825188	0.999571	1.51381	0.462732	0.0697489	0.634489	0.999931	0.97319	0.628391	-0.0108876	-0.0250587	1.76797	1.86913	1.62829	1.09292	2.04349	-0.323191	0.0624541	1.00723	0.213218	0.221235	1.09256	0.736158	1.89935	0.947483	-0.863507	0.243174	0.72043	0.122473	0.972408	-3.2216	0.694878	-0.844013
H2-M2	ENSMUSG00000016283	0.55473	0.203275	1.05317	0.38113	0.815438	0.856601	0.969005	0.0690573	0.640402	-0.298682	0.236234	-1.89922	0.970882	0.999931	0.00742844	2.38768	0.049422	1.67691	0.838181	2.2798	2.21089	0.456504	1.33861	1.95551	1.26505	1.43484	2.40564	2.45625	0.230465	2.56388	1.26022	2.21972	1.24684	2.24477	2.12556	1.90364	2.20858	0.848593	-0.851759	1.8741
Slc25a5	ENSMUSG00000016319	-0.181839	-0.71299	0.00931217	0.377453	0.814753	0.247041	0.827127	0.961832	0.999571	-0.15709	0.638649	-0.452172	0.943372	0.996742	0.356446	2.5424	2.89344	3.32101	2.81132	2.23145	2.59208	2.99499	2.31261	2.05265	2.52772	2.44809	3.23787	2.87512	2.67675	2.97672	3.21495	2.75126	2.84133	3.11696	2.62772	2.6742	2.44364	3.18144	2.54981	3.24463
Kcnq2	ENSMUSG00000016346	0.931927	0.320452	-0.254954	0.110163	0.560862	0.778019	0.956251	0.576613	0.999571	1.17544	1.52621	1.3788	0.758742	0.690859	0.234792	-0.165795	-0.541888	0.789141	-0.164702	0.400784	1.26172	0.647134	2.5331	0.500734	0.095658	-3.20964	-0.423881	-2.00963	1.52214	-1.92024	2.83699	2.04673	0.807828	0.427868	0.813565	2.17137	0.200119	1.96799	0.86915	-0.000135942
Eef1a2	ENSMUSG00000016349	0.491397	-0.346725	0.357149	0.467478	0.853465	0.765953	0.953246	0.667413	0.999571	1.12179	1.82148	2.06719	0.833305	0.531702	0.00331339	-0.865408	1.34538	0.690328	1.74927	1.2346	1.7963	1.06391	2.23759	0.902558	0.747387	1.07338	0.781926	-0.294908	1.52908	-0.177681	2.13942	1.2375	1.54635	0.751932	0.781313	1.81565	0.718955	1.32054	2.12735	1.7446
Pls3	ENSMUSG00000016382	-0.168524	0.145322	0.507733	0.73497	0.949504	0.897445	0.976852	0.148858	0.810826	1.08561	1.30833	-0.62937	0.760788	0.776148	0.61525	2.04674	0.415647	0.682058	3.22328	0.235583	1.82089	1.73543	2.70927	0.864235	2.13102	1.00926	2.53261	1.86966	2.56515	1.85846	1.19851	1.52083	2.24089	1.62122	1.24675	2.39939	1.14633	3.05212	1.57109	2.36246
Mpped2	ENSMUSG00000016386	0.325787	0.717944	0.0347264	0.563635	0.895678	0.346079	0.855408	0.967644	0.999571	-1.05105	0.0964833	-0.0453373	0.83871	0.999931	0.971565	0.535687	-0.0310351	0.830943	0.192792	0.130422	1.77541	0.0395189	0.7929	1.04288	1.13275	0.0377704	0.544265	0.941542	-0.789117	1.08671	-1.58043	0.704145	1.23526	2.42787	0.60024	1.23928	1.39623	2.27494	0.919216	1.01389
Nkap	ENSMUSG00000016409	0.93153	0.6553	-0.270921	0.04976	0.387168	0.502728	0.893341	0.55117	0.999571	-1.18702	-1.33006	-0.448071	0.704886	0.767069	0.692537	-1.18663	1.96188	-0.572356	-1.77485	-2.64028	1.20349	-0.946602	-2.67905	0.180042	0.0789632	1.23363	-3.12197	-3.25587	-3.35895	2.65489	-2.63213	-3.69972	-2.43352	-3.26163	-1.52815	-0.761028	1.39383	-2.97342	-3.37729	-1.1057
Ndufa1	ENSMUSG00000016427	-0.102641	0.0662617	0.00564778	0.66517	0.930502	0.843738	0.967109	0.979709	0.999589	-0.296631	0.2496	-0.408753	0.898601	0.999931	0.529008	2.81075	2.64605	2.85123	2.59354	3.12845	2.58823	2.59047	3.19081	2.94869	2.51328	2.5834	2.77507	2.90014	2.79242	2.3015	2.83228	3.02808	2.67193	2.70174	2.76145	2.998	2.74369	2.51119	2.81442	2.80467
Cr1l	ENSMUSG00000016481	0.405799	1.19964	-0.805058	0.429518	0.836827	0.0265991	0.300995	0.241825	0.945896	0.20062	-1.24534	0.361872	0.972444	0.379193	0.842249	2.1069	1.6919	0.26449	0.425549	2.02867	1.94747	1.27904	0.16093	3.45462	3.19988	0.875879	-2.96426	1.77941	1.76661	0.581325	0.77728	0.971367	1.14586	1.95184	0.345025	2.14937	0.884778	3.20839	1.09033	1.73571
Ppfibp1	ENSMUSG00000016487	0.94933	1.65284	0.0412653	0.100481	0.539251	0.0417928	0.396962	0.957466	0.999571	1.27537	-1.58331	0.30804	0.707109	0.135412	0.875182	0.13648	2.17022	0.808314	0.229653	2.53893	1.98367	2.27472	2.31338	3.89089	1.12657	2.83391	-2.8665	0.964105	1.9154	0.389714	2.69874	2.18311	0.39786	1.09072	1.44207	0.637506	1.92444	2.48145	0.989756	-0.0408594
Cd46	ENSMUSG00000016493	-0.142777	-0.670476	-0.865855	0.853641	0.97146	0.570923	0.912195	0.0981683	0.715961	-0.650861	1.07521	-0.204018	0.933031	0.971286	0.821351	-0.397027	-0.338252	-0.700802	-0.626152	-2.01149	-0.0872692	-2.31629	-2.34682	-3.23086	1.43415	-3.86629	-3.24203	-2.32249	-1.08252	-1.75164	-2.5871	-0.265441	0.599051	-0.839848	-1.1364	-0.589657	-0.0325531	-2.85833	-2.5755	-0.793126
Cd34	ENSMUSG00000016494	-0.113744	0.421325	0.104618	0.851681	0.97146	0.375577	0.865254	0.831586	0.999571	-0.104005	-0.705702	-0.585656	0.981427	0.959568	0.70199	1.01714	2.06702	1.43633	0.740821	2.67351	0.85023	1.30796	-2.10024	2.73724	4.0497	1.23254	1.87418	2.52646	1.42986	-0.592832	2.33381	1.41073	2.37599	1.48972	0.947777	2.21329	1.03892	1.93299	1.86705	0.603088
Plgrkt	ENSMUSG00000016495	-0.160064	0.0592154	0.281629	0.824769	0.966702	0.959265	0.988257	0.734132	0.999571	1.477	0.581531	0.401536	0.566911	0.999931	0.451354	-0.364863	0.0202069	0.0471725	1.91136	0.113311	1.29786	0.367209	0.578096	0.159469	-1.2645	1.22183	-0.418405	2.15527	1.78921	0.581124	1.07989	0.681894	1.26166	1.98519	0.460619	-0.0926234	0.820016	2.3453	2.56001	1.84752
Cd274	ENSMUSG00000016496	0.066433	-0.411345	0.729133	0.919648	0.985904	0.744304	0.948455	0.183224	0.874847	-0.0950569	0.0647587	-0.737116	0.990148	0.999931	0.581932	0.97774	1.34561	0.747861	1.28838	1.33274	1.32477	1.4346	0.878285	0.929326	1.25074	1.55441	2.07359	1.64268	0.694307	1.731	1.17216	1.83764	1.57625	1.79573	2.09269	0.874328	1.16646	1.15759	1.20324	2.00815
Mapkapk2	ENSMUSG00000016528	-0.100125	-0.641251	-1.01805	0.704315	0.941719	0.386902	0.865974	0.00664163	0.194872	-0.541883	0.332639	1.45573	0.85745	0.999931	0.0945525	2.54243	2.30373	2.65183	1.88812	1.38007	2.34998	2.18477	2.64722	1.8972	1.98214	0.856965	0.494043	0.658853	1.85059	2.52522	1.90025	2.14662	2.04378	2.46113	1.85701	1.8933	2.42814	2.34915	2.31889	2.32943
Lamp2	ENSMUSG00000016534	-0.0130306	-1.4015	-0.401301	0.969093	0.99501	0.0875504	0.584112	0.155614	0.821231	-0.53243	0.372883	1.31796	0.880749	0.999931	0.207584	2.56376	2.53351	2.29745	1.64976	1.22124	2.24665	2.39356	2.39902	1.88767	1.92808	2.20818	1.46135	0.941395	1.56802	2.5586	2.0681	2.10882	2.50394	2.58755	2.43011	2.20477	2.51122	2.69715	2.44163	2.68785
Atxn10	ENSMUSG00000016541	0.831366	-0.856203	0.319973	0.0849307	0.500679	0.48604	0.890264	0.640864	0.999571	0.669157	0.121324	-1.09279	0.89041	0.999931	0.486181	-0.626591	2.06	1.18348	0.424477	2.05071	2.10552	0.885217	-2.81775	0.974531	0.320424	2.04013	0.23712	2.20277	2.17902	2.54614	2.06892	1.54902	2.49483	1.37582	1.26367	1.04901	1.89762	0.881525	-2.24134	-0.330095
Foxred2	ENSMUSG00000016552	-0.382317	-0.0772707	1.1202	0.562515	0.895298	0.914975	0.978526	0.124001	0.775833	1.41147	1.30194	-0.859521	0.502108	0.764855	0.660857	1.14683	-3.27035	-2.22314	-0.0524931	-2.04786	-0.675987	-1.16149	-2.34627	-2.0333	1.3311	1.13929	-0.249688	2.79576	0.856061	-0.565231	-1.79662	1.23343	2.4041	0.885767	0.0630236	0.831506	1.14832	2.29701	-1.38372	0.376486
Eif3d	ENSMUSG00000016554	0.00770444	-0.924679	-0.620522	0.991406	0.997346	0.357307	0.85925	0.390752	0.999571	-0.738706	0.0460472	0.799197	0.825165	0.999931	0.678861	-0.0323578	1.36324	2.24075	0.821984	0.157251	0.80971	1.23201	2.70897	1.24079	0.602601	0.33419	1.69528	-0.10395	1.53554	0.0249387	1.96447	1.29268	1.30123	1.35523	1.23488	0.996875	1.88185	1.52977	1.56476	1.44
H3f3b	ENSMUSG00000016559	-0.162638	0.0610234	0.0889726	0.267392	0.746743	0.804204	0.96072	0.508875	0.999571	0.0612708	0.149083	0.113203	0.972444	0.999931	0.743306	3.27782	2.86657	3.29978	3.32671	3.24653	3.03381	3.29366	3.45913	3.27439	3.43234	3.33093	2.95232	2.58378	2.92896	3.06242	3.48268	3.21184	3.18855	3.34326	3.28763	3.34634	3.12884	3.29054	3.45282	2.99313
Nup50	ENSMUSG00000016619	1.19301	1.38183	0.523878	0.0200298	0.242279	0.115484	0.665824	0.535812	0.999571	1.21471	-1.14161	-0.0172047	0.77795	0.791442	0.994232	1.02057	0.222207	0.425235	0.274328	0.919752	2.25886	2.22536	0.534441	1.841	1.19512	0.962511	0.65844	1.29916	2.11178	1.54683	1.21144	1.14166	1.02786	1.32798	0.733351	0.787295	0.831736	0.897494	1.31211	1.74793
Phf21b	ENSMUSG00000016624	-0.352879	-0.243822	-0.868112	0.638844	0.922403	0.726232	0.944462	0.0386596	0.499925	-1.75464	-1.60792	1.46195	0.429069	0.569834	0.161575	-1.09821	1.74985	1.65125	-1.3063	-0.0558404	-0.867754	-0.795534	-2.02955	0.930575	-1.26389	1.16904	-3.3934	-1.75941	0.0863959	-1.10706	-0.928073	-0.0266249	2.20172	-0.941852	-0.857745	-0.544313	0.616382	-0.748807	0.984418	0.0340217
Ift27	ENSMUSG00000016637	0.209147	-0.0485654	0.155432	0.571482	0.898532	0.963474	0.989122	0.802076	0.999571	1.04819	0.22565	-0.670073	0.785068	0.999931	0.603408	-3.85116	0.0631465	-0.0821491	-1.65004	1.50375	-1.40177	-0.436118	-1.7095	0.962668	-1.24846	-1.23259	1.41349	-1.16834	0.950742	-0.389773	2.01537	0.905696	-0.763733	1.83349	0.546637	0.567843	0.870344	-3.57137	-1.61091	0.838815
Pacsin2	ENSMUSG00000016664	-0.267295	-1.67598	-0.181652	0.611816	0.912167	0.080994	0.562277	0.640656	0.999571	-0.950925	0.495831	-0.328326	0.733979	0.999931	0.835816	1.76026	2.00577	2.38796	1.01103	2.47734	1.10415	1.08938	-2.27216	0.537405	1.97258	1.03045	2.33685	2.35748	0.634139	-0.859904	2.4081	1.05171	3.19635	1.1787	0.302939	0.834816	-0.570532	0.0814808	2.58322	1.50067
Cmah	ENSMUSG00000016756	0.441152	-0.629809	0.491278	0.366217	0.809347	0.453927	0.884759	0.288085	0.976917	-0.320084	1.05474	-1.28651	0.950205	0.847364	0.0480776	0.186458	1.97193	1.50606	1.26833	1.6123	2.28465	1.70202	1.9447	1.09046	0.954365	2.08837	2.11981	3.13825	1.7699	0.90859	1.12997	1.07817	1.42243	0.595926	1.20012	2.34147	1.65545	0.782212	0.852534	2.13545
Tox4	ENSMUSG00000016831	0.258895	-0.45068	0.185154	0.64924	0.928241	0.645414	0.924561	0.794418	0.999571	-0.234512	-0.209636	-0.656501	0.969165	0.999931	0.69976	0.812	2.19035	0.970242	1.09235	1.02176	1.76325	1.31241	0.660563	1.54038	1.26789	0.81542	2.26316	1.96129	1.22751	1.26772	1.02602	1.37168	3.07351	2.18722	2.91921	0.727001	1.77129	2.93574	1.24244	1.32938
Mrps18c	ENSMUSG00000016833	-0.195509	-1.23999	-0.528379	0.471759	0.857802	0.20805	0.797336	0.184759	0.877451	-0.48646	0.706251	0.148153	0.900289	0.999931	0.949677	1.63323	2.12003	2.82248	1.66925	0.575934	2.27801	2.61098	1.11026	0.621997	-0.203763	1.75343	0.0537019	1.3747	1.62737	1.711	2.35074	1.25334	2.6107	2.11358	0.831528	0.771725	1.33804	0.0984466	1.26855	1.95001
[truncated: 8,905 more rows]

## Sheet: MetaData
SampleID	MouseID	Treatment	Genotype	Time_day	Sex	Date_Procedure	DOB	Lib_Batch	DNA_amount	condition
sample1	1614	SCI	GFP	1	M	2018-01-17	2017-10-31	1	2.96	GFP_1
sample2	1602	SCI	tdTomato	7	M	2018-01-25	2017-10-31	1	4.08	tdTomato_7
[truncated: 23 more rows]
