# Supplementary material for: Transcription factor network analysis identifies REST/NRSF as an intrinsic regulator of CNS regeneration
Source: Research Square preprint supplement (doi:10.21203/rs.3.rs-102518/v1), 2020-11-16
Supplement: Supplementary file 5 [file 13927d130dabba37abc38c5d.xlsx]

## Sheet: REST_neg_con90xDEX
Supplemental Table 4. Expression level changes of REST-repressed genes predicted by ARACNe comparing RGCs sorted at 1, 3, 5 days after optic nerve crush with pro-regenerative treatment to non-regenerative RGCs with control treatment. Related to Figure 5.
refseq_mrna	mgi_symbol	description	logFC_D1.T_vs_D1.C	logFC_D3.T_vs_D3.C	logFC_D5.T_vs_D5.C	FDR_D1.T_vs_D1.C	FDR_D3.T_vs_D3.C	FDR_D5.T_vs_D5.C
NM_001033464	Cracr2a	calcium release activated channel regulator 2A [Source:MGI Symbol;Acc:MGI:2685919]	-0.492548	3.70957	1.58116	0.997718	0.000223051	0.113956
NM_172732	Clec9a	C-type lectin domain family 9, member a [Source:MGI Symbol;Acc:MGI:2444608]	-0.152862	3.43271	1.08206	0.998251	0.000196661	0.253508
NM_029056	Tdrd9	tudor domain containing 9 [Source:MGI Symbol;Acc:MGI:1921941]	-0.259788	3.25479	1.24705	0.99794	1.0226e-05	0.104704
NM_001081047	Cnksr1	connector enhancer of kinase suppressor of Ras 1 [Source:MGI Symbol;Acc:MGI:2670958]	0.148079	3.2461	1.97827	0.998251	3.68293e-06	0.00260354
NM_011832	Insrr	insulin receptor-related receptor [Source:MGI Symbol;Acc:MGI:1346037]	-0.311303	3.24277	0.619652	0.997718	1.17044e-05	0.466387
NM_023476	Tinagl1	tubulointerstitial nephritis antigen-like 1 [Source:MGI Symbol;Acc:MGI:2137617]	0.200349	3.19745	1.49561	0.998251	4.52638e-05	0.0585372
NM_016925	Fanca	Fanconi anemia, complementation group A [Source:MGI Symbol;Acc:MGI:1341823]	-0.182048	3.17409	0.848408	0.998251	0.00117366	0.449143
NM_011581	Thbs2	thrombospondin 2 [Source:MGI Symbol;Acc:MGI:98738]	-0.115554	3.16117	1.78114	0.998251	0.000988405	0.0696701
NM_029912	Tmem116	transmembrane protein 116 [Source:MGI Symbol;Acc:MGI:1924712]	0.015833	3.13578	1.16229	0.998825	1.45022e-05	0.118751
NM_172693	Galnt12	polypeptide N-acetylgalactosaminyltransferase 12 [Source:MGI Symbol;Acc:MGI:2444664]	-0.183118	3.13172	1.55534	0.998251	3.3969e-05	0.0329502
NM_007440	Alox12	arachidonate 12-lipoxygenase [Source:MGI Symbol;Acc:MGI:87998]	-0.661022	3.06973	1.60877	0.971896	0.000175295	0.0471045
NM_007883	Dsg2	desmoglein 2 [Source:MGI Symbol;Acc:MGI:1196466]	-0.178381	3.01462	2.17642	0.998251	5.82146e-05	0.00195441
NM_001081084	Cubn	cubilin (intrinsic factor-cobalamin receptor) [Source:MGI Symbol;Acc:MGI:1931256]	-0.156681	2.90195	1.00889	0.998251	0.000118061	0.223455
NM_009421	Traf1	TNF receptor-associated factor 1 [Source:MGI Symbol;Acc:MGI:101836]	0.218957	2.79599	1.69805	0.997726	8.34394e-06	0.00287961
NM_007925	Eln	elastin [Source:MGI Symbol;Acc:MGI:95317]	0.348031	2.7834	1.72708	0.997718	4.73856e-05	0.0108825
NM_153166	Cpne5	copine V [Source:MGI Symbol;Acc:MGI:2385908]	-0.0250222	2.77936	0.705772	0.998825	0.000103459	0.390498
NM_146223	Cplx3	complexin 3 [Source:MGI Symbol;Acc:MGI:2384571]	0.163159	2.73156	1.15855	0.998251	1.01247e-05	0.079662
NM_181816	Deup1	deuterosome assembly protein 1 [Source:MGI Symbol;Acc:MGI:2443026]	-0.736583	2.69152	0.975461	0.946053	0.00130402	0.288912
NM_001081227	Stum	mechanosensory transduction mediator [Source:MGI Symbol;Acc:MGI:2138735]	-0.157066	2.6724	1.51068	0.998251	0.00103559	0.0655799
NM_011169	Prlr	prolactin receptor [Source:MGI Symbol;Acc:MGI:97763]	-0.340343	2.6484	0.65407	0.997718	0.00100755	0.486938
NM_008010	Fgfr3	fibroblast growth factor receptor 3 [Source:MGI Symbol;Acc:MGI:95524]	-0.229785	2.6364	0.817862	0.998251	0.00208818	0.417975
NM_001127725	Sec14l5	SEC14-like lipid binding 5 [Source:MGI Symbol;Acc:MGI:3616084]	0.5366	2.62566	1.34832	0.997367	0.00399466	0.160846
NM_172923	Tmem266	transmembrane protein 266 [Source:MGI Symbol;Acc:MGI:2142980]	0.0492695	2.62288	0.761741	0.998825	6.3647e-05	0.316924
NM_145409	Chtf18	CTF18, chromosome transmission fidelity factor 18 [Source:MGI Symbol;Acc:MGI:2384887]	0.0247746	2.61675	1.26866	0.998825	0.000763387	0.131378
NM_146182	Klc3	kinesin light chain 3 [Source:MGI Symbol;Acc:MGI:1277971]	0.739791	2.59362	1.82388	0.94343	0.00063829	0.0164134
NM_026854	Dtwd2	DTW domain containing 2 [Source:MGI Symbol;Acc:MGI:1916107]	-0.177785	2.58888	0.822768	0.998251	0.000734658	0.364607
NM_001111143	Cym	chymosin [Source:MGI Symbol;Acc:MGI:2684977]	-0.399319	2.57827	1.1522	0.997718	0.00334128	0.243396
NM_172885	Tmem132d	transmembrane protein 132D [Source:MGI Symbol;Acc:MGI:3044963]	0.209066	2.55594	1.71347	0.998251	0.000234378	0.0164585
NM_028892	Spag17	sperm associated antigen 17 [Source:MGI Symbol;Acc:MGI:1921612]	-0.708111	2.55394	1.50325	0.932338	0.000572884	0.032757
NM_010693	Lck	lymphocyte protein tyrosine kinase [Source:MGI Symbol;Acc:MGI:96756]	0.0221349	2.53151	0.583428	0.998825	0.000881655	0.528644
NM_009839	Cct6b	chaperonin containing Tcp1, subunit 6b (zeta) [Source:MGI Symbol;Acc:MGI:1329013]	0.252225	2.52377	1.63187	0.998251	0.00345654	0.0777579
NM_001081066	Dennd3	DENN/MADD domain containing 3 [Source:MGI Symbol;Acc:MGI:2146009]	0.384054	2.51982	1.48437	0.997718	0.00208773	0.0799455
NM_013658	Sema4a	sema domain, immunoglobulin domain (Ig), transmembrane domain (TM) and short cytoplasmic domain, (semaphorin) 4A [Source:MGI Symbol;Acc:MGI:107560]	-0.0283558	2.50861	0.810506	0.998825	1.60295e-07	0.123164
NM_010231	Fmo1	flavin containing monooxygenase 1 [Source:MGI Symbol;Acc:MGI:1310002]	-0.00311799	2.49303	1.05452	0.998962	0.00278827	0.24424
NM_013688	Tcte1	t-complex-associated testis expressed 1 [Source:MGI Symbol;Acc:MGI:98640]	-1.03519	2.48005	1.66787	0.88312	0.00709158	0.0834054
NM_181858	Cd59b	CD59b antigen [Source:MGI Symbol;Acc:MGI:1888996]	-0.531685	2.47034	0.732138	0.955998	8.08554e-05	0.287574
NM_021486	Bco1	beta-carotene oxygenase 1 [Source:MGI Symbol;Acc:MGI:1926923]	-0.496308	2.45254	1.54788	0.991881	0.00111118	0.0470572
NM_013515	Stom	stomatin [Source:MGI Symbol;Acc:MGI:95403]	0.528212	2.44618	2.0991	0.99021	0.000550253	0.00286453
NM_008312	Htr2c	5-hydroxytryptamine (serotonin) receptor 2C [Source:MGI Symbol;Acc:MGI:96281]	-0.17215	2.42588	1.81141	0.998251	0.00427485	0.0365184
NM_134127	Cyp4f15	cytochrome P450, family 4, subfamily f, polypeptide 15 [Source:MGI Symbol;Acc:MGI:2146921]	-0.00594727	2.42441	0.993892	0.998825	0.00538485	0.310709
NM_028075	Tnfrsf13c	tumor necrosis factor receptor superfamily, member 13c [Source:MGI Symbol;Acc:MGI:1919299]	0.330107	2.42279	0.898705	0.997718	0.00172289	0.298271
NM_145356	Zbtb7c	zinc finger and BTB domain containing 7C [Source:MGI Symbol;Acc:MGI:2443302]	0.251641	2.41678	1.75097	0.998251	0.00362782	0.0439191
NM_198621	Cct8l1	chaperonin containing TCP1, subunit 8 (theta)-like 1 [Source:MGI Symbol;Acc:MGI:2685289]	0.0929605	2.40521	1.00541	0.998251	0.0037734	0.294616
NM_175290	Nlrp4f	NLR family, pyrin domain containing 4F [Source:MGI Symbol;Acc:MGI:2145528]	-0.171683	2.39848	0.859597	0.998251	0.00595787	0.404035
NM_031161	Cck	cholecystokinin [Source:MGI Symbol;Acc:MGI:88297]	-0.429705	2.39646	0.78949	0.994329	0.000324631	0.297089
NM_007533	Bckdha	branched chain ketoacid dehydrogenase E1, alpha polypeptide [Source:MGI Symbol;Acc:MGI:107701]	0.285956	2.38356	2.29273	0.997718	6.06605e-05	2.7123e-05
NM_001033356	Ntn5	netrin 5 [Source:MGI Symbol;Acc:MGI:2685330]	-0.140982	2.3813	0.994184	0.998251	0.00118961	0.222916
NM_026301	Rnf125	ring finger protein 125 [Source:MGI Symbol;Acc:MGI:1914914]	0.0347352	2.33338	0.754321	0.998825	0.00249725	0.410674
NM_198664	Tbc1d2	TBC1 domain family, member 2 [Source:MGI Symbol;Acc:MGI:2652885]	0.264708	2.30938	1.19385	0.997726	0.00127058	0.107929
NM_009200	Slc1a6	solute carrier family 1 (high affinity aspartate/glutamate transporter), member 6 [Source:MGI Symbol;Acc:MGI:1096331]	-0.437777	2.30093	1.02744	0.997367	0.00140967	0.211808
NM_027062	C8g	complement component 8, gamma polypeptide [Source:MGI Symbol;Acc:MGI:88237]	0.375032	2.30041	2.85535	0.997718	0.00831296	0.000548273
NM_146964	Olfr61	olfactory receptor 61 [Source:MGI Symbol;Acc:MGI:1333885]	-0.358981	2.2997	1.41121	0.997718	0.00166557	0.0533431
NM_007822	Cyp4a14	cytochrome P450, family 4, subfamily a, polypeptide 14 [Source:MGI Symbol;Acc:MGI:1096550]	-0.444377	2.29679	1.31836	0.99021	0.00073652	0.0494862
NM_001080809	Cps1	carbamoyl-phosphate synthetase 1 [Source:MGI Symbol;Acc:MGI:891996]	-0.528611	2.29509	1.70211	0.941264	0.000173404	0.00240619
NM_008546	Mfap2	microfibrillar-associated protein 2 [Source:MGI Symbol;Acc:MGI:99559]	0.512893	2.27816	1.33221	0.976832	0.000251096	0.0397495
NM_029964	6030468B19Rik	RIKEN cDNA 6030468B19 gene [Source:MGI Symbol;Acc:MGI:1924977]	0.437009	2.26961	1.44285	0.996434	0.001936	0.0508746
NM_009285	Stc1	stanniocalcin 1 [Source:MGI Symbol;Acc:MGI:109131]	0.0305216	2.262	0.825756	0.998825	0.000754734	0.289156
NM_172614	Tmem44	transmembrane protein 44 [Source:MGI Symbol;Acc:MGI:1924489]	0.337217	2.26109	1.26071	0.997718	4.32115e-05	0.0302017
NM_018731	Atp4a	ATPase, H+/K+ exchanging, gastric, alpha polypeptide [Source:MGI Symbol;Acc:MGI:88113]	-0.877693	2.2484	1.36932	0.885975	0.00494713	0.0849157
NM_178381	Ano9	anoctamin 9 [Source:MGI Symbol;Acc:MGI:1918595]	-0.307569	2.2458	0.754586	0.997718	0.00506453	0.428701
NM_177607	4933430I17Rik	RIKEN cDNA 4933430I17 gene [Source:MGI Symbol;Acc:MGI:3045314]	0.181932	2.22762	0.550573	0.998251	0.00207353	0.548647
NM_178900	Prkd2	protein kinase D2 [Source:MGI Symbol;Acc:MGI:2141917]	0.681672	2.22406	1.81015	0.951149	0.0016044	0.0122136
NM_183366	Adam28	a disintegrin and metallopeptidase domain 28 [Source:MGI Symbol;Acc:MGI:105988]	-1.27422	2.22347	1.40861	0.730373	0.0136336	0.123867
NM_133364	Prima1	proline rich membrane anchor 1 [Source:MGI Symbol;Acc:MGI:1926097]	-1.13882	2.21655	0.0769345	0.841981	0.0130526	0.957157
NM_007436	Aldh3a1	aldehyde dehydrogenase family 3, subfamily A1 [Source:MGI Symbol;Acc:MGI:1353451]	-0.40245	2.21145	0.853575	0.997718	0.0131797	0.421506
NM_009641	Angpt4	angiopoietin 4 [Source:MGI Symbol;Acc:MGI:1336887]	0.233353	2.20708	1.70087	0.997718	0.000404871	0.00240619
NM_177898	Nek5	NIMA (never in mitosis gene a)-related expressed kinase 5 [Source:MGI Symbol;Acc:MGI:2142824]	-0.0924266	2.20406	0.726422	0.998251	0.00893884	0.482069
NM_026150	4921536K21Rik	RIKEN cDNA 4921536K21 gene [Source:MGI Symbol;Acc:MGI:1914680]	-0.0978855	2.19536	0.616175	0.998251	0.00960101	0.577492
NM_028186	Nkd2	naked cuticle 2 [Source:MGI Symbol;Acc:MGI:1919543]	0.284871	2.17725	1.6781	0.998251	0.0170506	0.0789718
NM_019699	Fads2	fatty acid desaturase 2 [Source:MGI Symbol;Acc:MGI:1930079]	0.328056	2.14655	0.861752	0.99021	4.11699e-07	0.0656464
NM_011834	Aadat	aminoadipate aminotransferase [Source:MGI Symbol;Acc:MGI:1345167]	-0.14045	2.11614	1.20406	0.998251	0.000997456	0.0487068
NM_008604	Mme	membrane metallo endopeptidase [Source:MGI Symbol;Acc:MGI:97004]	-0.70995	2.10762	2.61209	0.945582	0.00421311	0.000389344
NM_010391	H2-Q10	histocompatibility 2, Q region locus 10 [Source:MGI Symbol;Acc:MGI:95929]	0.168949	2.10473	1.45723	0.998251	0.00869739	0.0804896
NM_026668	Lrriq4	leucine-rich repeats and IQ motif containing 4 [Source:MGI Symbol;Acc:MGI:1915557]	-0.447294	2.10184	1.44911	0.991881	0.00328461	0.0380626
NM_013845	Ror1	receptor tyrosine kinase-like orphan receptor 1 [Source:MGI Symbol;Acc:MGI:1347520]	0.139247	2.09708	1.43256	0.998251	0.00618956	0.0815628
NM_194058	Nlrp9b	NLR family, pyrin domain containing 9B [Source:MGI Symbol;Acc:MGI:2675377]	-1.02624	2.09348	2.02116	0.737737	0.00607697	0.00362878
NM_001033782	Gm5592	predicted gene 5592 [Source:MGI Symbol;Acc:MGI:3648691]	0.0732421	2.08661	1.24476	0.998251	0.00391853	0.089622
NM_009651	Akap4	A kinase (PRKA) anchor protein 4 [Source:MGI Symbol;Acc:MGI:102794]	-0.319259	2.07173	0.777193	0.997718	0.00251399	0.310898
NM_001165919	Majin	membrane anchored junction protein [Source:MGI Symbol;Acc:MGI:1923913]	0.471347	2.07128	1.44562	0.992153	0.00311693	0.05147
NM_008968	Ptgis	prostaglandin I2 (prostacyclin) synthase [Source:MGI Symbol;Acc:MGI:1097156]	-0.127466	2.06817	1.35168	0.998251	0.0228354	0.185921
NM_177076	Fbxl13	F-box and leucine-rich repeat protein 13 [Source:MGI Symbol;Acc:MGI:2443416]	-1.02724	2.06153	0.948183	0.798375	0.00576468	0.263031
NM_009109	Ryr1	ryanodine receptor 1, skeletal muscle [Source:MGI Symbol;Acc:MGI:99659]	-0.37095	2.05165	1.09705	0.997718	0.00422088	0.174598
NM_011267	Rgs16	regulator of G-protein signaling 16 [Source:MGI Symbol;Acc:MGI:108407]	-0.143638	2.04057	0.679519	0.998251	9.18725e-05	0.268704
NM_023529	Ms4a10	membrane-spanning 4-domains, subfamily A, member 10 [Source:MGI Symbol;Acc:MGI:1917076]	-0.395587	2.02252	2.15391	0.997367	0.00491355	0.000856947
NM_133237	Apcdd1	adenomatosis polyposis coli down-regulated 1 [Source:MGI Symbol;Acc:MGI:3513977]	0.644254	2.01435	1.75427	0.969857	0.00471678	0.0171099
NM_011177	Klk6	kallikrein related-peptidase 6 [Source:MGI Symbol;Acc:MGI:1343166]	-0.247009	2.01113	1.75204	0.998251	0.0136699	0.0306108
NM_027581	Lrrc63	leucine rich repeat containing 63 [Source:MGI Symbol;Acc:MGI:1918109]	-0.813707	2.00188	1.10058	0.811687	0.00444574	0.130043
NM_010744	Tmed1	transmembrane p24 trafficking protein 1 [Source:MGI Symbol;Acc:MGI:106201]	0.0316586	1.97232	0.962119	0.998825	0.00918248	0.270411
NM_001113356	C1rb	complement component 1, r subcomponent B [Source:MGI Symbol;Acc:MGI:3779804]	-0.534512	1.95423	0.750272	0.940569	0.00242713	0.30114
NM_175349	Ldhal6b	lactate dehydrogenase A-like 6B [Source:MGI Symbol;Acc:MGI:2146830]	-0.244987	1.94174	1.21775	0.998251	0.00761736	0.122249
NM_053070	Car7	carbonic anhydrase 7 [Source:MGI Symbol;Acc:MGI:103100]	-0.560941	1.93796	1.25369	0.997136	0.0272097	0.205643
NM_019725	Tle2	transducin-like enhancer of split 2 [Source:MGI Symbol;Acc:MGI:104635]	-0.104551	1.9302	1.55052	0.998251	0.00105337	0.0117373
NM_181323	Cwh43	cell wall biogenesis 43 C-terminal homolog [Source:MGI Symbol;Acc:MGI:2444131]	-0.477229	1.92665	0.769328	0.984635	0.00460877	0.311492
NM_008005	Fgf18	fibroblast growth factor 18 [Source:MGI Symbol;Acc:MGI:1277980]	0.065763	1.92534	1.45484	0.998825	0.02447	0.105934
NM_019810	Slc5a1	solute carrier family 5 (sodium/glucose cotransporter), member 1 [Source:MGI Symbol;Acc:MGI:107678]	-0.383214	1.91897	0.80055	0.997718	0.00996682	0.324689
NM_011193	Pstpip1	proline-serine-threonine phosphatase-interacting protein 1 [Source:MGI Symbol;Acc:MGI:1321396]	0.214248	1.90489	1.88072	0.998251	0.0101974	0.0129501
NM_148949	Tdpoz1	TD and POZ domain containing 1 [Source:MGI Symbol;Acc:MGI:2449436]	-0.441547	1.9032	1.12445	0.997718	0.0157178	0.179172
NM_001110807	Capn12	calpain 12 [Source:MGI Symbol;Acc:MGI:1891369]	-0.10184	1.8908	0.839829	0.998251	0.0458873	0.48207
NM_009708	Rnd2	Rho family GTPase 2 [Source:MGI Symbol;Acc:MGI:1338755]	-0.0816518	1.88556	0.371347	0.998251	0.00154101	0.645488
NM_001101443	Prrt4	proline-rich transmembrane protein 4 [Source:MGI Symbol;Acc:MGI:2141677]	0.237193	1.86235	0.996261	0.998251	0.0241162	0.266591
NM_011351	Sema6c	sema domain, transmembrane domain (TM), and cytoplasmic domain, (semaphorin) 6C [Source:MGI Symbol;Acc:MGI:1338032]	0.248813	1.84625	0.982218	0.997718	0.00102636	0.12229
NM_008288	Hsd11b1	hydroxysteroid 11-beta dehydrogenase 1 [Source:MGI Symbol;Acc:MGI:103562]	-0.660629	1.84345	0.723172	0.914257	0.00866276	0.374691
NM_001037865	Col28a1	collagen, type XXVIII, alpha 1 [Source:MGI Symbol;Acc:MGI:2685312]	-0.335935	1.84021	1.40763	0.997718	0.0285546	0.144198
NM_022026	Aqp9	aquaporin 9 [Source:MGI Symbol;Acc:MGI:1891066]	-0.083527	1.83514	1.44145	0.998251	0.00860274	0.0349678
NM_025585	1700029F12Rik	RIKEN cDNA 1700029F12 gene [Source:MGI Symbol;Acc:MGI:1913729]	-0.741266	1.83054	1.88025	0.949428	0.0355758	0.0213591
NM_001177899	Skap1	src family associated phosphoprotein 1 [Source:MGI Symbol;Acc:MGI:1925723]	0.302111	1.8264	1.57297	0.997718	0.0133483	0.0275195
NM_133849	Hrh3	histamine receptor H3 [Source:MGI Symbol;Acc:MGI:2139279]	-0.189721	1.82166	0.793582	0.998251	0.00614062	0.322309
NM_054048	Rcor2	REST corepressor 2 [Source:MGI Symbol;Acc:MGI:1859854]	0.0875989	1.8201	0.593011	0.998251	0.0241453	0.57194
NM_001172168	Trim40	tripartite motif-containing 40 [Source:MGI Symbol;Acc:MGI:2684881]	-0.8536	1.81682	0.735659	0.883441	0.0136186	0.404069
NM_026531	Aen	apoptosis enhancing nuclease [Source:MGI Symbol;Acc:MGI:1915298]	0.277668	1.81542	0.843174	0.997718	0.00151194	0.185961
NM_172466	Adamts18	a disintegrin-like and metallopeptidase (reprolysin type) with thrombospondin type 1 motif, 18 [Source:MGI Symbol;Acc:MGI:2442600]	0.0973207	1.81186	1.0888	0.998251	0.00221436	0.0995653
NM_001024138	Gpr139	G protein-coupled receptor 139 [Source:MGI Symbol;Acc:MGI:2685341]	-0.429508	1.79555	1.86078	0.991881	0.00230142	0.00191598
NM_015743	Nr4a3	nuclear receptor subfamily 4, group A, member 3 [Source:MGI Symbol;Acc:MGI:1352457]	-0.192978	1.79517	1.12062	0.998251	0.00222983	0.0686187
NM_029007	Lratd1	LRAT domain containing 1 [Source:MGI Symbol;Acc:MGI:2145011]	-0.576252	1.79099	0.400612	0.987262	0.0224274	0.710567
NM_001013390	Scn4b	sodium channel, type IV, beta [Source:MGI Symbol;Acc:MGI:2687406]	-0.987755	1.77955	1.17963	0.824735	0.0166138	0.160032
NM_008182	Gsta2	glutathione S-transferase, alpha 2 (Yc2) [Source:MGI Symbol;Acc:MGI:95863]	-0.117382	1.77434	2.45594	0.998251	0.0132662	0.000122534
NM_134246	Acot3	acyl-CoA thioesterase 3 [Source:MGI Symbol;Acc:MGI:2159619]	-0.805668	1.77392	1.15549	0.946053	0.0475018	0.269147
NM_001033879	Tubal3	tubulin, alpha-like 3 [Source:MGI Symbol;Acc:MGI:3588215]	-0.0327814	1.77205	1.40727	0.998825	0.0278533	0.0945973
NM_172857	Exd1	exonuclease 3'-5' domain containing 1 [Source:MGI Symbol;Acc:MGI:3045306]	-0.200858	1.76587	0.468836	0.998251	0.0210394	0.644109
NM_023517	Tnfsf13	tumor necrosis factor (ligand) superfamily, member 13 [Source:MGI Symbol;Acc:MGI:1916833]	0.641458	1.74286	2.01193	0.972909	0.0195845	0.00825795
NM_198614	C2cd4c	C2 calcium-dependent domain containing 4C [Source:MGI Symbol;Acc:MGI:2685084]	-0.508297	1.7249	0.708962	0.997718	0.0641337	0.562672
NM_001112735	9930012K11Rik	RIKEN cDNA 9930012K11 gene [Source:MGI Symbol;Acc:MGI:2145726]	-0.823616	1.72161	0.40455	0.875465	0.0103951	0.671233
NM_133883	Adprhl2	ADP-ribosylhydrolase like 2 [Source:MGI Symbol;Acc:MGI:2140364]	-0.0738616	1.7192	1.02862	0.998251	0.0276508	0.263767
NM_027612	4921539E11Rik	RIKEN cDNA 4921539E11 gene [Source:MGI Symbol;Acc:MGI:1918191]	-0.148764	1.71752	1.66875	0.998251	0.00765018	0.00844096
NM_148413	Myo3a	myosin IIIA [Source:MGI Symbol;Acc:MGI:2183924]	-0.314637	1.71618	0.793158	0.997718	0.0079159	0.252056
NM_001033783	Pate9	prostate and testis expressed 9 [Source:MGI Symbol;Acc:MGI:3647347]	-0.300168	1.70363	2.24657	0.997718	0.0258434	0.00132958
NM_007558	Bmp8a	bone morphogenetic protein 8a [Source:MGI Symbol;Acc:MGI:104515]	0.074756	1.70353	1.22519	0.998251	0.0133615	0.0690987
NM_133435	Nmnat1	nicotinamide nucleotide adenylyltransferase 1 [Source:MGI Symbol;Acc:MGI:1913704]	-0.339925	1.70028	0.884941	0.997718	0.02294	0.338901
NM_013582	Lhcgr	luteinizing hormone/choriogonadotropin receptor [Source:MGI Symbol;Acc:MGI:96783]	0.0395106	1.69989	0.783918	0.998825	0.011816	0.280219
NM_053094	Cd163	CD163 antigen [Source:MGI Symbol;Acc:MGI:2135946]	-0.487763	1.68993	1.33695	0.949428	0.00457365	0.0173354
NM_133223	Rac3	Rac family small GTPase 3 [Source:MGI Symbol;Acc:MGI:2180784]	0.312413	1.68122	1.6564	0.997718	0.00664468	0.00855351
NM_016905	Galk1	galactokinase 1 [Source:MGI Symbol;Acc:MGI:95730]	0.367799	1.68011	1.24442	0.997718	0.0094287	0.0756435
NM_146962	Olfr541	olfactory receptor 541 [Source:MGI Symbol;Acc:MGI:3030375]	0.344299	1.66027	1.40388	0.997718	0.0216944	0.0509305
NM_001039658	Tesmin	testis expressed metallothionein like [Source:MGI Symbol;Acc:MGI:1340029]	-0.399894	1.65846	1.08216	0.997718	0.0288255	0.21424
NM_008649	Mup5	major urinary protein 5 [Source:MGI Symbol;Acc:MGI:104974]	-0.3958	1.65786	0.731681	0.991881	0.0102536	0.302932
NM_011412	Slit3	slit guidance ligand 3 [Source:MGI Symbol;Acc:MGI:1315202]	-0.473935	1.65445	0.766998	0.997718	0.0510315	0.480653
NM_025648	Farsa	phenylalanyl-tRNA synthetase, alpha subunit [Source:MGI Symbol;Acc:MGI:1913840]	0.280768	1.6428	1.39753	0.99322	2.46013e-05	0.000318559
NM_025977	Ccdc159	coiled-coil domain containing 159 [Source:MGI Symbol;Acc:MGI:1914369]	-0.11094	1.63855	0.645819	0.998251	0.00373351	0.356065
NM_146828	Olfr975	olfactory receptor 975 [Source:MGI Symbol;Acc:MGI:3030809]	0.0989775	1.63825	1.96822	0.998251	0.0275008	0.00384017
NM_001162923	Rasl12	RAS-like, family 12 [Source:MGI Symbol;Acc:MGI:1918034]	0.312255	1.63784	1.69909	0.997718	0.0121136	0.0109735
NM_175529	Leng9	leukocyte receptor cluster (LRC) member 9 [Source:MGI Symbol;Acc:MGI:2444509]	0.0463536	1.6321	0.594959	0.998825	0.0224733	0.506839
NM_031255	Rsph6a	radial spoke head 6 homolog A (Chlamydomonas) [Source:MGI Symbol;Acc:MGI:1927643]	-0.408202	1.61405	0.828503	0.992296	0.0120654	0.227023
NM_019488	Slc2a8	solute carrier family 2, (facilitated glucose transporter), member 8 [Source:MGI Symbol;Acc:MGI:1860103]	0.121428	1.60782	1.04389	0.998251	0.00101383	0.0470572
NM_011846	Mmp17	matrix metallopeptidase 17 [Source:MGI Symbol;Acc:MGI:1346076]	-0.150158	1.60689	0.802778	0.998251	0.0114112	0.280089
NM_080849	Nek8	NIMA (never in mitosis gene a)-related expressed kinase 8 [Source:MGI Symbol;Acc:MGI:1890646]	0.0318511	1.60307	0.859945	0.998825	0.0245229	0.324338
NM_008895	Pomc	pro-opiomelanocortin-alpha [Source:MGI Symbol;Acc:MGI:97742]	-0.0226526	1.59829	1.49192	0.998825	0.0189553	0.0224064
NM_018881	Fmo2	flavin containing monooxygenase 2 [Source:MGI Symbol;Acc:MGI:1916776]	-0.0258868	1.59444	1.03573	0.998825	0.0387916	0.230012
NM_008275	Hoxd13	homeobox D13 [Source:MGI Symbol;Acc:MGI:96205]	-0.442987	1.57635	1.57354	0.997718	0.052931	0.0493756
NM_029367	Spaca3	sperm acrosome associated 3 [Source:MGI Symbol;Acc:MGI:1922872]	-0.624822	1.57423	1.44162	0.942789	0.0381225	0.0494616
NM_001033978	H2-Eb2	histocompatibility 2, class II antigen E beta2 [Source:MGI Symbol;Acc:MGI:95902]	-0.144423	1.55237	2.31169	0.998251	0.0262714	0.000236277
NM_001135093	Klf14	Kruppel-like factor 14 [Source:MGI Symbol;Acc:MGI:3577024]	-0.378733	1.54945	1.52598	0.997367	0.0221481	0.0337707
NM_145462	Haus4	HAUS augmin-like complex, subunit 4 [Source:MGI Symbol;Acc:MGI:1261794]	0.000289693	1.54465	0.604902	0.999905	0.00593229	0.390542
NM_174854	Disc1	disrupted in schizophrenia 1 [Source:MGI Symbol;Acc:MGI:2447658]	0.364794	1.53191	0.985261	0.997718	0.0504957	0.283197
NM_172855	Galnt5	polypeptide N-acetylgalactosaminyltransferase 5 [Source:MGI Symbol;Acc:MGI:2179403]	0.00222814	1.52263	0.908525	0.998962	0.0395454	0.268077
NM_026291	4930522H14Rik	RIKEN cDNA 4930522H14 gene [Source:MGI Symbol;Acc:MGI:1914896]	-0.219421	1.52031	0.505138	0.997718	0.0129827	0.490294
NM_001024720	Hmcn1	hemicentin 1 [Source:MGI Symbol;Acc:MGI:2685047]	-0.840355	1.51621	0.471067	0.49286	0.000133016	0.354428
NM_010895	Neurod2	neurogenic differentiation 2 [Source:MGI Symbol;Acc:MGI:107755]	-0.603433	1.49396	0.829367	0.971896	0.0319944	0.327473
NM_009446	Tuba3a	tubulin, alpha 3A [Source:MGI Symbol;Acc:MGI:1095406]	-0.881186	1.48491	0.10975	0.808624	0.0274538	0.915974
NM_027469	Gfod2	glucose-fructose oxidoreductase domain containing 2 [Source:MGI Symbol;Acc:MGI:1917825]	-0.116526	1.48139	0.508939	0.998251	0.0281469	0.564413
NM_016973	St6galnac6	ST6 (alpha-N-acetyl-neuraminyl-2,3-beta-galactosyl-1,3)-N-acetylgalactosaminide alpha-2,6-sialyltransferase 6 [Source:MGI Symbol;Acc:MGI:1355316]	-0.291136	1.47922	1.16011	0.984635	3.58446e-05	0.0017855
NM_146350	Olfr1123	olfactory receptor 1123 [Source:MGI Symbol;Acc:MGI:3030957]	-0.177629	1.4743	1.0195	0.998251	0.0228908	0.108125
NM_025276	Evpl	envoplakin [Source:MGI Symbol;Acc:MGI:107507]	0.164123	1.44924	1.179	0.998251	0.0150242	0.0767468
NM_009046	Relb	avian reticuloendotheliosis viral (v-rel) oncogene related B [Source:MGI Symbol;Acc:MGI:103289]	0.304751	1.4403	1.38203	0.997718	0.0188981	0.0357522
NM_147222	Rdh19	retinol dehydrogenase 19 [Source:MGI Symbol;Acc:MGI:2678390]	-0.374169	1.43475	0.713096	0.997367	0.0303522	0.370156
NM_146161	Arhgap24	Rho GTPase activating protein 24 [Source:MGI Symbol;Acc:MGI:1922647]	0.245986	1.42874	0.675843	0.997718	0.00144087	0.213164
NM_027122	Mfsd3	major facilitator superfamily domain containing 3 [Source:MGI Symbol;Acc:MGI:1916822]	-0.730192	1.42188	0.410098	0.940569	0.043535	0.681787
NM_001033361	Pgr15l	G protein-coupled receptor 15-like [Source:MGI Symbol;Acc:MGI:2676330]	-0.557293	1.42077	0.157976	0.988065	0.0760465	0.894062
NM_022422	Gng13	guanine nucleotide binding protein (G protein), gamma 13 [Source:MGI Symbol;Acc:MGI:1925616]	0.0745973	1.40869	0.763019	0.998251	0.0821017	0.46536
NM_028767	Foxp4	forkhead box P4 [Source:MGI Symbol;Acc:MGI:1921373]	0.110429	1.40541	0.9472	0.998251	0.00545986	0.100806
NM_010364	Gtf2h4	general transcription factor II H, polypeptide 4 [Source:MGI Symbol;Acc:MGI:1338799]	0.208593	1.37159	1.09685	0.998251	0.0258152	0.11241
NM_016974	Dbp	D site albumin promoter binding protein [Source:MGI Symbol;Acc:MGI:94866]	0.380688	1.36797	1.31044	0.994104	0.00846938	0.0195117
NM_183195	Marveld1	MARVEL (membrane-associating) domain containing 1 [Source:MGI Symbol;Acc:MGI:2147570]	0.260563	1.36154	0.790762	0.997718	0.0193119	0.25601
NM_027094	Dydc1	DPY30 domain containing 1 [Source:MGI Symbol;Acc:MGI:1916746]	-0.235771	1.35111	1.03622	0.997718	0.0296565	0.110322
NM_001099276	Pik3c2b	phosphatidylinositol-4-phosphate 3-kinase catalytic subunit type 2 beta [Source:MGI Symbol;Acc:MGI:2685045]	-0.064259	1.34751	0.315914	0.998251	0.000765558	0.571581
NM_019431	Cacng4	calcium channel, voltage-dependent, gamma subunit 4 [Source:MGI Symbol;Acc:MGI:1859167]	0.139654	1.34364	0.884708	0.998251	0.0474787	0.276514
NM_007710	Ckm	creatine kinase, muscle [Source:MGI Symbol;Acc:MGI:88413]	-0.162437	1.33111	0.0842054	0.998251	0.0540213	0.937902
NM_020032	Poll	polymerase (DNA directed), lambda [Source:MGI Symbol;Acc:MGI:1889000]	-0.121341	1.32835	1.23247	0.998251	0.0324787	0.0670091
NM_153102	Zfp352	zinc finger protein 352 [Source:MGI Symbol;Acc:MGI:2387418]	-0.389482	1.31958	0.935929	0.99021	0.026826	0.152758
NM_176829	Fem1al	fem-1 homolog A like [Source:MGI Symbol;Acc:MGI:2441689]	0.0844596	1.3032	1.07145	0.998251	0.0932823	0.24895
NM_027984	Epn3	epsin 3 [Source:MGI Symbol;Acc:MGI:1919139]	-0.300159	1.30193	0.424569	0.997718	0.0266705	0.602984
NM_138301	Trpm2	transient receptor potential cation channel, subfamily M, member 2 [Source:MGI Symbol;Acc:MGI:1351901]	-0.458362	1.29271	0.85918	0.950574	0.00463774	0.101561
NM_010143	Ephb3	Eph receptor B3 [Source:MGI Symbol;Acc:MGI:104770]	0.294303	1.27235	0.826112	0.997718	0.0250946	0.222084
NM_007557	Bmp7	bone morphogenetic protein 7 [Source:MGI Symbol;Acc:MGI:103302]	-0.837763	1.27112	0.644379	0.854249	0.0429371	0.423249
NM_001013386	Rasl10b	RAS-like, family 10, member B [Source:MGI Symbol;Acc:MGI:2685575]	-0.148604	1.26732	1.14867	0.998251	0.0189265	0.0546916
NM_008235	Hes1	hes family bHLH transcription factor 1 [Source:MGI Symbol;Acc:MGI:104853]	0.165111	1.25813	0.783072	0.998251	0.0287171	0.265458
NM_030075	Klhdc8b	kelch domain containing 8B [Source:MGI Symbol;Acc:MGI:1925517]	0.190432	1.24916	1.14989	0.997718	0.00442533	0.014715
NM_183406	Cox6b2	cytochrome c oxidase subunit 6B2 [Source:MGI Symbol;Acc:MGI:3044182]	0.166221	1.24799	0.786576	0.998251	0.0384229	0.285514
NM_207203	Prr36	proline rich 36 [Source:MGI Symbol;Acc:MGI:3605626]	0.121039	1.24215	0.653703	0.998251	0.00892299	0.264557
NM_153790	Scarf2	scavenger receptor class F, member 2 [Source:MGI Symbol;Acc:MGI:1858430]	0.270605	1.22563	1.22688	0.997726	0.0861257	0.116205
NM_025809	Clec14a	C-type lectin domain family 14, member a [Source:MGI Symbol;Acc:MGI:1914114]	0.0862771	1.22314	1.55234	0.998251	0.115321	0.0676311
NM_030210	Aacs	acetoacetyl-CoA synthetase [Source:MGI Symbol;Acc:MGI:1926144]	-0.0276208	1.21484	0.614726	0.998825	0.00768709	0.274387
NM_008856	Prkch	protein kinase C, eta [Source:MGI Symbol;Acc:MGI:97600]	-0.111883	1.184	0.241548	0.998251	0.0371682	0.778416
NM_021515	Ak1	adenylate kinase 1 [Source:MGI Symbol;Acc:MGI:87977]	0.330401	1.17386	0.909871	0.994329	0.0103115	0.0746247
NM_144514	Commd1	COMM domain containing 1 [Source:MGI Symbol;Acc:MGI:109474]	0.203323	1.1463	0.76074	0.997718	0.0112501	0.156011
NM_146356	Olfr521	olfactory receptor 521 [Source:MGI Symbol;Acc:MGI:3030355]	-0.314799	1.13617	1.1148	0.997718	0.0834798	0.131549
NM_025685	Col27a1	collagen, type XXVII, alpha 1 [Source:MGI Symbol;Acc:MGI:2672118]	-0.0885676	1.11926	1.2715	0.998251	0.0373966	0.0331466
NM_011242	Rasgrp2	RAS, guanyl releasing protein 2 [Source:MGI Symbol;Acc:MGI:1333849]	-0.409185	1.10449	0.882252	0.997367	0.0835881	0.255765
NM_033037	Cdo1	cysteine dioxygenase 1, cytosolic [Source:MGI Symbol;Acc:MGI:105925]	-0.255146	1.07578	0.612399	0.997718	0.050527	0.385503
NM_009574	Zic2	zinc finger protein of the cerebellum 2 [Source:MGI Symbol;Acc:MGI:106679]	-0.508886	1.07169	1.29442	0.991881	0.128643	0.0924684
NM_053248	Slc5a5	solute carrier family 5 (sodium iodide symporter), member 5 [Source:MGI Symbol;Acc:MGI:2149330]	-0.331499	1.06966	0.521683	0.994104	0.0179248	0.371752
NM_206856	Tacc2	transforming, acidic coiled-coil containing protein 2 [Source:MGI Symbol;Acc:MGI:1928899]	0.132627	1.04478	0.431293	0.997718	2.96368e-05	0.160846
NM_025610	Asrgl1	asparaginase like 1 [Source:MGI Symbol;Acc:MGI:1913764]	0.100804	1.02429	0.412661	0.998251	0.0114236	0.447553
NM_025611	Cul7	cullin 7 [Source:MGI Symbol;Acc:MGI:1913765]	0.0498722	1.01099	0.233619	0.998251	0.0143257	0.702683
NM_027884	Tns1	tensin 1 [Source:MGI Symbol;Acc:MGI:104552]	0.145165	0.96255	0.834005	0.997718	0.00374628	0.0260873
NM_028627	Psd	pleckstrin and Sec7 domain containing [Source:MGI Symbol;Acc:MGI:1920978]	0.265403	0.958005	0.882291	0.997718	0.0215507	0.0658344
NM_199027	Zfp335	zinc finger protein 335 [Source:MGI Symbol;Acc:MGI:2682313]	0.122104	0.949583	0.583042	0.997718	0.000352529	0.058703
NM_172132	Kdm4b	lysine (K)-specific demethylase 4B [Source:MGI Symbol;Acc:MGI:2442355]	-0.0167926	0.941756	0.260116	0.998825	0.0301039	0.686497
NM_022014	Fn3k	fructosamine 3 kinase [Source:MGI Symbol;Acc:MGI:1926834]	-0.406857	0.927156	0.645323	0.972419	0.0369386	0.243561
NM_001033312	Fbxl18	F-box and leucine-rich repeat protein 18 [Source:MGI Symbol;Acc:MGI:2444450]	-0.0176398	0.923609	1.07436	0.998825	0.0964773	0.0854442
NM_175360	Stn1	STN1, CST complex subunit [Source:MGI Symbol;Acc:MGI:1915581]	0.0670738	0.915875	0.385922	0.998251	0.0302729	0.503423
NM_001243758	Pde2a	phosphodiesterase 2A, cGMP-stimulated [Source:MGI Symbol;Acc:MGI:2446107]	0.0268499	0.907229	0.567357	0.998825	0.0065001	0.160144
NM_028730	Pex26	peroxisomal biogenesis factor 26 [Source:MGI Symbol;Acc:MGI:1921293]	-0.131552	0.872343	0.937598	0.998251	0.0255771	0.032262
NM_180662	Trappc9	trafficking protein particle complex 9 [Source:MGI Symbol;Acc:MGI:1923760]	0.0729305	0.868745	0.251752	0.998251	0.000536618	0.46503
NM_172584	Itpk1	inositol 1,3,4-triphosphate 5/6 kinase [Source:MGI Symbol;Acc:MGI:2446159]	-0.00574128	0.855426	1.40784	0.998825	0.0414206	0.00153749
NM_145434	Nr1d1	nuclear receptor subfamily 1, group D, member 1 [Source:MGI Symbol;Acc:MGI:2444210]	-0.00276572	0.853258	0.807256	0.998825	0.000175034	0.00107464
NM_080289	Grhpr	glyoxylate reductase/hydroxypyruvate reductase [Source:MGI Symbol;Acc:MGI:1923488]	0.118691	0.85219	1.3652	0.998251	0.128565	0.0243921
NM_009561	Zfp61	zinc finger protein 61 [Source:MGI Symbol;Acc:MGI:99663]	-0.205388	0.847356	0.374792	0.997718	0.0614908	0.551731
NM_178045	Rassf4	Ras association (RalGDS/AF-6) domain family member 4 [Source:MGI Symbol;Acc:MGI:2386853]	-0.119248	0.83928	0.43931	0.99794	0.0065729	0.262016
NM_009176	St3gal3	ST3 beta-galactoside alpha-2,3-sialyltransferase 3 [Source:MGI Symbol;Acc:MGI:1316659]	-0.108358	0.817462	0.355647	0.998251	0.0211139	0.454006
NM_020022	Rfc2	replication factor C (activator 1) 2 [Source:MGI Symbol;Acc:MGI:1341868]	0.042431	0.79469	0.921624	0.998251	0.0136837	0.00874453
NM_009024	Rara	retinoic acid receptor, alpha [Source:MGI Symbol;Acc:MGI:97856]	0.209798	0.709769	0.937398	0.997367	0.0194444	0.00466667
NM_183311	Tmem145	transmembrane protein 145 [Source:MGI Symbol;Acc:MGI:3607779]	-0.0330981	0.704014	0.321147	0.998251	0.0391953	0.496091
NM_033610	Sncb	synuclein, beta [Source:MGI Symbol;Acc:MGI:1889011]	0.0132311	0.700738	0.839719	0.998825	0.0205836	0.0118266
NM_178242	Tnrc18	trinucleotide repeat containing 18 [Source:MGI Symbol;Acc:MGI:3648294]	0.0414804	0.68521	0.691148	0.998251	0.0044457	0.0101321
NM_153060	Spns2	spinster homolog 2 [Source:MGI Symbol;Acc:MGI:2384936]	-0.203967	0.646128	0.543524	0.997718	0.0641014	0.205541
NM_009947	Cpne6	copine VI [Source:MGI Symbol;Acc:MGI:1334445]	-0.547856	0.627487	0.533938	0.754228	0.0640081	0.203683
NM_013571	Ksr1	kinase suppressor of ras 1 [Source:MGI Symbol;Acc:MGI:105051]	0.131941	0.61465	0.881723	0.998251	0.0835735	0.0264057
NM_172272	Pars2	prolyl-tRNA synthetase (mitochondrial)(putative) [Source:MGI Symbol;Acc:MGI:2386296]	-0.300352	0.598597	1.05126	0.997718	0.250216	0.0681008
NM_172449	Tspoap1	TSPO associated protein 1 [Source:MGI Symbol;Acc:MGI:2450877]	0.0593467	0.580848	0.5498	0.998251	0.0193365	0.0602264
NM_153545	Lrrc45	leucine rich repeat containing 45 [Source:MGI Symbol;Acc:MGI:2387183]	-0.319885	0.559674	0.75384	0.942789	0.0619737	0.0259024
NM_011129	Septin4	septin 4 [Source:MGI Symbol;Acc:MGI:1270156]	-0.106097	0.546445	0.627478	0.998251	0.0856216	0.0933167
NM_008018	Sh3pxd2a	SH3 and PX domains 2A [Source:MGI Symbol;Acc:MGI:1298393]	-0.0509835	0.46113	1.01972	0.998251	0.0863419	0.000342558
NM_198423	Bahcc1	BAH domain and coiled-coil containing 1 [Source:MGI Symbol;Acc:MGI:2679272]	-0.232503	0.365742	1.0173	0.996405	0.264519	0.00336374
NM_013630	Pkd1	polycystin 1, transient receptor poteintial channel interacting [Source:MGI Symbol;Acc:MGI:97603]	-0.0330072	0.35415	0.26492	0.998251	0.0751007	0.30706
NM_009800	Car11	carbonic anhydrase 11 [Source:MGI Symbol;Acc:MGI:1336193]	-0.0932749	0.320523	0.939253	0.998251	0.216197	0.000499882
NM_019763	Spen	spen family transcription repressor [Source:MGI Symbol;Acc:MGI:1891706]	-0.139239	0.170137	0.508143	0.996434	0.399324	0.0204262
