# Supplementary material for: Transcription factor network analysis identifies REST/NRSF as an intrinsic regulator of CNS regeneration
Source: Research Square preprint supplement (doi:10.21203/rs.3.rs-102518/v1), 2020-11-16
Supplement: Supplementary file 6 [file 319f0704d5925f2e147cc3c4.xlsx]

## Sheet: REST_ME
Supplemental Table S2. (A) Module eigengenes (MEs) of co-expression gene networks in RNA-seq of wild-type or REST knockout cortical motor neurons in sham or SCI conditions. SampleID refers to Supplemental Table S1 MetaData.
SampleID	MEgreen	MEyellow	MElightcyan	MEdarkturquoise	MEmidnightblue	MEorange	MEdarkred	MEgrey60	MEcyan	MElightyellow	MEgreenyellow	MEred	MEbrown	MEblue	MElightgreen	MEpink	MEpurple	MEdarkgreen	MEdarkgrey	MEblack	MEmagenta	MEroyalblue	MEturquoise	MEsalmon	MEtan	MEgrey
sample1	-0.114018	0.241489	-0.242989	0.2911	0.245402	-0.254296	-0.330074	-0.381302	0.227495	0.261527	0.148674	-0.164612	0.110683	0.218546	-0.294481	0.362067	0.294538	-0.430223	-0.396653	-0.41364	-0.391074	-0.0593608	-0.0561963	-0.00449694	-0.087076	0.056161
sample2	-0.10939	0.12448	0.137773	0.0735781	0.130943	0.168341	0.190414	-0.171555	0.255873	-0.406052	0.0724628	0.00130992	0.153736	0.115298	0.116497	-0.300186	-0.315398	0.0881376	0.029252	-0.0532604	0.400929	0.325113	0.123118	-0.00938517	0.0756825	-0.200485
sample3	-0.0483438	-0.155264	0.139092	-0.0951012	0.0331345	-0.173243	-0.114919	0.0799652	0.0504111	-0.0897419	-0.0073842	0.0736253	-0.0417927	-0.195482	-0.0511702	-0.0937408	0.203007	-0.118347	0.259959	-0.134032	-0.0223318	-0.0348683	-0.22811	-0.0783484	-0.097008	0.0581768
sample4	0.0382238	-0.0853782	0.0356272	-0.0441438	-0.19419	0.068482	-0.182291	0.148035	0.144959	-0.0340878	-0.226346	-0.0870462	-0.207987	-0.0571797	-0.281654	-0.0117929	0.139025	0.0911215	-0.198765	0.0822458	-0.189031	-0.173309	-0.248155	0.199927	0.235593	0.369155
sample5	-0.587387	-0.531449	-0.572608	-0.491406	-0.484725	-0.252587	-0.505414	-0.4422	-0.435879	-0.48974	-0.390044	-0.475885	-0.527359	-0.506619	-0.420379	0.420595	0.173257	0.409818	0.29376	0.453406	0.0316721	0.114524	-0.355735	0.325394	0.470571	-0.266092
sample6	-0.131395	0.175546	0.0284211	0.0697813	-0.105198	0.120897	-0.084847	-0.199336	-0.224993	0.0782425	0.180928	0.0411806	0.135662	0.136029	-0.0628165	-0.00507194	-0.191061	-0.0734411	-0.225302	0.0960526	-0.200386	0.00249576	-0.150307	-0.264768	-0.269922	-0.154413
sample7	0.264122	-0.208427	-0.0215019	-0.131385	0.064142	0.366218	0.297375	0.315013	-0.499875	-0.163704	-0.492568	-0.405678	-0.0246202	-0.213765	0.101252	-0.117854	0.199102	0.0891255	-0.102427	-0.234265	-0.296794	-0.452449	-0.354587	0.0368691	-0.261889	-0.583488
sample8	0.0561656	0.121971	0.0422873	0.156095	0.0659926	0.088357	0.0409751	0.0153671	0.0795114	0.210243	0.143995	0.0733983	0.0908332	0.134064	0.148672	0.0546013	-0.11582	-0.0797248	-0.178215	-0.0283789	-0.130926	0.0851586	0.189675	0.094194	0.00486111	-0.0641782
sample9	0.0445801	0.00279589	0.142983	0.0940172	0.0310731	0.0443679	0.145796	0.0919428	-0.0473306	0.15048	0.155616	0.219649	-0.231063	-0.0206353	0.0700453	-0.176624	-0.0264002	0.0054398	0.179419	0.116969	0.018706	0.14211	0.00162644	-0.269476	-0.407152	0.160964
sample10	0.159311	-0.026024	0.0578198	-0.100444	-0.142505	-0.541118	0.208845	0.180539	-0.0624793	0.252042	0.153077	0.220403	0.0940074	0.0501454	0.235242	-0.200473	0.217096	-0.202729	0.196219	0.0765145	0.146077	-0.439289	-0.04147	-0.247785	0.159524	0.498993
sample11	0.0493145	-0.0548445	-0.0878044	-0.161429	-0.164525	0.0454062	-0.0279852	0.151198	-0.0526455	-0.07375	-0.0844335	0.0880666	-0.0917233	-0.0381068	0.091057	-0.0223339	-0.0947286	0.140013	0.0347788	0.12953	-0.181779	-0.00667259	0.0731275	-0.0280943	0.0881082	0.069083
sample12	0.44818	0.325371	0.332556	0.319141	0.419642	-0.234373	-0.201266	-0.297784	-0.114644	-0.230325	-0.318549	-0.423573	-0.341282	-0.387837	-0.334275	0.287312	0.475028	0.354637	0.335973	-0.457641	-0.257126	-0.361307	-0.456465	-0.356968	-0.260685	0.124007
sample13	0.0231458	0.280465	-0.40065	-0.410047	-0.431372	0.111211	-0.212212	0.290325	-0.252088	0.144557	-0.289292	0.321946	0.133713	0.334533	0.429749	-0.178137	-0.272897	-0.381791	-0.019213	-0.115114	-0.0471777	-0.158421	0.352415	0.295558	-0.154214	-0.0266911
sample14	-0.00964007	-0.0452839	-0.0326426	-0.0488615	0.0531867	-0.00321296	0.0638268	-0.031915	0.133776	0.143721	0.0361707	-0.101183	0.081942	0.0160588	-0.0962517	0.00836153	0.0395581	-0.0780864	0.128635	0.0657599	0.0360663	0.0766045	-0.0131099	0.0036963	0.0640432	-0.0317569
sample15	-0.120368	0.0026537	-0.00970491	0.0937099	0.0181586	0.0479424	0.0296745	-0.108043	-0.00203827	-0.0397166	0.0617981	-0.0315553	-0.0136735	0.00173702	-0.0823488	0.1183	0.110374	-0.0223261	0.0182908	0.0557321	0.0254882	0.0552954	0.0540048	0.0289381	0.100793	-0.0351388
sample16	-0.13522	0.0323622	-0.0909054	0.34261	0.208006	-0.297204	-0.132867	-0.115142	0.0562308	0.228886	0.10425	-0.165164	0.156875	0.0792798	-0.014334	0.199622	0.0935778	-0.0531482	-0.180542	-0.0504539	-0.0589924	0.0934358	0.0350303	0.0433143	0.131484	-0.0506229
sample17	-0.0224235	-0.0973749	-0.0414803	-0.047852	-0.106498	-0.0765114	-0.00554789	-0.098212	-0.0821452	-0.128343	-0.0569239	-0.0947169	-0.112741	-0.0989739	-0.0510185	0.0309602	0.0988001	0.0694684	0.165966	0.00816044	0.0509443	0.0125151	0.000205325	0.0148038	-0.0237516	-0.0164249
sample18	-0.292059	-0.421733	0.34705	0.142221	-0.12662	0.0725396	0.214318	0.118705	-0.00882294	0.20308	0.430737	0.264732	0.0520071	-0.0641356	-0.197174	-0.527356	-0.374547	-0.393793	-0.36241	0.234657	-0.215528	-0.0440723	-0.309686	-0.289853	-0.283239	0.131346
sample19	-0.0234749	-0.00558816	-0.0152809	-0.00267618	0.0684587	0.0525206	-0.0109781	0.0212772	0.125565	-0.176634	-0.000713539	0.049993	-0.0236185	0.0851896	0.00570697	0.135446	0.0308866	0.12679	-0.146596	-0.0296889	0.123412	0.0681535	0.0657739	0.12025	0.294418	-0.0742773
sample20	0.0130431	-0.0182705	-0.0262448	-0.10399	0.147396	0.17649	0.120954	-0.0505743	0.192348	-0.0438711	0.120168	0.00814862	0.19025	0.0327129	0.0476509	0.018631	-0.026252	0.0766132	-0.0701019	0.0811119	0.000820726	0.199627	0.0383503	0.166421	-0.010959	-0.0834973
sample22	-0.207079	-0.0121768	0.0771363	-0.236334	0.276919	0.121196	-0.1365	0.0936959	0.254079	-0.0572746	0.0702222	-0.0377675	0.323209	-0.131878	0.0052246	-0.0457207	0.269747	0.125733	0.114102	-0.235727	0.0125436	0.145832	-0.161541	0.303517	-0.111083	0.105202
sample23	-0.0660033	0.233414	-0.210999	0.117993	-0.0322384	-0.0549308	0.0874236	-0.132646	0.332199	-0.136525	0.0474885	0.0250244	-0.208381	0.406639	0.353031	0.110031	-0.142844	-0.104611	-0.251857	-0.161991	-0.138747	-0.0220233	-0.179948	-0.3397	0.219633	-0.123056
sample25	0.370931	0.269856	0.173084	0.22395	0.172176	0.349626	0.433519	0.361279	0.0619252	0.285108	0.0386448	0.166447	0.408334	0.255034	0.231615	0.0730314	-0.0396206	0.145254	0.17098	0.0987445	0.278809	0.0373492	0.18623	0.284492	0.065637	-0.0532655
sample26	0.00883665	-0.0209324	0.0047833	0.0547537	-0.0582472	-0.0463991	0.0382303	0.0443673	0.000496625	0.050353	0.044093	0.0310371	-0.00493026	-0.0307047	0.0154779	-0.00292157	0.0182217	0.0729317	0.16891	0.104015	0.124384	0.133666	0.122398	-0.0157419	0.0638073	0.091311
sample27	-0.0232108	-0.127657	0.234198	-0.105279	-0.0885097	0.10028	0.0735482	0.117001	-0.131928	0.0615254	0.0579276	0.152592	-0.102079	-0.119951	0.0346837	-0.136747	-0.086396	0.143138	0.0358384	0.311292	0.113877	-0.0401063	-0.0586236	-0.0127579	-0.00717681	0.0989873

## Sheet: REST_kME
Supplemental Table S3. (B) Signed eigengene-based connectivity (kME) of a gene in each module in RNA-seq of wild-type or REST knockout cortical motor neurons in sham or SCI conditions. Related to Figure 4
ensembl_gene_id	mgi_symbol	kMEgreen	kMEyellow	kMElightcyan	kMEdarkturquoise	kMEmidnightblue	kMEorange	kMEdarkred	kMEgrey60	kMEcyan	kMElightyellow	kMEgreenyellow	kMEred	kMEbrown	kMEblue	kMElightgreen	kMEpink	kMEpurple	kMEdarkgreen	kMEdarkgrey	kMEblack	kMEmagenta	kMEroyalblue	kMEturquoise	kMEsalmon	kMEtan	kMEgrey
ENSMUSG00000000056	Narf	-0.0213494	0.284282	0.0623856	-0.0785007	-0.15786	0.116643	0.206688	0.12785	0.0436564	0.0611075	0.339752	0.533779	0.259329	0.355804	0.476704	-0.25436	-0.17636	-0.149714	0.126073	0.159358	-0.000773194	0.192472	0.469949	-0.114497	-0.0770397	0.0839353
ENSMUSG00000000085	Scmh1	0.337198	0.274706	0.276733	0.456707	0.403151	0.180583	-0.0339807	-0.0736169	-0.0577707	0.296384	-0.0379479	-0.226928	0.0558672	-0.0454242	-0.286716	0.175732	0.101495	0.0808861	-0.167428	-0.269678	-0.235005	-0.181839	-0.332036	-0.0447551	-0.438748	-0.00421691
ENSMUSG00000000142	Axin2	-0.538381	-0.116259	-0.192335	0.046785	-0.0904096	0.11134	-0.213244	-0.231108	0.170385	0.211957	0.400873	0.159319	0.231505	0.153569	-0.18138	0.0489145	-0.188027	-0.14174	-0.168227	0.375025	-0.0511534	0.770861	0.487432	0.344994	0.0775356	-0.0923707
ENSMUSG00000000149	Gna12	0.140221	-0.0884296	0.0136487	-0.502008	-0.334895	0.0404297	-0.106627	0.130962	-0.29338	-0.326722	-0.352134	0.0879278	-0.388928	-0.370012	0.0687347	0.0639108	0.155208	0.56155	0.690917	0.366046	0.481364	0.0952393	0.210767	0.159677	0.177882	0.157383
ENSMUSG00000000168	Dlat	0.0698194	0.0616046	-0.309075	-0.398425	-0.460486	-0.228026	-0.359093	0.169479	-0.356515	-0.0799207	-0.459504	0.0830807	-0.406986	-0.0936961	0.167482	0.246751	0.20275	0.204123	0.403919	0.111961	0.396903	-0.196278	0.244753	0.101468	0.224413	0.169586
ENSMUSG00000000184	Ccnd2	0.121278	0.204625	0.108289	0.312087	0.459484	-0.0050626	-0.260348	-0.451629	0.111815	-0.126368	-0.16499	-0.518116	-0.0204411	-0.201797	-0.511666	0.4995	0.362221	0.24127	-0.128974	-0.292847	-0.315496	-0.094007	-0.317304	0.108939	0.0589707	-0.103902
ENSMUSG00000000194	Gpr107	0.25696	0.110755	-0.189926	-0.168431	0.0824775	-0.190559	-0.114034	-0.0269223	0.207477	-0.396232	-0.466255	-0.264575	-0.14515	-0.161155	0.0527993	0.327799	0.39799	0.431813	0.590461	-0.191239	0.214242	0.0970751	0.0937305	0.383629	0.499007	0.055727
ENSMUSG00000000202	Btbd17	0.176929	0.320837	0.0854043	0.383614	0.117853	0.498412	0.260647	0.0995913	0.116932	-0.017046	-0.060812	0.00165753	0.079303	0.331605	0.0678258	-0.0087193	-0.357431	-0.0484882	-0.322644	-0.214	-0.283378	-0.0799863	-0.0430797	-0.112709	-0.175734	-0.254352
ENSMUSG00000000266	Mid2	0.235507	0.249141	0.464521	0.26495	0.230693	0.349302	0.0585247	0.248154	0.234024	0.130179	0.238351	0.415947	0.283954	0.116906	0.0677687	-0.216358	-0.168681	0.0174761	-0.12049	-0.106185	-0.243191	0.110021	-0.100705	0.104699	-0.294252	0.186397
ENSMUSG00000000278	Scpep1	0.643533	0.471632	0.328128	0.222138	0.330607	-0.098409	0.267644	0.362398	0.0650453	0.447535	0.00556763	0.195769	0.253149	0.171263	0.430559	-0.116647	0.216119	-0.176433	0.236569	-0.370509	-0.0368172	-0.51172	-0.230939	-0.181236	-0.335997	0.286397
ENSMUSG00000000282	Mnt	0.243453	0.160603	0.143561	0.12028	0.204718	0.262113	0.391266	0.254572	0.474824	-0.00506778	0.111757	0.09736	0.461473	0.313345	0.289898	-0.0876327	-0.200394	0.106307	-0.068952	-0.0365469	0.0492237	0.0809702	0.0719992	0.171	0.390878	-0.0773444
ENSMUSG00000000296	Tpd52l1	-0.223615	0.134326	-0.331883	-0.0664174	-0.00177222	0.0424057	-0.262907	-0.47393	-0.130798	-0.264695	-0.152866	-0.313514	-0.100253	-0.0900916	-0.151952	0.514499	0.14736	0.448457	0.246019	0.245878	0.174261	0.574394	0.560775	0.365574	0.265522	-0.319295
ENSMUSG00000000325	Arvcf	0.0793136	0.479416	-0.179926	0.30661	0.131923	-0.155868	0.165259	-0.0458693	0.341101	0.303576	0.139523	0.054116	0.441774	0.61389	0.316806	0.0299964	-0.046755	-0.509379	-0.200795	-0.359934	-0.340829	-0.148131	0.212273	-0.00649983	0.149899	-0.0293216
ENSMUSG00000000326	Comt	0.041119	0.188988	0.135995	0.312489	0.532922	0.342201	0.320401	-0.0887689	0.33416	-0.1119	0.200365	-0.116761	0.391358	0.233917	0.20236	-0.0591364	-0.107027	-0.153637	-0.196389	-0.390276	-0.214556	0.247006	-0.0140046	0.0565671	-0.166923	-0.530331
ENSMUSG00000000339	Rtca	0.543476	0.490517	0.123487	0.168082	0.13392	0.130052	0.135471	0.284886	-0.077424	0.231062	-0.143291	0.157029	0.101143	0.279228	0.302597	-0.0505978	-0.121245	0.0352085	-0.221075	-0.263629	-0.131765	-0.48608	-0.113799	-0.12987	-0.249261	0.187631
ENSMUSG00000000340	Dbt	0.227955	-0.0050973	0.453259	-0.0284558	0.0794208	0.0682989	0.194027	0.242572	0.318177	-0.0534394	0.127308	0.381599	-0.140666	-0.0296369	0.120305	-0.471454	-0.0622972	-0.151418	0.0697	-0.168903	-0.277867	-0.205063	-0.39723	-0.206846	-0.229881	0.402744
ENSMUSG00000000378	Ccm2	0.0900276	0.219128	-0.0129963	-0.0561228	0.0168378	-0.216256	0.0549312	-0.106953	-0.280052	-0.121981	-0.0708468	-0.0286326	-0.0283044	-0.0711652	0.230647	0.0919332	0.26336	0.239389	0.64598	0.0742486	0.220923	0.15015	0.350933	-0.109067	-0.050301	-0.0826813
ENSMUSG00000000409	Lck	0.242747	-0.115544	0.266947	-0.129678	-0.0504643	0.427881	0.496493	0.639411	0.139647	0.0452665	-0.0363156	0.337706	0.349095	0.151954	0.321116	-0.522816	-0.479295	-0.124657	-0.0785197	0.0475741	0.122082	-0.159709	-0.142832	0.227886	0.0693524	-0.0413284
ENSMUSG00000000441	Raf1	-0.377316	0.207832	-0.588629	-0.0217749	-0.246734	-0.228227	-0.101038	-0.318239	-0.0271228	0.179237	0.172645	0.00389947	0.000923195	0.425602	0.276936	0.334985	-0.00517915	-0.210616	-0.0126394	0.201756	0.190717	0.369632	0.776365	-0.0483212	0.249752	-0.229892
ENSMUSG00000000530	Acvrl1	0.118923	0.186421	0.205265	0.24176	-0.0287434	0.185803	0.403389	0.419568	0.0231275	0.669501	0.319273	0.458735	0.493765	0.455081	0.26382	-0.504192	-0.407288	-0.598239	-0.266534	0.0403273	-0.296092	-0.233936	-0.0578451	-0.0746665	-0.418392	0.192233
ENSMUSG00000000532	Acvr1b	0.65152	0.51445	0.23949	0.163395	0.338274	0.259434	0.211282	0.299973	-0.00672746	0.373896	-0.0590467	0.139842	0.371189	0.220485	0.150864	-0.0479533	0.138196	-0.166168	0.00656655	-0.443594	-0.131434	-0.440461	-0.214273	0.0696788	-0.454016	0.148937
ENSMUSG00000000560	Gabra2	0.0220699	0.366	0.115895	0.22426	0.142355	0.314483	0.486719	0.295682	0.468818	0.490886	0.655262	0.627436	0.779983	0.798086	0.576687	-0.47114	-0.47402	-0.660176	-0.509828	-0.0902006	-0.332741	0.0888255	0.261142	-0.0647587	-0.188602	0.00693193
ENSMUSG00000000561	Wdr77	0.246033	-0.104321	0.375808	0.280879	0.102544	0.0496552	0.475829	0.4681	-0.119967	0.685061	0.281565	0.227631	0.257041	0.0941445	0.0640286	-0.280863	-0.0542681	-0.372965	-0.114285	0.0918968	0.153579	-0.459652	-0.360959	-0.259766	-0.3332	0.193294
ENSMUSG00000000562	Adora3	0.131601	-0.018887	-0.394011	-0.127083	-0.134779	-0.393173	-0.271354	0.0532353	-0.186786	-0.0214178	-0.509543	-0.294476	-0.307137	-0.163892	-0.123828	0.460531	0.481626	0.169234	0.378037	-0.106576	0.356874	-0.237303	0.0139508	0.203557	0.385297	0.151873
ENSMUSG00000000568	Hnrnpd	-0.41491	-0.39766	-0.322012	-0.255235	-0.446644	-0.193196	-0.149883	0.0650838	-0.124982	0.372191	0.248098	0.20455	-0.135355	0.088108	0.00753506	-0.0611943	-0.105054	-0.468534	-0.345658	0.28688	0.224952	-0.0635749	0.0878488	-0.137762	-0.0263473	0.104044
ENSMUSG00000000579	Dynlt1c	0.250486	0.033801	-0.213618	-0.356391	0.0521364	0.19593	-0.310194	0.0173906	-0.0745443	-0.151835	-0.445683	-0.26499	-0.0183416	-0.243381	-0.13111	0.383191	0.327702	0.282544	0.245084	-0.199187	0.326432	0.0158831	0.0110081	0.600488	0.0983873	-0.14391
ENSMUSG00000000631	Myo18a	-0.00114429	-0.146123	-0.331688	-0.586802	-0.307176	-0.0885813	-0.0936061	0.285497	0.18495	-0.164517	-0.18729	0.22908	-0.0454963	0.0894437	0.349518	-0.104599	0.000609696	0.0212964	0.083931	0.0665925	0.190407	-0.0504482	0.082363	0.243781	0.344415	0.201328
ENSMUSG00000000632	Sez6	-0.265379	0.246183	-0.329104	-0.00495884	-0.211185	0.0124726	0.0893184	-0.216436	-0.231579	-0.0958858	-0.0129823	-0.0174691	-0.00958086	0.33533	0.417054	0.0205427	-0.321351	-0.1342	-0.0341275	0.0926136	0.027252	0.21352	0.62819	-0.0865899	0.0469774	-0.468384
ENSMUSG00000000693	Loxl3	0.443968	-0.0758602	0.602114	0.396912	0.29623	0.0573093	0.52412	0.373805	-0.0285448	0.332079	0.167474	0.105243	0.0802327	-0.149397	-0.0518955	-0.179154	0.102367	0.0996158	0.128911	0.0589585	0.142528	-0.359651	-0.490508	-0.26145	-0.267685	0.280977
ENSMUSG00000000708	Kat2b	0.188928	0.298154	-0.188021	0.0775721	0.160736	-0.198209	-0.0209054	0.14327	0.373871	0.527577	0.190579	0.199109	0.304286	0.432933	0.308156	0.074195	0.198086	-0.59789	-0.253148	-0.417691	-0.116586	-0.279347	-0.0329991	0.0125418	-0.0808874	0.221691
ENSMUSG00000000732	Icosl	-0.239435	-0.0203912	-0.163399	0.0218096	-0.158309	-0.279389	0.00220572	-0.242656	0.411079	-0.133003	0.134169	0.0601872	-0.246719	0.114721	0.00659983	0.0436545	0.0415142	-0.00386378	0.205336	0.179377	-0.0776689	0.334051	0.290953	-0.0617184	0.463107	0.259822
ENSMUSG00000000782	Tcf7	-0.017719	0.141268	0.178598	0.178709	0.18848	0.255744	0.0378471	-0.0128421	0.279246	0.135434	0.370886	0.259289	0.270555	0.134566	-0.1063	0.0246421	-0.0129416	0.170053	0.00947955	0.221023	-0.120062	0.461939	0.149775	0.0552951	-0.0946063	0.143394
ENSMUSG00000000805	Car4	0.419518	0.521396	0.421134	0.407513	0.351171	0.255133	0.214015	-0.0870328	0.164405	-0.0843306	0.0251351	0.0390094	0.105995	0.143332	-0.0157678	-0.0838307	-0.0496713	0.115844	-0.00915328	-0.321999	-0.494135	-0.157627	-0.174076	-0.174173	-0.303673	0.100251
ENSMUSG00000000827	Tpd52l2	0.314788	0.30438	0.273654	0.081187	0.0641998	0.122927	0.169582	0.0790975	0.114294	0.0314161	0.15492	0.279734	0.047869	0.0808402	0.15001	-0.168648	-0.131673	0.2422	0.103001	0.118976	-0.118106	0.0298803	0.0763665	-0.212613	-0.159486	0.330719
ENSMUSG00000000838	Fmr1	0.111862	0.295257	-0.35889	-0.106791	0.0729082	-0.279145	-0.593462	-0.311239	0.181902	-0.277446	-0.364068	-0.302857	-0.0459965	-0.0373938	-0.215725	0.632899	0.505699	0.23299	0.103143	-0.379001	-0.0455202	-0.0169518	0.106307	0.351117	0.452367	0.0836294
ENSMUSG00000000861	Bcl11a	0.464454	0.164137	0.546289	0.668147	0.468621	0.0717668	0.462962	0.181214	0.122254	0.357691	0.22605	-0.0124919	0.198589	0.0512096	-0.155819	-0.0451112	0.114077	-0.0832719	-0.171662	-0.250215	-0.151051	-0.434286	-0.512329	-0.321666	-0.278744	0.208794
ENSMUSG00000000876	Pxmp4	-0.116018	-0.117327	-0.192951	-0.0472151	0.134263	-0.312123	-0.239782	-0.351898	-0.0951303	-0.183641	-0.0162005	-0.320375	-0.378451	-0.243623	-0.133613	0.471702	0.492927	0.269528	0.15529	-0.0298941	0.332283	0.120625	0.0569202	-0.204574	0.111365	-0.131284
ENSMUSG00000000881	Dlg3	0.437826	0.272393	0.411352	0.309066	0.457743	0.181689	0.466669	0.246709	-0.0425141	0.326292	0.261578	0.0912767	0.551367	0.136259	0.261855	-0.321393	0.0295084	-0.271996	0.129738	-0.385963	-0.0811299	-0.192843	-0.210733	-0.251133	-0.662528	-0.162659
ENSMUSG00000000902	Smarcb1	0.299428	0.0731454	0.559781	0.368173	0.326235	-0.0528493	0.273243	0.016809	0.185322	0.138216	0.231747	0.0112732	-0.0319664	-0.0106258	-0.0751957	-0.200715	0.00868932	-0.0825836	-0.294144	-0.218542	-0.299302	-0.504124	-0.576822	-0.517604	-0.193462	0.240141
ENSMUSG00000000916	Nsun5	0.211905	-0.222187	0.300385	-0.169586	0.0692576	-0.0755901	-0.0631498	0.0923465	-0.118059	-0.298756	-0.157452	-0.044734	-0.202047	-0.560662	-0.161231	0.102381	0.370414	0.725807	0.593372	0.267293	0.407422	0.14494	-0.110883	0.21002	0.201292	0.277471
ENSMUSG00000000958	Slc7a7	0.126874	0.117728	0.252686	0.211474	0.0264432	0.292297	0.758674	0.505462	0.228003	0.413776	0.374447	0.487794	0.412437	0.573172	0.598717	-0.59444	-0.534186	-0.525745	-0.218458	0.0316088	-0.0668264	-0.150857	0.0395593	-0.232816	-0.182331	-0.0725162
ENSMUSG00000000959	Oxa1l	0.189076	0.261177	-0.184202	-0.0953074	0.29433	0.0720646	0.084726	-0.102472	-0.12617	-0.0650521	-0.0900091	-0.22577	0.235803	0.0382454	0.263236	0.258412	0.292255	0.125786	0.346603	-0.217205	0.243374	0.149494	0.24129	0.063202	-0.198364	-0.43816
ENSMUSG00000001016	Ilf2	0.0527389	0.525796	-0.205031	0.173832	0.385354	-0.0353841	-0.151384	-0.406956	0.166088	-0.00489526	0.092581	-0.203979	0.297513	0.261971	0.134524	0.497369	0.353197	0.0217092	0.116862	-0.326054	-0.0314403	0.302218	0.424142	0.11741	0.0349322	-0.353489
ENSMUSG00000001018	Snapin	-0.214095	-0.112288	-0.0856491	-0.197363	-0.288868	0.0499476	0.232764	0.280257	0.472022	0.183829	0.402696	0.617862	0.0859465	0.407056	0.415587	-0.31576	-0.341205	-0.259069	-0.160282	0.373082	0.0571127	0.269591	0.2967	0.00792665	0.252631	0.295971
ENSMUSG00000001020	S100a4	0.0754256	-0.553917	0.445794	-0.333885	-0.244669	0.486002	0.510896	0.533019	-0.207571	-0.0895874	0.0627822	0.289233	0.00297975	-0.321862	0.0298316	-0.549973	-0.389911	0.339212	0.171319	0.619962	0.441288	0.0199857	-0.195991	0.0947815	-0.0188548	0.0674433
ENSMUSG00000001036	Epn2	0.403337	0.019449	0.598595	0.469779	0.317273	0.183806	0.476404	0.358664	0.0192514	0.228937	0.144994	0.109056	0.199549	-0.0234577	-0.0235351	-0.249154	-0.153431	0.0630024	-0.219898	-0.0416408	-0.0795626	-0.397183	-0.491833	-0.211361	-0.202598	0.174392
ENSMUSG00000001039	B9d1	0.245403	0.581718	-0.0277379	0.505504	0.388822	-0.34178	-0.0148264	-0.0770678	0.545395	0.318207	0.138798	0.103402	0.166172	0.483504	0.213309	0.249121	0.236666	-0.256306	-0.0770027	-0.446314	-0.344156	-0.0548291	0.0733964	-0.0702764	0.119757	0.268201
ENSMUSG00000001052	Sec24b	0.55031	0.174766	0.0621212	-0.0959751	0.187347	-0.137328	0.091101	0.343633	0.043079	-0.110401	-0.387281	-0.0652279	-0.108501	-0.0444384	0.395465	-0.0458498	0.227239	0.0709748	0.207902	-0.515336	0.139222	-0.532397	-0.325184	-0.0544258	-0.000580249	0.095303
ENSMUSG00000001053	N4bp3	-0.0929229	0.15329	0.393717	0.46825	0.225719	-0.137143	0.325599	-0.0317069	0.246256	0.496359	0.719596	0.39445	0.396995	0.360031	0.0727584	-0.284081	-0.0883838	-0.410355	-0.21362	0.106603	-0.301318	0.0754769	0.0321701	-0.353981	-0.215242	0.232626
ENSMUSG00000001054	Rmnd5b	0.453398	0.578694	0.00111586	0.140492	0.00259739	-0.00263279	0.1739	0.203423	0.0796625	0.26975	0.0492865	0.309967	0.0952356	0.419995	0.482141	0.172505	0.0576284	0.133567	0.114581	-0.0145825	0.173189	-0.175523	0.345187	-0.131242	0.0651409	0.261097
ENSMUSG00000001056	Nhp2	-0.145037	-0.0212389	0.0753675	0.0233606	-0.251332	-0.0821331	-0.255304	-0.0160585	-0.188245	0.350611	0.0984512	0.159232	0.00455125	-0.0636237	-0.244652	0.0652962	-0.0491338	-0.124632	-0.114378	0.316089	-0.0325732	-0.0914576	0.043407	0.0513158	0.00408343	0.275045
ENSMUSG00000001062	Vps9d1	-0.400407	-0.237958	-0.238111	-0.277725	-0.358364	-0.102363	0.168768	0.0309538	0.146916	-0.182691	0.234373	0.295784	-0.112015	0.2272	0.35375	-0.33272	-0.322994	-0.112656	-0.0379693	0.337227	0.080824	0.315978	0.372788	-0.165503	0.283231	0.0104495
ENSMUSG00000001082	Mfsd10	0.475251	0.589725	0.0620215	0.358779	0.336512	-0.0513037	0.271111	0.155795	-0.175047	0.411053	-0.00423654	-0.0202052	0.487354	0.360369	0.417714	0.136451	0.162226	-0.160196	0.0766272	-0.365237	0.0555528	-0.351906	0.136023	-0.0330279	-0.224962	-0.151169
ENSMUSG00000001095	Slc13a2	-0.315961	0.0659475	-0.37221	0.142713	-0.00594792	-0.476736	-0.546492	-0.586616	-0.28489	-0.00667885	-0.217706	-0.505487	-0.250537	-0.178289	-0.42264	0.469051	0.351595	-0.0496983	0.0513754	-0.118713	-0.20787	0.0528581	0.103355	0.02491	0.0408702	-0.09583
ENSMUSG00000001100	Poldip2	0.102721	-0.322749	0.19735	0.105818	-0.0599895	-0.0158465	0.209526	0.243888	-0.164542	0.0692934	0.0135674	-0.0425298	-0.235324	-0.22176	-0.0244906	-0.100274	-0.0715711	0.132395	0.0334982	0.126917	0.388733	-0.154304	-0.218669	-0.303156	-0.064965	0.00091702
ENSMUSG00000001155	Ftcd	-0.0149482	-0.171658	-0.0601799	-0.179361	-0.125447	-0.245847	0.0551535	0.0475362	0.219007	0.0144425	0.00481343	0.077336	-0.0147788	-0.093493	-0.13193	0.0738283	0.303103	0.0752696	0.45037	0.249026	0.160793	0.0984425	0.0277654	0.191613	0.370009	0.370573
ENSMUSG00000001156	Mxd1	-0.263038	0.0918896	-0.245331	-0.286553	-0.422364	-0.201155	-0.489899	0.0048152	0.0201464	0.306336	0.137834	0.430065	0.0142268	0.170483	0.0115217	0.0413318	0.0228216	-0.211588	0.0229885	0.279937	-0.0217458	0.196085	0.402937	0.22405	0.141375	0.428656
ENSMUSG00000001157	Gmcl1	-0.096491	0.0428852	-0.0970628	0.188629	0.168332	0.215868	-0.121409	-0.175627	0.0686525	0.0643742	0.017983	-0.238638	0.230786	0.0157025	-0.165169	0.224728	-0.111266	0.230473	-0.147244	0.0916212	0.0229518	0.443504	0.231663	0.420162	0.114709	-0.257288
ENSMUSG00000001158	Snrnp27	0.273757	0.068479	0.332086	0.413564	0.450428	0.148399	0.464847	0.331005	0.343448	0.595931	0.470096	0.174155	0.736585	0.31137	0.0747839	-0.204987	-0.0699058	-0.350081	-0.398308	-0.14239	-0.0902343	-0.175737	-0.288815	0.0227563	-0.147429	0.098467
ENSMUSG00000001166	Oas1c	0.264987	0.123178	0.0206448	-0.120133	-0.175944	0.165116	0.516241	0.440904	-0.335217	-0.0143889	-0.177123	0.186353	0.0832996	0.248401	0.585053	-0.292648	-0.219408	-0.100178	0.140168	-0.0412464	0.259532	-0.414918	0.0939493	-0.146791	-0.0929459	-0.213524
ENSMUSG00000001173	Ocrl	-0.327401	-0.15465	0.0916903	0.00855293	-0.115611	0.0262934	0.35383	-0.152134	0.0679368	-0.0147893	0.489219	0.198445	-0.0275294	0.154261	0.18808	-0.282049	-0.297091	-0.114736	-0.0883662	0.385418	0.0619166	0.288912	0.28846	-0.423133	0.0215475	-0.119462
ENSMUSG00000001211	Agpat3	-0.0465493	0.409621	-0.50195	0.00235979	0.0446863	0.22713	0.0606508	-0.0600957	0.225302	0.192406	0.0766214	0.0470585	0.234358	0.640508	0.489829	0.261754	-0.169016	-0.304556	-0.386473	-0.200984	0.0492668	0.161115	0.523421	0.134105	0.0758873	-0.413333
ENSMUSG00000001225	Slc26a3	0.422196	0.456365	0.336011	0.227835	0.289824	0.00709189	0.248369	0.124939	0.283434	0.111415	0.102362	0.29672	0.178833	0.198896	0.217721	-0.0352321	0.198422	0.0198307	0.271558	-0.181378	-0.164439	-0.0984321	0.000410385	0.0577896	-0.0412839	0.338097
ENSMUSG00000001229	Dpp9	-0.00101992	-0.0520417	0.0790976	-0.141638	-0.112245	-0.184277	-0.07527	-0.279669	-0.0254257	-0.291012	-0.0825858	-0.117861	-0.335654	-0.311684	-0.267267	0.142288	0.305928	0.461858	0.579534	0.295243	0.0152993	0.159991	0.0228599	-0.135566	0.123364	0.266807
ENSMUSG00000001280	Sp1	0.173864	0.144635	-0.161248	0.0717618	-0.178547	0.181493	0.054753	0.0857961	-0.404662	-0.165085	-0.51294	-0.23521	-0.42917	-0.0401697	0.13349	0.222742	-0.16807	0.33573	0.157638	0.0199918	0.340042	-0.0962638	0.230817	0.0369541	0.0808128	-0.3015
ENSMUSG00000001288	Rarg	-0.233754	-0.13513	-0.199984	-0.424311	-0.0828898	0.172555	-0.303577	-0.0995991	0.249926	-0.334874	-0.0238821	0.153589	-0.0683906	-0.11453	-0.0386676	0.0547946	0.0627658	0.190676	0.150485	0.131086	0.0267583	0.564778	0.237506	0.502965	0.149044	0.0236315
ENSMUSG00000001300	Efnb2	-0.0252892	0.297949	-0.340582	0.098206	0.153281	0.238712	0.0892873	-0.0455079	0.240212	0.0153793	0.0111554	-0.0691768	0.409057	0.451674	0.38212	0.126053	-0.229094	-0.140953	-0.27736	-0.233266	0.00733327	0.318463	0.470692	0.430723	0.202146	-0.448707
ENSMUSG00000001305	Rrp15	0.163664	0.192498	0.400631	0.280513	0.195273	0.0685377	0.239702	0.124576	0.232059	-0.0150906	0.140666	0.257804	0.0485136	0.126173	0.00962977	-0.435974	-0.186049	-0.14961	-0.0221819	-0.18164	-0.543464	-0.113176	-0.300294	-0.316038	-0.283146	0.273341
ENSMUSG00000001334	Fndc5	-0.0747476	0.0463215	-0.459148	-0.250977	-0.253268	0.0775175	-0.0309013	0.0232898	-0.341363	0.19942	-0.0713886	-0.018202	0.122742	0.147823	0.147739	0.318572	0.0992229	-0.0732657	0.12826	0.174613	0.532378	0.131102	0.53655	0.277422	0.056264	-0.279298
ENSMUSG00000001366	Fbxo9	0.0698265	0.0982917	0.336291	0.0946702	0.260184	0.435382	0.0354081	0.087116	0.422112	-0.253387	0.115332	0.221186	0.122812	0.0709641	-0.00885719	-0.165092	-0.174108	0.128139	-0.200628	-0.155731	-0.282315	0.226151	-0.137836	0.204756	0.0256312	-0.00773254
ENSMUSG00000001380	Hars	0.223091	0.42807	-0.375604	-0.00631601	-0.233845	0.22956	-0.00778686	0.0703533	-0.310018	-0.037172	-0.440909	-0.088664	-0.0887232	0.320818	0.295463	0.259805	-0.230821	0.117383	-0.154025	-0.105194	0.0978858	-0.226872	0.36548	0.165486	0.0596791	-0.239123
ENSMUSG00000001419	Mef2d	-0.250719	-0.486547	-0.339925	-0.389127	-0.163849	-0.194247	-0.112811	-0.11274	-0.000889603	-0.279438	-0.190231	-0.244665	-0.319876	-0.369968	-0.232552	0.274602	0.347832	0.244127	0.405875	0.271694	0.485665	0.301737	0.100659	0.290509	0.430121	-0.026453
ENSMUSG00000001436	Slc19a1	0.0550006	-0.155973	0.0572889	-0.108547	0.060771	-0.00115869	-0.0313894	0.0723657	0.188099	-0.129857	-0.0632966	0.0318526	-0.214803	-0.140036	0.0168321	-0.203211	-0.116543	0.068032	-0.0893484	-0.0728805	-0.0627268	0.0489269	-0.193971	0.0411087	-0.0314624	0.15125
ENSMUSG00000001445	Mrpl10	0.106741	0.146522	-0.199074	-0.0206121	0.251713	-0.138965	-0.0168682	-0.130342	0.329568	-0.366678	-0.291789	-0.272395	-0.135315	-0.0150764	0.166319	0.244048	0.233404	0.279702	0.352192	-0.239396	0.0198022	0.223638	0.0922915	0.159687	0.344816	-0.136889
ENSMUSG00000001467	Cyp51	0.440795	0.32644	0.367527	0.430984	0.591799	0.0244734	0.0431063	-0.0468133	0.197628	0.0841291	-0.0413778	-0.280892	0.400006	-0.0657071	-0.177863	0.118582	0.210728	0.172289	-0.0456391	-0.400215	-0.332185	-0.22139	-0.403819	0.0702174	-0.079226	0.0513478
ENSMUSG00000001473	Tubb6	0.0170685	-0.0937618	0.430945	0.249965	-0.0402293	0.223234	0.541667	0.268151	-0.252146	0.412829	0.419037	0.258434	0.293369	0.116216	0.200655	-0.484749	-0.471258	-0.117728	-0.141646	0.399852	0.0909944	-0.060799	0.0115236	-0.339464	-0.334799	-0.0627351
ENSMUSG00000001482	Def8	0.300506	0.250406	-0.121698	0.0358778	0.173249	-0.13081	0.0586699	0.253374	-0.0727512	0.492312	0.076277	0.0694947	0.609117	0.257526	0.341223	0.0322958	0.19221	-0.385845	-0.0662536	-0.353856	0.134889	-0.291043	0.0481229	0.21604	-0.206237	-0.0223605
ENSMUSG00000001506	Col1a1	-0.0597025	0.0625148	0.0676993	-0.0288517	-0.165839	0.541705	0.262768	0.338305	0.0162423	0.0419141	0.00324435	0.286573	0.434603	0.334205	0.175691	-0.380541	-0.606272	-0.195397	-0.282497	0.121243	-0.21609	0.0581749	0.106355	0.296937	-0.0299716	-0.220036
ENSMUSG00000001525	Tubb5	-0.14631	0.0921051	-0.358337	-0.1107	-0.247593	-0.199145	-0.510432	-0.324018	-0.307616	-0.359295	-0.542887	-0.362106	-0.372881	-0.170012	-0.30042	0.395598	0.0870426	0.178659	0.0239028	-0.101739	-0.0588908	-0.0819742	0.16205	0.230377	0.328388	-0.114313
ENSMUSG00000001569	Nom1	-0.658211	-0.382168	-0.581736	-0.441443	-0.439967	-0.0264231	-0.341331	-0.187085	-0.226494	-0.0339652	0.0539874	0.00753889	0.018162	-0.0252761	-0.127401	0.000667693	-0.187148	-0.179827	-0.13128	0.391335	0.118093	0.512712	0.450325	0.330612	0.0710493	-0.211781
ENSMUSG00000001630	Stk38l	0.301008	0.234284	0.239022	-0.0763621	0.0725905	0.503061	0.567085	0.473632	-0.0724393	0.15945	0.0997481	0.38405	0.414327	0.308383	0.610278	-0.355139	-0.302026	-0.0884051	0.186808	0.0390578	0.247088	0.0178135	0.233782	0.115399	-0.267941	-0.287274
ENSMUSG00000001642	Akr1b3	0.138313	-0.26506	0.0194846	-0.459248	-0.460618	0.136192	0.0702264	0.316392	-0.432687	-0.280902	-0.426448	0.0146868	-0.3344	-0.336804	0.0502335	-0.153004	-0.0648838	0.337896	0.529859	0.269021	0.475737	-0.1633	0.00915059	0.0501874	0.0708147	-0.00256389
ENSMUSG00000001665	Gstt3	-0.0905598	-0.0110619	0.269578	-0.0321571	-0.174377	0.119114	0.326962	0.23416	0.10303	0.146256	0.473935	0.593486	0.221199	0.187084	0.38284	-0.60039	-0.364696	-0.297819	0.0993145	0.230335	-0.0937128	0.219992	0.207044	-0.231417	-0.304325	0.181277
ENSMUSG00000001666	Ddt	0.0673302	0.530758	-0.238043	0.179835	0.0527002	-0.0438041	0.254579	0.0793232	0.203096	0.313833	0.273215	0.304008	0.3609	0.74942	0.63712	0.0133583	-0.130361	-0.474235	-0.259106	-0.230512	-0.109453	-0.10987	0.408578	-0.262092	-0.0296014	-0.137238
ENSMUSG00000001674	Ddx18	0.0190121	-0.282809	-0.232854	-0.324901	-0.153442	0.197748	-0.153708	0.300292	-0.280342	-0.0249399	-0.405382	-0.138229	-0.0753285	-0.29759	0.0189696	0.0719607	-0.012154	0.232892	0.326601	0.121818	0.523671	0.229272	0.111202	0.529756	0.0104037	-0.236902
ENSMUSG00000001700	Gramd3	0.282414	0.290046	-0.219777	0.126941	0.0889305	0.123243	0.246513	0.400265	0.256332	0.323969	-0.135657	0.15153	0.254036	0.525849	0.390539	0.10114	-0.104066	-0.319101	-0.337848	-0.280489	0.069029	-0.32215	0.0471084	0.278831	0.238133	-0.0123351
ENSMUSG00000001741	Il16	0.25528	0.342249	-0.191276	0.203007	-0.0737336	-0.109095	-0.0338013	0.0525465	-0.261059	0.301737	-0.188285	-0.0260711	-0.174045	0.205001	0.142382	0.403938	0.109712	0.0880146	-0.138792	-0.00284021	0.222691	-0.342106	0.191498	-0.0124695	0.0741002	0.12057
ENSMUSG00000001751	Naglu	-0.00439594	-0.421567	0.0631227	-0.483577	-0.395362	0.304696	0.447325	0.546275	-0.0192505	-0.216878	-0.0843883	0.383228	-0.116922	-0.0504377	0.394937	-0.547097	-0.397904	0.0768186	0.225885	0.375503	0.398032	0.0580666	0.0590496	0.182434	0.154908	0.0356652
ENSMUSG00000001761	Smo	-0.143119	0.0242786	0.432778	0.374266	0.196693	-0.098874	0.264474	0.0250745	0.509702	0.439506	0.73465	0.523828	0.243956	0.29935	-0.0402213	-0.325048	-0.0984882	-0.374345	-0.32389	0.208463	-0.405365	0.10078	-0.125753	-0.263346	-0.035883	0.517379
ENSMUSG00000001763	Tspan33	-0.169569	-0.25298	0.274938	0.263772	0.0686841	-0.293721	0.275333	0.121709	0.247618	0.221559	0.385667	0.238632	-0.0868099	0.0809378	-0.00807104	-0.335701	-0.00690272	-0.398077	-0.154909	0.0377089	-0.19361	-0.178428	-0.346427	-0.448451	-0.00747466	0.308233
ENSMUSG00000001767	Crnkl1	0.148206	-0.258699	0.0484345	0.128666	0.228375	0.0139662	0.165537	-0.0186465	-0.128398	-0.248321	-0.267815	-0.435213	-0.423892	-0.327377	-0.187031	0.336924	0.217176	0.456627	0.00198974	-0.00280027	0.411926	-0.161563	-0.294362	-0.0966247	0.199648	-0.217653
ENSMUSG00000001785	Pwp1	-0.0276258	-0.30652	0.378589	0.156962	0.224254	-0.0726369	0.239266	0.228835	0.171653	0.238104	0.331287	0.166031	0.201292	-0.106336	-0.119724	-0.505841	-0.0305595	-0.388251	-0.143741	-0.0971796	-0.276112	-0.171293	-0.550571	-0.228024	-0.306569	0.24902
ENSMUSG00000001786	Fbxo7	0.226253	-0.135425	-0.125493	-0.393355	-0.349513	0.265763	0.177974	0.484174	-0.473318	0.213407	-0.288805	0.115215	0.0388295	-0.0728051	0.203172	-0.065956	-0.0801696	0.140633	0.256114	0.307894	0.648217	-0.168089	0.200346	0.401555	0.0404892	-0.00786913
ENSMUSG00000001827	Folr1	0.00345951	-0.157277	-0.0897953	-0.473091	-0.247339	-0.0882652	-0.190014	0.0287356	-0.481438	-0.280348	-0.390991	-0.142381	-0.261649	-0.37925	-0.0313411	0.104708	0.220575	0.249037	0.433085	0.137419	0.34023	-0.193759	-0.00809732	0.0240685	0.0599489	-0.105965
ENSMUSG00000001829	Clpb	0.184078	0.174003	0.10052	0.276331	0.304293	-0.486601	-0.191378	-0.231058	0.0803072	0.252967	0.185884	-0.107659	0.0486206	-0.151274	-0.198226	0.498906	0.71756	0.230204	0.367914	-0.0245584	0.190792	0.0423122	0.0296923	-0.0213988	0.113036	0.363327
ENSMUSG00000001844	Zdhhc4	0.178083	0.162501	0.427394	0.369251	0.427151	-0.328336	0.00459949	-0.0919865	0.558522	0.214652	0.564064	0.269235	0.109125	0.0529694	-0.0535009	-0.0817002	0.33645	-0.170441	-0.0392052	-0.271852	-0.312191	-0.0203149	-0.305225	-0.475829	-0.180741	0.530425
ENSMUSG00000001855	Nup214	-0.0413412	-0.0350807	-0.381063	-0.297763	-0.0508122	-0.200796	0.130976	0.131875	0.124784	0.018797	-0.0317082	0.0220319	0.219777	0.159749	0.414644	0.0693888	0.183036	-0.0968748	0.361958	0.0235326	0.422605	0.203584	0.399456	0.2778	0.378714	-0.127153
ENSMUSG00000001870	Ltbp1	0.0910603	-0.205815	0.171433	0.232253	0.39947	0.33175	0.075474	-0.114739	-0.0569517	-0.0754387	-0.0927726	-0.48498	0.105389	-0.346777	-0.460362	0.0841605	0.0742389	0.136136	-0.0497365	-0.212678	-0.0627443	0.0861146	-0.425288	0.118158	-0.352344	-0.372545
ENSMUSG00000001891	Ugp2	-0.00888462	-0.0668658	0.361611	0.0255943	-0.282271	0.113571	0.305771	0.540947	0.0494172	0.416612	0.378424	0.746467	0.123416	0.214113	0.327622	-0.506752	-0.372671	-0.201276	0.0469835	0.454977	0.146196	0.0420892	0.148026	-0.0786491	-0.035182	0.413268
ENSMUSG00000001909	Trmt1	0.103573	-0.102631	0.128106	-0.121613	-0.0390292	-0.307068	-0.0612408	0.234342	0.345572	0.156377	0.250192	0.367835	0.0373838	-0.00204406	0.122173	-0.0797504	0.242064	0.0349274	0.111927	0.110657	0.113997	-0.0557892	-0.118424	-0.0683802	0.220383	0.595857
ENSMUSG00000001910	Nacc1	0.249371	-0.0320951	0.140964	0.150945	0.00168426	-0.0961318	0.158283	0.166383	-0.0414341	-0.276561	-0.360271	-0.145685	-0.381385	-0.191893	0.0670384	0.107473	0.0111929	0.521282	0.296668	0.0788962	0.2919	-0.0958865	-0.0505582	0.00019417	0.396937	0.0770779
ENSMUSG00000001924	Uba1	0.64304	0.72868	0.246759	0.349213	0.460935	-0.0088833	0.219568	0.16866	0.385299	0.351021	0.133762	0.259587	0.261873	0.472931	0.441797	0.041871	0.176802	-0.169324	-0.0948331	-0.52221	-0.29989	-0.412251	-0.143944	-0.242491	-0.276999	0.285299
ENSMUSG00000001930	Vwf	-0.131632	-0.554333	0.158276	-0.165031	0.103451	-0.0254033	0.0372918	-0.160831	-0.074817	-0.314523	-0.0119777	-0.312749	-0.119997	-0.61284	-0.41611	0.0470849	0.207777	0.549934	0.275761	0.388942	0.313253	0.322692	-0.162717	0.285566	0.246683	0.0170541
ENSMUSG00000001942	Siae	-0.15159	-0.0708844	-0.317799	-0.491955	-0.407781	0.210523	0.0942375	0.0560434	-0.0514236	-0.339706	-0.11658	0.148251	-0.105871	0.102797	0.389834	-0.150196	-0.330969	0.236517	0.145094	0.344643	0.30634	0.348664	0.560312	0.239157	0.332323	-0.145162
ENSMUSG00000001962	Fam50a	0.530528	0.207634	0.311034	0.204506	0.450322	-0.0320375	0.283235	0.1356	-0.127938	0.398561	0.104707	-0.145169	0.342785	-0.0748334	0.0961198	0.0849128	0.382945	0.00288384	0.225527	-0.24796	0.210355	-0.373378	-0.280008	-0.185793	-0.394433	-0.0143883
ENSMUSG00000001964	Emd	0.511237	0.29454	0.465718	0.410288	0.444286	0.279392	0.560846	0.451262	0.413437	0.335518	0.301656	0.380389	0.403769	0.352078	0.265636	-0.339738	-0.111217	-0.314655	-0.250679	-0.370474	-0.24919	-0.329541	-0.379108	-0.188506	-0.337595	0.228165
ENSMUSG00000001986	Gria3	-0.264163	0.0494356	-0.387321	-0.134453	-0.237377	0.285892	0.0510702	-0.0402478	-0.239817	-0.156245	-0.164429	-0.132302	0.0326977	0.252138	0.374255	0.211497	-0.34673	0.0977638	-0.160436	0.201561	0.342637	0.230832	0.565012	0.193772	0.289669	-0.687188
ENSMUSG00000001995	Sipa1l2	0.00491311	0.307309	0.0630749	0.41338	0.306188	-0.554152	-0.278398	-0.598913	0.0472154	-0.0588804	0.119413	-0.314955	-0.0217688	-0.0964664	-0.318853	0.385219	0.494529	0.0746276	0.149522	-0.264454	-0.317204	-0.0016339	0.0095025	-0.249165	0.036651	0.15181
ENSMUSG00000001998	Ap4e1	-0.0749882	-0.402454	-0.0975241	-0.461652	-0.478619	0.155409	0.126161	0.491903	-0.573434	0.322367	-0.0507513	0.234313	0.127016	-0.182985	0.20681	-0.281518	-0.182607	-0.0678541	0.284224	0.50781	0.625571	-0.0124464	0.187088	0.232222	-0.190394	-0.0488953
ENSMUSG00000002006	Pdzd4	-0.217737	0.0974046	-0.117949	-0.15642	-0.330949	0.446647	0.0419945	-0.0315599	-0.109455	-0.209534	0.0103361	0.224674	0.00801851	0.155919	0.140458	0.022679	-0.387833	0.311274	0.0474457	0.49424	0.156728	0.508075	0.637005	0.326545	0.2328	-0.189032
ENSMUSG00000002017	Fam98a	-0.0408481	0.338809	-0.0047764	0.346974	0.383333	-0.261631	-0.408058	-0.524219	0.436722	-0.0395105	0.102473	-0.274479	0.00663274	0.0809273	-0.363689	0.338231	0.345854	-0.114478	-0.172017	-0.459403	-0.638006	0.0136911	-0.223547	-0.239027	-0.00961672	0.106451
ENSMUSG00000002031	Ift46	-0.558166	-0.328754	-0.255039	0.105944	-0.184833	-0.197241	0.0604972	-0.365343	-0.0718581	0.0942471	0.318279	-0.13489	-0.196753	0.0496516	-0.235333	0.167897	-0.0214133	-0.130993	-0.192125	0.427039	0.124373	0.289135	0.251969	-0.225361	0.197153	-0.138713
ENSMUSG00000002033	Cd3g	0.528549	0.348288	0.360525	0.45576	0.688143	-0.0695577	0.0400835	0.081657	0.457487	0.194928	0.0751187	-0.0096763	0.234833	0.0107753	-0.087018	0.182147	0.446838	0.0367294	0.0830536	-0.54797	-0.194167	-0.102445	-0.385633	0.10523	-0.168119	0.277788
ENSMUSG00000002043	Trappc6a	0.0832349	0.20982	0.0113012	-0.120363	-0.134598	0.24146	0.411651	0.261124	-0.0812157	-0.00301514	0.0480684	0.317975	0.0662963	0.372336	0.56669	-0.27435	-0.275695	-0.168489	0.095384	0.0326691	0.0616595	-0.0983626	0.218956	-0.27191	-0.191075	-0.228369
ENSMUSG00000002105	Slc39a13	0.299787	0.2781	-0.0817726	-0.104542	-0.103311	0.108217	-0.0524742	0.311114	0.000790302	0.432526	0.0238296	0.309184	0.266565	0.333811	0.190653	-0.074558	-0.0758717	-0.297775	-0.277855	-0.178803	0.00558259	-0.328047	0.0398228	0.137038	-0.160195	0.255359
ENSMUSG00000002129	Sf3a1	0.0435435	0.250338	-0.239549	-0.063448	-0.0767896	-0.428458	-0.112749	-0.181497	-0.120781	-0.0347618	-0.0529747	-0.0245661	-0.318679	0.0643369	0.324437	0.222643	0.296263	0.0340417	0.401517	-0.0787488	0.186673	-0.0167372	0.310991	-0.418529	-0.0363009	0.0223099
ENSMUSG00000002147	Stat6	-0.00279832	0.118005	-0.104921	0.348942	0.368703	-0.512393	0.0302282	-0.379711	0.238371	-0.124648	0.0582069	-0.368642	-0.155078	-0.0188391	0.0551097	0.335227	0.419025	0.11557	0.255068	-0.248241	0.0511675	0.167305	0.102114	-0.241029	0.259851	-0.0766169
ENSMUSG00000002190	Clgn	0.10498	-0.161058	0.0755767	0.00447501	-0.197564	0.315828	0.542418	0.662004	-0.103007	0.312513	0.0493945	0.37842	0.0535769	0.260705	0.49622	-0.321862	-0.417541	-0.226224	-0.190214	0.213547	0.427525	-0.234761	0.0363295	-0.0043686	0.0205522	-0.0828862
ENSMUSG00000002205	Vrk3	0.39286	0.312026	0.262072	0.0640685	0.245076	0.198006	0.253599	0.50659	0.363672	0.649916	0.342442	0.572845	0.629738	0.384818	0.320422	-0.224769	0.0398278	-0.316743	0.0293469	-0.072051	-0.00685898	-0.0252928	0.0028415	0.290251	-0.217289	0.379954
ENSMUSG00000002210	Smg9	0.016768	-0.00262766	0.221971	0.234952	0.0171671	0.134569	0.611745	0.441442	0.262713	0.441914	0.407831	0.503282	0.236816	0.458414	0.45446	-0.519343	-0.410621	-0.53465	-0.275047	0.0827557	-0.0582431	-0.112889	-0.00532186	-0.175423	-0.0876072	0.125409
ENSMUSG00000002221	Paxip1	-0.00239978	-0.491979	0.132292	-0.155995	-0.0885735	0.12041	0.477255	0.361323	-0.0877615	0.0961858	0.166998	0.0514234	0.244521	-0.180211	0.101895	-0.24276	-0.133337	0.206772	0.205281	0.489625	0.6301	0.172381	0.0736834	0.183494	0.26507	-0.0536858
ENSMUSG00000002233	Rhoc	0.0893382	-0.132889	0.489057	0.0773823	-0.170388	0.487074	0.599881	0.666444	-0.09363	0.246064	0.2492	0.618059	0.267502	0.199118	0.336226	-0.742786	-0.676323	-0.178054	-0.201998	0.343363	-0.0193787	-0.125938	-0.113568	-0.0537002	-0.273188	0.104887
ENSMUSG00000002250	Ppard	0.268358	0.000438311	0.190593	0.0828745	0.112846	0.141994	0.281757	0.330805	0.00826813	0.333205	0.0201547	0.109179	0.175103	0.073526	-0.0828443	-0.00942867	0.0840908	-0.10174	-0.057988	0.0334438	0.104737	-0.353491	-0.289072	0.0108368	-0.0335526	0.166694
ENSMUSG00000002257	Def6	-0.127271	-0.0701055	-0.405162	-0.224593	-0.319345	-0.121959	-0.293138	0.0624371	-0.368538	0.236424	-0.176772	0.00516933	-0.0754979	0.0611279	-0.0470986	0.276004	0.0803683	-0.141792	-0.295404	0.119096	0.223151	-0.274017	0.113694	0.218624	0.0997892	0.0523336
ENSMUSG00000002265	Peg3	-0.575905	-0.0740666	-0.54501	-0.235876	-0.386817	0.250449	-0.0882643	-0.148468	0.0336693	-0.0856407	0.0825887	0.0749467	0.218206	0.337191	0.197168	0.0394774	-0.49685	-0.0659706	-0.216163	0.424007	0.10441	0.701876	0.786971	0.470763	0.371868	-0.436958
ENSMUSG00000002279	Lmf1	-0.187743	-0.00427565	-0.107147	-0.252666	0.0119603	-0.147257	-0.0512106	-0.0622009	-0.0289129	-0.113732	0.170151	0.138677	0.298458	0.0338848	0.303283	-0.131387	0.110726	-0.0866578	0.220579	-0.000498957	0.0708783	0.294891	0.319537	0.181717	0.019617	-0.12586
ENSMUSG00000002280	Narfl	0.195486	0.365549	0.0340746	0.234043	-0.0206147	-0.17128	0.0201708	0.345717	0.163155	0.692815	0.285383	0.501066	0.350953	0.463311	0.284705	0.0198604	0.0141113	-0.333673	-0.08443	0.028094	0.067953	-0.116179	0.23639	0.0167407	0.0241944	0.418388
ENSMUSG00000002289	Angptl4	-0.305275	0.100092	-0.348845	0.157442	-0.101631	-0.184639	-0.173955	-0.3928	-0.0969636	0.173824	0.198496	-0.14102	0.0644174	0.123283	-0.157096	0.423067	0.147492	0.0528574	0.05468	0.288149	0.140712	0.413006	0.545665	0.0421298	0.184151	-0.0830421
ENSMUSG00000002297	Dbf4	-0.0460303	-0.184879	0.0515399	0.137439	0.256432	-0.695752	-0.342547	-0.41983	-0.00357843	0.051646	0.0950465	-0.343336	-0.221356	-0.485726	-0.50085	0.255808	0.716658	0.0497735	0.392155	-0.144741	-0.0677372	0.0159893	-0.317051	-0.235965	-0.135017	0.358613
ENSMUSG00000002308	Cd320	-0.22283	-0.0223744	-0.252337	0.148889	0.213278	0.291417	0.0507589	-0.268533	-0.117963	-0.0184037	0.0493249	-0.378931	0.236421	0.041929	-0.0846707	0.409519	-0.0447977	0.21123	-0.153141	0.157693	0.268665	0.480117	0.363243	0.286427	0.0865245	-0.66641
ENSMUSG00000002319	Ipo4	0.468277	0.258084	0.390304	0.235951	0.347774	-0.186865	0.0923584	0.074679	0.308807	0.375569	0.26518	0.214591	0.122933	-0.00218525	-0.121581	0.141207	0.521093	0.055444	0.251447	-0.114009	0.0233062	-0.176864	-0.215236	-0.0448933	-0.0637061	0.616046
ENSMUSG00000002320	Tm9sf1	0.0771837	0.0133831	-0.0121369	0.157636	0.484825	-0.29	-0.174105	-0.441833	0.280898	-0.43734	-0.21931	-0.569304	-0.347152	-0.327508	-0.230151	0.350757	0.478493	0.329038	0.290944	-0.410995	-0.098223	0.149932	-0.245074	-0.103545	0.143969	-0.146074
ENSMUSG00000002329	Mdp1	-0.215141	-0.247684	-0.242794	-0.060289	-0.172701	-0.204634	-0.209957	-0.195971	-0.425649	-0.0581001	-0.246163	-0.383342	-0.221154	-0.244716	-0.229556	0.4065	0.247698	0.0833667	-0.0633283	0.106771	0.301792	-0.210045	-0.00256197	0.154213	0.260251	-0.20979
ENSMUSG00000002342	Tmem161a	-0.00487097	-0.0326402	-0.382559	-0.322344	-0.00161203	-0.312291	-0.259703	0.0537581	0.162638	0.178611	-0.0011315	0.0838122	0.155435	0.057607	0.10607	0.0893025	0.318306	-0.17219	0.0952551	-0.124744	0.147252	0.114714	0.149069	0.379242	0.128567	0.253827
ENSMUSG00000002365	Snx9	0.23917	0.398856	-0.0196135	-0.0136727	-0.165698	-0.0323434	-0.0342765	-0.0256765	0.158252	-0.0770967	-0.161128	0.112145	-0.1013	0.195946	0.143883	-0.0156457	-0.103112	0.0546166	0.0917559	-0.0759834	-0.262565	-0.185802	0.11553	-0.112948	0.14309	0.300538
ENSMUSG00000002393	Nr2f6	0.33101	0.0440748	0.289499	0.153695	0.20744	-0.146576	-0.147428	0.0994852	0.0242913	-0.0691294	-0.14357	-0.0981591	-0.0140015	-0.228213	-0.182844	0.16408	0.347088	0.224822	0.065763	-0.286053	0.0324441	-0.338932	-0.38737	0.0200092	0.0951259	0.231037
ENSMUSG00000002413	Braf	-0.572877	-0.249461	-0.144772	0.145798	-0.151568	-0.399821	-0.345179	-0.697152	0.237029	-0.280545	0.224462	-0.225438	-0.501441	-0.173574	-0.532925	0.374488	0.180899	0.161787	-0.106796	0.324702	-0.205433	0.369023	0.100216	-0.262343	0.424831	0.16726
ENSMUSG00000002459	Rgs20	-0.04872	-0.09673	0.151473	-0.0800148	-0.35951	0.312821	0.0403699	0.450636	-0.218808	0.373507	0.0803012	0.468383	-0.02273	0.141551	0.156676	-0.402641	-0.531329	-0.236797	-0.272816	0.281961	0.0525107	-0.0982353	0.0126803	-0.0191899	-0.302959	0.105023
ENSMUSG00000002486	Tchp	0.0649496	-0.0587263	0.042254	-0.318979	-0.168415	0.582447	0.195254	0.450219	0.0384511	0.181498	0.0862386	0.427524	0.0974634	0.222288	0.338718	-0.414816	-0.464299	-0.263776	-0.269438	0.0592526	0.0770139	-0.0138245	-0.012495	0.065521	-0.375679	-0.114222
ENSMUSG00000002489	Tiam1	0.374981	0.281445	0.158387	-0.163088	-0.10236	0.427662	0.444204	0.523337	0.0763442	0.0443699	-0.0329563	0.409872	0.239008	0.363475	0.645498	-0.501852	-0.416146	-0.135017	0.0565684	-0.113326	-0.0314351	-0.237496	0.044838	-0.113688	-0.219887	-0.0254651
ENSMUSG00000002504	Slc9a3r2	-0.047864	0.343852	0.265647	0.507497	0.106975	-0.410706	-0.0445818	-0.127035	0.362687	0.366355	0.399733	0.312255	0.00170643	0.357917	0.0265834	-0.157993	-0.0469457	-0.403081	-0.26058	-0.121616	-0.601262	-0.170924	-0.0882091	-0.483435	-0.0140291	0.508736
ENSMUSG00000002524	Puf60	0.466877	0.415922	0.124133	0.0811579	0.103679	0.496015	0.597015	0.504373	0.116005	0.447426	0.15574	0.423003	0.515475	0.542462	0.526997	-0.28964	-0.358694	-0.246752	-0.154161	-0.0380461	0.0682276	-0.173319	0.179857	0.114852	-0.22897	0.00671769
ENSMUSG00000002550	Uck1	-0.132073	0.0705867	-0.305157	-0.33456	-0.548181	-0.014307	0.017383	0.166973	-0.0687272	0.121638	0.0222798	0.413787	-0.222585	0.293545	0.355723	0.0265738	-0.203787	0.00749957	0.0961383	0.492139	0.330141	0.0817533	0.544425	-0.0624532	0.290412	0.19758
ENSMUSG00000002580	Mien1	-0.176497	-0.525404	-0.0134755	-0.141028	-0.106388	-0.00589866	0.205083	0.126179	-0.0956307	-0.0257039	0.0335448	-0.147209	0.168367	-0.212409	-0.282777	-0.166831	-0.0593399	-0.029509	-0.0523795	0.245238	0.194242	-0.0381382	-0.208882	0.115793	0.20843	-0.0489103
ENSMUSG00000002603	Tgfb1	-0.0924485	-0.256254	0.219222	0.139123	0.273811	-0.299731	0.0610001	-0.243834	0.192189	-0.142746	0.216639	-0.19882	-0.172271	-0.268443	-0.286069	-0.108297	0.200129	0.0882419	0.023259	-0.0112368	-0.240667	-0.00199536	-0.436045	-0.487891	-0.0823256	0.1678
ENSMUSG00000002635	Pdcd2l	0.363071	0.168372	0.15442	0.113988	0.186366	0.306669	0.452655	0.312945	-0.0700856	0.211132	0.118091	0.103304	0.211188	0.223934	0.389852	-0.0884452	-0.08874	-0.0112274	0.0178795	-0.127359	0.339036	-0.119089	0.0498308	-0.196773	-0.300281	-0.270894
ENSMUSG00000002660	Clpp	0.0108918	0.0208508	0.26001	0.231548	0.0656863	-0.0198374	0.431066	0.414155	0.0191503	0.565209	0.466111	0.478235	0.434777	0.372761	0.427957	-0.578059	-0.350604	-0.586256	-0.324906	0.0182172	-0.148976	-0.20868	-0.0825044	-0.259014	-0.354777	0.128775
ENSMUSG00000002661	Alkbh7	-0.0697867	0.29512	-0.206723	0.156277	0.128836	-0.245476	0.164724	-0.0302697	0.246914	0.0942406	0.203353	0.11315	0.31751	0.475136	0.463201	-0.0917712	-0.0443719	-0.349641	-0.0745248	-0.233436	-0.219178	0.0561796	0.260568	-0.181735	0.0723651	-0.100015
ENSMUSG00000002668	Dennd1c	0.661164	0.268982	0.194929	-0.239482	0.0057129	0.162088	0.192058	0.565507	-0.161708	0.271155	-0.212183	0.289803	0.229033	0.011111	0.376813	-0.207466	0.150027	-0.0504147	0.428444	-0.227011	0.223041	-0.461688	-0.161991	0.107109	-0.396099	0.246903
ENSMUSG00000002688	Prkd1	-0.178897	0.108901	0.0621851	0.137519	0.113731	0.434972	-0.000734005	-0.182163	0.0855233	-0.413103	-0.00890211	-0.0348825	-0.129428	0.0956387	-0.0198249	0.0191462	-0.326542	0.262337	-0.180994	-0.000518481	-0.184202	0.427495	0.174265	-0.0216474	-0.0381605	-0.440339
ENSMUSG00000002718	Cse1l	0.579746	0.179782	0.440916	0.18325	0.455049	0.326045	0.577911	0.329212	0.248266	-0.193248	-0.102534	-0.0415666	0.112219	0.0177158	0.284939	-0.089565	-0.00360203	0.455081	0.208034	-0.149509	0.179424	-0.159354	-0.250327	-0.0789807	0.115161	-0.097851
ENSMUSG00000002732	Fkbp7	0.316022	0.27269	-0.00955865	-0.200946	0.191428	-0.24086	-0.123459	-0.00796215	0.379739	-0.0867714	-0.0389268	0.107982	0.223867	0.0477633	0.0472495	0.0208403	0.406728	-0.0473046	0.241822	-0.353272	-0.231358	-0.153	-0.122956	0.154283	0.125318	0.427953
ENSMUSG00000002733	Plekha3	0.294861	0.512581	0.213699	0.523838	0.471767	-0.338373	0.150121	-0.174015	0.462709	0.212524	0.326832	0.0592497	0.0808368	0.330248	0.253452	0.0211894	0.176649	-0.232713	-0.06326	-0.465198	-0.424387	-0.169125	-0.135014	-0.629018	-0.234504	0.207905
ENSMUSG00000002767	Mrpl2	-0.00955352	0.121659	-0.243868	-0.013982	-0.133458	-0.110246	-0.0743469	0.0148434	-0.174348	0.390481	-0.0608406	-0.0465467	0.262373	0.202293	-0.0758115	0.139669	0.0262228	-0.230773	-0.120811	0.0731155	-0.0486903	-0.206904	0.0879922	0.169513	0.0177383	0.0572935
ENSMUSG00000002781	Tmem143	0.282758	0.364841	0.311849	0.5366	0.53373	-0.202393	-0.0725577	-0.128925	0.292931	0.478634	0.367104	0.0334191	0.342951	0.0985862	-0.165667	0.385884	0.523947	-0.00865036	0.0203825	-0.217118	-0.0691601	0.0124567	-0.0861735	0.0389672	-0.0781512	0.292153
ENSMUSG00000002791	Pdxk-ps	0.195328	0.18854	-0.0128957	0.121186	0.28499	-0.381986	-0.214716	-0.178081	0.430162	-0.0152698	0.0143133	-0.08665	-0.0975511	0.0772982	-0.127298	0.334363	0.418563	0.0732924	-0.194573	-0.307048	-0.179188	-0.255151	-0.251815	-0.0799624	0.337648	0.382034
ENSMUSG00000002808	Epdr1	0.433565	0.260134	-0.0288092	-0.12406	-0.115973	0.59265	0.31562	0.61074	-0.133232	0.369593	-0.147361	0.312566	0.310044	0.378717	0.416588	-0.0378593	-0.293117	-0.10946	-0.230255	-0.00988559	0.340633	-0.345735	0.109336	0.286953	-0.114387	-0.116169
ENSMUSG00000002820	Atg4d	0.162462	0.144387	0.0975349	0.127872	0.330308	0.398176	-0.00240364	-0.103934	0.114796	-0.452349	-0.287592	-0.316804	-0.203323	-0.116297	-0.0677007	0.225767	0.0118701	0.354037	0.0379484	-0.321849	-0.019176	0.120496	-0.127779	-0.00547452	-0.0180972	-0.459323
ENSMUSG00000002825	Qtrt1	-0.202057	-0.0130718	0.108891	0.267717	0.242888	-0.283823	-0.0025256	-0.141351	0.42813	0.422289	0.63658	0.169985	0.385958	0.230878	0.0100636	-0.0819319	0.119693	-0.555659	-0.330726	-0.148616	-0.258694	0.0622366	-0.0962998	-0.266136	-0.103832	0.148297
ENSMUSG00000002831	Plin4	-0.085689	-0.0538211	0.35646	0.423761	0.0110297	0.0942691	0.0976906	0.169207	0.0693445	0.583648	0.482503	0.371072	0.137257	0.131692	-0.0880556	-0.159491	-0.244026	-0.262819	-0.360692	0.254725	-0.053875	0.0580353	-0.0522825	-0.105393	-0.239637	0.248784
ENSMUSG00000002845	Tmem39a	-0.336863	-0.382416	-0.183111	-0.439122	-0.481844	0.0118317	-0.0299643	0.105438	-0.123443	-0.29752	-0.13298	0.0944538	-0.124461	-0.065226	0.034339	-0.274406	-0.295077	-0.11592	0.0154838	0.223956	0.0668113	0.025051	0.0543577	0.0220397	0.182331	-0.124008
ENSMUSG00000002870	Mcm2	-0.247784	0.170482	-0.48056	-0.166235	-0.284693	-0.175864	-0.397147	-0.108744	0.0363536	0.210621	0.128583	0.248618	0.0643206	0.305467	0.125089	0.412894	0.168786	-0.0807119	-0.116152	0.193279	0.178675	0.247438	0.563686	0.276157	0.27879	0.151413
ENSMUSG00000002881	Nab1	0.409616	0.540344	0.262751	0.229942	0.232212	0.349213	0.286415	0.465627	0.170725	0.448947	0.171304	0.515451	0.372206	0.488184	0.562503	-0.31705	-0.24298	-0.385441	-0.110087	-0.318395	-0.190516	-0.1656	0.0387619	-0.0505351	-0.475903	0.0585952
ENSMUSG00000002885	Adgre5	-0.384366	-0.280001	0.229483	-0.0315697	-0.418723	0.0261412	0.227485	-0.023023	0.0100008	-0.0573329	0.365101	0.365687	-0.205859	0.0124425	-0.0146676	-0.292078	-0.33557	0.0848093	0.10935	0.69201	0.0895522	0.307993	0.270788	-0.246238	0.231371	0.178121
ENSMUSG00000002897	Il17ra	0.290339	0.0269365	0.300606	0.0351936	0.281641	-0.215619	-0.0718305	-0.0296193	0.0567377	-0.181824	-0.165213	-0.240876	0.141817	-0.305879	-0.148354	-0.000591067	0.346568	0.241715	0.351067	-0.274892	-0.112713	-0.204109	-0.379409	0.0514193	0.0435482	0.117667
ENSMUSG00000002910	Arrdc2	-0.245992	0.256889	-0.231882	0.392007	0.105557	-0.356757	0.0524682	-0.397066	0.227023	0.196637	0.33805	-0.0836981	0.157809	0.36817	0.136263	0.232257	0.0390404	-0.108354	-0.0261156	0.0844281	-0.0946691	0.38869	0.518553	-0.120056	0.261401	-0.0606418
ENSMUSG00000002944	Cd36	0.219948	-0.0787643	0.531096	0.188782	0.416891	-0.0616326	0.215904	0.106134	0.326351	0.0561376	0.19852	0.0906586	0.0585609	-0.156534	-0.167841	-0.352683	0.0819516	-0.000638047	0.0108956	-0.129825	-0.347247	-0.146563	-0.58728	-0.212047	-0.19768	0.358503
ENSMUSG00000002948	Map2k7	-0.0565634	0.131874	-0.248427	0.0176258	-0.0502648	0.0201114	-0.0509984	0.0861408	0.395569	-0.00839421	-0.082292	0.099984	0.00777877	0.365669	0.242211	0.12384	-0.111632	-0.253999	-0.36009	-0.209706	-0.118902	-0.0887352	0.0736487	0.209378	0.399531	-0.0115565
ENSMUSG00000002949	Timm44	0.0235907	0.314977	-0.0763305	0.424493	0.377284	0.155775	0.120229	-0.140834	0.14386	0.16815	0.162481	-0.182795	0.400908	0.356987	0.149099	0.270117	-0.0117903	-0.218888	-0.375953	-0.34011	-0.146599	0.0189557	0.0764236	-0.0260608	-0.119807	-0.472885
ENSMUSG00000002963	Pnkp	-0.0682981	0.056359	0.123447	0.205183	0.114306	-0.170578	0.13297	-0.1054	0.446989	0.0729914	0.276967	0.127645	0.179903	0.200551	0.00282849	-0.00881231	0.002454	-0.000248015	-0.148752	0.135185	-0.176056	0.131944	0.0877769	0.170468	0.486865	0.306489
ENSMUSG00000002968	Med25	-0.531815	-0.229512	-0.170902	-0.00759715	-0.248153	-0.328493	-0.259535	-0.219306	0.15324	0.353883	0.541742	0.315449	0.0871011	0.119214	-0.234847	-0.0392012	0.038555	-0.326068	-0.211765	0.395844	-0.130276	0.392929	0.263552	0.0439159	0.0838195	0.41476
ENSMUSG00000002981	Clptm1	0.192148	-0.132151	0.533699	0.16189	0.0995746	0.0669327	0.490213	0.205861	0.0539637	-0.189191	0.138327	0.149113	-0.133358	-0.184804	0.0931758	-0.428854	-0.12102	0.189138	0.318541	0.102105	0.0672928	-0.0378743	-0.204751	-0.373536	-0.0483025	0.143065
ENSMUSG00000002983	Relb	0.0726976	0.408116	0.0638428	0.0779061	-0.0428722	-0.0582812	0.0957721	0.183134	0.53237	0.457206	0.45159	0.651416	0.339927	0.601927	0.358118	-0.138973	-0.0553381	-0.324489	-0.053847	0.0973572	-0.241052	0.0981124	0.282103	-0.0277862	0.100526	0.507385
ENSMUSG00000002984	Tomm40	-0.379258	-0.222612	-0.159418	-0.169795	-0.103114	0.44628	-0.0347833	0.0591741	0.0971426	-0.105198	0.100143	0.126336	0.315671	0.0586716	-0.0590018	-0.0591565	-0.282097	-0.0157622	-0.0564448	0.254549	0.0833019	0.650257	0.330117	0.572995	0.0848045	-0.361025
ENSMUSG00000002985	Apoe	0.225591	-0.0519389	0.153936	0.101373	0.351782	-0.478636	-0.313437	-0.221491	-0.0407391	0.0340556	-0.0662735	-0.304745	-0.175632	-0.511712	-0.447755	0.529559	0.889497	0.397435	0.522351	-0.0887726	0.276369	-0.0493113	-0.262381	0.0555669	0.0962525	0.344956
ENSMUSG00000002996	Hbp1	0.368864	-0.0234768	0.464815	0.266258	0.113499	-0.0189731	0.0834438	0.266729	-0.190784	0.46848	0.0859857	0.116754	-0.102127	-0.181269	-0.257057	-0.213291	0.0558525	-0.21391	-0.135624	-0.140965	-0.100474	-0.580528	-0.605824	-0.395797	-0.565027	0.406004
ENSMUSG00000002997	Prkar2b	-0.421259	-0.0116411	-0.142818	0.0221004	-0.302749	0.180143	-0.110095	-0.0562329	0.106781	0.00447574	0.115996	0.247402	0.121936	0.244808	-0.0862647	-0.145986	-0.379998	-0.214991	-0.117993	0.239973	-0.253649	0.455149	0.381924	0.319502	0.135562	-0.0411301
ENSMUSG00000003032	Klf4	-0.466656	-0.408433	-0.192131	-0.220094	-0.271629	0.0585167	-0.107424	-0.00455079	-0.119212	0.190905	0.258192	0.180712	0.0724468	-0.096967	-0.146466	-0.0168706	-0.132038	0.0885946	-0.0193099	0.666094	0.296493	0.582292	0.369349	0.385279	0.123025	0.0537614
ENSMUSG00000003038	Hmgn2	0.208096	-0.0210379	0.181124	-0.119082	0.137815	0.56187	0.264837	0.237593	0.180992	-0.253088	-0.106959	-0.00934756	0.345223	-0.00955459	-0.0448828	-0.0947037	-0.148699	0.302514	0.0974972	0.0294913	0.0509678	0.146726	-0.095394	0.334387	0.115858	-0.216207
ENSMUSG00000003039	Fam32a	0.132789	-0.0710327	-0.136247	-0.245845	0.00289072	0.000344913	0.0275214	0.0780783	-0.0373864	-0.260303	-0.409336	-0.193441	-0.227795	-0.249959	0.0998199	0.226796	0.2111	0.529037	0.561289	0.196367	0.42659	0.214306	0.174128	0.420067	0.395031	-0.0392151
ENSMUSG00000003062	Stard3nl	0.363246	-0.139798	0.36489	-0.269714	-0.210839	0.590143	0.64039	0.79366	-0.178374	0.171112	0.0658527	0.539964	0.335777	0.104459	0.400602	-0.680447	-0.49764	-0.0164336	0.0210479	0.282494	0.276978	-0.256432	-0.118703	0.0860919	-0.2707	0.104277
ENSMUSG00000003068	Stk11	0.198158	-0.215017	-0.0592038	-0.538528	-0.274901	0.40245	0.129024	0.544594	-0.469018	0.111098	-0.284284	0.153316	0.151696	-0.173557	0.176471	-0.0669427	-0.0340647	0.184647	0.28405	0.307541	0.675765	-0.111823	0.10274	0.473286	-0.03629	-0.129807
ENSMUSG00000003119	Cdk12	-0.00812902	0.131698	-0.0524214	-0.23543	-0.071722	0.208073	-0.164329	0.271295	0.1207	0.292296	0.181531	0.454405	0.251755	0.211527	0.303051	-0.0779221	-0.0655062	-0.123806	0.0336152	0.103128	0.124789	0.277606	0.275271	0.257395	-0.160257	0.080018
ENSMUSG00000003154	Foxj2	0.166583	0.299535	0.505221	0.193945	0.14347	-0.173546	-0.0213075	0.0346218	0.341106	0.286495	0.542099	0.579619	0.213327	0.137706	0.0730988	-0.390426	0.0564474	-0.233396	0.0396676	-0.0684664	-0.484764	-0.0211082	-0.125702	-0.34046	-0.357801	0.680019
ENSMUSG00000003200	Sh3gl1	-0.0478215	-0.056031	-0.0956969	-0.0415369	0.106129	-0.0949855	0.232559	-0.237105	-0.160905	-0.220379	-0.0300194	-0.319672	-0.0444292	-0.120514	0.133751	0.0795524	0.19708	0.128547	0.406988	-0.00768993	0.260252	0.170264	0.207552	-0.0741182	0.0306388	-0.374046
ENSMUSG00000003206	Ebi3	0.23256	0.0858802	0.338302	0.0690334	-0.223749	0.327754	0.665505	0.623645	-0.00737835	0.488155	0.27922	0.625724	0.237839	0.424806	0.521938	-0.698794	-0.605685	-0.497378	-0.234929	0.166644	-0.0655581	-0.413705	-0.0764162	-0.298616	-0.343285	0.212455
ENSMUSG00000003226	Ranbp2	0.352353	-0.00191946	0.769363	0.298365	0.21514	0.172201	0.459536	0.301526	0.000801808	0.147556	0.347799	0.348629	0.130973	-0.128854	0.0586513	-0.399168	-0.0884524	0.239486	0.0976201	0.201859	-0.000433153	-0.14836	-0.307421	-0.26316	-0.274851	0.358625
ENSMUSG00000003235	Eif2b5	-0.326238	-0.185569	-0.116486	-0.206597	-0.116409	-0.172175	-0.126823	-0.241153	0.183176	-0.254281	0.254569	0.0634701	0.0722075	-0.0949436	-0.029458	0.102711	0.10706	0.377948	0.263094	0.439314	0.24661	0.644689	0.476149	0.208967	0.515269	0.087554
ENSMUSG00000003269	Cyth2	-0.0279898	-0.0359032	0.134192	-0.0724842	-0.0940611	0.506499	0.291833	0.100424	0.111811	-0.432476	-0.0837871	0.0667867	-0.135659	0.0869138	0.107646	-0.244495	-0.492063	0.277796	-0.1223	0.174309	-0.124608	0.124021	-0.0176984	-0.167395	0.0733513	-0.253758
ENSMUSG00000003273	Car11	0.095628	0.0014904	0.345351	0.0176412	-0.166391	0.376064	0.666171	0.453745	-0.0822765	0.304903	0.393058	0.55869	0.360203	0.307398	0.479579	-0.705396	-0.615893	-0.248835	-0.052843	0.331345	0.0812966	0.0324207	0.20031	-0.132328	-0.317232	0.014258
ENSMUSG00000003282	Plag1	0.318938	0.0715143	0.273315	0.0244154	0.471153	-0.342798	-0.0359168	-0.0257312	0.366256	-0.1197	0.105368	-0.0635956	0.222385	-0.2126	0.0450372	0.0390728	0.512869	0.208693	0.401496	-0.323336	0.0231374	0.0337	-0.23715	0.00451871	0.0903539	0.23513
ENSMUSG00000003299	Mrpl4	0.388642	0.10681	0.0809022	-0.227659	0.115521	-0.064087	0.0141156	0.2423	-0.0358687	0.0816479	-0.0762981	0.162188	0.123642	-0.177983	0.209151	0.105039	0.393915	0.318719	0.594895	0.0512844	0.440491	0.0897544	0.130768	0.319377	-0.0225674	0.249528
ENSMUSG00000003308	Keap1	0.2995	0.303698	0.238614	0.287067	0.319299	0.255905	0.337612	0.187393	0.267648	0.404114	0.420023	0.282634	0.530491	0.350266	0.203746	-0.0222909	-0.0458418	0.0223806	-0.246047	0.049228	0.0480193	0.0621489	0.134499	0.12404	-0.000316675	0.165728
ENSMUSG00000003352	Cacnb3	-0.0968945	-0.0321155	-0.377264	-0.0439936	-0.0109225	-0.0389746	-0.199264	-0.190052	0.0885546	0.039159	0.0384641	-0.162587	-0.035592	0.09061	-0.0166151	0.386705	0.0578887	0.116176	-0.358818	0.0319275	0.218822	0.163006	0.223558	0.170221	0.21385	-0.0924519
ENSMUSG00000003360	Ddx23	-0.127414	-0.0367124	-0.230667	-0.328793	-0.234465	-0.295224	-0.157155	0.0673893	0.165804	0.254313	0.189707	0.316529	0.25383	0.0792119	0.0546757	0.112674	0.293442	0.00690876	0.422225	0.400607	0.299891	0.349121	0.454392	0.417745	0.418471	0.434285
ENSMUSG00000003378	Grik5	0.0607651	0.643721	-0.153118	0.375914	0.310704	-0.238586	-0.367711	-0.348651	0.535422	0.148991	0.140986	-0.00403197	0.275931	0.499138	0.0536327	0.340178	0.156001	-0.274388	-0.41555	-0.538424	-0.597429	-0.0154483	0.127818	0.0329956	0.167521	0.138916
ENSMUSG00000003379	Cd79a	0.632706	0.60417	0.166101	0.218054	0.545371	0.0100055	0.188342	0.147619	0.0593415	0.197621	-0.0180209	-0.0251663	0.537101	0.211879	0.371381	0.0849861	0.321383	-0.0594216	0.194043	-0.596173	-0.00973858	-0.27834	-0.0217688	0.0475588	-0.260524	-0.0741241
ENSMUSG00000003382	Etv3	0.567024	0.520245	0.2823	0.17989	0.433252	0.0653785	0.24902	0.258263	0.401721	0.302119	0.0578125	0.206687	0.383282	0.307943	0.318514	-0.191022	0.100828	-0.22568	0.0727507	-0.458148	-0.387061	-0.337621	-0.294821	-0.0965111	-0.306735	0.267462
ENSMUSG00000003411	Rab3b	-0.126753	0.100183	0.16888	0.0270545	-0.242209	0.151032	0.105713	0.0837069	0.153143	0.394739	0.415799	0.508889	0.233587	0.336985	0.0432008	-0.453172	-0.46436	-0.423495	-0.349243	0.258488	-0.419301	0.0188534	0.0843946	-0.0996525	-0.240088	0.353238
ENSMUSG00000003418	St8sia6	0.354574	0.428646	0.395116	0.487783	0.552882	-0.112211	0.0860788	-0.0271654	0.565881	0.235015	0.342329	0.156737	0.419548	0.168702	-0.0180637	0.12622	0.263665	0.181732	0.0576208	-0.136166	-0.251011	0.144941	-0.0449424	0.0802005	0.166278	0.433017
ENSMUSG00000003420	Fcgrt	-0.272085	-0.264502	-0.216581	-0.0528904	0.0602181	-0.109718	0.0617236	-0.192105	-0.0697251	0.114157	0.269631	-0.19964	0.183021	0.00565773	-0.0564429	0.15732	0.103055	-0.0904073	-0.128286	0.138459	0.327993	0.225702	0.180759	-0.0339052	0.0686611	-0.331343
ENSMUSG00000003421	Nosip	-0.260939	0.00145114	0.0590636	0.0168316	-0.218803	-0.55194	-0.347149	-0.221538	0.0309325	0.0452216	0.246889	0.258159	-0.316465	-0.085192	-0.113246	-0.0321	0.27102	-0.148851	0.255029	0.11229	-0.178167	0.0568825	0.085239	-0.400747	0.0305282	0.513194
ENSMUSG00000003429	Rps11	-0.399072	-0.468447	-0.0431323	0.0352678	-0.23347	-0.101131	0.00397425	-0.301765	-0.226133	-0.235391	-0.0664392	-0.295277	-0.487948	-0.387108	-0.462177	0.140769	-0.0152126	0.237901	0.0571861	0.478737	0.103921	0.140461	-0.0553259	-0.10112	0.225295	-0.036922
ENSMUSG00000003437	Paf1	-0.515243	0.0699606	-0.530296	0.148886	-0.0927287	-0.259036	-0.186131	-0.319673	0.372825	0.141695	0.274446	0.0388715	0.0999518	0.497855	0.0673806	0.30986	0.0166335	-0.421887	-0.44215	-0.00528426	-0.183893	0.299493	0.422633	0.128864	0.434622	-0.0699059
ENSMUSG00000003438	Timm50	0.00865972	0.534861	-0.225309	0.01044	-0.104456	0.153027	-0.030455	-0.0429336	0.388432	0.113483	0.266989	0.452883	0.181242	0.691701	0.445861	0.00129415	-0.257133	-0.297817	-0.452356	-0.147725	-0.311029	0.0698257	0.442504	-0.0388898	0.0451547	0.118145
ENSMUSG00000003452	Bicd1	-0.0645311	0.180574	-0.549805	-0.123619	-0.109488	0.0504179	-0.202035	0.010813	-0.203285	0.201268	-0.177387	-0.0734855	0.104223	0.29992	0.149676	0.317454	0.0320937	-0.325668	-0.256695	-0.230545	0.187005	-0.0588675	0.323003	0.244925	-0.0433922	-0.327646
ENSMUSG00000003458	Ncstn	-0.602359	-0.239022	-0.237654	-0.0952132	-0.445055	-0.00296652	0.191432	-0.164787	0.0254181	0.0423872	0.310879	0.198252	-0.0140412	0.257705	0.110574	-0.153287	-0.444241	-0.151976	-0.126805	0.654936	0.0886874	0.475869	0.589906	0.0757908	0.391472	-0.108875
ENSMUSG00000003500	Impdh1	-0.247422	0.0589545	-0.428922	-0.24734	-0.318009	0.559437	0.117204	0.154401	-0.110614	-0.0228379	-0.0131903	0.179138	0.179759	0.477383	0.460983	-0.0308966	-0.623334	-0.115029	-0.481788	0.192206	0.249191	0.285745	0.603555	0.308027	0.104206	-0.593355
ENSMUSG00000003534	Ddr1	0.0857968	0.179876	0.000198915	0.213984	0.208939	0.580668	0.0875902	0.0532355	-0.125969	0.137145	0.00676595	-0.0689749	0.130674	0.1363	0.0756807	0.117769	-0.311438	0.0541321	-0.34995	-0.0650512	0.078509	0.189555	0.12617	0.105685	-0.384099	-0.495248
ENSMUSG00000003541	Ier3	0.00464058	0.374827	0.137559	0.574271	0.250464	-0.4775	-0.0153472	-0.360662	0.419113	0.174875	0.313794	0.0393104	-0.151849	0.220266	-0.117763	0.365701	0.347795	0.0658638	0.083015	0.0314739	-0.273783	0.0737439	0.101654	-0.395426	0.308912	0.436705
ENSMUSG00000003545	Fosb	-0.284846	-0.0499747	-0.407457	-0.117993	-0.258821	0.173414	-0.303601	-0.0908821	-0.221751	0.223821	-0.122786	-0.0667197	-0.100105	0.0520515	-0.242883	0.434027	0.0141406	0.0402947	-0.0847886	0.345846	0.266085	0.279962	0.370387	0.397954	0.141545	-0.151444
ENSMUSG00000003546	Klc4	-0.0831425	-0.174248	-0.186203	-0.41762	-0.473241	0.140575	0.0753231	0.201084	-0.676126	-0.0629119	-0.277325	0.0263276	-0.089049	-0.159901	0.282546	-0.0970561	-0.177203	0.156627	0.432585	0.380397	0.573878	0.081631	0.425269	0.214287	-0.0861525	-0.332602
ENSMUSG00000003559	As3mt	0.390656	-0.0172458	0.26157	-0.103114	0.106859	0.303308	0.4821	0.37696	-0.236663	0.260665	0.120294	0.108117	0.362382	-0.0277251	0.313505	-0.178475	0.0235538	0.0566022	0.202264	0.0857976	0.447944	-0.211681	-0.0553022	0.010138	-0.311837	-0.131493
ENSMUSG00000003581	Rnf215	-0.0884933	0.0109748	-0.384319	-0.272153	-0.170037	-0.266525	-0.211642	0.038283	0.0520623	0.250802	0.0145713	0.0839218	0.180204	0.183744	0.0569801	0.290166	0.350788	-0.241065	0.034327	0.0129831	0.211681	-0.109439	0.179534	0.235784	0.291051	0.14818
ENSMUSG00000003585	Sec14l2	-0.138726	0.5277	-0.203923	0.302536	0.120441	0.17723	-0.0286798	-0.263139	0.509756	0.252662	0.304422	0.17461	0.247616	0.663315	0.200335	0.0744419	-0.293509	-0.370149	-0.443201	-0.151607	-0.533901	0.319995	0.388901	0.0108278	-0.0290792	-0.0718217
ENSMUSG00000003617	Cp	-0.0834711	-0.44052	-0.232622	-0.422947	-0.303286	0.285889	-0.0391213	0.397608	-0.423091	0.242973	-0.12717	0.083103	0.0896365	-0.172665	-0.00746207	-0.0604405	-0.0777755	-0.0577051	-0.0393851	0.269795	0.545409	0.0219117	0.0311753	0.471994	-0.187096	-0.144921
ENSMUSG00000003623	Crot	0.398625	0.262661	-0.154526	-0.164028	0.138932	-0.0955262	-0.105854	0.0541187	-0.0527019	-0.163781	-0.458734	-0.335402	0.141086	-0.0302873	0.0956927	0.292226	0.297281	0.163604	0.208946	-0.39813	0.116679	-0.404874	-0.118232	0.111909	0.212079	-0.148845
ENSMUSG00000003644	Rps6ka1	0.637389	0.658051	0.113394	0.0976343	0.396454	0.223223	0.303882	0.344989	0.520197	0.223405	0.0570057	0.299015	0.530814	0.545132	0.502695	-0.0940413	0.0490954	-0.193286	0.0222843	-0.529787	-0.209675	-0.225237	-0.023574	0.0385197	-0.121301	0.134428
ENSMUSG00000003660	Snrnp200	0.227094	0.55932	-0.0492466	0.143059	-0.0540828	0.0809425	0.386568	0.277371	0.200155	0.356635	0.186221	0.428409	0.405454	0.748185	0.724074	-0.320965	-0.438426	-0.444824	-0.244766	-0.150435	-0.276928	-0.235338	0.290342	-0.235479	-0.130356	0.0273637
ENSMUSG00000003662	Ciao1	0.299977	0.597728	-0.00147685	0.264109	0.28711	-0.30848	-0.0974862	-0.0902406	0.188251	0.335495	0.15894	0.0947704	0.428261	0.351654	0.165898	0.241701	0.334333	-0.248941	0.070091	-0.393855	-0.185933	-0.16803	0.150147	-0.079106	-0.0577583	0.165372
ENSMUSG00000003731	Kpna6	-0.329381	0.050701	-0.272626	-0.136465	-0.439061	-0.0629875	-0.143774	-0.0648513	-0.0682863	-0.0381556	0.00937892	0.196385	0.00047893	0.231511	0.180563	0.167781	-0.206463	0.0917913	-0.0662476	0.439058	0.176546	0.243479	0.605242	0.283156	0.560227	0.000165324
ENSMUSG00000003752	Itpkc	-0.105202	-0.129307	0.16369	0.167531	-0.0829217	-0.242194	0.188088	0.118881	0.448934	0.0546102	0.26688	0.242641	0.037295	0.175749	0.109097	-0.280415	-0.210303	-0.143052	-0.101694	0.123924	-0.120247	0.0467937	-0.0254101	-0.14447	0.407828	0.325192
ENSMUSG00000003779	Kif20a	-0.221847	-0.175526	-0.310873	-0.149565	-0.255159	-0.153508	-0.129971	-0.130717	-0.345673	-0.127738	-0.115722	-0.128479	-0.354014	-0.105917	-0.0674045	0.320616	0.185722	0.131524	0.166025	0.196549	0.394891	0.0682186	0.22325	-0.152524	0.0646119	-0.198015
ENSMUSG00000003810	Mast2	0.202547	0.397558	-0.0606275	0.325548	0.22336	0.480794	0.201966	0.310684	0.169181	0.397619	0.0380129	0.20075	0.397964	0.506138	0.278684	0.0702924	-0.287665	-0.145158	-0.308089	-0.130191	-0.0331882	0.157214	0.228145	0.346594	-0.149444	-0.212487
ENSMUSG00000003813	Rad23a	-0.0162735	0.00873046	0.228435	-0.0337526	-0.00604208	-0.0980923	0.186629	0.108784	0.288709	-0.0679409	0.220506	0.249539	0.208451	0.109855	0.147348	-0.188766	0.00880505	0.0695659	0.219324	0.188969	-0.0450149	0.0692856	0.0387541	-0.101137	0.336594	0.207002
ENSMUSG00000003863	Ppfia3	0.0239566	0.269779	0.11658	0.31388	-0.13892	0.0766069	-0.0261512	0.0448998	-0.00870833	0.24106	0.0749737	0.177033	-0.0682102	0.310978	0.0856113	0.0258683	-0.353964	-0.0677786	-0.397294	0.079177	-0.151437	-0.171812	0.102332	-0.224481	0.0304825	0.0587584
ENSMUSG00000003882	Il7r	-0.102964	-0.156916	-0.21935	-0.0735	-0.178103	0.120586	-0.20732	-0.235473	-0.295117	-0.329015	-0.380595	-0.44262	-0.547765	-0.294182	-0.243247	0.456686	-0.0409447	0.588691	-0.0224676	0.282071	0.360803	0.0992085	0.12444	-0.00823019	0.296706	-0.290059
ENSMUSG00000003934	Efnb3	0.187738	0.387473	0.126105	0.16181	0.224985	0.184589	0.101334	0.00302814	0.492398	0.196485	0.448285	0.354908	0.436653	0.375361	0.226548	-0.00480433	0.00606466	-0.0926363	-0.147533	-0.114815	-0.185541	0.214661	0.197744	0.0163577	-0.0818319	0.202025
ENSMUSG00000003949	Hlf	0.347185	0.156233	0.676779	0.506524	0.269692	0.166871	0.628896	0.225894	0.140448	0.301007	0.400491	0.249286	0.265656	0.0714029	0.108581	-0.41045	-0.227106	0.054342	0.12739	0.163244	-0.131822	-0.0581716	-0.170473	-0.376908	-0.275586	0.249758
ENSMUSG00000003955	Fam162a	0.258951	0.414923	0.197118	0.401339	0.188427	0.462555	0.19623	0.0847899	-0.0369362	0.147008	0.0366765	0.0870866	0.0862887	0.323254	0.11326	-0.0207303	-0.327975	-0.214185	-0.481343	-0.333861	-0.253336	-0.262467	-0.0821331	-0.222559	-0.430201	-0.256908
ENSMUSG00000003992	Ssbp2	0.634817	0.425641	0.369743	0.335435	0.204011	0.0216247	0.164805	0.432059	-0.174841	0.37958	-0.213598	0.0971578	0.112003	0.0882554	0.181424	0.0221061	0.0834938	0.0368907	0.11563	-0.259114	0.076641	-0.599629	-0.249043	-0.112343	-0.161724	0.205292
ENSMUSG00000004018	Fancl	0.15429	0.422384	-0.106569	0.094918	-0.0487111	0.0131077	0.0335685	0.194888	0.524567	0.121911	0.0877848	0.468249	0.0571139	0.559153	0.385257	-0.0393343	-0.0800946	-0.283973	-0.156267	-0.252368	-0.236198	-0.020409	0.219323	0.115688	0.204689	0.348418
ENSMUSG00000004031	Brinp2	-0.0491919	-0.034936	-0.203946	-0.0451066	0.0633688	0.41695	0.0714555	-0.0460369	0.157177	-0.223137	-0.0163305	-0.147122	0.0835507	0.0610079	0.10039	0.23894	-0.174226	0.465754	-0.0670672	0.198537	0.342075	0.556481	0.391218	0.362306	0.290139	-0.379738
ENSMUSG00000004032	Gstm5	-0.0422453	0.194482	0.291291	0.598149	0.222271	0.152528	0.417881	-0.0232159	0.0340685	0.462839	0.573903	0.197384	0.397617	0.342982	0.0891525	-0.218889	-0.248293	-0.364024	-0.307673	0.0330225	-0.228954	0.0973419	0.107612	-0.292386	-0.381653	-0.0682493
ENSMUSG00000004040	Stat3	-0.202593	-0.0428687	-0.448629	0.023409	0.00710782	-0.0873615	-0.175392	-0.25485	-0.00316436	-0.445554	-0.382342	-0.480671	-0.173887	0.0296281	-0.0648693	0.47554	0.0599911	0.276896	-0.111391	-0.130233	0.147372	0.145192	0.597913	0.23181	0.547846	-0.481566
ENSMUSG00000004043	Stat5a	0.219997	0.080366	0.194074	0.0484462	-0.0816666	0.188584	0.503221	0.304567	0.281073	0.0113622	0.0649103	0.240873	0.132353	0.285216	0.30419	-0.125396	-0.225878	0.0892816	-0.0293498	0.199536	0.16488	-0.169141	0.0794621	0.0449429	0.475886	0.126561
ENSMUSG00000004044	Cavin1	-0.168662	-0.289475	0.179986	0.266964	0.0816722	0.0422325	0.12811	-0.226535	-0.274693	-0.132738	-0.0103933	-0.358655	-0.220682	-0.349485	-0.470238	0.123941	-0.0445019	0.418102	-0.0102839	0.388152	0.0813252	0.127779	-0.130313	-0.133873	0.0852709	-0.134468
ENSMUSG00000004056	Akt2	0.602757	0.520464	0.45696	0.367682	0.624711	0.212926	0.449894	0.137004	0.396046	0.0627206	0.205086	0.11267	0.347145	0.294179	0.26542	-0.0935862	0.0890526	0.00761548	-0.107395	-0.479389	-0.248272	-0.297723	-0.277356	-0.314066	-0.206598	0.0509757
ENSMUSG00000004070	Hmox2	0.0229061	0.496056	-0.0491121	0.116358	-0.226696	-0.00627155	0.121427	0.0814535	0.157453	0.352667	0.223582	0.433764	0.331103	0.608189	0.400048	-0.137411	-0.264378	-0.439056	-0.129265	0.0173719	-0.250224	-0.102083	0.432199	-0.0346623	0.107595	0.184921
ENSMUSG00000004071	Cdip1	0.219384	0.221934	-0.421431	-0.127849	-0.266902	-0.030402	-0.228637	0.15436	-0.366907	0.12614	-0.526129	-0.153046	-0.328642	0.0865895	0.126532	0.398151	0.111073	0.090435	0.0837024	-0.10284	0.33968	-0.339218	0.168455	0.0695351	0.0680091	-0.0584768
ENSMUSG00000004099	Dnmt1	-0.0979759	-0.02145	-0.119883	0.181673	-0.0129417	-0.479302	-0.450687	-0.314591	-0.11584	-0.0264431	-0.17935	-0.285422	-0.28107	-0.247272	-0.513949	0.630355	0.540728	0.241746	0.09076	0.0440404	0.112044	-0.103297	-0.0233152	0.134786	0.46098	0.257688
ENSMUSG00000004105	Angptl2	-0.0193083	0.352314	0.0237533	0.341704	0.299312	0.0167537	0.215609	-0.21208	0.314574	0.316031	0.465842	0.114128	0.46306	0.403117	0.0717804	0.095461	0.0311744	-0.149157	-0.149186	0.0632921	-0.265592	0.244624	0.25172	-0.0528286	-0.0279105	0.0444058
ENSMUSG00000004110	Cacna1e	-0.114583	-0.297338	-0.0975348	-0.58608	-0.435723	0.177842	0.00853309	0.273574	-0.353539	-0.435866	-0.292229	0.136923	-0.15396	-0.209166	0.275237	-0.184234	-0.256639	0.397295	0.298167	0.400266	0.497909	0.147383	0.280757	0.229491	0.264981	-0.215328
ENSMUSG00000004127	Trmt10a	0.401313	0.492519	0.0926473	0.355127	0.344173	-0.262061	-0.0831772	0.0298503	0.217713	0.655468	0.187068	0.112153	0.41123	0.240903	0.0101694	0.275432	0.454574	-0.242417	0.0713844	-0.292506	-0.115579	-0.201783	-0.0145052	0.162911	-0.126214	0.432815
ENSMUSG00000004207	Psap	0.0739624	0.0353907	-0.221561	0.0542106	0.17138	-0.435035	-0.307171	-0.300404	0.0491433	-0.131465	-0.31564	-0.446348	-0.346894	-0.268462	-0.248666	0.595128	0.645423	0.279354	0.354403	-0.158949	0.114463	-0.0787588	-0.115551	0.0558945	0.300645	0.113946
ENSMUSG00000004221	Ikbkg	0.344711	0.360299	0.174176	0.0292541	0.0530722	-0.170002	0.214326	0.134045	-0.0369965	0.0274464	-0.019366	0.179946	-0.0637345	0.161201	0.520443	-0.221831	-0.0109937	-0.143342	0.1913	-0.276386	-0.0768709	-0.386674	-0.0262989	-0.4701	-0.255898	0.0859759
ENSMUSG00000004266	Ptpn6	0.215539	0.21438	-0.137153	-0.192391	-0.231595	-0.0304041	-0.10225	0.386593	-0.0293825	0.414785	-0.0291765	0.414632	0.0286272	0.316706	0.304808	-0.132693	0.0107263	-0.499915	-0.151129	-0.24736	-0.00138398	-0.457817	-0.0394827	-0.0604075	-0.241296	0.315046
ENSMUSG00000004268	Emg1	-0.0022134	0.0638005	-0.114041	-0.145913	-0.34935	0.0992919	0.155671	0.166101	-0.535088	0.0762698	-0.13741	0.0862453	-0.0345541	0.0949973	0.335829	-0.231414	-0.34399	-0.0228952	0.0800565	0.20521	0.239366	-0.0973048	0.357633	-0.0557634	-0.130373	-0.186959
ENSMUSG00000004270	Lpcat3	0.664228	0.150164	0.349576	0.113545	0.34553	0.0320007	0.14699	0.36952	-0.00763751	0.192931	-0.133279	0.0324873	0.119822	-0.152708	-0.0741232	0.108259	0.420984	0.129723	0.11059	-0.324487	0.150748	-0.582104	-0.526419	0.00388752	-0.175523	0.341883
ENSMUSG00000004347	Pde1c	-0.256446	-0.0337659	-0.310634	-0.00912361	-0.0993022	-0.352047	-0.2999	-0.507027	0.0629738	-0.367538	-0.169212	-0.390149	-0.354959	-0.175031	-0.278076	0.63664	0.325784	0.495169	0.263544	0.272853	0.250636	0.329639	0.376444	0.0992183	0.745619	-0.0461704
ENSMUSG00000004356	Utp20	-0.171613	-0.200636	-0.17184	-0.0742448	-0.43932	0.292334	0.154218	0.374486	-0.243823	0.324473	0.0374253	0.291804	-0.119043	0.206962	0.176217	-0.0379419	-0.395628	-0.191011	-0.315741	0.403854	0.387763	-0.0722324	0.206551	0.0159979	0.0180785	-0.0914245
ENSMUSG00000004360	9330159F19Rik	-0.200304	-0.310496	-0.32866	-0.293266	-0.488127	0.212906	0.136561	0.375883	-0.343338	0.0161204	-0.257799	0.0437478	-0.0189323	0.137647	0.250626	0.0145088	-0.410203	-0.00542625	-0.279873	0.370233	0.537943	-0.139886	0.255005	0.303662	0.431212	-0.342807
ENSMUSG00000004364	Cul3	0.315024	0.626637	0.259121	0.195103	0.251116	0.116369	0.15909	0.232632	0.314963	0.433474	0.365521	0.549019	0.589523	0.584843	0.494261	-0.380133	-0.156098	-0.59261	-0.237853	-0.44719	-0.50171	-0.218755	0.0317583	-0.102426	-0.433449	0.201213
ENSMUSG00000004371	Il11	0.498282	-0.0704622	0.291276	0.105812	0.26363	0.0287106	0.321756	0.300701	-0.247374	0.0325521	-0.359898	-0.322454	0.0070503	-0.338305	-0.050106	0.0803074	0.251292	0.331333	0.336884	-0.0729902	0.300974	-0.481768	-0.469963	0.0135291	-0.0137683	-0.025992
ENSMUSG00000004383	Large1	-0.177254	0.0405885	-0.152055	-0.151474	-0.303239	0.324754	0.499084	0.0904043	0.0119221	0.0007119	0.270518	0.302448	0.132513	0.428399	0.526407	-0.302089	-0.551973	-0.11795	-0.075415	0.38801	0.198152	0.297565	0.589066	-0.124968	0.0640583	-0.289968
ENSMUSG00000004394	Tmed4	0.132534	0.339459	0.317089	0.407453	0.2909	0.287805	0.00686822	0.0802924	0.367044	0.333051	0.287117	0.323541	0.0572678	0.332725	0.0287359	-0.107276	-0.183134	-0.382744	-0.46924	-0.32695	-0.474103	-0.0858047	-0.241533	-0.217056	-0.455117	0.099088
ENSMUSG00000004446	Bid	-0.0897131	-0.0749734	-0.450467	-0.44569	-0.296083	-0.153025	-0.226042	0.0418787	0.180178	-0.108325	-0.17288	0.0601585	-0.0478942	0.11203	0.152917	0.137494	0.057992	-0.0822785	-0.10073	0.00152101	0.210258	-0.0289122	0.244228	0.387165	0.557678	0.14933
ENSMUSG00000004500	Zfp324	0.132603	-0.182481	0.183948	0.23744	0.370629	0.413121	0.531373	0.315871	0.128606	0.172515	0.188605	-0.0534146	0.325775	0.0939842	0.219818	-0.1116	-0.164676	-0.0837007	-0.23508	-0.102002	0.307232	0.0671165	-0.154476	0.0986791	-0.142031	-0.44803
ENSMUSG00000004530	Coro1c	0.145684	0.168448	0.14291	-0.169776	0.104092	0.0123644	0.115837	0.0309436	0.411321	-0.0267397	0.282292	0.33993	0.294881	0.148981	0.162566	-0.0357057	0.158653	0.192866	0.287093	0.160231	0.0614234	0.302313	0.240193	0.193364	0.232029	0.297983
ENSMUSG00000004561	Mettl17	-0.0696608	0.126527	-0.288965	0.118279	0.332597	0.0490807	0.167184	-0.277631	0.209146	-0.108548	0.126187	-0.325486	0.32396	0.228425	0.118861	0.265439	0.13438	0.000917319	-0.0292194	-0.207316	0.0663863	0.328215	0.264173	0.0510545	0.108652	-0.504706
ENSMUSG00000004562	Arhgef40	0.0866542	0.469412	-0.200744	0.0740694	-0.082239	0.270037	0.41014	0.234354	0.255714	0.242727	0.217278	0.412289	0.410039	0.769969	0.740551	-0.118958	-0.469742	-0.141082	-0.257643	0.1313	0.0527613	0.177903	0.656272	0.138524	0.247852	-0.111441
ENSMUSG00000004565	Pnpla6	0.0462233	0.358899	0.0319812	0.473509	0.120908	0.0529866	0.0362947	-0.0360911	0.44287	0.362923	0.279547	0.198717	0.0801028	0.433217	0.0538956	0.140857	-0.125025	-0.167253	-0.19433	-0.0502529	-0.224914	0.208749	0.185651	-0.124346	-0.00715683	0.148146
ENSMUSG00000004568	Arhgef18	0.14759	0.20896	0.0611535	0.0894736	0.119755	0.493117	0.121536	0.346786	0.0477465	0.156792	-0.0919375	0.145258	0.196418	0.27779	0.21087	-0.0955898	-0.272635	-0.169197	-0.223155	-0.200369	-0.0605127	-0.0694891	-0.050584	0.101372	-0.196534	-0.2791
ENSMUSG00000004591	Pkn2	0.159823	0.217122	0.00711868	0.382497	0.303135	-0.0608643	0.330175	0.0938605	0.0625594	0.463556	0.293579	0.00127688	0.332082	0.319517	0.328344	0.126903	0.0945942	-0.269556	-0.112358	-0.156027	0.144717	-0.104669	0.0640784	-0.259154	-0.211879	-0.190098
ENSMUSG00000004612	Nkg7	0.416441	0.428987	0.203263	0.0350962	-0.0505246	0.326237	0.0865441	0.527094	0.112828	0.387815	-0.0159369	0.537238	0.23208	0.428157	0.348915	-0.30043	-0.355598	-0.327073	-0.395341	-0.212823	-0.257804	-0.4862	-0.138881	0.0251426	-0.240317	0.314411
ENSMUSG00000004626	Stxbp2	0.0416643	-0.095337	-0.283519	-0.358397	-0.379859	-0.168921	-0.335392	0.143923	-0.368396	-0.224651	-0.472254	-0.0480044	-0.538897	-0.205849	0.166646	0.187628	0.102967	0.258875	0.169549	0.0167284	0.394685	-0.235163	0.0731102	-0.00570007	0.152992	0.0372775
ENSMUSG00000004633	Chn2	0.296782	0.515396	0.350406	0.509928	0.0880671	0.111334	0.433321	0.265314	0.276177	0.429709	0.362415	0.535541	0.154335	0.568147	0.345839	-0.26202	-0.303219	-0.303863	-0.283336	-0.036699	-0.34126	-0.28313	0.0357535	-0.42173	-0.139017	0.393467
ENSMUSG00000004637	Wwox	-0.152102	-0.0830326	-0.222759	-0.338516	-0.5086	0.0678414	-0.0561529	0.0808216	-0.244803	0.180664	0.0364918	0.289673	-0.199042	0.00765602	0.160871	-0.0247624	-0.150701	0.0776434	0.225092	0.55201	0.37514	0.26217	0.507251	0.160007	0.0300865	0.185251
ENSMUSG00000004661	Arid3b	-0.197312	-0.481161	-0.184143	-0.447025	-0.397293	0.444611	0.0154924	0.248689	-0.482019	0.0111467	-0.223554	-0.0301082	-0.0685812	-0.270913	-0.196146	-0.0591937	-0.173787	0.0595248	0.122862	0.408297	0.490172	0.150874	0.0853415	0.422065	-0.123468	-0.295355
ENSMUSG00000004665	Cnn2	0.335114	0.21462	0.178552	-0.212461	-0.110166	0.19087	0.225721	0.455749	0.260836	0.258881	0.192975	0.601082	0.393878	0.24369	0.391753	-0.363526	-0.150378	-0.0497948	0.259279	0.143527	0.0427012	0.0753044	0.172364	0.195388	-0.10744	0.429311
ENSMUSG00000004677	Myo9b	0.209162	0.205738	0.0231564	-0.103125	-0.0846511	-0.0600511	0.0992826	0.341293	-0.0424023	0.47172	0.213026	0.412558	0.386681	0.206683	0.385913	-0.16177	0.127716	-0.242827	0.398523	0.036364	0.23075	0.0313002	0.268478	0.0606814	-0.253566	0.22256
ENSMUSG00000004698	Hdac9	0.0429491	0.338039	0.0165454	0.262858	0.412387	0.0305701	-0.43575	-0.504051	0.185681	-0.420994	-0.218624	-0.432519	-0.0719113	-0.108474	-0.418151	0.39206	0.254591	0.175587	-0.110061	-0.541451	-0.557005	0.0451598	-0.236399	-0.0382198	-0.0772317	-0.221856
ENSMUSG00000004748	Mtfp1	-0.0546494	0.236052	0.175444	0.412397	0.0857272	0.494086	0.512336	0.196928	0.0894866	0.354866	0.416134	0.345163	0.417363	0.525555	0.383775	-0.383349	-0.661111	-0.375491	-0.452132	0.0865399	-0.214287	0.188567	0.262485	-0.0994155	-0.335202	-0.283374
ENSMUSG00000004768	Rab23	-0.0568243	0.0418664	0.211666	0.180599	-0.173841	0.151009	0.4578	0.373881	0.155894	0.247006	0.308661	0.458476	0.345305	0.460432	0.419522	-0.50686	-0.536698	-0.491448	-0.304784	0.0653399	-0.128277	-0.159102	0.0897157	-0.126488	0.0605345	-0.00656397
ENSMUSG00000004788	Eif2b2	-0.0167713	-0.0825659	-0.169409	0.00711574	0.0962871	-0.363481	-0.385506	-0.42375	-0.197972	-0.0211537	-0.0285906	-0.400369	-0.245711	-0.389509	-0.388555	0.597456	0.642283	0.352899	0.30179	0.0301193	0.347068	0.144749	0.0746266	-0.0108909	0.0453705	0.0572903
ENSMUSG00000004842	Pou1f1	-0.0209515	0.0405328	-0.230384	0.0542794	0.17436	-0.286036	-0.0723743	-0.428696	-0.127685	-0.147919	-0.11342	-0.536246	0.0669107	-0.147494	-0.215298	0.575977	0.479252	0.299387	0.277831	-0.00108177	0.295148	0.0922894	0.208642	0.11568	0.370676	-0.27632
ENSMUSG00000004843	Chmp2b	0.147021	0.45704	-0.148075	0.22217	0.243963	0.564169	0.316344	0.103995	0.256338	0.0748136	0.0411588	0.0382489	0.47884	0.606981	0.443325	0.0697209	-0.371594	-0.19168	-0.363603	-0.302492	-0.103393	0.160307	0.311422	0.202731	-0.0956491	-0.593088
ENSMUSG00000004849	Ap1s1	-0.197954	-0.452473	-0.0276671	-0.352311	-0.476239	-0.185158	-0.172959	0.0675059	-0.520701	-0.233324	-0.316246	-0.112921	-0.529929	-0.470068	-0.041498	-0.220916	-0.115985	0.169497	0.275417	0.283081	0.235934	-0.154168	-0.116921	-0.178025	-0.0496699	0.00989271
ENSMUSG00000004892	Bcan	-0.170088	0.311918	-0.533526	-0.159438	0.0349285	0.0774908	-0.575127	-0.45098	0.106288	-0.25047	-0.242489	-0.281283	0.0432859	0.136055	-0.148458	0.622025	0.179933	0.173382	-0.194985	-0.183742	-0.0831619	0.341452	0.429667	0.52246	0.335403	-0.280455
ENSMUSG00000004896	Rrnad1	-0.106228	-0.0872644	-0.533501	-0.479521	-0.262764	-0.00438204	0.0192969	0.0426037	-0.150052	-0.304175	-0.240805	-0.103917	-0.00646311	0.0725729	0.362269	0.167927	0.0704725	0.0650759	0.268648	0.0185718	0.51491	0.15809	0.46131	0.197896	0.307929	-0.398421
ENSMUSG00000004931	Apba3	-0.316675	0.060333	-0.460704	-0.024534	-0.369581	-0.478305	-0.3133	-0.210928	-0.0711293	0.361117	0.0824151	0.00290117	-0.057613	0.235066	0.0531108	0.299661	0.0665997	-0.248949	-0.14621	0.239594	0.120959	-0.00230756	0.452825	0.0305674	0.415867	0.190349
ENSMUSG00000004933	Matk	-0.00453068	0.320832	-0.124433	0.267777	0.0558039	-0.224828	-0.0296413	-0.139252	0.0688361	0.355121	0.318057	0.123907	0.0529457	0.363123	0.287967	0.17413	-0.0274571	-0.147005	-0.335998	9.95051e-05	-0.0291624	-0.0408291	0.272559	-0.351015	-0.0478284	0.0850749
ENSMUSG00000004934	Pias4	0.185073	0.320058	0.251077	0.193739	0.421675	-0.0688546	-0.051215	-0.35346	0.520155	-0.250688	0.150845	-0.0824228	0.0409151	-0.0345754	-0.0786845	0.0511939	0.235413	0.204751	0.293295	-0.281333	-0.407682	0.289562	-0.0708834	-0.148998	-0.068419	0.133094
ENSMUSG00000004937	Sgta	0.27836	0.575262	-0.177394	0.179189	0.14881	-0.00975318	0.124867	0.209863	0.507969	0.512121	0.333634	0.439651	0.481948	0.765782	0.507805	0.0427778	-0.01281	-0.450897	-0.394501	-0.314785	-0.176957	-0.144417	0.251282	0.0113005	0.0401229	0.280604
ENSMUSG00000004945	Tmem242	-0.200972	-0.162535	0.0912998	0.304219	0.0138307	-0.261661	0.0381395	-0.387767	0.0698593	-0.0441549	0.199458	-0.165183	-0.481679	-0.123015	-0.285691	0.153031	0.056326	0.169162	-0.171084	0.243541	-0.0765472	0.0499165	-0.0776553	-0.380188	0.143715	0.194123
ENSMUSG00000004947	Dtx2	-0.189726	-0.10018	-0.3772	-0.320979	-0.238275	-0.481014	-0.340169	-0.0687306	0.159107	0.0620424	-0.0435744	0.0205161	0.108313	-0.0240044	-0.0280344	0.108347	0.316029	-0.157136	0.300914	0.0524266	0.0892887	0.132772	0.239559	0.344974	0.464325	0.332184
ENSMUSG00000004951	Hspb1	-0.248012	-0.259262	-0.0977435	-0.297957	-0.33139	0.553739	0.0613641	0.145422	-0.246685	0.0552193	0.0343049	0.182319	0.101557	0.0149934	-0.137316	-0.212176	-0.45744	-0.0256117	-0.274648	0.433964	0.119	0.24427	0.197739	0.384236	-0.106497	-0.166695
ENSMUSG00000005043	Sgsh	0.2986	0.0289996	0.0325873	-0.333056	-0.226908	0.142577	0.152853	0.620357	-0.36971	0.348667	-0.113746	0.372087	0.168655	0.112542	0.48176	-0.325864	-0.135167	-0.164571	0.0463135	0.0394917	0.338377	-0.431475	-0.0175099	0.067362	-0.257962	0.10609
ENSMUSG00000005045	Chd5	0.469652	0.336455	0.218843	0.163597	0.234669	0.169128	0.259514	0.0269496	0.0820578	-0.0104807	0.035331	0.00109222	-0.0229848	0.102306	0.142208	0.134975	0.178825	0.249447	0.0796398	-0.175707	0.0519676	-0.242681	-0.101499	-0.281489	-0.155422	0.0749646
ENSMUSG00000005057	Sh2b2	0.240369	0.316504	0.222542	0.419998	0.491406	0.11983	0.560537	0.158625	0.236514	0.400875	0.428345	0.123043	0.644092	0.401658	0.368674	-0.0627299	-0.0027236	-0.185231	-0.0266586	-0.103711	0.0598781	0.0790711	0.138014	-0.103875	-0.107321	-0.190856
ENSMUSG00000005087	Cd44	-0.174835	-0.150842	-0.331366	-0.162921	-0.0893797	-0.246209	-0.282689	-0.197117	-0.167721	-0.250365	-0.274027	-0.258942	-0.280104	-0.210893	-0.220023	0.391055	0.407091	0.0684395	0.164543	-0.0761629	0.202958	-0.0240059	0.0498386	0.196681	0.281189	-0.0705384
ENSMUSG00000005124	Wisp1	0.243291	0.110596	0.0113335	0.0631384	0.297289	0.549355	0.428641	0.21996	0.0246173	-0.0609425	-0.0666127	-0.176402	0.382041	0.220713	0.361623	0.00444983	-0.347527	0.205502	-0.290975	-0.0937807	0.267621	0.0443621	0.0887189	0.158235	0.0316238	-0.63986
ENSMUSG00000005161	Prdx2	-0.0771791	0.341231	0.0674195	0.26137	-0.0756148	0.00473155	0.198301	0.205351	0.459089	0.677818	0.700019	0.77184	0.391127	0.732574	0.379244	-0.252717	-0.271033	-0.629095	-0.482559	0.130096	-0.279404	0.0408907	0.307276	-0.155116	-0.0431338	0.474804
ENSMUSG00000005262	Ufd1	-0.366205	-0.208041	-0.155594	0.0560965	4.20502e-05	-0.220286	-0.416301	-0.380705	-0.0578306	0.0149543	0.0251674	-0.22249	-0.0984182	-0.27425	-0.562063	0.401186	0.34432	0.154159	0.0142232	0.248547	-0.0148743	0.317389	0.0752056	0.382964	0.270512	0.144173
ENSMUSG00000005268	Prlr	0.259752	0.0559404	0.0053727	0.0846793	0.269283	-0.27227	-0.0322276	-0.048928	0.10366	0.217942	0.0438597	-0.174795	0.0449807	-0.106062	-0.0540103	0.506243	0.54487	0.249954	0.144262	0.00400561	0.42832	-0.120977	-0.0275666	0.0828173	0.29906	0.16364
ENSMUSG00000005299	Letm1	0.414631	0.498835	0.177443	0.298078	0.00667608	0.124805	0.312238	0.531812	0.0526778	0.462666	0.031919	0.462952	0.272644	0.54708	0.553811	-0.350418	-0.376873	-0.498754	-0.268247	-0.327961	-0.234677	-0.521118	-0.0522771	-0.241033	-0.310037	0.157943
ENSMUSG00000005338	Cadm3	-0.0846041	0.595177	-0.0727743	0.34944	0.0411902	0.0406957	0.114456	0.000120409	0.577136	0.328991	0.417343	0.52005	0.321501	0.819517	0.466503	-0.00301911	-0.274698	-0.391365	-0.317445	-0.0360198	-0.388749	0.248117	0.506294	-0.0364972	0.197563	0.139294
ENSMUSG00000005410	Mcm5	-0.143957	0.202147	0.27467	0.610926	0.464272	-0.119466	0.0253663	-0.487754	0.499756	-0.110195	0.454709	-0.125067	0.0381326	0.145968	-0.172874	0.125066	0.0396945	-0.102186	-0.331486	-0.276911	-0.498176	0.205871	-0.116481	-0.48112	-0.0170126	-0.0990139
ENSMUSG00000005417	Mprip	-0.15415	0.222419	0.298843	0.327621	0.169166	-0.312421	-0.229753	-0.47619	0.347329	-0.153949	0.363225	0.105012	-0.188938	-0.00197555	-0.180917	-0.130696	0.0259764	-0.01778	-0.0245611	-0.116486	-0.67906	0.216147	-0.0847247	-0.543362	-0.199163	0.333521
ENSMUSG00000005447	Pafah1b3	0.529333	0.379235	0.0540874	0.0860599	0.177303	0.102723	0.150538	0.201533	0.13433	0.255287	-0.190899	0.031086	0.00592217	0.155398	0.143834	-0.000139138	0.0702559	-0.0947249	0.0459048	-0.318603	-0.0973882	-0.371359	-0.16855	0.0232368	-0.183742	0.245755
ENSMUSG00000005470	Asf1b	0.412344	0.512541	-0.0643159	0.3059	0.413764	-0.0155011	-0.0452869	-0.0402237	-0.116824	0.242929	-0.159633	-0.276267	0.427222	0.182584	0.0921245	0.230533	0.260689	-0.207054	-0.098419	-0.652303	-0.184561	-0.351401	-0.0847505	0.127297	-0.303401	-0.1921
ENSMUSG00000005506	Celf1	-0.499013	-0.0290796	-0.370328	-0.19264	-0.42149	0.0540617	-0.122379	-0.0539585	0.229213	0.303577	0.387302	0.45798	0.140282	0.459444	0.120823	-0.0916935	-0.368998	-0.337248	-0.337818	0.469001	-0.0451033	0.492299	0.61414	0.259708	0.24643	0.156917
ENSMUSG00000005514	Por	0.707036	0.320683	0.535977	0.205784	0.539205	0.226953	0.443827	0.269514	0.159995	-0.0859208	-0.0361297	-0.00464581	0.339573	-0.0384399	0.0913868	-0.154086	0.21461	0.213179	0.285797	-0.419675	-0.0985553	-0.349165	-0.443003	-0.160618	-0.267598	0.0704137
ENSMUSG00000005533	Igf1r	0.147024	0.262878	-0.119104	-0.106462	-0.162433	0.22453	0.442796	0.399584	0.196906	0.158161	0.152102	0.486386	0.21722	0.557296	0.761514	-0.249362	-0.42085	-0.0516595	-0.0369609	0.192149	0.266097	0.154005	0.544334	0.0689109	0.198089	-0.00452846
ENSMUSG00000005534	Insr	-0.251501	-0.100241	-0.373676	-0.399317	-0.104378	0.340891	-0.383076	-0.0460536	0.218177	-0.405995	-0.234138	-0.0344855	0.0661775	-0.0259165	-0.0815682	0.125029	-0.143486	0.230709	-0.0177867	0.0324843	-0.00187475	0.593818	0.272944	0.62887	0.253549	-0.262013
ENSMUSG00000005580	Adcy9	0.133217	0.436224	0.0672165	0.111548	-0.0945676	0.604028	0.187457	0.186978	-0.0496073	0.123922	-0.0112097	0.289708	0.288148	0.434094	0.277668	-0.187355	-0.539169	-0.0905703	-0.273241	0.0239717	-0.242182	0.0311577	0.289806	0.202588	-0.202674	-0.179931
ENSMUSG00000005609	Ctr9	-0.0641358	-0.0497396	-0.00887929	0.00961106	-0.248654	-0.297189	-0.0674322	-0.0162283	-0.431111	0.242577	0.00570075	0.00129893	-0.315026	-0.0938898	0.101716	-0.0849826	0.0289456	-0.298476	0.10677	0.00050532	0.113767	-0.330318	-0.0318783	-0.51224	-0.361919	0.010909
ENSMUSG00000005625	Psmd4	0.497622	0.418542	0.20432	0.061847	0.152542	0.37078	0.345351	0.588804	0.16032	0.657165	0.211899	0.525308	0.675074	0.432728	0.447121	-0.364325	-0.166434	-0.365972	0.00884986	-0.140841	-0.0720027	-0.151561	0.0316468	0.225557	-0.439113	0.257237
ENSMUSG00000005667	Mthfd2	-0.115601	-0.0298743	-0.449706	-0.387458	-0.270855	-0.239341	-0.182651	0.0628592	0.0924917	0.163865	0.086775	0.225618	0.116418	0.134064	0.289919	0.243109	0.265296	0.0600935	0.309316	0.274879	0.527633	0.385207	0.615045	0.463559	0.411888	0.200054
ENSMUSG00000005682	Pan2	0.038783	0.00417435	-0.440289	-0.363323	-0.39776	0.226709	0.111663	0.149772	-0.508586	0.117659	-0.275165	-0.083018	0.0931284	0.0893962	0.223955	0.0782795	-0.229613	0.0825874	0.107777	0.301892	0.492175	0.00740091	0.479758	0.284023	0.00240902	-0.301618
ENSMUSG00000005686	Ampd3	-0.223687	-0.149483	-0.344309	-0.377384	-0.554577	-0.249625	-0.158229	0.0892916	0.0203808	-0.27091	-0.186024	0.271133	-0.476485	0.0369899	0.176933	0.0332342	-0.0216452	0.1463	0.235803	0.331283	0.272639	0.13195	0.38596	0.104702	0.555634	0.320179
ENSMUSG00000005732	Ranbp1	0.464832	0.535125	0.178141	0.619386	0.691902	-0.168392	0.174591	-0.096031	0.388057	0.384396	0.190008	-0.188519	0.324978	0.313228	0.120347	0.245283	0.36233	-0.286029	-0.165222	-0.693898	-0.314721	-0.343593	-0.312011	-0.33937	-0.288088	-0.00363177
ENSMUSG00000005802	Slc30a4	-0.287356	-0.0589584	-0.124392	-0.0020268	0.0555757	0.142307	-0.129926	-0.268324	0.215301	-0.107125	0.214511	-0.0580313	0.097821	-0.0329941	-0.0295317	0.213006	-0.0172981	0.353198	0.128818	0.336774	0.146834	0.778927	0.453437	0.300438	0.213735	-0.178286
ENSMUSG00000005803	Sqor	0.14765	0.200095	0.532281	0.542973	0.454837	-0.289246	0.0740302	-0.115322	0.206808	0.478829	0.574395	0.189707	0.232642	0.0300956	-0.156912	-0.0753592	0.301111	-0.236422	0.0190164	-0.15612	-0.250534	-0.0241696	-0.222565	-0.385376	-0.375311	0.367851
ENSMUSG00000005846	Rsl1d1	-0.475793	0.106697	-0.334368	-0.0296905	-0.464759	0.0746725	0.111341	-0.0999337	0.181716	0.153348	0.379034	0.457863	0.0297949	0.592781	0.325161	-0.0963155	-0.49885	-0.281612	-0.374211	0.488604	-0.101692	0.377022	0.698175	0.00374892	0.299822	0.0556925
ENSMUSG00000005871	Apc	0.0213895	0.0896467	0.156068	0.0385331	0.0174479	0.00740373	0.340019	0.0622369	0.468194	0.00103863	0.399495	0.400559	0.132549	0.275267	0.22977	-0.271223	-0.213836	0.0520418	-0.0103764	0.266506	-0.095178	0.264038	0.212788	-0.148185	0.234189	0.338627
ENSMUSG00000005882	Uqcc1	-0.0965173	-0.183882	-0.352003	-0.519908	-0.427264	0.0646873	-0.297592	0.316209	-0.193892	0.121225	-0.159048	0.24188	0.00470468	-0.0606529	0.116877	0.0588294	0.00574428	0.126346	0.194978	0.350287	0.443856	0.196023	0.306373	0.411153	0.134009	0.147659
ENSMUSG00000005886	Ncoa2	0.320485	0.143167	-0.0353228	-0.157178	-0.0899379	0.412924	0.420742	0.633558	0.188181	0.0133617	-0.146742	0.367347	0.110915	0.362927	0.6578	-0.264426	-0.36428	0.00834322	0.00596134	-0.0268931	0.238432	-0.0971871	0.109683	0.0911781	0.0791333	-0.0676382
ENSMUSG00000005893	Nr2c2	0.175452	0.465388	0.0397821	0.141109	0.269292	-0.244877	-0.365755	-0.120781	0.39759	0.172347	0.116956	0.130245	0.371668	0.213677	0.00687063	0.171528	0.245463	-0.085526	-0.125716	-0.317462	-0.418314	-0.0367886	0.00300139	0.17786	0.133343	0.37405
ENSMUSG00000005897	Nr2c1	-0.198748	0.248309	0.115237	0.48519	0.122779	-0.303395	-0.220631	-0.322788	-0.00700941	0.268727	0.295722	0.0553474	0.126425	0.148686	-0.214751	0.146639	0.140406	-0.300174	-0.148605	-0.117475	-0.376771	0.0576628	0.0946785	-0.11448	-0.132117	0.113951
ENSMUSG00000005917	Otx1	-0.0234071	0.271114	0.230228	0.355883	0.16753	0.341869	0.387652	0.032545	0.399031	-0.113955	0.305327	0.305732	0.137617	0.381194	0.310796	-0.0844814	-0.332653	0.209874	-0.0433911	0.196425	-0.131113	0.465014	0.335834	-0.0438891	0.154183	-0.108201
ENSMUSG00000005936	Kctd20	-0.355326	-0.139808	-0.166674	-0.124098	-0.115008	-0.204258	-0.38577	-0.408782	0.267125	-0.126535	0.157872	-0.10073	0.10601	-0.112673	-0.352886	0.209492	0.145426	0.162502	0.00698036	0.263144	-0.146139	0.438087	0.209477	0.3374	0.442793	0.204586
ENSMUSG00000005949	Ctns	-0.16864	0.0695977	0.271383	0.426063	0.104617	-0.165865	0.150489	-0.0851876	0.298558	0.518661	0.622153	0.287885	0.431277	0.276594	-0.134589	-0.0840737	-0.0086065	-0.399881	-0.318615	0.194267	-0.32487	0.000605022	-0.0173436	-0.103752	0.0682815	0.363537
ENSMUSG00000005973	Rcn1	0.263892	-0.232258	0.291209	-0.229583	-0.123082	0.233085	0.490505	0.76143	-0.144679	0.351647	0.0786584	0.435825	0.371621	0.00185543	0.467743	-0.619954	-0.306395	-0.20071	0.118823	0.195695	0.345432	-0.257452	-0.145579	0.163744	-0.186602	0.133306
ENSMUSG00000005981	Trap1	0.36883	0.215257	0.246705	0.0914863	0.140307	0.309464	0.0387124	0.299111	0.0880693	-0.0495233	-0.258046	0.113446	0.0166416	-0.00570585	0.0693586	-0.011156	-0.034544	0.256475	0.152776	-0.150992	0.0411301	-0.0154832	-0.0629494	0.381331	0.0476523	0.0789545
ENSMUSG00000005982	Naa60	0.000294405	0.190129	-0.153165	0.308029	-0.00194298	-0.344047	-0.400941	-0.344462	-0.0945756	0.030097	-0.288839	-0.335352	-0.593571	-0.0772144	-0.40221	0.499804	0.263962	0.0085448	-0.102256	-0.204268	-0.208081	-0.315633	-0.191552	-0.36656	0.0231375	0.131121
ENSMUSG00000005983	1700037C18Rik	-0.156687	0.0945305	0.123661	0.424297	0.137617	0.00604183	0.325247	-0.106914	0.409004	0.073572	0.435363	0.126719	0.274458	0.442642	0.163804	-0.198367	-0.369908	-0.310452	-0.637257	-0.0707428	-0.379451	-0.00531305	0.0277788	-0.202247	0.203089	-0.0328113
ENSMUSG00000006010	Odr4	0.654825	0.816085	0.0243427	0.192258	0.295249	0.171308	0.186686	0.386595	0.204132	0.327748	-0.100308	0.288302	0.509584	0.625301	0.61522	-0.0383448	-0.0176558	-0.323806	-0.0909323	-0.654837	-0.217025	-0.430355	0.0677112	0.0620622	-0.241164	0.0278481
ENSMUSG00000006050	Sra1	-0.128297	-0.279406	0.146047	0.203188	-0.0538707	0.126547	0.481782	0.197904	-0.0341794	0.149309	0.333452	0.126808	0.132329	0.118905	0.120191	-0.315479	-0.399018	-0.010688	-0.305353	0.354086	0.159134	0.0668728	0.0302047	-0.208812	0.0575453	-0.0529295
ENSMUSG00000006095	Tbcb	0.152128	0.279995	0.340884	0.423108	0.172603	0.211242	0.495015	0.127692	-0.092669	0.254367	0.244375	0.123927	0.155901	0.326429	0.329907	-0.305332	-0.361024	-0.236414	-0.147095	-0.083014	-0.12339	-0.175512	0.0138959	-0.509293	-0.364753	-0.264331
ENSMUSG00000006127	Inpp5k	-0.484945	-0.174084	0.0264635	0.286381	-0.0040508	-0.493335	0.0650872	-0.299327	0.239375	0.289294	0.675997	0.210878	-0.0389393	0.153544	0.00414627	-0.0424073	0.107837	-0.35969	-0.0866024	0.26898	-0.0675906	0.316984	0.205129	-0.429478	0.0710884	0.208154
ENSMUSG00000006191	Cdkal1	0.700195	0.400142	0.225327	0.0264443	0.288675	0.186988	0.309316	0.418443	0.10319	0.138524	-0.251688	0.0662416	0.213322	0.192709	0.337958	-0.062419	0.152184	-0.125319	0.109528	-0.545868	0.00126264	-0.627281	-0.34974	-0.00708149	-0.204418	0.0328786
ENSMUSG00000006205	Htra1	-0.107419	0.194936	-0.319939	-0.0348955	0.0486395	0.503104	0.0162625	-0.0435705	0.158026	-0.0791192	-0.0571063	-0.0434902	0.288383	0.339235	0.13483	0.129882	-0.376422	0.152499	-0.338851	0.09084	-0.0733351	0.448821	0.402069	0.461278	0.140469	-0.394075
ENSMUSG00000006262	Mob1b	-0.262956	-0.407273	-0.0744805	-0.050167	-0.0689931	0.163797	-0.157954	-0.0701929	-0.0780187	-0.307837	-0.232526	-0.252745	-0.442832	-0.301925	-0.215174	0.0617062	-0.162211	0.232369	-0.225349	0.0994488	0.0977118	0.162055	-0.156996	0.182175	0.129084	-0.233895
ENSMUSG00000006281	Tep1	0.290015	-0.0158996	0.161689	-0.177167	-0.183589	0.293892	0.222071	0.71482	-0.0462053	0.575313	0.150191	0.629099	0.333242	0.222876	0.271866	-0.413843	-0.192548	-0.470451	-0.151525	0.0110305	0.168935	-0.346458	-0.135783	0.192803	-0.363572	0.341431
ENSMUSG00000006299	Aamp	-0.279709	-0.367604	0.0247792	0.0286328	-0.200178	0.150887	0.335646	0.0344969	-0.0778378	-0.0518588	0.161659	0.0198879	-0.168565	0.0456134	-0.0210706	-0.184036	-0.381242	0.0716977	-0.366158	0.434877	0.0889073	0.012968	-0.0284873	-0.195945	0.156853	-0.10258
ENSMUSG00000006304	Arpc2	0.109911	-0.132477	0.0603433	-0.212888	0.103981	0.140073	-0.0120685	-0.0699662	0.145922	-0.573233	-0.324851	-0.305711	-0.204625	-0.333521	-0.0778069	0.0521721	0.153857	0.472324	0.368001	-0.092846	0.0402968	0.101959	-0.196317	0.107541	0.227998	-0.133633
ENSMUSG00000006307	Kmt2b	0.324455	0.0464611	0.660593	0.400756	0.371973	0.123501	0.229379	0.161486	0.261607	0.339809	0.394253	0.260975	0.215946	-0.0491827	-0.333026	-0.233216	0.15074	-0.206081	-0.153817	-0.180012	-0.349295	-0.302829	-0.614599	-0.235478	-0.429161	0.465134
ENSMUSG00000006369	Fbln1	-0.085289	-0.439784	-0.146026	-0.327975	-0.287516	0.356752	0.137773	0.118535	-0.557153	-0.230399	-0.380621	-0.293916	-0.295296	-0.423898	-0.174274	0.121598	-0.0551091	0.46741	0.368384	0.475852	0.596572	0.143649	0.0700664	0.211231	-0.00385481	-0.38505
ENSMUSG00000006373	Pgrmc1	0.0564382	0.554214	-0.0888284	0.128646	0.0501139	-0.0634223	0.0827707	-0.0349868	0.147911	0.223185	0.227687	0.328151	0.225805	0.58566	0.55467	-0.17531	-0.138094	-0.57129	-0.158496	-0.392933	-0.358368	-0.1046	0.29459	-0.258983	-0.319677	-0.0686175
ENSMUSG00000006386	Tek	-0.180875	0.0983422	-0.212855	0.165981	0.325443	0.00561483	-0.443767	-0.594242	0.0202474	-0.309548	-0.0954321	-0.490497	-0.292852	-0.17571	-0.36644	0.567265	0.271677	0.291232	-0.213565	-0.232161	-0.155156	0.292063	-0.000475419	-0.0534788	-0.0748295	-0.351489
ENSMUSG00000006390	Elovl1	0.0215586	-0.0617696	-0.199572	-0.378529	-0.13438	-0.239859	-0.116989	-0.11762	-0.317724	-0.311724	-0.249034	-0.202734	-0.332065	-0.272454	0.263047	0.134691	0.269783	0.319452	0.568557	0.0357369	0.442562	0.0745227	0.231936	-0.150707	0.0114231	-0.202579
ENSMUSG00000006392	Med8	0.434912	0.182912	0.147891	-0.258009	0.228979	-0.173583	-0.0716238	0.178943	0.14054	-0.0298101	-0.071026	0.145222	0.113078	-0.183757	0.212905	0.0856976	0.519843	0.308977	0.608782	-0.124524	0.234871	-0.0152506	-0.0454349	0.152033	0.0017815	0.345364
ENSMUSG00000006395	Hyi	0.394879	0.404719	0.0682925	0.14044	0.168903	0.0898585	0.163601	0.42006	0.276347	0.568646	0.168428	0.414948	0.503306	0.477985	0.319723	-0.0889315	0.0452622	-0.37455	-0.17327	-0.256557	-0.0652673	-0.266965	0.0161356	0.256097	-0.0545238	0.338291
ENSMUSG00000006412	Pfdn2	0.138373	0.371902	-0.135873	0.285427	0.414902	-0.209158	-0.0348139	-0.435552	0.349213	0.0368719	0.161125	-0.32368	0.327681	0.172187	-0.0620171	0.401074	0.369388	-0.0161582	0.0156348	-0.351867	-0.183422	0.119129	0.12682	-0.0132086	0.102587	-0.080962
ENSMUSG00000006463	Zdhhc24	0.176473	0.0906748	0.306449	0.410661	0.157062	0.0644495	0.134007	0.015131	0.320059	0.222	0.195857	0.137385	-0.2132	0.0159697	-0.203296	0.0144833	0.0269749	-0.0361182	-0.023396	-0.0204401	-0.175564	0.00235519	-0.225345	-0.242437	-0.180085	0.354735
ENSMUSG00000006476	Nsmf	-0.489716	-0.20616	-0.439848	-0.16011	-0.503124	0.195463	-0.0767243	-0.0529315	-0.114594	-0.081012	-0.0130666	0.0537891	-0.162604	0.240542	0.0614974	0.224046	-0.429723	0.0365313	-0.423549	0.485182	0.346905	0.286029	0.554119	0.222892	0.529986	-0.329574
ENSMUSG00000006494	Pdk1	0.569953	0.620138	0.171873	0.316562	0.262877	0.0317093	0.34451	0.292915	0.292505	0.0422721	-0.134102	0.196582	0.0172664	0.426558	0.538323	-0.0695549	-0.0723111	-0.0225264	0.0552421	-0.425325	-0.195946	-0.379543	-0.0557153	-0.317489	-0.0282193	0.133343
ENSMUSG00000006498	Ptbp1	-0.0744708	0.0678242	-0.0363773	0.0878895	0.0690872	0.261268	-0.0401472	-0.224274	-0.125686	-0.214634	-0.0708028	-0.221056	-0.0451512	-0.101712	-0.0599508	0.0165087	-0.10219	0.145461	0.182716	-0.0759111	-0.134574	0.35273	0.110871	-0.0479617	-0.39295	-0.391088
ENSMUSG00000006567	Atp7b	-0.28384	-0.103684	-0.480248	-0.364359	-0.251886	0.184851	-0.00935938	-0.143137	-0.0194523	-0.472607	-0.294723	-0.217735	-0.157004	0.0832829	0.260395	0.148785	-0.181915	0.0979531	0.0873596	0.0423133	0.277353	0.33599	0.462641	0.298507	0.387179	-0.586713
ENSMUSG00000006575	Rundc3a	-0.337201	0.0822204	-0.196736	0.20424	-0.0850615	0.183188	-0.0547361	-0.31539	0.311988	-0.0276642	0.303711	0.0861196	-0.0275496	0.339401	-0.100872	0.226423	-0.28863	-0.0249056	-0.502061	0.197832	-0.127788	0.436991	0.396825	0.0235308	0.238459	-0.12149
ENSMUSG00000006576	Slc4a3	-0.363634	0.0557199	-0.550065	-0.273465	-0.320568	-0.151169	-0.196201	-0.289651	0.0858888	-0.015122	0.134932	0.0700333	0.107136	0.247494	0.106176	0.325441	0.0275453	0.127284	0.0332299	0.439194	0.220981	0.521362	0.764495	0.354104	0.537355	0.028022
ENSMUSG00000006585	Cdt1	0.139058	-0.258504	-0.128186	-0.434394	-0.260566	0.0840861	0.00355656	0.505942	-0.209482	-0.119926	-0.474097	0.00199632	0.0969682	-0.174926	0.186281	-0.126055	-0.103288	0.200417	0.264718	0.107893	0.46997	-0.112224	0.0222031	0.574504	0.375743	-0.0575954
ENSMUSG00000006589	Aprt	-0.0593742	0.0579964	-0.193941	-0.206911	-0.406687	-0.159451	0.0451349	0.236506	0.0811632	0.230764	0.0446218	0.369304	0.0162669	0.247904	0.383747	-0.067155	-0.205402	-0.0274757	0.177324	0.423401	0.281046	0.125354	0.482065	0.117937	0.397826	0.277165
ENSMUSG00000006599	Gtf2h1	0.100048	0.0891382	-0.0277616	0.0831578	-0.146536	-0.00903797	0.301778	0.124022	-0.389421	-0.068353	-0.0599181	0.0214597	-0.16879	0.098395	0.45931	-0.0678276	-0.18355	0.0855911	0.0769507	0.0433564	0.312237	-0.168338	0.230377	-0.376367	-0.140587	-0.268623
ENSMUSG00000006611	Hfe	0.258357	0.176297	0.269883	0.235001	0.401128	-0.392024	-0.0100335	-0.12754	0.221685	0.0101873	0.160515	-0.062859	-0.0568512	-0.0810996	-0.0611712	0.0779557	0.479317	0.0569273	0.180931	-0.313527	-0.226684	-0.253885	-0.396669	-0.543449	-0.155857	0.310447
ENSMUSG00000006638	Abhd1	-0.0298129	-0.261903	-0.178784	-0.163306	-0.103739	0.00219246	0.217098	0.153649	-0.195966	-0.25682	-0.244908	-0.230657	0.0315568	-0.157951	0.151873	0.143377	0.0266282	0.376144	0.344839	0.250244	0.643924	0.172274	0.284756	0.306123	0.534679	-0.332907
ENSMUSG00000006641	Slc5a6	-0.379226	-0.0841767	-0.154594	-0.246107	-0.263691	0.330128	0.0289	-0.0658533	-0.0926086	-0.125549	0.218259	0.214476	0.22628	0.208228	0.14898	-0.133493	-0.410257	-0.0115751	-0.338067	0.374223	-0.0373873	0.307226	0.36411	0.133542	0.0375571	-0.275624
ENSMUSG00000006649	Nphs1	0.559201	0.4222	0.0917547	0.145351	0.454242	0.420166	0.117656	0.326052	0.11622	0.0328406	-0.272414	-0.0480654	0.166429	0.150386	0.335682	0.156034	0.0472747	0.137802	0.0367055	-0.514654	0.121056	-0.110403	-0.109522	0.153684	-0.272862	-0.317345
ENSMUSG00000006651	Aplp1	-0.0954116	0.462658	-0.0767798	0.382555	-0.00671571	0.0972485	-0.00441229	-0.277562	0.36543	0.0729209	0.270754	0.182176	0.063037	0.540124	0.123421	0.0779377	-0.267823	-0.216373	-0.374092	-0.128856	-0.443454	0.213821	0.360293	-0.122188	0.0213085	0.00965494
ENSMUSG00000006673	Qrich1	0.257319	0.3715	-0.1691	0.00217463	-0.121721	0.082792	0.161442	0.39634	0.172643	0.520477	0.186836	0.492967	0.183409	0.604566	0.585099	0.00851451	-0.135358	-0.304942	-0.298241	-0.0344849	0.168591	-0.235503	0.269807	-0.0657923	-0.0253286	0.220935
ENSMUSG00000006675	P4htm	0.0351058	0.349932	-0.231484	-0.0224473	0.120364	0.279905	0.100819	-0.0771079	0.183265	0.000157789	0.0120045	-0.0584678	0.387822	0.416448	0.249194	0.0208465	-0.116969	-0.30852	-0.11532	-0.341728	-0.247073	0.0588924	0.179383	0.021604	-0.166172	-0.42214
ENSMUSG00000006676	Usp19	0.471735	0.224826	0.0881932	-0.134934	0.250057	-0.204277	-0.0211486	0.103419	-0.102783	-0.0145629	-0.198331	-0.156112	0.260026	-0.174422	0.194323	-0.0187686	0.404002	0.0569188	0.399417	-0.429943	0.0418452	-0.36123	-0.208481	0.00529415	-0.180627	0.0943195
ENSMUSG00000006705	Pknox1	-0.135356	-0.0998643	0.280945	0.254227	0.192451	0.19173	0.0243912	-0.269356	0.31568	-0.202484	0.267926	-0.0410787	-0.136281	-0.137134	-0.35011	0.110146	-0.00696482	0.409703	0.0321693	0.252034	-0.11594	0.498341	-0.0322094	-0.103562	0.0469078	0.0183451
ENSMUSG00000006731	B4galnt1	0.32195	0.219134	0.231282	0.0699889	0.253667	0.208757	0.383645	0.437286	0.343512	0.300778	0.158003	0.396985	0.428418	0.310725	0.378833	-0.247206	-0.0298088	-0.152014	0.0479674	-0.0834915	0.00213232	-0.0275077	-0.000401897	0.336405	0.0400016	0.213973
ENSMUSG00000006736	Tspan31	0.0499594	0.136721	0.160695	0.167405	0.140663	0.0771566	0.29724	0.306185	0.305626	0.294806	0.299038	0.389516	0.428351	0.393372	0.214999	-0.333088	-0.121179	-0.481761	-0.21304	-0.156556	-0.31317	-0.145504	-0.138944	-0.0627515	-0.104321	0.167695
ENSMUSG00000006782	Cnp	0.61142	0.186462	0.505424	0.0789942	0.122361	0.42802	0.555781	0.722971	0.0522492	0.128928	-0.0543166	0.418162	0.149963	0.135605	0.518384	-0.542232	-0.394211	0.0469915	0.0246607	-0.117463	0.0825747	-0.377965	-0.26335	-0.125452	-0.276837	0.144427
ENSMUSG00000006800	Sulf2	-0.0152199	0.22332	-0.299154	-0.0859876	-0.235336	0.16981	0.212935	0.113088	0.0570156	-0.0463898	-0.0244823	0.136183	0.103516	0.422542	0.511042	-0.0390627	-0.364623	0.0979132	0.0125427	0.17117	0.226352	0.258239	0.619728	0.0978483	0.324376	-0.206412
ENSMUSG00000006818	Sod2	-0.0263063	-0.455119	0.433514	0.14375	0.0389808	0.0513282	0.201973	0.0731306	-0.0847855	-0.211382	-0.0237409	-0.145786	-0.401332	-0.493293	-0.259562	-0.0244184	-0.00497089	0.532466	0.265651	0.402501	0.329733	0.112837	-0.287441	-0.176411	0.14583	0.00409263
ENSMUSG00000006941	Eif1b	0.121374	0.31748	-0.0546766	0.0590196	-0.109461	0.188806	0.334928	0.450331	0.315289	0.440366	0.307318	0.575955	0.477112	0.778645	0.638372	-0.416023	-0.502742	-0.720222	-0.640992	-0.233585	-0.25057	-0.358945	0.0900277	-0.125268	-0.0978651	0.0739032
ENSMUSG00000006958	Chrd	-0.380861	0.159709	-0.460091	-0.0565796	0.0805585	-0.000601695	-0.431215	-0.373983	0.463652	-0.121348	0.156326	-0.0140795	0.181903	0.260117	0.0526863	0.334397	0.0575617	-0.0255859	-0.165345	-0.0778657	-0.145293	0.725994	0.530533	0.462334	0.317542	-0.171707
ENSMUSG00000007021	Syngr3	-0.254459	0.0376647	-0.404601	-0.355736	-0.523477	-0.0817802	0.0567368	-0.0379413	-0.17011	0.0149583	0.0349246	0.235704	-0.169658	0.21714	0.429888	0.0257644	-0.153026	-0.00192498	0.314748	0.476093	0.379797	0.304358	0.740856	0.0116019	0.226563	-0.0450885
ENSMUSG00000007029	Vars	0.163168	0.0588537	-0.200583	0.0160469	0.103593	-0.197077	-0.150083	-0.192037	0.17344	-0.266778	-0.255978	-0.38832	-0.0529907	-0.103591	-0.126011	0.512838	0.339555	0.415497	0.0954946	-0.119708	0.240189	-0.0243027	0.0640662	0.233447	0.604245	-0.00409863
ENSMUSG00000007036	Abhd16a	-0.156766	-0.59971	0.147305	-0.0174425	-0.0649247	-0.277248	0.0523583	-0.141676	-0.455985	-0.183405	-0.0930481	-0.43131	-0.388477	-0.645509	-0.375098	0.133681	0.233465	0.50105	0.279211	0.434273	0.489368	-0.026128	-0.222435	-0.169214	0.177161	-0.0587386
ENSMUSG00000007041	Clic1	-0.0407185	-0.38706	-0.194852	-0.655277	-0.462559	0.103878	-0.00370409	0.457627	-0.399427	-0.0510759	-0.321817	0.148088	-0.0797603	-0.209105	0.226051	-0.108002	-0.0593742	0.240339	0.289579	0.450421	0.62465	-0.0643627	0.13376	0.396203	0.252288	-0.00193382
ENSMUSG00000007050	Lsm2	0.254421	0.305791	0.240437	0.41167	0.461958	-0.402966	-0.150101	-0.0787673	0.246845	0.328648	0.224486	0.021245	0.232248	0.0343349	-0.216059	0.286454	0.613205	-0.0955673	0.1393	-0.337641	-0.184749	-0.168695	-0.249148	-0.15462	-0.0552706	0.392475
ENSMUSG00000007080	Pole	0.0412503	-0.0420088	0.0329027	-0.0131392	0.0498097	0.483633	0.108521	0.413559	0.0898066	0.437008	0.160039	0.261272	0.537114	0.258708	0.116162	-0.116919	-0.271374	-0.343055	-0.48977	-0.0187837	0.105612	-0.031299	-0.0262634	0.497967	-0.0923903	-0.145035
ENSMUSG00000007476	Lrrc8a	0.0536945	0.159083	0.142162	0.134315	0.0841746	0.08127	0.348501	0.424152	0.646795	0.483395	0.548546	0.696111	0.530119	0.611036	0.390992	-0.474241	-0.264033	-0.65026	-0.342152	-0.0933578	-0.318691	-0.00302613	-0.0114889	-0.0207027	-0.0468775	0.397543
ENSMUSG00000007570	Fance	0.0703639	-0.211358	-0.0963933	-0.233312	-0.165933	0.17706	0.154958	0.172307	-0.213648	-0.156341	-0.151813	-0.0976117	0.0486416	-0.157504	0.0552514	0.0355793	-0.0690437	0.485208	0.227375	0.355121	0.530647	0.187968	0.244194	0.295892	0.309739	-0.108889
ENSMUSG00000007589	Tinf2	0.28579	-0.124192	0.452357	0.0359898	0.0935276	0.649413	0.617409	0.486117	-0.042809	0.137806	0.244865	0.320149	0.331806	0.037278	0.201944	-0.458578	-0.446997	0.147243	-0.184995	0.264261	0.210372	0.00139125	-0.117	0.0710502	-0.279775	-0.0506438
ENSMUSG00000007613	Tgfbr1	-0.27731	-0.199591	-0.521911	-0.379097	-0.00502506	-0.182928	-0.441225	-0.19356	-0.0185818	-0.154028	-0.190866	-0.2808	0.111838	-0.12718	-0.129473	0.377978	0.369443	0.0270688	0.0516187	-0.0819576	0.252349	0.27863	0.213743	0.601144	0.367914	-0.218055
ENSMUSG00000007617	Homer1	0.088915	0.105198	0.144332	-0.308422	0.0143722	0.160815	-0.0471201	0.221735	0.175766	0.120815	0.246848	0.504309	0.295768	0.0584318	0.230117	-0.306654	0.0341022	-0.134603	0.234693	0.0175948	-0.0970554	0.218949	0.0645949	0.131146	-0.371224	0.252344
ENSMUSG00000007646	Rad51c	-0.63324	-0.214555	-0.2336	-0.199478	-0.265326	-0.147388	-0.423986	-0.252256	0.0468312	0.132105	0.418523	0.248673	0.218977	0.0635428	-0.155892	-0.0270511	-0.0772657	-0.213468	-0.212141	0.380748	-0.130625	0.539171	0.371073	0.206978	0.0759385	0.0865967
ENSMUSG00000007655	Cav1	0.458546	0.521361	0.335641	0.424481	0.415396	0.258249	0.404308	-0.0391062	0.317578	-0.199149	-0.0249064	-0.0745298	0.136513	0.276928	0.106014	0.0233098	-0.0640476	0.161745	-0.0661028	-0.363634	-0.369527	-0.240272	-0.178485	-0.300344	-0.00833007	-0.0805123
ENSMUSG00000007682	Dio2	-0.203203	0.324592	-0.00565893	0.382246	0.150893	0.375681	0.288104	-0.0374131	0.266922	0.246273	0.460393	0.280566	0.413559	0.66842	0.295682	-0.106507	-0.469904	-0.432735	-0.587115	-0.0611758	-0.282616	0.270396	0.354702	-0.0893946	-0.132273	-0.383878
ENSMUSG00000007777	0610009B22Rik	0.00717134	-0.290781	0.0305014	-0.16951	-0.221321	0.223184	0.542965	0.494714	-0.348267	0.178279	0.0897521	0.237007	0.215936	0.0479867	0.448099	-0.339884	-0.260529	-0.0842598	0.229908	0.331342	0.626419	0.0569129	0.249874	0.111271	-0.0936934	-0.279249
ENSMUSG00000007850	Hnrnph1	0.411525	0.14276	0.26965	0.0749766	0.184658	-0.0224542	0.173768	0.0788037	-0.0781787	-0.379009	-0.362717	-0.232381	-0.301815	-0.190617	0.101971	-0.183254	0.021935	0.211423	0.277369	-0.404628	-0.198199	-0.438511	-0.468799	-0.531102	-0.272011	-0.0737971
ENSMUSG00000007872	Id3	0.0169807	0.311224	-0.314262	-0.0412826	-0.0525872	0.38695	0.0614097	-0.0300484	-0.15269	0.0628778	-0.109539	-0.0082873	0.227294	0.29578	0.123083	0.10927	-0.214306	-0.0690489	-0.132227	-0.00272823	-0.0449193	0.150261	0.391375	0.277248	-0.135343	-0.294052
ENSMUSG00000007891	Ctsd	-0.0668631	-0.234102	-0.152661	-0.0842891	0.218292	-0.41689	-0.251756	-0.181168	0.0556317	-0.186619	-0.158743	-0.329054	-0.190419	-0.344481	-0.263535	0.421067	0.639166	0.255028	0.291815	-0.0727795	0.271914	0.0688212	-0.132345	0.21541	0.396544	0.0762171
ENSMUSG00000007987	Ift22	0.0584614	0.0703392	-0.26622	-0.110956	0.0400362	-0.134915	-0.222674	-0.0700887	-0.38727	0.0372261	-0.222609	-0.224077	-0.0795748	-0.147639	0.092326	0.454176	0.430174	0.117622	0.218897	-0.108137	0.431998	-0.0690566	0.181861	0.174941	-0.0360643	-0.230395
ENSMUSG00000008035	Mid1ip1	-0.0390523	-0.21139	0.0936013	-0.0520968	-0.202217	-0.318596	-0.0829246	-0.0411037	-0.298046	-0.21556	-0.215057	-0.152413	-0.558961	-0.374066	-0.0942584	0.152085	0.152387	0.45159	0.35168	0.324443	0.365178	-0.114335	-0.019722	-0.307831	0.318804	0.128126
ENSMUSG00000008090	Fgfrl1	0.0621228	0.358583	0.00333932	0.108085	0.0706293	0.0964521	0.200201	0.101899	0.0714452	0.0973992	0.216938	0.271615	0.277298	0.401754	0.624955	-0.307536	-0.254118	-0.258425	-0.0159581	-0.221099	-0.161659	0.124738	0.310489	-0.175803	-0.316837	-0.179395
ENSMUSG00000008136	Fhl2	-0.184955	0.43367	-0.0885618	0.549623	0.199575	-0.125764	-0.238186	-0.386931	0.419932	0.214943	0.24815	-0.00623461	0.0682057	0.456231	-0.0666867	0.284911	-0.131007	-0.224378	-0.61117	-0.180488	-0.542763	0.135037	0.184596	-0.061148	0.197318	0.0610705
ENSMUSG00000008153	Clstn3	0.0368291	0.590233	-0.146879	0.221483	-0.157075	-0.0475804	0.125682	0.123056	0.269241	0.407481	0.333197	0.564351	0.280957	0.799425	0.624816	-0.0212768	-0.280044	-0.378699	-0.330338	0.00371938	-0.171246	-0.0233198	0.556914	-0.0939017	0.122754	0.200854
ENSMUSG00000008167	Fbxw9	-0.142623	-0.155632	0.038227	-0.115246	-0.0251147	-0.211225	0.0743117	-0.0743189	-0.0211875	0.127805	0.230452	0.0274645	0.169756	-0.129553	0.0367609	0.0311844	0.22829	0.145302	0.460625	0.38887	0.342429	0.339319	0.29652	0.151233	0.231852	0.0715413
ENSMUSG00000008301	Phax	0.0416234	0.190312	0.0612078	0.0467989	-0.312114	0.0266855	0.328405	0.397313	0.180636	0.350647	0.199663	0.577258	0.17338	0.497137	0.528376	-0.501569	-0.543192	-0.357818	-0.130411	0.20287	-0.120096	-0.0692224	0.286894	-0.0379939	0.0915027	0.318582
ENSMUSG00000008305	Tle1	-0.0820463	-0.198589	0.155163	0.300094	0.332939	0.312269	0.0268202	-0.294351	-0.120531	-0.101545	0.0646475	-0.42831	-0.200929	-0.280498	-0.404373	0.247082	0.0273256	0.25934	-0.243603	-0.0142691	0.0535653	0.181925	-0.248868	-0.149498	-0.313796	-0.441429
ENSMUSG00000008307	1700109H08Rik	-0.302424	0.0710944	-0.43174	-0.0553894	-0.25894	-0.0268757	-0.255335	-0.111926	0.2672	-0.0722008	-0.172607	-0.0132241	-0.0981461	0.260081	-0.0190251	0.333185	-0.0945723	-0.00504513	-0.0429899	0.150156	0.0501944	0.339619	0.458543	0.417566	0.658878	-0.0653681
ENSMUSG00000008318	Relt	-0.0541372	0.144717	-0.0352269	0.166827	-0.0385903	-0.0657363	0.209517	0.0686308	0.14147	0.523633	0.444207	0.310947	0.221387	0.488417	0.308775	-0.259653	-0.234612	-0.778751	-0.505341	-0.194211	-0.219695	-0.273776	0.00690629	-0.400464	-0.370873	0.0327567
ENSMUSG00000008384	Sertad1	-0.44296	-0.194717	0.0384072	0.188572	-0.055147	-0.334888	-0.276533	-0.592773	0.0170958	-0.0889443	0.308915	-0.1067	-0.328285	-0.278787	-0.564451	0.114589	0.212055	-0.014471	0.0859321	0.219826	-0.290635	0.365151	0.0277533	-0.263771	-0.0974345	0.239388
ENSMUSG00000008393	Carhsp1	0.380201	0.390569	-0.203445	0.0691343	-0.0194587	0.116823	0.236357	0.444314	0.0612165	0.51179	-0.0246563	0.25277	0.357103	0.59572	0.524504	0.0631253	-0.185557	-0.338185	-0.403703	-0.208727	0.187481	-0.443833	0.1569	0.0911797	0.0384093	-0.00105047
ENSMUSG00000008429	Herpud2	-0.278795	-0.238756	0.0382437	0.142934	-0.00686309	0.146529	0.352995	-0.0229776	0.406628	-0.102241	0.274908	0.128462	-0.11858	0.16159	0.103858	-0.106653	-0.338521	0.0903569	-0.224471	0.373452	0.0625516	0.415146	0.177251	0.0484165	0.39506	-0.0499663
ENSMUSG00000008461	Fut1	0.0539217	-0.219769	0.0914906	-0.147379	-0.233808	0.0821745	0.322224	0.476795	-0.259898	0.111668	-0.0242176	0.203255	0.227277	0.0218826	0.275939	-0.511223	-0.366759	-0.246015	-0.111561	0.0941056	0.0729283	-0.363717	-0.171649	-0.100164	-0.119276	0.00775274
ENSMUSG00000008489	Elavl2	-0.148651	0.304936	-0.466975	0.116995	0.0263596	0.34315	-0.0873331	-0.210454	0.161467	0.0817673	-0.0239153	-0.156315	0.142083	0.47032	0.098037	0.38687	-0.21151	-0.0595613	-0.393148	-0.0798273	-0.00974442	0.355339	0.488631	0.277446	0.140997	-0.471923
ENSMUSG00000008604	Ubqln4	0.44756	0.32136	0.0641517	-0.00454796	0.175414	0.0981285	0.136047	0.150579	0.061137	0.0786734	-0.205796	-0.0129779	0.134934	-0.00158878	0.147751	-0.0419709	0.0880446	0.218525	0.454057	-0.104566	0.0172967	0.042606	0.0728555	0.215165	-0.1103	0.159441
ENSMUSG00000008658	Rbfox1	0.198182	0.606706	0.240071	0.21903	-0.0399559	0.213983	0.0882022	0.189858	0.362338	0.273574	0.292309	0.654166	0.227063	0.589142	0.39281	-0.346072	-0.418765	-0.305626	-0.245369	-0.1066	-0.530606	-0.0251042	0.19923	-0.169371	-0.231043	0.359388
ENSMUSG00000008690	Ncaph2	0.218965	-0.0465711	0.270466	-0.0147682	-0.0326714	0.290899	0.462166	0.583063	-0.162793	0.369836	0.151821	0.413216	0.296472	0.195377	0.375972	-0.592545	-0.389929	-0.347844	-0.197989	0.0191371	-0.0552127	-0.365348	-0.279649	-0.180159	-0.555294	0.0455221
ENSMUSG00000008730	Hipk1	-0.315353	-0.410589	-0.498093	-0.563751	-0.540926	-0.0559764	-0.31401	0.24921	-0.201737	0.263048	-0.0653953	0.194386	-0.0129575	-0.0295513	-0.0173271	0.0476915	-0.0113359	-0.190235	-0.0606014	0.370532	0.489646	0.117359	0.283149	0.471071	0.24526	0.135675
ENSMUSG00000008734	Gprc5b	0.358624	0.534446	0.224609	0.445421	0.474115	0.190125	0.292667	-0.19973	0.261098	0.0385734	0.200617	-0.0642587	0.305778	0.271949	0.00237691	0.163001	0.0842306	0.115075	-0.0556321	-0.244751	-0.263999	0.0279192	0.0549912	-0.153692	-0.119116	-0.0421275
ENSMUSG00000008822	Acyp1	-0.0637444	0.283	-0.314669	0.11668	0.0691597	0.0198308	-0.321515	-0.360132	0.098936	-0.181126	-0.304478	-0.388675	-0.0739865	0.0965625	-0.16149	0.564383	0.146234	0.105541	0.0224431	-0.229467	-0.0519282	0.171509	0.24694	0.247275	0.292378	-0.362033
ENSMUSG00000008892	Vdac3	0.183462	0.145499	0.684286	0.509042	0.208659	-0.00171733	0.378947	0.157822	0.209309	0.258188	0.446192	0.37324	0.10453	0.0789849	-0.0102859	-0.287621	-0.100631	0.0862894	0.128711	0.221291	-0.155212	0.0248611	-0.123966	-0.396553	-0.089272	0.393694
ENSMUSG00000008999	Bmp7	0.213246	0.329154	0.00856752	0.0554394	0.156366	0.18393	0.352055	0.244133	0.119839	0.330275	0.219291	0.234003	0.664872	0.457227	0.512717	-0.0889417	-0.192978	-0.196881	-0.116186	-0.035151	0.143937	0.0280085	0.342903	0.232449	0.0362999	-0.195914
ENSMUSG00000009030	Pdcl	-0.163634	0.157555	-0.0931784	0.263862	0.103089	-0.725929	-0.397357	-0.553942	0.256151	-0.101031	0.0499741	-0.272943	-0.235628	-0.087862	-0.301449	0.395064	0.508262	-0.0331679	0.197845	-0.190767	-0.304499	-0.011463	-0.00986445	-0.303747	0.363614	0.305719
ENSMUSG00000009092	Derl3	0.657694	0.382811	0.111751	0.189969	0.291992	-0.0322908	0.0246957	0.390504	-0.0257766	0.48522	-0.17412	0.0430496	0.210828	0.102879	0.0798506	0.16077	0.378146	-0.14541	0.140513	-0.48017	0.116521	-0.527745	-0.289977	0.0313118	-0.295163	0.258285
ENSMUSG00000009207	Lnpk	-0.0230084	0.270111	0.0977162	-0.0376642	-0.0160388	0.523949	0.114419	0.172078	0.415374	0.170422	0.311045	0.500313	0.512306	0.466137	0.14889	-0.351378	-0.437481	-0.321521	-0.244494	0.00776858	-0.393024	0.3189	0.218589	0.282051	-0.156753	0.0391606
ENSMUSG00000009216	Fam163b	-0.0990693	0.18294	0.136394	0.202061	-0.200553	0.193207	0.267653	0.269599	0.159227	0.28445	0.246279	0.432811	0.339787	0.552833	0.292451	-0.371932	-0.58778	-0.445987	-0.528575	0.0949846	-0.305812	-0.193585	0.122766	-0.0411602	0.157104	0.0510526
ENSMUSG00000009291	Pttg1ip	0.524831	0.103782	0.623399	0.0556102	-0.00993328	0.398863	0.61567	0.748717	-0.0356869	0.325179	0.181573	0.601777	0.259923	0.141429	0.47904	-0.646025	-0.414689	-0.030605	0.084878	0.139045	0.115807	-0.345162	-0.223296	-0.233269	-0.411359	0.266744
ENSMUSG00000009292	Trpm2	-0.328014	0.0549851	-0.193441	0.270283	-0.00811889	-0.515642	-0.441256	-0.500025	0.130143	0.128225	0.12681	-0.166213	-0.191833	-0.0674046	-0.44669	0.43019	0.386162	-0.0190063	0.0553429	0.114891	-0.207257	0.239831	0.175984	0.0244374	0.330793	0.352577
ENSMUSG00000009376	Met	-0.1091	-0.00560832	-0.00253267	0.199131	0.420982	-0.203465	-0.243569	-0.146155	0.570942	0.0375216	0.238968	-0.0115174	0.218541	0.0153737	-0.206511	0.195447	0.385063	-0.0653731	-0.00660574	-0.249431	-0.24125	0.366753	-0.140373	0.205771	0.127989	0.166836
ENSMUSG00000009418	Nav1	-0.69012	-0.146606	-0.456648	0.0487634	-0.389351	-0.0344238	-0.0956694	-0.286064	0.0950505	0.131148	0.280532	0.0928534	-0.120316	0.323436	0.0194641	0.130291	-0.356508	-0.190219	-0.247967	0.51019	0.0644913	0.638734	0.675465	0.0787446	0.336572	-0.193346
ENSMUSG00000009470	Tnpo1	-0.392453	-0.181466	-0.623505	-0.169192	-0.386953	-0.398176	-0.204352	0.0128566	0.0599814	0.307701	0.14307	0.167092	-0.0474915	0.280961	0.181756	0.1728	0.0583053	-0.388168	-0.172472	0.175687	0.272677	0.161372	0.429956	0.146795	0.318426	0.146488
ENSMUSG00000009487	Otog	-0.116267	-0.282113	-0.219275	-0.251843	0.108621	0.167867	-0.309263	-0.0977386	0.0469369	-0.209582	-0.23686	-0.352913	0.0253269	-0.277336	-0.400238	0.358079	0.277378	0.1127	-0.0733566	-0.134302	0.177214	0.11136	-0.182601	0.45264	0.196468	-0.272087
ENSMUSG00000009555	Cdk9	-0.335249	-0.202405	-0.685483	-0.468966	-0.241982	0.0220687	-0.532016	-0.137946	-0.003263	-0.22269	-0.324073	-0.215859	0.000973929	-0.103044	-0.116077	0.448183	0.157996	0.215603	0.0840318	0.125818	0.332472	0.526762	0.446352	0.810875	0.450823	-0.222465
ENSMUSG00000009563	Tor2a	0.344873	0.131958	0.229576	-0.159352	-0.153675	0.298858	0.579232	0.621106	-0.10942	0.315656	0.169077	0.566046	0.295641	0.259945	0.587359	-0.389516	-0.22518	-0.0596849	0.300198	0.282229	0.42274	-0.105516	0.24628	-0.0336472	-0.134263	0.126507
ENSMUSG00000009585	Apobec3	0.379026	0.246495	0.166578	0.288193	0.475862	-0.161083	0.00190668	-0.209565	0.160146	-0.159804	-0.201149	-0.377647	-0.199967	-0.150072	-0.182083	0.148207	0.439264	0.0133959	0.1694	-0.640374	-0.339833	-0.350112	-0.505451	-0.304688	-0.261528	0.0520562
ENSMUSG00000009621	Vav2	-0.0685201	-0.0725904	-0.233237	-0.420213	-0.047681	-0.19034	-0.0488594	0.0858881	0.291508	-0.0494548	0.122189	0.220037	0.242419	0.0471391	0.301392	-0.11344	0.190496	-0.0193212	0.414335	0.0688828	0.226665	0.415416	0.350163	0.35413	0.255618	0.159903
ENSMUSG00000009731	Kcnd1	-0.102861	0.250064	0.155118	0.334327	0.220992	-0.149203	0.246082	-0.22668	0.252184	0.219143	0.582294	0.247633	0.28562	0.329033	0.174172	-0.0406056	0.0514006	-0.136692	-0.120126	0.125345	-0.208234	0.222815	0.270913	-0.20516	0.0166431	0.170297
ENSMUSG00000009739	Pou6f1	-0.544198	-0.210525	-0.0673789	-0.216825	-0.421014	0.119445	0.140187	0.0366652	0.183003	-0.0396479	0.415825	0.510523	-0.0108963	0.262713	0.328773	-0.358069	-0.502092	-0.100048	-0.0343292	0.618843	0.0683191	0.602378	0.558671	-0.00626466	0.238236	-0.0135743
ENSMUSG00000009863	Sdhb	-0.0705709	-0.499643	0.351555	-0.0312074	-0.056895	0.0419472	0.35454	0.0589451	-0.153148	-0.355315	0.0415935	-0.116677	-0.274428	-0.459044	-0.0692016	-0.159914	-0.0783265	0.581931	0.340668	0.512349	0.398594	0.172113	-0.128991	-0.219354	0.187543	-0.0704966
ENSMUSG00000009894	Snap47	0.224034	0.154205	-0.171447	-0.385227	-0.240969	0.377192	-0.0247943	0.100606	-0.115002	-0.431442	-0.448882	-0.0288487	-0.282004	-0.0462706	0.224609	0.192497	-0.070489	0.540473	0.377297	0.104998	0.367554	0.137759	0.321147	0.22021	0.176287	-0.208908
ENSMUSG00000009995	Taz	-0.199605	0.240567	-0.174328	0.0993658	-0.108616	-0.161992	-0.0553473	-0.152634	0.222884	0.337951	0.353943	0.29545	0.20915	0.307517	0.0924362	0.103035	0.0988843	-0.204535	0.28573	0.242944	-0.0446871	0.492849	0.559753	0.108202	0.0523943	0.221055
ENSMUSG00000010054	Tusc2	0.200873	0.207107	0.139889	0.11196	0.350819	0.183851	0.376487	0.0474105	0.257329	-0.0529475	0.21777	-0.00611211	0.52965	0.251742	0.307551	-0.0779096	0.0330486	-0.130949	-0.000113198	-0.322039	-0.00254631	0.0153411	0.0372561	-0.0249438	-0.0258186	-0.329836
ENSMUSG00000010057	Nprl2	0.0720885	0.131964	0.312374	0.141641	-0.0141089	-0.153529	0.147301	0.0977418	0.423323	0.280111	0.400162	0.476414	0.0237363	0.225577	0.0116742	-0.262429	-0.041482	-0.130458	0.0608083	0.1927	-0.228164	0.0442538	-0.0078115	-0.247775	0.078878	0.617762
ENSMUSG00000010064	Slc38a3	-0.0135276	0.369003	0.410972	0.520016	0.0582436	-0.111258	0.246856	-0.022653	0.225622	0.424547	0.627157	0.558786	0.123378	0.466372	0.198023	-0.338128	-0.261212	-0.472411	-0.3872	0.0126164	-0.533571	-0.157187	0.0147408	-0.587643	-0.321972	0.40684
ENSMUSG00000010086	Rnf112	-0.329043	-0.0536796	-0.345288	-0.0339014	-0.187404	0.193463	-0.0425017	-0.015726	-0.0775073	0.313738	0.257992	0.175138	0.275411	0.237354	0.0370981	0.164562	-0.0894828	-0.179054	-0.116314	0.312527	0.29004	0.507874	0.582977	0.445607	0.0422939	-0.17395
ENSMUSG00000010095	Slc3a2	0.0365113	-0.313722	-0.123415	-0.408061	-0.0748612	-0.181772	-0.451958	-0.115338	-0.202434	-0.210538	-0.319393	-0.244906	-0.375136	-0.574395	-0.438303	0.39127	0.518278	0.420838	0.309063	0.11202	0.349555	-0.0326669	-0.211562	0.254241	0.104113	0.197641
ENSMUSG00000010142	Tnfrsf13b	-0.0716216	-0.146632	-0.424398	-0.242141	-0.177523	-0.0031635	-0.0525484	0.149628	-0.155577	0.0426545	-0.3688	-0.251365	0.217294	0.0398745	0.0442186	0.29034	0.0148774	0.0350562	-0.0144203	0.113264	0.419985	-0.0484299	0.22282	0.645352	0.561724	-0.28005
ENSMUSG00000010175	Prox1	-0.0241547	-0.0218373	-0.151183	-0.212733	-0.176599	0.0106694	0.0647204	0.298038	-0.0624744	0.252892	0.0517702	0.318912	0.0640484	0.103534	0.347408	0.0692171	0.0315646	0.041918	0.300336	0.349674	0.548719	0.263475	0.458053	0.310155	0.192228	0.048146
ENSMUSG00000010342	Tex14	0.40288	0.0331126	0.124509	0.0753105	0.237067	-0.196616	-0.00952159	0.121477	0.0702879	-0.216898	-0.297747	-0.233369	-0.175818	-0.180658	0.0689238	0.166978	0.349647	0.208737	0.0878557	-0.452299	0.120185	-0.462746	-0.418316	-0.0904032	0.136111	0.0693492
ENSMUSG00000010406	Mrpl52	0.205496	0.226367	0.166076	0.0710304	-0.0766545	0.0129626	0.227772	0.127635	0.290873	0.0356388	0.216965	0.386081	-0.00900353	0.272939	0.231905	-0.208567	-0.194126	0.0278807	-0.107322	0.0959593	-0.206818	-0.121825	0.0100273	-0.327457	0.0028252	0.415701
ENSMUSG00000010453	Kansl3	-0.269516	-0.119545	-0.33867	-0.291943	-0.204722	-0.20075	-0.286371	-0.0358852	0.131742	-0.0421635	-0.0537189	0.0894035	0.153494	-0.0215327	-0.019886	0.169612	0.187401	0.108267	0.291871	0.271338	0.195582	0.465009	0.439464	0.699371	0.55051	0.181207
ENSMUSG00000010517	Faf1	-0.0357162	0.205687	0.227209	0.35426	0.164826	0.0413814	0.139065	-0.0516249	0.255115	-0.0640996	0.213532	0.156944	0.162046	0.243774	-0.0341753	-0.125222	-0.100268	-0.0537545	-0.183458	-0.0811668	-0.453697	0.0255749	-0.0715539	-0.163253	0.0565034	0.12176
ENSMUSG00000010554	Mettl16	0.152036	0.237258	-0.292391	-0.0584637	0.116296	-0.163938	-0.076088	-0.210762	-0.205592	-0.0549001	-0.133206	-0.265155	-0.136702	0.0236865	0.19452	0.302643	0.243263	0.152226	0.069666	-0.181968	0.203541	-0.0842802	0.2039	-0.187089	-0.0651269	-0.173714
ENSMUSG00000010608	Rbm25	0.26816	0.264089	-0.120508	-0.224201	0.189171	0.285083	0.0738322	0.302039	0.206774	0.00995949	-0.122504	0.111533	0.594791	0.322196	0.374754	-0.145325	-0.0702118	-0.197464	-0.187921	-0.402543	-0.143847	-0.159142	-0.0289373	0.451324	0.0137095	-0.151957
ENSMUSG00000010663	Fads1	0.247439	0.321543	-0.0986877	-0.289156	-0.189948	0.142742	0.281849	0.397629	-0.0993222	0.0804133	-0.00475409	0.418391	0.362796	0.382917	0.679592	-0.364274	-0.186145	-0.266234	0.210596	-0.120465	0.0279487	-0.182918	0.264765	-0.0643851	-0.257793	-0.0264962
ENSMUSG00000010721	Lmbr1	0.33736	0.137807	-0.0250315	-0.204604	-0.179326	0.122316	0.34463	0.625384	-0.249698	0.463215	-0.0535015	0.424529	0.204818	0.229371	0.610371	-0.289906	-0.163291	-0.154358	0.278723	0.155108	0.413092	-0.187125	0.217692	0.10921	-0.256323	0.110213
ENSMUSG00000010755	Cars	0.251878	0.336037	-0.24436	0.0719428	0.264064	-0.163526	-0.0895139	-0.0930653	-0.0672434	0.177381	-0.0483639	-0.202849	0.218898	0.131267	0.188511	0.470605	0.522348	-0.108571	0.159019	-0.427892	0.251322	-0.146263	0.148218	0.0397714	-0.0989715	-0.208922
ENSMUSG00000010803	Gabra1	0.072652	0.341391	-0.31257	0.117881	0.00342616	0.246862	0.0174099	0.0957054	-0.315828	0.327953	-0.0692997	-0.011566	0.270272	0.370723	0.244558	0.263782	-0.078595	-0.240498	-0.281268	-0.159322	0.199844	-0.098203	0.367099	0.190404	-0.156762	-0.390976
ENSMUSG00000010911	Apip	0.171832	-0.122367	0.312282	-0.0271897	0.111899	-0.0146784	0.323517	0.268969	0.0602074	-0.158435	-0.0100887	0.0926412	0.226684	-0.08867	0.143583	-0.245623	0.0602615	0.197981	0.232157	0.0515337	0.0970045	-0.112888	-0.168692	0.183824	0.261287	0.112988
ENSMUSG00000010936	Vac14	0.262594	0.353455	0.350749	0.030485	0.122445	-0.0693551	0.239927	0.0512989	0.096435	0.0186066	0.204735	0.34559	0.0727949	0.11023	0.363146	-0.263822	0.072595	0.00769852	0.430078	-0.035334	-0.0936834	0.013237	0.1404	-0.253671	-0.199213	0.232869
ENSMUSG00000011096	Akt1s1	0.32771	0.106618	0.24079	-0.27033	-0.157853	0.16726	0.233408	0.514388	-0.224281	0.243484	0.0497761	0.457637	0.285706	0.0852975	0.487027	-0.506064	-0.150309	-0.200677	0.142658	-0.0234034	0.112223	-0.34565	-0.0296252	0.0262265	-0.345006	0.21091
ENSMUSG00000011114	Tbrg1	0.07181	0.158986	-0.185143	-0.175957	-0.31158	0.229014	0.320579	0.33639	-0.0135711	0.0924203	-0.0406364	0.335127	0.239513	0.355573	0.480899	-0.140108	-0.384087	0.161669	0.124702	0.426256	0.319386	0.228151	0.616183	0.405527	0.395318	0.0471708
ENSMUSG00000011148	Adssl1	0.307668	0.355815	0.181065	0.142065	0.0374035	0.148833	0.425696	0.461911	0.415567	0.431001	0.216	0.51561	0.538368	0.550766	0.441972	-0.250785	-0.224846	-0.23424	-0.00697882	0.0596352	-0.0350173	-0.0608066	0.208021	0.274671	0.254757	0.310619
ENSMUSG00000011154	Cfap161	0.0733915	-0.263242	-0.0300667	-0.222118	0.217686	-0.233763	-0.137548	-0.17893	-0.188001	-0.470545	-0.298271	-0.468896	-0.173106	-0.591547	-0.150274	0.172216	0.498847	0.512332	0.568047	-0.0972299	0.247044	0.114486	-0.195251	0.0996221	0.0305647	-0.127707
ENSMUSG00000011158	Brf1	0.112985	0.436566	-0.0445837	0.0462976	0.115374	-0.0965221	-0.108721	0.143707	0.600729	0.464992	0.445034	0.580326	0.453383	0.561595	0.28708	0.00252932	0.130833	-0.377473	-0.168604	-0.138516	-0.257923	0.0983618	0.207114	0.0930877	0.0431452	0.497714
ENSMUSG00000011257	Pabpc4	0.445525	0.059697	0.744724	0.429133	0.260496	0.32356	0.603612	0.40737	0.0262491	0.217276	0.166582	0.207613	0.131826	-0.0175208	-0.0358465	-0.428627	-0.184164	-0.0530812	0.0479359	-0.0598581	-0.120348	-0.387009	-0.50451	-0.370881	-0.368979	0.160399
ENSMUSG00000011658	Fuz	0.168805	-0.0924449	0.0208736	-0.343632	-0.265067	0.186362	0.0649614	0.218052	-0.491614	-0.284381	-0.510247	-0.100903	-0.311414	-0.304216	-0.0375121	0.00862031	0.0237892	0.433961	0.545554	0.244957	0.359267	-0.156037	-0.00374403	0.063371	0.035098	-0.110332
ENSMUSG00000011831	Evi5	0.374985	0.712382	0.312315	0.377962	0.438061	-0.0151624	0.154262	-0.0738872	0.582462	0.0808899	0.307993	0.333252	0.288537	0.410379	0.304144	-0.00705669	0.11101	0.0876427	0.167459	-0.234165	-0.441256	0.177503	0.16373	-0.156124	-0.0452776	0.344281
ENSMUSG00000011877	Git1	0.259906	0.335344	0.0736458	-0.104145	-0.0821852	0.220253	0.125106	0.43113	0.278754	0.196598	0.186964	0.613346	0.474053	0.393353	0.472698	-0.237557	-0.210641	0.00435313	0.022428	0.0908675	0.0323331	0.146291	0.355671	0.347161	0.123618	0.346092
ENSMUSG00000011884	Gltp	0.459428	-0.0972867	0.365848	0.0334985	0.400748	0.129914	0.325681	0.230681	-0.0367805	-0.271112	-0.255979	-0.238673	-0.0104948	-0.440356	0.000501088	0.00940354	0.25333	0.658123	0.599888	0.00248571	0.397707	0.0610013	-0.235592	0.164825	0.0761552	-0.0531048
ENSMUSG00000011960	Ccnt1	0.426899	0.374807	0.00815447	-0.107053	-0.0749926	0.175025	0.0502942	0.197584	-0.0391084	-0.180672	-0.306011	0.113515	-0.206685	0.101881	0.37171	0.121274	-0.00654066	0.4601	0.303144	-0.0231642	0.193443	-0.0951078	0.180937	-0.0402037	0.0395554	0.0661441
ENSMUSG00000012114	Med15	0.278324	0.284788	0.55269	0.345679	0.164947	-0.0386764	0.170883	0.131726	0.18873	0.513779	0.495409	0.486396	0.296106	0.152168	-0.0687685	-0.304329	0.0664729	-0.221411	0.0768952	0.0258428	-0.345544	-0.107283	-0.167312	-0.243091	-0.427072	0.618846
ENSMUSG00000012117	Dhdds	-0.165094	-0.123551	-0.136126	-0.221052	-0.286245	0.603352	0.117023	0.146715	-0.269911	0.0503505	-0.0429843	0.101256	-0.0534021	0.100756	0.0862377	-0.180709	-0.469111	-0.138077	-0.235102	0.212454	0.0708963	0.0988479	0.11715	0.0414864	-0.389904	-0.394428
ENSMUSG00000012535	Tnpo3	0.666327	0.532892	0.535967	0.602454	0.537428	0.307695	0.528651	0.286501	0.308302	0.25463	0.0778223	0.10645	0.223063	0.336098	0.150336	-0.162343	-0.0852917	-0.126353	-0.183189	-0.491303	-0.381765	-0.497431	-0.459813	-0.394731	-0.362745	0.1043
ENSMUSG00000012609	Ttll5	0.572638	0.693865	0.0509981	0.217019	0.194017	0.0360661	0.21706	0.24522	0.335765	0.297978	0.0383071	0.333468	0.177314	0.5277	0.459156	0.0284124	0.108454	-0.269027	-0.0285513	-0.467251	-0.188441	-0.403467	0.040815	-0.172833	-0.122467	0.324685
ENSMUSG00000012640	Zfp715	0.0846316	-0.0678555	-0.0161336	-0.0744913	0.0744479	0.16025	0.321558	0.00445233	-0.19308	0.00668858	0.0372915	-0.16905	0.215642	-0.0913012	0.0982577	-0.0518215	0.0370287	0.167794	0.317795	0.150242	0.339256	0.198326	0.219696	0.137693	-0.0402294	-0.244642
ENSMUSG00000012848	Rps5	0.209866	-0.240718	-0.0394244	-0.179482	-0.0623546	0.156618	-0.058899	0.276757	-0.376589	-0.123018	-0.444058	-0.188354	-0.203371	-0.341563	-0.221306	0.269345	0.192247	0.435722	0.134009	0.0972328	0.528123	-0.196456	-0.166718	0.355357	0.160953	-0.0591337
ENSMUSG00000013033	Adgrl1	-0.499427	-0.0786996	-0.0419814	-0.0370328	-0.212656	0.0657903	0.00066686	-0.0300401	0.361654	0.193513	0.645315	0.53472	0.302801	0.406519	0.256405	-0.326172	-0.435879	-0.305288	-0.406293	0.374816	-0.167586	0.542825	0.45145	0.0256722	0.129817	0.101504
ENSMUSG00000013089	Etv5	-0.368442	-0.146698	-0.514592	-0.45882	-0.373048	-0.406301	-0.532497	-0.269166	-0.0942597	-0.0505872	-0.0840128	-0.0153002	-0.231271	-0.0368792	-0.167745	0.236763	0.322919	-0.284339	-0.00791503	-0.0202146	-0.0080698	-0.0489268	0.132075	0.0568257	0.131949	0.150941
ENSMUSG00000013150	Gfod2	-0.125156	0.127096	-0.267372	-0.199016	-0.06305	0.237575	-0.214601	-0.112889	-0.0825246	0.272645	0.132635	0.086675	0.248153	0.0967698	-0.00962806	0.22169	0.0714232	-0.0524672	0.0506197	0.182543	0.187197	0.422892	0.46859	0.428358	-0.133073	-0.114218
ENSMUSG00000013419	Zfp651	0.417054	0.291895	-0.173236	-0.199545	0.020234	0.142402	0.194445	0.432704	0.128665	0.294441	-0.0154938	0.26517	0.350226	0.42847	0.546971	-0.0785584	-0.0238379	-0.329327	-0.136653	-0.359749	0.191626	-0.350834	0.055017	0.0394647	-0.150849	-0.0145846
ENSMUSG00000013495	Tmem175	0.0369604	-0.241116	-0.0157052	-0.190884	-0.0598723	0.418423	-0.154536	0.0871016	-0.260886	-0.371247	-0.432217	-0.20576	-0.236207	-0.396361	-0.348648	0.0612558	-0.0163458	0.279306	0.121104	-0.0688177	0.10518	0.0817286	-0.213829	0.35704	-0.193778	-0.2393
ENSMUSG00000013523	Bcas1	0.092262	0.115784	0.143837	0.347132	0.207873	0.236109	0.44765	0.11944	0.133505	0.0304687	0.0932072	-0.00519307	0.0690503	0.237532	0.348602	0.0210473	-0.175073	0.0852487	0.0196163	-0.00527619	0.230354	0.180428	0.203702	0.00937303	0.111346	-0.36432
ENSMUSG00000013646	Sh3bp5l	0.090751	0.287851	-0.168882	0.256879	-0.0461203	0.304789	0.101828	0.218774	-0.0172262	0.481335	-0.0260933	0.109858	0.138757	0.433368	0.255291	0.158329	-0.327311	-0.167289	-0.426311	0.0604976	0.064216	-0.0719581	0.239331	0.199152	-0.00973544	-0.124394
ENSMUSG00000013698	Pea15a	-0.00295036	0.0889224	0.0846178	0.550231	0.574826	-0.175185	0.0653676	-0.441738	0.332228	-0.101446	0.186608	-0.468273	0.17047	-0.00712014	-0.34838	0.283122	0.276159	0.0134273	-0.178702	-0.387263	-0.302064	0.110326	-0.220208	-0.17682	0.0588161	-0.194332
ENSMUSG00000013701	Timm23	0.238109	-0.18293	0.354795	-0.0972133	-0.00582419	-0.00786399	-0.149663	0.127756	-0.358353	-0.149126	-0.30241	-0.142448	-0.217728	-0.461111	-0.268706	-0.0889045	0.11693	0.150777	0.0068377	-0.160026	0.000556822	-0.552885	-0.580373	-0.0694789	-0.205482	0.0995597
ENSMUSG00000013736	Trnt1	0.135604	0.159327	0.310907	0.158279	0.180238	-0.206137	-0.0548413	-0.14848	0.282568	0.0404921	0.247503	0.142233	0.090327	-0.151345	-0.154035	0.0871443	0.326173	0.33717	0.486369	0.201028	-0.0721376	0.315337	0.0841631	0.0243731	0.110762	0.482565
ENSMUSG00000013787	Ehmt2	0.243551	0.518715	0.341231	0.20511	-0.0244671	0.387391	0.226622	0.327176	0.0844108	0.332106	0.233768	0.5961	0.351531	0.496883	0.391876	-0.482331	-0.518615	-0.346253	-0.301473	-0.0872801	-0.476419	-0.1882	0.0678519	-0.142197	-0.420391	0.195012
ENSMUSG00000013878	Rnf170	0.513899	0.420723	0.210553	0.153394	0.278988	-0.136972	-0.0762647	0.196462	-0.0540228	0.495879	0.0708205	0.148449	0.421027	0.0854175	0.120811	0.0672569	0.361244	-0.148559	0.0492498	-0.344334	-0.0853361	-0.433113	-0.194619	0.060368	-0.354457	0.362186
ENSMUSG00000013973	Dedd	-0.40224	-0.199595	-0.201529	-0.147177	-0.241175	0.160391	-0.292611	-0.0192374	0.272758	0.131986	0.284461	0.326364	0.0631657	0.0991479	-0.137348	-0.0755008	-0.206505	-0.168625	-0.224099	0.26337	-0.0504134	0.588209	0.303709	0.389482	0.0598145	0.170866
ENSMUSG00000014039	Prdm15	0.0558096	0.313621	-0.226822	-0.17287	-0.0962663	-0.00255442	0.139809	0.160571	0.164421	-0.0330324	0.106758	0.292827	0.333367	0.486242	0.723054	-0.149612	-0.18246	-0.248898	-0.122187	-0.196243	0.0173051	-0.0457154	0.390326	-0.0170818	0.132987	-0.136339
ENSMUSG00000014074	Rnf168	-0.221395	0.313649	-0.304883	-0.20848	-0.301596	0.039933	-0.10039	0.0179101	0.269723	0.0957014	0.175382	0.505676	0.141627	0.493565	0.438039	-0.0336295	-0.215728	-0.117465	0.0773385	0.274379	-0.03371	0.487237	0.742358	0.321813	0.291684	0.150684
ENSMUSG00000014232	Cluap1	0.300827	0.477803	0.258755	0.414939	0.420824	0.145357	0.237054	0.0413935	0.658783	0.212413	0.264895	0.229292	0.178828	0.464064	0.179635	-0.147033	-0.0492601	-0.361378	-0.246789	-0.483978	-0.550203	-0.116639	-0.21086	-0.2363	-0.191103	0.196256
ENSMUSG00000014243	Zswim7	0.376252	0.223487	0.304742	0.265276	0.353344	0.203975	0.0550841	-0.00628164	-0.0288579	-0.0205147	-0.109683	-0.207769	0.0449473	-0.0769138	-0.175046	0.0928335	0.101366	0.234232	-0.171328	-0.269285	-0.189483	-0.33741	-0.386665	-0.104071	-0.155492	0.011083
ENSMUSG00000014329	Bicc1	-0.125868	0.294264	-0.0361228	0.475863	0.1236	0.046138	0.278996	0.104275	0.431193	0.664582	0.544198	0.359537	0.526147	0.76535	0.249932	-0.0842802	-0.310843	-0.714129	-0.668016	-0.0719837	-0.318254	-0.0270571	0.172856	-0.0825371	0.0180301	0.0243665
ENSMUSG00000014353	Tmem87b	0.512319	0.282193	0.362208	0.317773	0.419713	0.0285708	0.238515	0.328735	0.0728407	0.551105	0.2242	0.179925	0.501402	0.110859	0.153	-0.225847	0.164397	-0.389311	0.0149786	-0.448453	-0.177099	-0.371976	-0.387808	-0.141739	-0.661011	0.202264
ENSMUSG00000014402	Tsg101	0.282052	0.0427411	-0.0832343	-0.0541953	-0.0227283	-0.218727	-0.0108667	0.150708	-0.0669976	-0.197404	-0.473381	-0.174506	-0.30349	-0.163362	0.0984591	0.0959975	0.226245	0.295241	0.432356	-0.149066	0.185968	-0.181328	-0.0622506	0.156289	0.264225	0.16484
ENSMUSG00000014418	Hps5	0.232592	0.291743	0.191317	-0.184402	0.00804475	0.240842	0.127047	0.302341	0.417126	0.181035	0.27589	0.601096	0.507757	0.345945	0.278695	-0.31211	-0.173309	-0.0732605	-0.00159187	0.0875864	-0.180262	0.137857	0.166982	0.296869	0.0228299	0.40062
ENSMUSG00000014444	Piezo1	0.185874	0.178941	-0.280411	0.115275	-0.131604	-0.291364	-0.155739	0.0212832	-0.150552	0.20853	-0.31115	-0.116263	-0.361065	0.0348584	-0.044299	0.461143	0.34691	0.0333548	0.15185	-0.0700019	0.274438	-0.287951	0.114411	0.0712515	0.243997	0.253523
ENSMUSG00000014470	Rnf166	0.667134	0.133427	0.285511	0.240199	0.531714	-0.0908551	0.169344	0.266805	0.244437	0.150699	-0.126747	-0.131481	-0.00834898	-0.150971	0.0205717	0.213302	0.522807	0.221799	0.194836	-0.43879	0.210056	-0.381036	-0.500279	0.00347109	-0.0591627	0.276619
ENSMUSG00000014554	Dguok	0.326449	0.12253	0.171173	0.0242621	0.134026	0.725126	0.4158	0.337031	0.156441	-0.148372	-0.0457151	0.11346	0.135938	0.18086	0.255503	-0.123475	-0.35308	0.276764	-0.0953612	-0.030301	0.149465	0.108088	0.00311433	0.065823	-0.134762	-0.307917
ENSMUSG00000014592	Camta1	0.69014	0.700774	0.18916	0.160879	0.333962	0.381042	0.388441	0.436038	0.0105401	0.171007	-0.134823	0.220347	0.451947	0.443979	0.677088	-0.14211	-0.074999	-0.126809	0.075599	-0.551427	-0.0631364	-0.382611	0.0258833	0.00835596	-0.39308	-0.185448
ENSMUSG00000014601	Strip1	0.0680577	0.0343211	0.54747	0.401037	0.434197	0.258543	0.493606	0.192207	0.556558	0.364258	0.774991	0.441386	0.588298	0.317247	0.167681	-0.501107	-0.221619	-0.362913	-0.300813	-0.0804549	-0.309285	0.2095	-0.194318	-0.21465	-0.360788	0.112227
ENSMUSG00000014602	Kif1a	0.120725	0.584945	0.179487	0.379747	0.120969	-0.0778312	0.344834	0.0276326	0.288938	0.469217	0.506161	0.475473	0.331755	0.637111	0.491153	-0.235734	-0.192614	-0.457828	-0.0436875	-0.0618494	-0.309034	0.0116625	0.346885	-0.426499	-0.210707	0.176327
ENSMUSG00000014606	Slc25a11	-0.417969	-0.341019	-0.571828	-0.419583	-0.690904	0.120642	-0.0827782	0.169095	-0.57638	0.0345721	-0.31423	-0.00109282	-0.199366	0.0801953	0.101012	0.0363982	-0.357606	-0.183331	-0.189909	0.396538	0.401942	-0.0554213	0.359023	0.263705	0.146115	-0.349902
ENSMUSG00000014633	Cmc2	0.103472	-0.0178976	0.390396	0.309101	0.305091	0.184232	0.072785	-0.0709694	0.323997	-0.0477648	0.256436	0.0541345	-0.181359	-0.0647515	-0.213311	0.0847842	0.013725	0.296354	-0.254229	0.0397508	-0.0853044	0.0930777	-0.274879	-0.233573	-0.0330078	0.14257
ENSMUSG00000014668	Chfr	0.126653	0.352775	-0.0760546	-0.049889	-0.0615617	-0.0983268	0.186924	0.147981	0.317819	0.288213	0.25669	0.394643	0.507502	0.492461	0.31427	-0.0677028	0.0416777	-0.33318	0.0878312	-0.00823065	-0.0485868	-0.029738	0.343008	0.128604	0.259109	0.270416
ENSMUSG00000014763	Fam120b	0.110295	0.281937	0.191069	0.363929	0.553522	0.24396	-0.149735	-0.358721	0.252608	-0.00852126	0.0762295	-0.28343	0.143921	-0.0964972	-0.347013	0.339365	0.226678	0.250923	0.060636	-0.202154	-0.278878	0.383139	-0.0789025	0.143383	-0.241438	-0.18404
ENSMUSG00000014767	Tbp	0.074448	-0.213259	-0.0398115	-0.0857208	-0.0555668	-0.00678834	0.340906	0.278626	-0.318553	0.14392	0.0197017	0.0107653	-0.00220049	-0.110342	0.220264	0.0751614	0.122428	0.21872	0.34628	0.350599	0.723375	0.0522968	0.212844	-0.0191846	0.0994831	-0.127975
ENSMUSG00000014771	Pdcd2	-0.0652892	0.0827717	-0.3997	-0.0479451	-0.202152	-0.166924	-0.265188	0.0922716	0.125959	0.262733	-0.0430785	0.216193	-0.0582091	0.19778	-0.013718	0.346006	0.179123	-0.0537275	-0.0234419	0.137635	0.189256	0.15529	0.332028	0.399961	0.31341	0.350036
ENSMUSG00000014778	Fhod1	0.659765	0.705193	0.0801307	0.248829	0.365602	0.094049	0.246208	0.326578	0.363915	0.153414	-0.114148	0.164599	0.376368	0.506676	0.583401	-0.04229	0.0217264	-0.114718	0.0348216	-0.629733	-0.225685	-0.327577	-0.0345661	-0.0438552	-0.131851	0.0621206
ENSMUSG00000014856	Tmem208	0.0512493	0.0949065	0.0943245	-0.0919791	0.135429	-0.0850803	0.186505	-0.0297992	0.317584	-0.246295	0.268122	0.16886	0.244713	0.177652	0.361875	-0.172297	0.0533842	-0.0768336	-0.0279385	-0.202164	-0.0761502	-0.0142034	0.0434331	-0.183506	0.133369	-0.0141424
ENSMUSG00000014859	E2f4	-0.214456	-0.0509128	-0.290181	-0.445659	-0.592799	-0.0198251	-0.120202	0.0508044	-0.331841	-0.031549	-0.241833	0.121422	-0.0151778	0.033708	0.0800395	-0.0960814	-0.248632	0.0409742	0.241924	0.456679	0.160584	0.087556	0.465124	0.345316	0.308505	0.0454444
ENSMUSG00000014867	Surf4	0.584026	0.72317	0.332959	0.427521	0.502784	0.0696301	0.31022	0.271628	0.424816	0.433746	0.241948	0.364931	0.502468	0.528883	0.4807	-0.048176	0.0518493	-0.114987	-0.0647376	-0.348616	-0.283771	-0.210265	-0.0205614	-0.0843107	-0.181328	0.270413
ENSMUSG00000014873	Surf2	0.018024	-0.0204254	0.10843	-0.0169395	-0.131707	-0.187354	0.118247	0.254633	-0.0260436	0.665983	0.466012	0.422098	0.504086	0.212836	0.14715	-0.314894	0.00212071	-0.519368	-0.11804	0.136621	0.0296001	-0.198638	0.0440854	0.0105787	-0.166947	0.410501
ENSMUSG00000014905	Dnajb9	0.110912	0.208948	0.0546893	-0.068322	-0.0683488	0.0493527	0.172477	0.22019	-0.30651	0.277997	-0.00624518	0.216516	0.228095	0.179538	0.224198	-0.33116	-0.140679	-0.405528	0.115322	-0.0831394	-0.139357	-0.274317	0.0139153	-0.158384	-0.445207	-0.0401718
ENSMUSG00000014932	Yes1	0.0669677	0.431623	0.123178	0.516377	0.580584	0.00610644	0.0592627	-0.440829	0.367514	-0.272461	0.123653	-0.318776	0.0490379	0.178905	0.0368109	0.243799	0.110113	0.0973075	-0.0673287	-0.467249	-0.413218	0.193396	-0.0238547	-0.408902	-0.0879356	-0.388105
ENSMUSG00000015013	Trappc2l	0.431184	0.145793	0.511654	0.258853	0.489917	-0.254226	0.199675	0.0722176	0.157527	0.0808611	0.0527097	-0.0620422	0.00393373	-0.181126	-0.0476213	-0.00817126	0.455331	0.0645544	0.316697	-0.290894	-0.099441	-0.419857	-0.543973	-0.396508	-0.134387	0.262606
ENSMUSG00000015016	Acsf3	0.0531492	0.575728	-0.116783	0.29739	0.41854	-0.123518	-0.33425	-0.389998	0.345872	0.0442001	0.131625	-0.107188	0.304607	0.316831	0.121836	0.273103	0.211578	-0.244604	-0.224843	-0.613036	-0.52118	0.103973	0.108777	0.00597258	-0.180913	-0.134871
ENSMUSG00000015027	Galns	0.365485	0.291255	-0.195075	0.02791	0.232483	0.104102	0.028319	0.284922	0.175885	0.545057	0.03075	0.106999	0.473099	0.325048	0.257881	0.0997812	0.104278	-0.296255	-0.187329	-0.322543	0.101329	-0.117643	0.0546923	0.40053	-0.182087	0.0763654
ENSMUSG00000015092	Edf1	0.810624	0.411213	0.202669	-0.0430284	0.358041	0.116296	0.199071	0.344291	-0.0826346	0.059627	-0.32565	-0.0932229	0.145903	-0.0393598	0.314537	0.0784829	0.34223	0.231913	0.405522	-0.475377	0.231565	-0.496804	-0.26474	-0.0663382	-0.281636	0.011482
ENSMUSG00000015095	Fbxw5	0.465856	0.0419032	0.504259	0.0572496	0.129668	0.0516117	0.224424	0.526415	0.167261	0.322148	0.0726279	0.4216	0.0909811	-0.0559306	0.0342183	-0.381985	0.102192	-0.172648	0.234729	-0.150798	-0.0191324	-0.345821	-0.425285	-0.0188486	-0.25317	0.551486
ENSMUSG00000015176	Nolc1	0.185102	0.20716	0.00751816	0.154578	0.148919	-0.108073	-0.0761971	0.111455	0.349744	0.432576	0.290275	0.207118	0.462992	0.264304	-0.0127996	0.208194	0.171206	-0.0787554	-0.200449	-0.0169623	0.0454259	-0.00114576	0.0798886	0.200217	0.214145	0.345954
ENSMUSG00000015189	Casd1	0.732136	0.697313	0.279066	0.282365	0.573871	0.325047	0.413762	0.264561	0.326693	0.14156	0.0136962	0.131972	0.498013	0.426641	0.459462	-0.0812255	-0.00649824	0.0115085	-0.0873623	-0.544346	-0.264634	-0.302133	-0.143749	-0.0388937	-0.288567	-0.00484862
ENSMUSG00000015214	Mtmr1	0.075342	0.236875	-0.308353	-0.142887	-0.104084	-0.305162	-0.124131	-0.110035	0.274464	-0.214768	-0.311793	-0.105136	-0.201062	0.191173	0.228685	0.207045	0.0995833	0.0241229	0.108368	-0.184823	-0.056214	-0.14099	0.167081	0.0788374	0.538169	0.101329
ENSMUSG00000015217	Hmgb3	0.0147233	0.197845	0.36348	0.49514	0.409572	0.212366	0.363049	0.12256	0.54781	0.430676	0.706024	0.38472	0.574923	0.462051	0.184596	-0.238038	-0.251108	-0.404649	-0.500878	-0.0906168	-0.278764	0.163969	-0.0225228	-0.203029	-0.145522	0.030793
ENSMUSG00000015222	Map2	0.246675	0.100941	0.435573	0.444144	0.383735	0.194819	0.398347	0.0209202	0.219355	0.126155	0.269846	-0.0601276	0.212841	0.0725332	-0.0251784	-0.0148317	-0.108546	0.285131	-0.214287	0.0953483	-0.0296295	-0.0261409	-0.170565	-0.160375	0.077858	0.0149746
ENSMUSG00000015243	Abca1	0.2294	-0.109965	0.104777	0.109856	0.01777	-0.331617	-0.271677	-0.0491165	-0.403252	0.237278	-0.282159	-0.323123	-0.428054	-0.462711	-0.504508	0.334417	0.464118	0.148263	0.214414	-0.0319453	0.185616	-0.475247	-0.439892	-0.225981	-0.190642	0.289807
ENSMUSG00000015247	Nipsnap3b	0.401153	0.486643	0.0638534	-0.0080956	-0.0375289	-0.137514	-0.0386607	0.14889	0.0578771	0.337947	0.113828	0.426487	-0.0357746	0.246753	0.263936	0.046695	0.235496	-0.127004	0.207801	-0.12235	0.00174422	-0.256659	0.130907	-0.243573	-0.248338	0.508088
ENSMUSG00000015290	Ubl4a	0.235554	0.340717	0.112565	0.0841846	-0.00350814	0.414256	0.507426	0.359154	-0.124312	0.0101183	0.0233297	0.304207	0.208068	0.414873	0.665795	-0.302971	-0.371511	-0.142305	0.0669606	-0.138253	0.104289	-0.0602748	0.277562	-0.15611	-0.294329	-0.380034
ENSMUSG00000015305	Sash1	0.5305	0.329967	0.382785	0.34858	0.72204	-0.121112	0.219465	0.0016469	0.333652	0.17671	0.196985	-0.12024	0.363054	-0.0237888	0.0703877	-0.0803713	0.411644	-0.105961	0.205994	-0.60638	-0.272755	-0.203399	-0.44326	-0.293827	-0.442873	0.127013
ENSMUSG00000015312	Gadd45b	0.207934	0.248924	0.045572	0.331942	0.33122	0.385912	0.0939665	0.142586	0.310252	0.067499	0.0165041	-0.055154	0.306121	0.282807	0.0561745	0.155214	-0.105837	-0.0393617	-0.320451	-0.365278	-0.0737721	0.0408706	-0.0648839	0.110986	-0.0116467	-0.289374
ENSMUSG00000015354	Pcolce2	-0.0344245	-0.00153283	0.395471	0.422829	0.495338	0.0390375	-0.014695	-0.29895	0.52955	-0.0763236	0.346789	-0.10031	0.143014	-0.0979996	-0.395549	0.01071	0.0698402	0.10368	-0.258153	-0.126304	-0.416983	0.278077	-0.280341	0.0203923	0.0947469	0.149823
ENSMUSG00000015357	Clpx	0.135702	-0.369042	0.478324	-0.0733258	0.0489705	0.282259	0.53111	0.513989	-0.0200303	0.165204	0.317659	0.319221	0.295757	-0.0959011	0.185907	-0.647471	-0.368201	-0.0541864	-0.180545	0.250955	0.147748	-0.177085	-0.354629	-0.168794	-0.208716	0.104725
ENSMUSG00000015377	Dennd6b	-0.19939	0.299113	-0.00554523	0.290349	-0.0285404	-0.0828992	0.260535	-0.017647	0.468548	0.423962	0.569773	0.424305	0.504649	0.693547	0.274755	-0.164978	-0.262928	-0.587511	-0.380999	0.0771415	-0.337319	0.0756034	0.340163	-0.114445	0.252307	0.157165
ENSMUSG00000015405	Ace2	-0.19609	0.0509079	0.381929	0.524345	0.311519	0.431425	0.359434	-0.0538298	0.297615	0.287449	0.60019	0.222927	0.381043	0.311973	-0.133051	-0.207955	-0.382459	-0.218917	-0.501456	0.16818	-0.362941	0.330863	-0.0220653	-0.114794	-0.23413	-0.149636
ENSMUSG00000015451	C4a	-0.300402	-0.176178	-0.0843451	-0.142646	-0.0289999	-0.429594	-0.263224	-0.515153	0.117336	-0.408337	0.0217271	-0.214847	-0.342938	-0.349825	-0.38949	0.307913	0.501565	0.313187	0.528861	0.216588	0.0378045	0.372316	0.13795	-0.0379773	0.40878	0.176258
ENSMUSG00000015461	Atf6b	0.0898493	0.138607	-0.225023	0.195833	0.417204	-0.355665	-0.0298426	-0.366632	0.0475902	-0.0802973	-0.0206469	-0.521365	0.0997441	-0.0610268	-0.00472249	0.51921	0.54575	0.151076	0.240316	-0.317282	0.243929	0.0944026	0.121485	-0.077572	0.167476	-0.316643
ENSMUSG00000015468	Notch4	0.124055	0.252548	-0.0960037	0.331805	0.193164	-0.240195	-0.308754	-0.331806	0.162394	-0.00269611	-0.248715	-0.346477	-0.303676	-0.0624066	-0.491468	0.508616	0.381721	0.0309744	0.0473801	-0.313035	-0.273836	-0.154638	-0.205694	-0.0887097	0.0928707	0.168853
ENSMUSG00000015522	Arnt	0.0818252	0.277601	-0.111404	0.107995	-0.00850433	-0.182783	0.366776	0.121015	0.0210923	0.363802	0.283399	0.229377	0.271344	0.461821	0.658501	-0.221755	-0.148075	-0.382403	-0.0362626	-0.0496836	0.0196653	-0.115959	0.304594	-0.314131	-0.157716	-0.023074
ENSMUSG00000015536	Mocs2	0.174241	-0.01041	0.260708	0.146734	0.218165	0.11499	0.592123	0.0828355	-0.161587	-0.0966256	0.122942	-0.0657804	0.122918	-0.0352471	0.33346	-0.21912	-0.0192306	0.134532	0.306175	0.0230066	0.25145	0.0242081	0.0610624	-0.18769	-0.154863	-0.293777
ENSMUSG00000015542	Nat9	-0.212952	-0.118928	-0.218403	-0.304016	-0.0730984	-0.159053	-0.276114	-0.130371	0.270331	-0.00105903	0.089138	0.116875	0.0482093	-0.0691587	-0.0322346	0.0129731	0.12355	0.0376489	0.188473	0.187573	-0.00603985	0.482276	0.246673	0.443717	0.184548	0.249675
ENSMUSG00000015568	Lpl	0.270325	0.40746	0.116685	0.358558	0.131513	-0.314688	-0.0633055	-0.190206	0.289669	0.144514	0.0463151	-0.0437167	-0.0437471	0.115154	-0.0563491	0.210752	0.234852	0.081367	0.189327	-0.148121	-0.218671	-0.100626	0.033526	-0.192484	0.17325	0.410252
ENSMUSG00000015597	Zfp318	-0.43611	0.280326	-0.563974	-0.00697616	-0.271752	-0.08044	-0.283966	-0.386674	0.115728	-0.104369	0.0745338	0.053402	0.0774815	0.413418	0.150427	0.348714	-0.101076	-0.0746753	-0.0915255	0.138245	-0.0598166	0.554016	0.829371	0.306049	0.415262	-0.190247
ENSMUSG00000015605	Srf	0.327586	0.18367	0.433244	0.0293014	0.0521782	0.226462	0.282382	0.28066	0.172369	-0.127537	0.0807473	0.340791	-0.0155397	0.130923	0.362554	-0.567967	-0.351473	-0.0320482	-0.0871198	-0.218479	-0.345798	-0.266395	-0.291008	-0.39345	-0.36216	0.175834
ENSMUSG00000015647	Lama5	0.117563	0.393322	0.0435507	0.395459	0.543063	0.188758	-0.0891527	-0.371504	0.384508	-0.184594	0.109727	-0.230714	0.0767248	0.209367	-0.0630766	0.316933	0.0650632	0.115559	-0.486827	-0.469945	-0.384899	0.110432	-0.0738302	-0.0673755	-0.0462744	-0.241118
ENSMUSG00000015668	Pdzd11	0.0718374	0.0943834	0.0231698	0.050376	-0.058504	0.104395	0.119656	0.337964	0.481601	0.379996	0.307889	0.554625	0.195942	0.395833	0.132527	-0.118981	-0.0362606	-0.415656	-0.233848	-0.024845	-0.0749252	-0.0306651	0.0199563	0.157532	0.0979472	0.456604
ENSMUSG00000015672	Mrpl32	0.203996	0.182081	0.341372	0.185774	0.174969	-0.0234067	0.306251	0.303415	0.521837	0.206139	0.463889	0.576888	0.25899	0.302388	0.395853	-0.139762	0.0368946	0.0505566	0.0537689	0.128284	0.0746919	0.145358	0.118315	-0.0321254	0.204436	0.438538
ENSMUSG00000015702	Anxa9	0.00104563	-0.423686	-0.0374064	-0.342298	-0.148344	0.0837608	-0.00331068	0.232875	-0.114753	-0.0208314	-0.188512	-0.079517	-0.0291197	-0.346544	-0.257558	0.13615	0.186499	0.425092	0.335221	0.459725	0.501675	0.117976	-0.0716819	0.404267	0.338995	0.116736
ENSMUSG00000015709	Arnt2	0.0736895	0.154674	-0.0928411	-0.198837	-0.195222	0.46512	0.392954	0.212985	-0.239797	0.0966924	-0.0018316	0.188389	0.239691	0.225159	0.450739	-0.149706	-0.36396	0.116252	0.234339	0.369284	0.363955	0.27704	0.571133	0.254918	-0.0677645	-0.31745
ENSMUSG00000015747	Vps45	0.255557	0.0556013	0.394581	0.0665357	0.127697	0.421683	0.648345	0.369777	0.170064	-0.00651894	0.14319	0.236611	0.388386	0.132134	0.335378	-0.417327	-0.390632	0.220425	0.149763	0.283936	0.0360882	0.097517	0.0183741	0.0483459	0.0483959	-0.0355873
ENSMUSG00000015755	Tab2	0.121076	0.274223	-0.140346	-0.220587	0.127715	-0.120286	-0.090806	-0.231986	0.232487	-0.239062	0.073027	0.0207684	0.12781	0.0362896	0.164056	0.160728	0.349368	0.167661	0.467964	-0.147354	0.0566936	0.327243	0.337674	0.0361624	0.0521482	0.0328194
ENSMUSG00000015757	Ppil4	-0.0089593	0.373743	-0.357391	-0.0169926	0.196243	0.271082	-0.432842	-0.256544	0.0323786	-0.210923	-0.268634	-0.278644	0.19045	0.120999	-0.0344077	0.465349	0.104043	0.213686	-0.0751547	-0.307832	-0.129171	0.337895	0.2878	0.441999	0.00644863	-0.435188
ENSMUSG00000015766	Eps8	-0.141522	-0.027382	-0.140925	0.165211	0.177583	-0.0126962	-0.444071	-0.414954	0.0232214	-0.130576	-0.162682	-0.428827	-0.260777	-0.229484	-0.588444	0.66724	0.34911	0.311005	-0.108596	-0.0348531	0.0301055	0.193921	-0.0614874	0.169803	0.194499	-0.147611
ENSMUSG00000015790	Surf1	0.382015	0.323162	0.557844	0.227374	0.265577	0.231131	0.35997	0.326207	0.211134	0.460113	0.408953	0.538082	0.46476	0.250022	0.201969	-0.42486	-0.133344	-0.200685	-0.0805566	-0.0126987	-0.293126	-0.142545	-0.160028	-0.0206623	-0.410346	0.420563
ENSMUSG00000015806	Qdpr	0.0352529	-0.133427	-0.197631	-0.598066	-0.344628	0.47489	0.262622	0.362886	-0.267161	-0.326737	-0.262873	0.146319	0.0274917	0.00126249	0.505372	-0.159414	-0.308642	0.328611	0.348885	0.332751	0.622481	0.239225	0.453892	0.318292	0.151488	-0.427771
ENSMUSG00000015843	Rxrg	0.247082	0.123345	0.0926977	0.156678	0.225975	-0.237485	-0.138488	0.122871	0.348439	0.223668	0.0477676	0.0892508	0.0958467	0.135346	-0.0211776	0.0105679	0.221587	-0.42753	-0.390677	-0.565468	-0.276773	-0.515297	-0.463588	-0.0447505	-0.0264485	0.33656
ENSMUSG00000015846	Rxra	0.0491786	0.0177508	0.256657	0.0887363	0.058318	0.280033	0.370948	0.411897	0.106503	0.598646	0.513211	0.515366	0.552702	0.401774	0.295774	-0.590529	-0.452669	-0.594854	-0.567488	0.0258827	-0.208755	-0.184275	-0.129217	-0.088276	-0.425273	0.130766
ENSMUSG00000015850	Adamtsl4	-0.0495555	0.282748	-0.301271	-0.0557623	-0.137739	0.36443	-0.167893	-0.189506	-0.193095	-0.283203	-0.342235	-0.18422	-0.249517	0.163076	0.0562756	0.410923	-0.170031	0.226206	-0.120802	-0.0316544	0.128356	0.127735	0.394806	0.126372	0.116915	-0.514011
ENSMUSG00000015852	Fcrls	0.388547	0.0984578	-0.0691396	-0.45781	-0.0556662	-0.0533547	0.104786	0.219102	0.00941102	-0.320947	-0.355427	0.021877	0.00970466	-0.0950661	0.253523	-0.0694555	0.266876	0.200127	0.571098	-0.182823	0.163621	-0.22937	-0.0625524	0.0944771	0.0828711	0.124862
ENSMUSG00000015869	Prpsap1	0.0525325	0.132268	0.0950709	0.152492	0.233956	0.0317246	0.051225	-0.0285053	0.536423	-0.0582649	0.182015	0.0851454	0.434196	0.18344	-0.0909515	0.0410933	0.0750495	0.122487	-0.00994641	-0.0307642	-0.252994	0.27223	0.0251181	0.328362	0.3624	0.197051
ENSMUSG00000015879	Fam184b	-0.0209443	-0.0267611	0.4956	0.290214	0.0118907	0.122378	0.498954	0.243534	0.176643	0.515217	0.668235	0.522244	0.416581	0.24036	0.157177	-0.429512	-0.329199	-0.182863	-0.1348	0.489096	-0.0600659	0.0928492	0.0472331	-0.211735	-0.118673	0.312638
ENSMUSG00000015932	Dstn	-0.399003	-0.333507	-0.321303	-0.324145	-0.649865	0.181119	0.157349	0.171563	-0.355503	-0.117578	-0.139164	0.141588	-0.20303	0.138867	0.170791	-0.130518	-0.54745	0.0752875	-0.21247	0.627286	0.366806	0.0899962	0.435104	0.189467	0.43355	-0.204566
ENSMUSG00000015942	Gtf2ird2	0.151648	0.21315	-0.0666785	0.331856	0.22781	0.070085	0.181343	0.0849252	0.223386	0.251541	0.0410686	-0.103211	0.260082	0.382396	0.1085	0.282912	0.0225396	-0.234356	-0.427844	-0.284584	0.00136085	-0.298774	-0.0916464	-0.0197076	0.176768	-0.205286
ENSMUSG00000015943	Bola1	0.0332753	-0.134251	0.125884	0.157848	0.0438696	0.165881	-0.136694	-0.025741	0.0157907	-0.129991	-0.100562	-0.080036	-0.431389	-0.22392	-0.336258	0.20907	0.0828351	0.204528	-0.0985359	-0.0504517	0.0687092	7.71245e-05	-0.247747	-0.0749908	-0.0871807	0.0310206
ENSMUSG00000015944	Castor2	-0.151344	0.0860114	0.203956	0.0367906	-0.317476	-0.120968	0.21615	0.229924	0.0359895	0.439405	0.440628	0.613041	0.15194	0.366207	0.417859	-0.557158	-0.403482	-0.506564	-0.0890395	0.270826	-0.191686	-0.076176	0.201474	-0.322595	-0.157541	0.326247
ENSMUSG00000015961	Adss	0.226179	0.147067	0.334184	0.145645	0.0724527	-0.0220593	0.129899	0.282214	0.179103	0.129715	0.14131	0.258687	0.231055	0.173648	0.278427	-0.238412	-0.160174	-0.102843	-0.209463	-0.137588	-0.13781	-0.337252	-0.212906	-0.204054	0.0288821	0.17629
ENSMUSG00000016018	Skiv2l2	0.218724	0.159854	-0.0858184	-0.299934	-0.0766608	0.41258	-0.0300162	0.0139779	-0.110753	-0.42633	-0.507609	-0.249401	0.00491877	-0.0361129	0.0137742	0.119657	-0.146138	0.342268	0.036614	-0.10778	0.0301113	-0.148217	0.0202919	0.332311	0.220848	-0.335304
ENSMUSG00000016024	Lbp	-0.149755	0.0218873	-0.41685	-0.114147	-0.00615623	-0.622259	-0.407034	-0.380553	0.109089	-0.146316	-0.188103	-0.283107	-0.178608	-0.108796	-0.17268	0.521946	0.624245	0.171044	0.387162	-0.0426835	0.0889032	0.160553	0.21062	0.260916	0.508553	0.203214
ENSMUSG00000016087	Fli1	0.654007	0.318011	0.267598	0.165955	0.320203	0.149298	0.121701	0.288276	-0.109775	-0.119646	-0.409073	-0.165454	0.0511116	-0.0914151	0.0341488	-0.0320102	0.0900624	0.142284	0.0741731	-0.564837	-0.113291	-0.580242	-0.477407	-0.143564	-0.273016	-0.0139634
ENSMUSG00000016128	Stard13	0.288591	0.181868	0.365715	0.100705	0.368722	0.741984	0.434936	0.218029	0.346177	-0.0328093	0.222404	0.206309	0.453086	0.180394	0.181411	-0.145128	-0.22637	0.233098	-0.00964438	0.00686974	0.0344007	0.370592	0.0609429	0.306985	-0.170681	-0.252921
ENSMUSG00000016150	Tenm1	0.0343882	0.399708	-0.0565776	0.548124	0.311379	-0.248685	-0.278338	-0.433335	0.377839	0.171254	0.0966274	-0.262631	-0.0978769	0.19392	-0.217157	0.526441	0.257631	-0.0676766	-0.270667	-0.32443	-0.348068	-0.0290939	-0.0342911	-0.224732	0.133106	0.0858424
ENSMUSG00000016181	Diexf	0.185789	0.266415	0.132839	0.182632	0.306782	0.17006	0.206011	0.125894	0.57216	-0.012	0.263664	0.174551	0.525165	0.375772	0.306783	-0.0157876	-0.104602	0.0419207	-0.246663	-0.174973	-0.0962534	0.132555	0.0997817	0.15172	0.339225	-0.0161806
ENSMUSG00000016194	Hsd11b1	-0.230322	0.152513	-0.0216847	0.210188	0.304615	-0.0941768	-0.145737	-0.390436	0.571033	-0.129779	0.256517	-0.100715	0.25347	0.207713	-0.0891518	0.0141567	-0.0290703	-0.102558	-0.229263	-0.201176	-0.588245	0.369468	-0.00102413	0.00441107	0.123415	-0.052921
ENSMUSG00000016253	Nelfcd	0.0352361	-0.236458	0.313981	-0.258192	-0.125759	0.449799	0.142447	0.448987	-0.00240888	0.105201	0.133446	0.383735	0.200522	-0.0796261	0.107547	-0.601691	-0.457476	-0.172328	-0.08792	0.132641	-0.0375498	0.024449	-0.226759	0.00742439	-0.415808	0.0143842
ENSMUSG00000016283	H2-M2	0.00382097	-0.26007	0.408123	0.462317	0.522881	0.041997	0.0851053	-0.172369	0.141801	-0.015621	0.13449	-0.332927	-0.202065	-0.367313	-0.473542	0.162198	0.238541	0.145732	-0.112296	-0.129219	-0.0348953	0.0529139	-0.531151	-0.173103	-0.154558	-0.114086
ENSMUSG00000016346	Kcnq2	-0.363137	0.141908	-0.516092	-0.185763	-0.0942059	0.12356	-0.00700667	-0.30637	0.115953	-0.240266	0.098289	-0.0564526	0.111577	0.357906	0.369089	0.279127	-0.135024	0.0863868	-0.0434588	0.166089	0.217229	0.604223	0.772687	0.194843	0.352486	-0.541891
ENSMUSG00000016349	Eef1a2	-0.219578	0.185264	-0.667439	-0.276832	-0.415642	0.097844	-0.0687621	-0.109993	-0.0289444	-0.0522179	-0.1141	0.0345883	0.0551533	0.434805	0.369951	0.268826	-0.257078	0.0462635	-0.150435	0.24859	0.263344	0.31772	0.805257	0.387127	0.457608	-0.242239
ENSMUSG00000016409	Nkap	-0.0727417	-0.389697	0.346097	0.0174819	-0.0886437	-0.193378	0.16083	0.279342	0.204584	0.418839	0.43392	0.358488	0.17186	-0.0926595	-0.0693617	-0.381906	-0.075402	-0.224591	-0.156648	0.344884	0.0443457	-0.115489	-0.27491	-0.021702	0.109944	0.55527
ENSMUSG00000016481	Cr1l	-0.010031	0.386865	0.173071	0.30214	0.361989	-0.30516	-0.205315	-0.256461	0.5912	0.180724	0.51235	0.295718	0.344363	0.232992	0.0384249	0.0304698	0.24355	-0.0903574	0.0393725	-0.147102	-0.450269	0.402278	0.164078	-0.0315606	-0.000454169	0.431251
ENSMUSG00000016487	Ppfibp1	-0.376766	0.210804	-0.23772	0.186938	-0.0721235	-0.451252	-0.42004	-0.440312	0.422741	0.0454631	0.284112	0.130121	-0.0926603	0.287304	-0.0971762	0.310882	0.0928699	-0.0479286	-0.26431	0.131792	-0.324152	0.3171	0.371289	-0.0171886	0.513075	0.359505
ENSMUSG00000016493	Cd46	0.238761	0.0345639	0.325214	-0.0521881	0.235396	0.102784	0.273527	0.213311	0.21525	0.292169	0.447676	0.354901	0.418146	0.0281353	0.18066	-0.0859526	0.285035	0.0518899	0.32536	0.137201	0.319849	0.207065	0.0918764	0.126308	-0.10348	0.222917
ENSMUSG00000016528	Mapkapk2	-0.520991	-0.330704	-0.0983508	-0.32889	-0.490803	-0.103185	0.00802243	0.102809	0.190873	0.143037	0.44441	0.569112	0.0561114	0.134014	0.160119	-0.325931	-0.25586	-0.168109	0.156301	0.681538	0.185968	0.578923	0.514549	0.149727	0.313384	0.297524
ENSMUSG00000016534	Lamp2	-0.293648	-0.326462	0.0396314	-0.325221	-0.458765	0.130235	0.331735	0.413503	0.120201	0.0875924	0.297461	0.620244	0.102857	0.141783	0.361024	-0.511026	-0.420002	-0.0773239	0.212123	0.672833	0.29042	0.405843	0.40629	0.180966	0.291249	0.231591
ENSMUSG00000016541	Atxn10	0.361281	0.350466	0.649529	0.742268	0.515457	0.0791534	0.476268	0.0566059	0.450943	0.437318	0.553085	0.240714	0.245519	0.330417	-0.00344781	-0.126177	-0.057487	-0.161885	-0.41697	-0.150356	-0.386264	-0.293936	-0.366626	-0.505484	-0.196879	0.331959
ENSMUSG00000016552	Foxred2	0.435213	0.231719	0.628345	0.219745	0.435648	0.528377	0.2345	0.13739	0.142311	-0.266318	-0.0383235	0.0673675	0.107239	-0.167794	-0.0830457	-0.143034	-0.0288977	0.45819	0.22508	-0.147075	-0.199385	0.0917093	-0.30546	0.0362749	-0.312205	-0.0340522
ENSMUSG00000016624	Phf21b	0.119723	0.349546	0.0369205	0.146296	-0.0816343	-0.127616	0.142943	0.279459	0.320301	0.619366	0.333096	0.533814	0.44786	0.53353	0.261959	-0.0620223	-0.0585693	-0.291405	-0.0541601	0.217601	-0.0616585	-0.0337783	0.300859	0.15328	0.266396	0.51456
ENSMUSG00000016637	Ift27	0.0388804	0.121494	-0.0777763	0.300482	0.127926	0.0219874	0.195403	-0.00642236	-0.0216355	0.36635	0.20695	-0.0186902	-0.0171502	0.28418	0.104473	0.17032	-0.0339178	-0.153455	-0.419664	0.00422461	0.0716332	-0.177122	0.0133757	-0.304886	-0.106924	-0.0645355
ENSMUSG00000016756	Cmah	0.309638	0.0944065	0.018587	0.0932595	0.112099	-0.0882492	-0.0993394	-0.193881	-0.259014	-0.0772593	-0.345805	-0.466763	-0.235648	-0.304517	-0.290417	0.394368	0.242176	0.399242	0.0684199	-0.0625949	0.154707	-0.321106	-0.173927	-0.031351	0.0875929	0.00843502
ENSMUSG00000016933	Plcg1	0.0676344	-0.242623	-0.21983	-0.460052	-0.380762	0.153533	0.0672733	0.384211	-0.485972	-0.0837601	-0.352365	-0.00146801	0.121918	-0.206158	0.248908	-0.0594976	-0.0835457	0.281877	0.392404	0.314237	0.599219	0.0275049	0.257826	0.45657	0.112885	-0.169359
ENSMUSG00000016940	Kctd2	-0.295253	0.188873	-0.150649	0.178732	0.0905142	0.00352214	-0.0768496	-0.445407	0.298017	-0.0575181	0.342086	0.047009	0.168309	0.228081	-0.149042	0.318515	0.100644	0.0625604	-0.0376995	0.177712	-0.12231	0.599921	0.502801	0.202846	0.256569	-0.0388396
ENSMUSG00000017002	Slpi	0.379912	0.366495	0.00737393	-0.234384	0.00990781	0.171512	-0.0262913	0.300415	0.144625	0.377562	0.0503235	0.365297	0.430441	0.330312	0.271872	-0.166813	-0.0401508	-0.352603	-0.199047	-0.258008	-0.163558	-0.358608	-0.0567084	0.182058	-0.252498	0.26711
ENSMUSG00000017009	Sdc4	0.229686	-0.0724286	0.184315	0.00420575	0.128365	0.266214	0.450861	0.293242	-0.21894	-0.0311716	0.0323868	0.0488098	0.0293831	-0.0182776	0.301725	-0.0766569	-0.0372142	0.203456	0.016433	0.0681474	0.469982	-0.13595	-0.000898366	-0.0800658	-0.0483578	-0.233854
ENSMUSG00000017057	Il13ra1	-0.0206466	0.0280721	-0.105594	-0.0237256	0.185176	-0.260241	-0.153525	-0.25667	0.185103	-0.129805	-0.0147211	-0.19224	0.0740801	-0.0884205	-0.256292	0.175104	0.489883	-0.0630422	0.234708	-0.25947	-0.209755	0.0142413	-0.134113	0.0969195	0.0941755	0.143996
ENSMUSG00000017119	Nbr1	-0.0394154	0.154152	0.176469	0.165525	0.0947073	-0.306448	-0.158441	-0.409134	-0.146104	-0.160253	0.054703	-0.144651	-0.268738	-0.231466	-0.13186	0.147776	0.184465	0.340794	0.295506	0.137281	-0.0731086	0.146125	0.138033	-0.292748	0.00439565	0.103813
ENSMUSG00000017132	Cyth1	0.0725875	0.103582	0.373572	0.108166	0.172574	0.440314	0.57136	0.465698	0.350297	0.412971	0.566113	0.618764	0.647616	0.482084	0.554033	-0.614714	-0.473421	-0.440312	-0.241462	0.0584881	-0.10431	0.151632	0.0792375	0.0323057	-0.292735	-0.0564164
ENSMUSG00000017144	Rnd3	-0.158296	-0.026226	-0.324198	0.125221	-0.0558617	-0.369619	-0.0937338	-0.210502	-0.273604	0.362607	0.115245	-0.22302	0.0891003	0.0107156	-0.12717	0.436906	0.385518	-0.104328	0.151689	0.152962	0.353158	0.0477544	0.295728	-0.0160127	0.0930436	-0.0578292
ENSMUSG00000017176	Nt5c3b	0.286784	0.206849	0.126701	-0.186643	-0.256031	0.318453	0.408574	0.474725	-0.10029	0.236074	0.0509129	0.49499	0.223027	0.286884	0.545251	-0.52708	-0.401027	-0.197995	0.178981	0.112608	0.0288459	-0.121331	0.182177	-0.0243916	-0.363039	0.13145
ENSMUSG00000017210	Med24	0.257039	0.424083	0.303588	0.326936	0.203446	0.160968	0.368949	-0.0874108	0.103013	0.0420449	0.302008	0.202664	0.00436127	0.24048	0.284849	0.0382991	-0.0622145	0.230634	0.0645377	0.103011	0.00355085	0.0905057	0.247497	-0.373573	-0.136981	0.032529
ENSMUSG00000017286	Glod4	-0.158391	0.400049	-0.313655	0.0464186	-0.058533	-0.0806009	-0.365219	-0.467708	0.152768	-0.0969946	-0.0616155	-0.117138	0.018756	0.18512	-0.0704995	0.421146	0.0995138	0.155031	0.0929641	0.0489175	-0.223557	0.387204	0.515435	0.292395	0.289723	-0.00739032
ENSMUSG00000017288	Vps53	0.469377	0.0700003	0.0540095	-0.226356	0.0424114	0.450053	0.293161	0.738854	-0.134307	0.282795	-0.165576	0.263565	0.486775	0.134542	0.438768	-0.144382	-0.069997	-0.0236469	0.0857738	-0.0965483	0.45194	-0.250097	-0.0459938	0.410277	-0.160406	-0.11682
ENSMUSG00000017299	Dnttip1	0.444917	0.311457	0.23591	-0.0176726	-0.218907	0.424564	0.459851	0.567813	-0.171752	0.219766	-0.079683	0.453309	0.0862922	0.333301	0.469374	-0.463859	-0.500599	-0.180787	-0.0379596	-0.0162026	-0.00150748	-0.435832	-0.00262288	-0.245839	-0.37175	0.0849733
ENSMUSG00000017390	Aldoc	-0.368456	0.236063	0.156072	0.480761	0.070429	0.00924076	-0.059822	-0.342581	0.538082	0.247105	0.686957	0.389274	0.163583	0.434673	-0.160584	-0.0878536	-0.261322	-0.366911	-0.492627	0.109356	-0.623718	0.432478	0.227948	-0.220809	-0.0357887	0.269522
ENSMUSG00000017412	Cacnb4	0.0174437	0.15158	-0.0537191	-0.0779821	-0.230924	0.339439	0.330917	0.141894	-0.357217	0.0327261	0.0108304	0.142379	0.275586	0.212496	0.394799	-0.211573	-0.432589	0.0396835	0.104511	0.261132	0.242439	0.182078	0.53563	0.153365	-0.102781	-0.352943
ENSMUSG00000017417	Plxdc1	0.156119	-0.0356221	0.415853	0.294695	0.0445267	0.278039	0.682535	0.494893	0.277608	0.293226	0.415517	0.461665	0.235366	0.324866	0.381189	-0.450326	-0.465026	-0.101708	-0.16336	0.262731	0.103374	-0.0200656	-0.0410301	-0.311559	-0.0194908	0.102898
ENSMUSG00000017446	C1qtnf1	-0.104397	-0.236531	-0.00184952	-0.217269	0.0510168	0.0446558	-0.260666	0.0204522	0.00688692	-0.343194	-0.269035	-0.175921	0.0816904	-0.263846	-0.236448	0.0614902	0.118736	0.0621115	-0.000505439	-0.183882	-0.0272725	-0.0188944	-0.253471	0.394413	0.198114	-0.193988
ENSMUSG00000017485	Top2b	0.377709	0.713734	0.267234	0.808778	0.619886	-0.147694	0.245719	-0.245923	0.566824	0.18669	0.301647	-0.0434946	0.233421	0.485861	0.125856	0.268229	0.186815	-0.0751582	-0.179548	-0.493604	-0.466303	-0.115127	-0.0403615	-0.414917	0.016733	0.10543
ENSMUSG00000017548	Suz12	0.320677	0.0865363	0.23457	0.113226	0.341657	0.179069	0.278069	0.342536	0.448145	0.291067	0.261211	0.245458	0.303123	0.186368	0.20862	-0.017612	0.166767	-0.0102659	0.0805918	-0.112632	0.168105	0.0604731	-0.142633	0.0355061	-0.0569473	0.129309
ENSMUSG00000017561	Crlf3	-0.547171	-0.122422	-0.561053	-0.253359	-0.200698	-0.383551	-0.446013	-0.397625	0.340196	-0.240585	0.0132484	-0.0662067	-0.174273	0.071622	-0.0785517	0.260405	0.175006	-0.0300287	0.105219	0.13055	-0.0709659	0.575486	0.44149	0.273332	0.558441	0.0634461
ENSMUSG00000017607	Tns4	0.319726	-0.0470014	-0.106924	-0.298654	-0.185402	0.220394	0.236261	0.540133	-0.118581	0.150284	-0.333948	0.129172	0.161066	0.0935205	0.172328	-0.0550992	-0.0514571	-0.0565785	0.0110818	0.0313732	0.314234	-0.435351	-0.112475	0.391037	0.188768	0.0927864
ENSMUSG00000017639	Rab11fip4	-0.163721	-0.189056	-0.138922	-0.0686172	-0.208434	0.0561646	0.130436	-0.0426261	-0.367582	-0.0154521	-0.019879	-0.136808	-0.0840606	-0.105897	0.0706143	0.170519	-0.101502	0.395323	0.233617	0.520196	0.606246	0.355525	0.48826	0.146561	0.243486	-0.29917
ENSMUSG00000017664	Slc35c2	-0.0333768	-0.345231	-0.0222129	-0.32118	-0.048262	0.164702	0.16999	0.319387	-0.344004	0.269047	0.106078	0.082929	0.328229	-0.164087	0.186042	-0.332455	-0.0906324	-0.192385	0.146863	0.141775	0.374758	0.0962816	-0.00439471	0.170778	-0.464566	-0.243924
ENSMUSG00000017670	Elmo2	-0.228292	-0.211321	0.0646948	0.214368	0.116875	0.149567	0.0697032	-0.284095	0.0529696	-0.458792	-0.0670389	-0.395154	-0.272217	-0.208429	-0.189971	0.224571	-0.123663	0.45565	-0.0730616	0.162834	0.0864699	0.292704	-0.00336196	-0.11844	0.314859	-0.432125
ENSMUSG00000017715	Pgs1	-0.0313582	-0.435597	0.511226	-0.211019	-0.123789	0.123487	0.218799	0.0739704	-0.14092	-0.333269	0.0827177	0.114476	-0.217284	-0.530849	-0.248487	-0.304292	-0.0343399	0.533745	0.460292	0.568378	0.23494	0.184702	-0.157761	-0.0628779	0.0923928	0.21442
ENSMUSG00000017734	Dbndd2	0.299554	0.733456	-0.0110511	0.449597	0.381748	0.0587265	0.261716	-0.0832192	0.210276	0.327216	0.249063	0.118711	0.312473	0.594577	0.50306	0.210737	0.00638965	-0.174622	-0.154841	-0.295405	-0.131274	-0.0208738	0.356048	-0.229113	-0.165746	-0.153992
ENSMUSG00000017754	Pltp	0.460205	0.280833	0.302256	-0.0543499	0.248601	0.53635	0.242918	0.25341	-0.304529	-0.0498919	-0.193217	0.00568162	0.19414	-0.0806917	0.221715	-0.142328	-0.0137131	0.179648	0.349287	-0.232311	0.1172	-0.0790667	-0.073366	0.0523719	-0.591148	-0.354262
ENSMUSG00000017756	Slc12a7	-0.164724	-0.162923	0.21573	-0.0097258	-0.0392497	-0.035348	-0.11975	-0.024492	0.252954	0.299728	0.537806	0.429209	0.146634	-0.066359	-0.263967	-0.123141	0.127166	-0.125466	-0.022737	0.308875	-0.103515	0.300218	-0.0131572	0.0613842	-0.152021	0.537361
ENSMUSG00000017774	Myo1c	0.0936308	0.0987919	-0.342463	-0.374732	-0.17954	0.367087	-0.209186	0.120395	-0.280678	-0.467999	-0.633521	-0.205134	-0.181445	-0.107052	0.180503	0.190044	-0.13825	0.452498	0.299863	-0.0505972	0.269949	0.191788	0.270153	0.349034	0.0541619	-0.473405
ENSMUSG00000017776	Crk	0.397109	0.421826	0.195284	0.234048	0.403744	0.43219	0.405647	0.405284	0.352372	0.631664	0.380068	0.409849	0.734526	0.501911	0.392172	-0.122482	-0.100278	-0.218916	-0.0829445	-0.0847252	0.0414624	0.173862	0.175275	0.298841	-0.285972	0.0286132
ENSMUSG00000017778	Cox7c	-0.315017	-0.0739054	-0.421111	-0.268919	-0.367885	0.264664	-0.268298	0.0819546	-0.017102	0.0784127	-0.127963	0.109265	0.144506	0.195259	-0.00566803	0.0287925	-0.294258	-0.161779	-0.289649	0.188538	-0.0293517	0.227257	0.314978	0.582008	0.220017	-0.0861165
ENSMUSG00000017830	Dhx58	0.213228	-0.00122088	0.517782	0.349316	0.421141	0.330861	0.469352	0.353694	0.210414	0.521844	0.503503	0.249627	0.649474	0.141454	0.0888377	-0.402037	-0.15389	-0.378986	-0.189844	-0.117453	-0.101926	-0.041154	-0.317037	-0.0884473	-0.486207	-0.0387333
ENSMUSG00000017831	Rab5a	0.172838	0.433344	-0.0294477	0.129035	0.114113	-0.280969	-0.340202	-0.19485	0.297364	0.197388	0.1379	0.187524	0.079308	0.0940049	-0.102767	0.332626	0.424329	0.155196	0.320403	-0.0192525	-0.112325	0.270535	0.298271	0.194755	0.12711	0.552173
ENSMUSG00000017837	Nkiras2	0.371907	0.0690281	0.198821	-0.164408	0.160547	0.237039	0.503092	0.5472	-0.132178	0.206284	0.037835	0.26497	0.46632	0.132367	0.568707	-0.349484	-0.015368	-0.0822615	0.311229	-0.0707785	0.335706	-0.144345	0.00232385	0.147055	-0.280086	-0.15889
ENSMUSG00000017843	Ppp2r5c	-0.233139	0.38682	-0.155928	0.136654	-0.353436	-0.0341584	-0.136935	-0.122445	0.0783307	0.201048	0.173455	0.399165	-0.0535548	0.441408	0.115015	-0.0334403	-0.287062	-0.2198	-0.0293055	0.247357	-0.33644	0.249903	0.527392	-0.108615	0.0298966	0.248398
ENSMUSG00000017858	Ift52	-0.202219	-0.517922	-0.0957989	-0.156933	-0.223045	0.231071	-0.00198383	0.154066	-0.157195	-0.127017	-0.142391	-0.0559748	-0.300677	-0.324627	-0.273666	0.118132	-0.057898	0.241999	0.04748	0.368718	0.48179	0.255686	0.00691138	0.313315	0.168265	-0.108119
ENSMUSG00000017929	B4galt5	-0.0577549	0.117965	0.192769	-0.0929194	-0.258921	0.252686	0.0105017	0.28545	-0.027161	0.185242	0.139386	0.570137	0.02293	0.175429	0.257784	-0.408961	-0.396215	-0.185375	0.0271837	0.221729	-0.148571	0.149155	0.187671	0.0407401	-0.282574	0.187206
ENSMUSG00000017999	Ddx27	0.104766	0.133119	0.213283	0.241634	0.19474	-0.402285	0.0061729	0.10368	0.226776	0.407906	0.41477	0.336169	0.297985	0.0876905	0.0256233	-0.0770505	0.370204	-0.191768	0.206004	-0.0212788	-0.140468	-0.011195	-0.0766321	-0.150499	-0.0997983	0.575307
ENSMUSG00000018040	Rrp7a	0.33604	0.218365	0.162718	0.146923	0.350602	-0.0199572	0.263619	0.133562	0.15383	0.547655	0.409979	0.183448	0.505437	0.189678	0.163281	-0.0198954	0.293005	-0.291861	0.102197	-0.180612	0.0943388	-0.0656614	-0.0404294	-0.0789161	-0.424089	0.13899
ENSMUSG00000018168	Ikzf3	0.346864	0.190464	0.0539951	-0.12702	-0.180093	0.456861	0.373574	0.685578	-0.26833	0.333346	-0.186445	0.333979	0.371989	0.339899	0.517585	-0.263786	-0.481495	-0.0622493	-0.193959	0.139294	0.290607	-0.365398	0.132059	0.276835	0.00369404	-0.109816
ENSMUSG00000018171	Vmp1	0.640658	0.730896	0.495553	0.599707	0.47887	0.206391	0.316368	0.255981	0.367437	0.32502	0.163044	0.298181	0.398173	0.456279	0.247029	-0.109634	-0.0798512	-0.186508	-0.215452	-0.504263	-0.455463	-0.406115	-0.226469	-0.231264	-0.27427	0.24285
ENSMUSG00000018322	Tomm34	0.576864	0.532362	0.301059	0.321404	0.405771	0.0926396	0.150314	0.292987	0.121927	0.379444	0.0658037	0.240864	0.382017	0.270941	0.256546	-0.00731248	0.103713	-0.00419554	-0.131671	-0.317128	-0.180642	-0.343342	-0.166327	0.0658953	-0.254617	0.290773
ENSMUSG00000018334	Ksr1	-0.215793	-0.216335	0.0789866	-0.0263503	-0.0400464	-0.0605722	-0.0750337	-0.0997923	0.321219	0.22297	0.460045	0.197839	0.353611	-0.00344558	-0.301117	-0.0827798	0.0535154	-0.224033	-0.188227	0.201723	-0.122122	0.217298	-0.010643	0.2051	0.127771	0.337669
ENSMUSG00000018362	Kpna2	-0.245929	-0.175357	0.251353	0.0861761	-0.259347	-0.211234	0.194712	0.0255559	0.203418	-0.0121232	0.307248	0.289059	-0.0494904	0.100802	0.0371492	-0.418568	-0.295392	-0.136904	-0.0955686	0.331947	-0.299448	-0.06812	-0.0862182	-0.375418	0.242216	0.358913
ENSMUSG00000018377	Vezf1	-0.403752	-0.469115	-0.347048	-0.556106	-0.5616	0.095849	0.121795	0.061539	-0.261475	-0.240989	-0.0304202	0.0712327	-0.184206	-0.0348996	0.250558	-0.236614	-0.411072	0.117095	-0.103533	0.572595	0.362599	0.177615	0.333559	0.0776072	0.273229	-0.186009
ENSMUSG00000018378	Cuedc1	0.739077	0.33755	0.336453	-0.0140466	0.276808	0.412309	0.436496	0.502845	-0.107373	0.099016	-0.241861	0.0659365	0.426069	0.0482665	0.393343	-0.121441	-0.0420986	0.304867	0.219919	-0.157992	0.242242	-0.346224	-0.120909	0.286908	-0.135888	-0.0559465
ENSMUSG00000018395	Kif3a	0.185588	0.416533	-0.256237	0.0493926	0.233196	0.00469497	-0.106294	-0.137815	-0.132452	0.146401	-0.114983	-0.186368	0.245601	0.194788	0.207075	0.365888	0.273621	-0.0689074	0.164863	-0.352483	0.11991	0.0638453	0.293252	0.1755	-0.243314	-0.373395
ENSMUSG00000018398	2019-09-08	-0.269788	0.00598815	-0.064511	0.164876	0.0276221	0.329019	-0.0197309	-0.22207	-0.0559975	-0.275058	0.00100074	-0.16946	-0.111208	0.0928811	0.00528616	-0.0248456	-0.475574	0.0959458	-0.356713	-0.00582432	-0.138802	0.357638	0.190711	-0.120587	-0.125238	-0.573754
ENSMUSG00000018415	Gid4	-0.55859	-0.409635	-0.285061	-0.121081	-0.150623	-0.383589	-0.355644	-0.455668	-0.0753865	0.136169	0.321456	-0.186549	0.0362169	-0.210028	-0.468339	0.227766	0.277115	-0.145948	-0.150296	0.324919	0.0270555	0.2644	0.0973675	0.0658944	0.155625	0.102988
ENSMUSG00000018417	Myo1b	0.358211	0.570058	0.224436	0.222196	0.199977	0.360798	0.376342	0.395937	0.292651	0.370034	0.289119	0.549567	0.642516	0.658739	0.575048	-0.476931	-0.384036	-0.56956	-0.375755	-0.417625	-0.469549	-0.249941	0.0160158	-0.0233816	-0.422599	0.0763285
ENSMUSG00000018425	Dhx40	0.333328	0.530034	0.0907884	0.338048	0.363468	-0.231887	0.112409	0.0140879	0.32939	0.231409	0.208089	0.197679	0.235381	0.288913	0.406055	0.0318392	0.25414	-0.132875	0.260606	-0.363048	-0.151197	0.0712812	0.179505	-0.110868	-0.1585	0.233005
ENSMUSG00000018427	Ypel2	0.0851312	0.288185	0.219083	0.193479	0.28726	-0.239872	0.0682774	-0.0914293	0.594376	0.319224	0.567269	0.412797	0.173042	0.314243	0.151284	-0.230224	0.0964791	-0.363544	-0.142261	-0.159458	-0.481616	0.044004	-0.095381	-0.38799	-0.229238	0.526568
ENSMUSG00000018446	C1qbp	0.0643572	-0.402524	0.319794	-0.118988	-0.0534778	0.153128	0.040654	0.0456098	-0.530811	0.0200761	-0.0939997	-0.203653	-0.167333	-0.607425	-0.407302	-0.0636021	0.0929603	0.3159	0.343273	0.312144	0.343261	-0.0357609	-0.284608	-0.0397288	-0.394213	-0.0744522
ENSMUSG00000018449	Rpain	0.0366684	0.30888	0.0143465	0.271291	0.137767	-0.142016	0.185837	0.0149297	0.532248	0.144699	0.370343	0.276814	0.325212	0.495817	0.301084	0.137426	0.0247738	-0.138003	-0.159072	-0.0405052	-0.0325482	0.0891838	0.277327	-0.0877314	0.438739	0.132715
ENSMUSG00000018470	Kcnab3	-0.16266	0.336656	-0.232426	0.189105	-0.116304	-0.0390969	-0.0547298	-0.0254184	0.0977359	0.244278	0.227028	0.266906	-0.00951043	0.50519	0.446255	0.0982697	-0.187133	-0.26207	-0.185975	-0.0215938	0.000987486	0.198166	0.49485	-0.23626	-0.0382616	-0.135935
ENSMUSG00000018474	Chd3	0.178993	0.26523	0.151697	0.134753	0.243107	0.457014	0.482827	0.337931	0.340868	0.443638	0.539752	0.46411	0.784404	0.60341	0.516867	-0.432549	-0.418885	-0.475014	-0.506808	-0.152669	-0.19191	0.0376517	0.0929995	0.034183	-0.381188	-0.112607
ENSMUSG00000018537	Pcgf2	0.246615	0.162116	0.0744189	-0.0602293	-0.213891	0.0383386	0.231466	0.534603	0.159073	0.325071	0.0254814	0.54315	0.0122137	0.329265	0.406147	-0.130262	-0.136378	-0.0911162	0.120473	0.185944	0.299449	-0.139781	0.204346	0.0820105	0.247624	0.366539
ENSMUSG00000018541	Cwc25	0.00813723	-0.236815	-0.116826	-0.136822	-0.187505	0.0096063	0.319706	0.13916	-0.324307	-0.0380346	-0.156634	-0.161985	-0.0742284	-0.058294	0.106742	0.122382	0.0129099	0.238251	0.132018	0.336779	0.490536	-0.16986	0.0689996	-0.00321678	0.249337	-0.205494
ENSMUSG00000018548	Trim37	0.31149	0.787036	-0.0360103	0.55091	0.273819	-0.00697003	0.0581125	-0.0852763	0.333098	0.1793	0.0282562	0.0742173	0.144162	0.617381	0.253327	0.216716	-0.0275511	-0.19841	-0.236254	-0.48819	-0.45833	-0.185582	0.152394	-0.256385	-0.0272702	0.0425905
ENSMUSG00000018599	Mief2	-0.225733	-0.328759	-0.231681	-0.516931	-0.324276	0.000436741	-0.417061	0.176129	0.0129193	-0.15539	-0.245276	0.153409	-0.208694	-0.244802	-0.139003	0.0744647	0.0740146	0.21739	0.187665	0.317068	0.238324	0.253701	0.0733552	0.48589	0.341579	0.213842
ENSMUSG00000018604	Tbx3	-0.262714	0.158866	-0.239221	-0.101201	-0.212065	0.283248	0.134189	-0.0907275	-0.0875862	-0.0840849	0.0639545	0.0833977	0.328185	0.299786	0.227644	0.0360213	-0.321012	0.131412	0.0961339	0.405153	0.114492	0.507705	0.708615	0.344215	0.293618	-0.359766
ENSMUSG00000018648	Dusp14	-0.469369	0.00117191	-0.256396	-0.160769	-0.342064	0.161835	0.210969	0.00797575	0.293083	-0.00109774	0.445499	0.500894	0.165549	0.535443	0.503698	-0.296675	-0.535667	-0.25537	-0.217239	0.399123	-0.000696463	0.573917	0.697704	0.0194345	0.231134	-0.125199
ENSMUSG00000018651	Tada2a	-0.131159	0.116557	0.148998	0.108909	0.0267245	-0.11726	0.069428	0.107187	0.192429	0.512457	0.627996	0.531903	0.417097	0.363337	0.261038	-0.315731	-0.0698384	-0.51774	-0.222829	0.0470049	-0.145386	0.0945692	0.180329	-0.114557	-0.198063	0.276442
ENSMUSG00000018654	Ikzf1	0.155736	0.00666836	0.0278645	0.0515815	0.23222	-0.326386	-0.201978	-0.28372	0.0629194	-0.450341	-0.335478	-0.389144	-0.410359	-0.40775	-0.292599	0.278034	0.548228	0.300975	0.469137	-0.34476	-0.0772792	-0.0787951	-0.281155	-0.05814	0.110406	0.118804
ENSMUSG00000018669	Cdk5rap3	-0.359007	-0.145741	-0.168534	-0.279147	-0.522227	-0.150411	-0.189935	0.0567226	0.145961	0.0376945	0.218804	0.488957	-0.13361	0.175215	0.0480948	-0.031699	-0.0874088	-0.127114	-0.0120626	0.422553	0.15901	0.225976	0.409442	0.121569	0.44413	0.366732
ENSMUSG00000018677	Slc25a39	-0.152787	-0.351095	0.185532	-0.371756	-0.451642	0.117125	0.0425576	0.45158	-0.196982	-0.0344885	0.0679281	0.520278	-0.0543729	-0.108808	0.217293	-0.555231	-0.380621	7.22343e-05	0.0368649	0.410457	0.162731	0.0145291	0.0239495	0.0828224	-0.0114263	0.246761
ENSMUSG00000018678	Sp2	0.0248293	-0.0799605	0.146757	0.0141885	0.0906905	0.191839	-0.269647	-0.253153	-0.234183	-0.215606	-0.227703	-0.32737	-0.277405	-0.489403	-0.499386	0.292208	0.270284	0.464327	0.422797	0.0734001	0.0910034	0.274035	-0.0929505	0.154408	-0.221829	-0.134911
ENSMUSG00000018697	Aatf	0.257825	0.301164	0.238408	0.321305	0.255285	-0.120353	-0.340082	-0.270889	-0.0150466	-0.00267543	-0.121031	-0.147102	-0.385172	-0.195753	-0.455314	0.246157	0.318316	0.159972	-0.0135395	-0.308225	-0.440654	-0.263524	-0.419715	-0.353435	-0.388746	0.339868
ENSMUSG00000018733	Pex12	0.0518355	0.152943	-0.292886	-0.143346	0.0577379	-0.316771	-0.499204	-0.310476	0.0198236	-0.0468081	-0.206597	-0.291782	0.109176	-0.0813746	-0.283069	0.453621	0.443446	0.0929471	-0.060852	-0.222486	-0.123367	-0.151174	-0.0321073	0.315544	0.254717	0.165951
ENSMUSG00000018750	Zbtb4	0.433906	0.4483	0.434395	0.429171	0.41232	0.230503	0.08312	-0.00548983	-0.0129819	0.123444	-0.00563725	-0.00295653	-0.0341914	0.0661728	-0.0714966	-0.0344149	-0.0536157	-0.0621911	-0.296569	-0.427496	-0.458383	-0.446542	-0.448266	-0.419386	-0.587838	0.0286517
ENSMUSG00000018761	Mpdu1	-0.217277	-0.16048	-0.367767	-0.103543	-0.209593	-0.133191	-0.258938	-0.449189	-0.276592	-0.422121	-0.411633	-0.529547	-0.583801	-0.319896	-0.432121	0.647635	0.272792	0.499161	0.201477	0.256604	0.330882	0.115533	0.205076	0.0854425	0.486554	-0.208845
ENSMUSG00000018820	Zfyve27	-0.424078	-0.218505	-0.306799	-0.253413	-0.311703	0.0692287	-0.177049	-0.327101	0.176423	-0.559553	-0.0887222	-0.091276	-0.424805	-0.0648632	-0.0912201	0.203347	-0.166917	0.432148	0.109271	0.38802	0.165328	0.635775	0.452376	0.147297	0.519154	-0.189354
ENSMUSG00000018830	Myh11	-0.0118918	0.0660834	-0.11039	-0.197062	-0.079742	0.690451	0.303579	0.342244	-0.14196	0.0524249	0.0477619	0.255604	0.505464	0.313657	0.385494	-0.349572	-0.573443	-0.123169	-0.206878	0.0931887	0.103005	0.301342	0.362157	0.396137	-0.278951	-0.47766
ENSMUSG00000018846	Pank3	0.10249	-0.0742072	-0.203644	-0.331094	-0.363005	-0.216653	-0.236999	0.056119	-0.413011	-0.0589612	-0.363705	-0.0775804	-0.415726	-0.309337	0.0278756	0.351018	0.308166	0.495976	0.581363	0.354107	0.622312	-0.00157145	0.280607	0.131439	0.241399	0.16244
ENSMUSG00000018848	Rars	0.211303	0.256956	0.155918	0.169429	-0.0629611	0.320233	0.471997	0.638466	0.125972	0.714473	0.352818	0.644133	0.676137	0.650148	0.475156	-0.492705	-0.511858	-0.678824	-0.459201	-0.012992	-0.106864	-0.298505	0.0743712	0.0735836	-0.222843	0.154493
ENSMUSG00000018849	Wwc1	0.397309	0.225729	0.222721	0.189496	0.402313	-0.127234	0.0427366	-0.0389823	0.290953	0.139835	0.0851373	-0.0516145	-0.0701185	0.0325406	0.00510402	0.174677	0.425953	-0.100549	-0.0345226	-0.470577	-0.0878897	-0.379801	-0.400104	-0.275667	-0.190268	0.189391
ENSMUSG00000018861	Fdxr	0.278625	0.00846604	0.29722	0.110295	0.397552	0.495079	0.300957	0.302387	0.279196	0.0482808	0.0385513	0.0030543	0.326689	0.0152011	0.16508	-0.131175	-0.100213	0.114324	-0.00032601	-0.165366	0.042261	0.12414	-0.246232	0.218801	-0.203507	-0.255487
ENSMUSG00000018906	P4ha2	0.00180542	-0.0911648	0.111522	-0.0670259	0.286944	0.176937	-0.108047	-0.308027	-0.190184	-0.49325	-0.217301	-0.469406	-0.102925	-0.479684	-0.250757	0.350452	0.292116	0.694778	0.455	0.0849011	0.284569	0.397997	0.053053	0.192773	0.0768566	-0.457568
ENSMUSG00000018927	Ccl6	0.402007	0.26453	0.423692	0.405971	0.203419	-0.0469812	0.154541	0.34973	0.016392	0.476291	0.115044	0.273349	0.0414817	0.188019	0.064936	-0.258395	0.0168764	-0.439707	-0.247223	-0.414458	-0.321973	-0.675165	-0.531949	-0.443997	-0.486027	0.358979
ENSMUSG00000018930	Ccl4	0.170381	0.226971	0.0773064	0.340943	0.116185	0.185708	0.103034	-0.148977	-0.0369254	-0.115515	-0.189307	-0.241178	-0.314418	0.0399548	-0.190249	0.343358	-0.0472882	0.415098	-0.108241	0.0775155	-0.0470303	-0.100738	-0.05118	-0.217939	0.10755	-0.086414
ENSMUSG00000018974	Sart3	0.484163	0.537786	0.18673	0.125663	0.124298	0.002325	0.138358	0.340608	0.0668419	0.233927	0.0042905	0.373181	0.173785	0.366587	0.515457	-0.0525271	0.0621983	-0.15074	-0.0580158	-0.332106	-0.104274	-0.507044	-0.0620757	-0.191089	-0.168437	0.241023
ENSMUSG00000018983	E2f2	0.00870674	0.0964741	-0.0318861	0.109378	-0.0602923	-0.220322	-0.0126412	0.0744246	0.473652	0.053116	0.147624	0.266362	-0.0784869	0.300979	0.200511	0.0677625	-0.0891745	-0.0309735	-0.341751	0.0353315	-0.0401544	-0.0742014	0.0845893	-0.0140931	0.539793	0.374884
ENSMUSG00000018999	Slc35b4	0.0363404	0.37111	-0.22123	0.0846784	-0.0437832	0.0630164	0.103423	-0.140661	-0.318174	0.128312	-0.0670934	-0.0904211	0.0472562	0.227272	0.338985	0.111585	-0.0772088	-0.0726294	0.213161	-0.032981	0.0881202	0.119985	0.478187	-0.0820959	-0.286981	-0.370689
ENSMUSG00000019088	Dnase1l1	0.257911	-0.00471423	0.181399	-0.166119	0.0319009	-0.0452286	0.145272	0.361381	0.250848	0.182834	0.192717	0.352153	0.346296	0.0368001	0.135635	-0.0712722	0.21199	0.0312677	0.238883	0.108355	0.269488	-0.0672496	-0.0211552	0.131851	0.226234	0.387248
ENSMUSG00000019139	Isyna1	0.116529	-0.0147492	-0.258076	-0.290041	0.0266906	0.396712	-0.259839	-0.0859729	-0.345555	-0.472872	-0.672071	-0.507876	-0.140388	-0.362975	-0.183682	0.395531	0.0866008	0.655931	0.337798	-0.0226868	0.329784	0.278094	0.152377	0.64452	0.0976331	-0.522383
ENSMUSG00000019143	Hars2	0.171124	0.255586	-0.103929	-0.0576365	0.118068	-0.300278	-0.118446	-0.0174254	0.475174	0.0692409	0.0281691	0.198322	-0.0720953	0.118684	0.154137	0.197838	0.385761	0.0564003	0.399107	-0.0805825	0.0202267	0.203018	0.186331	0.160842	0.259512	0.449282
ENSMUSG00000019194	Scn1b	-0.122562	0.235186	0.142093	0.208154	0.241556	0.198179	-0.115558	-0.213344	0.669575	-0.116304	0.395514	0.303691	0.0346131	0.276651	-0.0166349	0.0427878	-0.0326118	-0.0688359	-0.310722	-0.148873	-0.439495	0.400634	0.0640836	-0.0125958	0.0343235	0.148223
ENSMUSG00000019261	Map1s	0.0523504	0.0462327	-0.136319	-0.232145	-0.23607	-0.209017	-0.120139	0.0346482	-0.0907707	-0.121938	-0.155603	0.0954726	-0.168333	-0.135001	0.0979691	0.238986	0.214162	0.435522	0.592157	0.359845	0.45663	0.251329	0.440017	0.178415	0.411644	0.217772
ENSMUSG00000019297	Nop9	-0.0795246	0.299813	-0.191573	0.00188542	-0.111835	-0.134682	0.0395574	0.0765175	0.616577	0.0157973	0.14342	0.422826	0.0255891	0.565655	0.423809	-0.109213	-0.199869	-0.266388	-0.18878	-0.0505886	-0.312775	0.0958865	0.281108	0.00684352	0.433899	0.313538
ENSMUSG00000019338	Zfp687	0.0959534	0.191028	0.0302211	0.0498528	0.0184775	0.141414	0.267749	0.176862	-0.263915	0.130812	-0.0566193	-0.000535664	0.426514	0.20669	0.27473	-0.16538	-0.108017	-0.244921	0.0935463	-0.129983	-0.0456078	-0.214183	0.0650624	0.031882	-0.188441	-0.320884
ENSMUSG00000019362	D8Ertd738e	0.411486	0.240213	0.471397	0.130653	-0.0388779	0.244025	0.609017	0.584006	-0.0462835	0.123744	0.00100615	0.46202	0.0979929	0.28616	0.529779	-0.616417	-0.458224	-0.15317	0.0487125	-0.0362146	-0.13854	-0.469971	-0.196362	-0.389088	-0.284029	0.124302
ENSMUSG00000019433	Gipc1	0.237233	0.282528	0.32709	0.247755	-0.0937784	-0.133201	0.114352	0.325036	-0.16191	0.53696	0.233885	0.484149	0.171326	0.172682	0.238336	-0.26459	-0.0221167	-0.339363	0.168324	-0.00217461	-0.0605359	-0.276975	0.0214256	-0.253395	-0.40604	0.403554
ENSMUSG00000019467	Arhgef25	-0.428371	-0.0992969	0.103586	0.337976	0.323959	-0.0774772	-0.1671	-0.578734	0.274177	-0.220447	0.400698	-0.218078	-0.020978	-0.139841	-0.329829	0.235746	0.117731	0.221295	-0.0316999	0.120568	-0.161486	0.70825	0.166705	-0.0986565	0.083278	-0.234324
ENSMUSG00000019470	Xab2	-0.250997	-0.532034	0.0116162	-0.305956	-0.496183	-0.0479429	0.160049	0.183707	-0.167697	0.00177324	0.123674	0.243211	-0.440414	-0.192865	0.0229646	-0.167039	-0.194773	0.144972	0.0279952	0.674013	0.499146	0.0251726	0.0901396	-0.174329	0.265655	0.229331
ENSMUSG00000019478	Rab4a	0.176636	0.274399	-0.180608	-0.145945	0.0994354	0.0886642	0.200533	0.176101	0.464785	0.0323118	0.0738765	0.278496	0.149165	0.471139	0.50151	-0.150158	-0.0761484	-0.326379	-0.193844	-0.326665	-0.158158	-0.0963379	0.0699422	0.0191864	0.0364723	0.067631
ENSMUSG00000019494	Cops6	-0.133829	0.300822	-0.0699799	0.373876	-0.115565	-0.163468	-0.0235369	0.0976325	0.323969	0.612068	0.464352	0.513569	0.143487	0.629719	0.180579	-0.0158133	-0.131251	-0.675565	-0.460392	-0.0751461	-0.272584	-0.0879585	0.188451	-0.26198	-0.0601765	0.332877
ENSMUSG00000019518	Ap4m1	0.138047	-0.0641646	-0.334501	-0.319456	0.126338	0.0369449	-0.260867	-0.0251482	-0.332159	-0.0893714	-0.497325	-0.478844	0.0555582	-0.329619	-0.205183	0.419461	0.425614	0.310126	0.394676	-0.102787	0.393791	0.0518762	0.0153538	0.512067	0.0426581	-0.305185
ENSMUSG00000019528	Gyg	-0.0290296	-0.202216	0.196939	0.249956	0.387204	0.245274	-0.0165419	-0.232843	0.0690644	-0.252422	0.00327825	-0.391183	-0.0127386	-0.367772	-0.416743	0.239656	0.163704	0.369062	0.115402	-0.0712877	0.108409	0.423536	-0.150367	0.199552	-0.0856672	-0.36436
ENSMUSG00000019558	Slc6a8	0.537802	0.296687	0.23603	-0.0147775	0.0980782	-0.0656502	0.271881	0.346116	-0.206627	0.188863	-0.0852721	0.161399	0.0824396	0.0669977	0.437153	-0.08941	0.23777	-0.0708702	0.370149	-0.287045	0.281979	-0.499926	-0.0817211	-0.227523	-0.261984	0.0720331
ENSMUSG00000019578	Ubxn6	0.198116	-0.126829	0.0824216	-0.15967	-0.131068	0.0873137	-0.134688	0.179075	-0.302832	0.264153	-0.0441367	0.0987026	-0.10496	-0.264123	-0.277196	0.107927	0.220023	0.033605	0.0975457	0.111813	0.313473	-0.215445	-0.161719	0.0729363	-0.283472	0.258876
ENSMUSG00000019579	Mydgf	-0.117053	0.0653472	0.250417	0.349907	0.177292	0.0307491	0.473738	-0.00821966	0.181495	0.155807	0.601803	0.268632	0.276477	0.360211	0.351727	-0.352874	-0.326831	-0.319237	-0.424158	0.0282363	-0.198498	0.0173727	0.0539489	-0.514701	-0.178752	-0.102704
ENSMUSG00000019590	Cyb561	-0.127783	-0.176164	-0.253951	-0.443646	-0.163814	0.153613	-0.462524	-0.245854	-0.363478	-0.458515	-0.508914	-0.445327	-0.31424	-0.495571	-0.318223	0.342401	0.129917	0.617128	0.398898	0.20987	0.293626	0.334923	0.159592	0.346822	0.135878	-0.33124
ENSMUSG00000019647	Sema6a	0.037842	0.0535362	0.187568	0.205769	-0.149138	0.324946	0.42055	0.448878	0.0609965	0.349457	0.350174	0.540434	0.211448	0.414583	0.441771	-0.459348	-0.604867	-0.197816	-0.424247	0.238866	-0.00152639	0.00615438	0.158187	-0.109771	-0.149146	0.122942
ENSMUSG00000019659	Ccdc12	0.0250631	0.130754	-0.318545	-0.195415	-0.230583	0.0349705	0.169739	0.104448	-0.321192	-0.144706	-0.199917	0.0112845	-0.114564	0.170998	0.503694	-0.0638099	-0.095487	-0.133638	0.184638	-0.121989	0.235224	-0.113417	0.326995	-0.165266	-0.123977	-0.330668
ENSMUSG00000019689	Fmc1	-0.240662	0.109991	-0.372504	-0.160372	-0.188079	-0.0874872	-0.231551	-0.1049	0.223111	0.123658	0.118495	0.202157	0.233934	0.222621	0.0143816	0.28635	0.0948146	0.0950983	0.14171	0.364309	0.170006	0.559923	0.658944	0.607079	0.539157	0.199031
ENSMUSG00000019699	Akt3	0.0305917	-0.0454875	0.409892	0.398515	0.30372	0.266234	0.535988	0.257916	0.0086596	0.480472	0.505043	0.202769	0.44542	0.191662	0.120592	-0.33293	-0.260165	-0.314246	-0.222801	0.0995058	0.0162624	0.0160442	-0.134144	-0.294578	-0.414149	-0.197155
ENSMUSG00000019710	Mrpl24	0.0311352	0.203331	0.313451	0.231754	0.0499323	0.259582	0.5156	0.381829	0.344899	0.544033	0.585759	0.632015	0.558462	0.610681	0.451038	-0.548088	-0.522589	-0.434766	-0.405202	0.202718	-0.257309	0.00702011	0.112662	-0.117673	-0.107002	0.198505
ENSMUSG00000019718	L3hypdh	-0.0163464	0.0297515	0.0369988	-0.276857	-0.231792	-0.0544243	-0.270931	-0.147017	-0.271124	-0.330071	-0.292443	-0.0697376	-0.148679	-0.320032	-0.134181	0.0815265	0.139152	0.396207	0.488014	0.20337	0.0573528	0.101244	0.17872	0.27281	0.191154	0.0963211
ENSMUSG00000019731	Slc35e1	0.336611	0.22979	0.190192	0.0642748	0.187147	-0.104835	0.326406	0.190952	-0.125552	0.0571243	-0.0805763	0.0189118	-0.0559236	0.0774996	0.465749	-0.161255	0.0764078	-0.0628369	0.287163	-0.24465	0.0957203	-0.347031	-0.10986	-0.412909	-0.257907	-0.114434
ENSMUSG00000019738	Polr2i	-0.072208	0.157034	-0.303069	-0.117211	-0.290841	0.387804	-0.0314657	0.157885	-0.050641	0.0261522	-0.203154	0.0810574	0.0691288	0.289452	0.26967	0.0696783	-0.500108	0.0904352	-0.161466	0.219742	0.14119	0.240516	0.457954	0.287318	0.154137	-0.313421
ENSMUSG00000019761	Krt10	0.136206	0.332397	-0.479765	-0.239102	-0.192781	-0.00756458	-0.380755	-0.0330996	-0.0110179	-0.0961583	-0.479865	-0.142982	0.0416909	0.184937	0.112196	0.457669	0.133917	0.084856	0.0142456	-0.219085	0.121524	-0.0976514	0.339662	0.5747	0.430454	-0.074836
ENSMUSG00000019763	Rmnd1	0.439686	-0.0265858	0.313751	-0.0881665	-0.0329479	0.236615	0.323371	0.601997	-0.0120623	0.0754379	-0.224977	0.222533	-0.0192717	-0.0368991	0.232302	-0.348739	-0.119156	-0.0741737	0.183323	-0.162775	0.189152	-0.434366	-0.32905	0.0119881	-0.0863808	0.138653
ENSMUSG00000019772	Vip	0.0219075	-0.113886	0.399388	0.265304	0.213699	0.247982	0.354007	0.235911	0.262926	0.534312	0.713132	0.430961	0.393486	0.210248	0.0677858	-0.322071	-0.17693	-0.344977	-0.441635	0.114557	-0.0250454	0.0487646	-0.180032	-0.217837	-0.398756	0.164375
ENSMUSG00000019775	Rgs17	-0.194554	0.0304409	-0.27058	-0.299503	-0.526031	0.20559	0.0664075	0.0533617	-0.127882	-0.164836	-0.0968703	0.215814	-0.259099	0.159682	0.331833	-0.083879	-0.362492	0.182904	0.278865	0.456259	0.255952	0.359689	0.615836	0.0165871	0.188032	-0.0976779
ENSMUSG00000019777	Hdac2	-0.068955	0.113296	-0.335573	-0.244257	-0.00033461	-0.0268509	-0.041047	0.0590349	0.211183	-0.124415	-0.0784932	0.087107	0.229921	0.264798	0.221041	0.020182	0.0904719	-0.138353	0.0801533	-0.157897	-0.0924393	0.123697	0.170523	0.231889	0.166988	-0.076299
ENSMUSG00000019782	Rwdd1	0.0777372	-0.00244704	-0.189146	-0.357455	-0.425157	0.391432	0.302099	0.427119	-0.390806	-0.0102039	-0.272696	0.165339	0.161825	0.163931	0.466183	-0.199381	-0.521056	0.228982	0.0509982	0.448654	0.467309	0.00754181	0.474923	0.379655	0.262106	-0.2306
ENSMUSG00000019791	Hint3	0.152392	0.143859	-0.193651	0.145626	0.0621937	-0.0671973	0.0620059	-0.200831	-0.123328	-0.201384	-0.249957	-0.45272	-0.0408478	0.00720163	0.00226466	0.481195	0.14408	0.331478	0.00124496	-0.0794527	0.276672	-0.151994	0.145603	-0.0247057	0.377769	-0.315842
ENSMUSG00000019795	Pcmt1	0.419156	0.405759	-0.0162396	-0.11438	-0.133905	0.407716	0.345335	0.639727	-0.0573345	0.462886	-0.0151422	0.528602	0.397412	0.577649	0.682992	-0.288265	-0.384203	-0.275458	-0.250919	-0.0546332	0.10023	-0.368525	0.179891	0.17463	-0.209723	0.0670303
ENSMUSG00000019796	Lrp11	-0.277084	0.294913	-0.0559425	0.393602	-0.0563885	-0.211806	0.0767383	-0.281606	0.306935	0.0622431	0.41715	0.243321	-0.0283439	0.456478	0.222641	0.145015	-0.135267	0.00639615	-0.15975	0.254744	-0.144825	0.361012	0.548237	-0.237259	0.387664	0.122121
ENSMUSG00000019806	Aig1	0.507494	0.347921	0.122959	-0.140723	-0.0594294	0.394537	0.380603	0.738404	0.0176158	0.421551	-0.0377072	0.533406	0.459208	0.489651	0.670924	-0.416211	-0.40605	-0.23878	-0.153642	-0.103932	0.0868388	-0.387546	0.0326395	0.153344	-0.230691	0.0911659
ENSMUSG00000019813	Cep57l1	-0.0965789	0.170778	-0.310449	0.0162234	0.0711567	-0.142685	-0.157616	-0.262392	-0.247968	-0.0342665	-0.205358	-0.352803	0.179091	0.0164594	-0.00824879	0.454421	0.274214	0.0660844	0.170784	-0.0590792	0.195167	0.0978011	0.355909	0.347933	0.27012	-0.375554
ENSMUSG00000019814	Ltv1	0.680517	0.401177	0.0869695	0.065413	0.249325	-0.146652	0.143533	0.394608	0.0690103	0.511119	-0.0202406	0.188002	0.28281	0.153555	0.289378	0.112628	0.424547	-0.0444107	0.349644	-0.282372	0.282059	-0.356383	-0.0515413	0.0489196	-0.169881	0.4006
ENSMUSG00000019820	Utrn	-0.249301	0.377593	-0.260982	-0.0247345	-0.166186	0.197197	-0.219621	-0.220972	-0.0292527	-0.00448564	0.0904542	0.193255	0.0991098	0.386169	0.121432	0.0961542	-0.236418	-0.16051	-0.211726	0.0396271	-0.218022	0.304698	0.554753	0.107957	-0.0016355	-0.183678
ENSMUSG00000019822	Smpd2	0.475866	0.326443	0.21912	-0.0273595	0.179189	0.612884	0.574657	0.597264	0.0746397	0.281253	0.103114	0.414233	0.673269	0.425667	0.591025	-0.401498	-0.381209	-0.0254314	-0.0622469	-0.0212153	0.0765873	-0.0426918	0.118457	0.312959	-0.268025	-0.104628
ENSMUSG00000019823	Mical1	-0.0549385	-0.000330569	-0.398117	-0.110924	-0.313586	0.099207	-0.0532395	0.172168	-0.155074	0.278668	-0.120288	0.075727	-0.121159	0.272871	0.0735725	0.19932	-0.177882	-0.215801	-0.344198	0.093998	0.311805	-0.157344	0.236308	0.0873533	0.123805	-0.0867254
ENSMUSG00000019826	Zbtb24	0.389821	0.234699	0.292729	0.595043	0.297942	-0.269945	0.174349	0.08854	-0.0641569	0.584729	0.194099	-0.0234231	0.150575	0.091259	-0.122303	0.054122	0.198504	-0.266213	-0.221197	-0.273701	-0.131843	-0.551474	-0.364022	-0.357097	-0.319803	0.344661
ENSMUSG00000019831	Wasf1	0.084285	0.568236	-0.179821	0.0353458	0.196075	-0.0427901	-0.44594	-0.338442	0.433719	-0.0788809	0.0721598	0.0910162	0.182128	0.258326	-0.0187841	0.375164	0.267269	0.122964	0.0178188	-0.255079	-0.342933	0.338621	0.340643	0.246478	0.142663	0.208526
ENSMUSG00000019841	Rev3l	-0.453051	-0.350318	-0.203761	0.0573763	-0.258883	-0.374525	-0.183825	-0.236293	-0.0884176	0.314532	0.334711	0.0165886	-0.163902	-0.105665	-0.275735	0.11664	0.0363184	-0.0434456	-0.0723086	0.526554	0.165843	0.33766	0.23539	-0.0868283	0.106054	0.254783
ENSMUSG00000019849	Prep	0.181219	0.0318377	0.086389	-0.258576	0.0619559	0.472768	-0.136806	0.11814	-0.0928735	-0.298553	-0.280668	-0.0250105	0.00894225	-0.286322	-0.0878265	0.13081	0.0368156	0.620634	0.378803	0.170046	0.209757	0.362923	0.0842851	0.430628	-0.0507747	-0.127294
ENSMUSG00000019852	Arfgef3	-0.0435784	0.297684	-0.463352	0.0748819	0.101712	-0.111557	-0.592576	-0.310322	0.0674949	-0.0413659	-0.295606	-0.293644	-0.179329	0.076586	-0.215451	0.711937	0.385415	0.0785198	-0.0604831	-0.332089	-0.0505447	0.123611	0.154288	0.213453	0.0948945	-0.143498
ENSMUSG00000019854	Reps1	0.00312473	0.386123	0.0416606	0.470811	0.424198	-0.272977	-0.107239	-0.572054	0.15606	0.0646787	0.236791	-0.266316	0.0731879	0.0103671	-0.253248	0.421004	0.446169	0.126245	0.292338	-0.124353	-0.254432	0.338748	0.181096	-0.208994	-0.122327	0.00770506
ENSMUSG00000019857	Asf1a	0.616616	0.505424	-0.0402689	0.126015	0.354326	0.231406	0.200647	0.1805	0.136192	0.114005	-0.267177	-0.107369	0.157551	0.27382	0.272618	0.178359	0.124278	-0.0493864	-0.0897771	-0.567318	0.00857637	-0.394363	-0.0954879	0.14086	-0.110034	-0.0885705
ENSMUSG00000019861	Gopc	0.610151	0.397765	0.416409	0.0758751	0.293707	0.312524	0.473429	0.46087	-0.0470151	-0.0351239	-0.125191	0.176595	0.266958	0.120534	0.612646	-0.279042	-0.140116	0.263831	0.309656	-0.187616	0.128942	-0.231469	-0.0476665	-0.109732	-0.207322	-0.132313
ENSMUSG00000019863	Qrsl1	-0.180924	0.110407	-0.237153	-0.102283	-0.0465181	-0.313579	-0.270267	-0.0503681	0.145144	0.261359	0.207251	0.16874	0.476297	0.202051	0.0714177	0.228209	0.256838	-0.141756	0.0579923	0.120209	0.0918991	0.221815	0.389008	0.411779	0.395817	0.168599
ENSMUSG00000019868	Vta1	0.120699	-0.0249607	0.225707	0.0684636	0.219852	0.173258	-0.017271	-0.0746837	0.249539	-0.321506	-0.0903155	-0.0829853	-0.166026	-0.303779	-0.197033	0.175645	0.146317	0.687618	0.428018	0.213328	0.143538	0.512403	0.0683476	0.320755	0.267404	0.110033
ENSMUSG00000019874	Fabp7	0.472941	0.177106	0.419634	0.172309	0.21353	0.383543	0.0632014	0.189804	-0.0862066	0.0703233	-0.103918	0.00745431	0.0267147	-0.222809	-0.147775	0.080106	0.0656814	0.376743	0.144781	-0.0341422	0.0855355	-0.117799	-0.240849	0.0659541	-0.289975	0.111612
ENSMUSG00000019876	Pkib	0.394941	0.0415598	0.251697	0.143299	0.322657	-0.0386691	0.101515	0.303995	-0.1148	0.327511	-0.0964605	-0.0159377	0.142197	-0.196828	-0.065443	0.0240296	0.402595	-0.122327	0.360123	-0.296762	0.190197	-0.254438	-0.33184	0.120786	-0.340791	0.113037
ENSMUSG00000019878	Hsf2	0.0264462	-0.0260784	-0.0672144	-0.100343	0.176992	-0.123125	0.0635976	-0.0995677	0.0821476	0.106203	0.178138	-0.116003	0.444106	-0.0405509	0.000518953	0.164539	0.384925	-0.0895507	0.270359	-0.060957	0.227401	0.12784	0.124525	0.238283	0.0954798	-0.0989294
ENSMUSG00000019883	Echdc1	0.676814	0.180286	0.458309	0.053952	0.301894	0.39795	0.508619	0.368539	-0.12758	0.00618801	-0.0797246	0.019916	0.174938	-0.120888	0.208801	-0.132984	0.00229872	0.460909	0.261644	-0.0104116	0.331483	-0.243897	-0.176332	-0.041674	-0.19484	0.00285374
ENSMUSG00000019894	Slc6a15	0.0201156	0.353472	-0.10679	0.141484	0.0394938	0.033964	0.231354	0.0595141	0.0422483	0.39423	0.230631	0.214369	0.258747	0.471785	0.362768	-0.0765256	-0.0851507	-0.416367	0.0118518	-0.0593716	-0.141036	-0.00973343	0.238079	-0.268473	-0.314807	-0.106129
ENSMUSG00000019897	Ccdc59	0.460779	0.462184	-0.0293412	-0.0932303	0.138389	-0.0518377	-0.0689523	0.246767	-0.0124072	0.321327	-0.0584783	0.132785	0.567441	0.232961	0.284956	0.0447429	0.192618	-0.0993295	0.0796348	-0.295822	0.0137721	-0.315364	0.0719239	0.207741	-0.0540739	0.177294
ENSMUSG00000019899	Lama2	0.068233	0.283625	0.143542	0.22319	0.0732084	-0.153617	-0.0253046	-0.262275	0.0531768	0.0694396	0.255768	0.068577	0.197596	0.0582053	-0.0769405	0.0297845	0.109134	0.0942129	0.16354	0.0453993	-0.179511	0.188946	0.247037	-0.0435011	-0.0314437	0.242447
ENSMUSG00000019907	Ppp1r12a	-0.164136	-0.086719	0.224769	0.343687	0.154475	-0.442734	-0.183924	-0.30992	0.240111	0.252372	0.46758	0.0371292	0.075891	-0.163665	-0.468351	0.210565	0.374382	0.143163	0.116502	0.302724	-0.0823441	0.298179	-0.00043955	-0.0949761	0.204018	0.522506
ENSMUSG00000019917	2019-09-10	0.404782	0.199156	0.164091	0.151311	0.242251	0.418042	0.433367	0.313546	0.27593	0.1008	-0.0715218	-0.00996929	0.470496	0.247167	0.151397	-0.133728	-0.267789	-0.0226997	-0.160128	-0.183184	-0.0579803	-0.158335	-0.13236	0.254384	0.071668	-0.134928
ENSMUSG00000019923	Zwint	0.0253361	0.241627	-0.0703735	0.213214	0.129083	0.248053	0.167085	-0.118472	0.199702	0.00381714	0.223778	0.0385611	0.179008	0.344732	0.192611	0.0149195	-0.228109	-0.049063	-0.460917	-0.115113	-0.196442	0.0789225	0.161238	-0.0696794	-0.0535503	-0.133034
ENSMUSG00000019927	Ube2d1	0.523325	0.387673	0.0636103	-0.195138	-0.0719817	0.239366	0.236654	0.497408	-0.169591	-0.0917172	-0.391505	0.20791	0.158765	0.199862	0.514944	-0.24661	-0.17383	0.126691	0.235906	-0.195451	0.00407348	-0.42692	-0.0236277	0.00893334	-0.117119	0.0188951
ENSMUSG00000019929	Dcn	-0.159544	0.0496141	0.338308	0.516192	0.203721	0.0975112	0.198381	-0.369332	0.178483	-0.268221	0.176759	-0.212928	-0.0999423	-0.00919547	-0.291433	0.0363697	-0.242707	0.280566	-0.187362	0.160038	-0.347233	0.202793	-0.0526965	-0.322198	0.195061	-0.154953
ENSMUSG00000019944	Rhobtb1	-0.283599	-0.161143	-0.322457	-0.433107	-0.489846	-0.0546116	-0.250944	0.0789384	-0.44598	-0.14455	-0.305374	0.102731	-0.202987	-0.108128	0.0859385	-0.151097	-0.177891	0.0388145	0.231525	0.297444	0.0960344	0.132688	0.294593	0.254198	0.00193604	-0.0260222
ENSMUSG00000019948	Actr6	0.0923643	-0.0443565	0.209616	-0.270348	-0.210361	0.55351	0.163748	0.530978	-0.236379	0.268844	0.0581201	0.473535	0.322085	0.109057	0.216069	-0.422395	-0.369546	-0.242826	-0.0680279	0.144423	0.110389	-0.0852958	-0.0156609	0.225525	-0.434055	-0.0860953
ENSMUSG00000019952	Poc1b	0.106229	-0.0066996	0.359675	0.165532	0.195662	0.101375	0.195426	-0.0572006	0.22776	-0.00227174	0.299994	0.130317	-0.176035	-0.105835	0.0341792	-0.271519	-0.112692	0.0943111	0.089506	0.036306	-0.116462	0.218079	-0.118377	-0.383039	-0.354695	0.149213
ENSMUSG00000019961	Tmpo	0.0404038	-0.372498	-0.0134747	-0.393898	-0.333215	0.123427	-0.0874828	0.192817	-0.428509	0.00699922	-0.284485	-0.0432485	-0.420593	-0.391304	-0.221259	0.0478716	0.0985098	0.112548	0.190696	0.234148	0.443101	-0.264416	-0.211139	0.0170258	-0.143215	0.0336455
ENSMUSG00000019969	Psen1	0.402574	0.0254629	0.353746	0.0990767	0.243269	0.710063	0.434648	0.427607	0.0248718	0.0215501	-0.0525654	0.0958003	0.251528	-0.0473543	0.118655	-0.210958	-0.224606	0.233237	0.0784064	-0.0299695	0.145424	0.0838899	-0.174486	0.264989	-0.347972	-0.191896
ENSMUSG00000019975	Ikbip	0.360554	0.227026	0.491485	0.310739	0.278117	-0.323547	0.0648529	0.101143	0.143263	0.301924	0.208254	0.143312	0.257873	-0.0784606	-0.0295833	-0.0891672	0.302119	0.0864025	0.368741	-0.0597483	-0.126833	-0.161315	-0.219581	-0.180925	-0.0842238	0.491052
ENSMUSG00000019977	Hbs1l	0.104779	0.401273	-0.15279	0.041361	0.311862	0.213748	-0.0468142	-0.261883	0.242103	-0.198442	0.0205588	-0.0999233	0.0446867	0.207642	0.270899	0.252975	0.0786787	0.27148	0.0621407	-0.204929	-0.0880194	0.409628	0.307418	0.0499424	-0.128291	-0.297269
ENSMUSG00000019978	Epb41l2	0.122593	-0.376432	0.0932859	-0.197916	0.122963	-0.358058	-0.300329	-0.105713	-0.193125	-0.396916	-0.408816	-0.448203	-0.441599	-0.756067	-0.486533	0.272642	0.624596	0.60782	0.586283	0.00538178	0.306258	-0.0720908	-0.41007	0.083262	0.230566	0.207894
ENSMUSG00000019979	Apaf1	0.384125	0.392254	0.410697	0.409606	0.591324	-0.250987	0.0127207	-0.11046	0.551426	0.34373	0.434893	0.187194	0.329072	0.0849546	-0.166032	0.201347	0.600594	0.00828058	0.189319	-0.246228	-0.271085	0.0172318	-0.22162	-0.0729716	-0.0985353	0.583271
ENSMUSG00000019984	Med23	-0.267316	0.0227766	-0.192904	-0.0280193	-0.00318624	-0.442486	-0.0721295	-0.33528	0.319402	-0.204592	0.315921	0.0535268	0.00770644	0.126283	0.156707	0.0774073	0.241715	0.0147408	0.217125	0.0373704	-0.0111747	0.390699	0.37271	-0.173734	0.345885	0.113451
ENSMUSG00000019986	Ahi1	0.0600501	0.277639	-0.0297033	0.0501067	-0.0268131	0.578927	0.172844	0.327734	0.214455	0.34362	0.177138	0.432973	0.3433	0.551875	0.302835	-0.164594	-0.433645	-0.456361	-0.485587	-0.122255	-0.0996295	0.0292006	0.198133	0.235891	-0.184643	-0.156045
ENSMUSG00000019997	Ctgf	-0.338038	0.0599051	-0.387571	-0.358084	-0.215604	-0.0997412	-0.467754	-0.226132	0.0906479	-0.0497221	0.116343	0.221094	0.0750027	0.0946684	0.0515888	0.0812974	0.0261288	-0.00835778	0.0404258	0.17209	-0.0572674	0.559053	0.524755	0.390308	0.0840439	0.117106
ENSMUSG00000020003	Pex7	0.0633473	-0.0289363	-0.152115	-0.0776518	-0.0947908	0.0561304	-0.16526	0.0658182	-0.213431	-0.434993	-0.551864	-0.242033	-0.513516	-0.236725	0.0504912	0.167339	-0.0190538	0.365425	0.231644	-0.123466	0.208238	0.00116952	0.0122171	0.036658	0.131204	-0.230277
ENSMUSG00000020014	Cfap54	-0.263714	-0.0712946	-0.23838	0.112485	-0.22831	-0.258186	-0.413182	-0.16451	-0.245466	0.180328	-0.1962	-0.178416	-0.124833	-0.115052	-0.339329	0.361522	0.0754332	0.0249952	-0.0574744	0.218291	0.0748213	0.0617266	0.190934	0.372497	0.325825	0.0848633
ENSMUSG00000020015	Cdk17	-0.298931	-0.371795	0.214761	-0.0913328	-0.235188	0.347124	-0.18215	0.0122792	-0.29824	0.00111249	0.0915004	0.12282	-0.167863	-0.348012	-0.395959	-0.124437	-0.219154	0.123256	-0.0229597	0.423005	0.0920231	0.30995	-0.0316404	0.136865	-0.278752	-0.0551694
ENSMUSG00000020017	Hal	0.556271	0.0602817	0.553483	0.456907	0.554435	0.081114	0.323212	0.333262	0.211251	0.389397	0.183418	0.0231035	0.167799	-0.0638754	-0.103408	0.00744478	0.230755	0.038389	-0.163681	-0.267163	0.0559377	-0.441583	-0.639271	-0.241334	-0.252963	0.252791
ENSMUSG00000020022	Ndufa12	-0.0336322	-0.0464637	-0.219005	-0.228423	-0.538336	0.142743	0.349046	0.503499	-0.430545	0.347358	0.0278441	0.396516	0.145954	0.360217	0.604017	-0.282991	-0.452314	-0.339738	-0.0887363	0.311615	0.475586	-0.224529	0.415385	-0.0451823	-0.0606057	-0.165807
ENSMUSG00000020024	Cep83	0.254198	0.525687	-0.0541316	0.409489	0.255281	-0.351546	-0.0218689	-0.0713119	0.407463	0.141231	0.0357709	0.053668	0.180554	0.393053	0.250901	0.293402	0.253993	-0.122521	-0.0303218	-0.399437	-0.20475	-0.134061	0.142772	0.0509643	0.3074	0.232157
ENSMUSG00000020029	Nudt4	0.279582	0.549806	-0.0523796	0.0872823	0.146744	0.0566041	0.102112	-0.0573352	0.133573	-0.0755049	0.0806194	0.167107	0.212951	0.322455	0.455208	0.101296	0.0311356	0.186259	0.181018	-0.153719	-0.00397272	0.197757	0.458795	0.00830327	-0.036129	-0.0220507
ENSMUSG00000020032	Nuak1	0.513935	0.651991	0.183084	0.289793	0.233587	0.15603	0.297525	0.284435	-0.10746	0.465312	0.035771	0.220708	0.422629	0.386353	0.463647	-0.18749	-0.111393	-0.281801	0.0954047	-0.321042	-0.182604	-0.306715	0.0820522	-0.174729	-0.528368	0.0097363
ENSMUSG00000020044	Timp3	-0.194005	-0.0703673	-0.389923	-0.539318	-0.255471	0.34862	-0.253186	-0.0386471	-0.230748	-0.152184	-0.215461	-0.058814	0.128727	-0.0346507	0.0775009	0.0163954	-0.272033	0.200849	-0.0394268	0.261277	0.173634	0.379712	0.406224	0.527949	0.0275003	-0.331742
ENSMUSG00000020048	Hsp90b1	0.171892	0.173923	-0.220611	0.0178011	0.0459182	-0.136119	-0.394251	-0.129473	-0.538225	0.0428555	-0.542729	-0.459746	-0.252328	-0.265416	-0.266365	0.513412	0.382516	0.122601	0.204391	-0.2522	0.179592	-0.319491	-0.0748183	0.0898062	-0.13928	-0.207543
ENSMUSG00000020053	Igf1	-0.225878	-0.0985798	-0.0715751	0.0362257	-0.206834	-0.199066	-0.0409826	-0.106432	-0.293845	0.153551	0.0777985	-0.00482927	0.013629	-0.0551286	-0.107834	0.183562	0.0577319	0.0347009	-0.0159647	0.396854	0.232116	-0.00715426	0.264136	0.132214	0.318644	0.0713645
ENSMUSG00000020056	Washc3	0.182017	0.13232	0.453963	0.280228	0.503762	0.290556	0.26762	0.148794	0.614325	0.132156	0.391569	0.289579	0.446508	0.134543	-0.0108419	-0.171047	0.0565964	0.019093	0.0736284	-0.0841982	-0.23543	0.377219	-0.143441	0.230207	-0.0848286	0.170017
ENSMUSG00000020057	Dram1	-0.104422	-0.410537	0.404394	-0.0849832	-0.150856	-0.157336	0.0694007	0.287612	0.109379	0.158559	0.383903	0.478007	-0.00928829	-0.188626	-0.119788	-0.385925	0.017671	-0.0491633	-0.00557051	0.367984	0.00504357	-0.0714485	-0.327072	-0.151574	-0.0131751	0.595342
ENSMUSG00000020061	Mybpc1	0.30685	0.0860834	0.406735	0.487141	0.377737	0.0080392	0.543643	0.138744	0.134117	0.352657	0.295984	0.0141294	0.101869	0.0846813	0.203218	-0.0949048	0.0327383	-0.127215	0.00606105	-0.105153	0.104155	-0.195368	-0.212847	-0.354296	-0.244191	-0.0100019
ENSMUSG00000020063	Sirt1	0.136557	0.0723075	-0.081397	-0.239825	-0.372297	0.155912	0.218025	0.378404	-0.0208163	-0.173345	-0.265961	0.263762	-0.118493	0.258231	0.473432	-0.276161	-0.428533	0.00126943	-0.158709	0.056376	0.0859962	-0.325678	0.127504	0.0814537	0.347423	0.0685662
ENSMUSG00000020070	Rufy2	0.26533	0.38805	0.180345	0.485351	0.534496	-0.0460724	0.351471	0.0649484	0.226622	0.333548	0.306862	0.0351137	0.465742	0.383305	0.387798	-0.0688509	0.118808	-0.448521	-0.185804	-0.550712	-0.211855	-0.220638	-0.112527	-0.22438	-0.315537	-0.172432
ENSMUSG00000020072	Pbld2	0.1689	0.350407	-0.0671507	0.0921692	0.264622	0.0282494	0.11673	0.124458	0.191857	0.34528	0.155223	0.0867865	0.695739	0.397706	0.258516	0.00895668	0.106058	-0.361464	-0.0236715	-0.307469	-0.0540943	-0.0162701	0.182635	0.292268	0.0270111	-0.119368
ENSMUSG00000020074	Ccar1	0.394454	0.516089	0.257839	0.128554	0.246378	0.162499	0.165721	0.374604	0.455546	0.540161	0.366877	0.618785	0.552891	0.53399	0.40353	-0.40803	-0.187924	-0.483932	-0.296442	-0.301293	-0.448293	-0.192847	-0.0776154	-0.00737474	-0.364196	0.448827
ENSMUSG00000020079	Supv3l1	-0.249419	-0.286327	-0.194255	-0.202156	-0.101738	-0.0696481	-0.0752916	-0.164833	0.236199	-0.239014	0.0620187	-0.0413884	-0.163762	-0.175825	-0.0881983	0.156359	0.0927377	0.452297	0.289801	0.438525	0.335709	0.665722	0.380014	0.384346	0.517563	0.108952
ENSMUSG00000020085	Aifm2	-0.183859	-0.22941	-0.289829	-0.169782	-0.065433	-0.260879	-0.2764	-0.160678	0.126268	-0.333161	-0.203419	-0.246048	-0.0524003	-0.169091	-0.251989	0.230906	0.220453	0.248609	-0.00920589	0.025143	0.0464997	0.121921	0.0204126	0.392328	0.613747	0.118703
ENSMUSG00000020087	Tysnd1	0.380593	0.110781	0.360546	0.126825	0.231646	0.0195176	0.29245	0.126282	0.0440114	-0.165635	-0.162994	-0.0814794	-0.225271	-0.143015	0.0456352	-0.171913	0.0989874	0.114705	0.28884	-0.242951	-0.177839	-0.384364	-0.482692	-0.506858	-0.270886	0.0806036
ENSMUSG00000020088	Sar1a	0.39184	0.495985	0.0872256	0.174943	0.0326696	-0.0105151	-0.0763914	0.154229	0.174142	0.386568	0.0745212	0.333216	0.112171	0.272365	0.0401603	0.212186	0.194576	-0.0852722	0.0647561	-0.116651	-0.0324927	-0.190423	0.105441	-0.00566055	-0.0449388	0.459613
ENSMUSG00000020089	Ppa1	0.379407	0.369601	0.561353	0.445103	0.341423	0.058476	0.308303	0.23583	0.114579	0.692144	0.536841	0.455108	0.466737	0.255125	0.115827	-0.308593	-0.0309959	-0.337961	-0.182982	-0.0773687	-0.270574	-0.251154	-0.189183	-0.26579	-0.53276	0.43711
ENSMUSG00000020091	Eif4ebp2	0.399161	0.456342	-0.0253158	0.0997936	0.315338	0.50687	0.204372	-0.01145	0.0727312	-0.287109	-0.321838	-0.274075	0.265979	0.240048	0.189089	0.0930295	-0.142538	0.120872	-0.117493	-0.521351	-0.191969	-0.118278	-0.00763104	0.186296	-0.125464	-0.514596
ENSMUSG00000020097	Sgpl1	0.615129	0.245904	0.629232	0.37462	0.435464	-0.196338	0.0751329	0.143828	0.0526376	0.132568	-0.0919997	-0.0299187	-0.152495	-0.265645	-0.190127	-0.125928	0.361358	0.0105045	0.29559	-0.481546	-0.298393	-0.587164	-0.730347	-0.47324	-0.46357	0.437805
ENSMUSG00000020099	Unc5b	0.0200743	0.044928	0.082285	-0.155412	-0.103851	0.187879	0.10483	0.26074	-0.049436	0.0115302	0.174265	0.310474	0.430662	0.191957	0.389658	-0.446031	-0.365046	-0.200971	-0.154749	-0.0771038	-0.0357622	0.0242631	0.144779	0.0438877	-0.187279	-0.126977
ENSMUSG00000020102	Slc16a7	-0.0357879	0.481999	-0.0562935	0.213929	-0.0140745	0.123256	0.384748	0.0244407	0.237054	0.238873	0.368699	0.389251	0.267816	0.702565	0.624119	-0.122068	-0.357231	-0.195205	-0.119106	0.144125	-0.092006	0.238135	0.604262	-0.190244	0.0728155	-0.111433
ENSMUSG00000020107	Anapc16	0.336213	0.66483	0.255245	0.75106	0.380268	-0.08749	0.37006	0.0484506	0.373137	0.484816	0.372246	0.239509	0.358564	0.611012	0.312325	-0.0582123	-0.0751808	-0.354192	-0.205407	-0.333548	-0.450654	-0.193811	0.040281	-0.402673	-0.195002	0.212067
ENSMUSG00000020109	Dnajb12	-0.0265982	0.0903416	-0.254407	-0.187351	-0.283995	0.305217	0.220006	0.313666	-0.128936	-0.113266	-0.194951	0.204496	-0.0557469	0.315061	0.572393	-0.0302313	-0.401802	0.0765656	-0.0462224	0.173527	0.326639	0.077119	0.422754	0.105687	0.160854	-0.355534
ENSMUSG00000020111	Micu1	-0.219295	-0.226507	0.0103816	-0.246096	-0.322438	0.316488	0.237806	0.171727	-0.273898	-0.0246004	-0.0282018	0.0525123	0.236134	0.0333901	0.176442	-0.437224	-0.582143	-0.120099	-0.140159	0.330175	0.0280356	0.023452	0.136202	0.15476	0.0124105	-0.320313
ENSMUSG00000020114	Cand1	-0.0553521	-0.311503	-0.0824416	-0.415429	-0.326668	0.00959398	-0.0400852	0.0108967	-0.211229	-0.213703	-0.277309	-0.051774	-0.431254	-0.32839	-0.236997	-0.017376	0.120212	0.21943	0.346251	0.303232	0.209329	-0.0501468	-0.0726873	0.12762	0.122845	0.189878
ENSMUSG00000020116	Pno1	0.208222	0.0984604	-0.0256522	-0.0988234	-0.0237019	0.271105	-0.0950577	0.0210322	-0.0857014	-0.259722	-0.395973	-0.16041	-0.267601	-0.234653	-0.0137266	0.15803	0.0294001	0.510278	0.473704	0.0510511	0.150648	0.261635	0.106503	0.240305	-0.0748769	-0.0936455
ENSMUSG00000020122	Egfr	-0.0437601	0.077154	-0.0390059	0.0976059	0.197943	0.257763	0.244034	-0.118792	0.105948	-0.0946272	0.164266	-0.129695	0.158311	0.136913	0.181185	-0.0839294	-0.183326	0.0983276	-0.0247438	0.0040545	-0.0815565	0.315262	0.131185	-0.208812	-0.196664	-0.364018
ENSMUSG00000020130	Tbc1d15	-0.323783	-0.235986	0.0107253	0.0622831	-0.0842966	-0.203421	0.00734899	-0.107785	0.388779	0.0338326	0.333492	0.172258	0.00932858	0.0696222	-0.168089	-0.0569988	-0.0401322	-0.00651918	-0.165139	0.346645	-0.0647017	0.292606	0.117615	0.135629	0.537078	0.363299
ENSMUSG00000020133	2310011J03Rik	0.0511284	-0.239644	0.609181	0.0369721	-0.151087	0.229659	0.506771	0.442557	-0.0332233	0.180915	0.405864	0.547142	0.0168104	0.00149546	0.209215	-0.719442	-0.493846	-0.0757079	-0.044501	0.401376	0.0554435	-0.0863849	-0.174449	-0.417108	-0.264487	0.244816
ENSMUSG00000020135	Apc2	0.144092	0.511187	0.156121	0.585251	0.363207	-0.258665	0.23227	-0.286925	0.287956	0.233328	0.39582	0.0223534	0.179289	0.399523	0.20895	0.179199	0.0842832	0.0215648	-0.0641642	-0.0758439	-0.210471	0.0853992	0.246376	-0.405787	0.0488213	0.0835166
ENSMUSG00000020142	Slc1a4	0.205198	0.697585	-0.0823164	0.463513	0.42137	0.0520364	-0.154357	-0.256195	0.213053	0.325288	0.215786	0.0305188	0.250843	0.462093	0.133714	0.428776	0.208128	-0.171914	-0.292225	-0.448305	-0.264247	0.0723417	0.247075	-0.0297657	-0.280923	-0.0855668
ENSMUSG00000020156	Mum1	0.691333	0.427188	0.532928	0.516996	0.792768	0.0865562	0.218287	0.159212	0.356653	0.357089	0.106348	-0.0845399	0.45835	0.0578192	-0.106135	0.10077	0.346695	0.0497124	-0.0247815	-0.517328	-0.23416	-0.333101	-0.538415	-0.0203837	-0.268592	0.19436
ENSMUSG00000020164	Kcnmb4os1	0.230992	0.158507	-0.200542	-0.225342	-0.00337799	0.25946	-0.27831	-0.00223505	-0.274317	-0.18302	-0.436486	-0.286117	0.0695251	-0.15749	-0.0279453	0.44059	0.182066	0.429824	0.209798	-0.101395	0.367505	0.0488911	0.18975	0.472586	0.075389	-0.339058
ENSMUSG00000020166	Cnot2	0.706199	0.225685	0.717971	0.276499	0.45377	0.360501	0.50735	0.619437	0.10907	0.237701	0.0415896	0.322193	0.343808	0.0019789	0.239362	-0.477793	-0.0901068	-0.0073574	0.133459	-0.317693	-0.0916791	-0.36923	-0.510872	-0.0317764	-0.49998	0.207723
ENSMUSG00000020171	Yeats4	0.320344	0.0148014	0.108588	-0.32553	-0.21911	0.153278	0.241888	0.394299	-0.481883	-0.225723	-0.456216	0.0452018	-0.118362	-0.213615	0.369751	-0.142667	-0.0742805	0.477805	0.649654	0.246639	0.487127	-0.128546	0.151371	0.148158	0.0389008	-0.11727
ENSMUSG00000020176	Grb10	0.0696344	0.246223	0.0479213	0.212646	0.363075	0.38571	0.161248	-0.0363364	0.618697	-0.14378	0.157547	-0.015134	0.440915	0.348288	0.121783	0.098323	-0.158047	0.0460809	-0.251577	-0.233072	-0.205967	0.330301	0.0916057	0.235299	0.242906	-0.301126
ENSMUSG00000020182	Ddc	-0.305771	0.169696	-0.571888	-0.135432	-0.193966	-0.196961	-0.070013	-0.271413	-0.0462326	0.0987784	0.134494	-0.0236898	0.10358	0.330377	0.374851	0.249407	0.0260735	-0.163834	0.0444173	0.141877	0.210305	0.346454	0.723444	0.0670901	0.205337	-0.245164
ENSMUSG00000020183	Cpm	0.0631784	-0.0775883	0.245589	0.0807321	-0.1052	-0.0444721	0.140425	0.309646	0.316391	0.116891	0.152934	0.409828	-0.148147	0.0605336	0.0874911	-0.130104	-0.0914534	0.17689	0.0460875	0.344808	0.149377	0.0706148	0.0316626	0.0570512	0.432823	0.52731
ENSMUSG00000020184	Mdm2	-0.326092	0.06854	-0.233267	0.0762457	0.0143006	-0.381468	-0.362167	-0.490684	0.439886	-0.237699	0.0826128	-0.0843807	-0.354811	0.0779282	-0.284999	0.365126	0.282523	0.0135049	0.0185574	-0.04542	-0.241408	0.316477	0.164549	-0.125054	0.438852	0.182573
ENSMUSG00000020186	Csrp2	0.137191	-0.050204	0.27295	-0.0182327	-0.13817	0.695608	0.438032	0.518239	-0.351237	0.247559	0.0614859	0.348297	0.209187	0.157859	0.242613	-0.390996	-0.538855	-0.147616	-0.277852	0.187635	0.169961	-0.178126	-0.0504093	0.0465963	-0.47961	-0.277827
ENSMUSG00000020190	Mknk2	-0.469255	-0.108795	-0.495187	-0.341633	-0.503695	-0.546423	-0.568658	-0.245813	0.0985698	0.00788763	0.0571139	0.188005	-0.290596	0.0524719	-0.0798159	0.242074	0.241825	-0.0832629	0.176453	0.300722	0.0843709	0.306741	0.462576	0.10887	0.480668	0.413416
ENSMUSG00000020205	Phlda1	0.10389	-0.0608141	0.418458	0.0489177	-0.0530654	0.587827	0.732746	0.492026	-0.229187	0.269296	0.316317	0.426637	0.38406	0.224758	0.408864	-0.680087	-0.617936	-0.257162	-0.112599	0.250502	0.107073	-0.0508573	0.0321147	-0.144176	-0.491716	-0.260237
ENSMUSG00000020211	Sf3a2	0.254931	0.0262408	-0.124035	-0.306313	0.00541382	0.220572	-0.0820243	0.109099	-0.212904	-0.357202	-0.485601	-0.253467	-0.0191004	-0.230595	0.107954	0.166176	0.10998	0.381174	0.412592	-0.174245	0.408135	0.0755555	0.131807	0.427333	0.0836432	-0.365702
ENSMUSG00000020224	Llph	-0.170473	0.422973	-0.320753	0.0689499	0.107187	0.105134	-0.0128967	-0.145392	0.515182	0.0124826	0.232873	0.20929	0.285973	0.599181	0.389859	0.0804626	-0.134548	-0.266387	-0.0878814	-0.184164	-0.245164	0.502153	0.534565	0.0765065	0.107688	-0.223085
ENSMUSG00000020230	Prmt2	-0.281919	0.266565	-0.48209	-0.0791002	-0.373092	-0.251576	-0.152268	-0.196539	0.214714	-0.0425441	0.123101	0.268733	-0.0873579	0.497436	0.32147	0.122341	-0.171614	-0.108698	-0.207379	0.175289	-0.131881	0.21257	0.62369	-0.0252266	0.439112	0.200519
ENSMUSG00000020231	Dip2a	0.208485	0.400044	0.042186	0.0439423	0.184744	0.171564	0.126918	0.265633	0.476378	0.557843	0.4199	0.537975	0.640234	0.498523	0.365973	-0.0570573	-0.00142519	-0.246024	0.0100362	0.028511	0.0194544	0.315088	0.382921	0.409591	-0.00255129	0.276093
ENSMUSG00000020232	Hmg20b	0.609671	0.200888	0.575226	0.074023	0.339998	0.377731	0.404996	0.321325	0.129465	0.0651718	0.0866	0.181195	0.213618	-0.102487	0.138215	-0.234518	-0.0358705	0.400476	0.311025	0.0257372	0.130077	-0.0205588	-0.189227	-0.04965	-0.274155	0.166574
ENSMUSG00000020235	Fzr1	0.0366493	0.203135	-0.255879	0.0154433	0.0571084	-0.157211	-0.358545	-0.34081	-0.221875	0.0807252	-0.180311	-0.302374	-0.0390671	-0.102063	-0.33227	0.502397	0.407826	0.210662	0.144453	-0.0178877	0.0298072	0.063672	0.167503	0.249686	0.0186052	0.0513817
ENSMUSG00000020246	Hcfc2	0.00251127	0.209229	0.284515	0.18147	-0.0697031	0.172869	0.387406	0.314774	0.286337	0.544632	0.613596	0.709987	0.470036	0.518876	0.370284	-0.493174	-0.468702	-0.374701	-0.166799	0.311125	-0.136299	0.212676	0.310337	-0.104183	-0.161348	0.290776
ENSMUSG00000020248	Nfyb	0.353447	0.383607	-0.130239	0.00838682	0.095781	0.237004	0.412391	0.44474	0.357795	0.165385	-0.0444473	0.239517	0.389314	0.628967	0.642636	-0.183438	-0.29115	-0.301254	-0.258664	-0.32774	-0.0525605	-0.292939	0.0734752	0.0100513	0.12911	-0.102014
ENSMUSG00000020250	Txnrd1	0.103041	-0.374002	-0.0141502	-0.568336	-0.239506	0.224274	0.297302	0.516352	-0.355654	-0.133454	-0.243721	0.122863	0.117275	-0.264112	0.3122	-0.233539	-0.0275143	0.329703	0.533266	0.409198	0.682472	0.064281	0.118223	0.404424	0.138523	-0.126698
ENSMUSG00000020253	Ppm1m	0.220474	0.191641	0.158413	0.313361	0.482249	-0.132299	0.274885	0.085592	0.310701	0.121384	0.240156	0.0481145	0.446856	0.186812	0.180994	-0.0199928	0.304867	-0.160903	0.098047	-0.37698	-0.05411	0.0181413	-0.0617358	0.0787076	0.0130831	0.0307643
ENSMUSG00000020255	D10Wsu102e	0.286124	-0.0521852	-0.0117963	-0.228582	0.216857	-0.237509	-0.24476	-0.00687332	-0.234282	-0.211755	-0.428929	-0.406762	0.003201	-0.487402	-0.0642618	0.233903	0.529895	0.352772	0.523974	-0.261036	0.305453	-0.14053	-0.180779	0.329202	0.0911654	-0.0564326
ENSMUSG00000020263	Appl2	-0.32892	-0.337079	-0.376018	-0.236241	-0.433139	-0.174268	-0.132369	0.134745	-0.137634	0.373022	0.156436	0.183054	-0.00860073	0.0925352	-0.0297012	0.160965	0.0109393	-0.11366	-0.119754	0.496421	0.503771	0.149739	0.348154	0.2241	0.334769	0.15749
ENSMUSG00000020268	Lyrm7	0.0604736	0.357805	0.0356539	0.299442	0.408663	-0.0465351	-0.293908	-0.438869	0.624787	-0.124184	0.0889866	-0.180438	0.019364	0.142688	-0.35193	0.369333	0.312355	-0.0526731	-0.211837	-0.46945	-0.556892	0.0722329	-0.192806	-0.0350677	0.132649	0.123708
ENSMUSG00000020271	Fbxw11	0.419043	0.292434	0.335732	0.439785	0.281521	0.161366	0.0938311	-0.00677879	-0.110495	0.136854	-0.133631	-0.217261	-0.12436	-0.0691354	-0.195581	0.0300719	-0.065291	0.103859	-0.113372	-0.279395	-0.214458	-0.349486	-0.351378	-0.353215	-0.379298	0.0106143
ENSMUSG00000020273	Papolg	-0.267526	-0.372205	-0.0232973	-0.249637	-0.409104	0.000625199	0.193195	0.372996	0.148779	0.289043	0.301444	0.509819	0.178967	0.169885	0.10133	-0.320289	-0.243871	-0.219396	-0.174709	0.567189	0.171736	0.0440972	0.116069	0.253014	0.393986	0.417017
ENSMUSG00000020275	Rel	-0.0248383	0.191918	-0.551879	-0.139258	-0.0195486	-0.570735	-0.491437	-0.380651	-0.0545157	-0.0670899	-0.283522	-0.361299	-0.113697	-0.0294877	-0.118388	0.602983	0.532573	0.114701	0.212309	-0.182555	0.138957	0.0147178	0.292355	0.186889	0.383623	0.0706858
ENSMUSG00000020277	Pfkl	0.2696	0.533517	0.124459	0.11382	0.2654	0.45409	0.352636	0.19559	0.561961	0.152065	0.299666	0.41058	0.595087	0.624738	0.435783	-0.243886	-0.24548	-0.295001	-0.115135	-0.289355	-0.35156	0.166514	0.187848	0.0698811	-0.178911	-0.0592874
ENSMUSG00000020282	Rhbdf1	-0.147051	-0.297987	-0.0547105	-0.244999	-0.540026	-0.0278346	0.188673	0.319274	-0.501541	0.406164	0.0739138	0.263122	-0.0454442	-0.0258616	0.139042	-0.248609	-0.256912	-0.0888866	0.10684	0.648023	0.452765	-0.119255	0.236048	-0.0223456	-0.00226576	0.159374
ENSMUSG00000020284	1810043G02Rik	-0.00532423	-0.00755518	0.290822	-0.108559	-0.0714019	-0.0703794	0.224483	0.107024	0.195935	0.0262018	0.35125	0.384404	0.208074	0.0977885	0.170664	-0.188553	0.0417758	-0.0128723	0.132682	0.27509	0.0508619	-0.0335793	0.0645288	-0.125312	0.249709	0.28532
ENSMUSG00000020287	Mpg	0.0820772	0.271222	0.0431533	0.234432	0.0455464	0.00797813	0.13524	0.157296	0.243611	0.538628	0.293169	0.251463	0.520518	0.512921	0.204517	-0.209821	-0.28202	-0.521248	-0.524959	-0.142028	-0.326512	-0.253717	0.00522693	0.0404868	-0.0260442	0.157492
ENSMUSG00000020297	Nsg2	0.267586	0.30529	0.599041	0.399481	0.20344	0.264712	0.632876	0.346977	0.32965	0.38992	0.615438	0.641818	0.367702	0.494018	0.431058	-0.561896	-0.452163	-0.311672	-0.380821	0.0355171	-0.27754	-0.183809	-0.0731089	-0.448879	-0.282122	0.266295
ENSMUSG00000020307	Cdc34	-0.141633	-0.0316708	0.14676	0.0422649	-0.065961	0.0859672	-0.231963	0.149078	0.180433	0.339513	0.329555	0.43036	0.212506	0.135188	-0.0673164	-0.191025	-0.165448	-0.347929	-0.364661	0.0149369	-0.224235	0.101154	-0.0619026	0.126375	-0.229335	0.257748
ENSMUSG00000020308	Tpgs1	0.174532	-0.0320364	-0.0898428	-0.240868	-0.33706	-0.0636206	-0.0999911	0.155969	-0.572879	-0.0204841	-0.433318	-0.0594293	-0.37341	-0.262542	0.00450221	0.194315	0.0838852	0.392209	0.343081	0.294648	0.532034	-0.20849	0.189307	0.165836	0.152737	0.0912749
ENSMUSG00000020312	Shc2	0.205682	0.349039	0.153865	0.403853	0.469276	0.0319293	-0.0727214	-0.178933	0.670353	-0.178422	0.0064424	-0.120207	0.0680435	0.144499	-0.0901312	0.313094	0.132491	0.288934	-0.112085	-0.290943	-0.300181	0.196597	-0.0689617	0.157431	0.41086	0.104419
ENSMUSG00000020326	Ccng1	0.287248	-0.184132	0.240239	-0.246353	-0.203768	0.184358	0.111986	0.499178	-0.173105	0.152828	-0.196593	0.201487	-0.159487	-0.190486	0.0316612	-0.166991	-0.0943916	0.114971	0.111336	0.203429	0.361038	-0.38221	-0.269667	0.0125447	0.00300122	0.225314
ENSMUSG00000020328	Nudcd2	-0.209909	-0.338934	-0.296206	-0.301524	-0.362262	-0.22489	-0.110464	0.168418	0.0571053	-0.0733545	-0.10103	0.137827	-0.25659	0.00314274	0.0207502	-0.159633	-0.0333763	-0.193441	-0.075303	0.0594376	0.0459541	-0.106323	-0.0783917	0.0268115	0.209857	0.254325
ENSMUSG00000020359	Phykpl	-0.0634696	-0.243955	-0.324263	-0.224684	-0.329276	0.349354	0.0119342	0.25846	-0.373209	-0.181187	-0.506813	-0.211792	-0.179876	-0.138241	0.0259038	0.193651	-0.21991	0.402214	0.186472	0.31911	0.580088	0.202369	0.292929	0.50489	0.316593	-0.402735
ENSMUSG00000020361	Hspa4	0.561198	0.319379	0.246506	-0.0630903	0.393456	0.241691	0.354437	0.344633	0.211602	0.216314	0.0833573	0.157576	0.593548	0.189963	0.351043	-0.37375	-0.0204854	-0.206356	0.0615337	-0.420778	-0.162783	-0.256691	-0.244003	0.011589	-0.426108	0.0388944
ENSMUSG00000020385	Clk4	0.54842	0.419457	0.39789	0.203376	0.479404	0.108813	0.319879	0.0341551	0.512951	-0.218966	0.096583	0.0701908	0.228068	0.145847	0.162615	-0.110059	0.180375	0.191038	0.166565	-0.433983	-0.323054	-0.146385	-0.268169	-0.203277	-0.0500749	0.205118
ENSMUSG00000020388	Pdlim4	0.132291	-0.0337176	0.0976269	0.180297	0.0310398	0.047448	0.48918	0.455037	-0.0612613	0.436257	0.196852	0.258815	0.297562	0.254475	0.36798	-0.353754	-0.163472	-0.408187	0.0382236	-0.0392937	0.213405	-0.119276	0.0328722	-0.0581799	-0.2164	-0.0361113
ENSMUSG00000020389	Cdkl3	0.650114	0.662786	0.205574	0.441979	0.454448	-0.0429697	-0.00867505	0.0772995	0.259431	0.202952	-0.155195	-0.0577858	0.153977	0.227128	0.082109	0.120749	0.263451	-0.136007	0.0303228	-0.747754	-0.43559	-0.469184	-0.34677	-0.191578	-0.338458	0.218373
ENSMUSG00000020392	Cdkn2aipnl	0.00445545	-0.0137003	-0.0442197	-0.358108	-0.260319	-0.266831	-0.326476	-0.0569788	-0.120445	-0.223364	-0.124057	0.148347	-0.318932	-0.292505	-0.0386562	0.101729	0.371579	0.30062	0.647989	0.170546	0.252834	0.170451	0.232015	0.0478243	0.149336	0.360301
ENSMUSG00000020393	Kremen1	0.197068	0.619483	-0.15118	0.272871	0.36665	-0.3384	-0.361517	-0.356866	0.461806	0.190809	0.128339	-0.070118	0.269733	0.328703	0.0419276	0.324653	0.379863	-0.30278	-0.163056	-0.627929	-0.513796	-0.0954803	0.0355339	-0.0437415	-0.0324731	0.228004
ENSMUSG00000020397	Med7	0.138993	0.00273166	0.102419	0.0527323	0.110309	0.564678	0.392121	0.342278	-0.177204	0.180156	0.058527	0.0435741	0.552214	0.159484	0.307454	-0.318865	-0.437873	-0.170672	-0.267957	-0.0802747	0.107846	0.00714562	0.0435897	0.294578	-0.333763	-0.470944
ENSMUSG00000020400	Tnip1	0.683251	0.528118	0.372464	0.228133	0.494268	0.230853	0.204693	0.307937	0.31942	0.384853	0.0566339	0.205617	0.496024	0.179627	0.185817	-0.105429	0.141205	-0.0615228	0.1309	-0.392548	-0.245674	-0.210539	-0.24948	0.161819	-0.384983	0.296178
ENSMUSG00000020412	Ascc2	0.255109	0.041831	0.541076	0.30352	0.176609	0.145824	0.422921	0.107444	0.240992	-0.0202279	0.181481	0.146229	-0.178369	-0.00399305	0.0880459	-0.370696	-0.183105	-0.044851	0.0165876	-0.115673	-0.260666	-0.206183	-0.397881	-0.503217	-0.324574	0.146207
ENSMUSG00000020413	Hus1	-0.414026	-0.367271	-0.379567	-0.203213	-0.360975	0.147858	0.272294	0.108749	-0.0546792	-0.240079	-0.12319	-0.0212202	-0.187918	0.142525	0.272945	-0.146518	-0.448611	-0.0337878	-0.10549	0.337368	0.283332	0.281042	0.34721	0.176773	0.388937	-0.398413
ENSMUSG00000020423	Btg2	-0.137766	-0.54103	-0.213564	-0.518364	-0.566281	-0.0262686	-0.0237681	0.147233	-0.696375	-0.138286	-0.341086	-0.163224	-0.456452	-0.471704	-0.0691473	0.00160171	-0.0529047	0.388044	0.377759	0.584316	0.737363	-0.0302262	0.147491	0.0331859	0.104641	-0.101808
ENSMUSG00000020427	Igfbp3	-0.151753	0.0186685	0.160899	0.00236858	-0.326819	0.0437034	0.130728	0.27026	-0.0573741	0.427641	0.407988	0.636297	-0.00217066	0.2901	0.313332	-0.427108	-0.410862	-0.36099	-0.275987	0.364723	-0.126345	-0.0897433	0.109897	-0.349706	-0.292752	0.334177
ENSMUSG00000020430	Pes1	-0.57322	-0.231133	-0.550923	-0.138572	-0.208868	-0.0290497	-0.311309	-0.205331	0.287716	0.00237209	0.0269504	-0.103918	0.121069	0.193472	-0.159297	0.24922	-0.115837	-0.210335	-0.273314	0.167424	0.00674283	0.517301	0.376894	0.533643	0.519303	-0.221701
ENSMUSG00000020436	Gabrg2	-0.242967	-0.104751	-0.382827	-0.399455	-0.559453	0.230349	-0.213539	0.129309	-0.322684	0.0819022	-0.119326	0.191016	0.0652796	0.093756	-0.00128962	-0.0280064	-0.352565	-0.0155679	-0.0962482	0.401114	0.273828	0.234471	0.511133	0.432997	0.141393	-0.055723
ENSMUSG00000020437	Myo1g	0.515937	-0.0591322	0.151546	-0.0693599	0.151517	-0.241439	0.0386861	0.132324	-0.417482	-0.114357	-0.468815	-0.353868	-0.299301	-0.501441	-0.123166	0.0853785	0.498678	0.252505	0.515852	-0.324031	0.262553	-0.565648	-0.486721	-0.138502	-0.267458	0.125719
ENSMUSG00000020441	2310033P09Rik	-0.183593	-0.253015	-0.00623692	-0.323006	-0.187773	-0.151851	-0.0935643	-0.168791	0.0519346	-0.116488	0.15802	0.0252267	0.0637594	-0.232993	-0.0931915	0.0114405	0.189433	0.192793	0.309707	0.357347	0.218014	0.282168	0.202506	0.249282	0.317605	0.185476
ENSMUSG00000020444	Guk1	-0.443407	0.0618283	-0.100727	0.169974	-0.151078	0.154031	-0.0639697	-0.135624	0.38436	0.0893911	0.354083	0.316763	0.0860633	0.417231	0.0486016	-0.0878411	-0.437525	-0.298347	-0.361814	0.175774	-0.308061	0.515549	0.371183	0.0442002	0.0826675	-0.0902976
ENSMUSG00000020448	Rnf185	0.187676	-0.274346	0.335402	-0.0699499	0.0122456	0.438568	0.303564	0.547185	0.0950932	0.0512338	0.039555	0.305793	-0.0246978	-0.0690243	0.145975	-0.324441	-0.323865	0.0590252	-0.203163	0.112678	0.251655	-0.107432	-0.307266	0.0469719	-0.109936	0.0214344
ENSMUSG00000020451	Limk2	-0.407973	0.0271026	-0.463224	-0.136664	-0.129044	0.386239	-0.179001	-0.258518	-0.0528466	-0.271618	-0.143304	-0.173777	-0.0323077	0.173029	0.0796937	0.314291	-0.276038	0.240755	-0.190561	0.228967	0.12688	0.622402	0.596499	0.479416	0.26815	-0.600497
ENSMUSG00000020453	Patz1	-0.0892743	0.341547	0.125392	0.483397	0.122785	-0.236366	-0.15804	-0.308826	0.152662	0.327338	0.356481	0.0805711	0.21574	0.309549	-0.217709	0.0218497	0.0144452	-0.469213	-0.426767	-0.264833	-0.592794	-0.168954	-0.0485493	-0.271095	-0.153103	0.222287
ENSMUSG00000020457	Drg1	0.0542456	0.0832907	0.330772	0.401422	0.504592	-0.0574109	0.0829735	-0.34811	0.285979	-0.0861067	0.33152	-0.260777	0.276608	-0.0840483	-0.272761	0.168396	0.251459	0.135471	-0.0213503	-0.190883	-0.211124	0.135976	-0.213249	-0.267432	-0.051718	-0.134924
ENSMUSG00000020459	Mtif2	0.0530795	-0.205279	-0.280342	-0.378939	-0.148711	0.0268222	0.024207	0.330857	-0.225274	0.277152	-0.0950221	0.073658	0.153364	-0.0996323	0.222422	0.133776	0.153921	0.146836	0.351448	0.334752	0.752008	0.218502	0.352877	0.516803	0.155497	-0.0329898
ENSMUSG00000020462	Cfap36	-0.190743	0.0927853	-0.412319	-0.259474	-0.522492	0.245229	-0.106491	0.291982	0.0398531	0.264304	-0.00259205	0.398189	0.300286	0.498272	0.264153	-0.0837473	-0.491708	-0.325246	-0.417598	0.229507	0.050493	0.0686344	0.487089	0.441025	0.303735	0.0371154
ENSMUSG00000020463	Ppp4r3b	0.0653433	-0.179372	0.408569	0.296352	0.28592	-0.0261298	0.448665	0.24424	0.276579	0.329793	0.496699	0.21824	0.562611	0.0949102	-0.0633653	-0.348437	0.017313	-0.30528	-0.138794	-0.0029929	-0.10335	-0.0797587	-0.311628	-0.0352119	-0.0474511	0.2125
ENSMUSG00000020471	Pold2	-0.128405	-0.0794969	0.155187	0.21139	-0.11304	0.142898	0.288407	0.100412	0.185321	0.0688488	0.260531	0.131161	0.0931976	0.261981	0.125324	-0.236077	-0.446204	-0.170234	-0.388395	0.131562	-0.0707499	-0.0523726	0.00196017	-0.292617	0.173227	-0.10216
ENSMUSG00000020482	Ccdc117	0.184574	0.192512	0.288504	0.177982	-0.13002	0.318004	0.647685	0.430706	-0.0845475	0.329832	0.247135	0.442161	0.269057	0.455913	0.482868	-0.633491	-0.551069	-0.497693	-0.176956	-0.0124141	-0.198991	-0.364756	-0.0408642	-0.432679	-0.458941	-0.038832
ENSMUSG00000020485	Supt4a	0.569973	0.638801	0.210733	0.108115	0.140063	0.0984744	0.180563	0.448106	0.066993	0.327693	-0.0647874	0.414741	0.324542	0.451111	0.603085	-0.217641	-0.0810557	-0.226312	0.007639	-0.391964	-0.204925	-0.475738	-0.0352567	-0.0573525	-0.291217	0.20455
ENSMUSG00000020496	Rnf187	0.0180737	-0.0176763	-0.203847	-0.220464	-0.331541	0.140171	0.353683	0.498704	-0.129038	0.403461	0.189419	0.432945	0.360937	0.41381	0.594358	-0.360774	-0.329575	-0.468122	-0.0275545	0.11379	0.339394	-0.0665591	0.335277	-0.0179036	-0.183451	-0.10296
ENSMUSG00000020519	Sap30l	0.117609	0.358384	0.248139	0.332754	0.0484538	0.132646	0.213444	0.0392642	0.267034	0.278907	0.396307	0.442192	0.152958	0.401272	0.101903	-0.0437065	-0.132384	-0.0380529	-0.207752	0.163201	-0.189451	0.058192	0.207042	-0.0765651	0.0390211	0.362469
ENSMUSG00000020521	Rnft1	-0.09977	-0.159918	-0.349643	-0.0713784	0.123454	-0.236672	-0.312729	-0.367347	-0.0751543	-0.42503	-0.339431	-0.565118	-0.310582	-0.344173	-0.272023	0.690327	0.582006	0.485983	0.246604	-0.0808047	0.357994	0.162815	0.0596637	0.274626	0.447134	-0.234169
ENSMUSG00000020524	Gria1	0.321343	0.693409	-0.0524791	0.159482	0.318125	0.367066	-0.140613	0.0168901	0.366058	-0.0148764	-0.0912473	0.137356	0.314113	0.459166	0.2234	0.087638	-0.0655662	-0.102834	-0.150634	-0.57939	-0.468587	0.0982058	0.118322	0.196401	-0.255825	-0.118069
ENSMUSG00000020526	Znhit3	-0.122482	-0.0198722	-0.271921	-0.00915322	0.0394853	0.00423067	0.0270882	0.0385752	0.347929	0.127865	0.126464	0.0454568	0.380641	0.326252	0.149844	0.0473684	-0.0907438	-0.33442	-0.334255	-0.166967	0.0342368	0.158314	0.203926	0.443305	0.306381	-0.139895
ENSMUSG00000020527	Myo19	-0.615346	-0.371548	0.0166725	0.0241507	-0.183066	-0.222257	-0.0412119	-0.335665	-0.0427672	0.037008	0.524405	0.108434	-0.0218369	-0.0841361	-0.269541	-0.0586768	-0.0266283	-0.0588021	-0.0580234	0.555592	-0.00122599	0.444367	0.224589	-0.235072	0.106132	0.0549109
ENSMUSG00000020528	Prpsap2	0.291919	0.0614282	0.119855	0.014302	0.109151	0.0151627	0.172949	-0.0366969	-0.110354	-0.0569107	-0.0605712	-0.166137	0.0121981	-0.211932	0.0150631	0.132136	0.180468	0.523475	0.420171	0.199334	0.306245	0.108423	0.116247	0.0735952	0.0638056	0.0725508
ENSMUSG00000020536	Llgl1	0.289342	0.229174	-0.223942	-0.204002	-0.117681	0.0494255	-0.158587	0.0600675	-0.119486	0.0609938	-0.215043	0.0275877	-0.154415	0.040577	0.0572303	0.337483	0.205877	0.248578	0.102962	0.00528643	0.344746	-0.0973529	0.233683	0.168886	0.105771	0.164638
ENSMUSG00000020538	Srebf1	-0.0502978	0.333223	0.068327	0.281587	-0.0247465	0.020152	0.0552444	-0.13356	0.322228	0.321822	0.456218	0.382954	0.00217885	0.424676	0.102055	-0.00570562	-0.193192	-0.200345	-0.415119	0.156905	-0.32787	0.0518347	0.201629	-0.313172	-0.0368829	0.365266
ENSMUSG00000020541	Tom1l1	0.350376	0.279994	-0.15392	0.0183179	0.00767675	0.106977	0.0163001	0.453085	0.121929	0.489139	-0.109811	0.261895	0.337023	0.361902	0.235519	0.0689013	0.0324813	-0.252377	-0.157862	-0.208022	0.136609	-0.239247	0.0886446	0.503419	0.0983831	0.253773
ENSMUSG00000020549	Elac2	0.0623337	0.0557375	0.025118	0.239815	0.0146047	0.258905	0.111767	0.355714	0.0249705	0.334048	-0.0290037	0.189615	0.176778	0.229552	-0.00702873	-0.200509	-0.285875	-0.381005	-0.345333	-0.1491	-0.235794	-0.175437	-0.192309	0.129024	-0.245743	0.0480017
ENSMUSG00000020553	Pctp	0.130007	0.251333	0.0727055	0.312515	0.305028	-0.0765822	0.403405	0.0139016	0.450908	0.21476	0.380958	0.161405	0.406842	0.372767	0.289929	-0.0272124	0.00386265	0.000254506	0.0975819	0.0491457	0.0307186	0.33342	0.322876	0.0589451	0.228781	0.0947559
ENSMUSG00000020561	Twistnb	0.145094	-0.0164221	0.0595329	-0.277079	-0.248873	0.365766	0.459964	0.574305	-0.231864	0.0394917	-0.120628	0.34338	0.23561	0.142471	0.550775	-0.333179	-0.424744	0.195116	0.270969	0.432984	0.484487	0.0800887	0.372028	0.290275	0.1814	-0.148757
ENSMUSG00000020573	Pik3cg	0.780575	0.586645	0.325723	0.188005	0.516477	0.148669	0.441008	0.335132	0.25952	0.102309	-0.0271429	0.114188	0.357888	0.262686	0.565575	-0.152118	0.148866	0.0277925	0.332121	-0.569486	-0.0185195	-0.282848	-0.132286	-0.183491	-0.322677	-0.00325088
ENSMUSG00000020576	Nbas	0.249606	0.0130617	-0.132849	0.107969	0.349138	0.151897	0.0925532	-0.192894	-0.100519	-0.405798	-0.426331	-0.692299	-0.148301	-0.239148	-0.0488263	0.51412	0.261248	0.560821	0.158939	-0.255707	0.393538	0.0323715	-0.0308772	0.183873	0.220418	-0.58111
ENSMUSG00000020577	Tspan13	-0.105609	0.164765	-0.392541	-0.162963	-0.0621406	0.170546	-0.0990854	-0.034733	-0.00661142	-0.178617	-0.253945	-0.0776135	0.141944	0.281698	0.214781	0.11304	-0.262863	0.00585291	-0.320246	-0.0803881	-0.0454532	0.107339	0.32429	0.447118	0.281692	-0.339418
ENSMUSG00000020589	Fam49a	-0.127856	0.470888	-0.0898797	0.333743	0.088895	0.23968	0.0603693	-0.0611432	0.549502	0.195851	0.271975	0.28628	0.345719	0.660231	0.25621	0.0631237	-0.379722	-0.170263	-0.340871	0.0367255	-0.363897	0.428107	0.468757	0.187742	0.258436	-0.0641179
ENSMUSG00000020592	Sdc1	0.732336	0.222904	0.371214	-0.18166	0.166829	0.224475	0.265423	0.606941	-0.0604229	0.123084	-0.222974	0.200492	0.333606	-0.0820424	0.329316	-0.224022	0.133723	0.247382	0.462957	-0.165497	0.263063	-0.386043	-0.24533	0.162618	-0.165698	0.218291
ENSMUSG00000020598	Nrcam	-0.343267	-0.057262	-0.421318	-0.343924	-0.367049	-0.0421985	-0.272729	-0.0808751	-0.0106861	-0.0710279	0.0690915	0.181642	0.00293003	0.0731291	0.19603	0.188579	-0.0322478	0.278409	0.241933	0.488196	0.380034	0.664015	0.743345	0.383169	0.391612	0.00352331
ENSMUSG00000020601	Trib2	0.13063	0.169464	0.475786	0.584134	0.505575	0.382234	0.192671	-0.0970687	0.291458	-0.0661635	0.22098	-0.0326107	0.0757968	0.0592519	-0.20973	-0.0911681	-0.219093	0.0943981	-0.449248	-0.231393	-0.517926	0.057477	-0.392522	-0.216366	-0.34437	-0.0978262
ENSMUSG00000020604	Arsg	-0.0679092	-0.122027	-0.261255	-0.0331462	0.0478208	0.106777	0.0128131	-0.067212	0.167938	-0.0372043	-0.0983077	-0.148107	-0.0993089	-0.025323	-0.187649	0.397527	0.195065	0.199761	0.0879936	0.156921	0.336978	0.325101	0.207574	0.457904	0.38121	-0.0695895
ENSMUSG00000020605	Hs1bp3	-0.0590519	0.186692	0.0472816	0.300625	0.0783695	0.00409954	-0.0292518	-0.370877	0.014441	-0.160619	0.0402357	-0.183048	-0.265656	-0.0812645	-0.141282	0.293389	0.0776013	0.430354	0.340036	0.205838	-0.0254386	0.436177	0.273693	-0.227957	-0.0175911	-0.0844103
ENSMUSG00000020608	Smc6	0.381088	0.69851	-0.0617246	0.194113	0.092868	-0.157779	-0.0476247	0.0831649	0.30448	0.454909	0.0786613	0.308067	0.392347	0.520581	0.215479	0.163519	0.170875	-0.261145	0.0563135	-0.245378	-0.25434	-0.181932	0.245723	0.123546	0.0629073	0.435716
ENSMUSG00000020614	Fam20a	0.262833	0.243846	-0.00310523	-0.0542259	-0.181842	0.20119	0.250955	0.477646	-0.431624	0.515615	-0.041949	0.277227	0.345085	0.288575	0.530198	-0.21814	-0.267837	-0.27595	0.067087	0.0401285	0.307444	-0.265014	0.259675	0.0661139	-0.359705	-0.163589
ENSMUSG00000020635	Fkbp1b	-0.166697	0.457959	-0.349611	0.249287	0.108268	0.0981424	-0.123616	-0.199992	0.155156	0.175383	0.19838	0.10012	0.16029	0.600055	0.332629	0.21382	-0.173329	-0.406817	-0.565789	-0.316335	-0.279849	0.119554	0.372568	-0.106956	-0.162504	-0.333515
ENSMUSG00000020638	Cmpk2	-0.187386	-0.31544	-0.0381882	-0.53815	-0.430029	0.529976	0.390515	0.32107	-0.238326	-0.339749	-0.115469	0.229487	0.0477271	-0.0105582	0.334579	-0.458045	-0.558995	0.180656	0.126888	0.525907	0.30348	0.220969	0.296328	0.275556	0.161869	-0.312891
ENSMUSG00000020640	Itsn2	0.46877	0.293616	0.269369	0.327936	0.0344937	0.051173	0.305339	0.419135	0.0524291	0.456489	0.109907	0.356746	-0.0057489	0.293391	0.252137	-0.0994766	-0.0738098	-0.217196	-0.132154	-0.157256	0.038295	-0.490355	-0.186077	-0.361139	-0.289141	0.324947
ENSMUSG00000020644	Id2	-0.0297283	-0.185225	0.0021734	-0.395089	-0.32634	0.64744	0.287654	0.637373	-0.060199	0.0597162	-0.0227497	0.468334	0.226398	0.252797	0.487943	-0.581973	-0.707927	-0.195474	-0.263518	0.18777	0.176855	0.0574199	0.109454	0.277453	-0.158653	-0.250058
ENSMUSG00000020646	Mboat2	0.320981	0.842608	-0.0666114	0.448137	0.445963	-0.0667375	-0.18738	-0.181649	0.623986	0.315077	0.222045	0.170217	0.395937	0.604761	0.169866	0.406289	0.250481	-0.1786	-0.230147	-0.508181	-0.448666	0.0626897	0.227062	0.0771987	0.0469935	0.239865
ENSMUSG00000020647	Ncoa1	-0.449666	-0.169415	-0.245546	-0.242941	-0.556124	0.253946	0.205268	0.161431	0.0831117	0.111144	0.273446	0.473629	0.107227	0.40569	0.317852	-0.226657	-0.602468	-0.0862429	-0.252481	0.707191	0.203431	0.431707	0.651074	0.284879	0.43617	-0.00267883
ENSMUSG00000020650	Bcap29	0.00636149	0.374168	-0.143496	-0.0061602	-0.0838383	-0.0507399	0.200467	0.089875	0.221462	0.0965569	0.157797	0.335864	0.248579	0.526681	0.51514	-0.319624	-0.249983	-0.395929	-0.0307513	-0.137949	-0.389328	-0.032716	0.235268	-0.248928	-0.126589	0.0705506
ENSMUSG00000020652	Cenpo	0.221464	0.189331	0.403777	0.0593681	0.327202	-0.0486453	-0.0710102	-0.0769589	0.425703	-0.177842	0.178481	0.205026	0.0705199	-0.102902	-0.176669	-0.111659	0.25149	0.173575	0.138398	-0.157021	-0.449151	0.0211587	-0.3261	-0.115508	-0.0775497	0.483559
ENSMUSG00000020653	Klf11	-0.437529	-0.39299	-0.372427	-0.347793	-0.588446	-0.178309	-0.313185	0.0525487	-0.244968	-0.00330809	-0.129229	0.161752	-0.447201	-0.0557011	-0.11872	0.00123029	-0.175441	-0.0902575	-0.228718	0.40186	0.145749	-0.0103438	0.115708	0.0705419	0.208195	0.187046
ENSMUSG00000020654	Adcy3	0.0304409	0.286023	-0.00936265	0.067926	0.157138	0.431208	0.208916	0.0344214	0.326954	0.0900538	0.15105	0.213058	0.071081	0.429513	0.292416	-0.106822	-0.300557	-0.240486	-0.275815	-0.145711	-0.23133	0.166831	0.121634	-0.0372976	-0.246214	-0.23429
ENSMUSG00000020657	Dnajc27	0.415604	0.362835	0.492312	0.326994	0.373212	-0.156688	0.228571	-0.0319667	0.0591714	0.204644	0.248681	0.0512158	0.255217	-0.046864	0.0858743	-0.0576504	0.277499	0.183308	0.458676	-0.0637113	-0.0479129	-0.0554834	-0.0418648	-0.297567	-0.199922	0.251674
ENSMUSG00000020658	Efr3b	-0.0173699	0.588985	-0.184949	0.189786	0.198877	-0.150275	-0.375715	-0.361606	0.390573	-0.00318815	0.177409	0.130708	0.10655	0.335346	0.0865521	0.407746	0.262401	0.0238358	0.0889385	-0.225707	-0.245412	0.431305	0.48328	0.0446732	0.108002	0.0963825
ENSMUSG00000020659	Cbll1	0.497902	0.435952	0.32206	0.120713	-0.0514854	0.170548	0.418709	0.355211	-0.0754844	0.180191	-0.024824	0.366054	0.0542159	0.265114	0.496861	-0.318702	-0.266753	0.00852497	0.172565	-0.0222861	-0.0500926	-0.336247	0.0538236	-0.246549	-0.286068	0.203678
ENSMUSG00000020664	Dld	-0.355319	0.022614	-0.196199	-0.144696	-0.382598	0.059975	0.290508	0.093115	0.173161	0.188885	0.454639	0.507042	0.275037	0.592446	0.53334	-0.328379	-0.524226	-0.357041	-0.401104	0.404912	0.00342197	0.188437	0.563667	-0.0232498	0.292132	0.00929399
ENSMUSG00000020674	Pxdn	0.393775	0.240983	-0.0161949	-0.188848	-0.131295	0.179354	0.438746	0.631336	0.058725	0.318794	-0.0534098	0.454842	0.429648	0.37588	0.678232	-0.329059	-0.240027	-0.166429	0.19351	0.0585847	0.248085	-0.177487	0.248897	0.317851	0.0597085	0.161225
ENSMUSG00000020677	Ddx52	0.0526505	0.16607	0.0086253	0.0790774	0.179737	0.033794	0.074373	-0.011598	0.626527	-0.144724	0.196019	0.120402	0.228415	0.351539	0.227059	0.00101373	-0.117748	-0.0208081	-0.415959	-0.20023	-0.205951	0.0248628	0.0131993	0.0341659	0.45441	0.0699771
ENSMUSG00000020680	Taf15	0.299769	-0.0465804	-0.360678	-0.316916	0.0664145	-0.112548	-0.171329	0.130984	-0.0687714	-0.261974	-0.666936	-0.417086	-0.140702	-0.278011	0.018577	0.407351	0.409059	0.439624	0.465082	-0.181892	0.465726	-0.055618	-0.000327816	0.572021	0.422769	-0.0858602
ENSMUSG00000020687	Cdc27	0.254509	0.189662	-0.359577	-0.217684	-0.00410171	-0.141669	-0.115756	0.129739	-0.125723	-0.0470604	-0.381523	-0.0856106	-0.261108	0.0689039	0.333028	0.338986	0.282687	0.158624	0.165197	-0.211955	0.410153	-0.187563	0.174884	0.122316	0.162799	-0.0524893
ENSMUSG00000020689	Itgb3	-0.258488	-0.278607	0.230759	-0.0797151	-0.217072	-0.0114869	0.353056	-0.00765821	-0.160306	0.137832	0.43349	0.272132	0.0734153	-0.0773109	-0.0236327	-0.314212	-0.0970482	-0.0101672	0.289746	0.627655	0.137537	0.237661	0.167749	-0.2306	-0.105825	0.134025
ENSMUSG00000020704	Asic2	-0.345029	-0.269753	0.127252	0.0271724	-0.206734	0.0651168	0.224655	-0.0555323	0.0206426	0.0740136	0.408265	0.219524	0.0840973	-0.0192529	-0.0234931	-0.238212	-0.315589	0.133553	0.126598	0.657626	0.127721	0.552553	0.343894	-0.026028	0.0712276	0.0363546
ENSMUSG00000020706	Ftsj3	0.302428	0.216704	-0.028826	0.0611224	0.133665	-0.345006	-0.11207	0.0820988	-0.123553	0.23396	-0.121274	-0.0371765	0.0208748	-0.0711677	0.0797111	0.452332	0.631804	0.120707	0.435214	-0.112161	0.387843	-0.225176	0.0619402	0.109604	0.144885	0.207975
ENSMUSG00000020708	Psmc5	0.340902	0.407472	0.329216	0.390868	0.287203	0.2608	0.704933	0.223176	0.346248	0.417203	0.435403	0.328429	0.404224	0.52638	0.435516	-0.27886	-0.243055	-0.295593	-0.0957413	-0.0519857	-0.161684	-0.114384	0.0387367	-0.37264	-0.257203	0.0360622
ENSMUSG00000020715	Ern1	0.281015	0.346533	0.267904	0.430283	0.526647	-0.19962	-0.191073	-0.251445	0.236512	0.153436	0.0358033	-0.186483	0.110038	-0.10554	-0.443091	0.20447	0.450823	0.0309217	0.163398	-0.382061	-0.460511	-0.0468253	-0.33251	-0.0478346	-0.211252	0.319177
ENSMUSG00000020716	Nf1	0.104849	0.0793055	-0.024393	0.108924	0.161741	-0.0884767	0.050843	-0.246035	-0.103145	-0.0518584	-0.0526507	-0.347204	0.00893341	-0.0758131	-0.0542287	0.446213	0.236994	0.413234	-0.0142836	0.133285	0.269393	-0.0674349	0.100776	0.0574671	0.338746	-0.140683
ENSMUSG00000020718	Polg2	-0.413193	-0.0514826	-0.295318	0.0607136	0.144206	-0.0409616	-0.238832	-0.548185	0.206606	-0.141303	0.249601	-0.244367	0.0705979	-0.0138457	-0.229909	0.386043	0.185623	0.195666	0.0276775	0.160235	0.0514334	0.786487	0.468951	0.2763	0.226506	-0.247653
ENSMUSG00000020719	Ddx5	-0.0992289	0.0440966	-0.149789	0.0170643	0.388795	-0.106102	-0.317661	-0.53803	0.128258	-0.513273	-0.222097	-0.595719	-0.199635	-0.253941	-0.270742	0.483047	0.472668	0.275641	0.15521	-0.390327	-0.113289	0.181868	-0.121269	-0.0103895	0.132551	-0.416025
ENSMUSG00000020734	Grin2c	-0.345516	0.23671	-0.0854874	0.447166	0.0441944	0.00546771	-0.119977	-0.388994	0.303177	0.0291903	0.279521	0.0547183	-0.0946596	0.402248	-0.181766	0.184818	-0.249909	-0.197869	-0.607945	-0.000994992	-0.499633	0.204683	0.175603	-0.224814	0.126657	-0.0355477
ENSMUSG00000020736	Nt5c	0.0105036	-0.029709	-0.22188	-0.284282	-0.084552	0.0434814	-0.145246	-0.0839491	-0.146165	-0.589494	-0.547946	-0.339256	-0.235441	-0.266004	0.102175	0.246264	0.0937261	0.633783	0.546909	0.0719086	0.312301	0.313952	0.280276	0.417581	0.405059	-0.331899
ENSMUSG00000020739	Nup85	0.652733	0.600383	0.224039	0.256877	0.331514	0.018634	0.318288	0.29612	0.188708	0.244057	0.00307358	0.177765	0.359152	0.316255	0.49563	-0.170596	0.0996716	-0.173311	0.256038	-0.527661	-0.191375	-0.342135	-0.0983678	-0.219373	-0.38733	0.148756
ENSMUSG00000020744	Slc25a19	-0.0832144	0.0298856	-0.262525	0.0115574	0.0614857	0.186287	0.121803	-0.209142	-0.201934	-0.125659	-0.0455912	-0.324109	0.0588683	0.0993047	0.0153285	0.23832	-0.0230095	0.0501568	-0.176643	-0.0517321	0.209177	0.0605454	0.233186	0.00418906	0.0622295	-0.51934
ENSMUSG00000020752	Recql5	-0.17386	-0.0743682	0.188783	0.212948	0.0190393	-0.111516	0.412635	-0.0338158	0.266173	0.151581	0.4797	0.146334	0.275282	0.322289	0.15362	-0.313455	-0.268162	-0.355371	-0.380301	0.106552	-0.224279	-0.142697	-0.0682747	-0.416411	0.153552	0.0135395
ENSMUSG00000020766	Galk1	0.228286	-0.0311831	0.212526	-0.0557437	0.00660936	0.185583	0.505032	0.30054	0.338163	-0.143745	0.0642409	0.258493	0.0569516	0.116376	0.2421	-0.32218	-0.211692	0.223284	0.123326	0.207619	0.0683812	0.0430624	0.00271338	0.0725468	0.321237	0.266955
ENSMUSG00000020770	Unk	-0.25789	0.0802406	-0.365107	-0.175787	-0.248167	-0.280023	-0.308032	-0.418383	0.287845	-0.206648	0.0757383	0.0524045	-0.280607	0.142424	-0.135032	0.171418	0.100199	-0.0854612	-0.112668	0.0244839	-0.266361	0.156768	0.249044	-0.0668202	0.287203	0.309527
ENSMUSG00000020773	Trim47	-0.167489	0.101707	-0.17425	0.00733309	-0.0542205	-0.115864	0.0631957	-0.165089	0.155182	-0.159161	0.187319	0.0187497	0.196431	0.218401	0.197517	0.125794	-0.0458735	0.187997	0.0364382	0.20099	0.159413	0.345092	0.509153	0.0274608	0.511107	-0.0980183
ENSMUSG00000020774	Aspa	-0.369851	-0.122529	-0.111448	0.0187801	-0.224866	-0.0383783	0.220396	0.0998431	0.113742	0.2898	0.497836	0.432522	0.157163	0.300799	0.40362	-0.203535	-0.269122	-0.189767	0.0322151	0.473402	0.287425	0.564274	0.613326	0.0427604	0.124474	0.00551693
ENSMUSG00000020775	Mrpl38	-0.183182	0.161159	-0.296643	-0.0677752	-0.0695449	-0.121072	0.100581	-0.0711718	0.213532	-0.0190436	0.222862	0.16682	0.29321	0.324137	0.456096	0.122171	0.038136	0.0517092	0.254171	0.200715	0.276296	0.527877	0.730483	0.271566	0.457044	-0.104735
ENSMUSG00000020794	Ube2g1	-0.447105	-0.0482263	-0.403594	-0.280752	-0.284541	-0.0125257	-0.0718242	-0.24517	-0.198756	-0.125602	0.0991295	-0.00305225	0.0858629	0.105192	0.274959	0.0844394	-0.141699	0.076399	0.202612	0.397109	0.309944	0.604121	0.771445	0.229483	0.228016	-0.393275
ENSMUSG00000020801	Med31	0.366277	0.115253	0.419507	0.603017	0.457186	0.000342477	0.108849	0.0445377	-0.0821991	0.343152	-0.0113478	-0.219467	-0.130814	-0.212736	-0.307201	0.129306	0.24549	-0.0247311	0.0311195	-0.306688	-0.0757637	-0.299955	-0.503178	-0.276294	-0.463054	0.0830514
ENSMUSG00000020802	Ube2o	0.105249	0.235176	0.350121	0.550065	0.39884	-0.0306896	-0.13722	-0.137634	0.310425	0.327481	0.288277	-0.0236467	0.343695	0.067833	-0.321888	0.0833572	0.0852966	-0.136781	-0.228285	-0.2477	-0.428568	0.0396974	-0.24398	-0.0183603	-0.177496	0.163345
ENSMUSG00000020806	Rhbdf2	-0.241236	-0.176735	-0.490419	-0.394224	-0.454959	-0.306433	-0.250883	0.0188929	-0.12444	-0.11322	-0.240956	-0.003626	-0.228591	0.0799832	0.0611707	0.260831	0.0824724	-0.0109803	-0.126009	0.196902	0.28539	-0.203448	0.202359	0.133225	0.597832	0.0812032
ENSMUSG00000020807	4933427D14Rik	0.140462	0.279515	0.0266973	0.477106	0.105923	-0.307055	0.169767	0.10106	-0.010037	0.593665	0.28383	0.146189	0.0975873	0.388353	0.27559	0.0951207	0.0445376	-0.337825	-0.283788	-0.104096	-0.0125098	-0.354786	0.00758393	-0.443318	-0.163672	0.165838
ENSMUSG00000020811	Wscd1	0.0697049	0.355913	0.429516	0.837105	0.466953	-0.280691	0.196625	-0.153136	0.477518	0.535968	0.65142	0.220059	0.222982	0.350555	-0.0278622	0.107316	0.135623	-0.259121	-0.258441	-0.0859635	-0.342507	0.0182449	-0.0704126	-0.447436	-0.0572627	0.33758
ENSMUSG00000020817	Rabep1	0.186145	0.468132	-0.324034	-0.0535315	0.0879088	-0.0965951	-0.353647	-0.157433	-0.13913	0.271686	-0.119061	-0.0925222	0.345424	0.182423	0.0470211	0.433585	0.363974	-0.111281	0.0797575	-0.286634	0.0447022	-0.030763	0.335956	0.412367	-0.0749641	-0.0389332
ENSMUSG00000020828	Pld2	-0.00382966	0.0955875	0.337755	0.461914	0.256506	-0.394974	0.144462	-0.246425	0.237496	0.366814	0.578066	0.126909	-0.128003	0.0736192	-0.093369	0.0144541	0.260025	-0.225317	-0.0133837	0.00848996	-0.168925	-0.0653951	-0.160137	-0.7515	-0.244049	0.344342
ENSMUSG00000020829	Slc46a1	0.147495	0.00767177	-0.0248565	0.107003	0.245278	-0.218198	0.161646	-0.18179	0.049449	-0.454754	-0.35676	-0.504314	-0.148389	-0.178164	-0.062707	0.274446	0.266336	0.403861	0.269996	-0.151819	0.0769309	-0.141882	-0.138092	-0.015962	0.485963	-0.189826
ENSMUSG00000020831	0610010K14Rik	0.17202	0.622713	-0.17475	0.32928	0.121863	0.190254	0.359391	0.0766643	0.348993	0.407369	0.27814	0.284697	0.453807	0.828654	0.502423	0.00377342	-0.290262	-0.357396	-0.34777	-0.150737	-0.210134	0.0411847	0.457178	-0.0186894	0.0180413	-0.0597138
ENSMUSG00000020841	Cpd	-0.258711	-0.0687293	-0.0392267	-0.00808398	-0.325342	-0.0919758	0.0696933	0.299443	0.255937	0.583905	0.530232	0.697919	0.197804	0.465044	0.210145	-0.306224	-0.306172	-0.531931	-0.45342	0.368206	-0.111238	0.00161505	0.155688	-0.0874074	0.0438024	0.503266
ENSMUSG00000020846	Rflnb	0.072639	0.259739	0.16966	0.324112	0.434465	0.171675	0.154248	-0.313096	0.088771	-0.396026	-0.033276	-0.338567	-0.0617211	0.0541157	0.00707256	0.129587	-0.0196755	0.232289	-0.0918941	-0.311037	-0.274147	0.040251	-0.119368	-0.392594	-0.110329	-0.48686
ENSMUSG00000020863	Luc7l3	-0.425479	0.0256555	-0.308156	-0.186147	-0.362632	0.0648059	-0.145904	-0.163902	0.169961	-0.106255	0.109475	0.182943	0.0183591	0.329277	0.118243	-0.0648151	-0.283926	-0.424352	-0.258858	0.0325236	-0.259523	0.144116	0.29973	-0.00706917	0.14396	-0.159613
ENSMUSG00000020864	Ankrd40	0.445146	0.100913	0.367259	-0.168715	0.0469872	0.401088	0.554586	0.776814	0.0763073	0.299616	0.131795	0.582946	0.52797	0.220744	0.600534	-0.478374	-0.223097	0.0558831	0.292868	0.191356	0.362487	-0.0190672	0.0938892	0.295504	-0.0643737	0.145182
ENSMUSG00000020865	Abcc3	0.644404	0.335052	0.247021	0.0489512	0.331366	4.37577e-05	0.439524	0.447025	0.0956456	0.188206	-0.0590384	0.123653	0.341055	0.142748	0.594302	-0.12071	0.139119	0.0899415	0.35181	-0.259133	0.287747	-0.30459	-0.0493832	-0.0267461	-0.0449372	0.0485181
ENSMUSG00000020868	Xylt2	-0.21061	-0.0446924	-0.36513	-0.135194	-0.114215	0.168508	-0.261763	-0.0518959	-0.1574	-0.129124	-0.337674	-0.263465	0.153116	0.0419036	-0.153246	0.262387	-0.126819	0.071397	-0.168777	0.018625	0.0212271	0.139659	0.153789	0.479509	0.22852	-0.415333
ENSMUSG00000020869	Lrrc59	0.295831	0.110539	-0.0826696	-0.200311	-0.106906	0.315114	0.0191969	0.348731	-0.155023	0.231734	-0.0988741	0.214596	0.137221	0.155668	0.155627	-0.0512385	-0.0963474	-0.103175	-0.310824	-0.103971	0.123756	-0.339197	-0.0664677	0.209068	-0.223425	0.110017
ENSMUSG00000020886	Dlg4	-0.353537	0.167165	-0.582948	-0.110435	-0.0604775	0.161434	-0.387107	-0.324801	0.237329	-0.283609	-0.0773814	-0.123634	0.0930583	0.295401	0.0671155	0.461756	-0.0733952	0.0926987	-0.297917	-0.0638859	-0.024321	0.552652	0.560688	0.462309	0.381534	-0.414868
ENSMUSG00000020888	Dvl2	-0.036705	0.111111	-0.0842665	-0.222413	-0.452593	0.0726114	0.0596837	0.228464	-0.168306	0.24007	0.0335359	0.422397	0.0139141	0.217691	0.239755	-0.151577	-0.285695	0.0292382	0.176142	0.497415	0.239084	0.142896	0.517841	0.167253	0.170957	0.242375
ENSMUSG00000020893	Per1	-0.50246	-0.372766	0.0777423	0.0576157	0.0985102	-0.0391203	-0.175467	-0.267797	0.345579	-0.0136653	0.488566	0.0722426	0.234014	-0.162742	-0.386042	-0.00215362	0.061212	0.0647805	-0.0202801	0.355445	-0.067378	0.758618	0.138859	0.298453	0.196334	0.0798245
ENSMUSG00000020895	Tmem107	0.0419851	-0.118065	0.422485	-0.15739	-0.229318	0.193174	0.194198	0.518918	0.0391683	0.200582	0.287578	0.71808	0.157529	0.0667513	0.208064	-0.544936	-0.230959	-0.191953	0.0703514	0.263411	0.0146617	-0.0661733	-0.0825569	0.0113081	-0.171358	0.403651
ENSMUSG00000020898	Ctc1	0.208826	0.0790894	0.432971	0.250536	0.348814	0.573012	0.320589	0.324895	0.260211	0.0589298	0.142583	0.235064	0.293952	0.074885	0.0874298	-0.169082	-0.259348	0.27674	-0.112906	0.11235	-0.034562	0.272852	-0.0920101	0.31317	-0.0695361	-0.0449231
ENSMUSG00000020899	Pfas	0.222682	0.398717	0.136731	0.292941	0.437626	0.048888	-0.306687	-0.15872	0.0821915	0.170402	-0.0244349	-0.176409	0.251705	0.00790658	-0.0866724	0.153859	0.177886	-0.0809814	-0.0777965	-0.501131	-0.397217	-0.0283304	-0.200518	0.038464	-0.441741	-0.100852
ENSMUSG00000020900	Myh10	0.18924	0.254962	-0.490705	-0.00367088	0.13264	-0.214542	-0.274573	-0.176951	0.123759	-0.202347	-0.488209	-0.387769	-0.328326	0.0479137	0.0555012	0.600937	0.394079	0.182259	0.0811132	-0.414983	0.136366	-0.0853271	0.10467	0.235521	0.330349	-0.0872179
ENSMUSG00000020901	Pik3r5	-0.0715	0.206735	0.18893	0.474264	0.345113	-0.449703	0.0157772	-0.131351	0.557016	0.473628	0.603973	0.31049	0.248418	0.316284	-0.0121638	0.0788345	0.316836	-0.339253	-0.127026	-0.0596529	-0.289723	0.135699	0.0110605	-0.142676	0.124876	0.503657
ENSMUSG00000020903	Stx8	0.508478	0.487231	0.037404	0.107173	0.395734	0.140541	0.210932	0.163203	0.194395	-0.0210566	-0.166073	-0.100149	0.456576	0.28717	0.42098	0.0693191	0.029141	0.0276868	-0.100126	-0.49932	-0.0831874	-0.305579	-0.0488988	0.134237	0.0614041	-0.192769
ENSMUSG00000020910	Adprm	-0.113877	-0.239959	-0.219568	-0.622346	-0.348195	-0.0973771	-0.0756703	0.116865	-0.26285	-0.2069	-0.127747	0.140772	-0.00302161	-0.224856	0.136972	-0.186457	0.131234	0.100745	0.469821	0.265992	0.241103	0.102093	0.178882	0.195838	0.0292541	0.132947
ENSMUSG00000020919	Stat5b	0.38901	0.324622	0.0504698	0.109971	-0.0550135	-0.356426	-0.0861686	0.103545	-0.0409864	0.156544	-0.247138	0.0739285	-0.360259	-0.0257837	0.0726663	0.282733	0.334798	0.207332	0.433884	-0.0146776	0.189473	-0.306487	0.0403001	-0.166589	0.167529	0.467078
ENSMUSG00000020921	Tmem101	0.0711962	0.576312	0.101744	0.477705	0.201414	0.101975	-0.0719008	-0.209169	0.302272	0.00329429	0.0662205	0.103122	0.0603471	0.404678	0.0503407	0.192216	-0.105746	0.020413	-0.218808	-0.203605	-0.514224	0.106187	0.159084	-0.0286723	0.0179632	0.0272379
ENSMUSG00000020922	Lsm12	0.145963	-0.0450391	0.0584732	0.0452425	0.123777	0.339391	0.0254973	0.100635	-0.0095511	0.1369	0.0347646	-0.0799411	0.178613	-0.062061	-0.0732288	0.0369089	-0.0634762	0.1954	-0.138354	0.0385189	0.083142	0.106257	-0.0993208	0.181333	-0.218645	-0.0797849
ENSMUSG00000020926	Adam11	-0.113123	0.538399	-0.120276	0.507385	0.120391	0.0145695	-0.0225714	-0.134659	0.372473	0.30811	0.28979	0.252671	0.147202	0.63597	0.303897	0.101775	-0.230071	-0.342189	-0.363981	-0.168698	-0.420891	0.243323	0.391737	-0.0865985	-0.034155	-0.0107982
ENSMUSG00000020928	Higd1b	0.382023	0.0126646	0.25767	-0.0505993	0.0644907	0.382827	0.513438	0.490107	0.108802	0.00990609	-0.0375506	0.178234	0.366327	0.129788	0.244492	-0.14788	-0.17748	0.165492	0.00588124	0.0935559	0.298746	-0.21619	-0.0830108	0.210505	0.243855	-0.0407313
ENSMUSG00000020935	Dcakd	0.0393215	0.111528	-0.275751	-0.15917	-0.137944	-0.16541	-0.0401913	-0.047403	-0.256725	-0.314144	-0.394766	-0.205382	-0.237979	0.0122403	0.127687	0.308108	0.185224	0.227455	0.248237	-0.0371754	0.228961	-0.19623	0.157679	-0.078953	0.299915	-0.210689
ENSMUSG00000020946	Gosr2	0.128499	0.0211165	0.353516	-0.0770193	-0.130266	0.290518	0.472276	0.669868	0.231005	0.425164	0.454515	0.830057	0.412007	0.43013	0.57599	-0.657824	-0.452118	-0.385505	-0.197169	0.205237	0.00881467	-0.109978	0.00845036	-0.0691558	-0.195615	0.29256
ENSMUSG00000020948	Klhl28	0.0895005	0.175183	-0.131628	0.207312	-0.129017	-0.159159	0.0706542	0.0944275	0.11018	0.273374	0.113491	0.139591	-0.0746936	0.358322	0.141681	0.136911	-0.0710732	-0.120911	-0.365513	0.0218251	0.0376674	-0.301326	0.0753508	-0.300156	0.228125	0.252097
ENSMUSG00000020949	Fkbp3	-0.00408257	0.50869	-0.214716	0.242105	0.276285	0.0771916	-0.120008	-0.363195	0.117501	-0.120154	0.0173291	-0.164655	0.145895	0.26165	0.212	0.380815	0.0469577	0.274144	0.0882912	-0.120432	-0.0787903	0.512756	0.551158	0.132166	0.0426398	-0.351425
ENSMUSG00000020950	Foxg1	-0.367196	-0.0501999	0.0074527	-0.254366	-0.302302	-0.0419977	-0.271213	-0.170365	0.0994235	-0.370371	0.113761	0.271125	-0.132321	-0.0143034	0.0638321	-0.119373	-0.164557	0.192225	0.122531	0.303661	-0.120029	0.419406	0.332656	0.028797	0.252146	0.0759668
ENSMUSG00000020954	Strn3	0.311284	0.381098	0.166379	-0.0865879	0.337541	0.0873434	-0.00126819	0.0512703	0.417651	-0.0910488	0.0920934	0.208922	0.360511	0.0992581	0.281835	-0.0408323	0.171061	0.296228	0.368776	-0.118765	-0.12178	0.336183	0.159406	0.264719	0.0284752	0.187232
ENSMUSG00000020955	Ap4s1	0.259898	0.134294	0.0815914	0.0163562	0.114342	0.072563	0.283839	0.365935	-0.26498	0.205643	-0.0279415	0.108454	0.429485	0.128404	0.314117	-0.147472	0.101274	-0.189936	0.153608	-0.197458	0.162211	-0.2929	-0.032979	0.0796951	-0.216276	-0.133255
ENSMUSG00000020973	Dnaaf2	0.0893022	-0.0137202	-0.19847	-0.264204	-0.141441	0.588429	-0.00799321	0.308736	-0.195793	-0.0359106	-0.38121	-0.0316151	0.108132	0.0530525	0.06895	0.107478	-0.298498	0.0959577	-0.101215	0.0363165	0.325194	0.0692605	0.153601	0.535627	0.00139722	-0.457058
ENSMUSG00000020986	Sec23a	0.106606	0.373992	0.326541	0.28275	0.354278	0.253487	-0.0125638	-0.0322666	0.497195	0.279632	0.467564	0.35346	0.349424	0.29989	0.0367215	-0.140741	-0.0376702	-0.249624	-0.104004	-0.233152	-0.432748	0.298155	-0.0106163	-0.0962792	-0.425283	0.118566
ENSMUSG00000020994	Pnn	0.42378	0.26694	0.185777	0.263217	0.437647	0.129793	0.0770813	-0.0317248	0.103914	0.0997844	-0.075851	-0.244912	0.184714	-0.0597554	-0.18729	0.125204	0.271027	0.0911649	0.06617	-0.375825	-0.157488	-0.17889	-0.288026	0.0477305	-0.193006	0.0605872
ENSMUSG00000021000	Mia2	0.404322	0.26433	0.472732	0.374084	0.105868	0.299878	0.663645	0.453655	0.0209055	0.407967	0.245895	0.406577	0.197714	0.387962	0.427429	-0.487889	-0.460851	-0.319308	-0.313484	-0.0728682	-0.176217	-0.47953	-0.231025	-0.42989	-0.452032	0.10006
ENSMUSG00000021003	Galc	0.127846	0.105707	-0.0151265	-0.225706	-0.123148	-0.167496	0.0229138	0.297628	-0.00125775	0.245858	0.277978	0.507414	0.229712	0.158818	0.446909	-0.176098	0.139364	-0.113324	0.232893	0.0793021	0.247673	0.0348659	0.256406	-0.0526873	-0.140457	0.335281
ENSMUSG00000021012	Zc3h14	-0.126063	0.174058	-0.234107	-0.228094	-0.28424	0.322521	0.0460197	0.0795929	0.375888	-0.290945	-0.0231822	0.347043	-0.110632	0.382198	0.386918	-0.0357129	-0.355054	0.109225	0.015075	0.161545	0.0387721	0.444568	0.536083	0.212162	0.36878	-0.068433
ENSMUSG00000021013	Ttc8	0.165935	0.265754	0.017047	-0.027097	-0.0410354	0.400162	0.516731	0.347659	0.272196	-0.0649629	0.0324407	0.375974	0.0572177	0.461633	0.655596	-0.309961	-0.473156	-0.0214979	0.0135184	0.0639199	0.067547	0.13787	0.338239	-0.028514	0.104747	-0.135106
ENSMUSG00000021022	Ppp2r3c	0.023368	0.549232	-0.186452	0.271721	0.290543	0.381784	0.0890407	-0.0663	0.433827	0.0453163	0.176874	0.100631	0.554504	0.654467	0.364668	0.0671088	-0.282189	-0.18748	-0.364483	-0.339205	-0.364265	0.363212	0.392865	0.222686	-0.0289112	-0.388948
ENSMUSG00000021024	Psma6	0.397811	0.534524	0.183829	0.318858	0.0452442	0.200885	0.340703	0.410225	-0.118653	0.525062	0.120129	0.418305	0.209823	0.547219	0.515826	-0.276138	-0.309676	-0.53546	-0.287113	-0.328457	-0.185975	-0.534945	-0.0300007	-0.417911	-0.582711	0.00820438
ENSMUSG00000021027	Ralgapa1	-0.247185	0.16449	-0.608132	-0.0451029	-0.121722	0.248638	-0.0515079	-0.231727	-0.0130832	-0.0985309	-0.14782	-0.240035	0.0246946	0.368161	0.19576	0.353613	-0.236085	0.0695793	-0.294204	0.0633363	0.119665	0.360523	0.585526	0.317571	0.283257	-0.524724
ENSMUSG00000021028	Mbip	-0.586468	-0.0702984	-0.222718	-0.0586204	-0.335336	-0.0716017	-0.215975	-0.320134	0.107823	0.0123388	0.423242	0.292345	0.114257	0.203072	-0.0978143	-0.0030653	-0.192231	-0.176998	-0.230711	0.425466	-0.197763	0.51753	0.504379	0.105008	0.186985	0.112637
ENSMUSG00000021036	Sptlc2	0.270686	0.177744	0.101154	0.270342	0.0610165	-0.0042458	0.0599027	0.108339	-0.166067	0.535412	0.104307	0.0439957	0.174079	0.047229	-0.119351	-0.000197575	0.0603576	-0.176819	-0.0937182	-0.0404775	-0.0626572	-0.266689	-0.115835	-0.0484231	-0.365666	0.29718
ENSMUSG00000021038	Vipas39	0.00745618	-0.335468	-0.0986618	-0.383828	-0.196733	0.186515	0.323297	0.174041	-0.409501	-0.302344	-0.165164	-0.158668	-0.0514594	-0.243296	0.236364	-0.0699688	-0.0867488	0.336637	0.325989	0.299446	0.66907	0.056076	0.187519	-0.0193917	0.106626	-0.429048
ENSMUSG00000021039	Snw1	-0.27993	-0.128579	-0.585628	-0.300122	-0.01926	0.0392225	-0.217478	-0.284347	-0.0574618	-0.253539	-0.290476	-0.479049	0.0353504	-0.0099387	0.00104255	0.266854	0.0157714	0.0224405	-0.114065	-0.100337	0.0619094	0.226141	0.193273	0.365594	0.194296	-0.53669
ENSMUSG00000021040	Slirp	0.205012	-0.0195651	0.149124	0.401307	0.327271	-0.275756	-0.0459937	-0.295571	-0.161181	0.13186	-0.0144012	-0.444899	-0.281581	-0.315215	-0.483426	0.491074	0.510739	0.23345	-0.00786022	-0.11345	0.143995	-0.292039	-0.34386	-0.288838	-0.071747	0.105531
ENSMUSG00000021044	Adck1	-0.0598799	-0.285403	-0.0561666	-0.327378	-0.189687	0.252009	0.0213038	0.136297	-0.206417	-0.209291	-0.15332	-0.10485	0.160669	-0.226634	-0.0910471	0.120479	-0.070075	0.509061	0.150652	0.466061	0.489816	0.207719	0.188924	0.417732	0.430651	-0.184529
ENSMUSG00000021047	Nova1	0.149638	0.267932	-0.0693416	-0.147511	-0.0122255	0.462891	0.41209	0.224149	-0.0639963	-0.00490086	0.00573585	0.183224	0.34261	0.393463	0.556954	-0.302011	-0.441735	-0.139633	-0.137385	-0.0530928	0.0536625	0.0182866	0.337027	0.124941	-0.122779	-0.377736
ENSMUSG00000021048	Mthfd1	0.341342	0.395175	-0.21787	0.0228329	0.032547	0.185601	0.145901	0.389851	0.0853975	0.53559	-0.0444514	0.261474	0.344017	0.550639	0.404788	0.0612116	-0.0742436	-0.388417	-0.366778	-0.250314	0.0510212	-0.370884	0.106777	0.289924	-0.0579482	0.0819286
ENSMUSG00000021051	Ppp2r5e	0.0553339	-0.020242	-0.20207	-0.316806	0.0464288	0.213262	0.121705	0.16897	0.130239	-0.191011	-0.145405	0.0206303	0.241383	0.0989011	0.177415	-0.0480249	0.0169277	0.10301	0.0949514	-0.0246311	0.0376455	0.110863	0.040022	0.345399	0.121356	-0.121824
ENSMUSG00000021057	Akap5	-0.0482385	0.434126	-0.222761	0.351409	0.216866	0.135311	-0.0212194	-0.376936	0.0445935	0.102977	0.115036	-0.217527	0.223147	0.393871	0.0828621	0.243407	-0.194723	-0.146492	-0.534863	-0.241128	-0.335769	0.0712758	0.260104	-0.0642527	-0.142969	-0.365617
ENSMUSG00000021062	Rab15	0.271494	0.489112	0.184993	0.21983	0.352177	0.473357	0.283952	0.257941	0.354688	0.457394	0.429079	0.457567	0.771311	0.540243	0.381795	-0.128498	-0.191705	-0.157076	-0.219282	-0.0615632	-0.146152	0.277296	0.275591	0.333162	-0.258583	0.0037448
ENSMUSG00000021068	Nin	0.171544	0.111753	0.0602273	-0.311158	-0.200944	0.00856452	-0.0256826	0.336865	0.0504268	0.326436	0.208137	0.5394	0.212519	0.117914	0.301377	-0.311413	-0.0118016	-0.209141	0.272211	0.0946799	0.0707891	0.0290156	0.130404	-0.0318286	-0.339936	0.39118
ENSMUSG00000021069	Pygl	-0.0717714	-0.369418	0.271178	-0.0608476	-0.114275	0.0505065	0.186991	-0.0382516	-0.387801	-0.194721	-0.116498	-0.23113	-0.225139	-0.48377	-0.328557	-0.0823898	0.0234227	0.406033	0.425521	0.457055	0.185444	-0.00277234	-0.205827	-0.176576	-0.0361634	-0.0642082
ENSMUSG00000021071	Trim9	0.330298	0.792578	-0.0930824	0.276127	0.276915	-0.0534335	-0.0719313	-0.080361	0.550655	0.338978	0.227499	0.29215	0.467413	0.645201	0.273184	0.251603	0.176687	-0.276757	-0.182612	-0.414649	-0.39771	-0.0283488	0.281609	0.136965	0.0556358	0.308223
ENSMUSG00000021079	Timm9	-0.412551	-0.308364	0.0133866	-0.205746	-0.256105	-0.312157	-0.3032	-0.223232	-0.219977	-0.0728781	0.294426	0.192916	-0.191417	-0.30223	-0.183351	-0.127308	0.113394	0.00421971	0.156471	0.347543	0.0486721	0.298839	0.157732	-0.160483	-0.110225	0.247297
ENSMUSG00000021087	Rtn1	-0.382889	0.204158	-0.392031	0.213488	-0.265311	0.138531	-0.126149	-0.168473	-0.0712537	0.168491	0.0733035	0.078489	0.0132773	0.505958	0.0992102	0.115905	-0.520084	-0.322472	-0.697683	0.0926133	-0.239174	0.127224	0.44228	0.0337021	0.0661499	-0.27499
ENSMUSG00000021091	Serpina3n	0.0548103	0.418305	-0.130271	0.097869	-0.0871752	0.271137	0.00346576	0.157701	0.28127	0.0108943	0.0530905	0.315397	0.258094	0.527626	0.428118	0.0499241	-0.334822	-0.0358053	-0.258369	-0.077336	-0.0578829	0.170123	0.447027	0.18632	0.248181	-0.101433
ENSMUSG00000021098	4930447C04Rik	-0.106266	0.224112	0.0394461	0.179939	0.124977	0.241327	0.0931169	0.0593906	0.313039	0.283763	0.392125	0.277401	0.617607	0.42537	0.18202	-0.17453	-0.257535	-0.368394	-0.219449	-0.0778667	-0.18383	0.355943	0.320549	0.247453	-0.0300333	-0.14479
ENSMUSG00000021099	Six6	0.233002	0.380699	0.165553	0.59921	0.437958	-0.37461	-0.0460953	-0.115107	0.386952	0.179679	0.113146	-0.0643461	0.207035	0.159753	-0.0948057	0.340503	0.400568	-0.00126134	0.0176212	-0.338726	-0.213551	-0.0807351	-0.0705456	0.0423168	0.305332	0.302679
ENSMUSG00000021102	Glrx5	0.326726	-0.20561	0.307866	-0.344672	-0.199234	0.4458	0.459062	0.780527	-0.215356	0.334627	0.0982496	0.536715	0.347496	0.0227324	0.300276	-0.58257	-0.290221	-0.164264	0.0277984	0.226997	0.31543	-0.330497	-0.218043	0.0957035	-0.37497	0.187931
ENSMUSG00000021108	Prkch	0.241405	0.0183543	0.234364	0.159576	0.185937	0.339581	0.444794	0.366717	0.170386	-0.00723842	-0.067754	0.0167447	0.371166	0.15356	0.147352	-0.113088	-0.279834	0.202836	-0.188761	0.0895123	0.0834509	-0.128952	-0.120664	0.273277	0.375849	-0.113435
ENSMUSG00000021109	Hif1a	-0.068326	-0.332698	-0.0616344	-0.197225	-0.136476	-0.214926	0.0552732	0.0833029	-0.248143	-0.165356	-0.241419	-0.193177	-0.240243	-0.316694	-0.0197484	-0.0504486	0.168607	0.112308	0.507302	0.0925704	0.383111	0.0154356	-0.0126642	0.0248874	0.142584	-0.108997
ENSMUSG00000021111	Papola	-0.235729	-0.197959	-0.387099	-0.399255	-0.45591	-0.119597	-0.251709	0.260373	0.0969294	0.403906	0.136957	0.369206	0.274888	0.224566	0.0455902	-0.078298	-0.068633	-0.463707	-0.234962	0.195045	0.14665	-0.00473721	0.214982	0.39089	0.247384	0.331546
ENSMUSG00000021113	Snapc1	0.206129	-0.425926	0.620008	-0.0475478	0.105258	0.334345	0.50156	0.309467	-0.187897	-0.221283	0.0262286	0.0295152	0.0056893	-0.470648	-0.192922	-0.516503	-0.137033	0.28246	0.302778	0.206363	0.109233	-0.0931994	-0.510821	-0.144244	-0.322899	0.0102357
ENSMUSG00000021115	Vrk1	0.170897	0.107825	0.116831	0.0740392	0.149699	-0.218803	0.0980088	-0.230958	-0.300568	-0.170697	-0.15286	-0.361808	-0.00842398	-0.248806	-0.147477	0.104868	0.325396	0.207504	0.547725	-0.0987212	0.0245347	-0.124865	-0.0721342	-0.285896	-0.153565	-0.146553
ENSMUSG00000021120	Pigh	0.0492499	0.509206	-0.224662	0.222575	0.258773	-0.0704133	0.0339044	-0.0520742	0.705778	0.261136	0.284491	0.262218	0.380716	0.695009	0.387088	0.150708	0.0576257	-0.436155	-0.277539	-0.383087	-0.284967	0.16404	0.323363	0.191941	0.247124	0.0828963
ENSMUSG00000021127	Zfp36l1	-0.45331	-0.300064	-0.225226	-0.0558138	-0.16971	-0.370476	-0.206979	-0.324664	-0.198941	-0.340892	-0.118073	-0.262084	-0.304518	-0.227301	-0.233912	0.257772	0.213779	0.186765	0.156239	0.23147	0.152161	0.198826	0.176859	0.0788008	0.478172	-0.121974
ENSMUSG00000021130	Galnt16	-0.306452	0.365341	-0.474362	0.0930941	-0.173971	-0.0353976	-0.237703	-0.260059	0.0449039	0.219055	0.0924526	0.0874118	0.0527774	0.462495	0.232866	0.239527	-0.163918	-0.277139	-0.0896567	0.0290586	-0.0860011	0.43506	0.700283	0.123957	0.0149819	-0.22797
ENSMUSG00000021131	Erh	0.473771	0.173587	0.0441991	0.0483415	0.277221	-0.19452	0.0494419	0.0758298	0.0729145	-0.172894	-0.432425	-0.301495	-0.163894	-0.238593	0.0457578	0.134934	0.38015	0.277726	0.571852	-0.365231	0.0778601	-0.184888	-0.223131	0.0430758	0.0448717	0.114255
ENSMUSG00000021140	Pcnx	-0.244051	-0.156524	-0.279451	0.200529	-0.227012	-0.0691434	0.0431585	-0.0671837	-0.163462	0.223426	0.0718145	-0.123507	-0.101897	0.152791	-0.161234	0.277801	-0.0980538	-0.116599	-0.396562	0.237958	0.239142	-0.0817734	0.175808	-0.0630761	0.28795	-0.0887379
ENSMUSG00000021177	Tdp1	-0.0408015	-0.272087	-0.0150465	-0.222896	-0.0423547	0.174937	0.0339643	-0.0235608	-0.385016	-0.227789	-0.316414	-0.395042	0.180495	-0.371053	-0.190339	-0.0808484	-0.046544	0.175637	0.226143	0.0650275	0.117038	0.0163344	-0.0977334	0.374641	-0.0334271	-0.378677
ENSMUSG00000021178	Psmc1	-0.0586729	0.255252	0.176967	0.244373	-0.175433	0.107075	0.435066	0.339223	0.440157	0.457908	0.580607	0.796016	0.325626	0.681388	0.459297	-0.421411	-0.430675	-0.469963	-0.189259	0.263099	-0.221397	0.126834	0.323988	-0.190882	0.0250573	0.378029
ENSMUSG00000021179	Nrde2	0.0536193	-0.0994574	-0.190675	-0.626844	-0.358883	0.208762	0.0330533	0.259238	0.0378933	-0.409354	-0.203684	0.260229	-0.00609581	0.0273915	0.348891	-0.231517	-0.20199	0.255641	0.114408	0.172094	0.181898	0.055201	0.196101	0.293243	0.263702	0.0812906
ENSMUSG00000021185	Dglucy	-0.217796	0.258962	-0.510484	-0.138564	-0.252436	0.095891	-0.128931	-0.133683	-0.0838542	0.108728	0.102336	0.116897	0.162801	0.42069	0.273843	0.319222	-0.0555146	-0.0504686	-0.141607	0.185447	0.185945	0.277412	0.680476	0.146717	0.168895	-0.213205
ENSMUSG00000021188	Trip11	0.225142	0.337269	-0.117794	-0.0756066	-0.124747	0.299058	0.444186	0.329823	-0.0348808	0.171653	-0.0060404	0.293003	0.226387	0.505648	0.510694	-0.249683	-0.336785	-0.237418	-0.0326873	-0.0141951	0.00190777	-0.181128	0.246319	-0.143732	-0.155292	-0.110937
ENSMUSG00000021192	Golga5	0.450343	0.400043	-0.105362	0.00485714	0.0683759	0.294092	0.355976	0.487676	0.227687	0.219236	-0.0480768	0.34985	0.238788	0.559602	0.618816	-0.119774	-0.185716	-0.304183	-0.294328	-0.380698	0.0405896	-0.371496	0.0475188	0.0562849	-0.0894587	0.0173846
ENSMUSG00000021194	Chga	0.274268	0.065211	0.15174	-0.0775	0.101079	0.312505	0.232088	0.213151	0.0599329	-0.0643253	-0.0311373	-5.99625e-05	0.316904	0.101337	0.146959	-0.222151	-0.268591	0.0878064	-0.25371	-0.113331	0.0135392	-0.193562	-0.109357	0.0937547	0.0649288	-0.114077
ENSMUSG00000021198	Unc79	-0.0116114	-0.0384208	-0.180458	0.0815131	0.0357189	0.405763	0.232761	0.103234	-0.0841017	-0.248345	-0.248039	-0.26802	0.0760244	0.08604	0.180144	0.258009	-0.277619	0.360912	-0.160168	0.109875	0.415741	0.202971	0.287565	0.331352	0.407596	-0.613956
ENSMUSG00000021200	Asb2	-0.0949916	-0.227691	0.0103746	0.322148	-0.0661377	-0.349954	0.0785544	-0.174773	-0.159805	0.0707634	-0.0145597	-0.301862	-0.314394	-0.163172	-0.270407	0.344443	0.155714	0.217548	-0.0946093	0.273184	0.265484	-0.19704	-0.0721762	-0.16733	0.408381	0.0919375
ENSMUSG00000021215	Net1	-0.30605	0.163857	-0.23335	-0.0745599	-0.199835	0.152431	-0.304309	-0.297243	-0.0861613	-0.196386	-0.0414168	0.073885	-0.128214	0.118597	-0.0136152	0.112104	-0.211937	0.0807891	-0.163148	0.139269	-0.222265	0.374065	0.416739	0.249524	-0.00277112	-0.126084
ENSMUSG00000021219	Rgs6	0.0910912	0.450993	0.0431266	0.525236	0.122712	-0.232785	-0.0498966	-0.0743058	0.167206	0.613816	0.315868	0.240212	0.112741	0.448077	0.0421652	0.100998	0.0199443	-0.514767	-0.476884	-0.2179	-0.446357	-0.329578	-0.04167	-0.278016	-0.243273	0.379346
ENSMUSG00000021222	Dcaf4	-0.0610539	0.118242	-0.0316543	0.15234	-0.0357159	0.300033	-0.0201497	0.183473	0.104545	0.448644	0.200185	0.208562	0.387639	0.375057	0.0900175	-0.0568117	-0.358595	-0.378687	-0.619632	-0.0114112	-0.18644	-0.0890771	0.00858997	0.151291	-0.132949	-0.076163
ENSMUSG00000021224	Numb	-0.248871	-0.00424467	-0.145793	0.0420881	-0.0614129	0.462369	0.140765	0.163644	0.0640604	0.180148	0.200312	0.196755	0.333193	0.395474	0.160894	-0.207397	-0.490064	-0.440875	-0.440722	-0.0317453	-0.0711852	0.250144	0.220486	0.111944	-0.201468	-0.447453
ENSMUSG00000021226	Acot2	-0.323887	-0.452468	-0.0557463	-0.390114	-0.318458	0.275143	-0.0378792	0.186929	-0.0970254	-0.131525	0.0313022	0.183303	-0.134661	-0.145823	0.128464	-0.336576	-0.412539	0.0395471	-0.042131	0.343458	0.226813	0.372597	0.109603	0.146561	-0.11173	-0.212908
ENSMUSG00000021234	Fam161b	-0.267727	-0.116005	-0.0688077	-0.183628	-0.335918	-0.00887689	-0.362543	-0.1774	-0.102676	-0.233274	-0.118056	-0.00425154	-0.285654	-0.126088	-0.120407	-0.0525482	-0.252628	0.139085	-0.109334	0.177638	-0.0910694	0.161155	0.145684	0.0798285	0.145593	0.00800189
ENSMUSG00000021241	Isca2	0.281137	0.30789	-0.141607	-0.137073	0.195955	-0.17707	-0.0850364	-0.0752368	0.211864	0.0739442	0.0349318	0.0363985	0.126505	0.0599317	0.118844	0.264248	0.501332	0.176204	0.501165	-0.116768	0.120174	0.179502	0.192868	0.0578198	-0.0398017	0.22848
ENSMUSG00000021243	Fcf1	0.124937	0.517757	0.00747889	0.254042	0.131785	-0.148187	0.0926815	0.117941	0.566985	0.356453	0.398015	0.495919	0.421728	0.646543	0.427876	-0.0789597	-0.00208087	-0.35933	-0.0850249	-0.194932	-0.297615	0.0902343	0.293409	-0.0425829	0.114356	0.344941
ENSMUSG00000021250	Fos	-0.0401655	0.13822	-0.126147	0.0256017	-0.0281102	-0.197442	-0.251287	-0.21491	0.298432	0.0484567	0.159107	0.166617	-0.328119	0.0667894	-0.055415	0.274163	0.314547	-0.0378748	0.0247528	-0.0429005	-0.0493888	0.128132	0.125337	-0.0907843	0.0665439	0.38967
ENSMUSG00000021253	Tgfb3	-0.0744635	-0.0114704	-0.0108187	0.0954992	0.0386811	0.570555	0.335767	0.0638754	-0.0923048	-0.322976	-0.136826	-0.151914	0.0366919	0.107716	0.223832	0.0670793	-0.478768	0.409286	-0.192768	0.237312	0.257091	0.307115	0.298618	0.193555	0.246882	-0.656581
ENSMUSG00000021259	Cyp46a1	-0.180618	0.053176	-0.400912	-0.44581	-0.269886	0.0505257	-0.112601	-0.175866	-0.228874	-0.183961	-0.0141979	0.00156246	0.193884	0.0740993	0.230689	-0.00679985	-0.0672732	0.0348481	0.100279	0.145459	0.124895	0.252144	0.514666	0.223889	0.0301727	-0.209963
ENSMUSG00000021262	Evl	0.0533805	0.0501374	-0.565491	-0.531356	-0.125008	-0.234146	-0.584617	-0.118286	-0.127058	-0.157412	-0.476095	-0.247004	-0.108599	-0.195686	-0.122039	0.472141	0.547593	0.138903	0.407826	-0.214075	0.234243	0.0368056	0.145581	0.441756	0.126628	0.0246834
ENSMUSG00000021275	Tecpr2	0.125774	0.462489	-0.214313	0.134794	-0.0906307	-0.0645054	0.0314095	-0.172467	0.0809398	-0.0229803	-0.100589	0.00243962	-0.143845	0.372501	0.247213	0.189815	-0.152188	0.141396	-0.0596211	0.0067448	-0.113938	0.00684344	0.389874	-0.132253	0.184697	0.0413884
ENSMUSG00000021280	Exoc3l4	0.164027	0.137108	0.387035	0.112151	0.0308505	0.00999938	0.2764	0.105171	0.0390484	0.253065	0.331056	0.345589	0.00887232	0.0159464	0.158896	-0.418033	-0.078779	-0.182939	0.348121	0.0803884	-0.121365	0.0438288	-0.0105657	-0.443752	-0.495669	0.276829
ENSMUSG00000021286	Zfyve21	0.647294	0.737697	0.274931	0.278121	0.606086	0.378518	0.0738021	0.16211	0.313708	0.110692	-0.0820574	0.0670311	0.431034	0.34727	0.266243	0.048685	0.0686558	-0.034623	-0.158127	-0.702066	-0.403309	-0.271673	-0.226722	0.0649834	-0.372324	-0.0812122
ENSMUSG00000021301	Hecw1	-0.357123	0.165778	-0.0847906	0.172451	-0.0821374	0.0993479	0.0805073	-0.294323	-0.0559766	-0.077548	0.263837	0.099209	-0.0955682	0.270067	0.162354	0.0322815	-0.210762	-0.0427411	-0.13157	0.216138	-0.168913	0.315607	0.401466	-0.307558	-0.0703427	-0.257087
ENSMUSG00000021302	Ggps1	-0.350253	-0.3746	-0.246065	-0.236079	-0.186577	-0.0264911	0.0208809	0.161341	0.136463	0.0286318	0.111377	0.181427	0.0514075	0.00831956	0.092384	-0.0703092	0.0209483	-0.207333	0.0983194	0.212377	0.28464	0.352976	0.21551	0.372187	0.275013	-0.0151637
ENSMUSG00000021306	Gpr137b	0.409837	0.176261	0.258493	0.11387	0.455359	-0.23495	0.0904602	0.00474234	0.436037	0.00107879	0.0938081	0.0167737	-0.0868359	-0.0380648	0.0607128	0.063727	0.499202	-0.0359755	0.19069	-0.464911	-0.0912393	-0.266102	-0.406623	-0.269953	-0.0884346	0.315797
ENSMUSG00000021314	Amph	0.00346006	0.373382	0.0861391	0.0953013	0.125854	0.167803	-0.0359827	-0.124619	0.487823	-0.0916115	0.236858	0.229939	0.124479	0.324904	0.207063	-0.119716	-0.218454	-0.0351602	-0.0590204	-0.129126	-0.365379	0.337302	0.225466	-0.164361	-0.00998439	0.0116783
ENSMUSG00000021322	Aoah	0.544304	0.26764	0.0501164	-0.023065	0.414771	0.398147	0.119568	0.263673	-0.256688	-0.02097	-0.415772	-0.322791	0.365514	-0.0569224	0.208141	0.171866	0.160323	0.160445	0.113721	-0.51364	0.243854	-0.289229	-0.18513	0.331354	-0.300368	-0.535128
ENSMUSG00000021357	Exoc2	-0.0291497	-0.135578	-0.0119495	-0.248482	-0.18459	0.28233	0.348416	0.343326	0.373032	0.00941916	0.114578	0.396848	0.127874	0.236115	0.280594	-0.370826	-0.345508	-0.120273	0.0168179	0.240322	0.107824	0.232401	0.190828	0.319073	0.279154	0.138336
ENSMUSG00000021365	Nedd9	0.289659	0.0721911	0.638075	0.238911	0.299337	0.290034	0.361639	0.0719379	0.127495	0.0105687	0.252788	0.148818	0.163621	-0.133023	-0.199345	-0.419653	-0.0732313	0.0993843	0.164978	-0.00275021	-0.403551	-0.041971	-0.433435	-0.310687	-0.51439	0.233733
ENSMUSG00000021366	Hivep1	-0.359272	-0.0865226	-0.151051	-0.0283417	-0.357452	0.612653	0.22275	0.174962	0.0214442	-0.0235263	0.0838477	0.278812	-0.0468809	0.369032	0.253494	-0.232795	-0.819557	-0.0719409	-0.437133	0.418865	0.0346064	0.404068	0.423491	0.111599	0.0646307	-0.395334
ENSMUSG00000021371	Mcur1	0.474427	0.324739	-0.0956012	-0.19625	0.293281	0.119207	0.159247	0.155171	-0.073923	0.0358136	-0.115453	-0.0798641	0.349782	0.107129	0.466282	0.123917	0.21878	0.179253	0.158343	-0.280808	0.302392	-0.14646	0.115426	0.138494	-0.144516	-0.207384
ENSMUSG00000021373	Cap2	-0.0153158	-0.0742404	-0.152175	0.0710806	0.117774	0.214378	-0.254719	-0.250306	-0.255792	-0.16877	-0.340673	-0.516199	-0.31751	-0.293759	-0.406862	0.647036	0.228092	0.487576	-0.0936908	0.0631989	0.305978	0.0551398	-0.0354029	0.225047	0.158759	-0.357105
ENSMUSG00000021374	Nup153	0.344742	0.0726704	0.207027	-0.307662	0.0617902	0.446317	0.191096	0.253717	-0.235104	-0.37545	-0.302679	-0.00281101	0.13574	-0.242606	0.215865	-0.108861	-0.0514855	0.617687	0.553544	0.133175	0.300241	0.169375	0.0901641	0.273561	-0.110537	-0.246972
ENSMUSG00000021375	Kif13a	-0.0543115	-0.201351	-0.387117	-0.362369	-0.392522	0.113569	-0.111638	0.204354	-0.29092	-0.0970796	-0.50925	-0.152277	-0.125253	-0.0814657	-0.0375	0.212529	-0.0541445	0.103088	0.0431083	0.169924	0.453752	-0.11734	0.199894	0.602584	0.504944	-0.147086
ENSMUSG00000021379	Id4	-0.167625	0.33252	-0.439921	0.196971	0.153461	-0.0612721	-0.0752554	-0.223201	0.0705768	0.32337	0.222113	-0.0875056	0.472981	0.453886	0.232681	0.420025	0.102248	-0.211342	-0.160523	-0.0790267	0.138158	0.373546	0.619797	0.265057	0.131319	-0.373524
ENSMUSG00000021384	Susd3	0.636667	0.472076	0.27343	0.36128	0.386651	0.0427124	0.295037	0.342133	0.0775803	0.433578	-0.0765295	0.121139	0.238894	0.227537	0.221882	0.0302903	0.189501	-0.128692	0.0796158	-0.387469	-0.0474612	-0.446511	-0.226177	0.0415615	-0.256558	0.218762
ENSMUSG00000021385	Ippk	0.228061	0.271191	0.0235459	0.111599	0.369682	0.0646607	0.236755	-0.259959	0.00917849	-0.242259	0.0687511	-0.229323	0.124158	0.0509685	0.149508	0.178732	0.238373	0.205312	0.125056	-0.262946	0.0158818	0.0330331	0.0742537	-0.198619	-0.171554	-0.297429
ENSMUSG00000021388	Aspn	-0.077664	-0.00199537	0.000378787	-0.16899	-0.0135675	0.292322	-0.061962	-0.135221	-0.143302	-0.562605	-0.289997	-0.144665	-0.221373	-0.228173	0.0490322	0.0216701	-0.177325	0.545484	0.251428	0.162199	0.0350206	0.402764	0.2067	0.206544	0.0532815	-0.33206
ENSMUSG00000021392	Nol8	0.125637	0.246531	-0.0539341	-0.12717	-0.165231	-0.0578992	-0.0246203	0.0325142	0.0895393	0.0358659	-0.0200949	0.201261	-0.0569342	0.0573514	0.235782	0.0074061	0.0138128	0.261984	0.523444	0.262019	0.132642	0.305269	0.426577	0.0508058	0.121752	0.268894
ENSMUSG00000021400	Wrnip1	0.296418	0.449907	0.248281	0.442162	0.552087	-0.280732	-0.139547	-0.236552	0.487764	-0.0489274	0.175955	-0.0383989	0.10865	0.141771	-0.0579335	0.124869	0.337226	-0.072381	-0.128861	-0.641368	-0.576888	-0.166955	-0.352667	-0.388083	-0.187863	0.241599
ENSMUSG00000021411	Pxdc1	0.483502	0.00531132	0.167211	0.0281173	0.0160315	0.29907	0.576584	0.582979	0.0370535	0.272691	-0.0524992	0.217047	0.154174	0.128679	0.276311	-0.0626754	-0.0842603	0.186719	0.100835	0.20403	0.524468	-0.226917	-0.00184925	0.225864	0.199375	0.172746
ENSMUSG00000021417	Eci2	0.119489	0.350139	-0.0709824	0.150028	0.0917274	-0.0508382	-0.0491306	0.130508	0.489119	0.267122	0.115612	0.256823	0.231365	0.432158	0.228879	-0.156485	-0.0569798	-0.485374	-0.123761	-0.411438	-0.431038	-0.0498666	-0.0186653	-0.0295855	-0.0920275	0.235077
ENSMUSG00000021420	Fars2	-0.149263	-0.504853	0.0832074	-0.211976	-0.236384	-0.0315401	0.334071	0.182209	-0.38001	0.152493	0.173736	0.0628025	-0.0279418	-0.220495	-0.0827253	-0.161536	0.0160206	-0.0163057	0.108894	0.498934	0.487985	-0.126448	-0.0618824	-0.138447	0.00386165	0.00666619
ENSMUSG00000021423	Ly86	0.636735	0.33549	0.595464	0.345758	0.520702	0.166634	0.588951	0.435554	0.342953	0.264434	0.209508	0.272608	0.371319	0.2002	0.360835	-0.455602	0.011576	-0.282147	0.0839287	-0.490429	-0.269276	-0.431466	-0.490876	-0.342757	-0.459596	0.203579
ENSMUSG00000021428	Riok1	0.109448	0.342987	0.0533898	0.239788	0.339563	-0.150399	-0.362815	-0.258605	0.288001	0.13323	0.0270564	-0.0595934	0.0440163	0.0332741	-0.208075	0.205064	0.383145	-0.182367	0.0250939	-0.464453	-0.464381	0.0172682	-0.168211	0.115645	-0.217	0.220945
ENSMUSG00000021453	Gadd45g	-0.230971	-0.504894	0.159903	-0.121052	-0.143281	0.346495	-0.0795953	0.0722428	-0.302339	0.0786348	0.0759582	-0.0093381	-0.0667085	-0.399672	-0.456327	-0.0825364	-0.0894421	0.0587569	-0.0933237	0.344317	0.162778	0.155424	-0.234121	0.176916	-0.325783	-0.0840902
ENSMUSG00000021458	2010111I01Rik	-0.0496668	0.0535832	-0.486447	-0.274734	-0.205267	0.248257	-0.285678	0.126108	-0.192833	0.17277	-0.203992	0.0331804	0.111582	0.0994723	0.0811751	0.304401	0.0480066	-0.0050775	0.0805257	0.0446129	0.382532	0.319066	0.447714	0.59172	-0.0556374	-0.215771
ENSMUSG00000021460	Auh	0.12973	0.411285	0.156791	0.421909	0.330482	-0.301752	-0.203122	-0.386389	0.0876981	0.32653	0.252381	-0.0462434	-0.0694387	0.0890455	-0.230382	0.320449	0.403346	-0.187108	-0.178882	-0.27232	-0.346611	-0.240741	-0.133563	-0.349762	-0.239232	0.300803
ENSMUSG00000021470	Ercc6l2	-0.00523227	-0.110294	0.198271	-0.144521	0.209722	-0.0685169	-0.226741	-0.331533	0.0472137	-0.48179	-0.0853088	-0.259843	-0.251172	-0.52661	-0.319225	0.174377	0.41411	0.517294	0.628534	0.020503	0.0777609	0.38751	-0.0724639	-0.0369866	0.00428702	-0.0426753
ENSMUSG00000021474	Sfxn1	-0.356809	-0.0994169	-0.263104	-0.288697	-0.482836	0.278297	0.0114633	0.186355	-0.0511925	0.21407	0.284498	0.524921	0.0584056	0.322355	0.321624	-0.152532	-0.447151	-0.12324	-0.213906	0.553131	0.304506	0.454141	0.649605	0.251064	0.106338	-0.00161469
ENSMUSG00000021478	Drd1	-0.502113	-0.352108	-0.0125107	-0.00884469	-0.363511	-0.0965688	-0.0164922	-0.189144	-0.0555261	-0.127696	0.247739	0.0758634	-0.135545	-0.0864086	-0.265879	-0.133281	-0.245893	0.13271	-0.0199005	0.589754	-0.00689432	0.37824	0.235305	-0.126099	0.308748	0.110034
ENSMUSG00000021481	Zfp346	0.0644178	0.0570345	0.0748056	-0.337761	-0.366076	-0.0587952	-0.0697261	0.312371	0.0527922	0.187143	0.132704	0.592947	-0.0219458	0.134631	0.290713	-0.29718	-0.0796701	-0.184263	0.0508071	0.189398	-0.0486091	-0.206995	0.0263373	-0.0920308	-0.0824838	0.530903
ENSMUSG00000021488	Nsd1	0.195974	0.330076	0.249345	0.0990355	0.14462	0.00238883	0.251232	0.0238043	0.572944	0.0052582	0.415735	0.455561	0.183423	0.346121	0.28726	-0.15177	-0.0351672	0.058344	0.0842239	0.0451467	-0.170521	0.210145	0.189957	-0.189967	0.114523	0.367749
ENSMUSG00000021493	Pdlim7	0.180737	0.39135	-0.0299982	0.0949477	-0.0583507	0.204744	0.465007	0.286856	0.0145907	0.207439	0.254529	0.432174	0.314217	0.556465	0.755339	-0.17102	-0.315263	-0.108012	-0.0141261	0.0777214	0.206803	0.0851973	0.534239	-0.127589	-0.0931681	-0.141847
ENSMUSG00000021496	Pcbd2	0.549406	0.256163	0.572778	0.15709	0.279126	0.095932	0.249328	0.500988	0.256595	0.532852	0.314388	0.517682	0.397351	0.109304	0.129269	-0.359638	0.0741596	-0.154782	0.122792	-0.100956	-0.0910955	-0.276305	-0.322227	-0.115728	-0.350079	0.587476
ENSMUSG00000021508	Cxcl14	-0.376069	0.0290861	-0.0916821	0.270302	-0.00810072	-0.00729375	-0.0508514	-0.343296	0.47512	0.140316	0.530944	0.166828	0.141408	0.343061	-0.195036	0.148936	-0.122626	-0.112846	-0.491118	0.253721	-0.270496	0.421334	0.281665	0.0297451	0.309932	0.180769
ENSMUSG00000021518	Ptdss1	-0.0227237	0.0508221	-0.279669	-0.313195	-0.361125	0.186133	0.174396	0.215668	-0.103486	-0.209125	-0.151103	0.180841	0.0340623	0.252963	0.568669	-0.0800094	-0.409173	0.277575	0.0287742	0.310213	0.37084	0.197593	0.562286	0.233069	0.349452	-0.218566
ENSMUSG00000021519	Mterf3	-0.0233616	-0.132464	-0.104876	0.0458402	0.0298028	-0.264178	-0.0568446	-0.0165255	0.19776	0.349615	0.183184	0.0395067	0.0562433	-0.0400629	-0.171133	0.302115	0.357633	0.126927	0.154789	0.302353	0.348713	0.252349	0.185462	0.379018	0.387229	0.395283
ENSMUSG00000021532	Fastkd3	-0.0923908	0.0046811	-0.0192762	0.0905477	-0.00703702	-0.600035	-0.230494	-0.358136	0.136806	-0.065676	0.00740206	-0.104392	-0.498709	-0.191002	-0.296454	0.238154	0.530135	-0.00385241	0.357826	-0.0246613	-0.17601	-0.103638	-0.144664	-0.372205	0.161391	0.476525
ENSMUSG00000021546	Hnrnpk	0.540699	0.4724	0.324316	0.066061	0.0612121	0.417625	0.175874	0.353492	-0.0768786	-0.138243	-0.304977	0.218217	-0.0818187	0.142287	0.279833	-0.230089	-0.229739	0.139167	0.128877	-0.312272	-0.190554	-0.351356	-0.158581	-0.194711	-0.348007	0.0104946
ENSMUSG00000021548	Ccnh	0.392056	-0.0494899	0.137535	-0.321286	-0.0944467	0.300394	0.0268928	0.373269	-0.328472	0.0969495	-0.217001	0.0609216	0.202987	-0.172376	-0.017854	-0.164535	-0.06507	0.0732657	-0.0139109	-0.0619336	0.233223	-0.386795	-0.234617	0.212264	-0.279284	0.0338886
ENSMUSG00000021549	Rasa1	0.0193288	-0.367549	0.438617	0.0407747	-0.0474092	0.0261843	0.302599	0.360099	0.075729	0.451995	0.505436	0.424838	0.133963	-0.0785395	-0.0511829	-0.461974	-0.129899	-0.118742	-0.0962456	0.397595	0.112716	-0.0485883	-0.288919	-0.223576	-0.227202	0.469078
ENSMUSG00000021550	2210016F16Rik	0.15128	0.0791261	0.292413	0.13421	-0.142649	0.122862	0.504743	0.574664	-0.0560781	0.602442	0.421614	0.697169	0.356629	0.401683	0.489417	-0.49153	-0.342908	-0.416893	-0.229944	0.244938	0.109539	-0.262077	0.0963855	-0.0637759	-0.188625	0.336468
ENSMUSG00000021552	Gkap1	-0.0174568	0.213903	0.076656	0.185598	0.356687	-0.106157	0.32534	-0.164179	0.424955	-0.0550009	0.453097	0.069327	0.398736	0.360406	0.387564	-0.13999	0.00068891	-0.139206	-0.141408	-0.185305	-0.206161	0.154658	0.138168	-0.281917	0.0957726	-0.130097
ENSMUSG00000021557	Agtpbp1	-0.117831	0.432277	-0.0373232	0.356629	0.240891	-0.177302	-0.278644	-0.308706	0.372862	0.261343	0.433922	0.204429	0.328098	0.311884	-0.0472825	0.16741	0.173875	-0.193568	-0.0544316	-0.145252	-0.392144	0.445685	0.343268	0.0277571	-0.0783681	0.228606
ENSMUSG00000021559	Dapk1	-0.554929	0.00415624	-0.577578	-0.135379	-0.446709	-0.0271879	-0.190301	-0.223327	0.243378	0.110244	0.269077	0.244412	0.0704348	0.501868	0.110772	0.154686	-0.285431	-0.286187	-0.433505	0.335914	-0.0426881	0.438803	0.670901	0.256932	0.441843	7.57038e-05
ENSMUSG00000021573	Tppp	0.295238	0.712006	-0.0247462	0.39488	0.349047	-0.202897	0.044728	-0.165709	0.350714	0.230979	0.294207	0.158497	0.245459	0.502531	0.417346	0.260486	0.250989	-0.0962509	0.0672922	-0.370839	-0.157149	0.0765353	0.347389	-0.282576	-0.10061	0.0901466
ENSMUSG00000021576	Pdcd6	-0.31955	-0.0571822	-0.457948	-0.284218	-0.25781	-0.288009	-0.387712	-0.167829	-0.387449	0.0639558	-0.205816	-0.152912	-0.0284464	-0.0683511	0.0117474	0.153842	0.143381	-0.206994	0.23582	0.0212144	0.162344	0.157248	0.364254	0.258627	-0.00062755	-0.218536
ENSMUSG00000021583	Erap1	-0.250025	-0.328085	-0.177855	-0.138598	-0.0272218	0.222312	0.0831437	-0.109239	0.0113901	-0.241474	-0.0763894	-0.338178	0.166038	-0.0570141	-0.116284	-0.0251915	-0.296807	0.0619259	-0.335652	0.0993938	0.0201937	0.119522	-0.0492367	0.205354	0.21749	-0.467365
ENSMUSG00000021585	Cast	-0.133324	0.0786919	-0.133332	0.0491252	0.0163192	-0.0595637	0.105853	-0.202592	0.487841	-0.220341	0.0960423	0.00693777	0.0629602	0.237236	0.0683008	0.195359	0.0400113	0.0786862	0.028646	0.0661083	-0.0113892	0.310634	0.317898	0.267178	0.631664	0.00498284
ENSMUSG00000021591	Glrx	0.0337933	-0.0141911	0.138898	-0.0210124	0.174086	0.455436	0.036942	0.0419817	0.0115701	-0.0151954	0.022866	0.028211	0.0488696	-0.0209618	-0.0610841	-0.0358928	-0.127195	-0.0204346	-0.208229	-0.0849254	-0.113972	0.0673848	-0.202072	0.0784755	-0.425689	-0.270693
ENSMUSG00000021592	Arsk	-0.0835883	0.0135391	-0.482995	-0.330662	-0.298622	0.194997	0.213867	0.0908817	-0.157691	-0.195742	-0.152136	-0.0243031	-0.0377679	0.249017	0.57717	0.0906184	-0.270608	0.22223	0.0758947	0.253449	0.547838	0.264987	0.6524	0.146612	0.318789	-0.45001
ENSMUSG00000021595	Nsun2	0.142566	0.570335	0.253818	0.531618	0.216921	-0.154868	-0.0711269	-0.072245	0.532313	0.538882	0.52308	0.495614	0.14156	0.548098	0.0744188	-0.0377899	-0.000633662	-0.504515	-0.437017	-0.289499	-0.638149	-0.151605	-0.0607769	-0.387002	-0.277242	0.557601
ENSMUSG00000021596	Mctp1	0.0840214	0.271421	0.468141	0.315669	0.4134	0.248821	0.111623	-0.224506	0.367433	-0.253963	0.213627	0.0612597	0.0366445	0.0260232	-0.0739428	-0.0115623	-0.0627352	0.361462	0.018473	0.00390325	-0.36275	0.32973	-0.0473143	-0.108107	-0.0255216	-0.0237987
ENSMUSG00000021597	Slf1	0.0667647	-0.321858	0.16401	-0.0314045	-0.104612	-0.0375771	-0.109842	-0.0366837	-0.185198	0.0378853	-0.13624	-0.170738	-0.471298	-0.459089	-0.455237	0.168828	0.236638	0.230926	0.128788	0.199463	0.199086	-0.203803	-0.373057	-0.0790922	-0.0794101	0.256213
ENSMUSG00000021607	Mrpl36	0.0917022	0.345449	0.0380323	0.287818	0.331705	0.536436	0.436179	-0.0642664	0.249161	-0.0635824	0.169858	-0.0451605	0.268264	0.465875	0.327556	0.0611963	-0.319972	-0.0515274	-0.370814	-0.194257	-0.0804101	0.145513	0.202521	-0.0873049	-0.067375	-0.602075
ENSMUSG00000021614	Vcan	-0.31279	-0.448147	-0.151317	-0.198936	-0.179548	-0.219081	-0.204562	-0.019038	0.13186	-0.0493092	0.0885924	0.0302753	-0.238219	-0.13224	-0.285429	0.0743183	0.102506	-0.0121414	-0.282887	0.221101	0.0898968	-0.0231352	-0.191104	-0.018344	0.350235	0.256183
ENSMUSG00000021615	Xrcc4	0.298097	0.474083	0.132749	0.115724	0.303348	0.255188	0.0792991	0.0669241	0.159389	0.0143851	0.0951711	0.174839	0.304097	0.177004	0.285206	0.0333957	0.061437	0.246512	0.374303	-0.10919	0.000738334	0.38525	0.314297	0.0787225	-0.218914	-0.07624
ENSMUSG00000021621	Zcchc9	-0.0182178	-0.492291	-0.162403	-0.489837	-0.145867	0.125163	0.145562	0.126885	-0.270619	-0.257586	-0.281634	-0.250823	-0.108171	-0.437526	-0.142591	0.0711322	0.172223	0.477155	0.505173	0.407416	0.660652	0.224086	0.0759483	0.407035	0.279167	-0.15665
ENSMUSG00000021629	Slc30a5	-0.535651	-0.568435	-0.148982	-0.350043	-0.479707	0.266364	-0.0623871	-0.00478413	-0.289291	-0.160859	-0.0315652	0.0282768	-0.155684	-0.241163	-0.358222	-0.126503	-0.268349	-0.00545808	0.055369	0.550377	0.187265	0.358191	0.127439	0.241418	0.0445354	-0.217777
ENSMUSG00000021635	Rad17	0.622532	0.530498	0.400953	0.291865	0.409079	0.331942	0.121913	0.217283	0.0575748	0.292618	-0.0287902	0.120555	0.325857	0.135898	0.0716317	0.0111798	0.102326	0.0986487	0.0598445	-0.339427	-0.17571	-0.216966	-0.191234	0.133016	-0.428031	0.132136
ENSMUSG00000021645	Smn1	0.288622	0.550012	0.24169	0.376193	0.239706	0.256228	0.129431	0.0742866	0.292844	0.191485	0.0756352	0.224345	0.150252	0.313688	0.173436	0.0265916	-0.132562	0.0474235	0.0929906	-0.0953107	-0.29875	0.137488	0.120076	-0.052639	-0.189398	0.0877534
ENSMUSG00000021650	Ptcd2	0.401181	-0.185561	0.384142	-0.168443	0.0186087	0.459617	0.40554	0.584091	-0.17838	0.105545	-0.0616939	0.205953	0.175145	-0.17687	0.0680972	-0.186209	0.00537392	0.24782	0.227277	0.195163	0.445734	-0.240142	-0.285834	0.152858	-0.147586	0.0452585
ENSMUSG00000021661	Ankra2	-0.455935	0.15901	-0.470209	-0.086151	-0.328761	-0.0896003	-0.236389	-0.289494	0.298701	0.015993	0.143979	0.17571	-0.00608434	0.396403	0.0905718	0.295936	-0.159612	0.00781406	-0.0407189	0.4185	-0.00660734	0.612369	0.763008	0.283769	0.569533	0.021308
ENSMUSG00000021662	Arhgef28	-0.0690667	-0.156312	-0.102939	-0.218727	0.147589	0.152611	0.0858259	-0.129218	0.00562615	-0.135903	0.0606778	-0.208727	0.336949	-0.133083	-0.0185076	0.205185	0.179903	0.217366	0.153099	0.136121	0.390225	0.348171	0.249745	0.477439	0.258806	-0.342097
ENSMUSG00000021665	Hexb	0.207318	0.0195419	-0.337556	-0.325607	0.157448	-0.218645	-0.288992	-0.163026	-0.116004	-0.547679	-0.680464	-0.562871	-0.288877	-0.360257	-0.0556715	0.444987	0.531756	0.461667	0.474557	-0.352231	0.208816	-0.107742	-0.110127	0.279159	0.287734	-0.204817
ENSMUSG00000021668	Polk	-0.539507	-0.310878	-0.133321	-0.352801	-0.175533	0.120175	-0.105267	-0.140817	-0.00770184	-0.168478	0.282701	0.154163	0.278836	-0.0318249	0.014586	-0.302496	-0.259522	-0.101732	-0.0392593	0.329226	-0.102652	0.579482	0.280473	0.215752	-0.060372	-0.230837
ENSMUSG00000021670	Hmgcr	0.0373275	0.109646	-0.148017	-0.26281	-0.21441	0.254896	0.395324	0.295077	-0.270208	0.187519	0.0554352	0.241685	0.364048	0.26504	0.589686	-0.195923	-0.31348	0.029524	0.265922	0.393155	0.460528	0.224658	0.611876	0.212115	0.0202246	-0.28406
ENSMUSG00000021671	Poc5	-0.229025	-0.456166	0.104343	-0.0248177	-0.322826	-0.0521331	0.264608	0.0966526	-0.528117	0.0511213	0.0612011	-0.0699879	-0.093991	-0.237268	-0.047305	-0.292356	-0.267413	0.0321783	-0.0506174	0.459136	0.252793	-0.156869	-0.045387	-0.201904	-0.0148853	-0.0761717
ENSMUSG00000021681	Aggf1	0.1037	0.249599	-0.187137	-0.00149054	-0.0331052	0.127588	0.117712	0.317001	0.412511	0.362262	0.212057	0.374373	0.559315	0.638562	0.373202	-0.169783	-0.260152	-0.591726	-0.609292	-0.294515	-0.219844	-0.2531	0.0626077	0.198627	0.119572	0.118589
ENSMUSG00000021690	Jmy	-0.0834808	0.0778574	0.180018	-0.0488235	-0.151906	0.0990981	0.252311	0.32216	0.295532	0.377536	0.590264	0.756355	0.248627	0.443935	0.499155	-0.509671	-0.407966	-0.371829	-0.299228	0.263257	-0.0864898	0.102854	0.223286	-0.221557	-0.114744	0.341128
ENSMUSG00000021693	Kif2a	-0.153273	0.287893	-0.213179	-0.0273809	-0.182477	-0.0688823	0.103866	-0.128999	0.0824506	0.244263	0.32654	0.289701	0.158214	0.388246	0.316663	0.0133624	-0.022335	-0.254537	0.256261	0.201832	0.0411698	0.340288	0.611663	-0.146348	-0.060746	0.00770401
ENSMUSG00000021700	Rab3c	0.081631	0.350024	0.00574181	0.0522569	-0.12306	0.152823	0.272446	0.233697	-0.0155162	0.330195	0.285902	0.448632	0.401915	0.470439	0.55783	-0.19715	-0.373877	-0.0378006	-0.00254841	0.288204	0.151173	0.230002	0.599712	0.0505008	-0.000398991	0.00613365
ENSMUSG00000021701	Plk2	-0.117162	0.187155	-0.179758	0.117321	0.0699663	0.25475	0.0465603	0.0305082	0.481285	0.428857	0.492499	0.371196	0.495521	0.557593	0.117138	-0.0187111	-0.235822	-0.41255	-0.604583	0.00432976	-0.220462	0.290082	0.26646	0.24778	-0.036334	0.104363
ENSMUSG00000021703	Serinc5	0.15659	0.473537	-0.0768049	0.0992824	0.192871	0.23691	-0.0502896	0.0714043	0.281457	0.341418	0.249232	0.324353	0.418934	0.464439	0.245883	0.0544455	-0.0103538	-0.2984	-0.119579	-0.271982	-0.107768	0.237452	0.328532	0.210589	-0.256618	-0.0255272
ENSMUSG00000021706	Zfyve16	0.16404	0.0607354	0.498613	0.0892656	0.179862	0.519802	0.233962	0.23634	0.0631254	-0.0769552	0.112977	0.224941	0.288702	-0.0645848	0.0204616	-0.28545	-0.15704	0.154633	0.164544	0.0370337	-0.122562	0.154398	-0.141966	0.138124	-0.267754	-0.0808461
ENSMUSG00000021707	Dhfr	0.0360915	0.311201	-0.229233	0.235487	0.323779	-0.0523487	-0.233881	-0.316422	0.00569811	-0.0203104	-0.179416	-0.406519	0.189995	0.0630005	-0.10273	0.548607	0.352822	-0.00136783	0.0866552	-0.400131	0.0109455	0.151397	0.190989	0.321484	0.0636533	-0.418419
ENSMUSG00000021709	Erbin	0.294328	0.0674246	0.560189	0.245516	0.249648	-0.268833	0.0561308	0.110934	0.351833	0.190544	0.373468	0.354004	-0.0459231	-0.124458	-0.138325	-0.236971	0.312104	-0.0900371	0.205755	-0.155231	-0.214661	-0.173862	-0.410452	-0.412737	-0.218368	0.702376
ENSMUSG00000021711	Trappc13	0.0599248	0.129971	-0.149871	-0.0963914	-0.289674	0.1206	0.395136	0.310682	-0.382903	0.151946	-0.0319861	0.19552	0.123033	0.293	0.56954	-0.0753979	-0.240236	0.0542394	0.244737	0.323777	0.51739	0.00547011	0.546795	-0.0365715	0.0881876	-0.26413
ENSMUSG00000021713	Ppwd1	0.42634	0.410855	0.36982	0.454995	0.635884	0.34968	0.101981	-0.0684765	0.422738	-0.0107749	0.0376883	-0.160328	0.333274	0.0248454	-0.124686	0.118526	0.0770726	0.273354	0.0253347	-0.358856	-0.332137	0.184164	-0.201306	0.163874	-0.169892	-0.0474511
ENSMUSG00000021719	Rgs7bp	-0.0664288	0.290827	0.186097	0.132555	0.0473335	0.345392	0.294583	0.0911644	0.546207	0.310044	0.672981	0.646314	0.519289	0.625396	0.292284	-0.355667	-0.394247	-0.440715	-0.401901	0.0690898	-0.342283	0.29535	0.292554	-0.024491	-0.12143	0.147823
ENSMUSG00000021728	Emb	0.264257	0.278063	0.36795	0.291994	0.105816	0.555035	0.136311	0.268474	0.110316	0.205112	0.079827	0.279882	0.10892	0.245972	0.0877389	-0.191638	-0.440378	-0.0791009	-0.44102	-0.126308	-0.254481	-0.150175	-0.169976	-0.0384075	-0.352099	-0.023282
ENSMUSG00000021730	Hcn1	0.0483563	0.0595781	-0.0864778	-0.293303	0.0390893	0.33231	-0.114348	-0.174105	-0.249372	-0.319578	-0.218512	-0.262417	0.00665157	-0.260406	0.00404344	0.0806976	0.0497385	0.307977	0.393241	-0.0353143	0.154126	0.310255	0.196751	0.148444	-0.263442	-0.434577
ENSMUSG00000021731	Mrps30	0.272683	0.2848	0.0728198	-0.170529	-0.311308	0.105028	0.0727478	0.466793	-0.00578495	0.374036	0.101778	0.638542	0.105305	0.338397	0.464843	-0.25874	-0.21243	-0.167469	0.0136452	0.129695	0.0808445	-0.225216	0.192481	-0.0410806	-0.163179	0.419764
ENSMUSG00000021738	Atxn7	-0.103815	-0.248035	-0.179496	-0.277681	-0.0746113	0.0821819	0.00311592	-0.0424214	-0.185788	-0.172997	0.010628	-0.123528	0.0448506	-0.225061	0.0514947	0.157181	0.0935094	0.45699	0.362102	0.351004	0.593838	0.51843	0.399574	0.269321	0.13503	-0.262782
ENSMUSG00000021750	Fam107a	-0.454209	0.0490226	-0.527415	-0.192479	-0.297751	0.0679316	-0.238692	-0.292827	0.233464	-0.27461	-0.0380523	0.0309964	-0.229618	0.299202	0.105319	0.293738	-0.215682	0.173893	-0.165594	0.304074	0.0626808	0.591085	0.670281	0.301874	0.587631	-0.17552
ENSMUSG00000021752	Kctd6	0.0433033	-0.0864777	0.1647	0.316306	0.358483	-0.0339403	-0.10774	-0.46422	-0.294534	-0.30602	-0.18002	-0.680624	-0.321369	-0.465318	-0.575743	0.433544	0.349092	0.426243	0.0417526	-0.157008	-0.0223674	-0.112888	-0.391598	-0.350245	-0.190874	-0.344427
ENSMUSG00000021754	Map3k1	-0.270523	-0.39584	-0.328863	-0.599476	-0.621646	-0.0209006	0.0545991	0.1882	-0.242467	-0.431216	-0.345442	0.0850238	-0.432921	-0.135422	0.311825	-0.134361	-0.269852	0.365131	0.333199	0.563932	0.501125	0.187073	0.381564	0.192241	0.528279	-0.0728284
ENSMUSG00000021756	Il6st	-0.437025	-0.438085	-0.250629	-0.374864	-0.470615	0.0628196	0.140248	0.111283	-0.144661	0.138044	0.212604	0.19901	0.104321	0.0833898	0.17768	-0.146256	-0.375597	-0.03234	-0.204446	0.696332	0.452581	0.271419	0.439633	0.285181	0.394332	-0.092858
ENSMUSG00000021759	Plpp1	0.0293378	0.418349	0.0425285	0.522548	0.255517	0.218989	0.296356	-0.0943764	0.471673	0.222644	0.31893	0.134838	0.238158	0.593991	0.0977651	0.124463	-0.24944	-0.0854508	-0.485237	0.00339454	-0.339759	0.132574	0.188737	-0.0828392	0.195079	0.00469532
ENSMUSG00000021760	Gpx8	0.0880122	-0.0263279	0.0176278	-0.0409168	0.112759	0.31071	-0.0487052	0.13414	0.0789926	0.0466704	0.0747377	-0.0134098	0.298502	0.0102852	0.0256754	0.126003	-0.0712134	0.188666	-0.209933	0.02365	0.232967	0.142804	0.0401097	0.214066	0.0586222	-0.19222
ENSMUSG00000021779	Thrb	-0.225345	0.17345	-0.356485	-0.0729858	-0.262695	0.307808	-0.0179381	-0.0260386	-0.0856622	-0.228371	-0.204857	-0.0544497	0.125399	0.318807	0.293295	0.150266	-0.406935	0.114226	-0.0795122	0.13501	0.148502	0.335625	0.61728	0.317654	0.381137	-0.551397
ENSMUSG00000021786	Oxsm	0.29994	0.346091	0.279169	-0.117313	0.123017	0.117999	0.00112153	0.115189	0.184782	-0.031216	0.0984847	0.344784	0.14576	0.019282	0.201016	-0.289719	0.0325967	0.0452345	0.400946	-0.124395	-0.267935	0.0994345	-0.00604604	-0.15127	-0.383829	0.284103
ENSMUSG00000021810	Ecd	-0.0833444	-0.16778	-0.136817	0.257531	0.0824619	-0.297923	-0.0717232	-0.40431	-0.0132504	-0.098354	-0.0435082	-0.508097	-0.337566	-0.179123	-0.366005	0.482719	0.267644	0.207502	-0.213852	-0.00320296	0.13303	-0.138965	-0.137923	-0.211804	0.311879	-0.0539394
ENSMUSG00000021822	Plau	0.237769	0.114384	0.294796	0.123139	0.0408602	0.4096	0.748727	0.286133	-0.00611976	0.0288573	0.135955	0.193649	0.128144	0.2756	0.412531	-0.311621	-0.403488	0.13789	-0.0296205	0.256332	0.147321	-0.0984812	0.0976323	-0.202004	0.0135932	-0.151951
ENSMUSG00000021835	Bmp4	0.158043	0.0795496	0.703504	0.418236	0.318542	0.457632	0.377744	0.0475243	0.109791	-0.09803	0.272438	0.201593	-0.0242038	-0.0725753	-0.135027	-0.329319	-0.251142	0.157158	-0.048998	0.0333067	-0.330057	0.0939632	-0.311214	-0.303585	-0.45037	0.00162011
ENSMUSG00000021838	Samd4	0.445901	0.323237	0.177228	-0.0405974	-0.0467972	0.123891	0.156945	0.438681	-0.111614	0.560552	0.148431	0.449057	0.401623	0.219383	0.298445	-0.271933	-0.0275186	-0.381313	0.0706177	-0.13898	0.0241338	-0.368913	-0.0192141	-0.0430031	-0.504525	0.323813
ENSMUSG00000021843	Ktn1	-0.239048	0.058903	-0.15386	0.0790536	0.176517	0.134273	-0.069008	-0.0497116	0.597585	0.393147	0.527545	0.317997	0.401897	0.410463	0.0279273	0.00213797	-0.0643647	-0.395167	-0.388847	0.00777164	-0.21899	0.496214	0.198686	0.245504	-0.0508787	0.0992132
ENSMUSG00000021880	Rnase6	0.382294	0.16346	0.349562	0.232017	0.341432	0.230059	0.431826	0.400688	0.217599	0.0554835	0.091226	0.151089	0.503126	0.191181	0.201734	-0.215913	-0.0377738	0.0311085	0.0212521	-0.218417	-0.0195289	-0.149313	-0.197627	0.0615294	0.0283121	-0.00943902
ENSMUSG00000021884	Hacl1	-0.147609	0.224205	0.138347	0.415517	-0.119537	0.0439505	0.107043	0.178314	0.332823	0.638124	0.530734	0.590637	0.27555	0.605515	0.0628837	-0.207435	-0.366279	-0.639701	-0.583805	0.0941918	-0.362863	-0.0548487	0.118561	-0.138606	-0.0351428	0.361735
ENSMUSG00000021892	Sh3bp5	0.134034	0.509267	0.00570032	0.568925	0.447557	-0.0529884	0.284951	-0.114036	0.631655	0.301503	0.519805	0.169609	0.44242	0.647574	0.340888	0.096758	0.00256291	-0.255881	-0.329658	-0.307641	-0.296464	0.190855	0.233428	-0.213492	0.0363066	0.0411058
ENSMUSG00000021893	Capn7	-0.202045	0.0914712	-0.449862	-0.145429	-0.385876	0.0185426	0.150394	-0.0698263	-0.117101	0.112613	0.0598679	0.0847985	0.00391187	0.333262	0.329503	0.185576	-0.223303	0.120666	0.0656147	0.513176	0.414499	0.34806	0.788471	0.153723	0.397943	-0.132563
ENSMUSG00000021895	Arhgef3	0.117266	0.058609	0.0702885	0.154989	0.172315	-0.323835	-0.132453	-0.147477	0.275729	-0.144395	-0.0353575	-0.0807454	-0.168965	-0.207079	-0.220321	0.262148	0.426026	0.413826	0.47167	0.0438708	0.0799288	0.274164	0.0707613	0.136482	0.397504	0.408341
ENSMUSG00000021900	Btd	-0.125868	-0.119243	-0.390841	-0.283657	-0.307599	-0.241114	-0.327503	-0.0109243	-0.130328	-0.0890178	-0.253689	-0.108756	0.052114	-0.0417953	-0.0171864	0.200067	0.130374	0.00616133	-0.018596	-0.00626211	0.217693	-0.0532773	0.219081	0.486498	0.472005	0.057688
ENSMUSG00000021901	Bap1	0.211203	0.150748	0.453688	0.484753	0.329644	-0.233445	0.477471	0.0506829	0.342313	0.208479	0.445239	0.218638	0.082997	0.151158	0.228888	-0.224465	0.0321814	-0.0526307	0.158486	-0.0200534	-0.0513621	0.0395374	-0.0390704	-0.43544	-0.0450422	0.267935
ENSMUSG00000021904	Sema3g	-0.17067	0.0223903	-0.307546	-0.107281	-0.190145	-0.374159	-0.208245	-0.275811	0.276016	-0.0327099	0.186206	0.0787972	-0.153787	0.133354	-0.0543949	0.21925	0.2424	0.0014828	0.0133584	0.109104	0.01918	0.16558	0.290947	-0.0582361	0.396483	0.37515
ENSMUSG00000021906	Oxnad1	0.334788	0.660907	-0.181586	0.36074	0.391595	0.0704009	0.15177	-0.070598	0.261018	0.167853	-0.0617437	-0.139815	0.317212	0.590438	0.339608	0.217275	0.0221645	-0.284361	-0.352511	-0.632835	-0.320946	-0.278523	0.0752986	-0.0374367	-0.0423194	-0.239673
ENSMUSG00000021911	Parg	-0.141684	-0.236673	0.0456352	-0.474045	-0.274587	0.410516	0.35072	0.280019	0.142844	-0.390263	0.100947	0.37022	0.146614	0.106212	0.38961	-0.611197	-0.518787	-0.0103498	0.0232171	0.225469	0.0176576	0.252929	0.155881	0.0786375	0.0515022	-0.149469
ENSMUSG00000021930	Spryd7	-0.107189	-0.0487803	-0.251339	-0.376654	-0.325571	-0.15367	-0.304639	0.0364902	-0.12291	0.179204	0.0286877	0.181367	0.149091	-0.0152143	-0.0305994	0.218546	0.271191	-0.0201809	0.182404	0.253484	0.367004	0.0779506	0.363095	0.42035	0.33162	0.245101
ENSMUSG00000021932	Rnaseh2b	-0.0112705	0.0794329	0.267733	0.496694	0.200521	-0.109137	0.393626	0.0529497	0.077255	0.580572	0.605862	0.198016	0.458098	0.322643	0.0659913	-0.160579	-0.0403119	-0.465431	-0.245154	0.0159804	-0.0442268	-0.0842802	0.0171538	-0.323295	-0.187261	0.0532649
ENSMUSG00000021936	Mapk8	-0.0562809	-0.00248552	-0.39277	-0.298358	-0.517886	0.112663	0.112518	0.208026	-0.41525	0.189514	-0.198085	0.0995754	-0.124199	0.196392	0.34506	0.0761825	-0.273632	0.0703982	0.00892262	0.46384	0.448098	-0.0907859	0.457697	0.0944938	0.1531	-0.102021
ENSMUSG00000021938	Pspc1	0.110911	0.350323	-0.181656	-0.158853	0.220071	0.147662	-0.225355	-0.284967	0.215453	-0.350378	-0.229568	-0.278654	0.241292	0.0648528	0.060156	0.29906	0.099502	0.307727	0.0805508	-0.232133	-0.109771	0.238722	0.251171	0.404077	0.302209	-0.287731
ENSMUSG00000021939	Ctsb	0.0874798	-0.190434	0.0902743	-0.00551626	0.0988769	-0.248095	-0.264561	-0.0741088	0.0549841	-0.103919	-0.128242	-0.148885	-0.456693	-0.337223	-0.35256	0.186005	0.42982	0.0493796	0.00937866	-0.240233	0.0241481	-0.291267	-0.46294	-0.156421	0.0221954	0.295744
ENSMUSG00000021945	Zmym2	-0.192783	0.172976	-0.376209	-0.329867	-0.384794	0.014213	-0.0585233	-0.0927994	0.156499	-0.342477	-0.0921049	0.190524	0.00360089	0.367509	0.292645	0.0086706	-0.2137	0.0162719	-0.103708	0.111944	-0.119954	0.102563	0.456483	0.167265	0.48189	0.00607015
ENSMUSG00000021947	Cryl1	0.405676	0.151389	0.318939	0.272611	0.533779	0.328606	0.0280038	0.0431583	0.0461044	-0.119665	-0.222995	-0.363422	0.27329	-0.18	-0.249035	0.250129	0.19108	0.362117	-0.0494727	-0.357048	-0.0667532	-0.154811	-0.431619	0.229384	-0.0913183	-0.267075
ENSMUSG00000021952	Xpo4	0.0954588	-0.136881	0.267791	-0.0321924	-0.0491366	-0.165892	0.0687315	0.0214301	-0.0741753	-0.196109	-0.12793	0.008881	-0.364537	-0.396739	-0.186947	0.000118419	0.329196	0.373346	0.755585	0.244187	0.154737	0.0776549	-0.114164	-0.105626	0.0587623	0.309744
ENSMUSG00000021957	Tkt	0.0725619	0.0152208	-0.0180704	-0.0348365	-0.232113	0.408892	0.601312	0.598245	0.130165	0.233454	0.136874	0.478038	0.285031	0.576749	0.606658	-0.467421	-0.630629	-0.390008	-0.446349	0.0965331	0.117942	-0.220899	0.148702	0.0456186	0.127609	-0.0869018
ENSMUSG00000021959	Lats2	0.35618	0.264616	0.320267	0.195096	0.154959	0.61216	0.410925	0.276016	-0.110917	0.146892	-0.0333585	0.0957004	0.211696	0.13224	0.0976792	-0.339461	-0.393167	-0.0867341	0.00845971	-0.127505	-0.20024	-0.111342	-0.154108	-0.159215	-0.623221	-0.225314
ENSMUSG00000021962	Dcp1a	0.185991	0.160146	0.138364	0.165481	0.239899	0.156066	0.326426	0.3855	0.356053	0.709463	0.470447	0.417455	0.723945	0.482082	0.265295	-0.242127	-0.104051	-0.583539	-0.368073	-0.122404	-0.0383936	-0.107148	-0.0169297	0.22276	-0.129946	0.163664
ENSMUSG00000021967	Mrpl57	0.11078	0.0969573	-0.185627	-0.336807	-0.0917294	-0.0601678	0.167293	0.294592	0.193545	0.258354	0.22464	0.38952	0.349218	0.290139	0.544474	-0.0339987	0.0971078	-0.0636841	0.250311	0.189316	0.43534	0.166943	0.429882	0.182628	0.200585	0.141145
ENSMUSG00000021978	Extl3	0.141438	0.0736074	0.274651	0.00397132	0.354594	0.00756169	-0.139879	-0.373421	-0.144715	-0.428098	-0.0879153	-0.369142	0.0150517	-0.434623	-0.254278	0.0345867	0.232155	0.470713	0.285911	-0.160731	-0.214337	0.114928	-0.210269	-0.100146	-0.274248	-0.149245
ENSMUSG00000021991	Cacna2d3	0.0817132	0.305894	0.0855148	-0.108794	0.0325986	0.326606	0.195419	0.190285	0.273011	0.121413	0.287893	0.422764	0.67445	0.392784	0.416152	-0.196221	-0.270875	0.0081401	-0.0231352	0.17592	-0.0287278	0.330158	0.443716	0.404058	0.150676	-0.0023278
ENSMUSG00000021994	Wnt5a	0.408381	0.572546	0.187096	0.36291	0.32934	0.364079	0.11583	0.036918	-0.0002341	-0.0675167	-0.162199	-0.0538071	0.0574008	0.218345	0.197936	0.0551238	-0.0854162	0.165788	0.0714911	-0.412012	-0.239291	-0.0317999	0.00936908	-0.151701	-0.391096	-0.260319
ENSMUSG00000021996	Esd	-0.18389	-0.267371	-0.0843643	-0.25894	-0.393569	0.220996	-0.226145	-0.0122785	-0.577412	-0.309345	-0.373427	-0.106768	-0.465694	-0.343246	-0.22454	0.0144919	-0.196246	0.313242	-0.0311653	0.285276	0.104772	-0.0551548	-0.0452644	0.0644308	-0.153441	-0.149013
ENSMUSG00000021998	Lcp1	0.0292552	-0.302869	-0.102168	-0.327207	-0.32671	-0.113083	0.157201	0.384237	-0.232026	0.0445619	-0.25554	0.0540794	-0.0810942	-0.159374	0.132203	-0.146974	0.0777606	-0.0833028	0.399192	0.181155	0.395584	-0.248837	-0.0538729	0.124651	0.202311	0.101695
ENSMUSG00000022008	Gpalpp1	0.187902	-0.0342715	0.132449	-0.114192	-0.107476	0.0895288	0.112169	-0.0209375	-0.247154	-0.43474	-0.331331	-0.188601	-0.377458	-0.280473	-0.133614	-0.0125466	-0.0129487	0.557883	0.321541	0.1691	0.0905245	-0.133863	-0.109856	-0.212542	0.100172	0.0314473
ENSMUSG00000022009	Nufip1	0.180674	0.212557	0.140562	0.159309	0.0306958	-0.0617733	0.194423	0.163844	0.394725	0.175354	0.246384	0.35428	0.317728	0.303668	0.0738007	0.0408592	0.0858741	-0.0495249	-0.0625104	0.0727058	-0.0447357	-0.0827565	0.0925074	0.149642	0.407086	0.451126
ENSMUSG00000022013	Dnajc15	0.16958	0.088795	0.310336	0.00799039	-0.0778309	0.168236	0.261687	0.531959	0.0537965	0.573784	0.406892	0.673515	0.426596	0.337992	0.30392	-0.506046	-0.252551	-0.40616	-0.238927	0.111745	-0.061831	-0.229234	-0.059965	-0.0219545	-0.287979	0.406435
ENSMUSG00000022014	Epsti1	0.0676543	-0.152067	0.0775608	0.0223766	-0.219625	-0.118815	0.130126	0.247177	-0.518817	0.239536	-0.0640254	0.101043	-0.303925	-0.116027	0.114552	-0.0268749	-0.000795096	-0.0889007	-0.0475327	0.157348	0.359459	-0.459735	-0.112765	-0.292441	-0.204677	0.0627734
ENSMUSG00000022016	Akap11	-0.072279	0.514722	-0.443575	0.138293	0.0247145	0.015133	-0.0468762	-0.12564	0.498394	0.194245	0.252364	0.229992	0.286999	0.733606	0.424658	0.188642	-0.170072	-0.259927	-0.391156	-0.155945	-0.204416	0.304892	0.592373	0.0883204	0.248113	-0.00837486
ENSMUSG00000022018	Rgcc	-0.154954	0.15409	-0.238757	-0.185711	-0.0968893	-0.0258499	-0.0231478	-0.112813	0.167594	0.120661	0.247761	0.198863	0.38656	0.207688	0.18272	-0.0113092	-0.0065422	-0.0395997	0.288712	0.253409	0.0514428	0.546498	0.591434	0.295218	0.119053	0.0503377
ENSMUSG00000022022	Mtrf1	0.526273	0.134453	0.303456	0.32189	0.499638	0.254761	0.0669075	0.143028	-0.17241	0.110615	-0.261613	-0.361259	0.0564923	-0.244938	-0.22965	0.298705	0.343651	0.2661	0.0844575	-0.399202	0.171429	-0.31547	-0.462113	0.0904936	-0.318508	-0.196801
ENSMUSG00000022023	Wbp4	0.101478	-0.233946	-0.169516	-0.211865	0.021122	0.00593131	-0.0823961	0.154265	-0.0993094	0.0338195	-0.17123	-0.232175	0.267064	-0.179597	-0.174271	0.305984	0.291696	0.198633	0.0337109	0.0354411	0.449398	-0.0959004	-0.079847	0.42626	0.323138	-0.0823792
ENSMUSG00000022024	Sugt1	-0.47972	-0.103768	-0.40875	-0.440539	-0.434747	0.0717519	-0.415074	-0.0208701	0.188269	0.0248662	0.201652	0.416222	0.189332	0.206689	0.0239651	-0.0857394	-0.204775	-0.196766	-0.125755	0.31241	-0.0854131	0.559053	0.493213	0.424937	0.162676	0.156376
ENSMUSG00000022031	Elp3	-0.167431	-0.403844	0.184877	0.114243	-0.0867921	0.0611231	0.216271	0.000692742	-0.357994	-0.24225	-0.0921686	-0.249412	-0.413715	-0.366633	-0.0960153	0.0330975	-0.157211	0.458522	0.140659	0.429305	0.414711	0.0950928	-0.0518711	-0.293759	0.114722	-0.31831
ENSMUSG00000022035	Ccdc25	0.0376488	-0.215065	0.129687	0.0468439	-0.0034329	-0.0790044	-0.120894	-0.147225	-0.291059	-0.222591	-0.219789	-0.277881	-0.635345	-0.416698	-0.325446	0.207441	0.196261	0.221101	-0.0077547	-0.0441227	0.100667	-0.322487	-0.416328	-0.421512	-0.19642	-0.0291767
ENSMUSG00000022044	Stmn4	-0.0549799	0.363858	0.148029	0.359615	-0.0786413	0.124477	0.190726	0.215398	0.425214	0.409486	0.531727	0.679086	0.330949	0.690645	0.383643	-0.324076	-0.47758	-0.467461	-0.518323	0.0277184	-0.387306	0.0654452	0.264173	-0.160681	-0.0275452	0.296329
ENSMUSG00000022052	Ppp2r2a	0.214392	-0.0652131	-0.24972	-0.423569	-0.0129011	0.254811	0.164459	0.450303	0.0656969	-0.131773	-0.323091	0.0361024	0.289456	0.0515472	0.395846	-0.170385	-0.0907281	0.0976075	0.242275	-0.1105	0.336205	0.115353	0.137861	0.571421	0.171355	-0.182917
ENSMUSG00000022055	Nefl	-0.425941	-0.15192	-0.0849172	0.0334966	-0.446667	-0.213064	-0.067576	-0.210727	0.111866	-0.00113537	0.336569	0.263027	-0.281453	0.194633	-0.0641063	-0.0937514	-0.317588	-0.132258	-0.406811	0.404186	-0.128235	0.0796365	0.240675	-0.328409	0.316077	0.288108
ENSMUSG00000022066	Entpd4b	-0.254854	0.15467	-0.30934	0.00330044	-0.231404	0.0421695	-0.307949	-0.114854	0.0312695	0.0592722	-0.0633978	0.046179	0.129636	0.186291	-0.0377042	0.210978	-0.14789	0.026106	0.0681406	0.189799	-0.0306337	0.456618	0.50817	0.389634	0.218658	-0.0946842
ENSMUSG00000022075	Rhobtb2	0.285592	-0.023413	-0.0566082	-0.391648	-0.216833	0.418751	0.103974	0.210651	-0.40139	-0.292013	-0.469604	-0.111749	-0.148493	-0.265705	0.0562195	0.06002	-0.109947	0.630795	0.390815	0.304476	0.493069	0.0545984	0.212859	0.363553	0.112781	-0.138299
ENSMUSG00000022090	Pdlim2	-0.453893	-0.293015	-0.107148	-0.398717	-0.563705	0.173273	0.041362	0.194993	0.0880171	-0.166323	0.172058	0.458175	0.0550175	0.137175	0.231901	-0.376135	-0.544227	0.0214445	-0.00744345	0.624022	0.138249	0.453554	0.469548	0.191993	0.421161	0.0388762
ENSMUSG00000022091	Sorbs3	-0.188204	0.034994	-0.297431	0.0420547	0.319355	0.246457	0.0256034	-0.332581	0.250442	-0.322662	0.00871706	-0.398576	0.306996	0.121709	0.0217158	0.378584	0.0393854	0.175193	-0.136173	-0.146681	0.101945	0.516518	0.313246	0.384001	0.302038	-0.681998
ENSMUSG00000022094	Slc39a14	0.364745	-0.0904541	0.265354	-0.0581888	0.163808	0.15871	0.362513	0.468557	0.147057	-0.0387801	-0.125288	0.0781392	0.285893	-0.0603848	0.11615	-0.147184	0.131893	0.0827679	0.234014	-0.121855	0.246631	-0.249998	-0.271618	0.2879	0.252232	0.0833194
ENSMUSG00000022098	Bmp1	0.076945	0.327031	-0.0696091	0.118446	0.1998	0.165552	-0.0709699	0.0286552	0.129431	0.481468	0.33468	0.282309	0.421041	0.294998	0.160236	0.123653	0.110545	-0.24265	-0.0909668	-0.0736162	-0.0404629	0.269037	0.269111	0.233521	-0.387792	0.0510309
ENSMUSG00000022103	Gfra2	0.204019	0.601754	0.289598	0.709455	0.408485	-0.199617	0.154841	-0.264117	0.512394	0.283734	0.376972	0.111379	0.086879	0.400782	0.0645973	0.160084	0.09408	-0.0437512	-0.0864757	-0.150974	-0.503908	0.0243016	0.04046	-0.41737	0.0020432	0.331428
ENSMUSG00000022108	Itm2b	0.130038	-0.269538	0.1344	-0.244406	0.126391	0.0538681	-0.175548	-0.0341665	-0.324761	-0.399985	-0.434874	-0.36905	-0.23105	-0.656849	-0.446555	0.0667218	0.379674	0.391838	0.491028	-0.0948788	0.119162	-0.0583559	-0.389382	0.218882	-0.119382	-0.0495204
ENSMUSG00000022109	Med4	0.339542	0.441826	0.00603416	0.263394	0.164437	-0.379914	-0.111472	0.0109792	-0.163511	0.491012	0.0729654	0.0400734	0.0895573	0.142142	0.173447	0.155458	0.399262	-0.361169	0.167739	-0.426676	-0.0378361	-0.411633	-0.0385765	-0.380367	-0.455167	0.204714
ENSMUSG00000022110	Sucla2	0.135164	0.288666	-0.0539848	0.087439	-0.0747994	0.304005	0.491616	0.299596	-0.0618857	0.414354	0.230686	0.333782	0.358212	0.62101	0.553991	-0.339378	-0.505779	-0.548913	-0.462255	-0.0956223	-0.0378629	-0.275375	0.21078	-0.199044	-0.322297	-0.224603
ENSMUSG00000022111	Uchl3	0.0624456	0.198678	0.294117	0.511334	0.528317	-0.00335206	-0.0459192	-0.282508	0.350031	0.1136	0.305777	-0.119163	0.00623909	0.0435363	-0.240697	0.0327298	0.156334	-0.258272	-0.276687	-0.482202	-0.581872	-0.0501633	-0.467977	-0.507211	-0.540796	-0.015758
ENSMUSG00000022119	Rbm26	0.210372	-0.00155687	0.272855	0.397084	0.233428	-0.29905	0.076294	-0.0421838	-0.311485	0.337432	0.0826287	-0.256734	-0.0185306	-0.21424	-0.174238	0.07643	0.302134	-0.155931	0.0791705	-0.225818	0.0713131	-0.431289	-0.36552	-0.470265	-0.384421	0.0132214
ENSMUSG00000022122	Ednrb	0.309259	0.41884	0.322488	0.113383	0.0137975	0.38202	0.127877	0.121879	0.00259404	0.076842	-0.0239774	0.271859	0.00467183	0.0930055	0.0653968	-0.138011	-0.187974	0.200041	0.294243	0.118635	-0.204983	0.087566	0.0973065	-0.0751755	-0.327673	0.166092
ENSMUSG00000022131	Gpr180	0.171854	0.115671	0.0223849	0.107979	0.0723036	-0.0276467	0.121267	0.357636	0.129755	0.302636	0.0804908	0.31616	0.11843	0.227896	0.397214	-0.143512	-0.0923522	-0.172609	-0.0602833	-0.103265	0.124766	0.00345402	0.0910427	0.139729	-0.0751265	0.145823
ENSMUSG00000022132	Cldn10	-0.190716	0.135239	0.231913	0.444196	0.288455	0.254297	0.300089	-0.109222	0.505732	0.184995	0.689504	0.292753	0.463174	0.40927	0.0384411	-0.199789	-0.270678	-0.290328	-0.348239	0.0138287	-0.348406	0.467899	0.156948	-0.177912	-0.155529	-0.091122
ENSMUSG00000022139	Mbnl2	0.110594	0.245612	0.338323	0.281452	0.478641	-0.214836	-0.424601	-0.455875	0.34324	-0.031541	0.161625	-0.141427	-0.0115426	-0.263085	-0.535627	0.19092	0.500697	0.0610178	0.179089	-0.367896	-0.557872	0.139259	-0.349966	-0.11406	-0.285093	0.339559
ENSMUSG00000022148	Fyb	0.379104	0.1265	0.179341	-0.00343696	-0.0840732	0.228361	0.245629	0.637882	-0.28343	0.589116	-0.101525	0.310302	0.208295	0.196749	0.330599	-0.288263	-0.227684	-0.33093	-0.152528	-0.0488282	0.151528	-0.579966	-0.204719	0.0389978	-0.34255	0.109542
ENSMUSG00000022150	Dab2	0.102281	0.189254	0.191841	0.0909225	-0.190868	0.146706	0.327248	0.318855	0.172111	0.565633	0.423061	0.611143	0.352952	0.451519	0.167536	-0.352886	-0.339035	-0.33814	-0.178276	0.321068	-0.110757	-0.0523446	0.1825	-0.0372675	-0.0824007	0.449073
ENSMUSG00000022159	Rab2b	0.118819	0.0936769	0.314966	0.388379	0.227323	-0.165072	0.0984416	0.160065	0.295487	0.492873	0.50946	0.353519	0.338231	0.256354	0.0239312	-0.261498	-0.0290817	-0.381446	-0.438978	-0.16823	-0.325545	-0.202792	-0.280389	-0.233931	-0.254162	0.44174
ENSMUSG00000022160	Mettl3	-0.177956	-0.296123	0.34288	0.0347939	0.0430521	0.0509956	-0.130158	-0.0992516	0.212352	-0.220749	0.225304	0.0958093	-0.152149	-0.33037	-0.336927	-0.194423	-0.0710057	0.27205	0.132225	0.220964	-0.127813	0.434154	-0.16866	-0.113248	-0.0855248	0.169638
ENSMUSG00000022175	Lrp10	0.423444	0.23586	0.0348466	-0.0531069	0.130136	0.258035	0.16502	0.500387	-0.0468631	0.625926	0.0745132	0.270808	0.536572	0.263628	0.316722	-0.0658816	0.0200434	-0.308739	-0.109988	-0.158754	0.185962	-0.319344	-0.0717357	0.212519	-0.373297	0.0584672
ENSMUSG00000022177	Haus4	0.110012	-0.0605598	-0.00664884	-0.387094	-0.279069	0.1947	-0.264923	0.0946615	-0.257747	-0.216318	-0.331768	0.083902	-0.345866	-0.343168	-0.212993	0.148602	0.147381	0.522604	0.480263	0.326643	0.262095	0.138896	0.0757603	0.240832	-0.011123	0.214124
ENSMUSG00000022184	Fbxo4	0.036142	-0.344143	0.454028	-0.0590916	-0.0824018	-0.0552934	0.12323	0.0657169	-0.210693	-0.174421	-0.0141931	0.0400892	-0.330047	-0.484955	-0.399132	-0.176087	0.132228	0.29758	0.3468	0.341594	0.0410235	-0.183889	-0.433796	-0.313932	-0.0903612	0.316443
ENSMUSG00000022191	Drosha	0.520102	0.305409	0.238803	0.179601	0.0410577	0.198273	0.281964	0.384611	-0.339925	0.455494	-0.180656	0.0701284	0.120348	0.0822834	0.20934	-0.0356756	-0.0957281	0.0773559	0.0620535	0.0399925	0.170091	-0.470415	-0.0897168	0.00957422	-0.260932	0.109227
ENSMUSG00000022193	Psmb5	0.210533	0.289553	0.294791	0.375005	0.538221	0.0302184	0.284369	0.0162006	0.598226	0.205998	0.44523	0.168097	0.397974	0.410231	0.23042	-0.171488	0.0336528	-0.345112	-0.417714	-0.468006	-0.44692	-0.142264	-0.298318	-0.253049	-0.174418	0.0769201
ENSMUSG00000022195	6030458C11Rik	-0.3773	0.232943	-0.378453	0.0379317	-0.281338	-0.327577	-0.142198	-0.238606	0.180747	-0.0655698	0.156552	0.234654	-0.0810448	0.40533	0.318504	0.16731	-0.0227524	-0.124672	0.107927	0.151914	-0.0237288	0.411591	0.711115	0.0225053	0.431278	0.0421087
ENSMUSG00000022197	Pdzd2	-0.0413367	0.0840606	0.0363045	0.0762691	-0.0446358	0.146015	0.0650613	-0.0495835	-0.0574246	0.13018	-0.0171457	-0.0630145	0.263962	0.0882506	-0.0654557	-0.0784752	-0.249289	-0.151719	-0.176091	0.0684879	-0.18437	-0.060558	0.0587143	0.227295	0.0523009	-0.102352
ENSMUSG00000022200	Golph3	-0.0155078	0.354383	-0.103566	0.137285	-0.0685445	-0.178782	-0.13011	0.0400784	0.337572	0.21993	0.233171	0.352191	0.37891	0.475183	0.246208	-0.021194	-0.164428	-0.229087	-0.319187	-0.055484	-0.268077	0.0438419	0.308857	0.124115	0.287475	0.297062
ENSMUSG00000022201	Zfr	-0.0915589	0.297039	-0.440159	-0.33876	-0.412606	-0.0319787	-0.187569	0.0455817	0.223633	0.136937	0.09205	0.467036	0.115586	0.447466	0.330008	0.110394	-0.025519	-0.157413	0.119333	0.185782	0.0806823	0.284916	0.666127	0.300567	0.262842	0.282106
ENSMUSG00000022208	Jph4	-0.165197	0.417042	-0.444475	0.162443	-0.161844	0.059526	-0.0330105	-0.100892	0.307469	0.296625	0.149098	0.252017	0.0565043	0.67565	0.26435	0.314358	-0.18775	-0.27235	-0.402211	0.0887755	-0.0889726	0.202259	0.59821	0.17959	0.329242	0.0373888
ENSMUSG00000022210	Dhrs4	0.411372	0.0543114	0.0293067	-0.268728	0.101219	0.0892989	0.25413	0.556613	0.00157366	0.322715	-0.0178023	0.233146	0.441929	0.156664	0.442295	-0.345849	-0.0527462	-0.250165	0.00104663	-0.216738	0.192298	-0.349228	-0.167552	0.0883584	-0.23064	0.0700913
ENSMUSG00000022212	Cpne6	0.124555	0.233122	-0.108277	-0.00778813	0.0364219	0.443404	-0.00160107	-0.130305	-0.178308	-0.0977591	-0.27255	-0.201739	-0.0613591	-0.0311869	-0.0714953	0.230025	-0.127873	0.313079	0.0979442	0.0862568	0.052973	0.231681	0.25085	0.312831	-0.128033	-0.292738
ENSMUSG00000022220	Adcy4	-0.0473942	-0.105256	-0.527906	-0.375112	-0.226683	0.03616	-0.044008	0.0748293	-0.446104	0.0823069	-0.207599	-0.191369	0.190622	-0.00354256	0.147889	0.29193	0.114521	0.125803	0.136659	0.199569	0.636434	0.104032	0.456172	0.405896	0.164884	-0.331443
ENSMUSG00000022223	Sdr39u1	-0.338629	-0.246244	-0.104011	0.118549	-0.246628	0.0821564	-0.10678	-0.0580164	0.0469068	0.0311853	0.196947	0.0935295	-0.148308	0.00954992	-0.16679	0.148571	-0.190733	0.149412	-0.237996	0.402282	0.227864	0.399516	0.294632	0.129663	0.301316	0.0298891
ENSMUSG00000022231	Sema5a	0.331029	0.265467	-0.0148191	-0.049208	-0.115497	0.301266	0.426212	0.412103	-0.317889	0.557174	0.103737	0.296322	0.341727	0.33594	0.485547	-0.138515	-0.199657	-0.220917	0.00386021	0.148746	0.366424	-0.247773	0.28971	0.0118801	-0.323027	-0.0599779
ENSMUSG00000022234	Cct5	0.68213	0.637135	0.114181	0.177026	0.406945	0.175182	0.20831	0.281447	0.244513	0.274841	-0.156389	0.0659788	0.324367	0.405297	0.346765	0.0356016	0.0640635	-0.124818	-0.167604	-0.552201	-0.207998	-0.525415	-0.202735	0.0246388	-0.13412	0.104967
ENSMUSG00000022236	Ropn1l	0.107511	-0.240676	0.220456	-0.115085	-0.306845	0.178276	0.365694	0.668202	-0.0217253	0.219143	-0.0415985	0.438878	0.0537382	0.0616027	0.161257	-0.491853	-0.358582	-0.0960863	0.0993152	0.340007	0.167827	-0.19674	-0.139276	0.0966239	0.117531	0.320266
ENSMUSG00000022240	Ctnnd2	-0.136619	0.422834	-0.401921	0.0294991	0.0788528	-0.247128	-0.591302	-0.495621	0.289709	0.106125	0.0494104	-0.0479603	0.0258178	0.213902	-0.187985	0.621912	0.423236	-0.0132678	-0.0295241	-0.13078	-0.20629	0.338377	0.415267	0.337019	0.225656	0.184777
ENSMUSG00000022246	Rai14	0.198287	0.250837	0.0173673	-0.140178	0.0757978	0.552477	0.0750211	0.272901	0.33419	-0.113865	-0.0475569	0.238012	0.48007	0.276808	0.197358	-0.087006	-0.234827	0.0179249	-0.0576121	-0.158503	-0.0677454	0.211115	0.16217	0.486898	0.093188	-0.160217
ENSMUSG00000022248	Rad1	0.287486	0.376138	0.150186	0.37685	0.561487	0.164206	0.516081	0.10765	0.330106	0.286972	0.40325	0.0818614	0.613645	0.476707	0.437115	-0.00375035	0.0470652	-0.207592	-0.1628	-0.316253	-0.00216221	0.0115889	0.0725678	-0.145105	-0.160745	-0.28164
ENSMUSG00000022253	Nadk2	0.0714264	-0.0233811	0.0840494	0.0123965	-0.0752365	0.0681074	0.320652	0.385198	0.250532	0.262527	0.261881	0.444886	0.172443	0.280526	0.404289	-0.457824	-0.343349	-0.278445	-0.270767	0.080685	-0.0898406	-0.0883884	-0.0202475	-0.0455928	-0.0366346	0.32068
ENSMUSG00000022261	Sdc2	0.0919017	-0.147419	0.472539	0.314167	0.497772	0.422404	0.269417	-0.0688793	0.0884874	-0.12124	0.1638	-0.224583	0.219835	-0.260969	-0.402336	-0.113771	-0.0830073	0.26753	-0.133285	-0.00208651	-0.200267	0.179155	-0.422585	-0.0219235	-0.29113	-0.22427
ENSMUSG00000022263	Trio	0.343041	0.0309556	-0.154851	-0.107786	0.00946663	-0.260424	-0.286286	0.0448457	-0.43407	0.0590465	-0.544396	-0.406291	-0.326953	-0.372568	-0.14018	0.544935	0.538061	0.382062	0.412407	-0.0965312	0.504817	-0.369527	-0.128813	0.114988	0.0747761	0.0213275
ENSMUSG00000022270	Retreg1	0.32139	0.429549	0.28928	0.516383	0.167636	0.04927	0.235971	0.179586	0.0557533	0.449627	0.219117	0.298992	0.0697682	0.404091	0.197264	-0.0945934	-0.18578	-0.330018	-0.522663	-0.234725	-0.318978	-0.514365	-0.194957	-0.387866	-0.322997	0.256664
ENSMUSG00000022272	Myo10	0.0698627	0.364595	0.333359	0.54616	0.268942	0.0286706	0.273073	0.0742364	0.524412	0.44808	0.572501	0.449759	0.415321	0.476979	0.156324	-0.0328001	-0.132742	-0.0388206	-0.190699	0.213249	-0.2066	0.290144	0.247191	0.0118596	0.198617	0.360465
ENSMUSG00000022280	Rnf19a	0.406059	0.229321	0.428297	0.154814	-0.0960667	0.487616	0.570791	0.493334	-0.1498	0.128379	0.00649262	0.420019	0.0187493	0.218087	0.378873	-0.43122	-0.500467	0.0570923	-0.063246	0.144959	0.0281694	-0.29902	-0.0223557	-0.168193	-0.260375	0.0997412
ENSMUSG00000022285	Ywhaz	-0.461064	-0.0349387	-0.554608	-0.323075	-0.520668	-0.0807011	-0.553549	-0.245672	-0.0442866	-0.124381	-0.0780018	0.0991044	-0.22005	0.146329	-0.0776135	0.143474	-0.115823	-0.221375	-0.286627	0.0668425	-0.165199	0.173306	0.359728	0.186355	0.156232	0.0542077
ENSMUSG00000022292	Rrm2b	0.159632	-0.258729	0.38933	0.269196	0.435108	-0.0836339	0.250496	0.0801316	0.300864	-0.0487749	0.0788087	-0.135612	-0.153986	-0.248514	-0.160061	-0.0103968	0.228505	0.165741	-0.00903639	-0.106331	0.0426439	-0.116333	-0.540494	-0.098341	0.0895407	0.124239
ENSMUSG00000022295	Atp6v1c1	-0.33901	0.220839	-0.0887912	0.333277	-0.117091	-0.0322474	0.114087	-0.0403243	0.364975	0.529947	0.618247	0.509232	0.354759	0.658434	0.217594	-0.101594	-0.382559	-0.509645	-0.543756	0.272134	-0.293377	0.288859	0.45436	-0.0190135	0.104137	0.1988
ENSMUSG00000022300	Dcaf13	0.0404605	0.270808	0.372043	0.331657	0.291395	-0.0215541	0.228758	0.0564069	0.739924	0.289382	0.636616	0.522765	0.353357	0.400205	0.175477	-0.155959	-0.0108691	-0.0665862	-0.012868	0.144501	-0.292193	0.359473	0.111595	-0.125165	0.144283	0.448444
ENSMUSG00000022305	Lrp12	0.298199	0.554635	-0.0501198	0.184117	0.15301	0.204461	0.237129	0.268344	0.535009	0.479454	0.313104	0.500648	0.543549	0.739807	0.455349	-0.0645803	-0.185706	-0.335308	-0.399955	-0.159608	-0.258283	-0.0365409	0.235229	0.201874	0.0246858	0.294628
ENSMUSG00000022306	Zfpm2	0.0651486	0.37474	-0.0697925	0.470146	0.370348	-0.00528393	0.198592	-0.218569	0.163406	0.4572	0.339432	-0.153736	0.590235	0.416445	0.0302843	0.261426	0.0986804	-0.300676	-0.285062	-0.185971	-0.149955	0.0296251	0.18968	0.0323004	-0.0481489	-0.200587
ENSMUSG00000022313	Utp23	0.222686	0.249036	-0.113562	-0.249702	0.00119496	-0.0737328	-0.134418	-0.0809403	-0.155221	-0.0875225	-0.0588483	0.0212162	0.066989	-0.0105194	0.183243	0.221697	0.365906	0.111294	0.273733	-0.169218	0.175812	-0.110702	0.159555	-0.00541306	-0.148674	-0.00143463
ENSMUSG00000022322	Shcbp1	-0.0801845	-0.110991	-0.0695101	-0.0488887	0.00912137	-0.0717038	-0.0518261	-0.256806	-0.0721042	-0.498382	-0.317188	-0.428071	-0.244453	-0.259549	-0.143324	0.415845	0.14293	0.636797	0.243636	0.225703	0.28157	0.147618	0.119833	0.138673	0.599994	-0.280724
ENSMUSG00000022323	Rida	0.197197	0.486858	0.436049	0.488637	0.35839	0.0997879	0.397587	0.0182143	0.34958	0.395941	0.497266	0.361727	0.344102	0.466255	0.246246	-0.29345	-0.187182	-0.42726	-0.187909	-0.19184	-0.488915	-0.0830342	-0.0428435	-0.431354	-0.389923	0.120991
ENSMUSG00000022329	Stk3	0.212658	0.060944	0.2325	0.32182	0.258292	0.0234394	0.15074	0.182126	-0.163311	0.22796	-0.0761963	-0.164604	0.235015	0.0374543	0.039508	-0.129401	-0.131156	-0.248915	-0.398308	-0.347886	-0.14849	-0.517001	-0.405606	-0.0779089	-0.189234	-0.174136
ENSMUSG00000022335	Zfat	-0.0450432	0.237777	-0.13882	0.163043	0.0171657	-0.277055	0.0236192	0.00427718	0.382695	0.210202	0.205643	0.295922	0.0221454	0.382061	0.26891	-0.0642033	0.019741	-0.302327	-0.0724809	-0.0914096	-0.318629	0.0555123	0.124072	-0.109504	0.0338816	0.353791
ENSMUSG00000022339	Ebag9	0.0911545	0.545787	-0.041293	0.171736	0.081194	0.00452187	0.249831	0.0457496	0.368263	0.422576	0.438354	0.447492	0.434391	0.652197	0.502447	-0.116961	-0.105922	-0.489766	-0.0130375	-0.109152	-0.20405	0.115106	0.432209	-0.193281	-0.137708	0.0923998
ENSMUSG00000022340	Sybu	-0.224876	0.229092	-0.400907	-0.0382808	-0.0658636	0.0426895	-0.00664889	-0.135231	0.180744	-0.160298	0.0104666	0.0485719	0.0629036	0.443069	0.302506	0.110543	-0.173114	-0.0286453	-0.170324	-0.00186025	-0.138193	0.281055	0.428349	0.0311432	0.234798	-0.244545
ENSMUSG00000022342	Kcnv1	0.112206	0.393398	-0.124484	-0.109206	-0.246714	0.00210351	0.150375	0.142438	-0.088108	0.418619	0.215168	0.387342	0.471192	0.46694	0.411405	-0.167647	-0.198067	-0.324549	0.00786463	0.13757	-0.0101209	-0.0831246	0.472592	0.024908	-0.0822405	0.146613
ENSMUSG00000022350	Washc5	-0.0534996	-0.442972	0.419551	-0.00741497	-0.0373445	-0.229665	0.141756	-0.00111102	-0.0515532	-0.126296	0.19358	0.0402688	-0.377271	-0.4564	-0.18943	-0.212761	0.0896442	0.36554	0.220729	0.421173	0.130122	-0.02569	-0.3475	-0.431482	0.00727189	0.36319
ENSMUSG00000022351	Sqle	0.0696045	0.446847	0.233936	0.564784	0.297609	-0.0400606	0.272756	-0.0613397	0.46603	0.553386	0.665539	0.373188	0.517281	0.48868	0.157394	-0.000298421	0.00704992	-0.235766	-0.0524546	0.0914005	-0.259918	0.307603	0.302214	-0.138097	-0.0724152	0.297997
ENSMUSG00000022353	Mtss1	0.213272	0.231675	0.358433	0.676003	0.605571	0.304126	0.265906	-0.124279	0.258705	-0.00126702	0.157958	-0.275736	0.152327	0.137608	-0.0582159	0.0979705	-0.113255	0.0571999	-0.43253	-0.408895	-0.31678	-0.0564606	-0.348801	-0.297464	-0.268666	-0.380072
ENSMUSG00000022359	Wdyhv1	-0.0579073	0.193929	-0.00748196	0.217494	0.0717935	0.236679	0.131092	0.145037	0.525221	0.303997	0.361806	0.399061	0.293765	0.434604	0.220365	-0.156731	-0.247282	-0.361518	-0.230242	-0.0400102	-0.230749	0.335406	0.216077	0.158854	-0.0300635	0.137712
ENSMUSG00000022360	Atad2	0.0107488	0.0358226	-0.463752	-0.275762	-0.178872	0.50941	-0.105991	0.105827	-0.136012	-0.0670072	-0.345494	-0.158567	0.0352876	0.145361	0.0460602	0.370403	-0.116392	0.0912077	-0.182074	-0.0205642	0.376176	0.10159	0.295867	0.491251	0.136054	-0.477781
ENSMUSG00000022361	Zhx1	0.0484073	0.0570435	-0.169505	-0.323129	-0.137305	0.151502	-0.0431457	0.155702	0.13489	-0.0482975	-0.116103	0.0628525	0.385429	0.131812	0.194319	-0.00366118	-0.0540549	0.0198208	0.100196	0.0233955	0.090561	0.0681364	0.191856	0.447857	0.288572	-0.0731451
ENSMUSG00000022364	Tbc1d31	0.152962	0.237073	-0.13382	-0.165122	-0.29598	0.0273042	0.236221	0.411751	0.264661	0.207529	0.0574325	0.565444	-0.0349756	0.489007	0.603455	-0.0915415	-0.147495	-0.191068	0.0580272	0.12346	0.23554	-0.0932846	0.364489	0.035499	0.29056	0.290615
ENSMUSG00000022369	Mtbp	0.0708366	-0.0241961	0.260327	-0.111001	0.0270208	0.16499	0.442487	0.371978	0.229069	0.198089	0.403888	0.522557	0.261584	0.279401	0.519276	-0.662128	-0.406006	-0.298129	-0.152931	0.0776451	-0.100631	0.00713288	-0.0360808	-0.24775	-0.300014	0.124523
ENSMUSG00000022386	Trmu	-0.0111608	-0.0173398	0.364489	0.534718	0.0848338	-0.0450902	0.102704	0.0223201	0.171339	0.349534	0.248996	0.154623	-0.26922	0.0256706	-0.331202	-0.101352	-0.110532	-0.169171	-0.262132	0.104104	-0.346379	-0.15293	-0.366173	-0.415395	-0.189352	0.417531
ENSMUSG00000022387	Brd1	0.0317924	0.110498	0.0744221	-0.311867	-0.306392	-0.0315857	0.0090975	0.261963	-0.146122	0.278197	0.142295	0.500213	0.0644641	0.133744	0.356558	-0.324638	-0.120398	-0.241013	0.260719	0.212401	0.0701236	-0.06828	0.196282	-0.152254	-0.281074	0.230214
ENSMUSG00000022389	Tef	0.102899	0.0857217	0.356315	0.276317	0.122821	0.298253	0.470819	0.465856	0.22695	0.688799	0.660156	0.636768	0.687	0.455801	0.307746	-0.486641	-0.375821	-0.473839	-0.456933	0.148152	-0.0731449	0.00041379	0.0412217	0.0628268	-0.254692	0.252543
ENSMUSG00000022390	Zc3h7b	0.554745	0.688606	0.0906634	0.226269	0.426644	-0.10724	-0.123858	0.106103	0.4569	0.331966	0.113324	0.208053	0.474056	0.402083	0.227835	0.222154	0.351893	-0.161324	-0.126527	-0.576709	-0.273816	-0.308701	-0.0760581	0.0660792	-0.0307627	0.368923
ENSMUSG00000022391	Rangap1	0.598141	0.513196	0.312322	0.289587	0.297188	0.197578	0.391999	0.354405	-0.0517319	0.369675	-0.039259	0.139332	0.422617	0.315366	0.355627	-0.152677	-0.141265	-0.0680462	-0.0502875	-0.255489	-0.0861827	-0.422877	-0.0967427	-0.0366668	-0.280403	0.0173934
ENSMUSG00000022400	Rbx1	0.507281	0.421602	0.598542	0.419927	0.467866	0.293994	0.511509	0.359563	0.305482	0.385774	0.356454	0.424712	0.407693	0.388426	0.325388	-0.416676	-0.139336	-0.379063	-0.301599	-0.405795	-0.438137	-0.438134	-0.431823	-0.314991	-0.56756	0.192028
ENSMUSG00000022401	Xpnpep3	-0.00290302	0.164738	0.347895	0.434256	0.127426	0.229254	0.52421	0.0980294	0.342385	0.445045	0.670186	0.394813	0.519786	0.444591	0.177232	-0.305745	-0.352648	-0.205476	-0.24977	0.286145	-0.211632	0.214637	0.161871	-0.187882	-0.107371	0.141846
ENSMUSG00000022407	Adsl	-0.0926014	0.231471	-0.0187954	0.306495	0.0402756	-0.627442	-0.344564	-0.52974	0.108743	-0.154178	0.0573553	-0.132947	-0.535236	-0.113807	-0.202319	0.339283	0.42352	0.169619	0.304378	-0.0758512	-0.264452	0.0781754	0.0675048	-0.540774	0.06436	0.36759
ENSMUSG00000022412	Mief1	0.0296603	-0.0127133	0.244009	0.417695	0.25318	0.270971	0.331797	0.184085	0.0493411	0.582812	0.448763	0.130858	0.418545	0.200921	0.0279361	-0.147764	-0.250652	-0.35956	-0.366806	0.0296945	0.0388617	0.0625594	-0.0654466	-0.114384	-0.411789	-0.17869
ENSMUSG00000022414	Tab1	0.247482	0.0526541	0.192358	-0.0235566	0.0446787	0.361812	0.509989	0.336788	-0.0252707	-0.0953611	-0.0367401	0.0848076	0.345195	0.123442	0.214098	-0.185509	-0.205393	0.157669	0.0747338	0.11902	0.159933	-0.144688	-0.00278605	0.0486097	0.163111	-0.157652
ENSMUSG00000022420	Dnal4	-0.0274178	0.271975	-0.197232	0.197115	0.167317	0.219396	0.10199	-0.059871	0.317658	0.0543232	-0.020731	-0.0446229	0.078695	0.421297	0.267785	0.0128556	-0.264714	-0.304394	-0.394452	-0.317275	-0.326109	0.0565236	0.080619	0.0807999	-0.0523207	-0.289742
ENSMUSG00000022426	Josd1	-0.0970175	-0.269941	0.0239194	0.0754914	0.17892	-0.234894	0.00525683	-0.252653	-0.226845	-0.0875648	0.0763038	-0.4058	-0.0620369	-0.333439	-0.16976	0.216944	0.259681	0.172466	0.129686	0.0178738	0.346732	0.0740381	-0.059754	-0.230752	-0.0342537	-0.324917
ENSMUSG00000022428	Cby1	-0.104378	0.119204	-0.458251	-0.180173	-0.318502	-0.241064	-0.479434	-0.149382	-0.121549	-0.0960239	-0.471204	-0.170087	-0.32241	-0.0361094	-0.121089	0.434335	0.232256	0.0433113	0.260869	-0.0315322	0.0239438	-0.0190793	0.209443	0.276607	0.270672	0.0612397
ENSMUSG00000022438	Parvb	0.295335	0.336461	0.291682	0.284367	0.613392	0.153156	-0.00367658	-0.133963	0.184912	0.0697039	0.206845	-0.0659335	0.408516	-0.0342923	-0.0260023	0.0703273	0.201164	0.119257	0.0484449	-0.343212	-0.170224	0.239361	-0.0499942	0.114772	-0.365049	-0.0973437
ENSMUSG00000022439	Parvg	0.44011	0.146065	0.194158	0.21084	0.38188	-0.219495	0.0478319	0.0349747	0.217114	0.248771	0.0407026	-0.133666	-0.052074	-0.0262365	-0.0563388	0.214822	0.427088	-0.024164	-0.0854377	-0.367314	-0.00459944	-0.498489	-0.489564	-0.325463	-0.11067	0.27182
ENSMUSG00000022442	Ttll1	-0.160358	0.354966	-0.380141	0.0835359	0.101554	-0.0977802	-0.606489	-0.561659	0.257424	-0.198953	-0.16554	-0.329359	-0.00729716	0.117524	-0.318427	0.692926	0.294373	0.207446	-0.0861122	-0.193135	-0.228644	0.342243	0.322864	0.369558	0.4006	-0.123261
ENSMUSG00000022451	Twf1	-0.0308367	-0.129944	-0.466885	-0.465442	-0.278774	-0.195459	-0.127547	0.107247	-0.137031	-0.0868855	-0.265533	-0.0912005	0.246992	-0.0123425	0.0775584	0.176915	0.233555	0.0822216	0.264285	0.103956	0.363306	-0.00620912	0.271032	0.524899	0.466631	0.0204404
ENSMUSG00000022453	Naga	-0.119001	-0.436619	-0.0285099	-0.446956	-0.302112	-0.133561	-0.107469	0.131208	-0.0447801	-0.0907119	-0.00126185	0.177974	-0.206408	-0.385343	-0.195619	0.113771	0.329805	0.405858	0.549907	0.581122	0.562198	0.295927	0.140834	0.315752	0.388132	0.388378
ENSMUSG00000022454	Nell2	-0.500887	-0.0456397	-0.0906704	0.00598707	-0.0899281	-0.211389	-0.0103167	-0.282166	0.277431	0.252995	0.700423	0.377243	0.23017	0.331309	0.129341	-0.250788	-0.133436	-0.530107	-0.30232	0.184878	-0.287599	0.385893	0.331604	-0.191051	-0.104897	0.135297
ENSMUSG00000022456	2019-09-03	0.454507	0.872276	-0.0483931	0.212773	0.292225	0.0935059	-7.81887e-07	0.0988659	0.458385	0.308088	0.132058	0.363449	0.445428	0.703942	0.497476	0.0666722	0.0155417	-0.289597	-0.22359	-0.533181	-0.403474	-0.148104	0.234788	0.0433942	-0.11899	0.206447
ENSMUSG00000022466	Rpap3	0.302571	0.189611	0.0364449	0.166111	0.224772	0.453606	0.164532	0.134512	0.132959	0.328244	0.116879	0.0308867	0.295687	0.157673	-0.0231152	0.160381	-0.00031777	0.0244556	-0.153091	-0.0689424	0.121047	0.0936976	0.0315073	0.258673	-0.246301	-0.0534338
ENSMUSG00000022471	Xrcc6	-0.0625437	0.339305	0.0786423	0.184741	0.22087	0.195215	-0.106868	-0.265573	0.0435518	-0.0102408	0.182565	-0.0338182	0.254731	0.2557	0.0500193	-0.0340194	-0.148415	-0.301379	-0.419724	-0.384074	-0.472798	-0.0415966	-0.0150635	-0.207751	-0.364926	-0.344747
ENSMUSG00000022472	Desi1	0.334142	0.508038	0.0967812	0.221214	0.0657866	0.316709	0.451564	0.524547	0.309343	0.594923	0.258395	0.610409	0.419575	0.718601	0.643712	-0.146166	-0.309385	-0.316909	-0.171677	0.0245153	0.0680936	-0.0686601	0.321075	0.0833715	-0.0273547	0.131844
ENSMUSG00000022475	Hdac7	0.0822107	0.238647	-0.191845	0.303109	0.22	-0.0311158	0.0902177	-0.368006	-0.0182234	-0.147118	-0.102712	-0.430504	-0.157563	0.109933	-0.0478144	0.485343	0.116835	0.320189	-0.0942894	-0.0800833	0.116177	0.0586762	0.211486	-0.122764	0.211007	-0.312464
ENSMUSG00000022476	Polr3h	-0.00550172	-0.282337	-0.0453012	-0.394544	-0.0849305	0.328593	0.258767	0.0376151	-0.356951	-0.188124	-0.0619054	-0.179336	0.135269	-0.290334	0.0799673	-0.0622456	-0.0637622	0.437552	0.349095	0.426085	0.533581	0.299408	0.247209	0.259864	-0.00178609	-0.357772
ENSMUSG00000022488	Nckap1l	0.188825	-0.0069553	-0.334181	-0.211162	-0.0553829	-0.285503	-0.310809	-0.0705304	-0.26889	-0.218743	-0.622248	-0.405743	-0.450937	-0.352414	-0.146238	0.592862	0.591926	0.407109	0.5033	-0.0951446	0.449907	-0.173695	0.023706	0.325996	0.35582	0.0437849
ENSMUSG00000022489	Pde1b	0.102488	0.503252	0.00585557	0.200434	0.0859098	0.0213423	0.0726387	0.0891362	0.5512	0.298981	0.368588	0.470436	0.426577	0.593892	0.322438	-0.103233	-0.0548382	-0.302003	0.014462	-0.145919	-0.310417	0.248595	0.348761	0.0295725	0.0458415	0.287163
ENSMUSG00000022500	Litaf	0.120269	-0.329628	0.430727	0.0848667	-0.0436044	0.214746	0.397891	0.516402	-0.228432	0.348783	0.0769082	0.214042	-0.0442565	-0.171053	0.0283784	-0.426384	-0.227799	-0.146688	-0.0147032	0.229179	0.216371	-0.307107	-0.387905	-0.148805	-0.269824	0.114047
ENSMUSG00000022503	Nubp1	-0.175451	-0.396813	0.00746711	-0.308283	-0.500436	-0.0656892	0.107942	0.142614	-0.531972	-0.0738266	-0.0971356	0.0362664	-0.212997	-0.328211	-0.0580004	-0.118928	-0.144872	0.342704	0.384407	0.708179	0.531554	0.0498209	0.230439	-0.0521081	0.23664	0.0517585
ENSMUSG00000022505	Emp2	-0.315704	-0.405414	0.153591	-0.0539625	-0.221436	-0.14405	0.258128	-0.0216539	-0.277988	-0.00558429	0.252963	0.0710128	-0.119237	-0.16713	-0.0218	-0.349488	-0.201498	0.065938	0.129041	0.517853	0.163126	0.15503	0.0755865	-0.294194	-0.00872312	0.00900263
ENSMUSG00000022508	Bcl6	-0.367477	-0.223355	0.0423298	0.387926	-0.0563627	-0.232691	0.117481	-0.0827219	0.21915	0.462229	0.528131	0.171465	0.0303474	0.211522	-0.102433	0.0943786	-0.0778079	-0.315769	-0.439847	0.33962	0.0950691	0.121494	0.120264	-0.0934148	0.295565	0.172271
ENSMUSG00000022514	Il1rap	-0.349246	-0.0642207	-0.288148	0.0833216	-0.282179	-0.277206	-0.25307	-0.25326	0.132473	0.0232748	0.00054146	-0.102452	-0.286562	0.162268	-0.182905	0.314372	-0.0733229	0.0148675	-0.333076	0.254844	-0.0394371	0.0116983	0.176708	-0.0941257	0.582542	0.116359
ENSMUSG00000022515	Anks3	0.219753	0.488664	0.0486156	-0.00356028	-0.0274683	0.166122	0.252531	0.245872	0.501847	0.254558	0.319141	0.583999	0.501504	0.614376	0.412919	-0.192404	-0.175436	-0.206471	0.00318957	0.0362754	-0.187121	0.10051	0.366329	0.0989451	0.1779	0.34512
ENSMUSG00000022523	Fgf12	0.068302	0.313465	0.0866945	0.171454	-0.084825	-0.0813596	0.148661	0.0251097	0.367166	0.173144	0.271027	0.33137	0.114494	0.485822	0.230067	-0.00334643	-0.161584	-0.155349	-0.293955	0.0531288	-0.160168	-0.171619	0.166345	-0.212384	0.339209	0.268109
ENSMUSG00000022528	Hes1	-0.36941	0.120905	-0.300786	0.0850634	-0.177333	0.257018	-0.0288152	-0.076992	0.355669	0.209781	0.407284	0.346576	0.290368	0.529898	0.0895353	-0.0436332	-0.424291	-0.310272	-0.475237	0.200744	-0.202197	0.538049	0.527428	0.194954	0.100683	-0.0282126
ENSMUSG00000022533	Atp13a3	0.445956	0.275064	0.447646	0.355418	0.570271	0.297971	0.72571	0.382591	0.533723	0.17928	0.354974	0.255662	0.557059	0.413267	0.517909	-0.309981	-0.0969519	-0.121216	-0.0994418	-0.300811	-0.0779221	-0.0876528	-0.183272	-0.095349	-0.0748217	-0.0666368
ENSMUSG00000022540	Rogdi	0.244291	0.252061	0.521976	0.770813	0.468365	0.0916373	0.361129	0.037546	0.220866	0.336701	0.278127	0.0157682	-0.0309435	0.196159	-0.0590541	-0.039002	-0.0568205	-0.208215	-0.321928	-0.274417	-0.302543	-0.298217	-0.401754	-0.519461	-0.285307	0.0303922
ENSMUSG00000022551	Cyc1	0.0504953	0.19871	0.276185	0.282006	-0.0712554	-0.00185828	0.301932	0.229743	0.342584	0.133219	0.308164	0.485104	0.0204483	0.355013	0.296444	-0.167668	-0.24047	0.0826363	0.0198609	0.300598	-0.0434338	0.105403	0.20414	-0.243775	0.292044	0.344939
ENSMUSG00000022553	Maf1	0.598952	0.231118	0.324525	-0.053302	0.208021	0.0645125	0.283408	0.460113	-0.327003	0.116965	-0.166776	0.0963129	0.229967	-0.107078	0.376249	-0.212444	0.188962	0.128364	0.501334	-0.236173	0.275654	-0.399082	-0.179902	-0.147318	-0.393235	0.00613125
ENSMUSG00000022554	Hgh1	0.28797	0.11138	0.318582	0.047499	0.169122	0.394458	0.216584	0.321568	0.389176	0.169539	0.190285	0.351452	0.286233	0.0789416	0.0914367	-0.158244	-0.102262	0.150576	0.204973	0.111172	0.0579119	0.311433	0.019444	0.250533	-0.108938	0.196555
ENSMUSG00000022557	Bop1	-0.339581	-0.374864	0.0022168	-0.00773585	-0.0746721	0.355895	0.000205498	-0.117247	-0.0556116	-0.131922	0.0501738	-0.202094	0.164004	-0.143959	-0.386323	-0.0221134	-0.354562	0.182685	-0.324931	0.344954	0.0361227	0.371643	0.0464458	0.370403	0.193733	-0.326164
ENSMUSG00000022559	Fbxl6	0.180327	0.0718632	0.254178	0.0444923	0.266318	0.183476	0.420644	0.155122	0.0586514	0.145512	0.295274	0.0734088	0.657741	0.0819206	0.274075	-0.190708	-0.0456266	0.0983705	0.153588	0.13226	0.130925	0.139654	0.0983724	0.10594	-0.0505344	-0.149981
ENSMUSG00000022565	Plec	0.236636	0.364064	0.265068	0.238032	0.300824	0.210239	0.14103	0.0870289	0.589147	0.317497	0.462778	0.409692	0.491674	0.324235	0.0823621	-0.116645	-0.0341051	-0.11055	-0.00924497	-0.061773	-0.268466	0.325048	0.108058	0.0897827	-0.161746	0.322533
ENSMUSG00000022568	Scrib	0.0352213	-0.0865941	-0.483557	-0.561163	-0.504953	0.178462	0.00567406	0.388588	-0.37985	-0.0137239	-0.443508	0.024433	0.0968694	0.137048	0.367588	0.126382	-0.142574	0.0760648	0.0393962	0.219951	0.598244	-0.213762	0.363944	0.500578	0.41797	-0.240582
ENSMUSG00000022571	Pycrl	0.146724	-0.138144	0.199837	-0.235662	-0.0808137	-0.198048	0.00186542	-0.0653063	-0.104529	-0.250895	-0.0881238	-0.030878	-0.172936	-0.45093	-0.21298	0.016836	0.391224	0.523465	0.75648	0.32249	0.190166	0.101392	-0.0419368	0.0125982	0.119674	0.390524
ENSMUSG00000022574	Naprt	-0.146808	-0.0682703	-0.223559	-0.10871	-0.242274	-0.407875	-0.29392	-0.128594	0.00691876	0.0155549	0.0283331	0.019518	-0.0448245	0.0209658	-0.136169	0.291654	0.265835	0.0831903	-0.0286516	0.162504	0.110981	-0.0726998	0.125232	0.0560608	0.425596	0.29863
ENSMUSG00000022577	Ly6h	-0.516203	-0.104162	-0.263044	0.266184	-0.188504	-0.0155133	0.0265876	-0.393386	0.116694	0.0850282	0.345238	-0.0694077	-0.0560248	0.227978	-0.141783	0.180391	-0.272523	-0.0689425	-0.354349	0.406639	-0.0645998	0.45673	0.427392	-0.0928799	0.242117	-0.148117
ENSMUSG00000022586	Ly6i	0.164331	-0.244993	0.181228	-0.193935	-0.0584478	0.275262	0.43439	0.404812	0.040202	-0.0696714	0.0103467	0.136995	0.0569803	-0.0734773	0.272245	-0.144605	-0.125371	0.431845	0.330069	0.409179	0.551998	0.167462	0.0724248	0.0936141	0.224484	-0.0716653
ENSMUSG00000022591	Gm9747	0.145016	0.271503	0.255222	0.151758	0.486464	0.088689	-0.0705406	-0.321841	0.43201	-0.170831	0.190037	-0.123436	0.226815	-0.0152339	-0.123399	0.0831394	0.171825	0.142748	0.073155	-0.296574	-0.286	0.294075	-0.0458142	0.0140474	-0.0515953	-0.078936
ENSMUSG00000022594	Lynx1	-0.159437	0.074707	0.0709311	0.0796656	-0.259989	0.0124352	0.180769	-0.0677225	0.201563	-0.134052	0.151383	0.276207	-0.241396	0.193298	0.18441	-0.0610559	-0.219705	0.164127	0.1052	0.389538	-0.0257557	0.240036	0.351799	-0.0907846	0.358676	0.192929
ENSMUSG00000022602	Arc	-0.26197	-0.0391327	0.00711099	0.243532	-0.144905	0.0680401	0.0281467	0.0961793	0.277259	0.48936	0.398122	0.383401	-0.0111738	0.344728	0.04172	-0.208805	-0.411136	-0.496509	-0.586967	0.177942	-0.250676	0.0708288	0.0431921	-0.10782	-0.0819514	0.247661
ENSMUSG00000022604	Cep97	0.101966	0.241113	0.559415	0.60922	0.647325	0.191477	0.48726	-0.204435	0.419221	0.0713788	0.618395	0.0373359	0.416637	0.193079	0.0266954	-0.189172	-0.0322975	-0.105608	-0.145881	-0.20021	-0.411632	0.189968	-0.177823	-0.448641	-0.341449	-0.160964
ENSMUSG00000022607	Ptk2	-0.179358	0.0346758	0.00984902	-0.000399635	-0.231071	0.0387456	-0.0528509	-0.132581	-0.107125	-0.260592	-0.0249782	0.0114287	-0.244281	0.0497326	0.140194	-0.18326	-0.400761	0.114896	-0.17458	0.117682	-0.143406	0.0522404	0.175219	-0.27511	0.0835458	-0.117303
ENSMUSG00000022614	Lmf2	0.220919	-0.28276	0.298888	-0.35086	0.0140131	0.106617	0.221416	0.420712	0.187619	-0.27929	-0.0287381	0.29485	-0.00340629	-0.254006	0.12647	-0.37103	0.0602073	0.269329	0.312417	0.109306	0.150584	-0.0428	-0.313705	0.101278	0.0895373	0.332684
ENSMUSG00000022617	Chkb	-0.235253	-0.194457	-0.614738	-0.436223	-0.395527	-0.0630166	-0.324133	0.139715	-0.19618	0.155782	-0.166727	0.021912	0.169993	0.114969	0.0196721	0.155295	0.0476752	-0.258043	-0.158688	0.0490764	0.248772	-0.00662607	0.232146	0.448289	0.149009	-0.0563867
ENSMUSG00000022619	Mapk8ip2	0.173069	0.345794	0.164877	0.300001	-0.0049338	-0.0843235	0.0807985	0.141509	0.0779799	0.461626	0.2218	0.33817	-0.0930825	0.382189	0.199631	-0.133912	-0.176262	-0.427022	-0.425643	-0.149906	-0.302703	-0.483033	-0.156784	-0.576628	-0.29749	0.316259
ENSMUSG00000022620	Arsa	0.641705	0.122296	0.215042	-0.200003	0.270521	0.148959	0.115931	0.452149	-0.0996376	0.0738527	-0.325713	-0.0161502	0.126719	-0.156827	0.232384	-0.212356	0.137396	0.0599192	0.236924	-0.435561	0.104877	-0.456016	-0.462833	0.041391	-0.449796	0.0369504
ENSMUSG00000022621	Rabl2	-0.0954232	0.398396	-0.146886	0.489774	0.207231	0.0528635	0.104481	-0.27195	0.319414	0.394342	0.441664	0.0636332	0.146258	0.555381	0.152143	0.381672	-0.0345097	-0.186611	-0.390625	0.00201389	-0.0409715	0.278252	0.428688	-0.17591	0.0376512	-0.15627
ENSMUSG00000022623	Shank3	0.00343996	0.241607	0.262645	0.469525	0.402382	0.0425488	0.153824	-0.0295894	0.557683	0.555594	0.690735	0.334442	0.606415	0.380747	-0.0525106	-0.0686097	0.0473204	-0.431834	-0.351648	-0.0843253	-0.380318	0.187167	-0.0195495	0.0153488	-0.134408	0.296111
ENSMUSG00000022629	Kif21a	-0.3915	0.118093	-0.354178	0.0428892	-0.130245	0.00152398	0.0200468	-0.173633	0.33259	0.0397077	0.318826	0.142743	0.381869	0.56803	0.24111	0.0809609	-0.295034	-0.345915	-0.543978	0.0515566	-0.101119	0.262727	0.518239	0.18206	0.500914	-0.229632
ENSMUSG00000022634	Yaf2	-0.0582068	-0.124464	-0.227362	-0.464837	-0.592121	0.158349	0.188581	0.253536	-0.401625	-0.22849	-0.268361	0.197577	-0.289332	0.0633851	0.400218	-0.129152	-0.354874	0.266442	0.170192	0.480856	0.445884	-0.0476813	0.390012	0.0157103	0.203315	-0.118799
ENSMUSG00000022637	Cblb	-0.045651	0.428855	-0.183911	0.169559	-0.0788194	-0.310701	-0.0951154	0.0216698	0.483899	0.371271	0.355273	0.526958	0.141212	0.642435	0.377171	0.0392076	-0.0262574	-0.469317	-0.387271	-0.108723	-0.305199	-0.0646426	0.3087	-0.0712029	0.239361	0.487889
ENSMUSG00000022639	Dubr	0.47873	0.413606	0.162001	0.0327464	0.337713	0.395411	0.460604	0.420327	0.435768	0.334962	0.272128	0.434391	0.6861	0.466529	0.487275	-0.244605	-0.0595907	-0.248894	0.0512397	-0.258972	-0.00524452	0.0639696	0.123418	0.269889	-0.223954	0.0663382
ENSMUSG00000022641	Bbx	0.060234	-0.161627	0.112287	-0.065034	-0.1189	0.227287	0.341925	0.57788	0.309294	0.224366	0.116642	0.388494	0.357572	0.280616	0.362345	-0.400079	-0.442239	-0.197742	-0.271048	0.149572	0.142233	-0.0570753	-0.011104	0.312404	0.333239	0.110619
ENSMUSG00000022661	Cd200	-0.109999	0.291562	0.178627	0.432412	-0.0657935	-0.188471	0.0697338	-0.142794	0.242851	0.397074	0.48906	0.422978	0.0150525	0.391825	-0.00355256	0.00508797	-0.0972806	-0.191405	-0.248503	0.263321	-0.296192	0.0762959	0.249479	-0.216217	0.0901538	0.489448
ENSMUSG00000022664	Slc35a5	0.251461	-0.11141	0.00476672	-0.00150599	0.363361	-0.039244	0.232972	-0.0313278	-0.0753941	-0.253568	-0.264199	-0.487267	-0.131666	-0.318329	0.0279092	0.312513	0.415991	0.435263	0.508391	-0.124875	0.490559	0.0338976	-0.117597	-0.0265591	0.0968227	-0.376498
ENSMUSG00000022665	Ccdc80	0.118246	0.0334301	0.220943	-0.0279149	0.159999	0.119482	0.304931	0.367813	0.352479	0.337791	0.44993	0.504258	0.573528	0.278701	0.418818	-0.425073	-0.13758	-0.287588	0.00371863	-0.0106035	0.0653653	0.230801	0.132148	0.244172	-0.12394	0.147696
ENSMUSG00000022671	Mzt2	-0.282803	-0.208635	-0.165609	-0.184844	-0.0751826	-0.245943	-0.115145	-0.202331	0.243143	-0.353789	0.0658403	-0.0236289	-0.163456	-0.0531741	-0.0833482	0.0521479	0.113892	0.245801	0.0523255	0.202008	-0.031667	0.278273	0.091095	-0.013939	0.458437	0.150892
ENSMUSG00000022673	Mcm4	0.427408	0.299202	0.175407	0.211952	0.246071	0.154058	0.366642	0.336696	0.0810732	0.268755	0.157423	0.188768	0.363854	0.350174	0.375054	-0.0339075	0.0314018	-0.235565	-0.269287	-0.355255	0.10538	-0.467678	-0.127008	-0.171077	-0.125988	-0.0367742
ENSMUSG00000022678	Nde1	-0.0866313	0.0237164	-0.629278	-0.2259	-0.214838	-0.0750944	-0.337042	-0.0443194	-0.108807	0.248162	-0.154464	-0.1411	0.0722293	0.120154	-0.0018903	0.480098	0.18272	-0.0664459	-0.116231	0.0435863	0.351486	0.0756203	0.362023	0.391619	0.202328	-0.0636572
ENSMUSG00000022679	Mpv17l	0.430598	0.399866	0.267012	0.563933	0.53954	0.00043032	0.168033	-0.0172035	0.0418665	0.212693	-0.0489335	-0.300045	0.326388	0.10963	-0.0882997	0.299355	0.298421	-0.0686148	-0.076836	-0.517089	-0.110422	-0.407811	-0.287776	-0.0744465	-0.0727979	-0.167413
ENSMUSG00000022680	Pdxdc1	0.103947	-0.0925533	-0.0289878	0.0374166	0.089495	-0.0950944	-0.113494	-0.0830168	-0.241614	-0.0344927	-0.29912	-0.367502	-0.182702	-0.310796	-0.4063	0.332356	0.315161	0.373738	0.155511	0.103316	0.162792	-0.14813	-0.183851	0.136233	0.197936	0.0812317
ENSMUSG00000022681	Ntan1	-0.270346	-0.149704	-0.0267971	0.386259	0.301219	-0.387029	-0.122309	-0.506333	0.072195	0.0614596	0.368463	-0.347007	0.0156134	-0.150211	-0.358756	0.347707	0.38082	-0.031515	-0.0646585	-0.0644755	0.0127638	0.263351	-0.0076378	-0.259155	-0.0253139	-0.128897
ENSMUSG00000022685	Parn	0.312817	0.417828	0.0283	0.0967658	0.126359	-0.00808877	0.281958	0.423273	0.346314	0.352046	0.275719	0.548115	0.334442	0.566507	0.711894	-0.177528	-0.075212	-0.339794	-0.143208	-0.236868	0.0258218	-0.170775	0.178805	-0.129981	-0.0456749	0.213142
ENSMUSG00000022687	Boc	0.0719293	0.3428	0.0504853	0.264434	0.214768	0.374629	0.250474	-0.120983	0.181687	0.0619166	0.302405	0.0845689	0.186042	0.371251	0.310018	0.052345	-0.175614	-0.087196	-0.242355	-0.152241	-0.0995303	0.187624	0.231286	-0.196607	-0.30195	-0.344613
ENSMUSG00000022696	Sidt1	-0.307748	-0.254932	-0.242429	-0.137576	-0.0334885	-0.172525	-0.361219	-0.291256	-0.252558	-0.162896	-0.177361	-0.327044	-0.0935196	-0.369883	-0.491603	0.368436	0.410024	0.192229	0.257831	0.159626	0.117297	0.240898	0.0472082	0.349108	0.182538	-0.0665265
ENSMUSG00000022701	Ccdc191	0.0553703	0.149041	-0.107329	-0.221638	-0.0634828	-0.0938837	0.135195	0.195165	0.107898	-0.0315665	0.109092	0.271132	0.268694	0.284195	0.521368	-0.284425	-0.0967985	-0.155609	0.159732	-0.102893	0.0120908	0.0485659	0.224101	-0.143729	-0.0394146	-0.0298025
ENSMUSG00000022702	Hira	-0.063256	-0.018578	-0.156964	-0.415665	-0.223413	-0.01067	-0.102588	0.232813	0.0468179	0.119737	0.128596	0.389518	0.344048	0.0651439	0.298773	-0.0108367	0.0810364	0.153301	0.386285	0.390247	0.410447	0.431956	0.524773	0.513925	0.281046	0.185105
ENSMUSG00000022710	Usp7	0.014606	-0.0839473	-0.196568	-0.405127	-0.47663	0.384557	0.35221	0.622259	-0.0870792	0.0705427	-0.0440299	0.485161	0.22462	0.333972	0.652687	-0.384953	-0.556068	-0.103375	0.0150332	0.321921	0.422204	0.0754581	0.417521	0.228924	0.109881	-0.14007
ENSMUSG00000022718	Dgcr8	0.0429363	0.0940257	0.225247	0.111387	0.158462	-0.246618	0.430748	0.0885158	0.34213	0.209009	0.546965	0.372867	0.324233	0.249625	0.388021	-0.1632	0.168569	-0.0747689	0.268001	0.212193	0.14769	0.154188	0.234635	-0.219883	0.225406	0.278291
ENSMUSG00000022747	St3gal6	0.147445	-0.0854202	0.119028	-0.107865	0.212999	-0.253821	0.0385038	-0.220737	-0.0361845	-0.461489	-0.205996	-0.327527	-0.37742	-0.379231	-0.117804	0.0623905	0.404784	0.348828	0.398425	-0.163744	0.0194839	-0.15605	-0.293584	-0.293233	0.068439	0.0447983
ENSMUSG00000022749	Tbc1d23	0.204916	0.0374822	0.166517	-0.304915	-0.23968	-0.100455	-0.091966	0.123479	-0.141453	-0.0204251	-0.0879518	0.248751	-0.112415	-0.264506	-0.0394255	-0.095041	0.245337	0.282285	0.712335	0.273855	0.128245	0.036081	0.0614979	0.0413048	-0.0983453	0.480827
ENSMUSG00000022750	Klhl22	0.234002	0.216543	0.187777	0.261429	0.455578	-0.316432	-0.00412742	-0.212314	0.0172636	0.0571926	0.150922	-0.173174	0.146271	-0.11812	-0.0537716	0.285507	0.622356	0.101431	0.402634	-0.307358	0.10544	0.00926915	-0.0428366	-0.135112	-0.136419	0.00765435
ENSMUSG00000022760	Thap7	-0.0141065	0.539291	-0.074461	0.339935	0.146328	-0.0778994	-0.0097989	-0.0480711	0.399665	0.563087	0.398928	0.358005	0.410943	0.656973	0.311689	0.100168	-0.0347445	-0.555847	-0.324186	-0.180792	-0.349939	0.0392066	0.300485	0.0129429	-0.0605507	0.131898
ENSMUSG00000022765	Snap29	0.118195	0.0686926	0.372733	0.0488984	0.144246	0.18626	0.336566	0.438432	0.452784	0.531627	0.576056	0.669283	0.651725	0.361824	0.204377	-0.588771	-0.214099	-0.45721	-0.154891	0.0725888	-0.279276	0.0635084	-0.108934	0.0889486	-0.22737	0.45091
ENSMUSG00000022774	Ncbp2	-0.220049	-0.230141	-0.0784518	0.176844	0.26254	0.146487	-0.150376	-0.408711	0.0463012	-0.440801	-0.140305	-0.548421	-0.228061	-0.285717	-0.478969	0.508282	0.160259	0.42471	-0.148867	-0.0284043	0.144182	0.329662	-0.0573283	0.171935	0.292554	-0.488254
ENSMUSG00000022789	Dnm1l	0.304991	-0.0583506	0.280055	0.0318662	-0.0252997	-0.0537542	0.241092	0.22266	-0.257819	-0.249967	-0.26901	-0.098295	-0.190055	-0.311838	0.0186377	-0.0245352	0.101859	0.535664	0.563632	0.174642	0.351674	-0.147771	-0.0893241	-0.169585	0.174807	0.071879
ENSMUSG00000022790	Igsf11	0.00961742	-0.127244	0.261948	0.133341	0.399346	0.138828	-0.0280824	-0.230546	0.175642	-0.149125	0.17163	-0.279426	0.339597	-0.268933	-0.352548	0.178041	0.162502	0.336475	-0.0780934	0.017336	0.0145986	0.264737	-0.149035	0.269462	0.149207	-0.159407
ENSMUSG00000022797	Tfrc	-0.102622	0.245341	-0.16646	0.276951	0.137279	0.0833566	0.258114	-0.252732	-0.0798486	-0.0485297	0.135859	-0.17608	0.0664467	0.28594	0.333782	0.0496328	-0.228698	-0.00412841	-0.148765	-0.0449419	-0.0119372	0.235492	0.410635	-0.229093	-0.0815198	-0.473879
ENSMUSG00000022800	Fyttd1	0.225627	-0.00894458	0.241779	0.423605	0.102815	0.101168	0.453992	0.406922	-0.0347005	0.623954	0.287879	0.206694	0.259078	0.259447	0.116089	-0.12604	-0.174795	-0.231077	-0.376735	0.0977871	0.19383	-0.327539	-0.145942	-0.11412	-0.100719	0.147038
ENSMUSG00000022801	Lrch3	-0.434179	-0.318257	-0.129042	-0.207784	-0.24198	-0.176312	-0.0507503	0.0242077	0.153229	-0.0516658	0.182379	0.227232	0.00756127	0.0788982	0.0282674	-0.314478	-0.210672	-0.197558	-0.204753	0.270921	-0.208906	0.15375	0.0135683	0.0311952	0.225131	0.191175
ENSMUSG00000022807	Osbpl11	0.269873	0.721881	-0.022772	0.38681	0.156405	-0.302713	-0.0179741	-0.0698139	0.276275	0.42799	0.269503	0.336017	0.120384	0.545968	0.292227	0.218096	0.206317	-0.247205	-0.0144887	-0.222972	-0.24905	-0.132539	0.290768	-0.337368	-0.0596131	0.410237
ENSMUSG00000022811	Zfp148	-0.3431	-0.0451212	-0.227441	-0.257926	-0.316283	0.334179	-0.0539249	0.204352	0.254626	0.100478	0.137305	0.440947	0.216306	0.346444	0.239516	-0.207519	-0.445696	-0.205776	-0.10902	0.310594	-0.00720992	0.535148	0.467772	0.470254	0.160717	-0.072932
ENSMUSG00000022814	Umps	0.279142	-0.0895282	-0.140045	-0.0329599	0.207462	-0.148177	-0.0203655	0.0351103	-0.0458256	-0.355975	-0.488556	-0.519167	-0.116647	-0.278388	-0.0586504	0.362524	0.399954	0.344437	0.28419	-0.357467	0.352002	-0.228006	-0.222156	0.160199	0.343897	-0.240607
ENSMUSG00000022817	Itgb5	0.0073488	-0.346517	-0.147315	-0.301099	-0.301124	-0.0845438	0.0442573	0.166452	-0.445736	0.0212281	-0.336596	-0.203714	-0.307355	-0.299967	-0.133412	-0.0472276	-0.0432354	0.144371	0.156917	0.296538	0.387129	-0.266241	-0.102245	-0.0252754	0.111412	0.025981
ENSMUSG00000022828	Gtf2e1	0.282837	0.0237778	0.242614	0.10043	0.294857	0.111651	0.452982	0.367557	0.56439	-0.0957573	0.111285	0.231233	0.217883	0.164249	0.334025	-0.211312	0.00107386	0.159544	0.200233	-0.0747104	0.0626165	0.136657	-0.10214	0.119771	0.273128	0.157411
ENSMUSG00000022841	Ap2m1	-0.0187777	0.39802	-0.281102	0.0124669	-0.339644	-0.213942	-0.155089	-0.00235184	-0.0386169	0.47608	0.103809	0.335764	0.0230783	0.460313	0.219787	0.158558	0.0582456	-0.453123	-0.0249245	0.013895	-0.0441773	-0.170325	0.410945	-0.0483153	-0.0102364	0.283766
ENSMUSG00000022848	Dirc2	0.324761	0.362237	-0.0134121	0.0334827	0.222516	0.195211	0.367856	0.363172	0.0339158	0.322148	0.193907	0.314939	0.511152	0.465329	0.694611	-0.143017	-0.0571906	-0.302439	-0.102333	-0.28897	0.145044	-0.13731	0.185125	0.0227166	-0.331429	-0.201686
ENSMUSG00000022856	Tmem41a	-0.0799484	0.176337	-0.194799	-0.0986796	-0.110098	0.10246	-0.112237	0.0748309	0.486697	-0.287088	-0.0918239	0.195792	0.0250466	0.332071	0.28111	-0.0652042	-0.266484	0.0061306	-0.141135	-0.125243	-0.213346	0.229118	0.237995	0.216815	0.451686	0.0234124
ENSMUSG00000022861	Dgkg	-0.265451	-0.155336	0.359555	0.30591	0.0205356	-0.0722735	0.174787	0.0162293	0.462131	0.360187	0.667235	0.402913	0.319597	0.22787	-0.147164	-0.30556	-0.258462	-0.357828	-0.484724	0.289217	-0.314931	0.0937489	-0.100173	-0.117384	0.204309	0.399065
ENSMUSG00000022864	D16Ertd472e	0.0165441	-0.052429	-0.128835	-0.166247	0.051773	0.283499	-0.0624406	-0.162814	-0.190357	-0.389808	-0.238531	-0.312085	-0.183848	-0.174875	0.00910604	0.0382806	-0.0413024	0.0644927	0.000733366	-0.322116	0.0668946	0.0592981	-0.0354816	-0.0209003	-0.322384	-0.528708
ENSMUSG00000022876	Samsn1	0.484253	0.182463	0.316587	0.15038	-0.0191202	0.250385	0.382804	0.540365	-0.270587	0.283525	-0.020824	0.294732	0.0765139	0.129389	0.379188	-0.234072	-0.20343	-0.0247103	-0.137371	-0.0589796	0.196445	-0.558312	-0.18143	-0.240219	-0.312289	0.120217
ENSMUSG00000022889	Mrpl39	0.296947	0.386181	-0.155292	0.0627413	0.0272868	0.261545	0.266297	0.254896	-0.113628	0.260654	-0.0428349	0.0789192	0.465782	0.468176	0.387027	0.0281709	-0.203576	-0.220008	-0.230706	-0.218438	0.17252	-0.228772	0.290333	0.15253	-0.0197122	-0.287635
ENSMUSG00000022895	Ets2	0.304899	0.560873	-0.284777	0.200372	0.22843	0.0675673	-0.0784045	-0.167801	0.0739931	-0.0505876	-0.30719	-0.26083	0.0201953	0.316787	0.0767934	0.463867	0.15791	0.130998	-0.181995	-0.394956	-0.170066	-0.200637	0.120632	0.116892	0.129435	-0.118746
ENSMUSG00000022897	Dyrk1a	-0.0810792	0.457351	-0.160419	0.0872935	0.0602438	-0.356522	-0.381611	-0.443561	0.433942	-0.180065	0.0750877	0.0770121	-0.156417	0.199582	0.0530828	0.249647	0.232524	0.0760393	0.140198	-0.146127	-0.412214	0.292534	0.336337	-0.0539623	0.289099	0.337016
ENSMUSG00000022898	Dscr3	-0.0920174	-0.16482	-0.164871	-0.123867	-0.232845	0.420952	0.305985	0.333227	-0.218082	0.282917	0.164531	0.223801	0.207953	0.271431	0.343876	-0.188694	-0.4141	-0.190213	-0.320285	0.235202	0.371415	0.0858288	0.260922	0.126834	-0.212937	-0.325766
ENSMUSG00000022899	Slc15a2	-0.233574	0.337401	-0.535444	0.0793219	-0.215479	-0.00669213	-0.468439	-0.217988	0.0573187	0.203598	-0.0319243	0.0622243	0.0192552	0.414678	-0.0625779	0.463675	-0.00253028	-0.195099	-0.350143	-0.0565843	-0.127472	0.213412	0.49368	0.300614	0.166903	-0.00543333
ENSMUSG00000022901	Cd86	0.177002	-0.19943	0.157404	-0.0824529	0.0575416	0.0777353	0.230448	0.197569	0.237668	-0.15075	-0.0980018	-0.003429	-0.0403219	-0.182724	-0.00547331	-0.0551959	0.102244	0.186509	0.229083	0.0472716	0.18596	-0.0144613	-0.18664	0.238759	0.2814	0.162043
ENSMUSG00000022906	Parp9	0.100183	-0.17378	-0.095533	-0.0428805	0.185208	0.128433	0.0213483	-0.181611	0.019803	-0.562228	-0.462548	-0.569618	-0.345949	-0.397237	-0.267704	0.346036	0.190825	0.749694	0.380916	0.0539051	0.253672	0.279718	-0.0649452	0.240987	0.352449	-0.268442
ENSMUSG00000022911	Arl13b	0.498399	0.46003	-0.0748544	0.152998	0.405242	0.274992	0.0475096	0.0274783	-0.160878	0.0582656	-0.316694	-0.343717	0.146998	0.122726	0.174719	0.360314	0.240717	0.0442547	0.0309533	-0.597089	0.100134	-0.293067	-0.0940184	0.0112713	-0.388036	-0.482099
ENSMUSG00000022912	Pros1	-0.0115583	-0.0576202	0.104703	0.35008	0.314724	0.119849	0.347322	-0.216422	0.0641146	-0.218877	0.138102	-0.327959	0.0578715	-0.0204036	-0.0201734	0.113381	-0.108974	0.35347	-0.149477	0.0662024	0.111462	0.236138	0.0631212	-0.118837	0.150891	-0.372257
ENSMUSG00000022935	Grik1	-0.293221	-0.15801	-0.245196	-0.157923	0.00164071	-0.22365	-0.444799	-0.322731	0.146132	0.0637796	0.227412	-0.102389	0.17369	-0.111806	-0.27576	0.440952	0.375804	0.132075	-0.0728351	0.192711	0.214275	0.374176	0.247088	0.363013	0.38294	0.0848221
ENSMUSG00000022946	Dopey2	0.227815	0.155915	0.461045	0.155481	-0.151287	0.146484	0.346586	0.384184	0.0453168	0.183003	0.206278	0.553823	0.0776207	0.17476	0.191337	-0.467642	-0.373642	-0.0261288	-0.0316014	0.246223	-0.121542	-0.193221	-0.0069743	-0.171569	-0.0205347	0.47068
ENSMUSG00000022957	Itsn1	-0.231808	0.174271	-0.332125	0.01542	0.103792	-0.0714389	0.00485081	-0.233304	0.157094	-0.0474639	0.250303	0.00166026	0.193917	0.325052	0.347819	0.107244	0.0108263	-0.0838402	-0.00518252	-0.0666134	0.0574999	0.481577	0.527028	-0.0278471	0.0596671	-0.327693
ENSMUSG00000022961	Son	0.135324	0.0951872	0.0982694	-0.0512921	0.231553	0.072152	0.176851	0.0310038	0.264682	-0.199306	0.0960417	0.0332364	0.206426	0.0155797	0.263446	0.202765	0.197819	0.524184	0.382802	0.193716	0.3868	0.403821	0.315272	0.239838	0.442146	-0.0915869
ENSMUSG00000022967	Ifnar1	-0.1163	-0.0968343	0.307826	-0.055684	-0.153389	0.058159	0.231539	0.367993	0.14832	0.367696	0.518917	0.711601	0.208892	0.182233	0.273137	-0.553071	-0.275038	-0.250179	-0.0294562	0.405566	-0.0367669	0.166776	0.108179	-0.0879731	-0.1251	0.454059
ENSMUSG00000022983	Scaf4	0.139545	0.421827	0.0103778	0.145931	0.151564	0.206702	0.40593	0.177693	0.202066	0.295397	0.330338	0.298074	0.671828	0.544244	0.554176	-0.145259	-0.192107	-0.255913	0.0791734	-0.0459588	0.0559939	0.238459	0.49559	0.0915829	-0.0354674	-0.2249
ENSMUSG00000022994	Adcy6	-0.14133	0.211634	0.162275	0.209568	0.011922	-0.185737	0.152081	-0.25666	0.302427	0.0431472	0.457794	0.299825	0.0103386	0.275714	0.0811673	-0.18593	-0.0140246	-0.209582	-0.0275453	0.0806842	-0.480176	0.0952745	0.0816745	-0.443689	-0.108812	0.322366
ENSMUSG00000022999	Lmbr1l	0.176686	0.174689	-0.00577395	0.380172	0.104569	-0.124418	0.137263	0.179004	0.0224907	0.301635	0.00774465	-0.0352456	0.207045	0.294062	0.11619	0.210555	0.0525058	-0.193369	-0.339148	-0.219316	0.0642906	-0.424818	-0.0939851	-0.0631724	0.200142	-0.011807
ENSMUSG00000023007	Prpf40b	0.063789	0.307678	0.0388329	0.242469	0.123755	-0.0999843	0.0436447	-0.314607	0.0246831	-0.0719455	0.165299	-0.05438	-0.171508	0.0618886	0.047319	0.301125	0.226849	0.281967	0.266226	0.0569065	0.128983	0.240086	0.361372	-0.298501	0.0698495	5.01225e-05
ENSMUSG00000023008	Fmnl3	-0.273934	-0.085198	0.127308	0.24582	0.183383	-0.239494	-0.0773102	-0.159912	0.543102	0.362732	0.688981	0.306185	0.403575	0.134046	-0.232044	0.0362887	0.208568	-0.184473	-0.0791123	0.226951	-0.155333	0.507247	0.126379	0.127217	0.160646	0.42269
ENSMUSG00000023011	Faim2	-0.201482	0.438382	-0.38842	0.0843863	-0.128235	-0.347759	-0.341577	-0.445148	-0.0299464	-0.014316	0.0576462	-0.0160021	-0.123761	0.27513	0.241285	0.299178	0.10409	-0.136909	0.0644187	-0.122824	-0.175699	0.204783	0.555757	-0.216041	-0.0093057	-0.0651939
ENSMUSG00000023015	Racgap1	0.0275943	-0.175459	0.00467761	0.00548352	0.179777	0.03567	-0.0528024	-0.217279	0.0382485	-0.49858	-0.295151	-0.428184	-0.407632	-0.442524	-0.18171	0.366038	0.288255	0.693799	0.540086	0.0779671	0.377344	0.449987	0.0706024	0.188363	0.275067	-0.247564
ENSMUSG00000023017	Asic1	-0.123344	0.0403924	0.250543	0.406085	0.252313	-0.0222965	0.141135	0.0227016	0.689013	0.368659	0.631048	0.34011	0.481262	0.394673	-0.0302859	-0.0738399	-0.111623	-0.32199	-0.541847	0.029884	-0.30249	0.156915	-0.0578248	0.0629973	0.269661	0.284593
ENSMUSG00000023018	Smarcd1	0.286305	0.160446	-0.0255485	-0.144217	0.0386607	0.409908	-0.0200042	0.476965	0.222191	0.122755	-0.165809	0.315508	0.308368	0.201465	0.25119	-0.0943017	-0.202878	0.00168292	-0.124929	-0.137823	0.0543903	0.069888	0.0451418	0.627533	0.00160823	0.0693316
ENSMUSG00000023019	Gpd1	-0.107534	0.247536	-0.27473	-0.072962	-0.05639	0.09579	-0.159612	-0.110782	0.248027	0.292237	0.268989	0.250035	0.384055	0.34649	0.0309722	0.246127	0.000419438	-0.000155726	-0.162873	0.268821	0.0317363	0.434973	0.553223	0.497466	0.261542	0.183347
ENSMUSG00000023020	Cox14	0.262133	0.168716	0.391479	0.0597209	0.0388152	0.450191	0.532207	0.559153	0.145487	0.588704	0.491862	0.708124	0.5954	0.425161	0.371867	-0.568737	-0.360967	-0.478485	-0.233177	0.0911407	-0.0627272	-0.132703	-0.00194976	0.0495288	-0.41244	0.247653
ENSMUSG00000023021	Cers5	0.00430672	-0.233241	-0.0185488	-0.131297	-0.0442564	-0.118839	0.168101	0.183828	-0.201697	-0.021916	0.0532253	0.0353696	-0.0268851	-0.121351	0.271931	0.123144	0.206954	0.233335	0.245443	0.220459	0.643849	0.0417079	0.161522	0.0175818	0.189557	-0.126448
ENSMUSG00000023025	Larp4	0.00319935	-0.179002	0.187958	0.0295634	0.141555	0.112341	0.311747	-0.149462	-0.225103	-0.174944	-0.0206849	-0.349826	0.095689	-0.231672	-0.140874	0.0193112	0.0257672	0.182809	0.14329	0.111718	0.219995	-0.0276264	-0.059491	-0.00741998	0.0793633	-0.392226
ENSMUSG00000023027	Atf1	-0.158887	-0.211251	-0.409599	-0.446821	-0.290051	-0.0124145	-0.129924	0.133146	0.0624452	-0.0575369	-0.177113	0.0939909	-0.223116	0.0178843	0.120724	0.231244	0.098974	0.223316	0.17913	0.352197	0.495446	0.273307	0.344122	0.424027	0.492959	0.0595047
ENSMUSG00000023044	Csad	-0.241121	0.20751	-0.0752493	0.353163	0.0534892	-0.487903	-0.0143176	-0.320371	0.149426	0.366349	0.408032	0.0473179	0.116774	0.270694	0.0912832	0.182136	0.128442	-0.255664	0.0307203	0.138609	-0.0430322	0.210027	0.404927	-0.234975	0.211803	0.108691
ENSMUSG00000023067	Cdkn1a	-0.326618	-0.21958	-0.242764	-0.0629195	-0.212149	0.548466	-0.0246277	0.14775	-0.0875718	0.0597093	-0.0328125	0.0689404	0.00342096	0.127715	-0.0648207	0.129718	-0.382812	0.00259202	-0.384738	0.315841	0.26972	0.365146	0.284151	0.456237	0.129312	-0.393891
ENSMUSG00000023068	Nus1	0.232887	0.178762	-0.0319275	0.172686	0.0712422	0.213527	0.383268	0.46236	0.202823	0.726452	0.299991	0.366747	0.432862	0.57363	0.369209	-0.140024	-0.20433	-0.576984	-0.475438	-0.11813	0.0766823	-0.30705	-0.0202615	-0.00427146	-0.205349	0.0721851
ENSMUSG00000023075	Akirin1	0.23859	0.0288637	0.28524	0.0592971	0.0019582	0.474855	0.585376	0.541686	0.12726	0.521316	0.371703	0.513781	0.374969	0.39657	0.327042	-0.518366	-0.421162	-0.489717	-0.38497	0.0362925	0.00013237	-0.273711	-0.146614	-0.102698	-0.37929	0.105934
ENSMUSG00000023079	Gtf2ird1	0.010424	0.208994	0.0474663	0.176562	-0.10708	0.196399	0.38869	0.419657	0.216131	0.418477	0.35994	0.611456	0.200374	0.635186	0.576134	-0.290932	-0.388381	-0.50907	-0.316057	0.0128393	0.0112087	-0.0516519	0.233788	-0.180591	-0.129572	0.0162128
ENSMUSG00000023088	Abcc1	0.227192	0.325368	0.210778	0.173259	-0.04333	-0.329204	-0.0736324	0.144874	0.164075	0.174731	0.018435	0.291633	-0.0172865	0.121383	0.077206	-0.0253789	0.181469	-0.0011113	0.290951	-0.022721	-0.166395	-0.215964	-0.00479823	-0.169804	0.202518	0.579525
ENSMUSG00000023140	Reg2	0.0934218	0.253454	-0.301429	0.126482	0.10317	-0.470688	-0.270813	-0.289145	-0.219158	0.00537373	-0.294197	-0.385072	-0.283981	-0.0636961	-0.109105	0.573463	0.599981	0.0328508	0.339431	-0.294496	0.115573	-0.2343	0.0493314	-0.202794	0.0579718	-0.0488525
ENSMUSG00000023147	Wrb	0.235005	0.403355	0.361177	0.323562	0.30462	-0.133978	0.161398	0.106646	0.192666	0.627218	0.606111	0.446165	0.608754	0.311745	0.226984	-0.155103	0.143943	-0.345575	-0.00223344	-0.0705581	-0.134736	-0.0240041	0.112867	-0.140348	-0.294924	0.36024
ENSMUSG00000023156	Rpp14	-0.00185133	0.0903776	-0.0489935	0.0922253	0.405129	-0.196509	0.0610249	-0.150074	0.363843	-0.0571056	0.217414	-0.146292	0.406561	0.177171	0.142222	0.0621006	0.266666	-0.199269	-0.10716	-0.406335	-0.183169	0.00653421	-0.117823	-0.0835808	0.0716611	-0.182165
ENSMUSG00000023192	Grm2	0.0836016	0.259782	0.0718204	0.458475	0.495421	0.0501542	0.100437	-0.0271219	0.435404	0.285392	0.381734	0.0980419	0.426877	0.262397	0.125449	0.226043	0.183029	-0.0139849	-0.0563254	-0.153712	0.0307682	0.458693	0.235486	0.269513	0.0336653	-0.0287416
ENSMUSG00000023224	Serping1	-0.308936	0.191001	-0.432799	-0.1463	-0.451529	0.145757	-0.0447946	-0.0319919	0.198505	-0.184399	-0.0870784	0.220941	-0.0618199	0.467652	0.356923	0.10139	-0.43776	0.070376	-0.0795146	0.322679	0.0353862	0.42163	0.727916	0.271875	0.577024	-0.140456
ENSMUSG00000023235	Ccl25	0.0889381	0.0724194	0.123933	0.0316988	0.0730868	-0.0293399	0.241072	0.188398	0.506289	0.0116582	0.220361	0.299211	0.149407	0.265819	0.35246	-0.0380807	-0.0565048	0.0975633	-0.0772186	0.132968	0.110911	0.0663568	0.127821	0.0997841	0.537331	0.232059
ENSMUSG00000023259	Slc26a6	0.0840822	0.176594	0.0298554	-0.00567385	0.119939	0.315607	0.0940599	0.300323	0.187664	0.0880152	0.0197474	0.25456	0.24633	0.258137	0.314417	-0.230835	-0.296895	-0.142496	-0.036787	-0.136103	-0.0899995	0.205984	0.0886426	0.0965011	-0.218971	-0.184472
ENSMUSG00000023272	Creld2	0.710244	0.271852	0.528191	0.368323	0.499058	0.162346	0.498015	0.390862	0.0939155	0.190252	0.00242432	0.0136395	0.196338	0.0362747	0.221593	-0.0302114	0.109912	0.270752	0.0114022	-0.217039	0.105764	-0.501662	-0.450313	-0.264685	-0.147132	0.123291
ENSMUSG00000023274	Cd4	-0.0911608	-0.463649	-0.164435	-0.380942	-0.399825	0.0297377	0.0320478	0.16069	-0.447622	-0.260568	-0.425751	-0.230194	-0.270747	-0.376201	-0.207503	0.197746	0.111724	0.41129	0.325065	0.442222	0.621453	-0.11638	0.0283603	0.311243	0.488886	-0.109401
ENSMUSG00000023286	Ube2j2	-0.230003	-0.0519197	-0.159778	-0.395443	-0.556861	0.377848	0.13951	0.338292	-0.138376	0.0261061	0.0406994	0.435178	0.306595	0.33972	0.454285	-0.38806	-0.691788	-0.140866	-0.22868	0.434254	0.151087	0.136115	0.503947	0.324251	0.232045	-0.169349
ENSMUSG00000023328	Ache	-0.27099	-0.242561	0.00802735	-0.409699	-0.357836	0.201148	0.0814501	0.170438	0.110487	-0.0400649	0.261321	0.468496	0.259447	0.0520867	0.124373	-0.326609	-0.224733	-0.0484059	0.18651	0.461058	0.181915	0.462833	0.393413	0.43375	0.197667	0.12071
ENSMUSG00000023330	Dtwd1	0.193584	0.370615	-0.16041	-0.119993	-0.356909	0.301462	0.317526	0.407068	-0.357331	0.335907	-0.0432468	0.38834	0.161847	0.511904	0.633137	-0.161734	-0.389951	-0.235559	-0.0424892	0.126814	0.269436	-0.248192	0.472183	-0.0863998	-0.178026	-0.15986
ENSMUSG00000023336	Wfdc1	-0.177256	0.191151	0.1843	0.475931	0.354388	0.246746	0.187409	-0.250085	0.588641	0.205641	0.626179	0.206421	0.340985	0.413561	-0.0849203	-0.0451536	-0.176715	-0.205721	-0.462094	-0.00452148	-0.474538	0.463946	0.0958684	-0.0277477	-0.115927	0.0135537
ENSMUSG00000023348	Trip6	0.393132	0.148188	-0.0498991	-0.270674	0.0050817	0.241262	0.370011	0.440693	-0.13749	0.153422	-0.0172302	0.205528	0.383776	0.223388	0.555588	-0.182871	0.0213411	-0.128682	0.181474	-0.18458	0.379495	-0.219789	0.117843	0.0880177	-0.248233	-0.165372
ENSMUSG00000023456	Tpi1	-0.308685	-0.534064	0.092012	-0.316546	-0.458687	0.285587	0.35503	0.130127	-0.106358	-0.313483	0.132296	0.192926	-0.291082	-0.167963	0.0887131	-0.335001	-0.47369	0.335865	0.0704605	0.735003	0.39508	0.32268	0.207633	-0.0939198	0.250982	-0.0824201
ENSMUSG00000023473	Celsr3	0.395105	0.166861	-0.0796275	-0.182748	-0.0824205	0.0972029	0.282407	0.450178	-0.261211	0.46675	-0.0630817	0.141356	0.436933	0.209567	0.406909	-0.118757	-0.0048032	-0.257271	0.0706976	-0.0706466	0.388317	-0.420311	0.11653	0.186574	-0.103898	0.00517203
ENSMUSG00000023495	Pcbp4	-0.0534217	0.0261978	-0.403403	0.0014964	-0.0693222	-0.172211	-0.0479398	0.0962054	0.0526517	0.217382	-0.122778	-0.0476117	0.131874	0.138565	0.162313	0.208562	0.0687574	-0.0749649	0.134138	0.0587419	0.27215	0.216787	0.371311	0.441879	0.325856	0.00164677
ENSMUSG00000023737	1700082M22Rik	0.502699	0.422341	0.174243	0.314481	0.0436352	0.0523538	0.448251	0.363798	-0.168106	0.34095	-0.138753	0.0978899	0.0806955	0.270785	0.440907	-0.0877854	-0.14039	0.0411025	0.172449	-0.031591	0.132029	-0.404482	0.0796651	-0.183068	-0.0616623	0.0963101
ENSMUSG00000023791	Pigx	-0.375995	-0.182021	-0.188795	0.04337	0.132905	-0.215613	-0.310168	-0.299789	0.453504	-0.159936	0.187631	-0.057213	-0.175981	-0.0765087	-0.133624	0.304882	0.246	0.145284	0.072994	0.0819027	0.0658579	0.655983	0.211998	0.191252	0.364068	0.0177849
ENSMUSG00000023800	Tiam2	0.272311	0.35998	-0.107915	-0.0330689	-0.0898685	-0.0327916	-0.123255	0.0530649	-0.0517522	-0.0787491	-0.249613	0.0140321	-0.103467	0.206804	0.247302	0.149219	-0.0177932	0.071261	-0.248099	-0.245142	-0.105568	-0.473893	-0.0221328	-0.125462	0.116404	0.102069
ENSMUSG00000023809	Rps6ka2	0.142564	0.335933	0.241888	0.396419	0.170869	0.0324865	0.131034	0.0352423	0.457617	0.354482	0.363704	0.322413	0.309469	0.369329	-0.0448861	0.0827039	0.0955368	-0.204344	-0.0354203	-0.058021	-0.196224	0.0835314	0.0910138	0.0578515	0.0986943	0.317729
ENSMUSG00000023832	Acat2	0.315684	0.29818	0.0386492	0.404767	0.237289	0.0893598	0.334796	0.213319	0.0347247	0.689456	0.241892	0.0712119	0.433082	0.368894	0.135057	0.154168	0.0182584	-0.23008	-0.291724	-0.0217234	0.124347	-0.260426	0.039826	-0.0113669	-0.0917368	0.0879333
ENSMUSG00000023852	Chd1	0.255052	0.250611	0.208001	0.115368	0.0771393	0.007822	0.278698	0.423212	0.144492	0.285121	0.106672	0.374139	0.366261	0.358771	0.34143	-0.47531	-0.196467	-0.410646	-0.0845757	-0.248314	-0.36441	-0.370389	-0.227731	-0.210627	-0.255267	0.235414
ENSMUSG00000023861	Mpc1	-0.0880289	-0.136562	-0.159397	-0.311336	-0.596039	0.357771	0.431891	0.56093	-0.462118	0.192996	-0.0646336	0.407824	0.0392761	0.284613	0.617641	-0.432106	-0.678121	-0.166395	-0.0479114	0.48172	0.482614	-0.0651126	0.452536	0.0476252	-0.025868	-0.247657
ENSMUSG00000023883	Phf10	-0.403097	-0.372245	0.0772914	-0.204807	-0.168927	-0.13992	-0.0217538	-0.198255	0.00708487	-0.12119	0.401677	0.158413	-0.00568462	-0.244951	-0.19309	-0.265614	0.0704699	-0.0341415	0.320777	0.368286	-0.0297639	0.444262	0.0887303	-0.220506	-0.150591	0.139088
ENSMUSG00000023908	Pkmyt1	-0.168479	-0.119047	-0.0338598	-0.0776309	-0.144625	0.15572	-0.148106	-0.101844	-0.028214	-0.0441312	0.0225545	-0.067272	0.112867	-0.13804	-0.183015	0.183986	-0.0241792	0.333155	0.18571	0.380052	0.236331	0.439225	0.309807	0.382228	0.275431	-0.0845116
ENSMUSG00000023909	Paqr4	0.352156	0.270358	0.11855	0.248374	0.332158	0.0684849	0.242035	0.144831	0.107347	0.530591	0.334019	0.131531	0.544069	0.256593	0.164864	0.081046	0.191586	-0.138514	-0.167105	-0.129942	0.0659228	-0.139412	-0.00987118	0.103634	-0.236787	0.148648
ENSMUSG00000023921	Mut	0.560438	0.174531	0.427363	-0.0326315	0.125675	0.317633	0.512374	0.612159	0.14448	-0.0401358	-0.0756741	0.357391	0.108212	0.164522	0.54807	-0.582914	-0.349569	0.0202254	-0.0286292	-0.227581	-0.0857937	-0.454657	-0.355953	-0.237933	-0.236589	0.14823
ENSMUSG00000023923	Tbc1d5	0.0653659	0.195166	0.210952	0.277083	0.2555	0.122174	-0.252007	-0.0967862	0.164772	0.0109534	-0.00612779	-0.076925	0.206047	0.0397732	-0.324115	-0.0358164	-0.0183111	-0.22439	-0.350446	-0.466683	-0.574659	-0.165262	-0.376025	0.0241713	-0.227716	0.0037578
ENSMUSG00000023939	Mrpl14	0.229303	0.784977	0.118844	0.503635	0.213953	-0.205328	0.0415952	-0.200201	0.415557	0.302599	0.294589	0.296626	0.116483	0.584468	0.270206	0.146406	0.0559686	-0.18539	-0.0885968	-0.218629	-0.478388	-0.0524968	0.273914	-0.310961	0.00610348	0.357698
ENSMUSG00000023942	Slc29a1	0.201512	-0.0225712	0.301937	0.15823	0.0211554	-0.00411815	0.464067	0.371093	0.200673	0.0687163	0.121931	0.266299	0.054867	0.115137	0.22906	-0.346039	-0.169077	0.113965	0.171993	0.185009	0.0756244	-0.0534726	-0.0569901	-0.158316	0.222073	0.302845
ENSMUSG00000023947	Nfkbie	-0.22562	-0.224372	0.397779	0.138769	0.167337	0.187622	0.220956	-0.00432181	0.263914	0.186128	0.656957	0.31228	0.235771	-0.0163974	-0.0170663	-0.334741	-0.144738	-0.0686189	0.0162832	0.304053	-0.00874447	0.539267	0.0425375	-0.159776	-0.270348	0.0139989
ENSMUSG00000023949	Tcte1	0.0835023	0.278333	0.333284	0.266901	0.0543823	0.469663	0.409529	0.112809	-0.0347421	0.021204	0.22237	0.287017	0.110224	0.30958	0.328096	-0.406122	-0.601694	-0.0962399	-0.251266	0.0195739	-0.227658	0.0713187	0.145561	-0.30216	-0.3988	-0.254586
ENSMUSG00000023951	Vegfa	-0.0541925	-0.247997	0.143592	-0.0593256	-0.251235	-0.263527	-0.0559052	-0.033764	0.0655183	-0.0995218	0.0897754	0.152054	-0.53121	-0.238151	-0.153145	-0.0212769	0.0798907	0.196597	0.204281	0.29357	0.159135	0.00796365	-0.0840994	-0.368055	0.110534	0.420341
ENSMUSG00000023961	Enpp4	0.113092	0.0573798	0.0557295	0.0386241	0.211261	-0.464327	-0.237457	-0.107458	0.421536	0.170204	0.251282	0.148521	0.0674253	-0.0693889	-0.132892	0.0875404	0.582452	-0.191133	0.289553	-0.284721	-0.124566	0.0735431	-0.135854	0.0308612	-0.0370941	0.554406
ENSMUSG00000023965	Fbxl17	0.243673	0.319691	0.109898	0.134366	-0.0906532	0.230303	0.301759	0.619269	0.084049	0.586166	0.149455	0.609681	0.362172	0.593395	0.514335	-0.425011	-0.386281	-0.581167	-0.329339	-0.141032	-0.178547	-0.378361	-0.0121156	-0.0103311	-0.283927	0.213065
ENSMUSG00000023967	Mrps18a	0.178617	0.0527401	0.00190108	0.0177956	0.147155	-0.0427384	0.265342	0.141349	0.114709	0.171349	0.186717	0.0927318	0.0836447	0.175128	0.300015	-0.0231215	0.0952793	-0.214526	-0.0133919	-0.18087	0.194604	-0.15372	-0.0505588	-0.331068	-0.197149	-0.0875268
ENSMUSG00000023971	Rrp36	-0.133501	0.217129	-0.463483	-0.175187	-0.237214	-0.130398	-0.012878	-0.0498943	0.150215	0.163447	0.041785	0.163476	0.0826842	0.371764	0.361093	0.144562	0.019706	-0.266215	0.215052	0.0734225	0.182195	0.27751	0.628351	0.206905	0.246098	-0.0267736
ENSMUSG00000023972	Ptk7	0.135782	0.345444	-0.0515515	0.247753	0.115387	0.0294225	0.149287	0.137954	-0.179428	0.627323	0.234922	0.193521	0.421831	0.371578	0.275042	0.0770411	0.0639897	-0.415898	-0.137566	-0.0961612	0.0321148	-0.159255	0.19194	0.0189408	-0.382658	-0.0448885
ENSMUSG00000023973	Cnpy3	0.366026	0.191953	0.632857	0.624595	0.464123	0.0242712	0.645172	0.180762	0.335506	0.285158	0.428063	0.199958	0.129601	0.205328	0.174419	-0.26019	-0.0943103	-0.0962269	-0.18462	-0.097995	-0.216334	-0.303444	-0.391554	-0.591711	-0.209933	0.219585
ENSMUSG00000023977	Ubr2	0.576813	0.652598	0.209557	0.180589	0.336474	0.261231	0.437476	0.271263	0.428106	0.0409553	0.0257473	0.287223	0.247758	0.536993	0.628849	-0.174448	-0.157077	-0.0337121	-0.0414697	-0.401502	-0.261157	-0.236042	-0.00354778	-0.192618	-0.132698	0.0433684
ENSMUSG00000023979	Guca1b	-0.498806	-0.256863	-0.0154943	0.358168	0.104542	-0.0102391	-0.00239779	-0.509112	-0.139387	-0.0779621	0.216286	-0.423298	-0.149826	-0.153129	-0.402793	0.260738	-0.0606396	0.0992995	-0.150667	0.271426	0.00695081	0.408766	0.10424	-0.246136	0.0119374	-0.49358
ENSMUSG00000023980	Taf8	0.392337	0.236015	0.0178058	-0.0920068	0.0978974	0.621668	0.435356	0.487734	0.0948053	0.0405401	-0.129205	0.170044	0.542888	0.352315	0.495134	-0.205862	-0.40595	0.145519	-0.137047	-0.0445137	0.169095	0.0168125	0.185971	0.524854	0.0647449	-0.259411
ENSMUSG00000023988	Bysl	0.358284	0.650492	-0.113824	0.254503	0.428823	-0.292698	0.013028	-0.0893198	0.495502	0.254422	0.132442	0.0861012	0.304545	0.439244	0.316041	0.249189	0.441569	-0.245522	0.221304	-0.531983	-0.195969	-0.00059685	0.19152	-0.0205194	0.0219944	0.204768
ENSMUSG00000023990	Tfeb	0.22759	0.0164855	0.506177	0.146747	0.251274	-0.111306	0.0589953	0.0441629	0.48721	0.204047	0.441668	0.329165	0.0997663	-0.0836774	-0.244045	-0.196613	0.249226	-0.0385591	0.0478726	-0.0152128	-0.245396	-0.0502069	-0.36669	-0.192087	-0.0653806	0.701615
ENSMUSG00000024007	Ppil1	0.262995	-0.039895	0.254738	-0.00188188	0.16697	0.457709	0.156252	-0.00939384	-0.304276	-0.451616	-0.45743	-0.395126	-0.23444	-0.419614	-0.135094	0.0688247	-0.114488	0.648511	0.29362	0.0385655	0.17055	0.057551	-0.162139	0.150718	-0.140438	-0.430341
ENSMUSG00000024008	Cpne5	-0.0104711	-0.164226	0.507271	0.284685	0.159811	0.392276	0.597151	0.25805	-0.0551444	0.107828	0.386494	0.234522	0.225539	0.0548318	0.204376	-0.512931	-0.469557	-0.0196962	-0.244246	0.244992	-0.0453959	0.0549453	-0.154814	-0.243085	-0.322613	-0.171166
ENSMUSG00000024019	Cmtr1	-0.0313242	-0.372963	0.102711	-0.518177	-0.238153	0.14862	0.187427	0.179262	-0.0635045	-0.440637	-0.161633	0.058309	-0.248568	-0.315153	0.163419	-0.342097	-0.222674	0.421611	0.381816	0.398657	0.281031	0.154467	-0.0204993	-0.0415825	0.141906	-0.0452447
ENSMUSG00000024026	Glo1	-0.0351714	-0.114264	0.465323	0.133495	0.232599	0.109676	0.465888	0.146135	0.202458	0.199187	0.687934	0.402272	0.409236	0.112633	0.237359	-0.540851	-0.198382	-0.160903	-0.121299	0.187685	-0.0722035	0.182453	-0.0534254	-0.311814	-0.272084	0.107761
ENSMUSG00000024044	Epb41l3	-0.0281107	-0.178642	0.395071	0.122039	-0.0622354	0.450533	0.448528	0.292965	0.24495	0.130464	0.369185	0.431995	0.0568638	0.0866835	0.0652408	-0.337296	-0.446594	0.136583	-0.10034	0.518437	0.161743	0.339542	0.117648	0.0885616	0.112485	0.157021
ENSMUSG00000024045	Akap8	0.6655	0.600062	0.133167	0.259124	0.490674	0.195135	0.257386	0.325948	0.13176	0.259134	-0.0157418	0.0964232	0.391488	0.324883	0.502491	0.0754569	0.145715	-0.0138056	0.0700656	-0.532885	0.050505	-0.245782	-0.0400609	-0.109757	-0.373934	-0.0978792
ENSMUSG00000024049	Myom1	0.012737	0.0172914	0.279584	0.111028	0.364685	0.274877	0.185176	-0.0401389	0.114644	-0.0948765	0.211952	-0.0615077	0.337663	-0.0584525	0.0997443	-0.247637	-0.0703014	0.10092	0.137453	-0.0952332	-0.14258	0.35353	-0.0439186	0.0158948	-0.295386	-0.302012
ENSMUSG00000024050	Wiz	0.0506234	-0.20911	0.279162	0.066906	-0.0575081	0.168487	0.214161	-0.00903856	-0.20516	-0.132169	-0.0394287	-0.0964016	-0.495306	-0.2299	-0.115913	-0.0162757	-0.104979	0.208558	-0.103979	0.171607	0.150908	-0.26658	-0.296978	-0.436609	-0.140861	-0.0790322
ENSMUSG00000024053	Emilin2	0.38066	-0.0345965	0.0231974	-0.253037	-0.189403	0.255764	0.355305	0.64534	-0.172441	0.312041	-0.262	0.180367	0.21722	0.0715004	0.318401	-0.207014	-0.185888	-0.079279	0.130394	0.124717	0.423648	-0.397796	-0.0452892	0.299322	0.0896039	0.0672442
ENSMUSG00000024054	Smchd1	-0.0404336	-0.0214469	0.103918	0.0980716	0.304436	0.259077	-0.368496	-0.325621	-0.0488237	-0.321942	-0.265663	-0.455677	-0.2048	-0.382698	-0.435103	0.246077	0.112404	0.324118	0.0346569	-0.238628	-0.205239	0.244207	-0.254529	0.150906	-0.25027	-0.369983
ENSMUSG00000024059	Clip4	0.363014	0.125908	0.576612	0.601726	0.752903	0.384633	0.288572	0.07289	0.335991	0.178393	0.286352	-0.0860109	0.306661	-0.0696089	-0.226937	0.00801845	0.0877396	0.125366	-0.147224	-0.303462	-0.16315	0.117445	-0.447103	-0.0644303	-0.406875	-0.0959727
ENSMUSG00000024063	Lbh	0.427734	0.502729	0.133894	0.550587	0.651338	0.0955211	0.240936	-0.222056	0.27832	0.0221857	0.0285068	-0.324084	0.167069	0.204365	0.00513496	0.370215	0.220891	0.256959	-0.127179	-0.392335	-0.159868	-0.0493821	-0.069723	-0.0964484	-0.00794918	-0.143175
ENSMUSG00000024065	Ehd3	-0.400429	-0.454688	-0.0979333	-0.271666	-0.511892	0.438181	0.337497	0.312831	-0.190045	-0.121689	0.0330301	0.213588	-0.0524563	0.143549	0.301942	-0.44556	-0.77814	-0.0827	-0.350386	0.492841	0.24833	0.148878	0.21763	0.0598923	0.140481	-0.397988
ENSMUSG00000024067	Dpy30	-0.165561	0.0935472	-0.273043	-0.151705	-0.311041	0.484721	0.245713	0.286605	-0.0704195	0.106916	0.0918777	0.390587	0.0876125	0.494003	0.509404	-0.126099	-0.522904	-0.107182	-0.224345	0.28916	0.262186	0.302321	0.574362	0.15029	-0.00966756	-0.338522
ENSMUSG00000024068	Spast	-0.259882	0.280496	-0.335144	-0.152914	-0.429083	0.113262	-0.073726	0.000542927	0.213192	0.0104936	0.0649884	0.417747	0.00772787	0.490655	0.292594	0.0180148	-0.361622	-0.0208892	0.014476	0.390725	-0.0718531	0.428999	0.705803	0.182892	0.375464	0.1056
ENSMUSG00000024069	Slc30a6	0.0335669	0.360827	0.306953	0.451482	0.316839	-0.0150974	0.223216	-0.0141315	0.623947	0.330676	0.572758	0.400572	0.531076	0.464685	0.0752405	0.0154619	0.019426	-0.143136	-0.141297	0.0799431	-0.299786	0.250275	0.175202	0.0546757	0.263766	0.315686
ENSMUSG00000024070	Prkd3	0.0064054	-0.0467237	-0.308026	-0.272375	-0.263139	0.0501118	0.0864505	0.252396	0.0705101	-0.0719777	-0.182598	0.161177	-0.0424906	0.147999	0.176619	0.0674877	-0.0339269	0.230819	0.214177	0.297599	0.300909	0.170096	0.305721	0.313697	0.424369	0.140639
ENSMUSG00000024079	Eif2ak2	0.185007	-0.0129853	-0.275387	-0.281223	-0.0977006	0.0762572	0.050113	0.476385	-0.0577057	0.236813	-0.224009	0.133696	0.202663	0.14063	0.300077	-0.0361247	0.0649166	-0.149602	0.165581	-0.0908607	0.29927	-0.118407	0.0359575	0.308515	-0.0311598	-0.00107457
ENSMUSG00000024081	Cebpz	-0.221464	-0.0866292	-0.192682	-0.0624958	-0.146879	0.171639	0.156988	0.1975	0.16568	-0.010547	0.149751	0.156293	0.448893	0.347634	0.343549	-0.217555	-0.416714	-0.268579	-0.330062	0.0116706	0.0321786	0.174376	0.264083	0.211262	0.240347	-0.311669
ENSMUSG00000024082	Ndufaf7	-0.169309	-0.375199	-0.406179	-0.200277	-0.315176	-0.172611	-0.221904	-0.0108044	-0.356383	0.0605308	-0.301488	-0.35577	-0.269718	-0.242407	-0.282476	0.425154	0.161537	0.189046	-0.0102742	0.289356	0.584842	-0.0890407	0.0988345	0.204466	0.435396	-0.0957205
ENSMUSG00000024084	Qpct	-0.222237	0.0347283	-0.656044	-0.306865	-0.252751	0.0734263	-0.390769	-0.168159	0.0524341	-0.266809	-0.360152	-0.214057	-0.113841	0.146201	-0.0104875	0.328136	-0.0339046	-0.0496649	-0.177882	-0.17369	0.0699789	0.192673	0.365454	0.456985	0.390563	-0.270304
[truncated: 5,032 more rows]
