# Supplementary material for: Transcription factor network analysis identifies REST/NRSF as an intrinsic regulator of CNS regeneration
Source: Research Square preprint supplement (doi:10.21203/rs.3.rs-102518/v1), 2020-11-16
Supplement: Supplementary file 7 [file f6d929e3a0165b33baab5837.xlsx]

## Sheet: RAG netowrk
Supplemental Table 2. Annotation of molecules in the regeneration-associated PPI network in Figure 4D
Symbol	Synonym(s)	Entrez Gene Name	Location	Family	Drugs	Entrez Gene ID for Human	Entrez Gene ID for Mouse	Entrez Gene ID for Rat
ACVR1	Activin A Receptor, activin A receptor type 1, activin A receptor, type 1, ACTR1, ACTRI, ActRIA, Acvr, ACVR1A, ACVRLK2, ALK2, Alk8, D330013D15Rik, FOP, SKR1, Tsk7L, TSRI	activin A receptor type 1	Plasma Membrane	kinase		90	11477	79558
ARHGEF7	beta1PIX, BETA-PIX, betaPix-b, betaPix-c, Beta-Pix Cool, Cool, COOL-1, mKIAA0142, Nbla10314, P50, P50BP, P85, P85 beta pix, P85COOL1, P85SPR, P85 Î² pix, PAK3, Pak3bp, PAK-INTERACTING EXCHANGE FACTOR beta, PAK-INTERACTING EXCHANGE FACTOR Î², PIX, PIXB, Rho guanine nucleotide exchange factor 7, Rho guanine nucleotide exchange factor (GEF7), Î²-PIX, Î² Pix-a, Î²-Pix Cool	Rho guanine nucleotide exchange factor 7	Cytoplasm	other		8874	54126	114559
ATF2	activating transcription factor 2, CREB-2, CRE-BP, CRE-BP1, D130078H02Rik, D18875, HB16, LOC100047997, mXBP, Tg(Gzma-Klra1)7Wum, TREB7	activating transcription factor 2	Nucleus	transcription regulator		1386	11909	81647
ATF3	activating transcription factor 3, AIT3, LRF-1, LRFI, LRG-21	activating transcription factor 3	Nucleus	transcription regulator		467	11910	25389
ATF5	activating transcription factor 5, AFTA, Atf7, ATFX, HMFN0395, ODA-10	activating transcription factor 5	Nucleus	transcription regulator		22809	107503	282840
CDKN1A	CAP20, CDKI, CDKN1, CDKNA1, CIP1, cyclin-dependent kinase inhibitor 1A, cyclin-dependent kinase inhibitor 1A (P21), MDA-6, P21, p21Cip, p21CIP1, p21WAF, p21Waf1, Pzl Cyclin-Dependent Kinase Inhibitor, SDI1, UV96, WAF1	cyclin dependent kinase inhibitor 1A	Nucleus	kinase		1026	12575	114851
CISH	BACTS2, CIS, CIS-1, cytokine inducible SH2-containing protein, F17, F23, G18, SOCS	cytokine inducible SH2 containing protein	Cytoplasm	other		1154	12700	83681
CNR1	CANN6, Cannabinoid cb1 receptor, Cannabinoid Receptor, cannabinoid receptor 1, cannabinoid receptor 1 (brain), CB1, CB1A, CB1B, CB1K5, CB1R, CB1 receptors, CB-R, CNR, CNR1 isoform 1, Gm3576, LOC100046242, SKR6R	cannabinoid receptor 1	Plasma Membrane	G-protein coupled receptor	delta-8-tetrahydrocannabinol, BAY 38-7271, SLV 319, delta-9-tetrahydrocannabinol, trans-(Â±)-nabilone, rimonabant	1268	12801	25248
CREM	cAMP responsive element modulator, CREM1, CREM-2, Crem Î±, Crem Î², Crem Î³, Crem Îµ, hCREM-2, ICER, Icer-1	cAMP responsive element modulator	Nucleus	transcription regulator		1390	12916	25620
CXCL12	chemokine (C-X-C motif) ligand 12, CXCL12 isoform 1, C-X-C motif chemokine ligand 12, hIRH, IRH, LOC105378278, PBSF, SCYB12, SDF, SDF1, SDF-1alpha, SDF-1Î±, Stromal cell derived factor 1, TLSF, TPAR1	C-X-C motif chemokine ligand 12	Extracellular Space	cytokine	NOX-A12	6387	20315	24772
EGR1	A530045N19Rik, AT225, Early Growth Response 1, egr, ETR103, G0S30, Krox-1, KROX-24, Ngf1, NGF1-A, Ngfi, NGFI-A, TIS8, V5, Zenk, Zfp-6, ZIF-268, ZIF/268, ZNF225	early growth response 1	Nucleus	transcription regulator		1958	13653	24330
EIF4EBP1	4EBP, 4E-BP1, AA959816, BP-1, Eukaryotic translation initiation factor 4e binding protein 1, PHAS-I	eukaryotic translation initiation factor 4E binding protein 1	Cytoplasm	translation regulator		1978	13685	116636
FOS	AP-1, C-FOS, D12Rfj1, FBJ osteosarcoma oncogene, Fos proto-oncogene, AP-1 transcription factor subunit, p55	Fos proto-oncogene, AP-1 transcription factor subunit	Nucleus	transcription regulator		2353	14281	314322
GABBR1	bM573K1.1, GABA B1, GABA B1 A, GABABR1, GABBR1-3, gamma-aminobutyric acid (GABA) B receptor, 1, gamma-aminobutyric acid type B receptor subunit 1, GB1, GPRC3A, Î³-aminobutyric acid (GABA) B receptor, 1, Î³-aminobutyric acid type B receptor subunit 1	gamma-aminobutyric acid type B receptor subunit 1	Plasma Membrane	G-protein coupled receptor	vigabatrin, baclofen, arbaclofen, arbaclofen placarbil	2550	54393	81657
GABBR2	EIEE59, Gaba B2, GABABR2, GABA(B)R2, gamma-aminobutyric acid (GABA) B receptor, 2, gamma-aminobutyric acid type B receptor subunit 2, Gb2, Gm425, GPR51, GPRC3B, HG20, HRIHFB2099, NDPLHS, Î³-aminobutyric acid (GABA) B receptor, 2, Î³-aminobutyric acid type B receptor subunit 2	gamma-aminobutyric acid type B receptor subunit 2	Plasma Membrane	G-protein coupled receptor	baclofen, arbaclofen, arbaclofen placarbil	9568	242425	83633
GADD45A	AA545191, DDIT1, Gadd, GADD45, growth arrest and DNA-damage-inducible 45 alpha, growth arrest and DNA-damage-inducible 45 Î±, Growth arrest and DNA-damage-inducible 45, Î±, growth arrest and DNA damage inducible alpha, growth arrest and DNA-damage-inducible, alpha, growth arrest and DNA damage inducible Î±, growth arrest and DNA-damage-inducible, Î±	growth arrest and DNA damage inducible alpha	Nucleus	other		1647	13197	25112
GNAO1	alphaO, AW050213, EIEE17, G-ALPHA-o, GAO2, GNAO, GNAO2, Go, Go2 Î±, Go alpha subunit 2, Go Î±, Go Î± subunit 2, G protein alpha O subunit, G protein ao, G protein O, G protein subunit alpha o1, G protein subunit Î± o1, G-protein Î± o, G protein Î± o1, G protein Î± O subunit, guanine nucleotide binding protein, alpha O, guanine nucleotide binding protein, Î± O, G zero, G-Î±-o, HLA-DQB1, NEDIM, RAT…	G protein subunit alpha o1	Plasma Membrane	enzyme		2775	14681	50664
HSPB1	ACTIN POLYMERIZATION INHIBITOR, CMT2F, heat shock protein 1, Heat shock protein 1 beta, Heat shock protein 1 Î², heat shock protein family B (small) member 1, HEL-S-102, HMN2B, HS.76067, Hsb1, Hsp25, HSP27, HSP28, SRP27	heat shock protein family B (small) member 1	Cytoplasm	other		3315	15507	24471
IL4R	CD124, IL-4RA, IL4R alpha, Il4r beta, IL-4 receptor, il 4 receptor Î± chain, IL-4R-Î±, Il4r Î², interleukin 4 receptor, interleukin 4 receptor, alpha, interleukin 4 receptor, Î±, MFF receptor	interleukin 4 receptor	Plasma Membrane	transmembrane receptor	dupilumab, MDNA55	3566	16190	25084
IL6	BSF-2, CDF, FDGI, HGF, HSF, IFNB2, IFN-beta-2, IFN beta 2A, IFN-Î²-2, IFN Î² 2A, ILg6, interleukin-6	interleukin 6	Extracellular Space	cytokine	clazakizumab, ziltivekimab, interleukin-6 receptor inhibitor, siltuximab, tocilizumab	3569	16193	24498
INHBB	activin AB beta polypeptide precursor, activin AB Î² polypeptide precursor, Activin B, activin beta B, Activin Î² B, Beta-B, Inhibin B, inhibin beta-B, inhibin subunit beta B, inhibin subunit Î² B, inhibin Î²-B, Inhibin Î² b subunit, Î²-B	inhibin subunit beta B	Extracellular Space	growth factor		3625	16324	25196
ITGAV	1110004F14RIK, 2610028E01Rik, alpha V, CD51, D430040G12RIK, integrin alpha V, integrin subunit alpha V, integrin subunit Î± V, Integrin Î± V, MSK8, VNRA, VTNR, Î± V	integrin subunit alpha V	Plasma Membrane	transmembrane receptor	cilengitide, fluciclatide F 18, abciximab, 68Ga-NOTA-BBN-RGD, abituzumab, intetumumab, etaracizumab	3685	16410	296456
ITGB1	4633401G24RIK, AA409975, AA960159, beta1-Integrin, CD29, CD29 antigen, FNRB, Gm9863, GPIIA, integrin beta 1 (fibronectin receptor beta), integrin subunit beta 1, integrin subunit Î² 1, Integrin Î² 1, integrin Î² 1 (fibronectin receptor Î²), Integrin Î² 1 receptor, MDF2, MSK12, VLAB, VLA-BETA, VLA-Î², Î²1-Integrin, Î²(1)-integrins	integrin subunit beta 1	Plasma Membrane	transmembrane receptor		3688	16412	24511
ITGB5	AA475909, AI874634, [b]-5, [b]5A, [b]5B, beta-5, Beta5 integrin, ESTM23, integrin beta 5, Integrin Beta X, integrin subunit beta 5, integrin subunit Î² 5, Integrin Î² 5, Integrin Î² X, RGD1563276, Î²-5	integrin subunit beta 5	Plasma Membrane	other	cilengitide	3693	16419	257645
ITGB8	4832412O06RIK, Integrin beta8, integrin subunit beta 8, integrin subunit Î² 8, integrin Î² 8	integrin subunit beta 8	Plasma Membrane	other		3696	320910	362800
JAK2	AI504024, C81284, Fd17, Janus kinase 2, JTK10, THCYT3	Janus kinase 2	Cytoplasm	kinase	NS-018, erlotinib/ruxolitinib, baricitinib, ruxolitinib, jak2 inhibitor, tofacitinib, SB-1317, jaktinib, momelotinib, XL019, upadacitinib, WP1066, methotrexate/tofacitinib, BMS-911543, AZD1480, baricitinib/methotrexate, pacritinib, entrectinib, gandotinib, fedratinib	3717	16452	24514
JUN	Activator protein 1, AP-1, API-1, c-Fos, c-Jun, Junc, jun proto-oncogene, Jun proto-oncogene, AP-1 transcription factor subunit, LOC100288387, LOC100291417, LOC100293034, p39, v-Jun, V-jun Avian Sarcoma Virus 17 Oncogene Homolog, V-jun Sarcoma Virus 17 Oncogene Homolog	Jun proto-oncogene, AP-1 transcription factor subunit	Nucleus	transcription regulator		3725	16476	24516
LINGO1	4930471K13RIK, AV148400, FLJ14594, LERN1, leucine rich repeat and Ig domain containing 1, LRRN6A, MRT64, UNQ201	leucine rich repeat and Ig domain containing 1	Plasma Membrane	other		84894	235402	315691
MAPK14	CRK1, CSBP, CSBP1, CSBP2, CSPB1, EXIP, Hog, LOC101929346, MAPK p38, mitogen-activated protein kinase 14, Mxi2, p38, p38a, p38ALPHA, p38Hog, p38 kinase, p38 MAPK, P38 Map Kinase, p38 MAP kinases alpha and beta, p38 MAP kinases Î± and Î², p38 MAPK-Î±, p38-Î±, PRKM14, PRKM15, RK, SAPK2A, SAPK p38 alpha, SAPK p38 Î±	mitogen-activated protein kinase 14	Cytoplasm	kinase	RO-3201195, p38 MAP kinase inhibitor, talmapimod, ralimetinib	1432	26416	81649
MAPKAPK2	AA960234, MAPK activated protein kinase 2, Mapkap2, MAPKAP Kinase 2, MAP kinase-activated protein kinase 2, MK-2, Rps6kc1	MAPK activated protein kinase 2	Nucleus	kinase	cdc25C phosphatase (211-221)	9261	17164	289014
MET	AI838057, AUTS9, c-Met, DFNB97, HGF, HGF Binding, HGFR, LOC360378, met proto-oncogene, MET proto-oncogene, receptor tyrosine kinase, MetR, PAR4, RCCP2	MET proto-oncogene, receptor tyrosine kinase	Plasma Membrane	kinase	EMD 1204831, bozitinib, TR1801, ARGX-111, glumetinib, OMO-1, MK2461, ABN401, crizotinib, ABT-700, LY2875358, SAR125844, crizotinib/vemurafenib, merestinib, glesatinib, cabozantinib, crizotinib/erlotinib, antibody-drug conjugate ABBV-399, SHR-A1403, GST-HG161, volitinib, TQ-B3139, onartuzumab, LY3164530, AL2846, EMI-137, cabozantinib/erlotinib, tivantinib, AMG 208, JNJ-38877605, amuvatinib, EMB-01…	4233	17295	24553
MMP3	CHDS6, EMS-2, matrix metallopeptidase 3, MT3-MMP, SL-1, SLN-1, STMY, STMY1, STR-1, STROMELYSIN, Stromelysin-1, Transin-1 Metalloprotease	matrix metallopeptidase 3	Extracellular Space	peptidase	marimastat	4314	17392	171045
MYC	AU016757, bHLHe39, CMYC, C-MYC-P64, mMyc, MRTL, Myc2, MYCC, MYC proto-oncogene, bHLH transcription factor, myelocytomatosis oncogene, Niard, Nird, RNCMYC	MYC proto-oncogene, bHLH transcription factor	Nucleus	transcription regulator	AVI-4126, MYC-targeting siRNA DCR-MYC	4609	17869	24577
NCK2	4833426I10RIK, GRB4, LOC100503894, NCK adaptor protein 2, NCKbeta, Nck Î², non-catalytic region of tyrosine kinase adaptor protein 2	NCK adaptor protein 2	Cytoplasm	kinase		8440	17974	316369
NEDD9	CAS2, CAS-L, CASS2, enhancer of filamentation 1, HEF1, MEF1, neural precursor cell expressed, developmentally down-regulated 9, neural precursor cell expressed, developmentally down-regulated gene 9, p105, P105hef1	neural precursor cell expressed, developmentally down-regulated 9	Nucleus	other		4739	18003	291044
NFATC1	2210017P03Rik, AI449492, AV076380, NFAT2, NF-ATC, NF-ATc1.2, Nfatcb, nuclear factor of activated T-cells 1, nuclear factor of activated T cells, cytoplasmic, calcineurin dependent 1	nuclear factor of activated T cells 1	Nucleus	transcription regulator		4772	18018	100361818
NFATC2	AI607462, NFAT1, NFAT1-D, NF-ATp, nuclear factor of activated T-cells 2, nuclear factor of activated T cells, cytoplasmic, calcineurin dependent 2	nuclear factor of activated T cells 2	Nucleus	transcription regulator		4773	18019	311658
NFKB1	CVID12, EBP-1, KBF1, NF-kappa-B, NF-kappa-B1, NFkappaB1 p105, Nf kappa b DNA binding subunit, NFkappaB-p50, NF KAPPA B subunit P50, NF-kB, NFKB-p105, NFKB subunit P105/P50, NF-Îº-B, NF-Îº-B1, NFÎºB1 p105, Nf Îº b DNA binding subunit, NFÎºB-p50, NF Îº B subunit P50, NUCLEAR FACTOR KAPPA B DNA binding subunit, nuclear factor kappa B subunit 1, nuclear factor of kappa light polypeptide gene enhancer…	nuclear factor kappa B subunit 1	Nucleus	transcription regulator	triflusal, dexamethasone/thalidomide, bortezomib/dexamethasone/thalidomide, thalidomide, rituximab/thalidomide, prednisone/thalidomide, bortezomib/thalidomide	4790	18033	81736
NTRK1	C80751, MTC, neurotrophic receptor tyrosine kinase 1, neurotrophic tyrosine kinase, receptor, type 1, p140 Trk, p140-TrkA, Tkr, TRK, TRK1, TRKA, TRKA longest isoform, TRKA NGFR	neurotrophic receptor tyrosine kinase 1	Plasma Membrane	kinase	larotrectinib, VMD-928, NOV1601, DS-6051b, belizatinib, lorlatinib, entrectinib, TRK tyrosine kinase inhibitor, PLX7486, repotrectinib, milciclib, regorafenib, LOXO-195	4914	18211	59109
PIK3CA	6330412C24RIK, caPI3K, CLAPO, CLOVE, CWS5, MCAP, MCM, MCMTC, p110, p110-alpha, P110 Î±, phosphatidylinositol-4,5-bisphosphate 3-kinase catalytic subunit alpha, phosphatidylinositol-4,5-bisphosphate 3-kinase, catalytic subunit alpha, phosphatidylinositol-4,5-bisphosphate 3-kinase catalytic subunit Î±, phosphatidylinositol-4,5-bisphosphate 3-kinase, catalytic subunit Î±, PI3K, PI3K-alpha, PI3K alph…	phosphatidylinositol-4,5-bisphosphate 3-kinase catalytic subunit alpha	Cytoplasm	kinase	alpelisib/fulvestrant, PWT33597, AZD8835, taselisib, bimiralisib, copanlisib, alpelisib, dactolisib, PKI-179, serabelisib, BAY1082439, pilaralisib, PX-866, SF 1126, pictilisib, CLR457, buparlisib, alpelisib/trastuzumab emtansine, GDC-0077	5290	18706	170911
PLAT	alteplase, alteplase, recombinant, AU020998, AW212668, D8Ertd2e, PATISS, plasminogen activator, tissue, plasminogen activator, tissue type, recombinant tissue plasminogen activator, TAPI-1, tisokinase, tissue activator D 44, tissue plasminogen activator, tissue-type plasminogen activator, T-PA, T-plasminogen activator	plasminogen activator, tissue type	Extracellular Space	peptidase	6-aminocaproic acid	5327	18791	25692
PPP1R12A	1200015F06Rik, 5730577I22Rik, AA792106, AV099298, D10Ertd625e, M110, M130, MBS, MBS130, MBSP, Mypt, MYPT1, protein phosphatase 1 regulatory subunit 12A, protein phosphatase 1, regulatory subunit 12A	protein phosphatase 1 regulatory subunit 12A	Cytoplasm	phosphatase		4659	17931
PTPN1	protein-TYROSINE PHOSPHATASE, protein tyrosine phosphatase non-receptor type 1, protein tyrosine phosphatase, non-receptor type 1, Ptp, PTP-1B, PTP1B alpha, PTP1BB, PTP1B Î±, Ptpase 1, PTPASE 1B, PTP-HA2	protein tyrosine phosphatase non-receptor type 1	Cytoplasm	phosphatase	protein tyrosine phosphatase 1B inhibitor, trodusquemine	5770	19246	24697
PTPN2	AI325124, protein tyrosine phosphatase non-receptor type 2, protein tyrosine phosphatase, non-receptor type 2, PTN2, PTPase, Ptps, PTPT, Tc45, TCELLPTP, T CELL PTPASE, TC-PTP	protein tyrosine phosphatase non-receptor type 2	Cytoplasm	phosphatase		5771	19255	117063
RAPGEF1	4932418O06Rik, C3G, C3G-1, C3G-2, GRF2, Rap guanine nucleotide exchange factor 1, Rap guanine nucleotide exchange factor (GEF) 1	Rap guanine nucleotide exchange factor 1	Cytoplasm	other		2889	107746	63881
RELA	CMCU, NF-kappa B, NF-kappa B (p65), NF KAPPA B subunit P65, NFkB, NFKB3, NFkB/p65, NF-Îº B, NF-Îº B (p65), NF-ÎºB p65, NF Îº B subunit P65, nos2, p65, p65 NF-kappa B, p65 NFkB, p65 NF-Îº B, p65/Rela, RELA proto-oncogene, NF-kB subunit, v-rel reticuloendotheliosis viral oncogene homolog A (avian)	RELA proto-oncogene, NF-kB subunit	Nucleus	transcription regulator	NF-kappaB decoy	5970	19697	309165
RHOB	AA017882, ARH6, ARHB, MST081, MSTP081, ras homolog family member B, Ras homolog gene family, member ab, RAS HOMOLOG GENE family, member B, ras-related homolog B, RHOH6, SEQUENCE 12 FROM PATENT WO9954460	ras homolog family member B	Cytoplasm	enzyme		388	11852	64373
RHOC	AI324259, ARH9, ARHC, H9, ras homolog family member C, RAS HOMOLOG GENE family, member C, Rhoc1, Rhoc predicted, RHOH9	ras homolog family member C	Plasma Membrane	enzyme		389	11853	295342
RHOQ	ARHQ, HEL-S-42, ras homolog family member Q, RASL7A, Rhot, TC10, TC10A, Tc10alpha, TC10 beta, Tc10 Î±, TC10 Î²	ras homolog family member Q	Plasma Membrane	enzyme		23433	104215	85428
RRAS2	2610016H24Rik, C86394, NS12, RAS related 2, related RAS viral (r-ras) oncogene 2, TC21	RAS related 2	Plasma Membrane	enzyme		22800	66922	365355
RTN4R	NGR, NGR1, NOGO66, NOGOR, reticulon 4 receptor	reticulon 4 receptor	Plasma Membrane	transmembrane receptor		65078	65079	113912
RUNX2	AML3, Cbf, CBFA1, CBF-alpha 1, CBF-Î± 1, CCD, CCD1, CLCD, LS3, OSF-2, PEA2aA, PEA2-alpha A, PEA2-Î± A, PEBP2A, PEBP2aA, Pebp2 Î± A, runt related transcription factor 2, RUNX2C, RUNX2 MRIPV, RUNX family transcription factor 2	RUNX family transcription factor 2	Nucleus	transcription regulator		860	12393	367218
SFN	14-3-3, 14-3-3 Sigma, 14-3-3 Ïƒ, ER, HME1, Mme1, Stratifin, YWHAS	stratifin	Cytoplasm	other		2810	55948	313017
SMAD1	AI528653, BSP-1, DKFZP586M0622, dwf-A, JV4-1, Mad1, MADH1, MADR1, Mlp1, mMad1, MusMLP, SMAD family member 1	SMAD family member 1	Nucleus	transcription regulator		4086	17125	25671
SMURF1	4930431E10RIK, mKIAA1625, RGD1309707, SMAD specific E3 ubiquitin protein ligase 1	SMAD specific E3 ubiquitin protein ligase 1	Cytoplasm	enzyme		57154	75788	690516
SOCS3	ATOD4, CIS3, CISH3, EF-10, Soc3, Sosc3, SSI-3, Suppressor of cytokine signaling 3	suppressor of cytokine signaling 3	Cytoplasm	phosphatase		9021	12702	89829
SP1	1110003E12RIK, AA450830, AI845540, Sp1-1, Sp1 transcription factor, Sp1 (trans spliced isoform), Trans-acting transcription factor 1	Sp1 transcription factor	Nucleus	transcription regulator		6667	20683	24790
SRF	AW049942, AW240594, MCM1, PRTF, RGD1559787, serum response factor, Sfr	serum response factor	Nucleus	transcription regulator		6722	20807	501099
STAT1	2010005J02Rik, AA408197, CANDF7, DD6G4-4, IMD31A, IMD31B, IMD31C, ISGF-3, p91, signal transducer and activator of transcription 1, STAT1 alpha, Stat1 beta, Stat1 p91, STAT1 Î±, Stat1 Î², STAT91, TRANSCRIPTION FACTOR SIGNAL TRANSDUCER and ACTIVATOR	signal transducer and activator of transcription 1	Nucleus	transcription regulator		6772	20846	25124
STAT3	1110034C02Rik, acute-phase response factor, ADMIO, ADMIO1, APRF, AW109958, HIES, MGC16063, signal transducer and activator of transcription 3, Stat3 alpha isoform, Stat3 beta isoform, Stat3 delta, Stat3 Î± isoform, Stat3 Î² isoform, Stat3 Î´	signal transducer and activator of transcription 3	Nucleus	transcription regulator	danvatirsen, OPB-31121, OPB-51602, TTI-101, golotimod, STAT3 inhibitor	6774	20848	25125
STAT4	signal transducer and activator of transcription 4, SLEB11, STAT4 alpha, STAT4 Î±	signal transducer and activator of transcription 4	Nucleus	transcription regulator		6775	20849	367264
STAT5A	AA959963, MGF, pp95, signal transducer and activator of transcription 5A, STAT5, STAT5 alpha, STAT5A/MGF, STAT5 Î±, STATA5	signal transducer and activator of transcription 5A	Nucleus	transcription regulator		6776	20850	24918
STAT5B	LOC107984978, signal transducer and activator of transcription 5B, STAT5	signal transducer and activator of transcription 5B	Nucleus	transcription regulator		6777	20851	25126
TCF3	A1, AA408400, AGM8, ALF2, AW209082, bHLHb21, E12/E47, E2-5, E2A, E47, ITF1, KA1, LOC100364490, LOC688265, ME2, p75, Pan1, Pan2, TCF3 isoform 1, Tcfe2a, TRANSCRIPTION FACTOR 3, VDIR	transcription factor 3	Nucleus	transcription regulator		6929	21423	171046
TGFBR1	AAT5, ACVRLK4, ALK-5, AU017191, ESK2, ESS1, LDS1, LDS1A, LDS2A, LOC666236, MSSE, SKR4, TbetaR-I, TBR-I, TGFbeta1R1, TGF beta I receptor, Tgf-beta-r1, TGF beta receptor type I, TGFbetaRI, Tgfb receptor I, TGFR-1, TGFÎ²1R1, TGF Î² I receptor, TGFÎ² R1, Tgf -Î² R1/R4, Tgf-Î² receptor1, TGF Î² receptor type I, TGFÎ²RI, TGF Î² type 1 receptors, Tgf Î² type i receptor, transforming growth factor beta r…	transforming growth factor beta receptor 1	Plasma Membrane	kinase	vactosertib, YL-13027, galunisertib	7046	21812	29591
TLN1	ILWEQ, TALIN, talin-1, TLN	talin 1	Plasma Membrane	other		7094	21894	313494
TNFRSF1A	CD120a, FPF, p55, p55-R, p55 TNF alpha receptor, p55 TNF Î± receptor, p60, TBP1, TNF-alphaR1, Tnf alpha receptor p60, TNFAR, TNF-R, TNF-R1, Tnfr-2, TNF-R55, TNFR60, TNF receptor 1, TNF receptor superfamily member 1A, TNF-R-I, TNFRp55, Tnf-Î± Receptor 2, Tnf Î± receptor p60, Tnf Î± Receptor Type1, Tnf-Î± receptor type I, tumor necrosis factor receptor superfamily, member 1a, tumour necrosis factor…	TNF receptor superfamily member 1A	Plasma Membrane	transmembrane receptor	GSK2862277	7132	21937	25625
TNK2	ACK, ACK-1, Cdgip, LOC682784, p21cdc42Hs, Pyk1, tyrosine kinase non receptor 2, tyrosine kinase, non-receptor, 2	tyrosine kinase non receptor 2	Cytoplasm	kinase	cetuximab/vemurafenib, irinotecan/panitumumab/vemurafenib, pembrolizumab/vemurafenib, vemurafenib, dabrafenib/trametinib/vemurafenib, trametinib/vemurafenib, crizotinib/vemurafenib, ipilimumab/vemurafenib, erlotinib/osimertinib, cobimetinib/vemurafenib, afatinib/osimertinib, lorlatinib, entrectinib, osimertinib, gefitinib/osimertinib, cetuximab/irinotecan/vemurafenib	10188	51789	303882
TP53	bbl, BCC7, bfy, bhy, BMFS5, LFS1, p44, P53, P53 cellular tumour antigen, p53 tumor suppressor, transformation related protein 53, TRP53, tumor protein p53, tumour protein p53	tumor protein p53	Nucleus	transcription regulator	BI 907828, cenersen, kevetrin, azurin 50-77, APR-246, ALT-801, COTI-2, CGM097	7157	22059	24842
VAV2	2810040F13Rik, AI847175, PP3781, vav 2 oncogene, vav guanine nucleotide exchange factor 2	vav guanine nucleotide exchange factor 2	Cytoplasm	transcription regulator		7410	22325	296603
