# Supplementary material for: Transcription factor network analysis identifies REST/NRSF as an intrinsic regulator of CNS regeneration
Source: Research Square preprint supplement (doi:10.21203/rs.3.rs-102518/v1), 2020-11-16
Supplement: Supplementary file [file 463982c93474d384f0daed0e.pdf]

# Figure S1

**A**

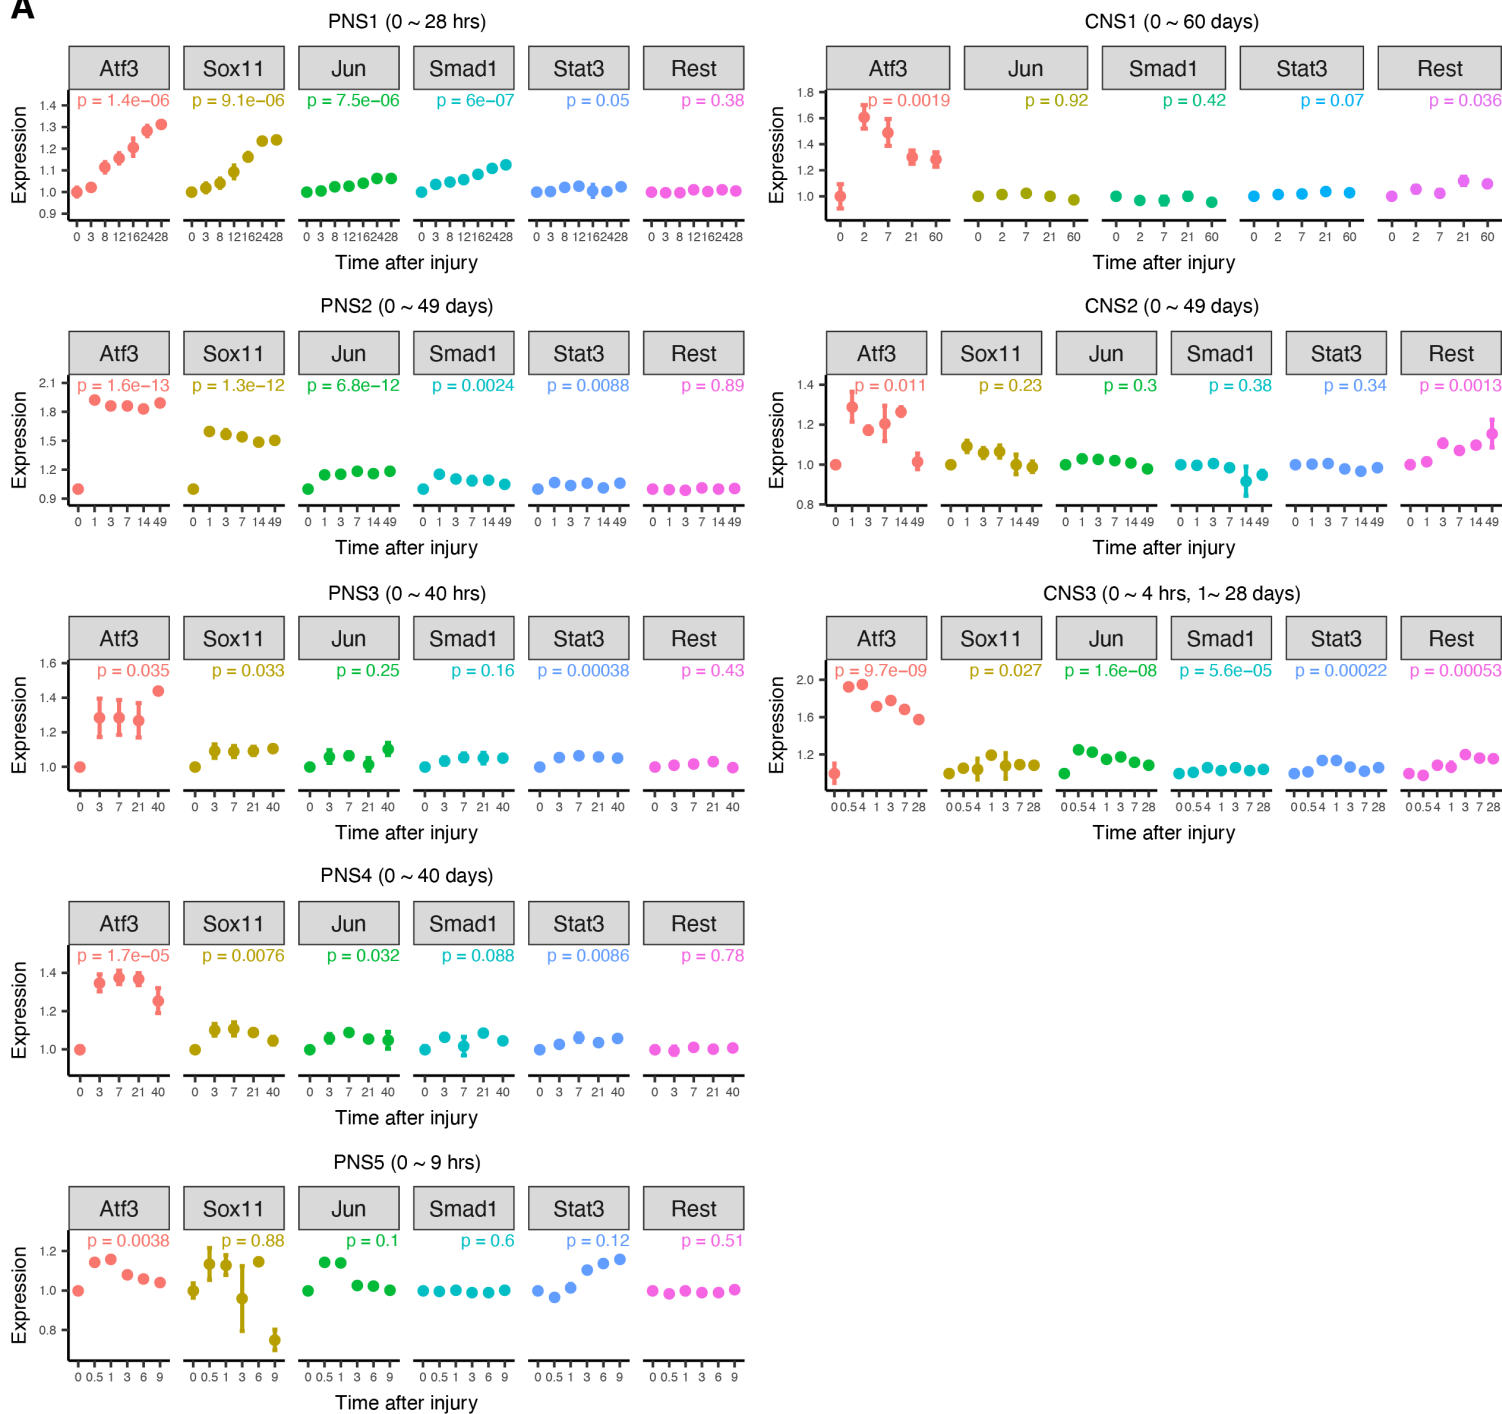

**B**

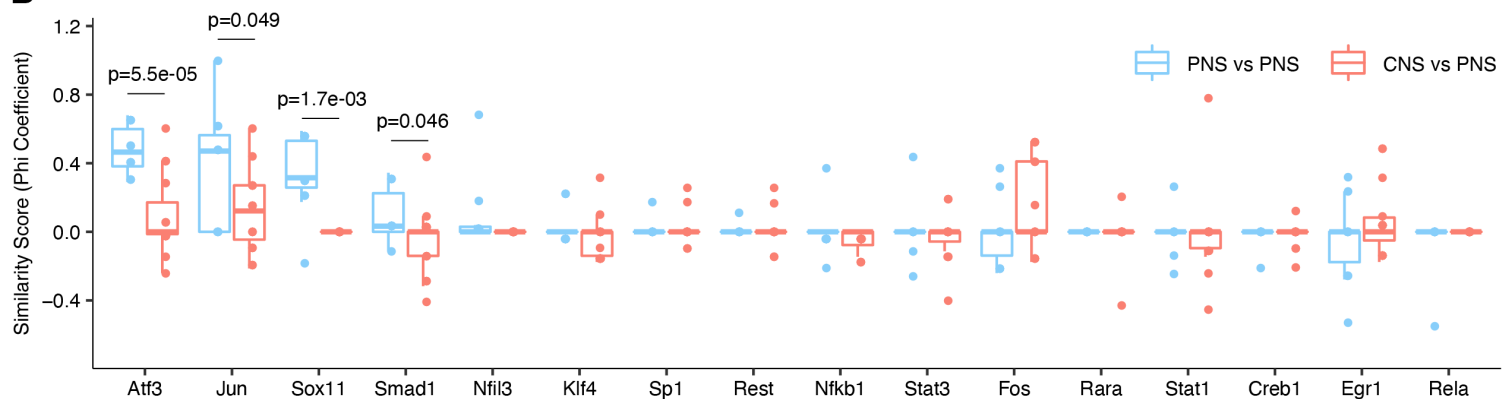

**Figure S1. TF networks comparing PNS and CNS, related to Figure 2. (A)** Relative expression levels of key regenerative TFs (*Atf3*, *Sox11*, *Jun*, *Smad1*, *Stat3*, *Rest*) across multiple PNS and CNS injury datasets listed in Figure 2B. Each dot represents the mean log fold changes normalized to control sham condition. N = 3 in each time point and error bars indicates SEM. p-values are from ANOVA comparing injured with sham control samples, adjusted with TukeyHSD. **(B)** Similarity of ARACNe-identified TF networks across multiple PNS and CNS injury datasets listed in Figure 2B. Phi coefficient was used to calculate the correlation of each TF's networks between two datasets since a TF's connections with the other TFs are binary (1 means a connection exists between two TFs and 0 means no connection). Each dot represents the Phi coefficient of a TF network between two datasets. Blue dots indicate similarity of TF networks comparing PNS vs PNS, and red dots represent similarity comparing CNS vs PNS. Statistical differences were calculated by Welch two sample t-test on Fisher-transformed z values from Phi coefficient, as coefficient correlations are not normally distributed. Comparisons with no statistical difference ( $p > 0.05$ ) were not labeled with its p-values.

Figure S2

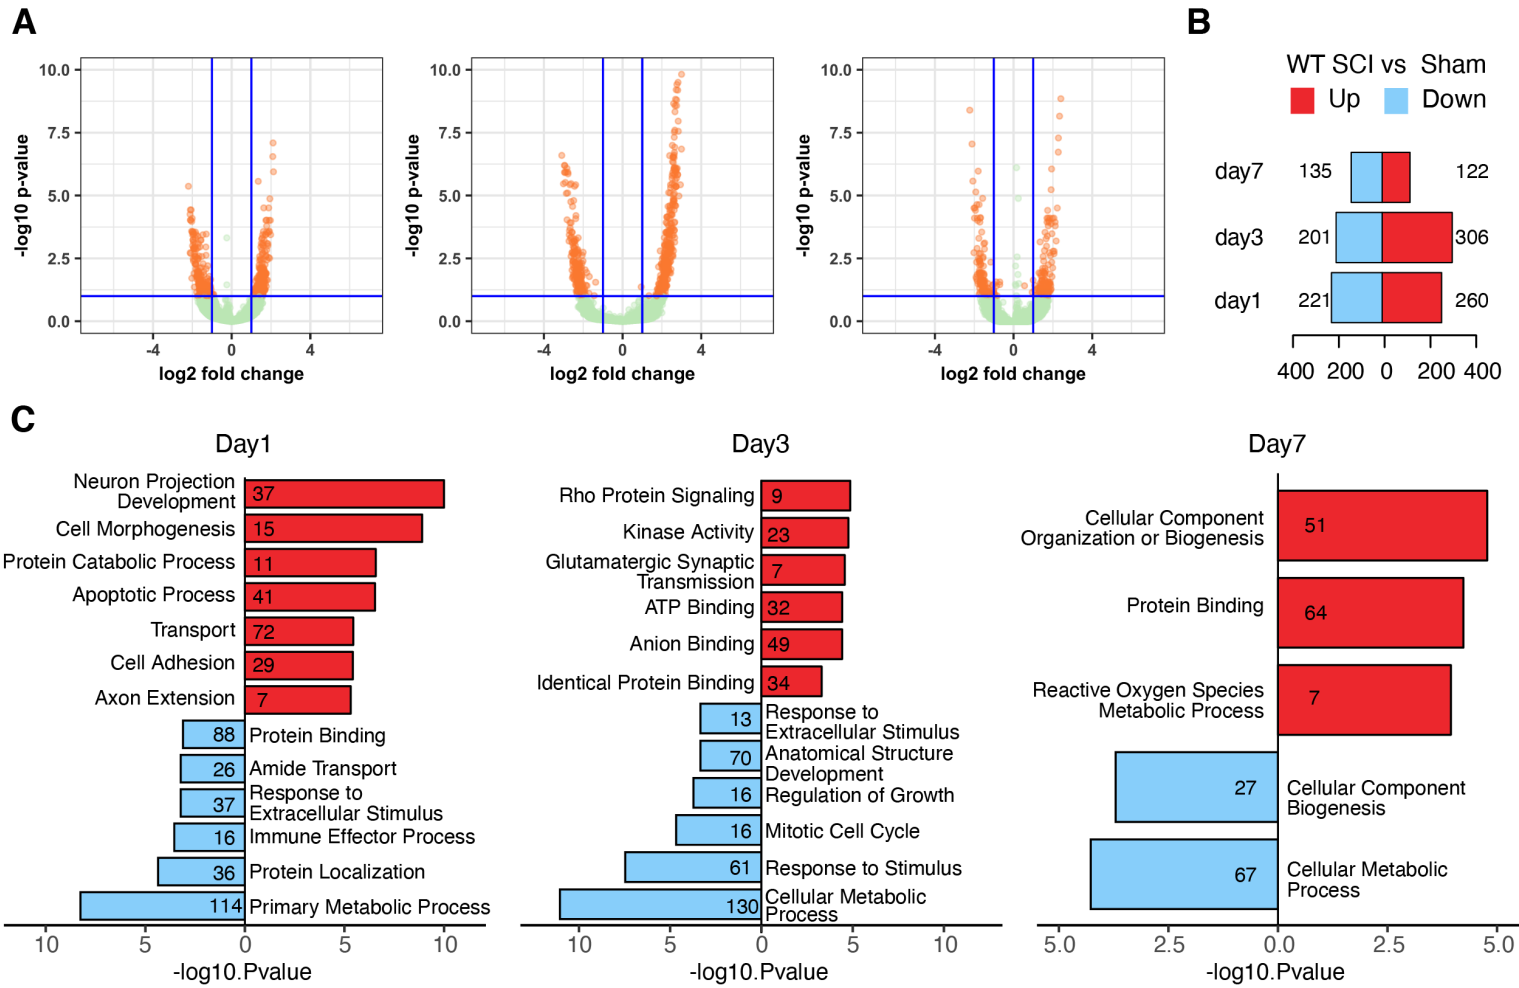

**Figure S2. Differential gene expression analysis on RNA-seq of cortical neurons at 1, 3 and 7 days following SCI, related to Figure 3. (A)** Volcano plots showing differentially expressed genes (DEGs) at FDR p value < 0.1 at 1, 3, 7 and days after SCI compared to sham-treated group. **(B)** Number of DEGs at each time point. Up-regulated: red; Down-regulated genes: blue;  $|\log_2 \text{FC}| > 0.3$ . **(C)** Top gene ontology (GO) terms associated with DEGs at indicated condition (FDR adjusted enrichment p-value). A full list of DEGs are listed in Supplemental Table S1.



Figure S3

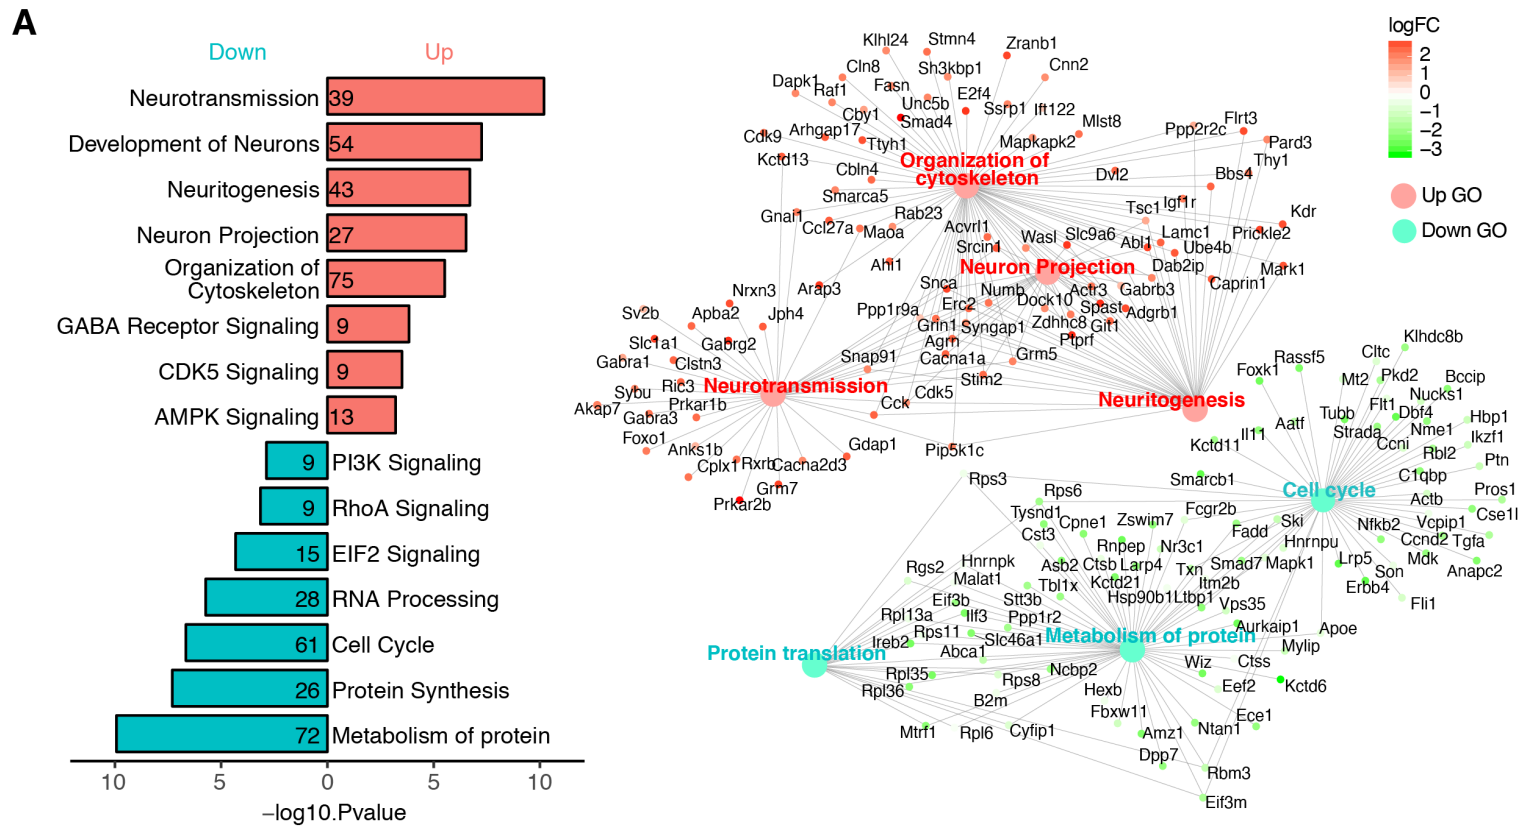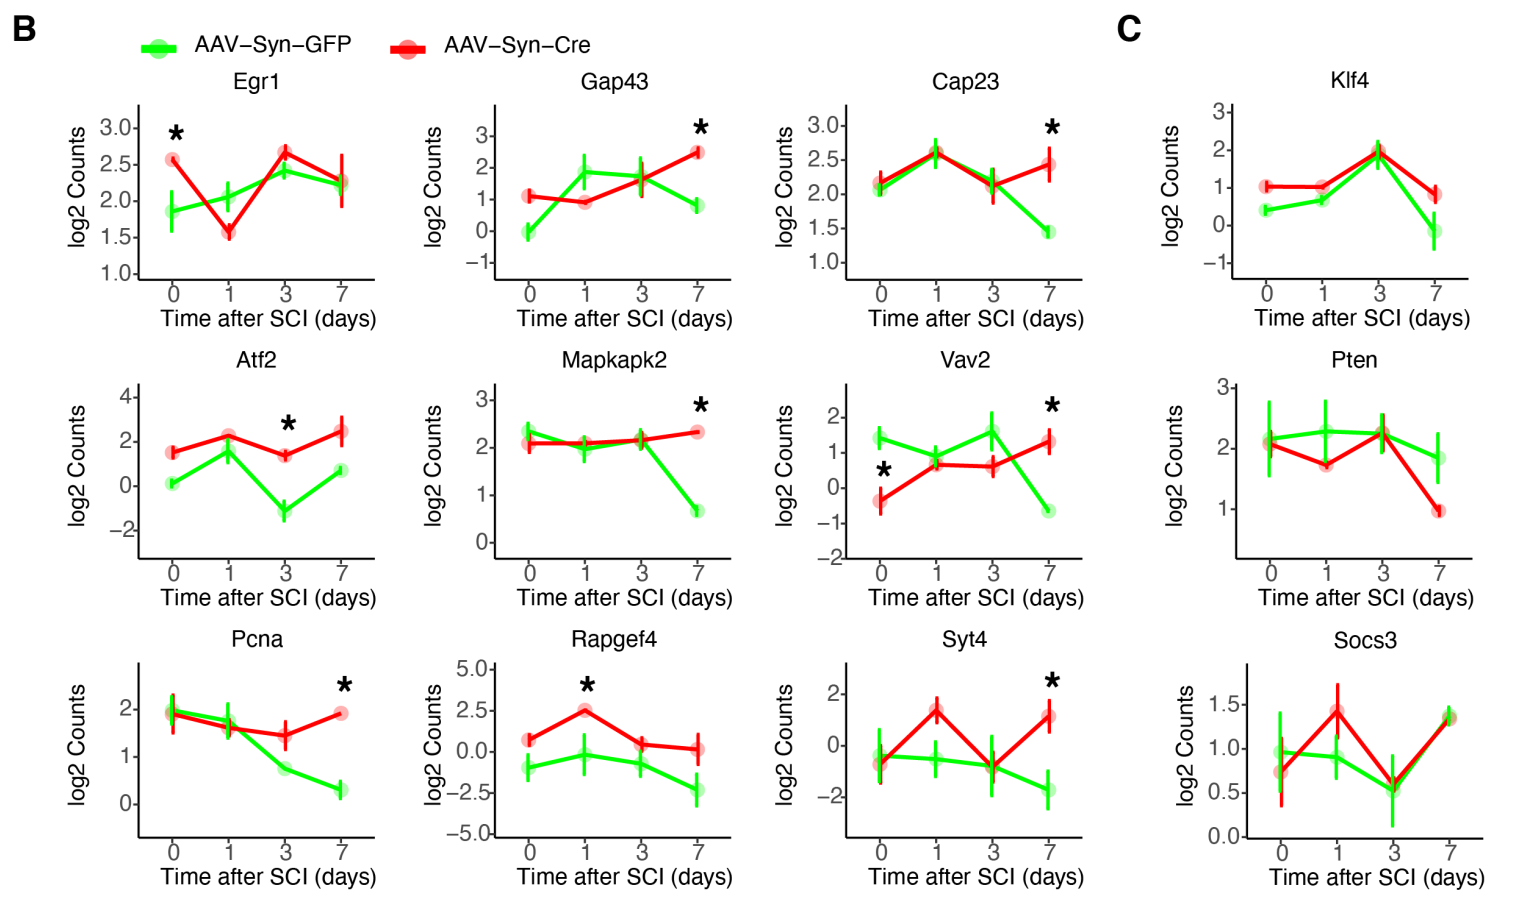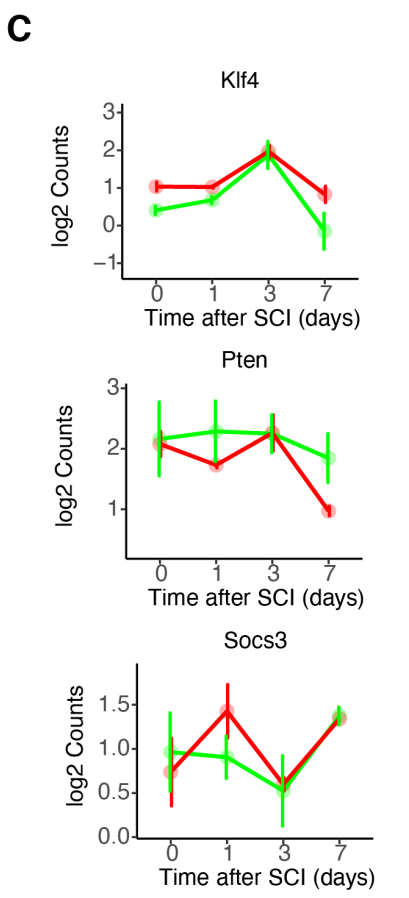

**Figure S3. Differential gene expression analysis on RNA-seq of injured cortical neurons comparing wild-type and REST-depleted mice, related to Figure 3. (A)** Top gene ontology (GO) terms associated with DEGs (FDR p value < 0.1) comparing sensorimotor cortical neurons with or without REST depletion at day 7 following SCI. Bars represent FDR adjusted enrichment p-value in the negative log scale. Numbers in the bars indicate the number of DEGs overlapping existing in each GO term. The network plot shows DEGs enriched in each of the top up- or down-regulated GO terms. Colors indicates logFC of these genes comparing REST knock-out neurons to wild-type controls. **(B-C)** Expression levels of regeneration associated transcription factors (TFs) and genes comparing wild-type with REST knock-out cortical neurons recovered following SCI.

Figure S4

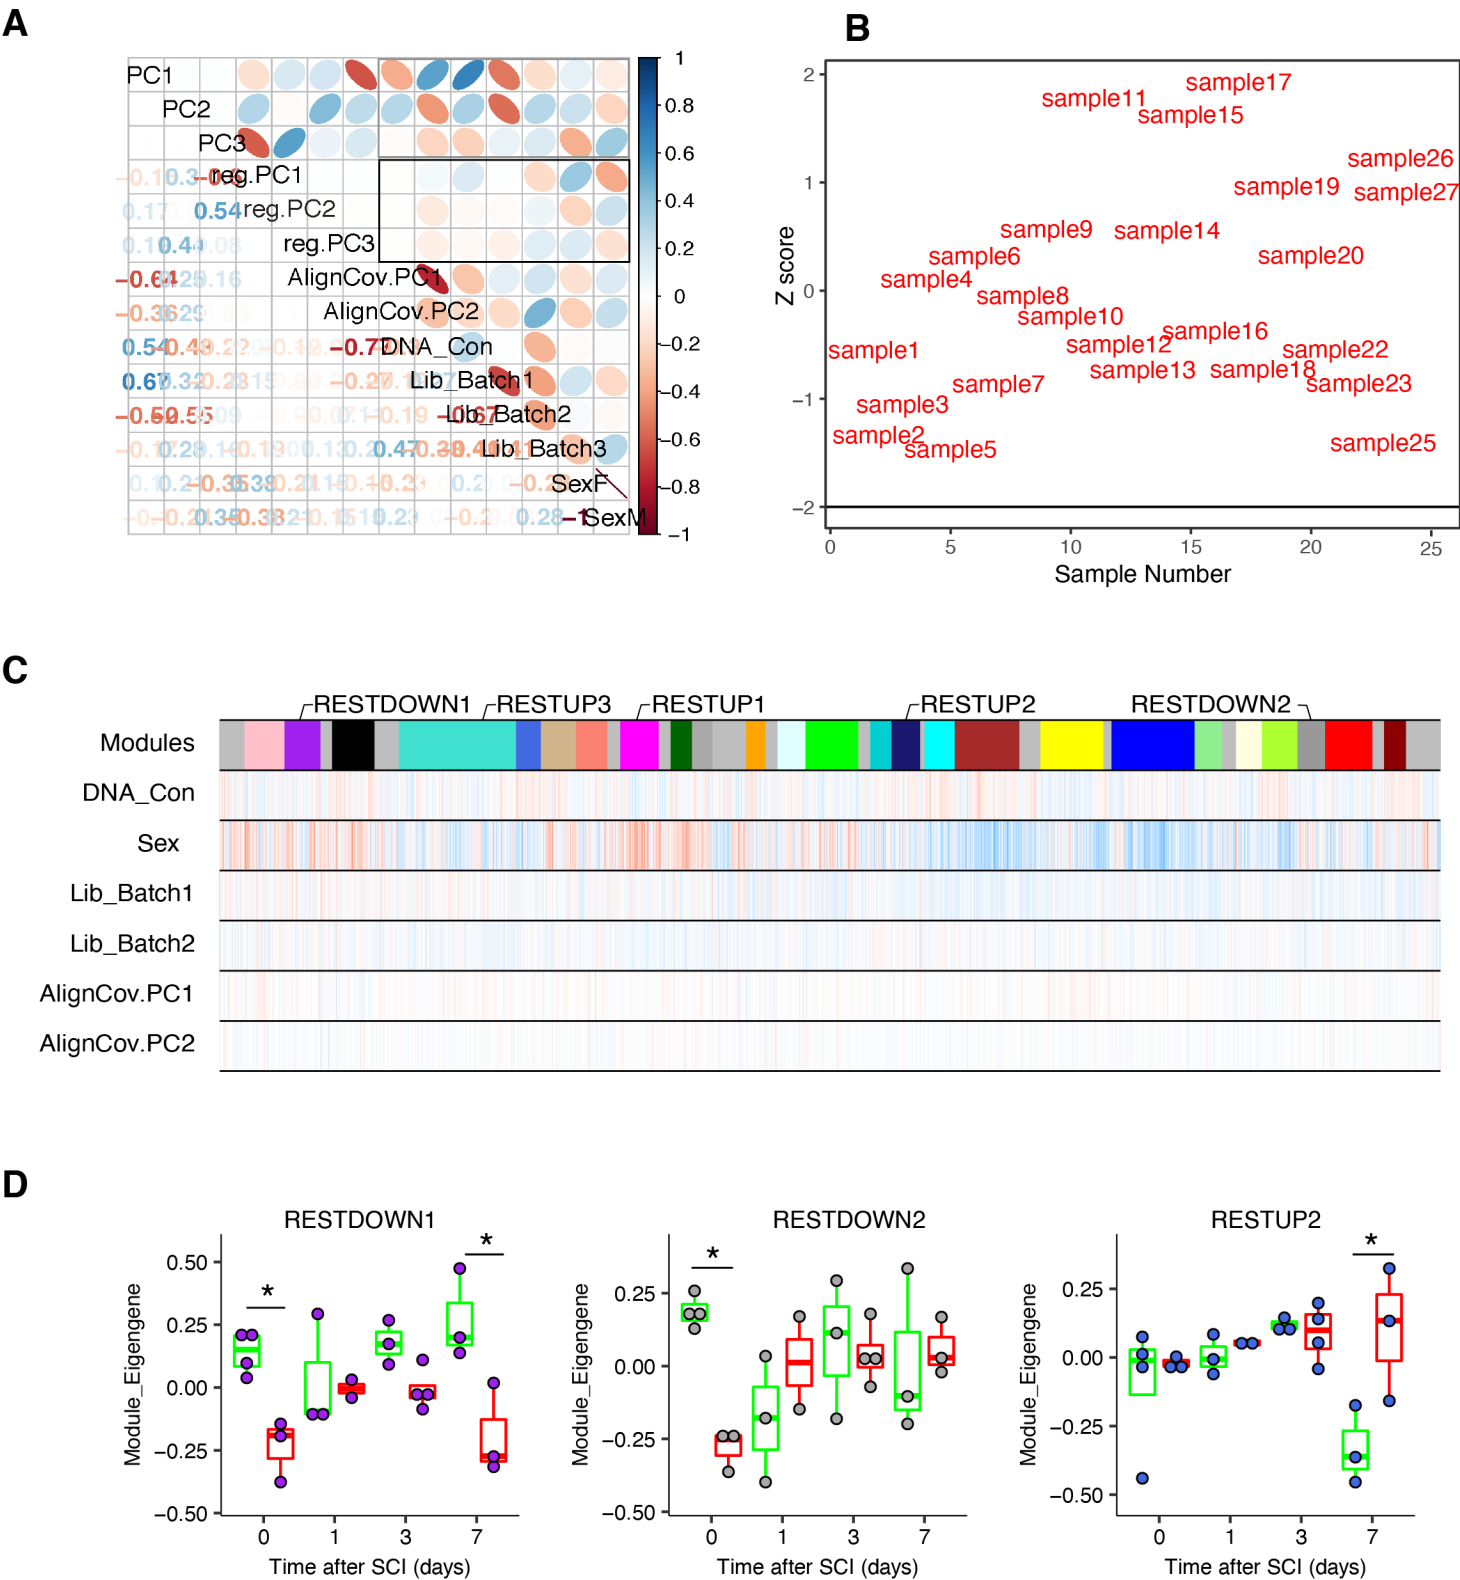

**Figure S4. WGCNA analysis on RNA-seq of wild-type or REST knockout cortical motor neurons recovered following SCI, related to Figure 4. (A)** Correlations between the first three principle components (PCs) of gene expression data with sex, batch, library concentration and sequencing bias, before or after (highlighted by the black square) linear regression of these covariates from the RNA-seq data. **(B)** Sample connectivity to determine outliers and samples with  $|Z\text{-score}| < 2$  were removed. **(C)** WGCNA module correlations with covariates. **(D)** Trajectory of the RESTUP1, RESTDOWN1 and RESTDOWN2 module eigengenes (MEs) across different time points after SCI in AAV-Syn-GFP (green) and AAV-Syn-CRE expressing (red) cortical neurons. Asterisks denote statistical significance assed by ANOVA model with Tuckey's post-hoc test  $*p < 0.05$ ,  $**p < 0.01$  comparing AAV-Syn-CRE to AAV-Syn-GFP. MEs and gene membership in each module (kME) are in Supplemental Table S3.

Figure S5

A

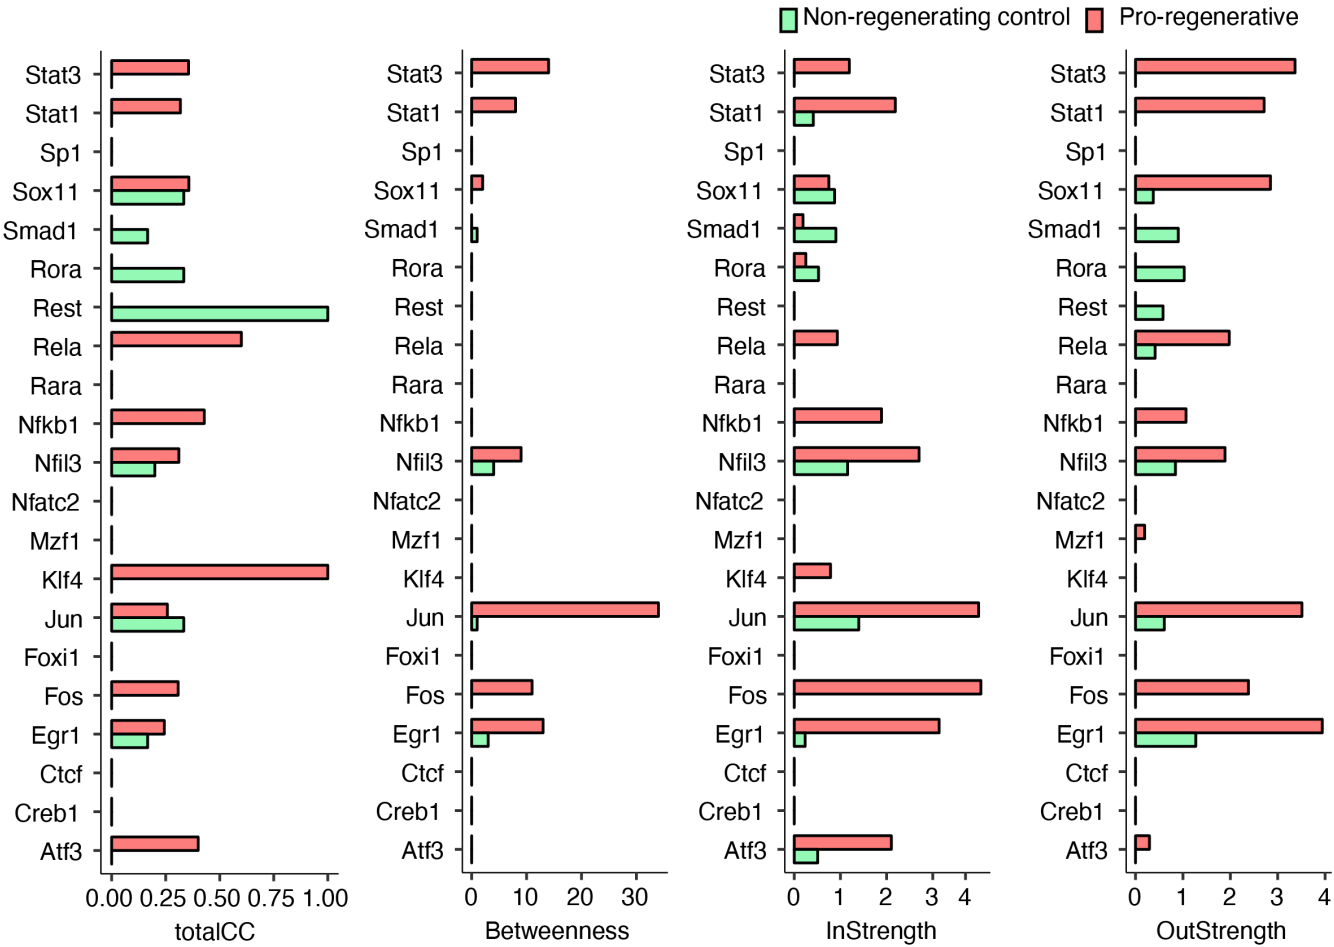

B

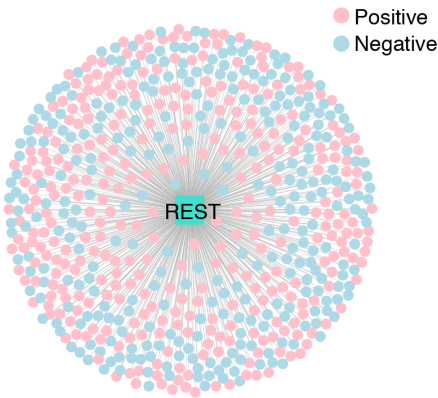

C

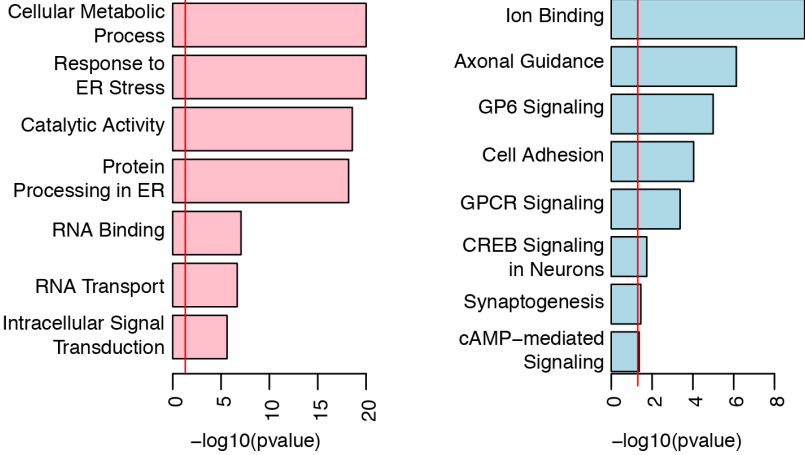

D

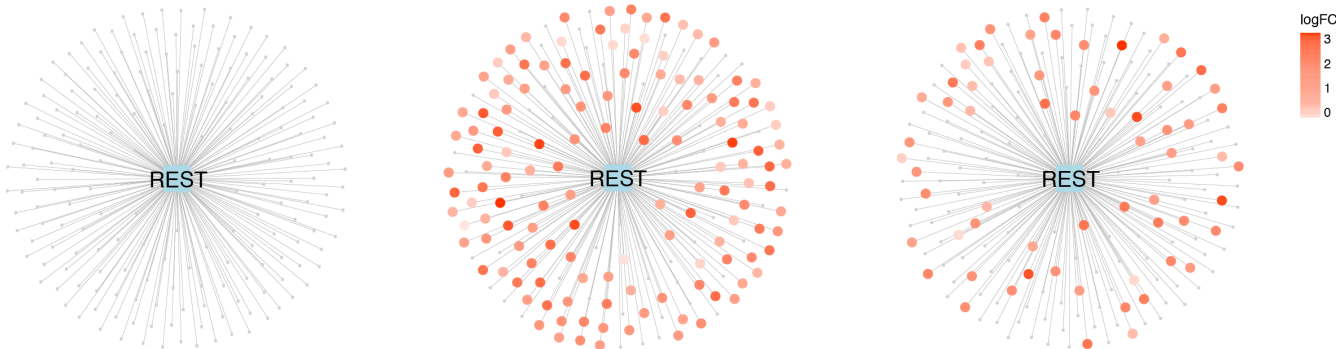

**Figure S5. TF networks comparing injured RGCs with pro-regenerative treatments or non-regenerative control, related to Figure 5.** TF networks were constructed from RNA-seq of RGCs sorted at 1, 3, 5 days after optic nerve crush alone (non-regenerating control) or with pro-regenerative treatment (AAV2-shPten.mCherry/Oncomodulin/CPT-cAMP; pro-regenerative), using the unbiased, step-wise pipeline described in Figure 2A. **(A)** Parameters indicating connectivity of each TF in the networks of pro-regenerative RGCs and non-regenerating control RGCs. **Local clustering coefficient (totalCC):** the clustering coefficient of a vertex which is calculated as the number of links between the vertices within its neighborhood divided by the number of links that are possible between them. A high local clustering coefficient suggest a tightly connected local network. **Betweenness:** the fraction of the shortest paths between all pairs of vertices that pass through one vertex. **InStrength or OutStrength:** the number of links connected to one vertex. In directed and weighted networks, the number of arcs that end at the node is defined as “InStrenght”, and the number of arcs that start from the node is defined as “OutStrenght”. **(B)** Genes that are positively regulated (activated, pink-colored nodes) or negatively regulated (repressed, blue-colored nodes) by REST defined by ARACNe from RNA-seq of RGCs sorted at 1, 3, 5 days after optic nerve crush alone or with pro-regenerative treatment. FDR adjusted p value < 0.05, permutations = 100, bootstrap consensus = 95% were used to identify REST-regulated genes by ARACNe. **(C)** Top GO terms of REST-activated genes and REST-repressed genes. **(D)** Overlap between REST-repressed genes and up-regulated genes by pro-regenerative treatment in RGCs at day 3 and day 5 following optic nerve crush. Colors represent logFC of significantly up-regulated genes by pro-regenerative treatments determined by FDR < 0.1. A full list of REST-repressed genes is shown in Supplemental Table S4.

Figure S6

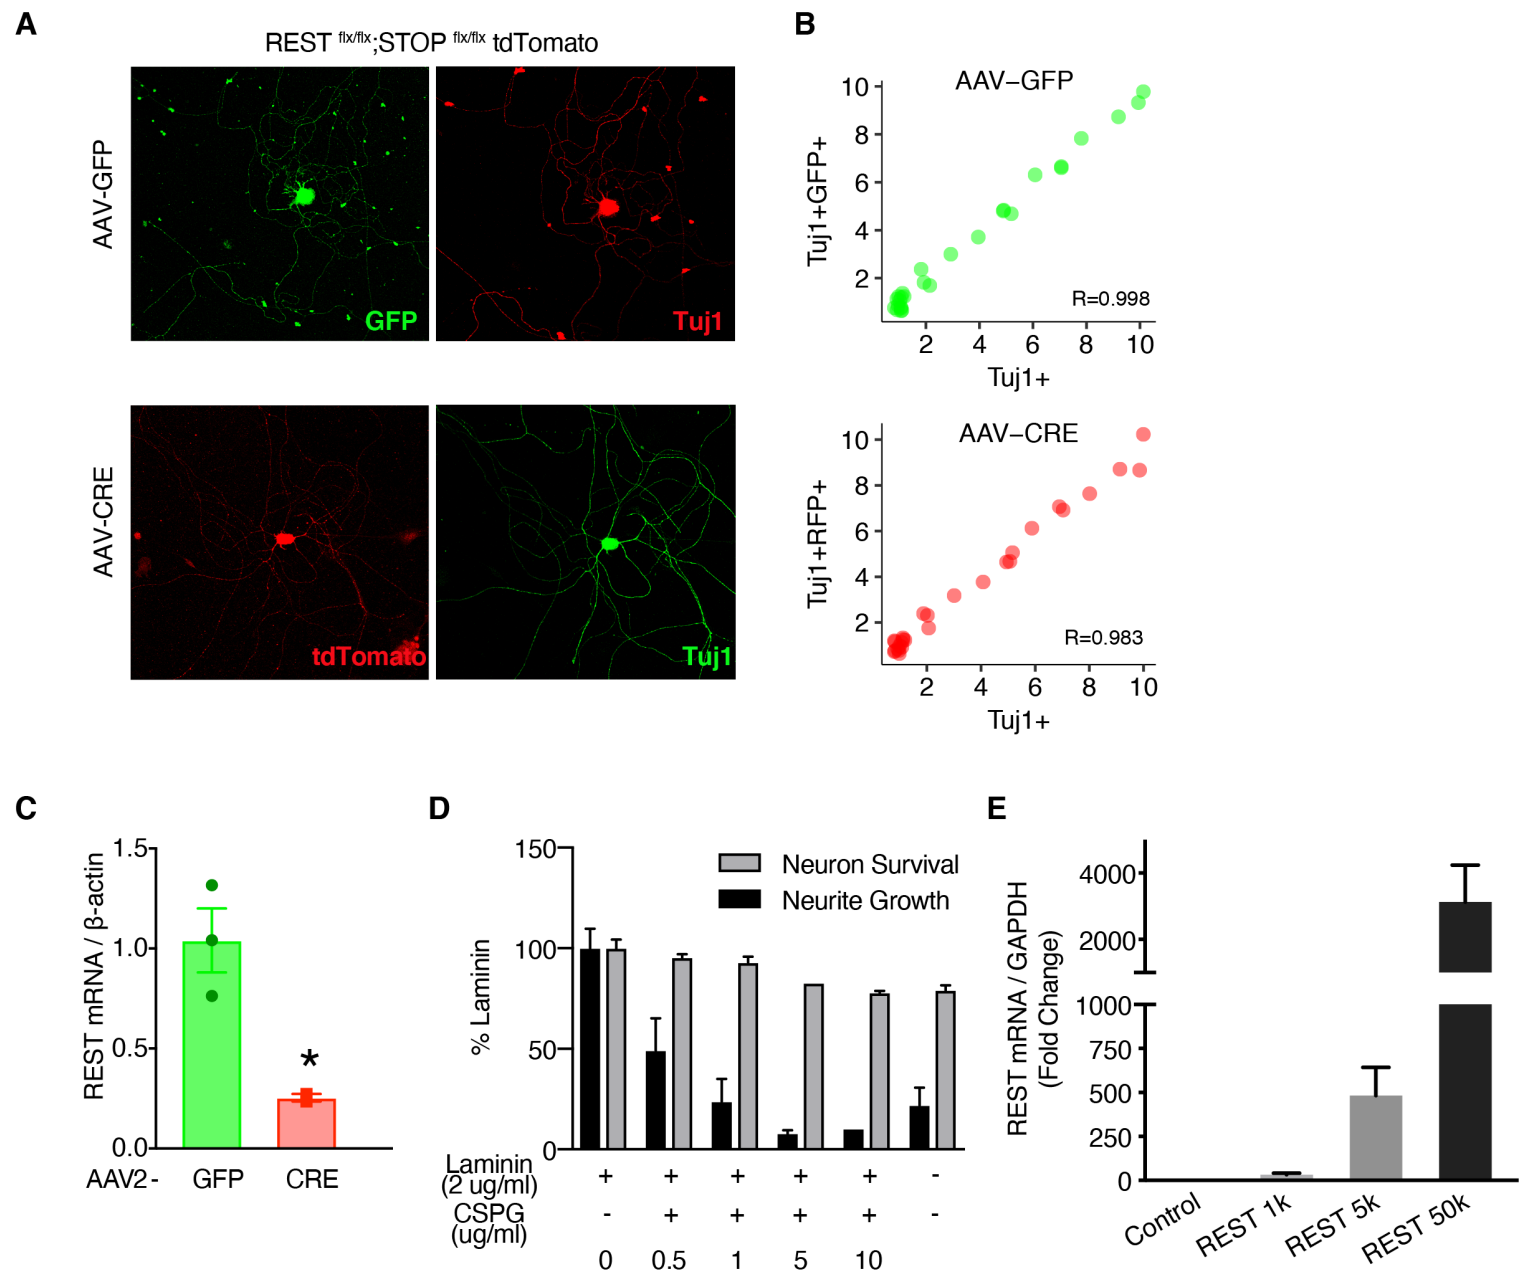

**Figure S6. Validation of REST overexpression or knockdown in vitro, related to Figure 6.** REST flx/flx;tdTomato DRG cells were transduced with AAV-GFP or AAV-CRE for 7 days. **(A)** Confocal images of GFP or tdTomato co-stained with the neuronal marker Tuj1 to confirm efficient AAV transduction into DRG neurons as well as Cre-induced tdTomato expression, an indication of REST deletion. **(B)** A Pearson correlation between the number of Tuj-expressing neurons (Tuj1+) and the ones also expressing GFP (Tuj1+GFP+; AAV-GFP transduced neurons) or tdTomato (Tuj1+RFP+; AAV-CRE transduced neurons). Each dot represents an individual image quantified. A high correlation suggests efficient transduction of AAVs into the DRG neurons. **(C)** qRT-PCR of REST mRNA levels to confirm REST knockdown. **(D)** Neurite outgrowth and neuronal survival at indicated doses of CSPG to determine an optimal dose of CSPG used in Figure 6A. **(E)** qRT-PCR of REST mRNA levels in DRG neurons to confirm REST overexpression by transducing the lentiviral constructs containing REST. Humanized luciferase protein (Lv135-hLuc) was used as a control. Bars represents means $\pm$ SEM for **(C-E)**.



Figure S7

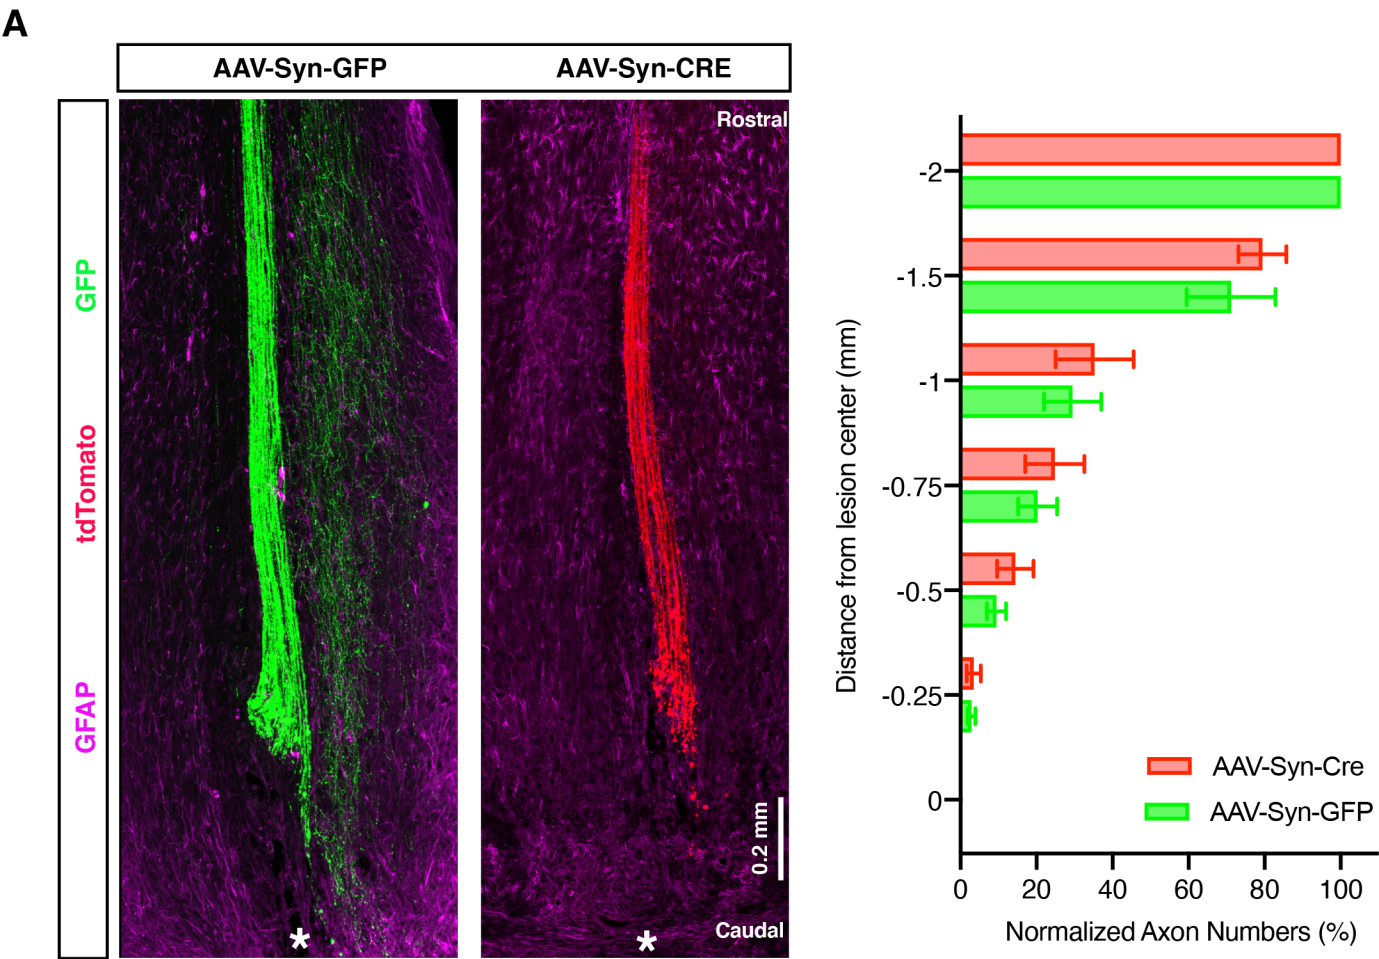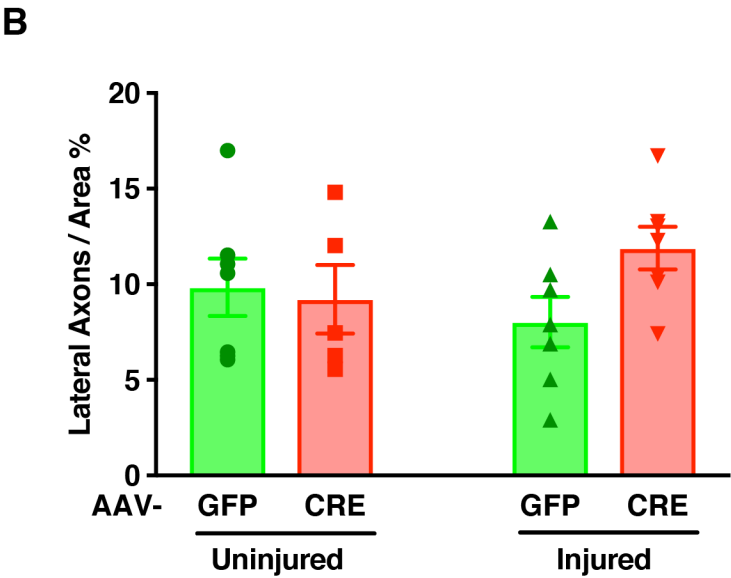

**Figure S7. Corticospinal (CST) axon staining 3 days after spinal cord injury or in non-injured conditions, related to Figure 7. (A)** Confocal images and quantitation of GFP or tdTomato labeled axons in horizontal sections of lesioned spinal cord also stained for astrocytes (glial fibrillary acidic protein (GFAP)). REST<sup>flx/flx</sup>;tdTomato mice were injected into the sensorimotor cortex with AAV-Syn-GFP (wild-type) and AAV-Syn-CRE (REST cKO) for 4 weeks followed by a full crush at thoracic spinal cord level 10 (T10). Spinal cord was recovered 3 days post-injury. Lesion center was marked with \*. To quantify axon numbers at indicated distances from lesion center, N=4 mice for each group was used. Bars represent means±SEM; no statistical difference was found between AAV-Syn-GFP with AAV-Syn-Cre using two-way ANOVA followed by Sidak. **(B)** Quantitation of total number of BDA-labeled axons in uninjured, or injured REST<sup>flx/flx</sup> mice receiving AAV-GFP or AAV-CRE. The paradigm for AAV transduction, spinal cord injury and BDA labeling was the same as described in Figure 7, except that SCI was not performed on uninjured mice. Total number of BDA-labeled axons in injured mice was counted 3 mm rostral to the lesion center. Bars represent means±SEM; No statistical difference was found by one-way ANOVA with Sidak post-hoc test compared to uninjured AAV-GFP.

Figure S8

A

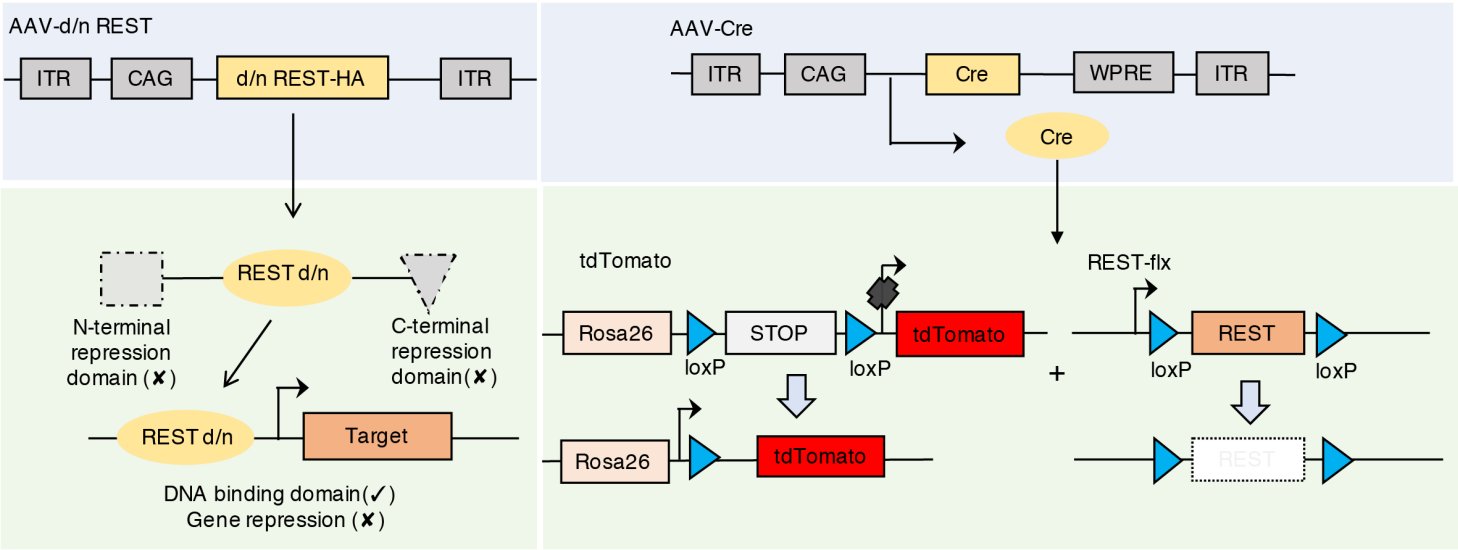

B

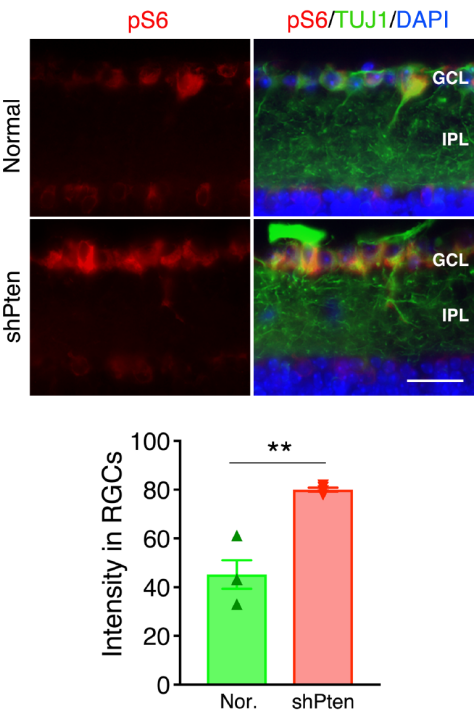

C

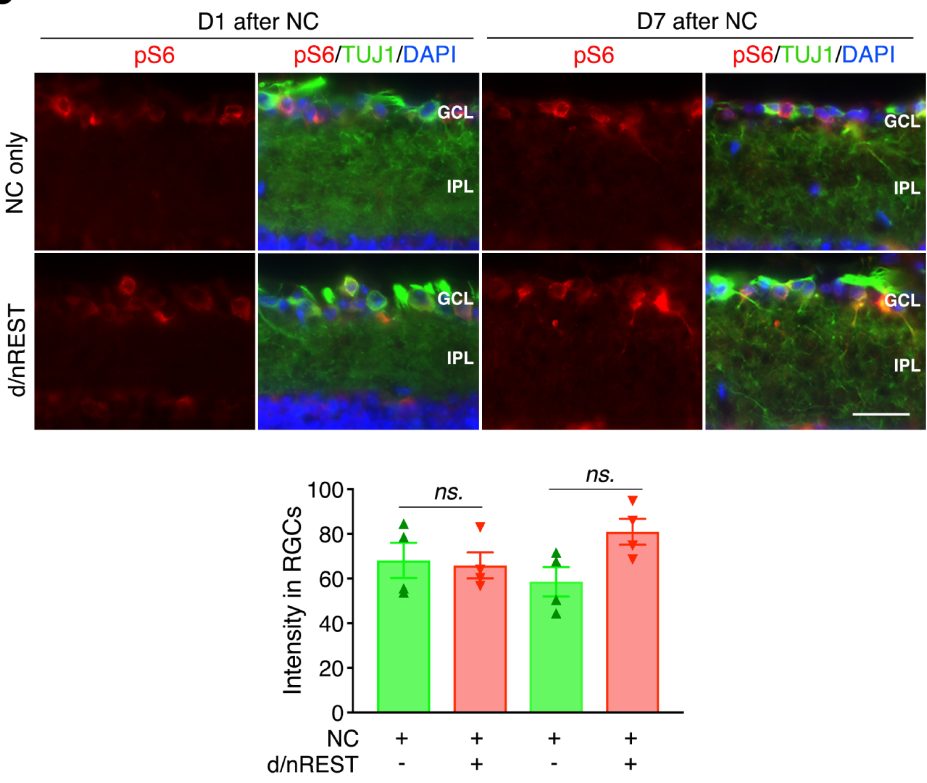

**Figure S8. Conditional depletion or inhibition of REST in the model of optic nerve injury, related to Figure 8. (A)** Schematic displaying strategies to induce REST inhibition or REST depletion in retina cells. **(B-C)** Inactivation of PTEN or REST initiates different downstream signaling pathways. Changes of phospho-S6 immunostaining (pS6, red) in RGCs (visualized by immunostaining for  $\beta$ III tubulin, green) after AAV2- mediated knock-down of PTEN (shPten) after optic nerve crush (NC), comparing with normal retina (Nor.) **(B)** or expression of dominant-negative REST (d/nREST) **(C)**. Whereas knockdown of PTEN elevated levels of p-S6 **(B)**, REST deletion did not **(C: expression shown at 1 and 7 days after nerve crush)**. \*\*  $p < 0.01$  *t*-test in A, one-way ANOVA followed by Sidak test in B. Scale bars: 45  $\mu$ m.
